# Supplementary material for: Specific changes in mitochondrial lipidome alter mitochondrial proteome and increase the geroprotective efficiency of lithocholic acid in chronologically aging yeast
Source: PubMed Central journal article supplement (PMC5458158; doi:10.18632/oncotarget.16766), 2017-03-31
Supplement: oncotarget-08-30672-s001.pdf [file oncotarget-08-30672-s001.pdf]

## Specific changes in mitochondrial lipidome alter mitochondrial proteome and increase the geroprotective efficiency of lithocholic acid in chronologically aging yeast

### Supplementary Material

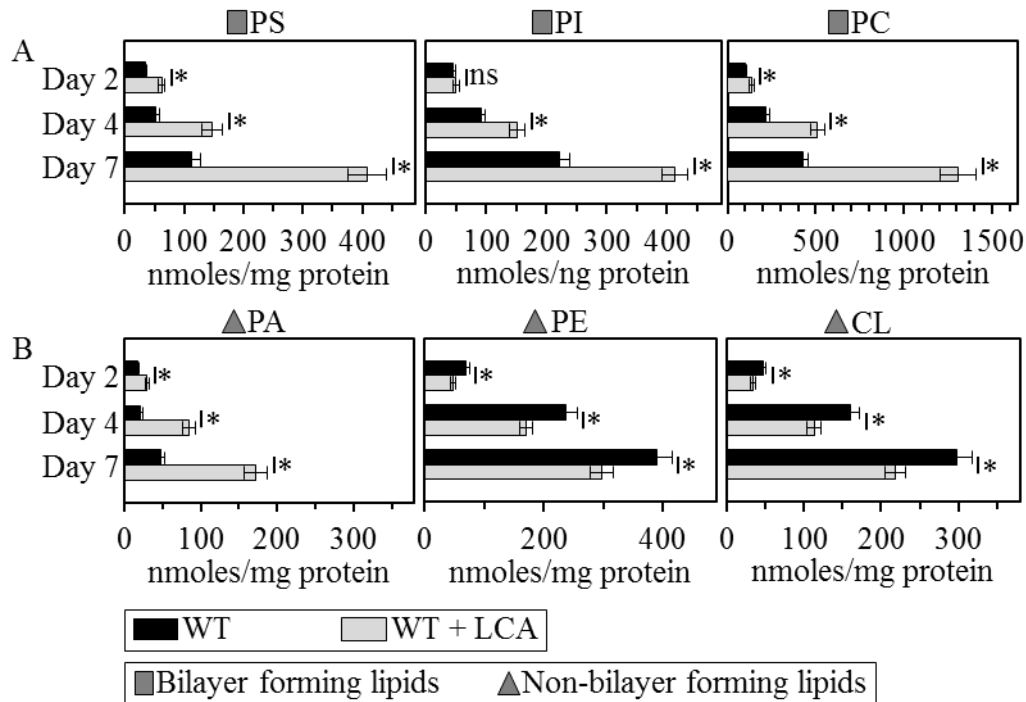

**Supplemental Figure S1. LCA exhibits age-related differential effects on the concentrations of different classes of mitochondrial membrane phospholipids in chronologically aging wild-type (WT) yeast.** WT cells were cultured in the nutrient-rich YP medium initially containing 0.2% glucose with 50  $\mu$ M LCA or without it. Mitochondria were purified from cells recovered on day 2, 4 or 7 of cell culturing. Extraction of mitochondrial membrane lipids, and mass spectrometric identification and quantitation of the extracted phospholipid classes were carried out as described in Materials and methods. The concentrations of phospholipids were calculated as nmoles phospholipid/mg protein. **(A)** PS, PI and PC are phospholipid classes that exhibit the bilayer forming shape of a cylinder; they decrease the extent of membrane curving for the IMM. **(B)** PA, PE and CL are phospholipid classes that have the non-bilayer forming shape of a cone; they increase the extent of membrane curving for the IMM. Data are presented as means  $\pm$  SEM ( $n = 3$ ; \* $p < 0.05$ ; ns, not significant). Abbreviations: CL, cardiolipin; PA, phosphatidic acid; PC, phosphatidylcholine; PE, phosphatidylethanolamine; PA, phosphatidic acid; PI, phosphatidylinositol; PS, phosphatidylserine.

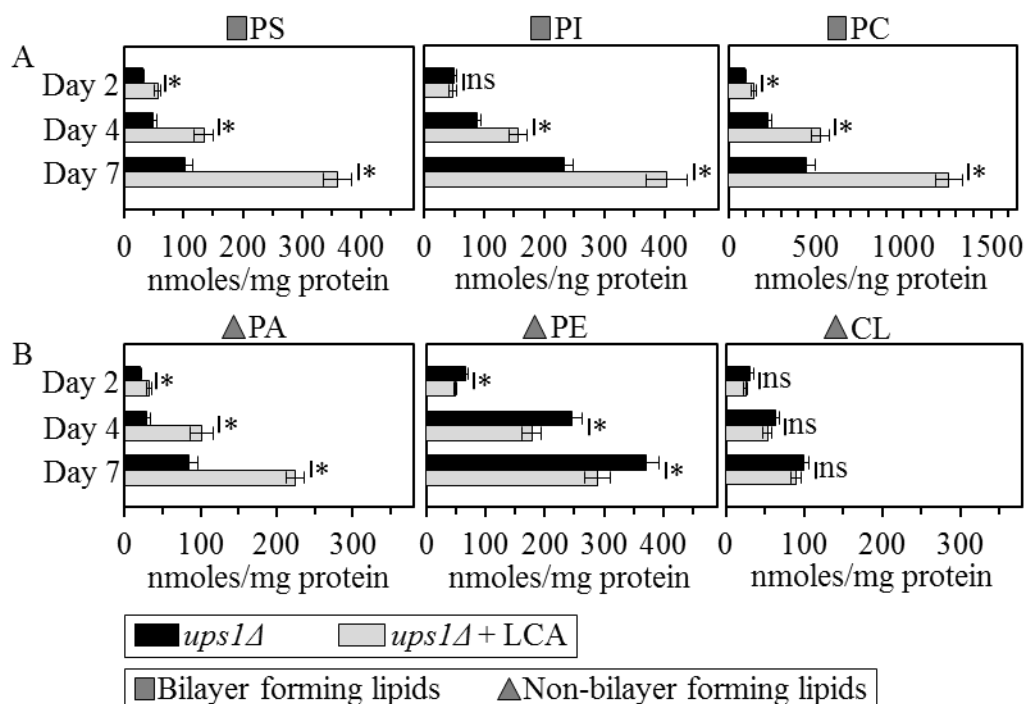

**Supplemental Figure S2. LCA exhibits age-related differential effects on the concentrations of different classes of mitochondrial membrane phospholipids in chronologically aging *ups1Δ* yeast.** Cells of the *ups1Δ* mutant strain were cultured in the nutrient-rich YP medium initially containing 0.2% glucose with 50  $\mu$ M LCA or without it. Mitochondria were purified from cells recovered on day 2, 4 or 7 of cell culturing. Extraction of mitochondrial membrane lipids, and mass spectrometric identification and quantitation of the extracted phospholipid classes were carried out as described in Materials and methods. The concentrations of phospholipids were calculated as nmoles phospholipid/mg protein. (**A**) PS, PI and PC are phospholipid classes that exhibit the bilayer forming shape of a cylinder; they decrease the extent of membrane curving for the IMM. (**B**) PA, PE and CL are phospholipid classes that have the non-bilayer forming shape of a cone; they increase the extent of membrane curving for the IMM. Data are presented as means  $\pm$  SEM ( $n = 3$ ; \* $p < 0.05$ ; ns, not significant). Abbreviations: CL, cardiolipin; PA, phosphatidic acid; PC, phosphatidylcholine; PE, phosphatidylethanolamine; PA, phosphatidic acid; PI, phosphatidylinositol; PS, phosphatidylserine.

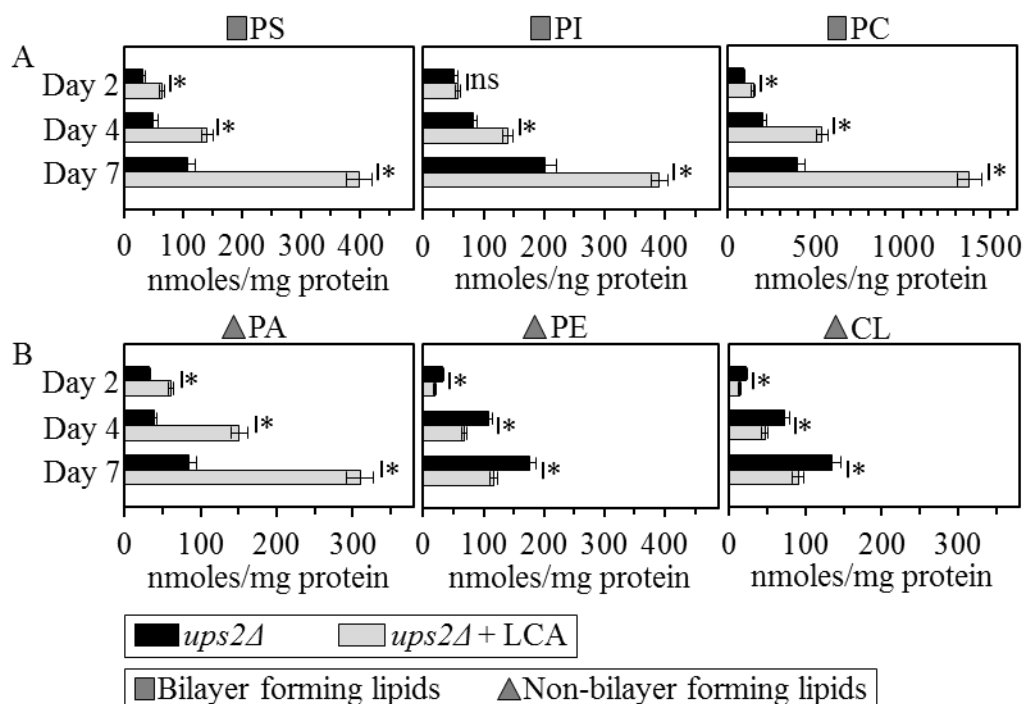

**Supplemental Figure S3. LCA exhibits age-related differential effects on the concentrations of different classes of mitochondrial membrane phospholipids in chronologically aging *ups2Δ* yeast.** Cells of the *ups2Δ* mutant strain were cultured in the nutrient-rich YP medium initially containing 0.2% glucose with 50  $\mu$ M LCA or without it. Mitochondria were purified from cells recovered on day 2, 4 or 7 of cell culturing. Extraction of mitochondrial membrane lipids, and mass spectrometric identification and quantitation of the extracted phospholipid classes were carried out as described in Materials and methods. The concentrations of phospholipids were calculated as nmoles phospholipid/mg protein. (**A**) PS, PI and PC are phospholipid classes that exhibit the bilayer forming shape of a cylinder; they decrease the extent of membrane curving for the IMM. (**B**) PA, PE and CL are phospholipid classes that have the non-bilayer forming shape of a cone; they increase the extent of membrane curving for the IMM. Data are presented as means  $\pm$  SEM ( $n = 3$ ; \* $p < 0.05$ ; ns, not significant). Abbreviations: CL, cardiolipin; PA, phosphatidic acid; PC, phosphatidylcholine; PE, phosphatidylethanolamine; PA, phosphatidic acid; PI, phosphatidylinositol; PS, phosphatidylserine.

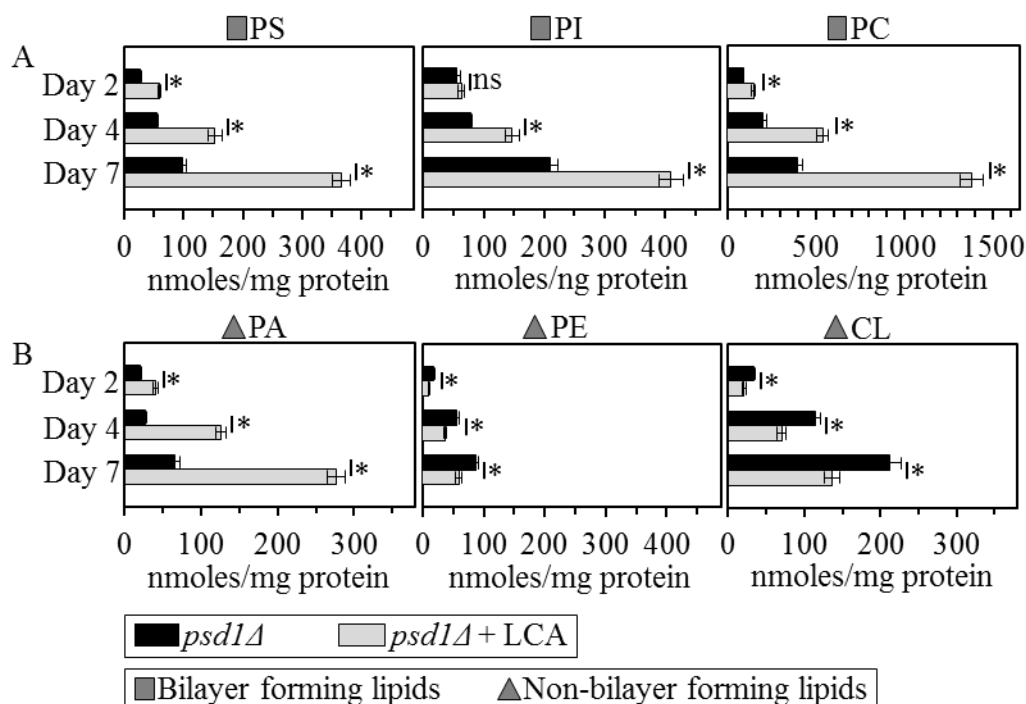

**Supplemental Figure S4. LCA exhibits age-related differential effects on the concentrations of different classes of mitochondrial membrane phospholipids in chronologically aging *psd1Δ* yeast.** Cells of the *psd1Δ* mutant strain were cultured in the nutrient-rich YP medium initially containing 0.2% glucose with 50  $\mu$ M LCA or without it. Mitochondria were purified from cells recovered on day 2, 4 or 7 of cell culturing. Extraction of mitochondrial membrane lipids, and mass spectrometric identification and quantitation of the extracted phospholipid classes were carried out as described in Materials and methods. The concentrations of phospholipids were calculated as nmoles phospholipid/mg protein. **(A)** PS, PI and PC are phospholipid classes that exhibit the bilayer forming shape of a cylinder; they decrease the extent of membrane curving for the IMM. **(B)** PA, PE and CL are phospholipid classes that have the non-bilayer forming shape of a cone; they increase the extent of membrane curving for the IMM. Data are presented as means  $\pm$  SEM ( $n = 3$ ; \* $p < 0.05$ ; ns, not significant). Abbreviations: CL, cardiolipin; PA, phosphatidic acid; PC, phosphatidylcholine; PE, phosphatidylethanolamine; PA, phosphatidic acid; PI, phosphatidylinositol; PS, phosphatidylserine.

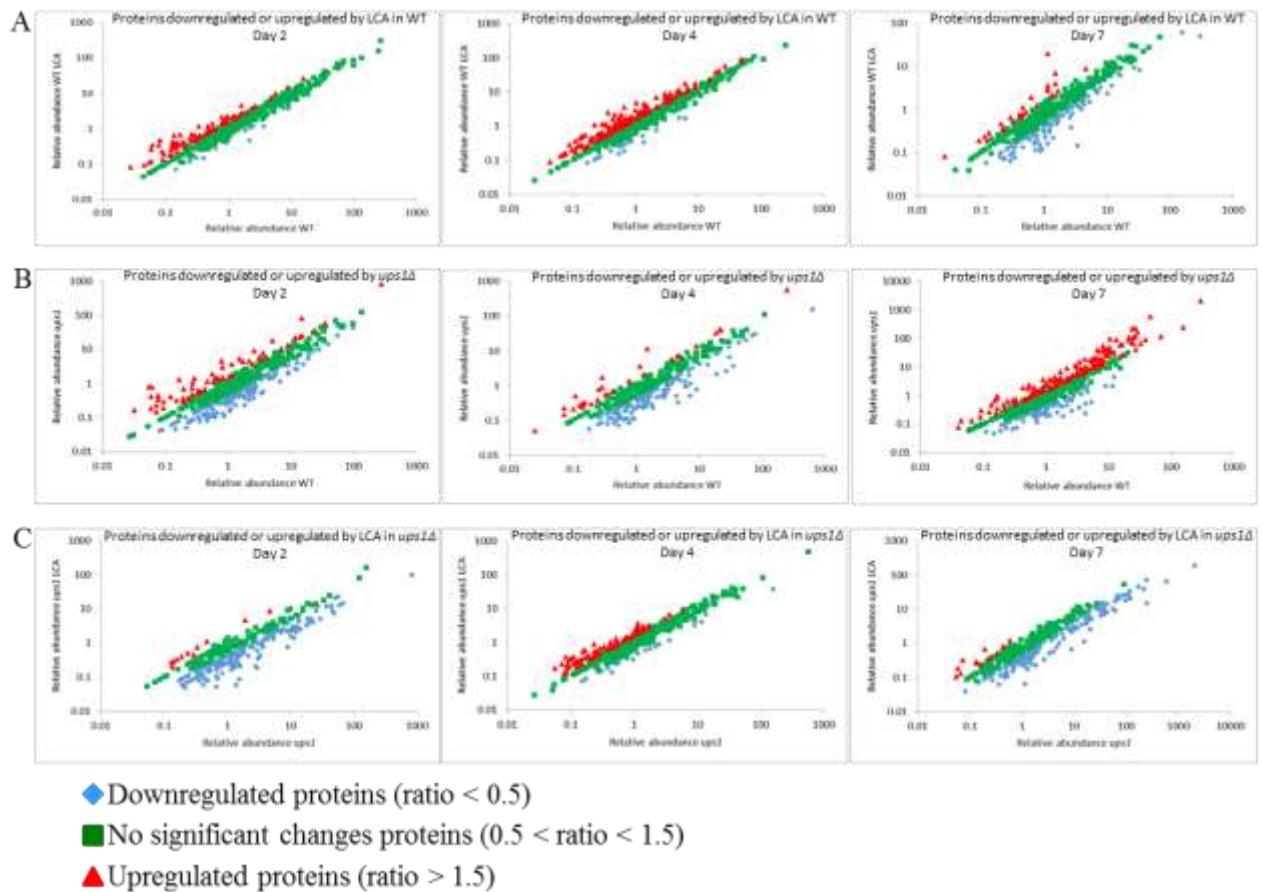

**Supplemental Figure S5. Scatter plots comparing the relative concentrations of proteins in mitochondria purified from WT or *ups1Δ* (short-lived) cells cultured with or without LCA.**

Mitochondria were purified from WT or *ups1Δ* cells recovered on day 2, 4 or 7 of cell culturing. Mass spectrometry-based identification and quantitation of proteins recovered in purified mitochondria were performed as described in Materials and methods. Scatter plots comparing the relative abundance of mitochondrial proteins between specified datasets were plotted on a log-log scale spanning six orders of magnitude. Data on the relative abundance of mitochondrial proteins are presented as means of 2 independent experiments.

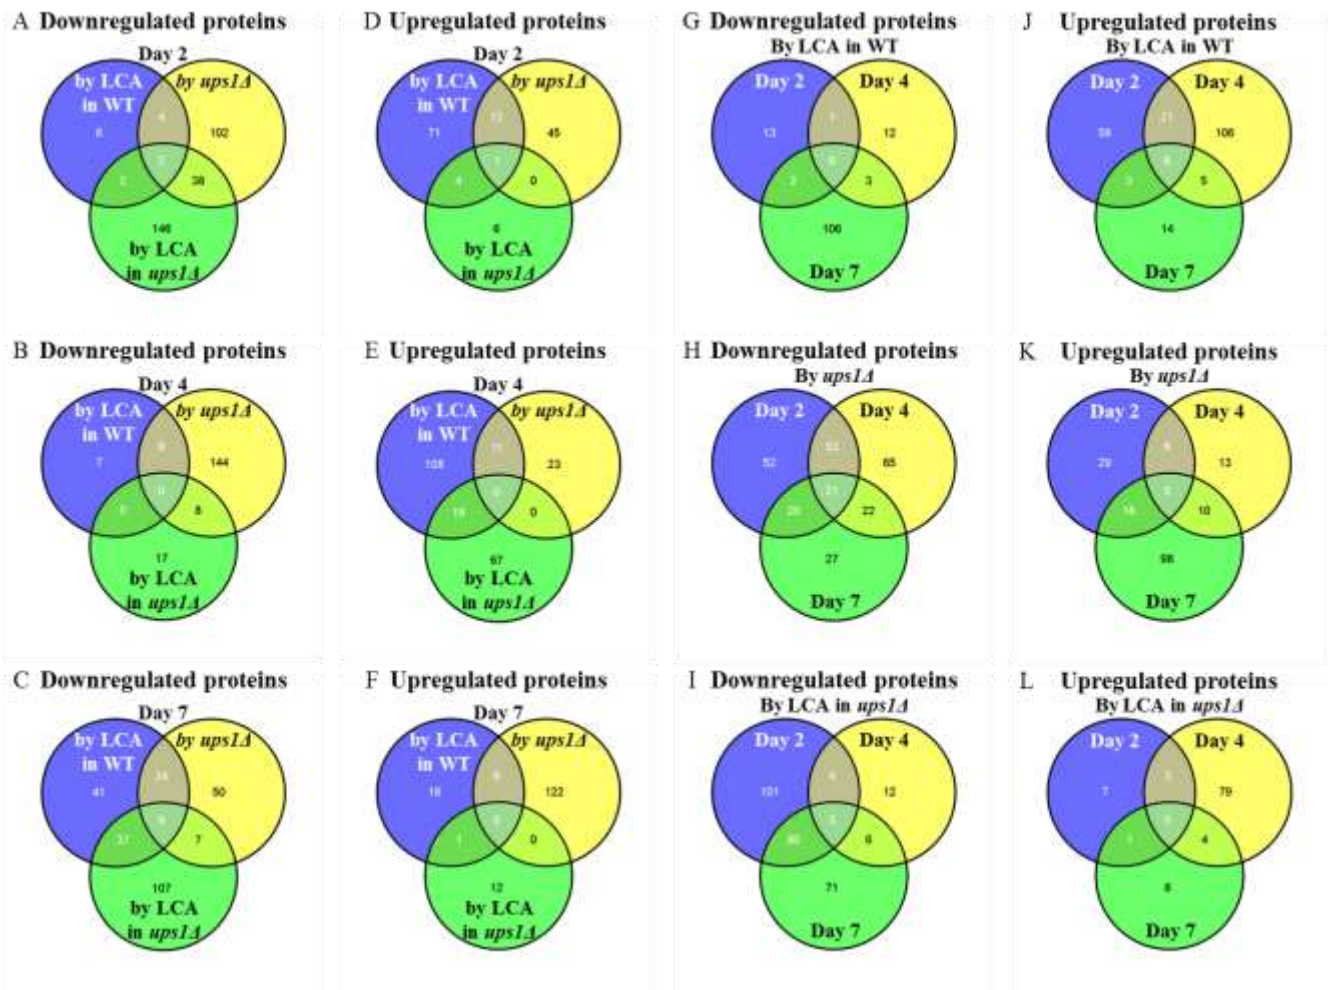

**Supplemental Figure S6. The *ups1Δ* mutation alters the concentrations of many mitochondrial proteins in yeast cultured with or without LCA.** (A – F) Venn diagrams showing a comparison of the datasets of relative concentrations of mitochondrial proteins that are statistically significantly downregulated or upregulated by LCA in WT, by the *ups1Δ* mutation in the absence of LCA, and by LCA in *ups1Δ* cells; WT cells were recovered on day 2, 4 or 7 of culturing. (G and J) Venn diagrams showing a comparison of the datasets of relative concentrations of mitochondrial proteins that are statistically significantly downregulated or upregulated by LCA in WT cells recovered on day 2, 4 or 7 of culturing. (H and K) Venn diagrams showing a comparison of the datasets of relative concentrations of mitochondrial proteins that are statistically significantly downregulated or upregulated by the *ups1Δ* mutation in the absence of LCA; *ups1Δ* cells were recovered on day 2, 4 or 7 of culturing. (I and L) Venn diagrams showing a comparison of the datasets of relative concentrations of mitochondrial proteins that are statistically significantly downregulated or upregulated by LCA in *ups1Δ* cells recovered on day 2, 4 or 7 of culturing.

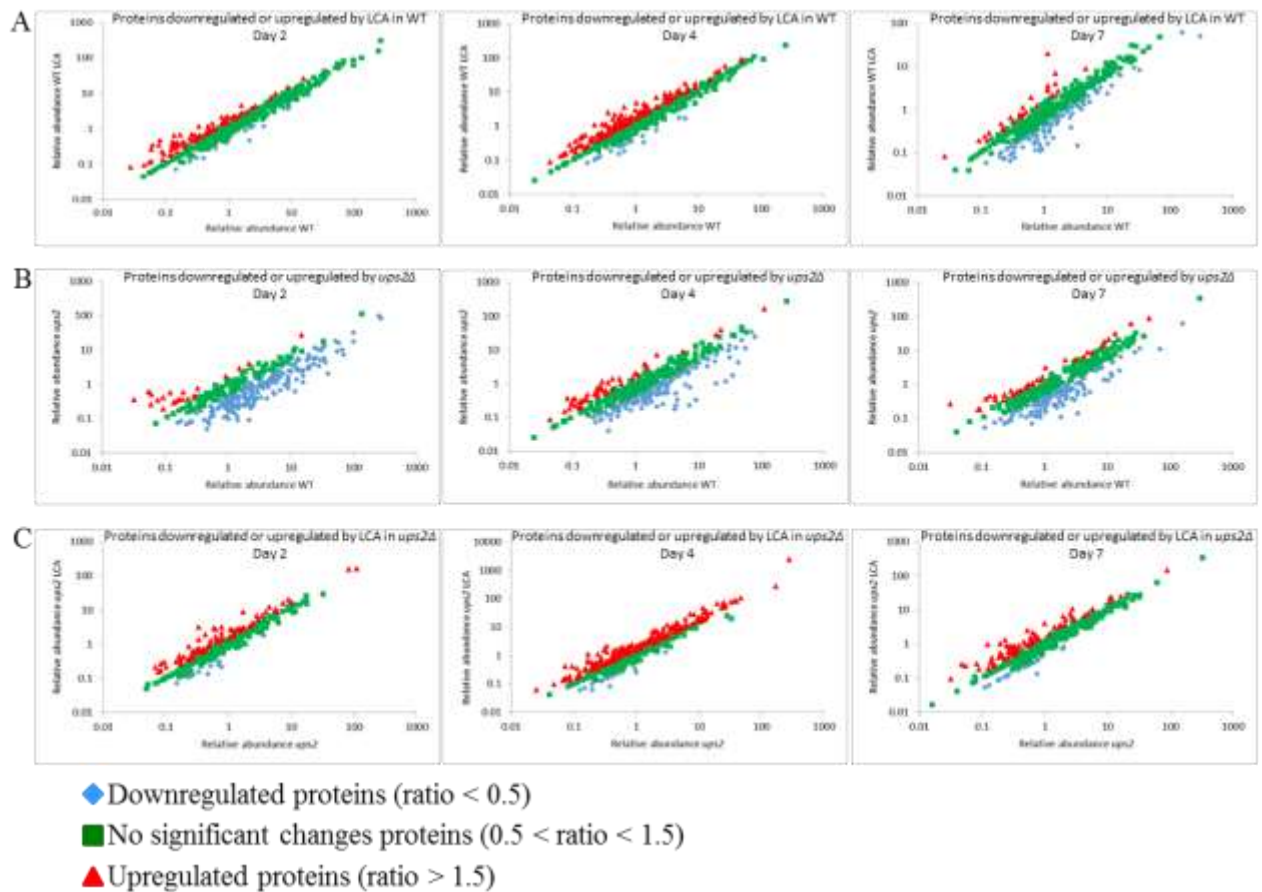

**Supplemental Figure S7. Scatter plots comparing the relative concentrations of proteins in mitochondria purified from WT or *ups2Δ* (long-lived) cells cultured with or without LCA.** Mitochondria were purified from WT or *ups2Δ* cells recovered on day 2, 4 or 7 of cell culturing. Mass spectrometry-based identification and quantitation of proteins recovered in purified mitochondria were performed as described in Materials and methods. Scatter plots comparing the relative abundance of mitochondrial proteins between specified datasets were plotted on a log-log scale spanning six orders of magnitude. Data on the relative abundance of mitochondrial proteins are presented as means of 2 independent experiments.

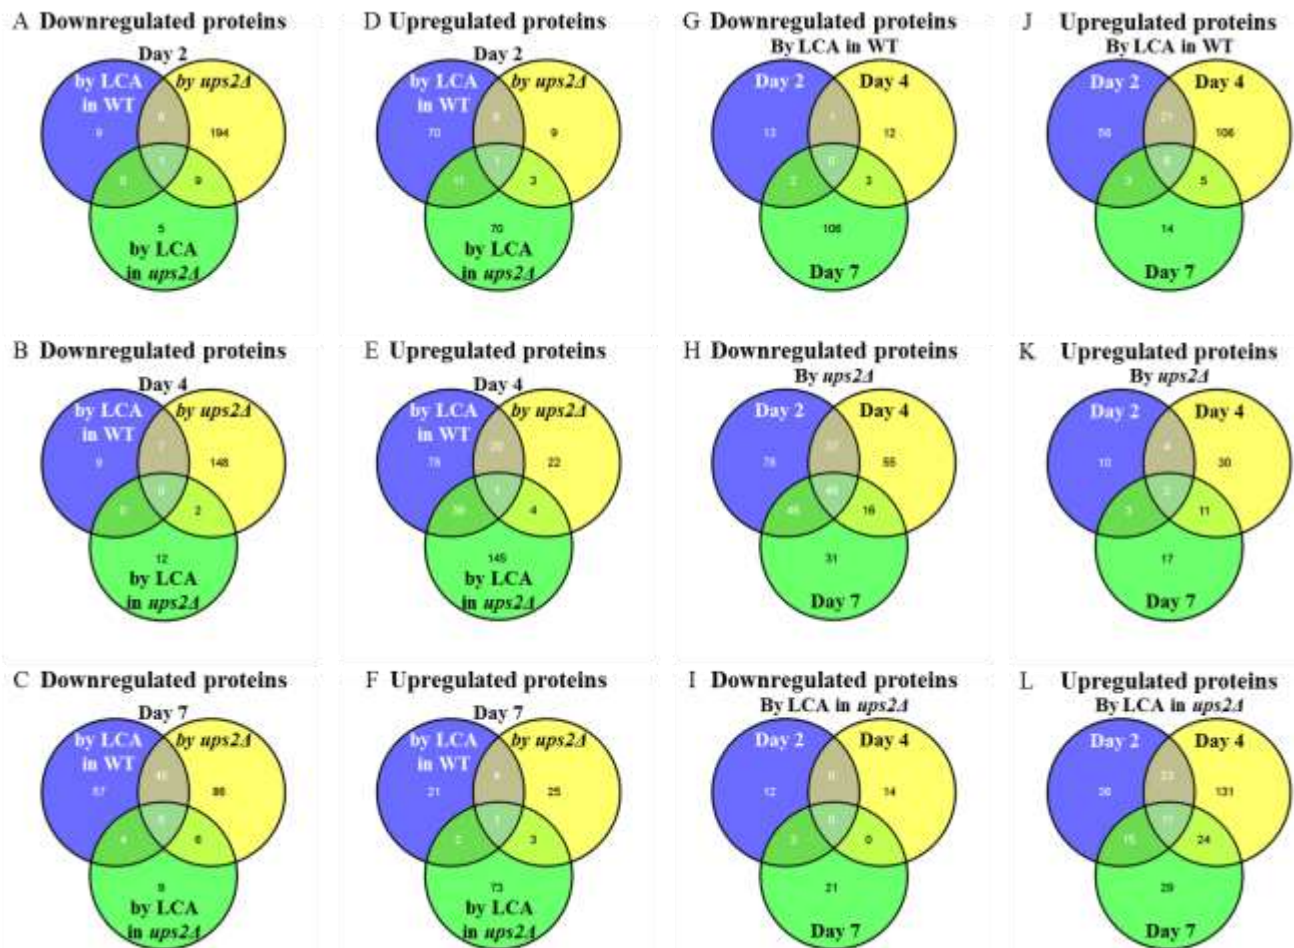

**Supplemental Figure S8. The *ups2Δ* mutation alters the concentrations of many mitochondrial proteins in yeast cultured with or without LCA.** (A – F) Venn diagrams showing a comparison of the datasets of relative concentrations of mitochondrial proteins that are statistically significantly downregulated or upregulated by LCA in WT, by the *ups2Δ* mutation in the absence of LCA, and by LCA in *ups2Δ* cells; WT cells were recovered on day 2, 4 or 7 of culturing. (G and J) Venn diagrams showing a comparison of the datasets of relative concentrations of mitochondrial proteins that are statistically significantly downregulated or upregulated by LCA in WT cells recovered on day 2, 4 or 7 of culturing. (H and K) Venn diagrams showing a comparison of the datasets of relative concentrations of mitochondrial proteins that are statistically significantly downregulated or upregulated by the *ups2Δ* mutation in the absence of LCA; *ups2Δ* cells were recovered on day 2, 4 or 7 of culturing. (I and L) Venn diagrams showing a comparison of the datasets of relative concentrations of mitochondrial proteins that are statistically significantly downregulated or upregulated by LCA in *ups2Δ* cells recovered on day 2, 4 or 7 of culturing.



**Supplemental Table S1. The relative concentrations of proteins in mitochondria purified from WT cells cultured with or without LCA.** Mitochondria were purified from WT cells recovered on day 2 of cell culturing with or without LCA. Mass spectrometry-based identification and quantitation of proteins recovered in purified mitochondria were performed as described in Materials and methods. The exponentially modified protein abundance index (emPAI) provided by the "Proteome Discoverer" software was used to calculate the relative abundance of mitochondrial proteins between specified datasets. Data on the relative concentrations of mitochondrial proteins are presented as means of 2 independent experiments.

| Accession | Description                                                                                       | Entrez Gene ID | Gene ID             | Biological Process                                                                                                            | Cellular Component                           | Molecular Function                                                           | emPAI WT | emPAI WT + LCA | Ratio WT + LCA /WT |
|-----------|---------------------------------------------------------------------------------------------------|----------------|---------------------|-------------------------------------------------------------------------------------------------------------------------------|----------------------------------------------|------------------------------------------------------------------------------|----------|----------------|--------------------|
| P01097    | ATPase inhibitor, mitochondrial [OS=Saccharomyces cerevisiae S288c]                               | 851347         | INH1; YDL181W       | metabolic process;regulation of biological process                                                                            | mitochondrion                                | catalytic activity;enzyme regulator activity;protein binding                 | 2.162    | 0.468          | 0.22               |
| P00420    | Cytochrome c oxidase subunit 3 [OS=Saccharomyces cerevisiae S288c]                                | 854627         | COX3; Q0275         | metabolic process;transport                                                                                                   | membrane;mitochondrion                       | catalytic activity;transporter activity                                      | 3.642    | 1.154          | 0.32               |
| P47084    | MIOREX complex component 12 [OS=Saccharomyces cerevisiae S288c]                                   | 853459         | MRX12; YJR003C      |                                                                                                                               | mitochondrion                                |                                                                              | 0.403    | 0.145          | 0.36               |
| P39726    | Glycine cleavage system H protein, mitochondrial [OS=Saccharomyces cerevisiae S288c]              | 851254         | GCV3; YAL044C       | metabolic process                                                                                                             | mitochondrion                                | catalytic activity                                                           | 9        | 3.642          | 0.40               |
| P07255    | Cytochrome c oxidase subunit 7A [OS=Saccharomyces cerevisiae S288c]                               | 851492         | COX9; YDL067C       | metabolic process;transport                                                                                                   | membrane;mitochondrion                       | catalytic activity;transporter activity                                      | 9        | 3.642          | 0.40               |
| Q04401    | Succinate dehydrogenase assembly factor 3, mitochondrial [OS=Saccharomyces cerevisiae S288c]      | 852123         | ACN9; SDH7; YDR511W | cell organization and biogenesis;regulation of biological process                                                             | mitochondrion;organelle lumen                |                                                                              | 0.931    | 0.389          | 0.42               |
| P49954    | probable hydrolase NIT3 [OS=Saccharomyces cerevisiae S288c]                                       | 851065         | NIT3; YLR351C       | metabolic process                                                                                                             | cytoplasm;mitochondrion                      | catalytic activity                                                           | 0.624    | 0.274          | 0.44               |
| P23180    | Probable oxidoreductase AIM17 [OS=Saccharomyces cerevisiae S288c]                                 | 856365         | AIM17; YHL021C      | cell organization and biogenesis;metabolic process                                                                            | mitochondrion                                | catalytic activity;metal ion binding                                         | 9        | 4.012          | 0.45               |
| P10507    | mitochondrial-processing peptidase subunit beta [OS=Saccharomyces cerevisiae S288c]               | 850860         | MAS1; YLR163C       | metabolic process;transport                                                                                                   | mitochondrion;organelle lumen                | catalytic activity;metal ion binding;protein binding                         | 2.481    | 1.154          | 0.47               |
| P38884    | Altered inheritance of mitochondria protein 18, mitochondrial [OS=Saccharomyces cerevisiae S288c] | 856605         | AIM18; YHR198C      |                                                                                                                               | mitochondrion                                | catalytic activity                                                           | 0.311    | 0.145          | 0.47               |
| Q03028    | Mitochondrial 2-oxodicarboxylate carrier 1 [OS=Saccharomyces cerevisiae S288c]                    | 855969         | ODC1; YPL134C       | metabolic process;transport                                                                                                   | membrane;mitochondrion                       | structural molecule activity;transporter activity                            | 7.799    | 3.642          | 0.47               |
| P00445    | Superoxide dismutase [Cu-Zn] [OS=Saccharomyces cerevisiae S288c]                                  | 853568         | SOD1; YJR104C       | cell organization and biogenesis;cellular homeostasis;metabolic process;regulation of biological process;response to stimulus | cytoplasm;cytosol;mitochondrion;nucleus      | antioxidant activity;catalytic activity;metal ion binding;protein binding    | 1.848    | 0.874          | 0.47               |
| Q06005    | Octanoyltransferase, mitochondrial [OS=Saccharomyces cerevisiae S288c]                            | 850940         | LIP2; YLR239C       | metabolic process                                                                                                             | cytoplasm;mitochondrion                      | catalytic activity                                                           | 0.245    | 0.116          | 0.47               |
| P32799    | Cytochrome c oxidase subunit 6A, mitochondrial [OS=Saccharomyces cerevisiae S288c]                | 852684         | COX13; YGL191W      | cell organization and biogenesis;metabolic process;regulation of biological process;transport                                 | membrane;mitochondrion                       | catalytic activity;enzyme regulator activity;transporter activity            | 18.953   | 9              | 0.47               |
| P38860    | GTPase MTG2, mitochondrial [OS=Saccharomyces cerevisiae S288c]                                    | 856573         | MTG2; YHR168W       | metabolic process;transport                                                                                                   | membrane;mitochondrion                       | catalytic activity;metal ion binding;nucleotide binding;transporter activity | 0.145    | 0.07           | 0.48               |
| P40008    | Protein FMP52, mitochondrial [OS=Saccharomyces                                                    | 856721         | FMP52; YER004W      |                                                                                                                               | endoplasmic reticulum;membrane;mitochondrion | catalytic activity                                                           | 2.162    | 1.054          | 0.49               |

|        |                                                                                                  |                 |                                    |                                                                                                          |                                                  |                                                                 |  |        |        |      |
|--------|--------------------------------------------------------------------------------------------------|-----------------|------------------------------------|----------------------------------------------------------------------------------------------------------|--------------------------------------------------|-----------------------------------------------------------------|--|--------|--------|------|
|        | cerevisiae S288c]                                                                                |                 |                                    |                                                                                                          |                                                  |                                                                 |  |        |        |      |
| P38172 | MIOREX complex component 3 [OS=Saccharomyces cerevisiae S288c]                                   | 852181          | YBL095W ; MRX3; YBL095W            |                                                                                                          | membrane;mitochondrion                           |                                                                 |  | 0.968  | 0.501  | 0.52 |
| P04803 | Tryptophan--tRNA ligase, mitochondrial [OS=Saccharomyces cerevisiae S288c]                       | 851861          | MSW1; YDR268 W                     | metabolic process                                                                                        | cytoplasm;mitochondrion;organelle lumen          | catalytic activity;nucleotide binding                           |  | 0.896  | 0.468  | 0.52 |
| Q04013 | Citrate/oxoglutarate carrier protein [OS=Saccharomyces cerevisiae S288c]                         | 855282          | YHM2; YMR241 W                     | cell organization and biogenesis;metabolic process;transport                                             | membrane;mitochondrion                           | DNA binding;structural molecule activity;transporter activity   |  | 3.467  | 1.818  | 0.52 |
| P28625 | Protein YIM1 [OS=Saccharomyces cerevisiae S288c]                                                 | 855183          | YIM1; YMR152 W                     | metabolic process;response to stimulus                                                                   | cytoplasm;endoplasmic reticulum;mitochondrion    | catalytic activity;metal ion binding                            |  | 0.833  | 0.438  | 0.53 |
| P00044 | Cytochrome c iso-1 [OS=Saccharomyces cerevisiae S288c]                                           | 853507          | CYC1; YJR048W                      | metabolic process;transport                                                                              | mitochondrion                                    | metal ion binding;protein binding                               |  | 12.335 | 6.499  | 0.53 |
| P40364 | Mitochondrial peculiar membrane protein 1 [OS=Saccharomyces cerevisiae S288c]                    | 853379          | MPM1; YJL066C                      |                                                                                                          | membrane;mitochondrion                           |                                                                 |  | 3.642  | 1.929  | 0.53 |
| P00447 | Superoxide dismutase [Mn], mitochondrial [OS=Saccharomyces cerevisiae S288c]                     | 856399          | SOD2; YHR008C                      | metabolic process;response to stimulus                                                                   | mitochondrion;organelle lumen                    | antioxidant activity;catalytic activity;metal ion binding       |  | 9      | 4.878  | 0.54 |
| Q03557 | Glutamyl-tRNA(Gln) amidotransferase subunit A, mitochondrial [OS=Saccharomyces cerevisiae S288c] | 855338          | HER2; YMR293C                      | cell organization and biogenesis;metabolic process                                                       | mitochondrion                                    | catalytic activity;nucleotide binding                           |  | 0.468  | 0.259  | 0.55 |
| P08525 | Cytochrome b-c1 complex subunit 8 [OS=Saccharomyces cerevisiae S288c]                            | 853273          | QCR8; YJL166W                      | metabolic process;transport                                                                              | membrane;mitochondrion                           | catalytic activity;transporter activity                         |  | 5.31   | 2.981  | 0.56 |
| P19955 | 37S ribosomal protein YMR-31, mitochondrial [OS=Saccharomyces cerevisiae S288c]                  | 850610          | YMR31; YFR049W                     | cell organization and biogenesis;metabolic process                                                       | mitochondrion;ribosome                           | catalytic activity;protein binding;structural molecule activity |  | 15.681 | 9      | 0.57 |
| Q12466 | tricalbin-1 [OS=Saccharomyces cerevisiae S288c]                                                  | 854253          | TCB1; YOR086C                      | cell organization and biogenesis;regulation of biological process                                        | endoplasmic reticulum;membrane;mitochondrion     | metal ion binding;protein binding                               |  | 0.191  | 0.11   | 0.58 |
| P33303 | Succinate/fumarate mitochondrial transporter [OS=Saccharomyces cerevisiae S288c]                 | 853558          | SFC1; YJR095W                      | metabolic process;transport                                                                              | membrane;mitochondrion                           | structural molecule activity;transporter activity               |  | 17.957 | 10.365 | 0.58 |
| P36516 | 54S ribosomal protein L3, mitochondrial [OS=Saccharomyces cerevisiae S288c]                      | 855039          | MRPL3; YMR024 W                    | cell organization and biogenesis;metabolic process;response to stimulus                                  | mitochondrion;nucleus;ribosome                   | catalytic activity;RNA binding;structural molecule activity     |  | 1.043  | 0.61   | 0.58 |
| P00359 | Glyceraldehyde-3-phosphate dehydrogenase 3 [OS=Saccharomyces cerevisiae S288c]                   | 853106          | TDH3; YGR192C                      | cell death;metabolic process                                                                             | cytoplasm;cytosol;membrane;mitochondrion;nucleus | catalytic activity;nucleotide binding;RNA binding               |  | 3.962  | 2.325  | 0.59 |
| P32907 | Ammonia transport outward protein 2 [OS=Saccharomyces cerevisiae S288c]                          | 855736          | ATO2; YNR002C                      | transport                                                                                                | membrane;mitochondrion;vacuole                   | transporter activity                                            |  | 0.874  | 0.52   | 0.59 |
| POCX55 | 40S ribosomal protein S18-A [OS=Saccharomyces cerevisiae S288c]                                  | 854982 ; 852061 | RPS18B; RPS18A; YML026C ; YDR450 W | metabolic process;transport                                                                              | cytoplasm;cytosol;mitochondrion;ribosome         | RNA binding;structural molecule activity                        |  | 0.874  | 0.52   | 0.59 |
| P25348 | 54S ribosomal protein L32, mitochondrial [OS=Saccharomyces cerevisiae S288c]                     | 850359          | MRPL32; YCR003W                    | cell organization and biogenesis;metabolic process                                                       | membrane;mitochondrion;ribosome                  | RNA binding;structural molecule activity                        |  | 0.638  | 0.389  | 0.61 |
| P53721 | Respiratory supercomplex factor 2, mitochondrial [OS=Saccharomyces cerevisiae S288c]             | 855752          | RCF2; YNR018 W                     | cell organization and biogenesis                                                                         | membrane;mitochondrion                           |                                                                 |  | 7.111  | 4.337  | 0.61 |
| Q06630 | Mitochondrial homologous recombination protein 1 [OS=Saccharomyces cerevisiae S288c]             | 851890          | MHR1; YDR296 W                     | cell organization and biogenesis;metabolic process;regulation of biological process;response to stimulus | mitochondrion;nucleus                            | catalytic activity;DNA binding;structural molecule activity     |  | 0.585  | 0.359  | 0.61 |
| Q12375 | mitochondrial ornithine transporter 1 [OS=Saccharomyces cerevisiae S288c]                        | 854297          | ORT1; YOR130C                      | metabolic process;transport                                                                              | membrane;mitochondrion                           | structural molecule activity;transporter activity               |  | 0.54   | 0.334  | 0.62 |
| P53081 | NGG1-interacting factor 3 [OS=Saccharomyces cerevisiae S288c]                                    | 852651          | NIF3; YGL221C                      |                                                                                                          | cytoplasm;mitochondrion                          |                                                                 |  | 0.501  | 0.311  | 0.62 |
| P36139 | protein PET10 [OS=Saccharomyces cerevisiae S288c]                                                | 853920          | PET10; YKR046C                     | metabolic process                                                                                        | membrane                                         |                                                                 |  | 0.413  | 0.259  | 0.63 |
| P00830 | ATP synthase subunit beta,                                                                       | 853585          | ATP2;                              | metabolic                                                                                                | cytosol;membrane;mitochondrion                   | catalytic                                                       |  | 99     | 62.096 | 0.63 |

|        |                                                                                                              |        |                        |                                                                                                                    |                                              |                                                                                |         |         |      |
|--------|--------------------------------------------------------------------------------------------------------------|--------|------------------------|--------------------------------------------------------------------------------------------------------------------|----------------------------------------------|--------------------------------------------------------------------------------|---------|---------|------|
|        | mitochondrial [OS=Saccharomyces cerevisiae S288c]                                                            |        | YJR121W                | process;transport                                                                                                  |                                              | activity;nucleotide binding;protein binding;transporter activity               |         |         |      |
| P50088 | Stationary phase gene 1 protein [OS=Saccharomyces cerevisiae S288c]                                          | 853151 | SPG1; YGR236C          |                                                                                                                    | endoplasmic reticulum;membrane;mitochondrion |                                                                                | 250.189 | 157.489 | 0.63 |
| P37292 | Serine hydroxymethyltransferase, mitochondrial [OS=Saccharomyces cerevisiae S288c]                           | 852565 | SHM1; YBR263W          | metabolic process                                                                                                  | mitochondrion                                | catalytic activity                                                             | 12.219  | 7.697   | 0.63 |
| Q01163 | 37S ribosomal protein S23, mitochondrial [OS=Saccharomyces cerevisiae S288c]                                 | 852748 | RSM23; YGL129C         | cell organization and biogenesis;metabolic process                                                                 | mitochondrion;ribosome                       | catalytic activity;nucleotide binding;RNA binding;structural molecule activity | 2.695   | 1.707   | 0.63 |
| P04806 | Hexokinase-1 [OS=Saccharomyces cerevisiae S288c]                                                             | 850614 | HXK1; YFR053C          | cellular homeostasis;metabolic process;transport                                                                   | cytoplasm;cytosol;mitochondrion              | catalytic activity;nucleotide binding                                          | 0.269   | 0.172   | 0.64 |
| P40051 | Intermediate cleaving peptidase 55 [OS=Saccharomyces cerevisiae S288c]                                       | 856811 | ICP55; YER078C         | metabolic process;regulation of biological process                                                                 | membrane;mitochondrion;nucleus               | catalytic activity;metal ion binding                                           | 0.25    | 0.16    | 0.64 |
| P47158 | Putative transferase CAF17, mitochondrial [OS=Saccharomyces cerevisiae S288c]                                | 853586 | IBA57; YJR122W         | cell organization and biogenesis;metabolic process                                                                 | mitochondrion;organelle lumen                | catalytic activity                                                             | 0.241   | 0.155   | 0.64 |
| P38714 | Arginine--tRNA ligase, mitochondrial [OS=Saccharomyces cerevisiae S288c]                                     | 856491 | MSR1; YHR091C          | cell organization and biogenesis;metabolic process                                                                 | cytoplasm;mitochondrion;organelle lumen      | catalytic activity;nucleotide binding                                          | 0.174   | 0.113   | 0.65 |
| Q96VH5 | MICOS complex subunit Mic10 [OS=Saccharomyces cerevisiae S288c]                                              | 850300 | MOS1; MIC10; YCL057C-A | cell organization and biogenesis                                                                                   | membrane;mitochondrion                       |                                                                                | 4.179   | 2.728   | 0.65 |
| Q00711 | Succinate dehydrogenase [ubiquinone] flavoprotein subunit, mitochondrial [OS=Saccharomyces cerevisiae S288c] | 853709 | SDH1; YKL148C          | metabolic process;transport                                                                                        | membrane;mitochondrion                       | catalytic activity;nucleotide binding;protein binding                          | 18.619  | 12.242  | 0.66 |
| P00431 | cytochrome c peroxidase, mitochondrial [OS=Saccharomyces cerevisiae S288c]                                   | 853940 | CCP1; YKR066C          | metabolic process;response to stimulus                                                                             | mitochondrion;organelle lumen                | antioxidant activity;catalytic activity;metal ion binding;protein binding      | 2.162   | 1.424   | 0.66 |
| P40961 | prohibitin-1 [OS=Saccharomyces cerevisiae S288c]                                                             | 853033 | PHB1; YGR132C          | cell organization and biogenesis;metabolic process;regulation of biological process                                | membrane;mitochondrion                       | protein binding                                                                | 9       | 5.952   | 0.66 |
| P39926 | Protein SSO2 [OS=Saccharomyces cerevisiae S288c]                                                             | 855221 | SSO2; YMR183C          | cell organization and biogenesis;transport                                                                         | cytoplasm;endoplasmic reticulum;membrane     | protein binding                                                                | 3.642   | 2.415   | 0.66 |
| P38072 | Protein SCO2, mitochondrial [OS=Saccharomyces cerevisiae S288c]                                              | 852312 | SCO2; YBR024W          | cell organization and biogenesis;cellular homeostasis;metabolic process;transport                                  | membrane;mitochondrion                       | antioxidant activity;catalytic activity;metal ion binding                      | 1.404   | 0.931   | 0.66 |
| P04710 | ADP,ATP carrier protein 1 [OS=Saccharomyces cerevisiae S288c]                                                | 855078 | AAC1; YMR056C          | metabolic process;transport                                                                                        | cytosol;membrane;mitochondrion               | structural molecule activity;transporter activity                              | 10.288  | 6.848   | 0.67 |
| P17695 | Glutaredoxin-2, mitochondrial [OS=Saccharomyces cerevisiae S288c]                                            | 852124 | GRX2; YDR513W          | cellular homeostasis;metabolic process;regulation of biological process;response to stimulus;transport             | cytoplasm;cytosol;mitochondrion;nucleus      | antioxidant activity;catalytic activity                                        | 1.31    | 0.874   | 0.67 |
| P14832 | peptidyl-prolyl cis-trans isomerase [OS=Saccharomyces cerevisiae S288c]                                      | 851733 | CPR1; YDR155C          | cell differentiation;cell organization and biogenesis;metabolic process;regulation of biological process;transport | cytoplasm;mitochondrion;nucleus              | catalytic activity;RNA binding                                                 | 1.31    | 0.874   | 0.67 |
| P23641 | mitochondrial phosphate carrier protein [OS=Saccharomyces cerevisiae S288c]                                  | 853540 | MIR1; YJR077C          | metabolic process;transport                                                                                        | membrane;mitochondrion                       | protein binding;structural molecule activity;transporter activity              | 26.826  | 17.957  | 0.67 |
| P25642 | 54S ribosomal protein IMG2, mitochondrial [OS=Saccharomyces cerevisiae S288c]                                | 850434 | IMG2; YCR071C          | cell organization and biogenesis;metabolic process                                                                 | mitochondrion;ribosome                       | structural molecule activity                                                   | 1.154   | 0.778   | 0.67 |
| P36151 | Uncharacterized protein YKR070W [OS=Saccharomyces cerevisiae S288c]                                          | 853944 | YKR070W ; YKR070W      | metabolic process                                                                                                  | mitochondrion                                |                                                                                | 1.976   | 1.336   | 0.68 |
| Q04487 | Mitochondrial inner membrane protein SHH3 [OS=Saccharomyces cerevisiae S288c]                                | 855145 | SHH3; YMR118C          | metabolic process                                                                                                  | membrane;mitochondrion                       | catalytic activity;metal ion binding                                           | 1.031   | 0.701   | 0.68 |
| Q12428 | Probable 2-methylcitrate dehydratase                                                                         | 856108 | PDH1; YPR002W          | metabolic process                                                                                                  | cytoplasm;membrane;mitochondrion             | catalytic activity                                                             | 19.535  | 13.33   | 0.68 |

|        |                                                                                                        |        |                  |                                                                                                                                              |                                                          |                                                                                                    |         |        |      |
|--------|--------------------------------------------------------------------------------------------------------|--------|------------------|----------------------------------------------------------------------------------------------------------------------------------------------|----------------------------------------------------------|----------------------------------------------------------------------------------------------------|---------|--------|------|
|        | [OS=Saccharomyces cerevisiae S288c]                                                                    |        |                  |                                                                                                                                              |                                                          |                                                                                                    |         |        |      |
| P10823 | Guanine nucleotide-binding protein alpha-2 subunit [OS=Saccharomyces cerevisiae S288c]                 | 856741 | GPA2; YER020W    | cell differentiation;cell growth;cell organization and biogenesis;cellular homeostasis;regulation of biological process;response to stimulus | cytosol;membrane;mitochondrion                           | catalytic activity;metal ion binding;nucleotide binding;protein binding;signal transducer activity | 0.978   | 0.668  | 0.68 |
| P07143 | Cytochrome c1, heme protein, mitochondrial [OS=Saccharomyces cerevisiae S288c]                         | 854231 | CYT1; YOR065W    | metabolic process;transport                                                                                                                  | cytosol;membrane;mitochondrion                           | metal ion binding                                                                                  | 19.309  | 13.251 | 0.69 |
| P36517 | 54S ribosomal protein L4, mitochondrial [OS=Saccharomyces cerevisiae S288c]                            | 851160 | MRPL4; YLR439W   | cell organization and biogenesis;metabolic process                                                                                           | mitochondrion;ribosome                                   | structural molecule activity                                                                       | 1.565   | 1.081  | 0.69 |
| P38523 | GrpE protein homolog, mitochondrial [OS=Saccharomyces cerevisiae S288c]                                | 854407 | MGE1; YOR232W    | metabolic process;regulation of biological process;transport                                                                                 | membrane;mitochondrion;organelle lumen                   | enzyme regulator activity;nucleotide binding;protein binding                                       | 2.36    | 1.637  | 0.69 |
| P32316 | acetyl-CoA hydrolase [OS=Saccharomyces cerevisiae S288c]                                               | 852266 | ACH1; YBL015W    | metabolic process                                                                                                                            | cytoplasm;cytosol;mitochondrion                          | catalytic activity                                                                                 | 29.539  | 20.544 | 0.70 |
| P36017 | Vacuolar protein sorting-associated protein 21 [OS=Saccharomyces cerevisiae S288c]                     | 854256 | VPS21; YOR089C   | cell organization and biogenesis;regulation of biological process;response to stimulus;transport                                             | cytosol;endosome;membrane;mitochondrion                  | catalytic activity;nucleotide binding                                                              | 0.719   | 0.501  | 0.70 |
| P32860 | NifU-like protein, mitochondrial [OS=Saccharomyces cerevisiae S288c]                                   | 853826 | NFU1; YKL040C    | cell organization and biogenesis;cellular homeostasis;metabolic process                                                                      | mitochondrion;organelle lumen                            | metal ion binding                                                                                  | 5.494   | 3.87   | 0.70 |
| P38122 | 3-methyl-2-oxobutanoate hydroxymethyltransferase [OS=Saccharomyces cerevisiae S288c]                   | 852474 | ECM31; YBR176W   | metabolic process                                                                                                                            | mitochondrion                                            | catalytic activity                                                                                 | 0.585   | 0.413  | 0.71 |
| P00425 | Cytochrome c oxidase polypeptide 5B, mitochondrial [OS=Saccharomyces cerevisiae S288c]                 | 854695 | COX5B; YIL111W   | metabolic process;transport                                                                                                                  | membrane;mitochondrion                                   | catalytic activity;transporter activity                                                            | 1.848   | 1.31   | 0.71 |
| P06168 | ketol-acid reductoisomerase, mitochondrial [OS=Saccharomyces cerevisiae S288c]                         | 851069 | ILV5; YLR355C    | cell organization and biogenesis;metabolic process                                                                                           | mitochondrion                                            | catalytic activity;DNA binding;metal ion binding                                                   | 28.126  | 19.962 | 0.71 |
| P00358 | glyceraldehyde-3-phosphate dehydrogenase 2 [OS=Saccharomyces cerevisiae S288c]                         | 853465 | TDH2; YJR009C    | cell death;metabolic process                                                                                                                 | cytoplasm;cytosol;membrane;mitochondrion;nucleus         | catalytic activity;nucleotide binding;protein binding                                              | 1.721   | 1.228  | 0.71 |
| P32340 | Rotenone-insensitive NADH-ubiquinone oxidoreductase, mitochondrial [OS=Saccharomyces cerevisiae S288c] | 854919 | ND1; YML120C     | metabolic process;regulation of biological process                                                                                           | membrane;mitochondrion;organelle lumen                   | catalytic activity;nucleotide binding                                                              | 22.95   | 16.433 | 0.72 |
| P09950 | 5-aminolevulinic acid synthase, mitochondrial [OS=Saccharomyces cerevisiae S288c]                      | 851818 | HEM1; YDR232W    | metabolic process                                                                                                                            | mitochondrion;organelle lumen                            | catalytic activity                                                                                 | 0.389   | 0.28   | 0.72 |
| P81449 | ATP synthase subunit e, mitochondrial [OS=Saccharomyces cerevisiae S288c]                              | 851922 | TIM11; YDR322C-A | cell organization and biogenesis;metabolic process;transport                                                                                 | membrane;mitochondrion                                   | catalytic activity;structural molecule activity;transporter activity                               | 9       | 6.499  | 0.72 |
| P08425 | phenylalanine--tRNA ligase, mitochondrial [OS=Saccharomyces cerevisiae S288c]                          | 856160 | MSF1; YPR047W    | metabolic process                                                                                                                            | cytoplasm;mitochondrion;organelle lumen                  | catalytic activity;metal ion binding;nucleotide binding;RNA binding                                | 0.346   | 0.25   | 0.72 |
| P19882 | heat shock protein 60, mitochondrial [OS=Saccharomyces cerevisiae S288c]                               | 850963 | HSP60; YLR259C   | cell organization and biogenesis;metabolic process;regulation of biological process;transport                                                | cytoplasm;cytosol;membrane;mitochondrion;organelle lumen | catalytic activity;DNA binding;nucleotide binding;protein binding                                  | 23.816  | 17.33  | 0.73 |
| P18239 | ADP,ATP carrier protein 2 [OS=Saccharomyces cerevisiae S288c]                                          | 852250 | PET9; YBL030C    | cell death;metabolic process;transport                                                                                                       | membrane;mitochondrion                                   | structural molecule activity;transporter activity                                                  | 135.887 | 99     | 0.73 |
| Q04438 | Stationary phase protein 4 [OS=Saccharomyces cerevisiae S288c]                                         | 855134 | SPG4; YMR107W    |                                                                                                                                              |                                                          |                                                                                                    | 4.995   | 3.642  | 0.73 |
| P32317 | Protein AFG1 [OS=Saccharomyces cerevisiae S288c]                                                       | 856658 | AFG1; YEL052W    | cell organization and biogenesis;metabolic process;response to stimulus;transport                                                            | membrane;mitochondrion                                   | catalytic activity;nucleotide binding                                                              | 1.154   | 0.848  | 0.73 |
| Q06892 | NADH kinase POSS, mitochondrial [OS=Saccharomyces cerevisiae S288c]                                    | 855913 | POSS; YPL188W    | metabolic process;response to stimulus                                                                                                       | mitochondrion;organelle lumen                            | catalytic activity;nucleotide binding                                                              | 2.511   | 1.848  | 0.74 |
| P32445 | Single-stranded DNA-binding protein RIM1, mitochondrial [OS=Saccharomyces                              | 850395 | RIM1; YCR028C-A  | cell organization and biogenesis;metabolic process;regulation of                                                                             | mitochondrion                                            | DNA binding                                                                                        | 6.743   | 4.995  | 0.74 |

|        |                                                                                                                 |        |                   |                                                                                            |                                          |                                                                         |        |        |      |
|--------|-----------------------------------------------------------------------------------------------------------------|--------|-------------------|--------------------------------------------------------------------------------------------|------------------------------------------|-------------------------------------------------------------------------|--------|--------|------|
|        | cerevisiae S288c]                                                                                               |        |                   | biological process                                                                         |                                          |                                                                         |        |        |      |
| Q01217 | Protein ARG5,6, mitochondrial [OS=Saccharomyces cerevisiae S288c]                                               | 856800 | ARG5,6; YER069W   | metabolic process;regulation of biological process                                         | cytoplasm;mitochondrion;organelle lumen  | catalytic activity;nucleotide binding;protein binding                   | 0.458  | 0.341  | 0.74 |
| P00401 | Cytochrome c oxidase subunit 1 [OS=Saccharomyces cerevisiae S288c]                                              | 854598 | COX1; Q0045       | metabolic process;transport                                                                | membrane;mitochondrion                   | catalytic activity;metal ion binding;transporter activity               | 2.162  | 1.61   | 0.74 |
| P43617 | Uncharacterized mitochondrial carrier YFR045W [OS=Saccharomyces cerevisiae S288c]                               | 850606 | YFR045W ; YFR045W | metabolic process;transport                                                                | membrane;mitochondrion                   | structural molecule activity;transporter activity                       | 0.778  | 0.585  | 0.75 |
| P32898 | Mitochondrial presequence protease [OS=Saccharomyces cerevisiae S288c]                                          | 852041 | CYM1; YDR430C     | metabolic process                                                                          | mitochondrion                            | catalytic activity;metal ion binding                                    | 2.162  | 1.626  | 0.75 |
| P21801 | Succinate dehydrogenase [ubiquinone] iron-sulfur subunit, mitochondrial [OS=Saccharomyces cerevisiae S288c]     | 850685 | SDH2; YLL041C     | metabolic process;transport                                                                | membrane;mitochondrion                   | catalytic activity;metal ion binding                                    | 32.839 | 24.809 | 0.76 |
| P15179 | Aspartate-tRNA ligase, mitochondrial [OS=Saccharomyces cerevisiae S288c]                                        | 856000 | MSD1; YPL104W     | metabolic process                                                                          | cytoplasm;mitochondrion;organelle lumen  | catalytic activity;nucleotide binding                                   | 0.708  | 0.535  | 0.76 |
| Q12031 | Mitochondrial 2-methylisocitrate lyase [OS=Saccharomyces cerevisiae S288c]                                      | 856114 | ICL2; YPR006C     | metabolic process                                                                          | mitochondrion;organelle lumen            | catalytic activity                                                      | 7.859  | 5.952  | 0.76 |
| P40047 | Aldehyde dehydrogenase 5, mitochondrial [OS=Saccharomyces cerevisiae S288c]                                     | 856804 | ALD5; YER073W     | metabolic process                                                                          | mitochondrion;organelle lumen            | catalytic activity                                                      | 3.146  | 2.384  | 0.76 |
| P40341 | Mitochondrial respiratory chain complexes assembly protein YTA12 [OS=Saccharomyces cerevisiae S288c]            | 855114 | YTA12; YMR089C    | cell organization and biogenesis;metabolic process;response to stimulus;transport          | cytoplasm;membrane;mitochondrion         | catalytic activity;metal ion binding;nucleotide binding;protein binding | 1.795  | 1.371  | 0.76 |
| P25605 | Acetolactate synthase small subunit, mitochondrial [OS=Saccharomyces cerevisiae S288c]                          | 850348 | ILV6; YCL009C     | metabolic process;regulation of biological process                                         | mitochondrion                            | catalytic activity;enzyme regulator activity                            | 11.743 | 9      | 0.77 |
| P40185 | Protein mmf1, mitochondrial [OS=Saccharomyces cerevisiae S288c]                                                 | 854760 | MMF1; YIL051C     | cell organization and biogenesis;metabolic process                                         | mitochondrion;organelle lumen            |                                                                         | 9      | 6.943  | 0.77 |
| P36060 | NADH-cytochrome b5 reductase 2 [OS=Saccharomyces cerevisiae S288c]                                              | 853707 | MCR1; YKL150W     | metabolic process;response to stimulus                                                     | membrane;mitochondrion                   | catalytic activity;protein binding                                      | 19.691 | 15.238 | 0.77 |
| P37293 | N-terminal acetyltransferase 2 [OS=Saccharomyces cerevisiae S288c]                                              | 853050 | NAT2; YGR147C     | metabolic process                                                                          | cytoplasm;mitochondrion                  | catalytic activity                                                      | 0.931  | 0.73   | 0.78 |
| Q07651 | SUR7 family protein FMP45 [OS=Saccharomyces cerevisiae S288c]                                                   | 851304 | FMP45; YDL222C    | cell differentiation;cell organization and biogenesis                                      | membrane;mitochondrion                   |                                                                         | 3.125  | 2.455  | 0.79 |
| P38797 | Protein phosphatase 2C homolog 7, mitochondrial [OS=Saccharomyces cerevisiae S288c]                             | 856475 | PTC7; YHR076 W    | metabolic process                                                                          | mitochondrion                            | catalytic activity;metal ion binding;protein binding                    | 0.874  | 0.688  | 0.79 |
| P00360 | glyceraldehyde-3-phosphate dehydrogenase 1 [OS=Saccharomyces cerevisiae S288c]                                  | 853395 | TDH1; YIL052W     | metabolic process                                                                          | cytoplasm;cytosol;membrane;mitochondrion | catalytic activity;nucleotide binding                                   | 0.823  | 0.65   | 0.79 |
| P53312 | Succinyl-CoA ligase [ADP-forming] subunit beta, mitochondrial [OS=Saccharomyces cerevisiae S288c]               | 853159 | LSC2; YGR244C     | metabolic process                                                                          | mitochondrion                            | catalytic activity;nucleotide binding                                   | 20.017 | 15.819 | 0.79 |
| P07253 | cytochrome B pre-mRNA-processing protein 6 [OS=Saccharomyces cerevisiae S288c]                                  | 852417 | CBP6; YBR120C     | cell organization and biogenesis;metabolic process;regulation of biological process        | mitochondrion;ribosome                   |                                                                         | 2.728  | 2.162  | 0.79 |
| P00175 | Cytochrome b2, mitochondrial [OS=Saccharomyces cerevisiae S288c]                                                | 854950 | CYB2; YML054C     | metabolic process;transport                                                                | cytosol;membrane;mitochondrion;nucleus   | catalytic activity;metal ion binding;nucleotide binding                 | 1.113  | 0.884  | 0.79 |
| P25646 | [Pyruvate dehydrogenase (acetyl-transferring)]-phosphatase 2, mitochondrial [OS=Saccharomyces cerevisiae S288c] | 850441 | PTC6; YCR079W     | cell communication;metabolic process;regulation of biological process;response to stimulus | mitochondrion;organelle lumen            | catalytic activity                                                      | 0.61   | 0.487  | 0.80 |
| P00560 | Phosphoglycerate kinase [OS=Saccharomyces cerevisiae S288c]                                                     | 850370 | PGK1; YCR012W     | metabolic process                                                                          | cytoplasm;membrane;mitochondrion         | catalytic activity;nucleotide binding                                   | 2.415  | 1.929  | 0.80 |
| P38891 | Branched-chain-amino-acid aminotransferase, mitochondrial [OS=Saccharomyces                                     | 856615 | BAT1; YHR208 W    | metabolic process;regulation of biological process;response to                             | mitochondrion;organelle lumen            | catalytic activity                                                      | 15.876 | 12.689 | 0.80 |

|        |                                                                                                                |        |                  |                                                                                                                              |                                                               |                                                                                                    |        |        |      |
|--------|----------------------------------------------------------------------------------------------------------------|--------|------------------|------------------------------------------------------------------------------------------------------------------------------|---------------------------------------------------------------|----------------------------------------------------------------------------------------------------|--------|--------|------|
|        | cerevisiae S288c]                                                                                              |        |                  | stimulus                                                                                                                     |                                                               |                                                                                                    |        |        |      |
| P47052 | succinate dehydrogenase [ubiquinone] flavoprotein subunit 2, mitochondrial [OS=Saccharomyces cerevisiae S288c] | 853405 | YJL045W; YJL045W | metabolic process;transport                                                                                                  | membrane;mitochondrion                                        | catalytic activity;nucleotide binding                                                              | 5.884  | 4.712  | 0.80 |
| P32891 | D-lactate dehydrogenase [cytochrome] 1, mitochondrial [OS=Saccharomyces cerevisiae S288c]                      | 851380 | DLD1; YDL174C    | metabolic process;transport                                                                                                  | membrane;mitochondrion                                        | catalytic activity;nucleotide binding                                                              | 13.03  | 10.45  | 0.80 |
| P53736 | Uncharacterized protein YNR040W [OS=Saccharomyces cerevisiae S288c]                                            | 855776 | YNR040W; YNR040W |                                                                                                                              | mitochondrion                                                 |                                                                                                    | 1.154  | 0.931  | 0.81 |
| P36059 | ATP-dependent (S)-NAD(P)H-hydrate dehydratase [OS=Saccharomyces cerevisiae S288c]                              | 853706 | YKL151C; YKL151C | metabolic process                                                                                                            | cytoplasm                                                     | catalytic activity;nucleotide binding                                                              | 1.081  | 0.874  | 0.81 |
| P23833 | Protein SCO1, mitochondrial [OS=Saccharomyces cerevisiae S288c]                                                | 852325 | SCO1; YBR037C    | cell organization and biogenesis;cellular homeostasis;response to stimulus;transport                                         | membrane;mitochondrion                                        | antioxidant activity;catalytic activity;metal ion binding                                          | 1.783  | 1.448  | 0.81 |
| P33416 | Heat shock protein 78, mitochondrial [OS=Saccharomyces cerevisiae S288c]                                       | 851845 | HSP78; YDR258C   | cell organization and biogenesis;metabolic process;regulation of biological process;response to stimulus                     | mitochondrion;organelle lumen                                 | catalytic activity;nucleotide binding;protein binding                                              | 12.525 | 10.199 | 0.81 |
| P43635 | Citrate synthase 3, mitochondrial [OS=Saccharomyces cerevisiae S288c]                                          | 856107 | CIT3; YPR001W    | metabolic process                                                                                                            | mitochondrion                                                 | catalytic activity                                                                                 | 6.11   | 4.995  | 0.82 |
| P12686 | 37S ribosomal protein MRP13, mitochondrial [OS=Saccharomyces cerevisiae S288c]                                 | 852975 | MRP13; YGR084C   | cell organization and biogenesis;metabolic process                                                                           | mitochondrion;ribosome                                        | structural molecule activity                                                                       | 1.512  | 1.239  | 0.82 |
| P07251 | ATP synthase subunit alpha, mitochondrial [OS=Saccharomyces cerevisiae S288c]                                  | 852177 | ATP1; YBL099W    | metabolic process;transport                                                                                                  | cytosol;membrane;mitochondrion                                | catalytic activity;nucleotide binding;transporter activity                                         | 34.938 | 28.663 | 0.82 |
| P53219 | Abhydrolase domain-containing protein IMO32 [OS=Saccharomyces cerevisiae S288c]                                | 852919 | IMO32; YGR031W   | metabolic process;transport                                                                                                  | mitochondrion                                                 | catalytic activity                                                                                 | 1.404  | 1.154  | 0.82 |
| P00924 | Enolase 1 [OS=Saccharomyces cerevisiae S288c]                                                                  | 853169 | ENO1; YGR254W    | metabolic process;regulation of biological process                                                                           | cytoplasm;cytosol;membrane;mitochondrion;vacuole              | catalytic activity;metal ion binding;protein binding                                               | 0.711  | 0.585  | 0.82 |
| P08539 | Guanine nucleotide-binding protein alpha-1 subunit [OS=Saccharomyces cerevisiae S288c]                         | 856394 | GPA1; YHR005C    | cell organization and biogenesis;cellular component movement;regulation of biological process;response to stimulus;transport | cytosol;endosome;membrane                                     | catalytic activity;metal ion binding;nucleotide binding;protein binding;signal transducer activity | 0.682  | 0.562  | 0.82 |
| P32902 | 37S ribosomal protein MRP4, mitochondrial [OS=Saccharomyces cerevisiae S288c]                                  | 856384 | MRP4; YHL004W    | cell organization and biogenesis;metabolic process                                                                           | mitochondrion;ribosome                                        | structural molecule activity                                                                       | 1.154  | 0.957  | 0.83 |
| P18496 | Mitochondrial ATPase complex subunit ATP10 [OS=Saccharomyces cerevisiae S288c]                                 | 851109 | ATP10; YLR393W   | cell organization and biogenesis                                                                                             | cytoplasm;membrane;mitochondrion                              | protein binding                                                                                    | 1.818  | 1.512  | 0.83 |
| P21560 | Protein CBP3, mitochondrial [OS=Saccharomyces cerevisiae S288c]                                                | 855886 | CBP3; YPL215W    | cell organization and biogenesis;regulation of biological process                                                            | membrane;mitochondrion;ribosome                               |                                                                                                    | 1.031  | 0.859  | 0.83 |
| P35191 | DnaJ homolog 1, mitochondrial [OS=Saccharomyces cerevisiae S288c]                                              | 850530 | MDJ1; YFL016C    | cell organization and biogenesis;metabolic process;regulation of biological process;response to stimulus                     | mitochondrion;organelle lumen                                 | enzyme regulator activity;metal ion binding;nucleotide binding;protein binding                     | 4.722  | 3.977  | 0.84 |
| P49095 | Glycine dehydrogenase (Decarboxylating), mitochondrial [OS=Saccharomyces cerevisiae S288c]                     | 855227 | GCV2; YMR189W    | metabolic process                                                                                                            | cytosol;mitochondrion                                         | catalytic activity                                                                                 | 2.884  | 2.433  | 0.84 |
| P33310 | ATP-dependent permease MDL1, mitochondrial [OS=Saccharomyces cerevisiae S288c]                                 | 850885 | MDL1; YLR188W    | transport                                                                                                                    | membrane;mitochondrion                                        | catalytic activity;nucleotide binding;transporter activity                                         | 0.624  | 0.528  | 0.85 |
| Q01574 | acetyl-coenzyme A synthetase 1 [OS=Saccharomyces cerevisiae S288c]                                             | 851245 | ACS1; YAL054C    | cell organization and biogenesis;metabolic process                                                                           | cytoplasm;cytosol;endoplasmic reticulum;mitochondrion;nucleus | catalytic activity;nucleotide binding                                                              | 0.624  | 0.528  | 0.85 |
| P53170 | [Pyruvate dehydrogenase (acetyl-transferring)] kinase 2, mitochondrial [OS=Saccharomyces                       | 852821 | PKP2; YGL059W    | metabolic process;regulation of biological process                                                                           | mitochondrion;organelle lumen                                 | catalytic activity;nucleotide binding;protein binding                                              | 1.096  | 0.931  | 0.85 |

|        |                                                                                                  |        |                             |                                                                                                                    |                                                                |                                                                                     |        |        |      |
|--------|--------------------------------------------------------------------------------------------------|--------|-----------------------------|--------------------------------------------------------------------------------------------------------------------|----------------------------------------------------------------|-------------------------------------------------------------------------------------|--------|--------|------|
|        | cerevisiae S288c]                                                                                |        |                             |                                                                                                                    |                                                                |                                                                                     |        |        |      |
| P23291 | Casein kinase I homolog 1<br>[OS=Saccharomyces cerevisiae S288c]                                 | 856537 | YCK1;<br>YHR135C            | cell organization and biogenesis;metabolic process;regulation of biological process;response to stimulus;transport | cytoplasm;endoplasmic reticulum;membrane;mitochondrion;nucleus | catalytic activity;nucleotide binding;protein binding                               | 1.043  | 0.887  | 0.85 |
| P00925 | Enolase 2<br>[OS=Saccharomyces cerevisiae S288c]                                                 | 856579 | ENO2;<br>YHR174<br>W        | metabolic process;regulation of biological process                                                                 | cytoplasm;cytosol;membrane;mitochondrion;vacuole               | catalytic activity;metal ion binding;protein binding                                | 1.043  | 0.887  | 0.85 |
| Q06678 | 54S ribosomal protein L35, mitochondrial<br>[OS=Saccharomyces cerevisiae S288c]                  | 851921 | MRPL35;<br>YDR322<br>W      | cell organization and biogenesis;metabolic process                                                                 | mitochondrion;ribosome                                         | structural molecule activity                                                        | 1.424  | 1.219  | 0.86 |
| P25349 | Flavoprotein-like protein YCP4<br>[OS=Saccharomyces cerevisiae S288c]                            | 850360 | YCP4;<br>YCR004C            | metabolic process;regulation of biological process                                                                 | cytoplasm;membrane;mitochondrion                               | catalytic activity;nucleotide binding;protein binding                               | 6.743  | 5.813  | 0.86 |
| P53252 | sphingolipid long chain base-responsive protein PIL1<br>[OS=Saccharomyces cerevisiae S288c]      | 852977 | PIL1;<br>YGR086C            | cell organization and biogenesis;regulation of biological process;response to stimulus;transport                   | cytoplasm;membrane;mitochondrion                               | protein binding                                                                     | 14.013 | 12.111 | 0.86 |
| P40086 | Cytochrome c oxidase assembly protein cox15<br>[OS=Saccharomyces cerevisiae S288c]               | 856884 | COX15;<br>YER141W           | cell organization and biogenesis;metabolic process;transport                                                       | membrane;mitochondrion                                         | catalytic activity;transporter activity                                             | 1.555  | 1.346  | 0.87 |
| P09457 | ATP synthase subunit 5, mitochondrial<br>[OS=Saccharomyces cerevisiae S288c]                     | 851892 | ATP5;<br>YDR298C            | metabolic process;transport                                                                                        | membrane;mitochondrion                                         | catalytic activity;transporter activity                                             | 9      | 7.799  | 0.87 |
| P46367 | Potassium-activated aldehyde dehydrogenase, mitochondrial<br>[OS=Saccharomyces cerevisiae S288c] | 854556 | ALD4;<br>YOR374<br>W        | metabolic process                                                                                                  | mitochondrion;organelle lumen                                  | catalytic activity                                                                  | 58.078 | 50.795 | 0.87 |
| P04840 | Mitochondrial outer membrane protein porin 1<br>[OS=Saccharomyces cerevisiae S288c]              | 855669 | POR1;<br>YNL055C            | cell death;cell organization and biogenesis;cellular homeostasis;regulation of biological process;transport        | cytoplasm;membrane;mitochondrion                               | transporter activity                                                                | 15.238 | 13.384 | 0.88 |
| P28241 | Isocitrate dehydrogenase [NAD] subunit 2, mitochondrial<br>[OS=Saccharomyces cerevisiae S288c]   | 854303 | IDH2;<br>YOR136<br>W        | metabolic process                                                                                                  | mitochondrion;organelle lumen                                  | catalytic activity;metal ion binding;nucleotide binding;protein binding;RNA binding | 6.197  | 5.449  | 0.88 |
| P50085 | Prohibitin-2<br>[OS=Saccharomyces cerevisiae S288c]                                              | 853146 | PHB2;<br>YGR231C            | cell organization and biogenesis;metabolic process;regulation of biological process                                | membrane;mitochondrion                                         | protein binding                                                                     | 4.926  | 4.337  | 0.88 |
| P07246 | Alcohol dehydrogenase 3, mitochondrial<br>[OS=Saccharomyces cerevisiae S288c]                    | 855107 | ADH3;<br>YMR083<br>W        | metabolic process                                                                                                  | mitochondrion;organelle lumen                                  | catalytic activity;metal ion binding                                                | 10.159 | 9      | 0.89 |
| P46681 | D-lactate dehydrogenase [cytochrome] 2, mitochondrial<br>[OS=Saccharomyces cerevisiae S288c]     | 851376 | DLD2;<br>YDL178W            | metabolic process                                                                                                  | mitochondrion;organelle lumen                                  | catalytic activity;nucleotide binding;protein binding                               | 1.829  | 1.626  | 0.89 |
| P40495 | Homoisocitrate dehydrogenase, mitochondrial<br>[OS=Saccharomyces cerevisiae S288c]               | 854714 | LYS12;<br>YIL094C           | metabolic process                                                                                                  | mitochondrion                                                  | catalytic activity;metal ion binding;nucleotide binding                             | 6.499  | 5.813  | 0.89 |
| P17505 | Malate dehydrogenase, mitochondrial<br>[OS=Saccharomyces cerevisiae S288c]                       | 853777 | MDH1;<br>YKL085W            | metabolic process                                                                                                  | mitochondrion;organelle lumen                                  | catalytic activity;protein binding;RNA binding                                      | 99     | 88.615 | 0.90 |
| P48015 | Aminomethyltransferase, mitochondrial<br>[OS=Saccharomyces cerevisiae S288c]                     | 851582 | GCV1;<br>YDR019C            | metabolic process                                                                                                  | mitochondrion                                                  | catalytic activity;protein binding                                                  | 11.217 | 10.053 | 0.90 |
| P53326 | Uncharacterized protein YGR266W<br>[OS=Saccharomyces cerevisiae S288c]                           | 853182 | YGR266<br>W;<br>YGR266<br>W |                                                                                                                    | membrane;mitochondrion                                         |                                                                                     | 1.081  | 0.974  | 0.90 |
| P33311 | ATP-dependent permease MDL2, mitochondrial<br>[OS=Saccharomyces cerevisiae S288c]                | 855858 | MDL2;<br>YPL270W            | response to stimulus;transport                                                                                     | membrane;mitochondrion                                         | catalytic activity;nucleotide binding;transporter activity                          | 1.233  | 1.116  | 0.91 |
| P20967 | 2-oxoglutarate dehydrogenase, mitochondrial<br>[OS=Saccharomyces cerevisiae S288c]               | 854681 | KGD1;<br>YIL125W            | metabolic process                                                                                                  | cytosol;mitochondrion;organelle lumen                          | catalytic activity                                                                  | 13.785 | 12.554 | 0.91 |
| P36013 | NAD-dependent malic enzyme, mitochondrial<br>[OS=Saccharomyces                                   | 853839 | MAE1;<br>YKL029C            | metabolic process                                                                                                  | mitochondrion;organelle lumen                                  | catalytic activity;metal ion binding;nucleotide                                     | 2.35   | 2.162  | 0.92 |

|        |                                                                                                                      |        |                |                                                                                                  |                                                 |                                                                                     |        |        |      |
|--------|----------------------------------------------------------------------------------------------------------------------|--------|----------------|--------------------------------------------------------------------------------------------------|-------------------------------------------------|-------------------------------------------------------------------------------------|--------|--------|------|
|        | cerevisiae S288c]                                                                                                    |        |                |                                                                                                  |                                                 | binding                                                                             |        |        |      |
| Q12166 | 2-isopropylmalate synthase 2, mitochondrial [OS=Saccharomyces cerevisiae S288c]                                      | 854275 | LEU9; YOR108W  | metabolic process                                                                                | mitochondrion                                   | catalytic activity;protein binding                                                  | 3.739  | 3.453  | 0.92 |
| P16387 | Pyruvate dehydrogenase E1 component subunit alpha, mitochondrial [OS=Saccharomyces cerevisiae S288c]                 | 856925 | PDA1; YER178W  | cell growth;metabolic process                                                                    | mitochondrion;organelle lumen                   | catalytic activity                                                                  | 25.264 | 23.384 | 0.93 |
| P00927 | Threonine dehydratase, mitochondrial [OS=Saccharomyces cerevisiae S288c]                                             | 856819 | ILV1; YER086W  | metabolic process                                                                                | cytoplasm;mitochondrion                         | catalytic activity                                                                  | 3.375  | 3.125  | 0.93 |
| P32795 | Mitochondrial inner membrane i-AAA protease supercomplex subunit YME1 [OS=Saccharomyces cerevisiae S288c]            | 856135 | YME1; YPR024W  | metabolic process;response to stimulus;transport                                                 | membrane;mitochondrion                          | catalytic activity;metal ion binding;nucleotide binding;protein binding             | 1.938  | 1.798  | 0.93 |
| P39522 | Dihydroxy-acid dehydratase, mitochondrial [OS=Saccharomyces cerevisiae S288c]                                        | 853473 | ILV3; YJR016C  | metabolic process                                                                                | mitochondrion                                   | catalytic activity;metal ion binding                                                | 39.37  | 36.649 | 0.93 |
| Q08179 | Mitochondrial distribution and morphology protein 38 [OS=Saccharomyces cerevisiae S288c]                             | 854130 | MDM38; YOL027C | cell organization and biogenesis;cellular homeostasis;regulation of biological process;transport | membrane;mitochondrion                          |                                                                                     | 5.683  | 5.31   | 0.93 |
| P19657 | plasma membrane ATPase 2 [OS=Saccharomyces cerevisiae S288c]                                                         | 856071 | PMA2; YPL036W  | cellular homeostasis;metabolic process;transport                                                 | membrane;mitochondrion                          | catalytic activity;metal ion binding;nucleotide binding;transporter activity        | 9      | 8.427  | 0.94 |
| P40053 | Altered inheritance of mitochondria protein 9, mitochondrial [OS=Saccharomyces cerevisiae S288c]                     | 856813 | AIM9; YER080W  |                                                                                                  | mitochondrion                                   |                                                                                     | 4.289  | 4.036  | 0.94 |
| P32191 | Glycerol-3-phosphate dehydrogenase, mitochondrial [OS=Saccharomyces cerevisiae S288c]                                | 854651 | GUT2; YIL155C  | metabolic process                                                                                | membrane;mitochondrion                          | catalytic activity                                                                  | 9.502  | 9      | 0.95 |
| P32843 | Mitochondrial escape protein 2 [OS=Saccharomyces cerevisiae S288c]                                                   | 855348 | YME2; YMR302C  | cell organization and biogenesis;metabolic process                                               | membrane;mitochondrion                          | nucleotide binding;RNA binding                                                      | 3.112  | 2.949  | 0.95 |
| P19414 | Aconitate hydratase, mitochondrial [OS=Saccharomyces cerevisiae S288c]                                               | 851013 | ACO1; YLR304C  | cell organization and biogenesis;metabolic process;transport                                     | cytoplasm;cytosol;mitochondrion;organelle lumen | catalytic activity;DNA binding;metal ion binding                                    | 66.002 | 66.002 | 1.00 |
| POCS90 | Heat shock protein SSC1, mitochondrial [OS=Saccharomyces cerevisiae S288c]                                           | 853503 | SSC1; YJR045C  | cell organization and biogenesis;metabolic process;regulation of biological process;transport    | membrane;mitochondrion;nucleus;organelle lumen  | catalytic activity;enzyme regulator activity;nucleotide binding;protein binding     | 51.75  | 51.75  | 1.00 |
| P09624 | Dihydrolipoyl dehydrogenase, mitochondrial [OS=Saccharomyces cerevisiae S288c]                                       | 850527 | LPD1; YFL018C  | cellular homeostasis;metabolic process;regulation of biological process                          | mitochondrion;organelle lumen                   | catalytic activity;nucleotide binding                                               | 30.623 | 30.623 | 1.00 |
| Q07500 | External NADH-ubiquinone oxidoreductase 2, mitochondrial [OS=Saccharomyces cerevisiae S288c]                         | 851474 | NDE2; YDL085W  | metabolic process                                                                                | mitochondrion                                   | catalytic activity;nucleotide binding                                               | 12.594 | 12.594 | 1.00 |
| P00890 | citrate synthase, mitochondrial [OS=Saccharomyces cerevisiae S288c]                                                  | 855732 | CIT1; YNR001C  | metabolic process;transport                                                                      | cytosol;mitochondrion;organelle lumen           | catalytic activity                                                                  | 11.798 | 11.798 | 1.00 |
| P07275 | Delta-1-pyrroline-5-carboxylate dehydrogenase, mitochondrial [OS=Saccharomyces cerevisiae S288c]                     | 856432 | PUT2; YHR037W  | metabolic process                                                                                | membrane;mitochondrion;organelle lumen          | catalytic activity                                                                  | 6.565  | 6.565  | 1.00 |
| P28834 | Isocitrate dehydrogenase [NAD] subunit 1, mitochondrial [OS=Saccharomyces cerevisiae S288c]                          | 855691 | IDH1; YNL037C  | metabolic process;transport                                                                      | cytosol;mitochondrion;organelle lumen           | catalytic activity;metal ion binding;nucleotide binding;protein binding;RNA binding | 15.238 | 15.238 | 1.00 |
| Q08822 | Probable electron transfer flavoprotein-ubiquinone oxidoreductase, mitochondrial [OS=Saccharomyces cerevisiae S288c] | 854538 | CIR2; YOR356W  | metabolic process;transport                                                                      | membrane;mitochondrion                          | catalytic activity;metal ion binding;nucleotide binding                             | 3.019  | 3.019  | 1.00 |
| P32473 | Pyruvate dehydrogenase E1 component subunit beta, mitochondrial [OS=Saccharomyces                                    | 852522 | PDB1; YBR221C  | metabolic process                                                                                | mitochondrion;organelle lumen                   | catalytic activity                                                                  | 10.288 | 10.288 | 1.00 |



|        |                                                                                                     |        |                        |                                                                                              |                                                        |                                                                           |        |        |      |
|--------|-----------------------------------------------------------------------------------------------------|--------|------------------------|----------------------------------------------------------------------------------------------|--------------------------------------------------------|---------------------------------------------------------------------------|--------|--------|------|
|        | cerevisiae S288c]                                                                                   |        |                        |                                                                                              |                                                        |                                                                           |        |        |      |
| P34227 | Mitochondrial peroxiredoxin PRX1 [OS=Saccharomyces cerevisiae S288c]                                | 852215 | PRX1; YBL064C          | cellular homeostasis;metabolic process;regulation of biological process;response to stimulus | mitochondrion                                          | antioxidant activity;catalytic activity                                   | 6.848  | 6.848  | 1.00 |
| P47127 | Altered inheritance of mitochondria protein 24, mitochondrial [OS=Saccharomyces cerevisiae S288c]   | 853543 | AIM24; YJR080C         | cell organization and biogenesis                                                             | mitochondrion                                          |                                                                           | 3.175  | 3.175  | 1.00 |
| P39925 | Mitochondrial respiratory chain complexes assembly protein AFG3 [OS=Saccharomyces cerevisiae S288c] | 856737 | AFG3; YER017C          | cell organization and biogenesis;metabolic process;response to stimulus;transport            | membrane;mitochondrion                                 | catalytic activity;metal ion binding;nucleotide binding;protein binding   | 1.228  | 1.228  | 1.00 |
| P05626 | ATP synthase subunit 4, mitochondrial [OS=Saccharomyces cerevisiae S288c]                           | 856027 | ATP4; YPL078C          | cell organization and biogenesis;metabolic process;transport                                 | membrane;mitochondrion                                 | catalytic activity;transporter activity                                   | 3.642  | 3.642  | 1.00 |
| P42940 | Probable electron transfer flavoprotein subunit beta [OS=Saccharomyces cerevisiae S288c]            | 853121 | CIR1; YGR207C          | metabolic process;transport                                                                  | mitochondrion;organelle lumen                          |                                                                           | 7.66   | 7.66   | 1.00 |
| P32332 | Mitochondrial oxaloacetate transport protein [OS=Saccharomyces cerevisiae S288c]                    | 853739 | OAC1; YKL120W          | metabolic process;transport                                                                  | membrane;mitochondrion                                 | structural molecule activity;transporter activity                         | 5.813  | 5.813  | 1.00 |
| P52893 | probable alanine aminotransferase, mitochondrial [OS=Saccharomyces cerevisiae S288c]                | 850778 | ALT1; YLR089C          | metabolic process                                                                            | mitochondrion;organelle lumen                          | catalytic activity                                                        | 1.438  | 1.438  | 1.00 |
| P25039 | Elongation factor G, mitochondrial [OS=Saccharomyces cerevisiae S288c]                              | 850758 | MEF1; YLR069C          | cell organization and biogenesis;metabolic process                                           | cytosol;mitochondrion                                  | catalytic activity;nucleotide binding;RNA binding                         | 1.024  | 1.024  | 1.00 |
| P32787 | Mitochondrial genome maintenance protein MGM101 [OS=Saccharomyces cerevisiae S288c]                 | 853609 | MGM101 ; YJR144W       | cell organization and biogenesis;metabolic process;response to stimulus                      | chromosome;mitochondrion                               | DNA binding                                                               | 4.456  | 4.456  | 1.00 |
| P25613 | Accumulation of dyads protein 2 [OS=Saccharomyces cerevisiae S288c]                                 | 850368 | ADY2; YCR010C          | transport                                                                                    | membrane;mitochondrion;vacuole                         | transporter activity                                                      | 12.895 | 12.895 | 1.00 |
| P30902 | ATP synthase subunit d, mitochondrial [OS=Saccharomyces cerevisiae S288c]                           | 853853 | ATP7; YKL016C          | metabolic process;transport                                                                  | membrane;mitochondrion                                 | catalytic activity;transporter activity                                   | 5.105  | 5.105  | 1.00 |
| P40035 | Mitochondrial phosphate carrier protein 2 [OS=Saccharomyces cerevisiae S288c]                       | 856779 | PIC2; YER053C          | cellular homeostasis;metabolic process;transport                                             | membrane;mitochondrion                                 | structural molecule activity;transporter activity                         | 2.793  | 2.793  | 1.00 |
| Q12207 | Non-classical export protein 2 [OS=Saccharomyces cerevisiae S288c]                                  | 856272 | NCE102; YPR149W        | cell organization and biogenesis;regulation of biological process;transport                  | cytoplasm;endoplasmic reticulum;membrane;mitochondrion |                                                                           | 12.895 | 12.895 | 1.00 |
| P38088 | Glycine--tRNA ligase 1, mitochondrial [OS=Saccharomyces cerevisiae S288c]                           |        |                        | metabolic process                                                                            | cytoplasm;mitochondrion;organelle lumen                | catalytic activity;nucleotide binding;protein binding                     | 0.468  | 0.468  | 1.00 |
| P32897 | Mitochondrial import inner membrane translocase subunit tim23 [OS=Saccharomyces cerevisiae S288c]   | 855751 | TIM23; YNR017 W        | transport                                                                                    | membrane;mitochondrion                                 | protein binding;transporter activity                                      | 5.31   | 5.31   | 1.00 |
| P40513 | Mitochondrial acidic protein MAM33 [OS=Saccharomyces cerevisiae S288c]                              | 854740 | MAM33; YIL070C         | metabolic process;regulation of biological process                                           | mitochondrion;organelle lumen                          | translation regulator activity                                            | 3.642  | 3.642  | 1.00 |
| P00410 | Cytochrome c oxidase subunit 2 [OS=Saccharomyces cerevisiae S288c]                                  | 854622 | COX2; Q0250            | metabolic process;transport                                                                  | membrane;mitochondrion                                 | catalytic activity;metal ion binding;protein binding;transporter activity | 3.642  | 3.642  | 1.00 |
| Q02950 | 37S ribosomal protein MRP51, mitochondrial [OS=Saccharomyces cerevisiae S288c]                      | 855985 | MRP51; YPL118W         | cell organization and biogenesis;metabolic process                                           | mitochondrion;ribosome                                 | structural molecule activity                                              | 1.154  | 1.154  | 1.00 |
| Q07349 | MIOREX complex component 9 [OS=Saccharomyces cerevisiae S288c]                                      | 851535 | YDL027C; MRX9; YDL027C |                                                                                              | endoplasmic reticulum;membrane;mitochondrion           |                                                                           | 1.913  | 1.913  | 1.00 |
| Q06236 | Mitochondrial inner membrane protein SHH4 [OS=Saccharomyces cerevisiae S288c]                       | 850861 | SHH4; YLR164W          | metabolic process                                                                            | membrane;mitochondrion                                 | catalytic activity;metal ion binding                                      | 6.499  | 6.499  | 1.00 |
| P32331 | Carrier protein YMC1, mitochondrial [OS=Saccharomyces cerevisiae S288c]                             | 856171 | YMC1; YPR058W          | metabolic process;transport                                                                  | membrane;mitochondrion;vacuole                         | structural molecule activity;transporter activity                         | 2.384  | 2.384  | 1.00 |

|        |                                                                                                                    |        |                         |                                                                                     |                                                      |                                                                     |       |       |      |
|--------|--------------------------------------------------------------------------------------------------------------------|--------|-------------------------|-------------------------------------------------------------------------------------|------------------------------------------------------|---------------------------------------------------------------------|-------|-------|------|
| Q12029 | Probable mitochondrial transport protein fsf1 [OS=Saccharomyces cerevisiae S288c]                                  | 854445 | FSF1; YOR271C           | transport                                                                           | membrane;mitochondrion                               | transporter activity                                                | 2.36  | 2.36  | 1.00 |
| P39952 | Mitochondrial inner membrane protein OXA1 [OS=Saccharomyces cerevisiae S288c]                                      | 856898 | OXA1; YER154W           | cell organization and biogenesis;transport                                          | membrane;mitochondrion                               | transporter activity                                                | 1.738 | 1.738 | 1.00 |
| P53292 | 37S ribosomal protein S35, mitochondrial [OS=Saccharomyces cerevisiae S288c]                                       | 853075 | MRPS35; YGR165W         | cell organization and biogenesis;metabolic process                                  | mitochondrion;ribosome                               | structural molecule activity                                        | 1.512 | 1.512 | 1.00 |
| P11325 | Leucine-tRNA ligase, mitochondrial [OS=Saccharomyces cerevisiae S288c]                                             | 851098 | NAM2; YLR382C           | cell organization and biogenesis;metabolic process;regulation of biological process | cytosol;mitochondrion;organelle lumen                | catalytic activity;nucleotide binding;RNA binding                   | 0.353 | 0.353 | 1.00 |
| P53889 | uncharacterized mitochondrial hydrolase FMP41 [OS=Saccharomyces cerevisiae S288c]                                  | 855553 | FMP41; YNL168C          | metabolic process                                                                   | mitochondrion                                        | catalytic activity;metal ion binding                                | 1.254 | 1.254 | 1.00 |
| Q12165 | ATP synthase subunit delta, mitochondrial [OS=Saccharomyces cerevisiae S288c]                                      | 851560 | ATP16; YDL004W          | metabolic process;transport                                                         | membrane;mitochondrion                               | catalytic activity;transporter activity                             | 4.623 | 4.623 | 1.00 |
| P36141 | Putative redox protein fmp46, mitochondrial [OS=Saccharomyces cerevisiae S288c]                                    | 853923 | FMP46; YKR049C          | metabolic process                                                                   | mitochondrion                                        | catalytic activity;protein binding                                  | 4.337 | 4.337 | 1.00 |
| P23644 | Mitochondrial import receptor subunit TOM40 [OS=Saccharomyces cerevisiae S288c]                                    | 855243 | TOM40; YMR203W          | transport                                                                           | cytosol;membrane;mitochondrion                       | protein binding;transporter activity                                | 1.154 | 1.154 | 1.00 |
| Q12117 | Protein MRH1 [OS=Saccharomyces cerevisiae S288c]                                                                   | 851597 | MRH1; YDR033W           | transport                                                                           | endoplasmic reticulum;membrane;mitochondrion         | transporter activity                                                | 2.831 | 2.831 | 1.00 |
| Q06493 | LETM1 domain-containing protein YLH47, mitochondrial [OS=Saccharomyces cerevisiae S288c]                           | 856243 | YLH47; YPR125W          | cell organization and biogenesis;transport                                          | membrane;mitochondrion                               |                                                                     | 1.043 | 1.043 | 1.00 |
| P43594 | MICOS complex subunit MIC19 [OS=Saccharomyces cerevisiae S288c]                                                    | 850563 | AIM13; MIC19; YFR011C   | cell organization and biogenesis                                                    | cytoplasm;membrane;mitochondrion                     |                                                                     | 3.329 | 3.329 | 1.00 |
| P36534 | 54S ribosomal protein L40, mitochondrial [OS=Saccharomyces cerevisiae S288c]                                       | 855930 | MRPL40; YPL173W         | cell organization and biogenesis;metabolic process                                  | mitochondrion;ribosome                               | protein binding;structural molecule activity                        | 1.512 | 1.512 | 1.00 |
| Q02204 | 54S ribosomal protein L13, mitochondrial [OS=Saccharomyces cerevisiae S288c]                                       | 853875 | MRPL13; YKR006C         | cell organization and biogenesis;metabolic process                                  | mitochondrion;ribosome                               | structural molecule activity                                        | 1.371 | 1.371 | 1.00 |
| P40508 | Uncharacterized protein YIL077C [OS=Saccharomyces cerevisiae S288c]                                                | 854733 | YIL077C; YIL077C        |                                                                                     | mitochondrion                                        |                                                                     | 1.448 | 1.448 | 1.00 |
| Q05892 | MIOREX complex component 2 [OS=Saccharomyces cerevisiae S288c]                                                     | 850997 | YLR290C; COQ11; YLR290C | metabolic process                                                                   | mitochondrion                                        | catalytic activity                                                  | 3.217 | 3.217 | 1.00 |
| P37298 | Succinate dehydrogenase (ubiquinone) cytochrome b small subunit, mitochondrial [OS=Saccharomyces cerevisiae S288c] | 851758 | SDH4; YDR178W           | metabolic process;transport                                                         | membrane;mitochondrion                               | catalytic activity;metal ion binding                                | 4.995 | 4.995 | 1.00 |
| Q12374 | Nuclear control of ATPase protein 2 [OS=Saccharomyces cerevisiae S288c]                                            | 856278 | NCA2; YPR155C           | metabolic process                                                                   | membrane;mitochondrion                               |                                                                     | 0.565 | 0.565 | 1.00 |
| P47045 | mitochondrial import inner membrane translocase subunit TIM54 [OS=Saccharomyces cerevisiae S288c]                  | 853392 | TIM54; YIL054W          | cell organization and biogenesis;transport                                          | cytosol;membrane;mitochondrion                       | transporter activity                                                | 0.655 | 0.655 | 1.00 |
| P39965 | probable proline-tRNA ligase, mitochondrial [OS=Saccharomyces cerevisiae S288c]                                    | 856820 | AIM10; YER087W          | metabolic process                                                                   | cytoplasm;mitochondrion                              | catalytic activity;nucleotide binding;RNA binding                   | 0.343 | 0.343 | 1.00 |
| P40582 | Glutathione S-transferase 1 [OS=Saccharomyces cerevisiae S288c]                                                    | 854856 | GTT1; YIR038C           | metabolic process                                                                   | endoplasmic reticulum;membrane;mitochondrion;nucleus | antioxidant activity;catalytic activity;protein binding;RNA binding | 1.683 | 1.683 | 1.00 |
| P38910 | 10 kDa heat shock protein, mitochondrial [OS=Saccharomyces cerevisiae S288c]                                       | 854185 | HSP10; YOR020C          | cell organization and biogenesis;metabolic process;response to stimulus;transport   | cytoplasm;mitochondrion;organelle lumen              | metal ion binding;nucleotide binding;protein binding                | 4.623 | 4.623 | 1.00 |
| Q12482 | Mitochondrial aspartate-glutamate transporter AGC1 [OS=Saccharomyces cerevisiae S288c]                             | 856132 | AGC1; YPR021C           | metabolic process;transport                                                         | membrane;mitochondrion                               | structural molecule activity;transporter activity                   | 0.407 | 0.407 | 1.00 |
| Q06143 | mitochondrial dicarboxylate transporter [OS=Saccharomyces cerevisiae S288c]                                        | 851063 | DIC1; YLR348C           | metabolic process;transport                                                         | membrane;mitochondrion                               | structural molecule activity;transporter activity                   | 1.154 | 1.154 | 1.00 |

|        |                                                                                           |         |                        |                                                                                                        |                                              |                                                                             |       |       |      |
|--------|-------------------------------------------------------------------------------------------|---------|------------------------|--------------------------------------------------------------------------------------------------------|----------------------------------------------|-----------------------------------------------------------------------------|-------|-------|------|
| Q12349 | ATP synthase subunit H, mitochondrial [OS=Saccharomyces cerevisiae S288c]                 | 851002  | ATP14; YLR295C         | cell organization and biogenesis;metabolic process;transport                                           | membrane;mitochondrion                       | catalytic activity;transporter activity                                     | 2.728 | 2.728 | 1.00 |
| P35996 | 54S ribosomal protein L38, mitochondrial [OS=Saccharomyces cerevisiae S288c]              | 853684  | MRPL38; YKL170W        | cell organization and biogenesis;metabolic process                                                     | mitochondrion;ribosome                       | RNA binding;structural molecule activity                                    | 2.594 | 2.594 | 1.00 |
| Q3E824 | Uncharacterized protein YOR020W-A [OS=Saccharomyces cerevisiae S288c]                     | 1466480 | YOR020 W-A; YOR020 W-A | metabolic process;transport                                                                            | membrane;mitochondrion                       |                                                                             | 5.813 | 5.813 | 1.00 |
| P32904 | 54S ribosomal protein L6, mitochondrial [OS=Saccharomyces cerevisiae S288c]               | 856552  | MRPL6; YHR147C         | cell organization and biogenesis;metabolic process                                                     | mitochondrion;ribosome                       | RNA binding;structural molecule activity                                    | 1.371 | 1.371 | 1.00 |
| P40416 | Iron-sulfur clusters transporter ATM1, mitochondrial [OS=Saccharomyces cerevisiae S288c]  | 855347  | ATM1; YMR301C          | cellular homeostasis;metabolic process;transport                                                       | membrane;mitochondrion                       | catalytic activity;nucleotide binding;transporter activity                  | 0.453 | 0.453 | 1.00 |
| P32453 | Protein ATP11, mitochondrial [OS=Saccharomyces cerevisiae S288c]                          | 855401  | ATP11; YNL315C         | cell organization and biogenesis                                                                       | mitochondrion                                | protein binding                                                             | 1.512 | 1.512 | 1.00 |
| P25626 | 54S ribosomal protein IMG1, mitochondrial [OS=Saccharomyces cerevisiae S288c]             | 850413  | IMG1; YCR046C          | cell organization and biogenesis;metabolic process                                                     | mitochondrion;ribosome                       | structural molecule activity                                                | 1.424 | 1.424 | 1.00 |
| P50945 | MICOS complex subunit MIC27 [OS=Saccharomyces cerevisiae S288c]                           | 855623  | AIM37; MIC27; YNL100W  | cell organization and biogenesis                                                                       | membrane;mitochondrion                       |                                                                             | 1.254 | 1.254 | 1.00 |
| P10834 | protein PET54 [OS=Saccharomyces cerevisiae S288c]                                         | 853137  | PET54; YGR222 W        | metabolic process;regulation of biological process                                                     | membrane;mitochondrion;organelle lumen       | nucleotide binding;RNA binding;translation regulator activity               | 0.874 | 0.874 | 1.00 |
| Q08970 | Mitochondrial metal transporter 2 [OS=Saccharomyces cerevisiae S288c]                     | 855877  | MMT2; YPL224C          | cellular homeostasis;regulation of biological process;response to stimulus;transport                   | membrane;mitochondrion                       | transporter activity                                                        | 0.532 | 0.532 | 1.00 |
| Q03201 | 37S ribosomal protein S10, mitochondrial [OS=Saccharomyces cerevisiae S288c]              | 851611  | RSM10; YDR041 W        | cell organization and biogenesis;metabolic process                                                     | mitochondrion;ribosome                       | structural molecule activity                                                | 1.424 | 1.424 | 1.00 |
| P36521 | 54S ribosomal protein L11, mitochondrial [OS=Saccharomyces cerevisiae S288c]              | 851325  | MRPL11; YDL202W        | cell organization and biogenesis;metabolic process                                                     | mitochondrion;ribosome                       | structural molecule activity                                                | 1.069 | 1.069 | 1.00 |
| P25372 | Thioredoxin-3, mitochondrial [OS=Saccharomyces cerevisiae S288c]                          | 850444  | TRX3; YCR083W          | cellular homeostasis;metabolic process;regulation of biological process;response to stimulus;transport | cytoplasm;mitochondrion                      | catalytic activity                                                          | 2.511 | 2.511 | 1.00 |
| P33759 | 37S ribosomal protein S5, mitochondrial [OS=Saccharomyces cerevisiae S288c]               | 852553  | MRP55; YBR251W         | cell organization and biogenesis;metabolic process                                                     | mitochondrion;ribosome                       | RNA binding;structural molecule activity                                    | 0.995 | 0.995 | 1.00 |
| P32387 | 54S ribosomal protein L41, mitochondrial [OS=Saccharomyces cerevisiae S288c]              | 852014  | MRP20; YDR405 W        | cell organization and biogenesis;metabolic process                                                     | mitochondrion;ribosome                       | nucleotide binding;protein binding;RNA binding;structural molecule activity | 1.254 | 1.254 | 1.00 |
| Q04172 | Sensitive to high expression protein 9, mitochondrial [OS=Saccharomyces cerevisiae S288c] | 852002  | SHE9; YDR393 W         | cell organization and biogenesis                                                                       | membrane;mitochondrion                       |                                                                             | 0.374 | 0.374 | 1.00 |
| P27697 | Atypical kinase COQ8, mitochondrial [OS=Saccharomyces cerevisiae S288c]                   | 852758  | COQ8; YGL119W          | metabolic process                                                                                      | membrane;mitochondrion;organelle lumen       | catalytic activity;nucleotide binding                                       | 0.453 | 0.453 | 1.00 |
| Q08245 | protein ZEO1 [OS=Saccharomyces cerevisiae S288c]                                          | 854040  | ZEO1; YOL109W          | cell organization and biogenesis                                                                       | membrane;mitochondrion                       | protein binding                                                             | 2.162 | 2.162 | 1.00 |
| P36519 | 54S ribosomal protein L7, mitochondrial [OS=Saccharomyces cerevisiae S288c]               | 851823  | MRPL7; YDR237 W        | cell organization and biogenesis;metabolic process                                                     | mitochondrion;ribosome                       | RNA binding;structural molecule activity                                    | 0.468 | 0.468 | 1.00 |
| P53311 | Mitochondrial pyruvate carrier 3 [OS=Saccharomyces cerevisiae S288c]                      | 853158  | FMP43; MPC3; YGR243 W  | transport                                                                                              | membrane;mitochondrion                       | transporter activity                                                        | 1.154 | 1.154 | 1.00 |
| Q12305 | Thiosulfate sulfurtransferase RDL1, mitochondrial [OS=Saccharomyces cerevisiae S288c]     | 854459  | RDL1; YOR285 W         |                                                                                                        | endoplasmic reticulum;membrane;mitochondrion | catalytic activity                                                          | 1.154 | 1.154 | 1.00 |
| Q12204 | Probable phospholipase YOR022C, mitochondrial [OS=Saccharomyces cerevisiae S288c]         | 854187  | YOR022C ; YOR022C      | metabolic process                                                                                      | mitochondrion                                | catalytic activity;metal ion binding                                        | 0.233 | 0.233 | 1.00 |

|        |                                                                                                     |        |                         |                                                                                   |                                              |                                                             |       |       |      |
|--------|-----------------------------------------------------------------------------------------------------|--------|-------------------------|-----------------------------------------------------------------------------------|----------------------------------------------|-------------------------------------------------------------|-------|-------|------|
| Q12251 | Uncharacterized mitochondrial carrier YPR011C [OS=Saccharomyces cerevisiae S288c]                   | 856121 | YPR011C; YPR011C        | metabolic process;transport                                                       | membrane;mitochondrion                       | structural molecule activity;transporter activity           | 0.551 | 0.551 | 1.00 |
| P41903 | Peroxisomal acyl-coenzyme A thioester hydrolase 1 [OS=Saccharomyces cerevisiae S288c]               | 853477 | TES1; YJR019C           | metabolic process                                                                 | mitochondrion                                | catalytic activity                                          | 0.931 | 0.931 | 1.00 |
| P47140 | Altered inheritance rate of mitochondria protein 25 [OS=Saccharomyces cerevisiae S288c]             | 853563 | AIM25; YJR100C          | cell organization and biogenesis                                                  | membrane;mitochondrion                       | transporter activity                                        | 0.369 | 0.369 | 1.00 |
| P32839 | Mitochondrial chaperone BCS1 [OS=Saccharomyces cerevisiae S288c]                                    | 851981 | BCS1; YDR375C           | cell organization and biogenesis;metabolic process;response to stimulus;transport | cytosol;membrane;mitochondrion               | catalytic activity;nucleotide binding;transporter activity  | 0.425 | 0.425 | 1.00 |
| Q01519 | Cytochrome c oxidase subunit 6b [OS=Saccharomyces cerevisiae S288c]                                 | 850727 | COX12; YLR038C          | cell organization and biogenesis;metabolic process;transport                      | mitochondrion                                | catalytic activity;transporter activity                     | 3.642 | 3.642 | 1.00 |
| Q02888 | Inner membrane assembly complex subunit 17 [OS=Saccharomyces cerevisiae S288c]                      | 856005 | AIM43; INA17; YPL099C   | cell organization and biogenesis                                                  | membrane;mitochondrion                       | protein binding                                             | 0.701 | 0.701 | 1.00 |
| Q06567 | ABC1 family protein MCP2 [OS=Saccharomyces cerevisiae S288c]                                        | 850955 | YLR253W ; MCP2; YLR253W | cell organization and biogenesis                                                  | membrane;mitochondrion                       |                                                             | 0.218 | 0.218 | 1.00 |
| P49017 | 2-methoxy-6-polyprenyl-1,4-benzoquinol methylase, mitochondrial [OS=Saccharomyces cerevisiae S288c] | 854930 | COQ5; YML110C           | metabolic process                                                                 | membrane;mitochondrion;organelle lumen       | catalytic activity                                          | 0.551 | 0.551 | 1.00 |
| Q12359 | Ammonia transport outward protein 3 [OS=Saccharomyces cerevisiae S288c]                             | 851992 | ATO3; YDR384C           | transport                                                                         | membrane;mitochondrion                       | transporter activity                                        | 0.995 | 0.995 | 1.00 |
| P37299 | cytochrome b-c1 complex subunit 10 [OS=Saccharomyces cerevisiae S288c]                              | 856390 | QCR10; YHR001 W-A       | metabolic process;transport                                                       | membrane;mitochondrion                       | catalytic activity;transporter activity                     | 5.31  | 5.31  | 1.00 |
| P38079 | protein YRO2 [OS=Saccharomyces cerevisiae S288c]                                                    | 852343 | YRO2; YBR054W           | transport                                                                         | endoplasmic reticulum;membrane;mitochondrion | transporter activity                                        | 1.424 | 1.424 | 1.00 |
| P53305 | Mitochondrial 37S ribosomal protein S27 [OS=Saccharomyces cerevisiae S288c]                         | 853129 | RSM27; YGR215 W         | cell organization and biogenesis;metabolic process                                | mitochondrion;ribosome                       | structural molecule activity                                | 2.162 | 2.162 | 1.00 |
| P46998 | mitochondrial membrane protein FMP33 [OS=Saccharomyces cerevisiae S288c]                            | 853279 | FMP33; YJL161W          |                                                                                   | membrane;mitochondrion                       |                                                             | 2.162 | 2.162 | 1.00 |
| Q06485 | Autophagy-related protein 33 [OS=Saccharomyces cerevisiae S288c]                                    | 851070 | ATG33; YLR356W          | cell communication;metabolic process;response to stimulus                         | membrane;mitochondrion                       |                                                             | 2.162 | 2.162 | 1.00 |
| Q12233 | ATP synthase subunit g, mitochondrial [OS=Saccharomyces cerevisiae S288c]                           | 856131 | ATP20; YPR020W          | cell organization and biogenesis;metabolic process;transport                      | membrane;mitochondrion                       | catalytic activity;transporter activity                     | 1.371 | 1.371 | 1.00 |
| P32611 | 54S ribosomal protein RML2, mitochondrial [OS=Saccharomyces cerevisiae S288c]                       | 856660 | RML2; YEL050C           | cell organization and biogenesis;metabolic process                                | mitochondrion;ribosome                       | catalytic activity;RNA binding;structural molecule activity | 0.389 | 0.389 | 1.00 |
| P38300 | Inner membrane mitoribosome receptor MBA1, mitochondrial [OS=Saccharomyces cerevisiae S288c]        | 852483 | MBA1; YBR185C           | cell organization and biogenesis;regulation of biological process                 | membrane;mitochondrion                       |                                                             | 0.995 | 0.995 | 1.00 |
| Q03020 | iron sulfur cluster assembly protein 1, mitochondrial [OS=Saccharomyces cerevisiae S288c]           | 855968 | ISU1; YPL135W           | cell organization and biogenesis;cellular homeostasis;metabolic process           | cytoplasm;mitochondrion;organelle lumen      | catalytic activity;metal ion binding;protein binding        | 0.778 | 0.778 | 1.00 |
| P14540 | fructose-bisphosphate aldolase [OS=Saccharomyces cerevisiae S288c]                                  | 853805 | FBA1; YKL060C           | metabolic process                                                                 | cytoplasm;cytosol;membrane;mitochondrion     | catalytic activity;metal ion binding                        | 0.292 | 0.292 | 1.00 |
| Q02608 | 37S ribosomal protein S16, mitochondrial [OS=Saccharomyces cerevisiae S288c]                        | 856094 | MRPS16; YPL013C         | cell organization and biogenesis;metabolic process                                | mitochondrion;ribosome                       | structural molecule activity                                | 1.683 | 1.683 | 1.00 |
| P40159 | Uncharacterized protein YNL208W [OS=Saccharomyces cerevisiae S288c]                                 | 855513 | YNL208W ; YNL208W       |                                                                                   | membrane;mitochondrion;ribosome              |                                                             | 0.668 | 0.668 | 1.00 |
| P53732 | 37S ribosomal protein S12, mitochondrial [OS=Saccharomyces cerevisiae S288c]                        | 855772 | MRPS12; YNR036C         | cell organization and biogenesis;metabolic process                                | mitochondrion;ribosome                       | structural molecule activity                                | 1.154 | 1.154 | 1.00 |
| P23369 | 54S ribosomal protein L25, mitochondrial [OS=Saccharomyces cerevisiae S288c]                        | 852967 | MRPL25; YGR076C         | cell organization and biogenesis;metabolic process                                | mitochondrion;ribosome                       | structural molecule activity                                | 1.31  | 1.31  | 1.00 |

|        |                                                                                                                   |        |                         |                                                              |                                         |                                                                |       |       |      |
|--------|-------------------------------------------------------------------------------------------------------------------|--------|-------------------------|--------------------------------------------------------------|-----------------------------------------|----------------------------------------------------------------|-------|-------|------|
| Q6Q560 | Protein isd11<br>[OS=Saccharomyces cerevisiae S288c]                                                              | 856774 | ISD11;<br>YER048W<br>-A | cell organization and biogenesis;metabolic process           | mitochondrion;organelle lumen           | catalytic activity;protein binding                             | 1.783 | 1.783 | 1.00 |
| P41911 | Glycerol-3-phosphate dehydrogenase [NAD(+)] 2, mitochondrial<br>[OS=Saccharomyces cerevisiae S288c]               | 854095 | GD2;<br>YOL059W         | metabolic process                                            | cytoplasm;cytosol;mitochondrion         | catalytic activity;nucleotide binding;protein binding          | 0.186 | 0.186 | 1.00 |
| P53220 | Mitochondrial import inner membrane translocase subunit TIM21<br>[OS=Saccharomyces cerevisiae S288c]              | 852921 | TIM21;<br>YGR033C       | cell organization and biogenesis;transport                   | membrane;mitochondrion                  | protein binding                                                | 0.719 | 0.719 | 1.00 |
| P33421 | Succinate dehydrogenase [ubiquinone] cytochrome b subunit, mitochondrial<br>[OS=Saccharomyces cerevisiae S288c]   | 853716 | SDH3;<br>YKL141W        | cell organization and biogenesis;metabolic process;transport | membrane;mitochondrion                  | catalytic activity;metal ion binding                           | 1.276 | 1.276 | 1.00 |
| P53724 | 54S ribosomal protein L50, mitochondrial<br>[OS=Saccharomyces cerevisiae S288c]                                   | 855756 | MRPL50;<br>YNR022C      | cell organization and biogenesis;metabolic process           | mitochondrion;ribosome                  | structural molecule activity                                   | 1.512 | 1.512 | 1.00 |
| P38702 | mitochondrial carrier protein LEU5<br>[OS=Saccharomyces cerevisiae S288c]                                         | 856391 | LEU5;<br>YHR002<br>W    | metabolic process;transport                                  | membrane;mitochondrion                  | structural molecule activity;transporter activity              | 0.334 | 0.334 | 1.00 |
| P36147 | Presequence translocated-associated motor subunit pam17, mitochondrial<br>[OS=Saccharomyces cerevisiae S288c]     | 853939 | PAM17;<br>YKR065C       | transport                                                    | membrane;mitochondrion                  |                                                                | 1.371 | 1.371 | 1.00 |
| Q02883 | N-acyl-phosphatidylethanolamine-hydrolyzing phospholipase D, mitochondrial<br>[OS=Saccharomyces cerevisiae S288c] | 856001 | FMP30;<br>YPL103C       | metabolic process                                            | membrane;mitochondrion                  | catalytic activity;metal ion binding                           | 0.425 | 0.425 | 1.00 |
| P36526 | 54S ribosomal protein L27, mitochondrial<br>[OS=Saccharomyces cerevisiae S288c]                                   | 852585 | MRPL27;<br>YBR282W      | cell organization and biogenesis;metabolic process           | mitochondrion;ribosome                  | structural molecule activity                                   | 0.995 | 0.995 | 1.00 |
| P53163 | 54S ribosomal protein L12, mitochondrial<br>[OS=Saccharomyces cerevisiae S288c]                                   | 852811 | MNP1;<br>YGL068W        | cell organization and biogenesis;metabolic process           | mitochondrion;ribosome                  | RNA binding;structural molecule activity                       | 1.31  | 1.31  | 1.00 |
| P53166 | ATP-dependent RNA helicase mrh4, mitochondrial<br>[OS=Saccharomyces cerevisiae S288c]                             | 852816 | MRH4;<br>YGL064C        | cell organization and biogenesis;metabolic process           | mitochondrion;organelle lumen           | catalytic activity;nucleotide binding;RNA binding              | 0.145 | 0.145 | 1.00 |
| Q07914 | mitochondrial import inner membrane translocase subunit TIM14<br>[OS=Saccharomyces cerevisiae S288c]              | 850694 | PAM18;<br>YLR008C       | regulation of biological process;transport                   | membrane;mitochondrion                  | enzyme regulator activity;protein binding;transporter activity | 0.778 | 0.778 | 1.00 |
| P36531 | 54S ribosomal protein L36, mitochondrial<br>[OS=Saccharomyces cerevisiae S288c]                                   | 852419 | MRPL36;<br>YBR122C      | cell organization and biogenesis;metabolic process           | mitochondrion;ribosome                  | structural molecule activity                                   | 0.668 | 0.668 | 1.00 |
| P21306 | ATP synthase subunit epsilon, mitochondrial<br>[OS=Saccharomyces cerevisiae S288c]                                | 855857 | ATP15;<br>YPL271W       | metabolic process;transport                                  | membrane;mitochondrion                  | catalytic activity;transporter activity                        | 2.162 | 2.162 | 1.00 |
| Q01976 | ADP-ribose pyrophosphatase<br>[OS=Saccharomyces cerevisiae S288c]                                                 | 852408 | YSA1;<br>YBR111C        | metabolic process                                            | cytoplasm;mitochondrion;nucleus         | catalytic activity;metal ion binding                           | 0.425 | 0.425 | 1.00 |
| P38169 | Kynurenine 3-monooxygenase<br>[OS=Saccharomyces cerevisiae S288c]                                                 | 852179 | BNA4;<br>YBL098W        | metabolic process                                            | membrane;mitochondrion                  | catalytic activity;nucleotide binding                          | 0.269 | 0.269 | 1.00 |
| P32785 | Methionyl-tRNA formyltransferase, mitochondrial<br>[OS=Saccharomyces cerevisiae S288c]                            | 852270 | FMT1;<br>YBL013W        | metabolic process                                            | mitochondrion                           | catalytic activity                                             | 0.179 | 0.179 | 1.00 |
| P81451 | ATP synthase subunit K, mitochondrial<br>[OS=Saccharomyces cerevisiae S288c]                                      | 854077 | ATP19;<br>YOL077W<br>-A | cell organization and biogenesis;metabolic process;transport | membrane;mitochondrion                  | catalytic activity;transporter activity                        | 3.642 | 3.642 | 1.00 |
| P81450 | ATP synthase subunit J, mitochondrial<br>[OS=Saccharomyces cerevisiae S288c]                                      | 854893 | ATP18;<br>YML081C<br>-A | cell organization and biogenesis;metabolic process;transport | membrane;mitochondrion                  | catalytic activity;transporter activity                        | 9     | 9     | 1.00 |
| P39677 | Ribosome-releasing factor 2, mitochondrial<br>[OS=Saccharomyces cerevisiae S288c]                                 | 853342 | MEF2;<br>YJL102W        | cell organization and biogenesis;metabolic process           | cytosol;mitochondrion                   | catalytic activity;nucleotide binding;RNA binding              | 0.179 | 0.179 | 1.00 |
| P25345 | Asparagine--tRNA ligase, mitochondrial<br>[OS=Saccharomyces cerevisiae S288c]                                     | 850388 | SLM5;<br>YCR024C        | metabolic process                                            | cytoplasm;mitochondrion;organelle lumen | catalytic activity;nucleotide binding                          | 0.172 | 0.172 | 1.00 |
| Q07534 | Solute carrier family 25 member 38 homolog                                                                        | 851439 | YDL119C;<br>HEM25;      | metabolic process;transport                                  | membrane;mitochondrion                  | structural molecule activity;transporter                       | 0.389 | 0.389 | 1.00 |

|        |                                                                                                |         |                      |                                                                                                          |                                          |                                                                                        |       |       |      |
|--------|------------------------------------------------------------------------------------------------|---------|----------------------|----------------------------------------------------------------------------------------------------------|------------------------------------------|----------------------------------------------------------------------------------------|-------|-------|------|
|        | [OS=Saccharomyces cerevisiae S288c]                                                            |         | YDL119C              |                                                                                                          |                                          | activity                                                                               |       |       |      |
| P20084 | 54S ribosomal protein L33, mitochondrial [OS=Saccharomyces cerevisiae S288c]                   | 855330  | MRPL33; YMR286W      | cell organization and biogenesis;metabolic process                                                       | mitochondrion;ribosome                   | structural molecule activity                                                           | 2.162 | 2.162 | 1.00 |
| P47141 | 37S ribosomal protein S26, mitochondrial [OS=Saccharomyces cerevisiae S288c]                   | 853565  | RSM26; YJR101W       | cell organization and biogenesis;metabolic process;response to stimulus                                  | mitochondrion;ribosome                   | antioxidant activity;catalytic activity;metal ion binding;structural molecule activity | 0.425 | 0.425 | 1.00 |
| P40858 | 54S ribosomal protein L49, mitochondrial [OS=Saccharomyces cerevisiae S288c]                   | 853349  | MRPL49; YJL096W      | cell organization and biogenesis;metabolic process                                                       | mitochondrion;ribosome                   | RNA binding;structural molecule activity                                               | 0.468 | 0.468 | 1.00 |
| P36523 | 54S ribosomal protein L15, mitochondrial [OS=Saccharomyces cerevisiae S288c]                   | 851022  | MRPL15; YLR312W -A   | cell organization and biogenesis;metabolic process                                                       | mitochondrion;ribosome                   | catalytic activity;RNA binding;structural molecule activity                            | 0.334 | 0.334 | 1.00 |
| P32792 | UPF0744 protein YSC83 [OS=Saccharomyces cerevisiae S288c]                                      | 856410  | YSC83; YHR017W       |                                                                                                          | membrane;mitochondrion                   |                                                                                        | 0.233 | 0.233 | 1.00 |
| P34224 | Uncharacterized protein YBL059W [OS=Saccharomyces cerevisiae S288c]                            | 852221  | YBL059W ; YBL059W    |                                                                                                          | membrane;mitochondrion                   |                                                                                        | 0.468 | 0.468 | 1.00 |
| Q08230 | Succinate dehydrogenase assembly factor 2, mitochondrial [OS=Saccharomyces cerevisiae S288c]   | 854083  | EMI5; SDH5; YOL071W  | cell differentiation;cell organization and biogenesis;metabolic process;regulation of biological process | mitochondrion;organelle lumen            | protein binding                                                                        | 0.468 | 0.468 | 1.00 |
| P50087 | MICOS subunit MIC26 [OS=Saccharomyces cerevisiae S288c]                                        | 853150  | MOS2; MIC26; YGR235C | cell organization and biogenesis                                                                         | membrane;mitochondrion                   |                                                                                        | 0.638 | 0.638 | 1.00 |
| P03879 | Intron-encoded RNA maturase bI4 [OS=Saccharomyces cerevisiae S288c]                            | 854582  | BI4; Q0120           | metabolic process                                                                                        | membrane;mitochondrion                   | catalytic activity;RNA binding                                                         | 0.28  | 0.28  | 1.00 |
| Q03429 | Mitochondrial zinc maintenance protein 1, mitochondrial [OS=Saccharomyces cerevisiae S288c]    | 852104  | MZM1; YDR493W        | cell organization and biogenesis;metabolic process                                                       | mitochondrion;organelle lumen            | protein binding                                                                        | 0.334 | 0.334 | 1.00 |
| P53875 | 54S ribosomal protein L19, mitochondrial [OS=Saccharomyces cerevisiae S288c]                   | 855536  | MRPL19; YNL185C      | cell organization and biogenesis;metabolic process                                                       | mitochondrion;ribosome                   | RNA binding;structural molecule activity                                               | 0.874 | 0.874 | 1.00 |
| Q01802 | Aspartate aminotransferase, mitochondrial [OS=Saccharomyces cerevisiae S288c]                  | 853755  | AAT1; YKL106W        | metabolic process                                                                                        | mitochondrion;organelle lumen            | catalytic activity;protein binding                                                     | 0.155 | 0.155 | 1.00 |
| P01098 | ATPase-stabilizing factor 9 kDa, mitochondrial [OS=Saccharomyces cerevisiae S288c]             | 851426  | STF1; YDL130W -A     | metabolic process;regulation of biological process                                                       | mitochondrion                            | catalytic activity;enzyme regulator activity;protein binding                           | 2.162 | 2.162 | 1.00 |
| Q05779 | Ubiquinone biosynthesis protein COQ9, mitochondrial [OS=Saccharomyces cerevisiae S288c]        | 850898  | COQ9; YLR201C        | metabolic process                                                                                        | membrane;mitochondrion                   |                                                                                        | 0.359 | 0.359 | 1.00 |
| P53212 | Probable transcriptional regulatory protein HAH1 [OS=Saccharomyces cerevisiae S288c]           | 852904  | YGR021W; YGR021W     |                                                                                                          | mitochondrion                            |                                                                                        | 0.359 | 0.359 | 1.00 |
| P00942 | Triosephosphate isomerase [OS=Saccharomyces cerevisiae S288c]                                  | 851620  | TPI1; YDR050C        | metabolic process                                                                                        | cytoplasm;cytosol;membrane;mitochondrion | catalytic activity                                                                     | 0.194 | 0.194 | 1.00 |
| P32378 | 4-hydroxybenzoate polyprenyltransferase, mitochondrial [OS=Saccharomyces cerevisiae S288c]     | 855778  | COQ2; YNR041C        | metabolic process;transport                                                                              | membrane;mitochondrion                   | catalytic activity                                                                     | 0.292 | 0.292 | 1.00 |
| P27680 | Ubiquinone biosynthesis O-methyltransferase, mitochondrial [OS=Saccharomyces cerevisiae S288c] | 854057  | COQ3; YOL096C        | metabolic process                                                                                        | membrane;mitochondrion                   | catalytic activity                                                                     | 0.274 | 0.274 | 1.00 |
| Q2V2P9 | Uncharacterized protein YDR119W-A [OS=Saccharomyces cerevisiae S288c]                          | 3799970 | COX26; YDR119W-A     |                                                                                                          | membrane;mitochondrion                   |                                                                                        | 1.154 | 1.154 | 1.00 |
| Q06090 | 54S ribosomal protein L51, mitochondrial [OS=Saccharomyces cerevisiae S288c]                   | 856214  | MRPL51; YPR100W      | cell organization and biogenesis;metabolic process                                                       | mitochondrion;ribosome                   | RNA binding;structural molecule activity                                               | 0.292 | 0.292 | 1.00 |
| Q08686 | Thiosulfate sulfurtransferase TUM1 [OS=Saccharomyces cerevisiae S288c]                         | 854425  | TUM1; YOR251C        | metabolic process                                                                                        | cytoplasm;mitochondrion                  | catalytic activity;protein binding                                                     | 0.212 | 0.212 | 1.00 |
| P47131 | TMEM14 protein homolog YJR085C [OS=Saccharomyces cerevisiae S288c]                             | 853547  | YJR085C; YJR085C     |                                                                                                          | membrane;mitochondrion                   |                                                                                        | 0.778 | 0.778 | 1.00 |

|          |                                                                                                    |        |                         |                                                                                                                    |                                                                        |                                                   |       |       |      |
|----------|----------------------------------------------------------------------------------------------------|--------|-------------------------|--------------------------------------------------------------------------------------------------------------------|------------------------------------------------------------------------|---------------------------------------------------|-------|-------|------|
| P53320   | Mitochondrial carrier protein MTM1 [OS=Saccharomyces cerevisiae S288c]                             | 853173 | MTM1; YGR257C           | metabolic process;transport                                                                                        | membrane;mitochondrion                                                 | structural molecule activity                      | 0.11  | 0.11  | 1.00 |
| Q3E6R5   | uncharacterized mitochondrial outer membrane protein YDR381C-A [OS=Saccharomyces cerevisiae S288c] | 851989 | YDR381C-A; YDR381C-A    |                                                                                                                    | membrane;mitochondrion                                                 |                                                   | 0.389 | 0.389 | 1.00 |
| P32463   | Acyl carrier protein, mitochondrial [OS=Saccharomyces cerevisiae S288c]                            | 853642 | ACP1; YKL192C           | metabolic process;transport                                                                                        | mitochondrion                                                          |                                                   | 0.259 | 0.259 | 1.00 |
| P40581   | peroxiredoxin HYR1 [OS=Saccharomyces cerevisiae S288c]                                             | 854855 | HYR1; YIR037W           | metabolic process;response to stimulus                                                                             | cytoplasm;cytosol;mitochondrion;organelle lumen                        | antioxidant activity;catalytic activity           | 0.259 | 0.259 | 1.00 |
| Q08058   | Coenzyme Q-binding protein COQ10, mitochondrial [OS=Saccharomyces cerevisiae S288c]                | 854154 | COQ10; YOL008W          | metabolic process                                                                                                  | membrane;mitochondrion                                                 |                                                   | 0.194 | 0.194 | 1.00 |
| Q07821   | Iron-sulfur assembly protein 1 [OS=Saccharomyces cerevisiae S288c]                                 | 850632 | ISA1; YLL027W           | cell organization and biogenesis;metabolic process                                                                 | mitochondrion;organelle lumen                                          | metal ion binding;structural molecule activity    | 0.136 | 0.136 | 1.00 |
| P40033   | 37S ribosomal protein rsm18, mitochondrial [OS=Saccharomyces cerevisiae S288c]                     | 856776 | RSM18; YER050C          | cell organization and biogenesis;metabolic process                                                                 | mitochondrion;ribosome                                                 | structural molecule activity                      | 0.585 | 0.585 | 1.00 |
| Q08645   | folypolyglutamate synthase [OS=Saccharomyces cerevisiae S288c]                                     | 854415 | MET7; YOR241W           | metabolic process                                                                                                  | cytoplasm;endoplasmic reticulum;membrane;mitochondrion;organelle lumen | catalytic activity;nucleotide binding             | 0.15  | 0.15  | 1.00 |
| Q12328   | Mitochondrial import inner membrane translocase subunit TIM22 [OS=Saccharomyces cerevisiae S288c]  | 851309 | TIM22; YDL217C          | cell organization and biogenesis;transport                                                                         | cytosol;membrane;mitochondrion                                         | protein binding;transporter activity              | 0.233 | 0.233 | 1.00 |
| P40990   | Protein MSS2, mitochondrial [OS=Saccharomyces cerevisiae S288c]                                    | 851451 | MSS2; YDL107W           | cell organization and biogenesis                                                                                   | membrane;mitochondrion;organelle lumen                                 | protein binding                                   | 0.101 | 0.101 | 1.00 |
| P04039   | Cytochrome c oxidase polypeptide VIII, mitochondrial [OS=Saccharomyces cerevisiae S288c]           | 851111 | COX8; YLR395C           | metabolic process;transport                                                                                        | membrane;mitochondrion                                                 | catalytic activity;transporter activity           | 0.778 | 0.778 | 1.00 |
| P38812   | Phosphatidylglycerophosphate GEP4, mitochondrial [OS=Saccharomyces cerevisiae S288c]               | 856500 | GEP4; YHR100C           | metabolic process                                                                                                  | membrane;mitochondrion;organelle lumen                                 | catalytic activity                                | 0.179 | 0.179 | 1.00 |
| P10174   | cytochrome c oxidase subunit 7 [OS=Saccharomyces cerevisiae S288c]                                 | 855298 | COX7; YMR256C           | metabolic process;transport                                                                                        | membrane;mitochondrion                                                 | catalytic activity;transporter activity           | 1.154 | 1.154 | 1.00 |
| P39515   | mitochondrial import inner membrane translocase subunit Tim17 [OS=Saccharomyces cerevisiae S288c]  | 853298 | TIM17; YJL143W          | cell organization and biogenesis;transport                                                                         | membrane;mitochondrion                                                 | protein binding;transporter activity              | 0.778 | 0.778 | 1.00 |
| P53733   | 37S ribosomal protein S19, mitochondrial [OS=Saccharomyces cerevisiae S288c]                       | 855773 | RSM19; YNR037C          | cell organization and biogenesis;metabolic process                                                                 | mitochondrion;ribosome                                                 | RNA binding;structural molecule activity          | 0.931 | 0.931 | 1.00 |
| P07263-1 | Histidine--tRNA ligase, mitochondrial [OS=Saccharomyces cerevisiae S288c]                          | 856145 | HTS1; YPR033C           | cell organization and biogenesis;metabolic process                                                                 | cytoplasm;mitochondrion                                                | catalytic activity;nucleotide binding;RNA binding | 0.064 | 0.064 | 1.00 |
| P47051   | putative lipote-protein ligase A [OS=Saccharomyces cerevisiae S288c]                               | 853401 | AIM22; YJL046W          | metabolic process                                                                                                  | mitochondrion                                                          | catalytic activity;nucleotide binding             | 0.089 | 0.089 | 1.00 |
| Q12487   | 54S ribosomal protein L23, mitochondrial [OS=Saccharomyces cerevisiae S288c]                       | 854321 | MRPL23; YOR150W         | cell organization and biogenesis;metabolic process                                                                 | mitochondrion;ribosome;vacuole                                         | RNA binding;structural molecule activity          | 0.233 | 0.233 | 1.00 |
| P25270   | rRNA methyltransferase 1, mitochondrial [OS=Saccharomyces cerevisiae S288c]                        | 854376 | MRM1; YOR201C           | metabolic process                                                                                                  | mitochondrion                                                          | catalytic activity;RNA binding                    | 0.129 | 0.129 | 1.00 |
| P39940   | E3 ubiquitin-protein ligase RSP5 [OS=Saccharomyces cerevisiae S288c]                               | 856862 | RSP5; YER125W           | cell organization and biogenesis;metabolic process;regulation of biological process;response to stimulus;transport | cytoplasm;cytoskeleton;Golgi;membrane;mitochondrion;nucleus            | catalytic activity;protein binding                | 0.044 | 0.044 | 1.00 |
| Q04598   | 54S ribosomal protein L34, mitochondrial [OS=Saccharomyces cerevisiae S288c]                       | 851692 | YDR115W; MRX14; YDR115W | cell organization and biogenesis;metabolic process                                                                 | cytoplasm;mitochondrion;nucleus;ribosome                               | structural molecule activity                      | 0.468 | 0.468 | 1.00 |
| P14693   | sorting assembly machinery 35 kDa subunit [OS=Saccharomyces cerevisiae S288c]                      | 856483 | SAM35; YHR083W          | cell organization and biogenesis;transport                                                                         | membrane;mitochondrion                                                 | protein binding                                   | 0.334 | 0.334 | 1.00 |
| P25578   | CDP-diacylglycerol--glycerol-3-phosphate 3-phosphatidyltransferase                                 | 850352 | PGS1; YCL004W           | metabolic process                                                                                                  | mitochondrion                                                          | catalytic activity;nucleotide binding             | 0.083 | 0.083 | 1.00 |

|          |                                                                                              |        |                  |                                                                                                  |                                                        |                                                                           |        |        |      |
|----------|----------------------------------------------------------------------------------------------|--------|------------------|--------------------------------------------------------------------------------------------------|--------------------------------------------------------|---------------------------------------------------------------------------|--------|--------|------|
|          | [OS=Saccharomyces cerevisiae S288c]                                                          |        |                  |                                                                                                  |                                                        |                                                                           |        |        |      |
| P36064   | COX assembly mitochondrial protein [OS=Saccharomyces cerevisiae S288c]                       | 853721 | CMC1; YKL137W    | cell organization and biogenesis                                                                 | membrane;mitochondrion                                 | metal ion binding                                                         | 0.389  | 0.389  | 1.00 |
| P39518   | Long-chain-fatty-acid--CoA ligase 2 [OS=Saccharomyces cerevisiae S288c]                      | 856734 | FAA2; YER015W    | metabolic process;transport                                                                      | cytoplasm;mitochondrion                                | catalytic activity;nucleotide binding                                     | 0.055  | 0.055  | 1.00 |
| P87275   | Altered inheritance of mitochondria protein 11 [OS=Saccharomyces cerevisiae S288c]           | 856829 | AIM11; YER093C-A |                                                                                                  | membrane;mitochondrion                                 |                                                                           | 0.389  | 0.389  | 1.00 |
| Q06405   | ATP synthase subunit f, mitochondrial [OS=Saccharomyces cerevisiae S288c]                    | 851983 | ATP17; YDR377W   | metabolic process;transport                                                                      | membrane;mitochondrion                                 | catalytic activity;transporter activity                                   | 1.512  | 1.512  | 1.00 |
| Q02863   | ubiquitin carboxyl-terminal hydrolase 16 [OS=Saccharomyces cerevisiae S288c]                 | 856032 | UBP16; YPL072W   | metabolic process                                                                                | membrane;mitochondrion                                 | catalytic activity                                                        | 0.072  | 0.072  | 1.00 |
| P00045   | Cytochrome c iso-2 [OS=Saccharomyces cerevisiae S288c]                                       | 856672 | CYC7; YEL039C    | metabolic process;transport                                                                      | mitochondrion                                          | metal ion binding                                                         | 0.259  | 0.259  | 1.00 |
| P39722   | Mitochondrial Rho GTPase 1 [OS=Saccharomyces cerevisiae S288c]                               | 851249 | GEM1; YAL048C    | cell organization and biogenesis;regulation of biological process;response to stimulus;transport | membrane;mitochondrion                                 | catalytic activity;metal ion binding;nucleotide binding                   | 0.059  | 0.059  | 1.00 |
| P39103   | Cytochrome c oxidase assembly protein COX14 [OS=Saccharomyces cerevisiae S288c]              | 854910 | COX14; YML129C   | cell organization and biogenesis;regulation of biological process                                | membrane;mitochondrion;organelle lumen                 | protein binding                                                           | 0.585  | 0.585  | 1.00 |
| Q06011   | Protein ECM19 [OS=Saccharomyces cerevisiae S288c]                                            | 851106 | ECM19; YLR390W   | cell organization and biogenesis                                                                 | membrane;mitochondrion                                 |                                                                           | 0.468  | 0.468  | 1.00 |
| P40458   | Autophagy-related protein 32 [OS=Saccharomyces cerevisiae S288c]                             | 854660 | ATG32; YIL146C   | metabolic process                                                                                | membrane;mitochondrion;vacuole                         | protein binding                                                           | 0.096  | 0.096  | 1.00 |
| P39724   | Altered inheritance of mitochondria protein 1 [OS=Saccharomyces cerevisiae S288c]            | 851251 | AIM1; YAL046C    |                                                                                                  |                                                        |                                                                           | 0.334  | 0.334  | 1.00 |
| P38909   | cytochrome c mitochondrial import factor CYC2 [OS=Saccharomyces cerevisiae S288c]            | 854202 | CYC2; YOR037W    | cell organization and biogenesis;metabolic process                                               | membrane;mitochondrion                                 | catalytic activity                                                        | 0.093  | 0.093  | 1.00 |
| P09440   | C-1-tetrahydrofolate synthase, mitochondrial [OS=Saccharomyces cerevisiae S288c]             | 852378 | MIS1; YBR084W    | metabolic process                                                                                | cytosol;mitochondrion                                  | catalytic activity;nucleotide binding                                     | 1.668  | 1.771  | 1.06 |
| P06208-1 | 2-isopropylmalate synthase [OS=Saccharomyces cerevisiae S288c]                               | 855619 | LEU4; YNL104C    | metabolic process                                                                                | cytoplasm;mitochondrion                                | catalytic activity;protein binding                                        | 9      | 9.608  | 1.07 |
| P32454   | Aminopeptidase 2, mitochondrial [OS=Saccharomyces cerevisiae S288c]                          | 853699 | APE2; YKL157W    | metabolic process                                                                                | cytoplasm;extracellular;membrane;mitochondrion;nucleus | catalytic activity;metal ion binding                                      | 1.209  | 1.294  | 1.07 |
| P30624   | Long-chain-fatty-acid--CoA ligase 1 [OS=Saccharomyces cerevisiae S288c]                      | 854495 | FAA1; YOR317W    | metabolic process;transport                                                                      | endoplasmic reticulum;membrane;mitochondrion           | catalytic activity;nucleotide binding                                     | 3.024  | 3.245  | 1.07 |
| P40215   | External NADH-ubiquinone oxidoreductase 1, mitochondrial [OS=Saccharomyces cerevisiae S288c] | 855176 | NDE1; YMR145C    | metabolic process                                                                                | mitochondrion                                          | catalytic activity;nucleotide binding                                     | 5.469  | 5.884  | 1.08 |
| P07806   | Valine--tRNA ligase, mitochondrial [OS=Saccharomyces cerevisiae S288c]                       | 852986 | VAS1; YGR094W    | metabolic process;regulation of biological process                                               | cytoplasm;cytosol;mitochondrion                        | catalytic activity;nucleotide binding                                     | 0.722  | 0.778  | 1.08 |
| P21954   | Isocitrate dehydrogenase [NADP], mitochondrial [OS=Saccharomyces cerevisiae S288c]           | 851493 | IDP1; YDL066W    | metabolic process                                                                                | mitochondrion                                          | catalytic activity;metal ion binding;nucleotide binding;protein binding   | 35.869 | 38.811 | 1.08 |
| P08417   | fumarate hydratase, mitochondrial [OS=Saccharomyces cerevisiae S288c]                        | 855866 | FUM1; YPL262W    | cell organization and biogenesis;metabolic process                                               | cytoplasm;cytosol;mitochondrion;organelle lumen        | catalytic activity                                                        | 13.874 | 15.103 | 1.09 |
| P39987   | Heat shock protein SSC3, mitochondrial [OS=Saccharomyces cerevisiae S288c]                   | 856682 | ECM10; YEL030W   | cell organization and biogenesis;metabolic process;transport                                     | mitochondrion                                          | nucleotide binding;protein binding                                        | 2.162  | 2.36   | 1.09 |
| P07256   | Cytochrome b-c1 complex subunit 1, mitochondrial [OS=Saccharomyces cerevisiae S288c]         | 852235 | COR1; YBL045C    | metabolic process;transport                                                                      | membrane;mitochondrion                                 | catalytic activity;metal ion binding;protein binding;transporter activity | 18.783 | 20.544 | 1.09 |
| P07257   | Cytochrome b-c1 complex subunit 2, mitochondrial [OS=Saccharomyces cerevisiae S288c]         | 856321 | QCR2; YPR191W    | metabolic process;transport                                                                      | membrane;mitochondrion                                 | catalytic activity;metal ion binding;protein binding                      | 33.551 | 36.751 | 1.10 |



|        |                                                                                                               |        |                |                                                                                                                           |                                                       |                                                                                        |         |         |      |
|--------|---------------------------------------------------------------------------------------------------------------|--------|----------------|---------------------------------------------------------------------------------------------------------------------------|-------------------------------------------------------|----------------------------------------------------------------------------------------|---------|---------|------|
|        | cerevisiae S288c]                                                                                             |        |                |                                                                                                                           |                                                       | binding;transporter activity                                                           |         |         |      |
| P16547 | Mitochondrial outer membrane protein OM45 [OS=Saccharomyces cerevisiae S288c]                                 | 854670 | OM45; YIL136W  |                                                                                                                           | membrane;mitochondrion                                |                                                                                        | 274.423 | 300.995 | 1.10 |
| P54783 | D-arabinono-1,4-lactone oxidase [OS=Saccharomyces cerevisiae S288c]                                           | 854888 | ALO1; YML086C  | metabolic process;response to stimulus                                                                                    | membrane;mitochondrion                                | catalytic activity;nucleotide binding                                                  | 3.299   | 3.642   | 1.10 |
| P16451 | Pyruvate dehydrogenase complex protein X component, mitochondrial [OS=Saccharomyces cerevisiae S288c]         | 853107 | PDX1; YGR193C  | metabolic process                                                                                                         | mitochondrion;organelle lumen                         | catalytic activity;structural molecule activity                                        | 4.055   | 4.505   | 1.11 |
| P53982 | isocitrate dehydrogenase [NADP] [OS=Saccharomyces cerevisiae S288c]                                           | 855723 | IDP3; YNL009W  | metabolic process                                                                                                         | cytoplasm;mitochondrion                               | catalytic activity;metal ion binding;nucleotide binding                                | 1.943   | 2.162   | 1.11 |
| Q05931 | Heat shock protein SSQ1, mitochondrial [OS=Saccharomyces cerevisiae S288c]                                    | 851084 | SSQ1; YLR369W  | cell organization and biogenesis;metabolic process                                                                        | mitochondrion;organelle lumen                         | nucleotide binding;protein binding                                                     | 0.995   | 1.113   | 1.12 |
| P38077 | ATP synthase subunit gamma, mitochondrial [OS=Saccharomyces cerevisiae S288c]                                 | 852327 | ATP3; YBR039W  | metabolic process;transport                                                                                               | membrane;mitochondrion                                | catalytic activity;transporter activity                                                | 11.328  | 12.689  | 1.12 |
| P25374 | Cysteine desulfurase, mitochondrial [OS=Saccharomyces cerevisiae S288c]                                       | 850343 | NFS1; YCL017C  | cell organization and biogenesis;cellular homeostasis;metabolic process                                                   | mitochondrion;nucleus                                 | catalytic activity;metal ion binding;protein binding                                   | 2.594   | 2.914   | 1.12 |
| P38071 | Enoyl-[acyl-carrier protein] reductase [NADPH, B-specific], mitochondrial [OS=Saccharomyces cerevisiae S288c] | 852314 | ETR1; YBR026C  | metabolic process                                                                                                         | mitochondrion;organelle lumen                         | catalytic activity;DNA binding;metal ion binding                                       | 7.111   | 8.006   | 1.13 |
| P01120 | Ras-like protein 2 [OS=Saccharomyces cerevisiae S288c]                                                        | 855625 | RAS2; YNL098C  | cell communication;cell differentiation;metabolic process;regulation of biological process;response to stimulus;transport | membrane;mitochondrion;nucleus                        | catalytic activity;nucleotide binding;protein binding                                  | 4.484   | 5.062   | 1.13 |
| P16622 | Ferrochelatase, mitochondrial [OS=Saccharomyces cerevisiae S288c]                                             | 854347 | HEM15; YOR176W | metabolic process                                                                                                         | membrane;mitochondrion                                | catalytic activity                                                                     | 5.579   | 6.305   | 1.13 |
| P48527 | Tyrosine--tRNA ligase, mitochondrial [OS=Saccharomyces cerevisiae S288c]                                      | 856007 | MSY1; YPL097W  | metabolic process                                                                                                         | cytoplasm;cytosol;mitochondrion;organelle lumen       | catalytic activity;nucleotide binding;RNA binding                                      | 1.154   | 1.31    | 1.14 |
| Q04458 | Fatty aldehyde dehydrogenase HFD1 [OS=Saccharomyces cerevisiae S288c]                                         | 855137 | HFD1; YMR110C  | metabolic process                                                                                                         | endoplasmic reticulum;endosome;membrane;mitochondrion | catalytic activity                                                                     | 1.783   | 2.03    | 1.14 |
| P53266 | Cytochrome oxidase assembly protein SHY1 [OS=Saccharomyces cerevisiae S288c]                                  | 853009 | SHY1; YGR112W  | cell organization and biogenesis                                                                                          | membrane;mitochondrion                                | protein binding                                                                        | 1.783   | 2.03    | 1.14 |
| P27929 | 37S ribosomal protein NAM9, mitochondrial [OS=Saccharomyces cerevisiae S288c]                                 | 855585 | NAM9; YNL137C  | cell organization and biogenesis;metabolic process;regulation of biological process                                       | mitochondrion;ribosome                                | RNA binding;structural molecule activity                                               | 0.931   | 1.062   | 1.14 |
| P43567 | alanine-glyoxylate aminotransferase 1 [OS=Saccharomyces cerevisiae S288c]                                     | 850514 | AGX1; YFL030W  | metabolic process                                                                                                         | cytosol;mitochondrion                                 | catalytic activity                                                                     | 2.481   | 2.831   | 1.14 |
| P38988 | Mitochondrial GTP/GDP carrier protein 1 [OS=Saccharomyces cerevisiae S288c]                                   | 851329 | GGC1; YDL198C  | cell organization and biogenesis;cellular homeostasis;metabolic process;transport                                         | membrane;mitochondrion                                | structural molecule activity;transporter activity                                      | 3.642   | 4.179   | 1.15 |
| P43616 | Cys-Gly metallopeptidase dug1 [OS=Saccharomyces cerevisiae S288c]                                             | 850605 | DUG1; YFR044C  | metabolic process                                                                                                         | cytoplasm;mitochondrion;ribosome                      | catalytic activity;metal ion binding                                                   | 1.154   | 1.326   | 1.15 |
| P28817 | 3-hydroxyisobutyryl-CoA hydrolase, mitochondrial [OS=Saccharomyces cerevisiae S288c]                          | 851606 | EHD3; YDR036C  | metabolic process                                                                                                         | mitochondrion                                         | catalytic activity                                                                     | 1.212   | 1.395   | 1.15 |
| Q12480 | Probable electron transfer flavoprotein subunit alpha, mitochondrial [OS=Saccharomyces cerevisiae S288c]      | 856112 | AIM45; YPR004C | metabolic process;transport                                                                                               | mitochondrion;organelle lumen                         | catalytic activity;nucleotide binding                                                  | 3.467   | 4.012   | 1.16 |
| P10662 | 37S ribosomal protein MRP1, mitochondrial [OS=Saccharomyces cerevisiae S288c]                                 | 851948 | MRP1; YDR347W  | cell organization and biogenesis;metabolic process;response to stimulus                                                   | mitochondrion;ribosome                                | antioxidant activity;catalytic activity;metal ion binding;structural molecule activity | 2.981   | 3.467   | 1.16 |
| P39525 | 3-oxoacyl-[acyl-carrier-protein] synthase homolog [OS=Saccharomyces cerevisiae S288c]                         | 856790 | CEM1; YER061C  | metabolic process                                                                                                         | mitochondrion                                         | catalytic activity                                                                     | 1.848   | 2.162   | 1.17 |

|        |                                                                                                                                             |        |                      |                                                                                     |                                                  |                                                             |        |        |      |
|--------|---------------------------------------------------------------------------------------------------------------------------------------------|--------|----------------------|-------------------------------------------------------------------------------------|--------------------------------------------------|-------------------------------------------------------------|--------|--------|------|
| P12687 | 54S ribosomal protein L2, mitochondrial [OS=Saccharomyces cerevisiae S288c]                                                                 | 855727 | MRP7; YNL005C        | cell organization and biogenesis;metabolic process                                  | mitochondrion;ribosome                           | catalytic activity;RNA binding;structural molecule activity | 1.848  | 2.162  | 1.17 |
| P53881 | 54S ribosomal protein L22, mitochondrial [OS=Saccharomyces cerevisiae S288c]                                                                | 855544 | MRPL22; YNL177C      | cell organization and biogenesis;metabolic process                                  | mitochondrion;ribosome                           | RNA binding;structural molecule activity                    | 1.994  | 2.34   | 1.17 |
| Q12230 | Sphingolipid long chain base-responsive protein LSP1 [OS=Saccharomyces cerevisiae S288c]                                                    | 856103 | LSP1; YPL004C        | regulation of biological process;response to stimulus;transport                     | cytoplasm;membrane;mitochondrion                 |                                                             | 14.849 | 17.478 | 1.18 |
| P12695 | Dihydropolyllysine-residue acetyltransferase component of pyruvate dehydrogenase complex, mitochondrial [OS=Saccharomyces cerevisiae S288c] | 855653 | LAT1; YNL071W        | metabolic process                                                                   | mitochondrion;organelle lumen                    | catalytic activity                                          | 7.003  | 8.284  | 1.18 |
| P36112 | MICOS complex subunit Mic60 [OS=Saccharomyces cerevisiae S288c]                                                                             | 853886 | FCJ1; MIC60; YKR016W | cell organization and biogenesis;transport                                          | membrane;mitochondrion                           |                                                             | 12.895 | 15.379 | 1.19 |
| Q08223 | Altered inheritance of mitochondria protein 39, mitochondrial [OS=Saccharomyces cerevisiae S288c]                                           | 854103 | AIM39; YOL053W       |                                                                                     | cytosol;membrane;mitochondrion                   |                                                             | 0.711  | 0.848  | 1.19 |
| Q02486 | ARS-binding factor 2, mitochondrial [OS=Saccharomyces cerevisiae S288c]                                                                     | 855094 | ABF2; YMR072 W       | cell organization and biogenesis;metabolic process;regulation of biological process | chromosome;mitochondrion;nucleus                 | DNA binding                                                 | 69.17  | 82.768 | 1.20 |
| P38885 | Altered inheritance of mitochondria protein 46, mitochondrial [OS=Saccharomyces cerevisiae S288c]                                           | 856606 | AIM46; YHR199C       |                                                                                     | mitochondrion                                    | catalytic activity                                          | 1.404  | 1.683  | 1.20 |
| P22136 | ATPase expression protein 2, mitochondrial [OS=Saccharomyces cerevisiae S288c]                                                              | 855325 | AEP2; YMR282C        | metabolic process;regulation of biological process                                  | mitochondrion                                    | RNA binding                                                 | 0.359  | 0.431  | 1.20 |
| P39002 | long-chain-fatty-acid--CoA ligase 3 [OS=Saccharomyces cerevisiae S288c]                                                                     | 854808 | FAA3; YIL009W        | metabolic process                                                                   |                                                  | catalytic activity;nucleotide binding                       | 0.413  | 0.496  | 1.20 |
| Q08818 | Meiotic sister-chromatid recombination protein 6, mitochondrial [OS=Saccharomyces cerevisiae S288c]                                         | 854536 | MSC6; YOR354C        | metabolic process                                                                   | mitochondrion;organelle lumen                    | RNA binding                                                 | 1.154  | 1.387  | 1.20 |
| P02992 | elongation factor Tu, mitochondrial [OS=Saccharomyces cerevisiae S288c]                                                                     | 854359 | TUF1; YOR187 W       | cell organization and biogenesis;metabolic process                                  | mitochondrion                                    | catalytic activity;nucleotide binding;RNA binding           | 23.245 | 27.943 | 1.20 |
| P49367 | Homoaconitase, mitochondrial [OS=Saccharomyces cerevisiae S288c]                                                                            | 851820 | LYS4; YDR234 W       | metabolic process                                                                   | mitochondrion                                    | catalytic activity;metal ion binding;protein binding        | 1.276  | 1.54   | 1.21 |
| Q12320 | Hydroxyacylglutathione hydrolase, mitochondrial [OS=Saccharomyces cerevisiae S288c]                                                         | 854205 | GLO4; YOR040 W       | metabolic process                                                                   | mitochondrion;organelle lumen                    | catalytic activity;metal ion binding                        | 1.081  | 1.31   | 1.21 |
| P08067 | cytochrome b-c1 complex subunit Rieske, mitochondrial [OS=Saccharomyces cerevisiae S288c]                                                   | 856689 | RIP1; YEL024W        | metabolic process;transport                                                         | membrane;mitochondrion                           | catalytic activity;metal ion binding;transporter activity   | 55.234 | 67.129 | 1.22 |
| P25719 | Peptidyl-prolyl cis-trans isomerase C, mitochondrial [OS=Saccharomyces cerevisiae S288c]                                                    | 854897 | CPR3; YML078 W       | cell death;metabolic process                                                        | mitochondrion;organelle lumen                    | catalytic activity                                          | 2.981  | 3.642  | 1.22 |
| Q03798 | Altered inheritance of mitochondria protein 36, mitochondrial [OS=Saccharomyces cerevisiae S288c]                                           | 855189 | AIM36; YMR157C       |                                                                                     | membrane;mitochondrion                           |                                                             | 1.336  | 1.637  | 1.23 |
| P17558 | 37S ribosomal protein PET123, mitochondrial [OS=Saccharomyces cerevisiae S288c]                                                             | 854329 | PET123; YOR158 W     | cell organization and biogenesis;metabolic process                                  | mitochondrion;ribosome                           | structural molecule activity                                | 1.448  | 1.783  | 1.23 |
| P04037 | cytochrome c oxidase subunit 4, mitochondrial [OS=Saccharomyces cerevisiae S288c]                                                           | 852688 | COX4; YGL187C        | cell organization and biogenesis;metabolic process;transport                        | membrane;mitochondrion                           | catalytic activity;metal ion binding;transporter activity   | 34.112 | 42.288 | 1.24 |
| P38705 | Serine--tRNA ligase, mitochondrial [OS=Saccharomyces cerevisiae S288c]                                                                      | 856402 | DIA4; YHR011 W       | metabolic process                                                                   | cytoplasm;mitochondrion;organelle lumen          | catalytic activity;nucleotide binding                       | 0.417  | 0.52   | 1.25 |
| P48360 | Probable NADPH:adrenodoxin oxidoreductase, mitochondrial [OS=Saccharomyces cerevisiae S288c]                                                | 851982 | ARH1; YDR376 W       | cellular homeostasis;metabolic process;transport                                    | cytoplasm;membrane;mitochondrion;organelle lumen | catalytic activity                                          | 0.45   | 0.562  | 1.25 |

|        |                                                                                                      |        |                 |                                                                              |                                        |                                                         |       |       |      |
|--------|------------------------------------------------------------------------------------------------------|--------|-----------------|------------------------------------------------------------------------------|----------------------------------------|---------------------------------------------------------|-------|-------|------|
| Q04599 | 54S ribosomal protein L1, mitochondrial [OS=Saccharomyces cerevisiae S288c]                          | 851694 | MRPL1; YDR116C  | cell organization and biogenesis;metabolic process                           | mitochondrion;ribosome                 | RNA binding;structural molecule activity                | 1.069 | 1.336 | 1.25 |
| P19516 | Cytochrome c oxidase assembly protein COX11, mitochondrial [OS=Saccharomyces cerevisiae S288c]       | 855971 | COX11; YPL132W  | cell organization and biogenesis;metabolic process                           | membrane;mitochondrion;ribosome        | metal ion binding                                       | 1.069 | 1.336 | 1.25 |
| P39006 | Phosphatidylserine decarboxylase proenzyme 1, mitochondrial [OS=Saccharomyces cerevisiae S288c]      | 855552 | PSD1; YNL169C   | metabolic process;regulation of biological process                           | membrane;mitochondrion                 | catalytic activity                                      | 0.487 | 0.61  | 1.25 |
| P36046 | Mitochondrial intermembrane space import and assembly protein 40 [OS=Saccharomyces cerevisiae S288c] | 853639 | MIA40; YKL195W  | cellular component movement;metabolic process;response to stimulus;transport | membrane;mitochondrion                 | catalytic activity;protein binding;transporter activity | 2.3   | 2.914 | 1.27 |
| P37267 | Assembly factor cbp4 [OS=Saccharomyces cerevisiae S288c]                                             |        |                 | cell organization and biogenesis                                             | membrane;mitochondrion                 |                                                         | 5.579 | 7.111 | 1.27 |
| P32335 | Protein MSS51, mitochondrial [OS=Saccharomyces cerevisiae S288c]                                     | 850900 | MSS51; YLR203C  | metabolic process;regulation of biological process                           | membrane;mitochondrion                 | protein binding;translation regulator activity          | 1.512 | 1.929 | 1.28 |
| P14908 | Mitochondrial transcription factor 1 [OS=Saccharomyces cerevisiae S288c]                             | 855268 | MTF1; YMR228 W  | metabolic process;regulation of biological process                           | mitochondrion;organelle lumen          | catalytic activity;DNA binding;RNA binding              | 0.778 | 0.995 | 1.28 |
| P25375 | Saccharolysin [OS=Saccharomyces cerevisiae S288c]                                                    | 850301 | PRD1; YCL057W   | metabolic process                                                            | cytoplasm;Golgi;mitochondrion;vacuole  | catalytic activity;metal ion binding                    | 0.216 | 0.278 | 1.29 |
| P11914 | Mitochondrial-processing peptidase subunit alpha [OS=Saccharomyces cerevisiae S288c]                 | 856419 | MAS2; YHR024C   | metabolic process;transport                                                  | membrane;mitochondrion;organelle lumen | catalytic activity;metal ion binding;protein binding    | 2.311 | 2.981 | 1.29 |
| Q04935 | Cytochrome c oxidase protein 20, mitochondrial [OS=Saccharomyces cerevisiae S288c]                   | 851817 | COX20; YDR231C  | cell organization and biogenesis;metabolic process                           | membrane;mitochondrion                 | protein binding                                         | 1.894 | 2.455 | 1.30 |
| P42847 | 37S ribosomal protein S18, mitochondrial [OS=Saccharomyces cerevisiae S288c]                         | 855410 | MRPS18; YNL306W | cell organization and biogenesis;metabolic process                           | mitochondrion;ribosome                 | RNA binding;structural molecule activity                | 1.054 | 1.371 | 1.30 |
| P53969 | Sorting assembly machinery 50 kDa subunit [OS=Saccharomyces cerevisiae S288c]                        | 855705 | SAM50; YNL026W  | cell organization and biogenesis;transport                                   | membrane;mitochondrion                 | protein binding;transporter activity                    | 0.374 | 0.487 | 1.30 |
| P07213 | Mitochondrial import receptor subunit TOM70 [OS=Saccharomyces cerevisiae S288c]                      | 855602 | TOM70; YNL121C  | cell organization and biogenesis;transport                                   | membrane;mitochondrion                 | protein binding;transporter activity                    | 1.728 | 2.257 | 1.31 |
| Q01852 | Mitochondrial import inner membrane translocase subunit TIM44 [OS=Saccharomyces cerevisiae S288c]    | 854790 | TIM44; YIL022W  | transport                                                                    | membrane;mitochondrion                 | nucleotide binding;protein binding                      | 4.125 | 5.404 | 1.31 |
| P07266 | Mitochondrial RNA-splicing protein MRS1 [OS=Saccharomyces cerevisiae S288c]                          | 854839 | MRS1; YIR021W   | cell organization and biogenesis;metabolic process                           | mitochondrion;organelle lumen          | catalytic activity;DNA binding;RNA binding              | 0.425 | 0.557 | 1.31 |
| Q03327 | Mitochondrial fusion and transport protein Ugo1 [OS=Saccharomyces cerevisiae S288c]                  | 852081 | UGO1; YDR470C   | cell organization and biogenesis;metabolic process                           | membrane;mitochondrion                 | protein binding;structural molecule activity            | 0.425 | 0.557 | 1.31 |
| Q08968 | UPF0061 protein FMP40 [OS=Saccharomyces cerevisiae S288c]                                            | 855879 | FMP40; YPL222W  |                                                                              | mitochondrion                          | protein binding                                         | 2.495 | 3.27  | 1.31 |
| Q02776 | Mitochondrial import inner membrane translocase subunit TIM50 [OS=Saccharomyces cerevisiae S288c]    | 856042 | TIM50; YPL063W  | cell organization and biogenesis;metabolic process;transport                 | membrane;mitochondrion                 | catalytic activity;protein binding;transporter activity | 7.483 | 9.857 | 1.32 |
| P36528 | 54S ribosomal protein L17, mitochondrial [OS=Saccharomyces cerevisiae S288c]                         | 855469 | MRPL17; YNL252C | cell organization and biogenesis;metabolic process                           | mitochondrion;ribosome                 | structural molecule activity                            | 0.52  | 0.688 | 1.32 |
| P36163 | mitochondrial metalloendopeptidase OMA1 [OS=Saccharomyces cerevisiae S288c]                          | 853962 | OMA1; YKR087C   | metabolic process                                                            | membrane;mitochondrion                 | catalytic activity;metal ion binding                    | 0.551 | 0.73  | 1.32 |
| Q03799 | 37S ribosomal protein S8, mitochondrial [OS=Saccharomyces cerevisiae S288c]                          | 855190 | MRPS8; YMR158 W | cell organization and biogenesis;metabolic process                           | mitochondrion;ribosome                 | structural molecule activity                            | 1.424 | 1.894 | 1.33 |
| Q12283 | Malonyl CoA-acyl carrier protein transacylase, mitochondrial [OS=Saccharomyces cerevisiae S288c]     | 854396 | MCT1; YOR221C   | metabolic process                                                            | mitochondrion                          | catalytic activity                                      | 0.668 | 0.896 | 1.34 |

|        |                                                                                                    |        |                      |                                                                                                                               |                                         |                                                         |       |        |      |
|--------|----------------------------------------------------------------------------------------------------|--------|----------------------|-------------------------------------------------------------------------------------------------------------------------------|-----------------------------------------|---------------------------------------------------------|-------|--------|------|
| P00424 | Cytochrome c oxidase polypeptide 5A, mitochondrial [OS=Saccharomyces cerevisiae S288c]             | 855675 | COX5A; YNL052W       | metabolic process;transport                                                                                                   | membrane;mitochondrion                  | catalytic activity;transporter activity                 | 1.848 | 2.511  | 1.36 |
| Q03713 | Respiratory supercomplex factor 1, mitochondrial [OS=Saccharomyces cerevisiae S288c]               | 854978 | RCF1; YML030W        | cell organization and biogenesis                                                                                              | membrane;mitochondrion                  |                                                         | 2.162 | 2.981  | 1.38 |
| P07236 | Threonine--tRNA ligase, mitochondrial [OS=Saccharomyces cerevisiae S288c]                          | 853640 | MST1; YKL194C        | metabolic process                                                                                                             | cytoplasm;mitochondrion;organelle lumen | catalytic activity;nucleotide binding;RNA binding       | 0.233 | 0.322  | 1.38 |
| P36066 | Protein MRG3-like [OS=Saccharomyces cerevisiae S288c]                                              | 853725 | YKL133C; YKL133C     | metabolic process                                                                                                             | membrane;mitochondrion                  | protein binding                                         | 0.655 | 0.911  | 1.39 |
| P18900 | hexaprenyl pyrophosphate synthase, mitochondrial [OS=Saccharomyces cerevisiae S288c]               | 852288 | COQ1; YBR003W        | metabolic process                                                                                                             | membrane;mitochondrion                  | catalytic activity;metal ion binding;protein binding    | 0.711 | 0.995  | 1.40 |
| Q02784 | Monothiol glutaredoxin-5, mitochondrial [OS=Saccharomyces cerevisiae S288c]                        | 856048 | GRX5; YPL059W        | cell organization and biogenesis;cellular homeostasis;metabolic process;regulation of biological process;response to stimulus | mitochondrion;organelle lumen           | catalytic activity;metal ion binding                    | 2.594 | 3.642  | 1.40 |
| P38341 | MICOS complex subunit MIC12 [OS=Saccharomyces cerevisiae S288c]                                    | 852566 | AIM5; MIC12; YBR262C | cell organization and biogenesis                                                                                              | membrane;mitochondrion                  |                                                         | 2.594 | 3.642  | 1.40 |
| P47015 | Altered inheritance of mitochondria protein 23, mitochondrial [OS=Saccharomyces cerevisiae S288c]  | 853310 | AIM23; YJL131C       | metabolic process                                                                                                             | mitochondrion                           | RNA binding                                             | 0.35  | 0.492  | 1.41 |
| P53140 | Protein RMD9, mitochondrial [OS=Saccharomyces cerevisiae S288c]                                    | 852771 | RMD9; YGL107C        | cell differentiation;metabolic process;regulation of biological process                                                       | membrane;mitochondrion                  | RNA binding                                             | 1.268 | 1.783  | 1.41 |
| P07342 | Acetolactate synthase catalytic subunit, mitochondrial [OS=Saccharomyces cerevisiae S288c]         | 855135 | ILV2; YMR108W        | metabolic process                                                                                                             | mitochondrion                           | catalytic activity;metal ion binding;nucleotide binding | 5.236 | 7.377  | 1.41 |
| Q04689 | Altered inheritance of mitochondria protein 32 [OS=Saccharomyces cerevisiae S288c]                 | 854955 | AIM32; YML050W       |                                                                                                                               |                                         |                                                         | 0.369 | 0.52   | 1.41 |
| P54857 | lipase 2 [OS=Saccharomyces cerevisiae S288c]                                                       | 851628 | TGL2; YDR058C        | metabolic process;transport                                                                                                   | mitochondrion                           | catalytic activity                                      | 0.369 | 0.52   | 1.41 |
| P02381 | Ribosomal protein VAR1, mitochondrial [OS=Saccharomyces cerevisiae S288c]                          | 854586 | VAR1; Q0140          | cell organization and biogenesis;metabolic process                                                                            | mitochondrion;ribosome                  | structural molecule activity                            | 1.31  | 1.848  | 1.41 |
| O14467 | multi-protein-bridging factor 1 [OS=Saccharomyces cerevisiae S288c]                                | 854474 | MBF1; YOR298C-A      | metabolic process;regulation of biological process                                                                            | cytoplasm;mitochondrion;nucleus         | DNA binding                                             | 1.31  | 1.848  | 1.41 |
| P36527 | 54S ribosomal protein L28, mitochondrial [OS=Saccharomyces cerevisiae S288c]                       | 852073 | MRPL28; YDR462W      | cell organization and biogenesis;metabolic process                                                                            | mitochondrion;ribosome                  | structural molecule activity                            | 1.31  | 1.848  | 1.41 |
| P38152 | Tricarboxylate transport protein [OS=Saccharomyces cerevisiae S288c]                               | 852594 | CTP1; YBR291C        | metabolic process;transport                                                                                                   | membrane;mitochondrion                  | structural molecule activity;transporter activity       | 0.389 | 0.551  | 1.42 |
| P28239 | Inorganic pyrophosphatase, mitochondrial [OS=Saccharomyces cerevisiae S288c]                       | 855309 | PPA2; YMR267W        | metabolic process                                                                                                             | cytoplasm;mitochondrion                 | catalytic activity;metal ion binding                    | 0.413 | 0.585  | 1.42 |
| Q12298 | uncharacterized ABC transporter ATP-binding protein YDR061W [OS=Saccharomyces cerevisiae S288c]    | 851633 | YDR061W; YDR061W     |                                                                                                                               | mitochondrion                           | catalytic activity;nucleotide binding                   | 0.425 | 0.604  | 1.42 |
| Q03976 | 37S ribosomal protein S24, mitochondrial [OS=Saccharomyces cerevisiae S288c]                       | 851755 | RSM24; YDR175C       | cell organization and biogenesis;metabolic process                                                                            | mitochondrion;ribosome                  | structural molecule activity                            | 0.905 | 1.291  | 1.43 |
| P38325 | Mitochondrial outer membrane protein OM14 [OS=Saccharomyces cerevisiae S288c]                      | 852531 | OM14; YBR230C        | transport                                                                                                                     | membrane;mitochondrion                  |                                                         | 9     | 12.895 | 1.43 |
| Q04728 | Arginine biosynthesis bifunctional protein ArgJ, mitochondrial [OS=Saccharomyces cerevisiae S288c] | 855084 | ARG7; YMR062C        | metabolic process                                                                                                             | mitochondrion;organelle lumen           | catalytic activity                                      | 1.154 | 1.656  | 1.44 |
| P38323 | ATP-dependent clpX-like chaperone, mitochondrial [OS=Saccharomyces cerevisiae S288c]               | 852528 | MCX1; YBR227C        | metabolic process                                                                                                             | membrane;mitochondrion;organelle lumen  | catalytic activity;nucleotide binding                   | 0.501 | 0.719  | 1.44 |

|        |                                                                                                            |        |                         |                                                                   |                                         |                                                           |       |       |      |
|--------|------------------------------------------------------------------------------------------------------------|--------|-------------------------|-------------------------------------------------------------------|-----------------------------------------|-----------------------------------------------------------|-------|-------|------|
| P41735 | 5-demethoxyubiquinone hydroxylase, mitochondrial [OS=Saccharomyces cerevisiae S288c]                       | 854292 | CAT5; YOR125C           | metabolic process                                                 | membrane;mitochondrion                  | catalytic activity;metal ion binding                      | 0.54  | 0.778 | 1.44 |
| Q08023 | Protein FMP25, mitochondrial [OS=Saccharomyces cerevisiae S288c]                                           | 850766 | FMP25; YLR077W          | cell organization and biogenesis                                  | membrane;mitochondrion                  |                                                           | 0.968 | 1.412 | 1.46 |
| P38127 | mitochondrial carrier protein RIM2 [OS=Saccharomyces cerevisiae S288c]                                     | 852491 | RIM2; YBR192W           | cell organization and biogenesis;metabolic process;transport      | membrane;mitochondrion                  | structural molecule activity;transporter activity         | 1.239 | 1.818 | 1.47 |
| P25573 | Mitochondrial inner membrane i-AAA protease supercomplex subunit MGR1 [OS=Saccharomyces cerevisiae S288c]  | 850313 | MGR1; YCL044C           | metabolic process                                                 | membrane;mitochondrion                  | protein binding                                           | 0.701 | 1.031 | 1.47 |
| P35180 | mitochondrial import receptor subunit Tom20 [OS=Saccharomyces cerevisiae S288c]                            | 852973 | TOM20; YGR082 W         | cell organization and biogenesis;transport                        | membrane;mitochondrion                  | protein binding;transporter activity                      | 0.701 | 1.031 | 1.47 |
| P08466 | mitochondrial nuclease [OS=Saccharomyces cerevisiae S288c]                                                 | 853222 | NUC1; YJL208C           | cell death;metabolic process                                      | membrane;mitochondrion;nucleus          | catalytic activity;metal ion binding                      | 1.336 | 1.976 | 1.48 |
| P40530 | [Pyruvate dehydrogenase (acetyl-transferring)] kinase 1, mitochondrial [OS=Saccharomyces cerevisiae S288c] | 854769 | PKP1; YIL042C           | metabolic process                                                 | mitochondrion;organelle lumen           | catalytic activity;nucleotide binding;protein binding     | 0.931 | 1.404 | 1.51 |
| P48237 | Mitochondrial group I intron splicing factor CCM1 [OS=Saccharomyces cerevisiae S288c]                      | 853053 | CCM1; YGR150C           | cell organization and biogenesis;metabolic process                | mitochondrion                           | RNA binding                                               | 0.089 | 0.136 | 1.53 |
| Q03153 | ATPase synthesis protein 25, mitochondrial [OS=Saccharomyces cerevisiae S288c]                             | 855123 | ATP25; YMR098C          | cell organization and biogenesis;regulation of biological process | membrane;mitochondrion                  |                                                           | 0.116 | 0.179 | 1.54 |
| P36525 | 54S ribosomal protein L24, mitochondrial [OS=Saccharomyces cerevisiae S288c]                               | 855231 | MRPL24; YMR193 W        | cell organization and biogenesis;metabolic process                | mitochondrion;ribosome                  | RNA binding;structural molecule activity                  | 1.929 | 2.981 | 1.55 |
| P32048 | Lysine-tRNA ligase, mitochondrial [OS=Saccharomyces cerevisiae S288c]                                      | 855651 | MSK1; YNL073W           | cell organization and biogenesis;metabolic process;transport      | cytoplasm;mitochondrion;organelle lumen | catalytic activity;nucleotide binding;RNA binding         | 0.122 | 0.189 | 1.55 |
| P33893 | Glutamyl-tRNA(Gln) amidotransferase subunit B, mitochondrial [OS=Saccharomyces cerevisiae S288c]           | 852198 | PET112; YBL080C         | cell organization and biogenesis;metabolic process                | mitochondrion                           | catalytic activity;nucleotide binding                     | 0.15  | 0.233 | 1.55 |
| P36101 | tRNA threonylcarbamoyladenine dehydratase 2 [OS=Saccharomyces cerevisiae S288c]                            | 853841 | TCO2; YKL027W ; YKL027W | metabolic process                                                 | cytosol;membrane;mitochondrion          | catalytic activity;nucleotide binding                     | 0.616 | 0.957 | 1.55 |
| P47150 | 37S ribosomal protein S7, mitochondrial [OS=Saccharomyces cerevisiae S288c]                                | 853578 | RSM7; YJR113C           | cell organization and biogenesis;metabolic process                | mitochondrion;ribosome                  | RNA binding;structural molecule activity                  | 0.616 | 0.957 | 1.55 |
| P38771 | Ribosome-recycling factor, mitochondrial [OS=Saccharomyces cerevisiae S288c]                               | 856433 | RRF1; YHR038 W          | cell organization and biogenesis;metabolic process                | mitochondrion                           | RNA binding                                               | 1.254 | 1.955 | 1.56 |
| Q06510 | Lysophosphatidylcholine acyltransferase [OS=Saccharomyces cerevisiae S288c]                                | 856262 | TAZ1; YPR140W           | cell organization and biogenesis;metabolic process;transport      | membrane;mitochondrion                  | catalytic activity                                        | 0.194 | 0.304 | 1.57 |
| P00427 | Cytochrome c oxidase subunit 6, mitochondrial [OS=Saccharomyces cerevisiae S288c]                          | 856448 | COX6; YHR051 W          | metabolic process;transport                                       | membrane;mitochondrion                  | catalytic activity;metal ion binding;transporter activity | 4.623 | 7.254 | 1.57 |
| Q12467 | MIOREX complex component 4 [OS=Saccharomyces cerevisiae S288c]                                             | 855935 | YPL168W ; MRX4; YPL168W |                                                                   | membrane;mitochondrion                  |                                                           | 0.202 | 0.318 | 1.57 |
| P40012 | protoporphyrinogen oxidase [OS=Saccharomyces cerevisiae S288c]                                             | 856733 | HEM14; YER014W          | metabolic process                                                 | membrane;mitochondrion                  | catalytic activity                                        | 1.482 | 2.36  | 1.59 |
| P32266 | Dynammin-like GTPase MGM1, mitochondrial [OS=Saccharomyces cerevisiae S288c]                               | 854386 | MGM1; YOR211C           | cell organization and biogenesis                                  | membrane;mitochondrion                  | catalytic activity;nucleotide binding;protein binding     | 0.28  | 0.448 | 1.60 |
| P31334 | 54S ribosomal protein L9, mitochondrial [OS=Saccharomyces cerevisiae S288c]                                | 853135 | MRPL9; YGR220C          | cell organization and biogenesis;metabolic process                | mitochondrion;ribosome                  | structural molecule activity                              | 0.311 | 0.501 | 1.61 |
| P40098 | uncharacterized mitochondrial membrane protein FMP10 [OS=Saccharomyces cerevisiae S288c]                   | 856931 | FMP10; YER182W          |                                                                   | membrane;mitochondrion                  |                                                           | 2.36  | 3.833 | 1.62 |
| P22353 | 54S ribosomal protein L8, mitochondrial                                                                    | 853382 | MRPL8; YJL063C          | cell organization and biogenesis;metabolic                        | mitochondrion;ribosome                  | structural molecule activity                              | 0.359 | 0.585 | 1.63 |

|        |                                                                                                                                                      |        |                  |                                                                                                                    |                                                        |                                                         |        |        |      |
|--------|------------------------------------------------------------------------------------------------------------------------------------------------------|--------|------------------|--------------------------------------------------------------------------------------------------------------------|--------------------------------------------------------|---------------------------------------------------------|--------|--------|------|
|        | [OS=Saccharomyces cerevisiae S288c]                                                                                                                  |        |                  | process                                                                                                            |                                                        |                                                         |        |        |      |
| P34222 | Peptidyl-tRNA hydrolase 2 [OS=Saccharomyces cerevisiae S288c]                                                                                        | 852223 | PTH2; YBL057C    | regulation of biological process                                                                                   | cytoplasm;cytosol;membrane;mitochondrion               | catalytic activity;protein binding                      | 0.425  | 0.701  | 1.65 |
| P38175 | 37S ribosomal protein MRP21, mitochondrial [OS=Saccharomyces cerevisiae S288c]                                                                       | 852188 | MRP21; YBL090W   | cell organization and biogenesis;metabolic process                                                                 | mitochondrion;ribosome                                 | structural molecule activity                            | 0.425  | 0.701  | 1.65 |
| P22135 | Protein ATP12, mitochondrial [OS=Saccharomyces cerevisiae S288c]                                                                                     | 853259 | ATP12; YJL180C   | cell organization and biogenesis                                                                                   | mitochondrion                                          | protein binding                                         | 0.468  | 0.778  | 1.66 |
| P40515 | Mitochondria fission 1 protein [OS=Saccharomyces cerevisiae S288c]                                                                                   | 854745 | FIS1; YJL065C    | cell death;cell organization and biogenesis;regulation of biological process                                       | membrane;mitochondrion                                 | protein binding                                         | 0.468  | 0.778  | 1.66 |
| Q03430 | 37S ribosomal protein RSM28, mitochondrial [OS=Saccharomyces cerevisiae S288c]                                                                       | 852105 | RSM28; YDR494 W  | cell organization and biogenesis;metabolic process                                                                 | mitochondrion;ribosome                                 | structural molecule activity                            | 2.675  | 4.484  | 1.68 |
| P42949 | Mitochondrial import inner membrane translocase subunit TIM16 [OS=Saccharomyces cerevisiae S288c]                                                    | 853340 | PAM16; YJL104W   | transport                                                                                                          | membrane;mitochondrion                                 | protein binding                                         | 0.52   | 0.874  | 1.68 |
| P36520 | 54S ribosomal protein L10, mitochondrial [OS=Saccharomyces cerevisiae S288c]                                                                         | 855436 | MRPL10; YNL284C  | cell organization and biogenesis;metabolic process                                                                 | mitochondrion;ribosome                                 | structural molecule activity                            | 0.551  | 0.931  | 1.69 |
| P28321 | monoglyceride lipase [OS=Saccharomyces cerevisiae S288c]                                                                                             | 853768 | YJU3; YKL094W    | metabolic process;regulation of biological process                                                                 | cytoplasm;endoplasmic reticulum;membrane;mitochondrion | catalytic activity                                      | 0.551  | 0.931  | 1.69 |
| P53598 | Succinyl-CoA ligase [ADP-forming] subunit alpha, mitochondrial [OS=Saccharomyces cerevisiae S288c]                                                   | 854310 | LSC1; YOR142 W   | metabolic process                                                                                                  | cytosol;mitochondrion                                  | catalytic activity;nucleotide binding                   | 9      | 15.238 | 1.69 |
| P22354 | 54S ribosomal protein L20, mitochondrial [OS=Saccharomyces cerevisiae S288c]                                                                         | 853960 | MRPL20; YKR085C  | cell organization and biogenesis;metabolic process                                                                 | mitochondrion;ribosome                                 | structural molecule activity                            | 1.276  | 2.162  | 1.69 |
| P40471 | NADPH-dependent 1-acyldihydroxyacetone phosphate reductase [OS=Saccharomyces cerevisiae S288c]                                                       | 854682 | AYR1; YJL124W    | metabolic process                                                                                                  | cytoplasm;endoplasmic reticulum;membrane;mitochondrion | catalytic activity                                      | 0.585  | 0.995  | 1.70 |
| P42844 | Mitochondrial protein import protein ZIM17 [OS=Saccharomyces cerevisiae S288c]                                                                       | 855406 | ZIM17; YNL310C   | cell organization and biogenesis;metabolic process;regulation of biological process;response to stimulus;transport | membrane;mitochondrion;organelle lumen                 | metal ion binding;protein binding                       | 0.585  | 0.995  | 1.70 |
| P00128 | Cytochrome b-c1 complex subunit 7 [OS=Saccharomyces cerevisiae S288c]                                                                                | 852142 | QCR7; YDR529C    | cell organization and biogenesis;metabolic process;transport                                                       | membrane;mitochondrion                                 | catalytic activity;transporter activity                 | 15.681 | 26.826 | 1.71 |
| P40165 | NAD(P)H-hydrate epimerase [OS=Saccharomyces cerevisiae S288c]                                                                                        | 855521 | YNL200C; YNL200C | metabolic process                                                                                                  | cytoplasm;mitochondrion                                | catalytic activity;metal ion binding;nucleotide binding | 1.61   | 2.831  | 1.76 |
| Q99297 | Mitochondrial 2-oxodicarboxylate carrier 2 [OS=Saccharomyces cerevisiae S288c]                                                                       | 854397 | ODC2; YOR222 W   | metabolic process;transport                                                                                        | membrane;mitochondrion                                 | structural molecule activity;transporter activity       | 0.778  | 1.371  | 1.76 |
| P19262 | Dihydrolipoyllysine-residue succinyltransferase component of 2-oxoglutarate dehydrogenase complex, mitochondrial [OS=Saccharomyces cerevisiae S288c] | 851726 | KGD2; YDR148C    | cell organization and biogenesis;metabolic process                                                                 | mitochondrion                                          | catalytic activity;protein binding                      | 5.7    | 10.053 | 1.76 |
| P54003 | Protein SUR7 [OS=Saccharomyces cerevisiae S288c]                                                                                                     | 854953 | SUR7; YML052 W   | cell differentiation;transport                                                                                     | membrane;mitochondrion                                 |                                                         | 0.848  | 1.512  | 1.78 |
| P15424 | ATP-dependent RNA helicase MSS116, mitochondrial [OS=Saccharomyces cerevisiae S288c]                                                                 | 851775 | MSS116; YDR194C  | metabolic process;regulation of biological process                                                                 | mitochondrion;organelle lumen                          | catalytic activity;nucleotide binding;RNA binding       | 1.154  | 2.082  | 1.80 |
| P10849 | mitochondrial transcription factor 2 [OS=Saccharomyces cerevisiae S288c]                                                                             | 851517 | MTF2; YDL044C    | metabolic process                                                                                                  | mitochondrion;organelle lumen                          | protein binding;RNA binding                             | 0.259  | 0.468  | 1.81 |
| Q12289 | mitochondrial carnitine carrier [OS=Saccharomyces cerevisiae S288c]                                                                                  | 854267 | CR1; YOR100C     | metabolic process;transport                                                                                        | membrane;mitochondrion                                 | structural molecule activity;transporter activity       | 0.931  | 1.683  | 1.81 |
| P51998 | 54S ribosomal protein yml6, mitochondrial [OS=Saccharomyces cerevisiae S288c]                                                                        | 854983 | YML6; YML025C    | cell organization and biogenesis;metabolic process                                                                 | mitochondrion;ribosome                                 | RNA binding;structural molecule activity                | 0.931  | 1.683  | 1.81 |
| P53230 | Phosphatidate cytidyltransferase, mitochondrial                                                                                                      | 852937 | TAM41; YGR046 W  | metabolic process                                                                                                  | membrane;mitochondrion;organelle lumen                 | catalytic activity                                      | 0.292  | 0.532  | 1.82 |

|        |                                                                                                           |        |                         |                                                                                                                    |                                                      |                                                                   |       |       |      |
|--------|-----------------------------------------------------------------------------------------------------------|--------|-------------------------|--------------------------------------------------------------------------------------------------------------------|------------------------------------------------------|-------------------------------------------------------------------|-------|-------|------|
|        | [OS=Saccharomyces cerevisiae S288c]                                                                       |        |                         |                                                                                                                    |                                                      |                                                                   |       |       |      |
| P43122 | tRNA N6-adenosine threonylcarbamoyltransferase, mitochondrial [OS=Saccharomyces cerevisiae S288c]         | 851454 | QRI7; YDL104C           | cell organization and biogenesis;metabolic process                                                                 | mitochondrion                                        | catalytic activity;metal ion binding                              | 0.334 | 0.616 | 1.84 |
| P38626 | NAADH-cytochrome b5 reductase 1 [OS=Saccharomyces cerevisiae S288c]                                       | 854768 | CBR1; YIL043C           | metabolic process                                                                                                  | endoplasmic reticulum;membrane;mitochondrion;nucleus | catalytic activity                                                | 0.334 | 0.616 | 1.84 |
| Q05648 | MIOREX complex component 10 [OS=Saccharomyces cerevisiae S288c]                                           | 851876 | YDR282C; MRX10; YDR282C |                                                                                                                    | membrane;mitochondrion                               |                                                                   | 0.35  | 0.65  | 1.86 |
| Q02771 | Protein PET117, mitochondrial [OS=Saccharomyces cerevisiae S288c]                                         | 856786 | PET117; YER058W         | cell organization and biogenesis                                                                                   | mitochondrion                                        |                                                                   | 1.154 | 2.162 | 1.87 |
| P36775 | Lon protease homolog, mitochondrial [OS=Saccharomyces cerevisiae S288c]                                   | 852259 | PIM1; YBL022C           | cell organization and biogenesis;metabolic process;regulation of biological process;response to stimulus           | cytoplasm;mitochondrion;organelle lumen              | catalytic activity;DNA binding;nucleotide binding;RNA binding     | 1.222 | 2.311 | 1.89 |
| P38120 | 37S ribosomal protein S9, mitochondrial [OS=Saccharomyces cerevisiae S288c]                               | 852443 | MRP59; YBR146W          | cell organization and biogenesis;metabolic process                                                                 | mitochondrion;ribosome                               | RNA binding;structural molecule activity                          | 1.254 | 2.384 | 1.90 |
| P40496 | 37S ribosomal protein S25, mitochondrial [OS=Saccharomyces cerevisiae S288c]                              | 854715 | RSM25; YIL093C          | cell organization and biogenesis;metabolic process                                                                 | mitochondrion;ribosome                               | structural molecule activity                                      | 0.468 | 0.896 | 1.91 |
| Q06668 | Methyltransferase OMS1, mitochondrial [OS=Saccharomyces cerevisiae S288c]                                 | 851911 | OMS1; YDR316 W          | metabolic process                                                                                                  | membrane;mitochondrion                               | catalytic activity                                                | 0.484 | 0.931 | 1.92 |
| P21771 | 37S ribosomal protein S28, mitochondrial [OS=Saccharomyces cerevisiae S288c]                              | 851937 | MRP528; YDR337 W        | cell organization and biogenesis;metabolic process                                                                 | mitochondrion;ribosome                               | RNA binding;structural molecule activity                          | 0.833 | 1.637 | 1.97 |
| P25038 | Translation initiation factor IF-2, mitochondrial [OS=Saccharomyces cerevisiae S288c]                     | 854135 | IFM1; YOL023W           | cell organization and biogenesis;metabolic process                                                                 | mitochondrion;nucleus                                | catalytic activity;nucleotide binding;RNA binding                 | 0.054 | 0.11  | 2.04 |
| P53848 | Folic acid synthesis protein fol1 [OS=Saccharomyces cerevisiae S288c]                                     | 855465 | FOL1; YNL256W           | metabolic process                                                                                                  | cytoplasm;membrane;mitochondrion                     | catalytic activity;metal ion binding;nucleotide binding           | 0.045 | 0.093 | 2.07 |
| Q08622 | Genetic interactor of prohibitins 3, mitochondrial [OS=Saccharomyces cerevisiae S288c]                    | 854380 | GEP3; YOR205C           | metabolic process;transport                                                                                        | cytosol;membrane;mitochondrion                       | catalytic activity;nucleotide binding;transporter activity        | 0.059 | 0.122 | 2.07 |
| P34231 | Uncharacterized protein YKL187C [OS=Saccharomyces cerevisiae S288c]                                       | 853648 | FAT3; YKL187C; YKL187C  | cell organization and biogenesis;transport                                                                         | membrane;mitochondrion                               |                                                                   | 0.093 | 0.194 | 2.09 |
| P38746 | Obg-like ATPase homolog [OS=Saccharomyces cerevisiae S288c]                                               | 856372 | YLF2; YHL014C           |                                                                                                                    | mitochondrion                                        | nucleotide binding                                                | 0.093 | 0.194 | 2.09 |
| P38756 | tRNA threonylcarbamoyladenine dehydratase 1 [OS=Saccharomyces cerevisiae S288c]                           | 856392 | TCD1; YHR003C; YHR003C  | metabolic process                                                                                                  | cytosol;membrane;mitochondrion                       | catalytic activity;nucleotide binding                             | 0.093 | 0.194 | 2.09 |
| P40452 | Cytochrome c oxidase assembly factor 1 [OS=Saccharomyces cerevisiae S288c]                                | 854649 | COA1; YIL157C           | cell organization and biogenesis                                                                                   | membrane;mitochondrion                               | protein binding                                                   | 0.874 | 1.848 | 2.11 |
| Q08742 | Thiosulfate sulfurtransferase RDL2, mitochondrial [OS=Saccharomyces cerevisiae S288c]                     | 854460 | RDL2; YOR286 W          |                                                                                                                    | mitochondrion                                        | catalytic activity                                                | 0.874 | 1.848 | 2.11 |
| Q12393 | Genetic interactor of prohibitin 5, mitochondrial [OS=Saccharomyces cerevisiae S288c]                     | 850780 | GEP5; YLR091W           | cell organization and biogenesis                                                                                   | mitochondrion                                        |                                                                   | 0.122 | 0.259 | 2.12 |
| P28737 | Protein MSP1 [OS=Saccharomyces cerevisiae S288c]                                                          | 852915 | MSP1; YGR028 W          | cell organization and biogenesis;metabolic process;regulation of biological process;response to stimulus;transport | membrane;mitochondrion;nucleus                       | catalytic activity;nucleotide binding;protein binding;RNA binding | 0.122 | 0.259 | 2.12 |
| Q04472 | Mitochondrial inner membrane i-AAA protease supercomplex subunit MGR3 [OS=Saccharomyces cerevisiae S288c] | 855142 | MGR3; YMR115 W          | metabolic process                                                                                                  | membrane;mitochondrion                               | protein binding                                                   | 0.15  | 0.322 | 2.15 |
| P38816 | thioredoxin reductase 2, mitochondrial [OS=Saccharomyces cerevisiae S288c]                                | 856506 | TRR2; YHR106 W          | cellular homeostasis;metabolic process;regulation of biological process;response to                                | cytoplasm;mitochondrion                              | antioxidant activity;catalytic activity                           | 0.136 | 0.292 | 2.15 |

|          |                                                                                                   |        |                      |                                                                                              |                                                 |                                                                   |       |       |      |
|----------|---------------------------------------------------------------------------------------------------|--------|----------------------|----------------------------------------------------------------------------------------------|-------------------------------------------------|-------------------------------------------------------------------|-------|-------|------|
|          |                                                                                                   |        |                      | stimulus                                                                                     |                                                 |                                                                   |       |       |      |
| P21375   | Fumarate reductase 2 [OS=Saccharomyces cerevisiae S288c]                                          | 853510 | OSM1; YJR051W        | metabolic process                                                                            | endoplasmic reticulum;mitochondrion             | catalytic activity;nucleotide binding                             | 0.16  | 0.346 | 2.16 |
| P40502   | Altered inheritance of mitochondria protein 19, mitochondrial [OS=Saccharomyces cerevisiae S288c] | 854722 | AIM19; YIL087C       |                                                                                              | membrane;mitochondrion                          |                                                                   | 0.995 | 2.162 | 2.17 |
| Q01532-1 | Cysteine proteinase 1, mitochondrial [OS=Saccharomyces cerevisiae S288c]                          |        | MCY1                 | metabolic process;regulation of biological process;response to stimulus                      | cytoplasm;mitochondrion                         | catalytic activity;DNA binding;RNA binding                        | 0.179 | 0.389 | 2.17 |
| P36056   | 37S ribosomal protein S22, mitochondrial [OS=Saccharomyces cerevisiae S288c]                      | 853701 | RSM22; YKL155C       | cell organization and biogenesis;metabolic process                                           | mitochondrion;ribosome                          | catalytic activity;structural molecule activity                   | 0.194 | 0.425 | 2.19 |
| P41921   | glutathione reductase [OS=Saccharomyces cerevisiae S288c]                                         | 856014 | GLR1; YPL091W        | cellular homeostasis;metabolic process;regulation of biological process;response to stimulus | cytoplasm;cytosol;mitochondrion;nucleus         | antioxidant activity;catalytic activity;nucleotide binding        | 0.241 | 0.54  | 2.24 |
| P49334   | Mitochondrial import receptor subunit tom22 [OS=Saccharomyces cerevisiae S288c]                   | 855592 | TOM22; YNL131W       | cell organization and biogenesis;transport                                                   | membrane;mitochondrion                          | protein binding;transporter activity                              | 0.292 | 0.668 | 2.29 |
| P14063   | 54S ribosomal protein L31, mitochondrial [OS=Saccharomyces cerevisiae S288c]                      | 853720 | MRPL31; YKL138C      | cell organization and biogenesis;metabolic process                                           | mitochondrion;ribosome                          | structural molecule activity                                      | 0.292 | 0.668 | 2.29 |
| Q03246   | 37S ribosomal protein S17, mitochondrial [OS=Saccharomyces cerevisiae S288c]                      | 855226 | MRPS17; YMR188C      | cell differentiation;cell organization and biogenesis;metabolic process                      | mitochondrion;ribosome                          | RNA binding;structural molecule activity                          | 0.931 | 2.162 | 2.32 |
| P53193   | J-type co-chaperone JAC1, mitochondrial [OS=Saccharomyces cerevisiae S288c]                       | 852866 | JAC1; YGL018C        | cell organization and biogenesis;metabolic process;transport                                 | membrane;mitochondrion;organelle lumen          | protein binding                                                   | 0.468 | 1.154 | 2.47 |
| P53157   | Mitochondrial pyruvate carrier 1 [OS=Saccharomyces cerevisiae S288c]                              | 852800 | FMP37; MPC1; YGL080W | transport                                                                                    | membrane;mitochondrion                          | transporter activity                                              | 0.468 | 1.154 | 2.47 |
| P25087   | Sterol 24-C-methyltransferase [OS=Saccharomyces cerevisiae S288c]                                 | 855003 | ERG6; YML008C        | metabolic process                                                                            | endoplasmic reticulum;membrane;mitochondrion    | catalytic activity                                                | 0.557 | 1.424 | 2.56 |
| P35999   | Mitochondrial intermediate peptidase [OS=Saccharomyces cerevisiae S288c]                          | 853724 | OCT1; YKL134C        | cellular homeostasis;metabolic process;regulation of biological process                      | mitochondrion;organelle lumen                   | catalytic activity;metal ion binding                              | 0.145 | 0.372 | 2.57 |
| P39112   | Exoribonuclease II, mitochondrial [OS=Saccharomyces cerevisiae S288c]                             | 855331 | DSS1; YMR287C        | metabolic process                                                                            | mitochondrion;organelle lumen                   | catalytic activity;RNA binding                                    | 0.087 | 0.233 | 2.68 |
| P42900   | Sigma-like sequence protein 1, mitochondrial [OS=Saccharomyces cerevisiae S288c]                  | 850830 | SLS1; YLR139C        | cell organization and biogenesis;metabolic process                                           | membrane;mitochondrion                          | protein binding                                                   | 0.125 | 0.343 | 2.74 |
| P38969   | Pentamidine resistance factor, mitochondrial [OS=Saccharomyces cerevisiae S288c]                  | 854440 | PNT1; YOR266 W       | cell organization and biogenesis;response to stimulus                                        | membrane;mitochondrion                          |                                                                   | 0.259 | 0.711 | 2.75 |
| P22438   | Methionine--tRNA ligase, mitochondrial [OS=Saccharomyces cerevisiae S288c]                        | 853081 | MSM1; YGR171C        | metabolic process                                                                            | cytoplasm;cytosol;mitochondrion;organelle lumen | catalytic activity;nucleotide binding                             | 0.136 | 0.377 | 2.77 |
| Q06089   | Uncharacterized mitochondrial outer membrane protein YPR098C [OS=Saccharomyces cerevisiae S288c]  | 856213 | YPR098C; YPR098C     |                                                                                              | membrane;mitochondrion                          |                                                                   | 0.778 | 2.162 | 2.78 |
| P32493   | ATPase expression protein 1, mitochondrial [OS=Saccharomyces cerevisiae S288c]                    | 855086 | AEP1; YMR064 W       | regulation of biological process                                                             | mitochondrion                                   | translation regulator activity                                    | 0.15  | 0.417 | 2.78 |
| Q12032   | Altered inheritance of mitochondria protein 41, mitochondrial [OS=Saccharomyces cerevisiae S288c] | 854390 | AIM41; YOR215C       |                                                                                              | mitochondrion                                   | catalytic activity                                                | 1.61  | 4.623 | 2.87 |
| Q06698   | Putative ATP-dependent RNA helicase YLR419W [OS=Saccharomyces cerevisiae S288c]                   | 851137 | YLR419W ; YLR419W    | metabolic process                                                                            | cytoplasm;mitochondrion;nucleus                 | catalytic activity;nucleotide binding;protein binding;RNA binding | 0.027 | 0.082 | 3.04 |
| P53234   | Uncharacterized protein YGR053C [OS=Saccharomyces cerevisiae S288c]                               | 852944 | YGR053C; YGR053C     |                                                                                              |                                                 |                                                                   | 0.129 | 0.438 | 3.40 |
| P47039   | Probable kynurenine--oxoglutarate transaminase                                                    | 853386 | BNA3; YJL060W        | metabolic process;regulation of                                                              | cytoplasm;mitochondrion                         | catalytic activity                                                | 0.334 | 1.154 | 3.46 |



|        |                                                                                               |        |                  |                                                                                     |                                                      |                                       |       |       |      |
|--------|-----------------------------------------------------------------------------------------------|--------|------------------|-------------------------------------------------------------------------------------|------------------------------------------------------|---------------------------------------|-------|-------|------|
|        | BNA3 [OS=Saccharomyces cerevisiae S288c]                                                      |        |                  | biological process                                                                  |                                                      |                                       |       |       |      |
| P39533 | Homocitrate dehydratase, mitochondrial [OS=Saccharomyces cerevisiae S288c]                    | 853230 | ACO2; YJL200C    | metabolic process                                                                   | mitochondrion                                        | catalytic activity;metal ion binding  | 0.17  | 0.688 | 4.05 |
| Q02981 | ABC1 family protein YPL109C, mitochondrial [OS=Saccharomyces cerevisiae S288c]                | 855995 | YPL109C; YPL109C |                                                                                     | mitochondrion                                        |                                       | 0.059 | 0.259 | 4.39 |
| P53318 | Ubiquinone biosynthesis monooxygenase COQ6, mitochondrial [OS=Saccharomyces cerevisiae S288c] | 853170 | COQ6; YGR255C    | metabolic process                                                                   | membrane;mitochondrion                               | catalytic activity;nucleotide binding | 0.077 | 0.346 | 4.49 |
| Q08926 | ULP1-interacting protein 4 [OS=Saccharomyces cerevisiae S288c]                                | 855916 | UIP4; YPL186C    |                                                                                     | endoplasmic reticulum;membrane;mitochondrion;nucleus |                                       | 0.136 | 0.668 | 4.91 |
| P38825 | Protein TOM71 [OS=Saccharomyces cerevisiae S288c]                                             | 856517 | TOM71; YHR117 W  | transport                                                                           | membrane;mitochondrion                               | protein binding;transporter activity  | 0.061 | 0.343 | 5.62 |
| P48526 | Isoleucine-tRNA ligase, mitochondrial [OS=Saccharomyces cerevisiae S288c]                     | 856067 | ISM1; YPL040C    | cell organization and biogenesis;metabolic process;regulation of biological process | cytoplasm;cytosol;mitochondrion;organelle lumen      | catalytic activity;nucleotide binding | 0.081 | 0.477 | 5.89 |

**Supplemental Table S2. The relative concentrations of proteins in mitochondria purified from WT cells cultured with or without LCA.** Mitochondria were purified from WT cells recovered on day 4 of cell culturing with or without LCA. Mass spectrometry-based identification and quantitation of proteins recovered in purified mitochondria were performed as described in Materials and methods. The exponentially modified protein abundance index (emPAI) provided by the "Proteome Discoverer" software was used to calculate the relative abundance of mitochondrial proteins between specified datasets. Data on the relative concentrations of mitochondrial proteins are presented as means of 2 independent experiments.

| Accession | Description                                                                                       | Entrez Gene ID | Gene ID          | Biological Process                                                                   | Cellular Component                              | Molecular Function                                           | emPAI WT | emPAI WT + LCA | Ratio WT + LCA / WT |
|-----------|---------------------------------------------------------------------------------------------------|----------------|------------------|--------------------------------------------------------------------------------------|-------------------------------------------------|--------------------------------------------------------------|----------|----------------|---------------------|
| P00127    | Cytochrome b-c1 complex subunit 6                                                                 | 850593         | QCR6             | metabolic process; transport                                                         | membrane; mitochondrion                         | catalytic activity; transporter activity                     | 1.371    | 0.334          | 0.24                |
| Q96VH5    | MICOS complex subunit Mic10                                                                       | 850300         | MOS1             | cell organization and biogenesis                                                     | membrane; mitochondrion                         |                                                              | 6.197    | 1.683          | 0.27                |
| P53230    | Phosphatidate cytidyltransferase, mitochondrial [OS=Saccharomyces cerevisiae S288c]               | 852937         | TAM41; YGR046W   | metabolic process                                                                    | membrane;mitochondrion;organelle lumen          | catalytic activity                                           | 0.668    | 0.186          | 0.28                |
| P14693    | sorting assembly machinery 35 kDa subunit [OS=Saccharomyces cerevisiae S288c]                     | 856483         | SAM35; YHR083W   | cell organization and biogenesis;transport                                           | membrane;mitochondrion                          | protein binding                                              | 0.54     | 0.155          | 0.29                |
| P32332    | Mitochondrial oxaloacetate transport protein [OS=Saccharomyces cerevisiae S288c]                  | 853739         | OAC1; YKL120W    | metabolic process;transport                                                          | membrane;mitochondrion                          | structural molecule activity;transporter activity            | 4.995    | 1.783          | 0.36                |
| P47131    | TMEM14 protein homolog YJR085C [OS=Saccharomyces cerevisiae S288c]                                | 853547         | YJR085C; YJR085C |                                                                                      | membrane;mitochondrion                          |                                                              | 2.162    | 0.778          | 0.36                |
| P53163    | 54S ribosomal protein L12, mitochondrial [OS=Saccharomyces cerevisiae S288c]                      | 852811         | MNP1; YGL068W    | cell organization and biogenesis;metabolic process                                   | mitochondrion;ribosome                          | RNA binding;structural molecule activity                     | 1.31     | 0.52           | 0.40                |
| P47140    | Altered inheritance rate of mitochondria protein 25 [OS=Saccharomyces cerevisiae S288c]           | 853563         | AIM25; YJR100C   | cell organization and biogenesis                                                     | membrane;mitochondrion                          | transporter activity                                         | 0.874    | 0.369          | 0.42                |
| P39515    | mitochondrial import inner membrane translocase subunit Tim17 [OS=Saccharomyces cerevisiae S288c] | 853298         | TIM17; YJL143W   | cell organization and biogenesis;transport                                           | membrane;mitochondrion                          | protein binding;transporter activity                         | 0.778    | 0.334          | 0.43                |
| P09938    | Ribonucleoside-diphosphate reductase small chain 1 [OS=Saccharomyces cerevisiae S288c]            | 853427         | RNR2; YJL026W    | metabolic process                                                                    | cytoplasm;cytosol;nucleus                       | catalytic activity;metal ion binding;protein binding         | 0.668    | 0.292          | 0.44                |
| P40581    | peroxiredoxin HYR1 [OS=Saccharomyces cerevisiae S288c]                                            | 854855         | HYR1; YJR037W    | metabolic process;response to stimulus                                               | cytoplasm;cytosol;mitochondrion;organelle lumen | antioxidant activity;catalytic activity                      | 0.585    | 0.259          | 0.44                |
| P38152    | Tricarboxylate transport protein [OS=Saccharomyces cerevisiae S288c]                              | 852594         | CTP1; YBR291C    | metabolic process;transport                                                          | membrane;mitochondrion                          | structural molecule activity;transporter activity            | 0.551    | 0.245          | 0.44                |
| Q08970    | Mitochondrial metal transporter 2 [OS=Saccharomyces cerevisiae S288c]                             | 855877         | MMT2; YPL224C    | cellular homeostasis;regulation of biological process;response to stimulus;transport | membrane;mitochondrion                          | transporter activity                                         | 0.407    | 0.186          | 0.46                |
| P25270    | rRNA methyltransferase 1, mitochondrial [OS=Saccharomyces cerevisiae S288c]                       | 854376         | MRM1; YOR201C    | metabolic process                                                                    | mitochondrion                                   | catalytic activity;RNA binding                               | 0.274    | 0.129          | 0.47                |
| P29704    | squalene synthase [OS=Saccharomyces cerevisiae S288c]                                             | 856597         | ERG9; YHR190W    | metabolic process                                                                    | endoplasmic reticulum;membrane;mitochondrion    | catalytic activity                                           | 0.222    | 0.105          | 0.47                |
| Q06005    | Octanoyltransferase, mitochondrial [OS=Saccharomyces cerevisiae S288c]                            | 850940         | LIP2; YLR239C    | metabolic process                                                                    | cytoplasm;mitochondrion                         | catalytic activity                                           | 0.245    | 0.116          | 0.47                |
| P38169    | Kynurenine 3-monooxygenase [OS=Saccharomyces cerevisiae S288c]                                    | 852179         | BNA4; YBL098W    | metabolic process                                                                    | membrane;mitochondrion                          | catalytic activity;nucleotide binding                        | 0.172    | 0.083          | 0.48                |
| P81450    | ATP synthase subunit J, mitochondrial [OS=Saccharomyces cerevisiae S288c]                         | 854893         | ATP18; YML081C-A | cell organization and biogenesis;metabolic process;transport                         | membrane;mitochondrion                          | catalytic activity;transporter activity                      | 9        | 4.623          | 0.51                |
| P40165    | NAD(P)H-hydrate epimerase [OS=Saccharomyces cerevisiae S288c]                                     | 855521         | YNL200C; YNL200C | metabolic process                                                                    | cytoplasm;mitochondrion                         | catalytic activity;metal ion binding;nucleotide binding      | 2.162    | 1.154          | 0.53                |
| P01097    | ATPase inhibitor, mitochondrial [OS=Saccharomyces cerevisiae S288c]                               | 851347         | INH1; YDL181W    | metabolic process;regulation of biological process                                   | mitochondrion                                   | catalytic activity;enzyme regulator activity;protein binding | 2.162    | 1.154          | 0.53                |

|        |                                                                                                   |         |                        |                                                                                                                    |                                  |                                                                   |        |        |      |
|--------|---------------------------------------------------------------------------------------------------|---------|------------------------|--------------------------------------------------------------------------------------------------------------------|----------------------------------|-------------------------------------------------------------------|--------|--------|------|
| P39525 | 3-oxoacyl-[acyl-carrier-protein] synthase homolog [OS=Saccharomyces cerevisiae S288c]             | 856790  | CEM1; YER061C          | metabolic process                                                                                                  | mitochondrion                    | catalytic activity                                                | 2.899  | 1.565  | 0.54 |
| P54003 | Protein SUR7 [OS=Saccharomyces cerevisiae S288c]                                                  | 854953  | SUR7; YML052W          | cell differentiation;transport                                                                                     | membrane;mitochondrion           |                                                                   | 1.512  | 0.848  | 0.56 |
| Q12359 | Ammonia transport outward protein 3 [OS=Saccharomyces cerevisiae S288c]                           | 851992  | ATO3; YDR384C          | transport                                                                                                          | membrane;mitochondrion           | transporter activity                                              | 0.995  | 0.585  | 0.59 |
| P25642 | 54S ribosomal protein IMG2, mitochondrial [OS=Saccharomyces cerevisiae S288c]                     | 850434  | IMG2; YCR071C          | cell organization and biogenesis;metabolic process                                                                 | mitochondrion;ribosome           | structural molecule activity                                      | 0.778  | 0.468  | 0.60 |
| Q02888 | Inner membrane assembly complex subunit 17 [OS=Saccharomyces cerevisiae S288c]                    | 856005  | AIM43; INA17; YPL099C  | cell organization and biogenesis                                                                                   | membrane;mitochondrion           | protein binding                                                   | 0.701  | 0.425  | 0.61 |
| P32799 | Cytochrome c oxidase subunit 6A, mitochondrial [OS=Saccharomyces cerevisiae S288c]                | 852684  | COX13; YGL191W         | cell organization and biogenesis;metabolic process;regulation of biological process;transport                      | membrane;mitochondrion           | catalytic activity;enzyme regulator activity;transporter activity | 18.953 | 11.589 | 0.61 |
| P53212 | Probable transcriptional regulatory protein HAH1 [OS=Saccharomyces cerevisiae S288c]              | 852904  | YGR021W; YGR021W       |                                                                                                                    | mitochondrion                    |                                                                   | 0.585  | 0.359  | 0.61 |
| Q06567 | ABC1 family protein MCP2 [OS=Saccharomyces cerevisiae S288c]                                      | 850955  | YLR253W; MCP2; YLR253W | cell organization and biogenesis                                                                                   | membrane;mitochondrion           |                                                                   | 0.484  | 0.301  | 0.62 |
| P53234 | Uncharacterized protein YGR053C [OS=Saccharomyces cerevisiae S288c]                               | 852944  | YGR053C; YGR053C       |                                                                                                                    |                                  |                                                                   | 0.438  | 0.274  | 0.63 |
| Q03028 | Mitochondrial 2-oxodicarboxylate carrier 1 [OS=Saccharomyces cerevisiae S288c]                    | 855969  | ODC1; YPL134C          | metabolic process;transport                                                                                        | membrane;mitochondrion           | structural molecule activity;transporter activity                 | 5.813  | 3.642  | 0.63 |
| Q3E824 | Uncharacterized protein YOR020W-A [OS=Saccharomyces cerevisiae S288c]                             | 1466480 | YOR020W-A; YOR020W-A   | metabolic process;transport                                                                                        | membrane;mitochondrion           |                                                                   | 5.813  | 3.642  | 0.63 |
| P00560 | Phosphoglycerate kinase [OS=Saccharomyces cerevisiae S288c]                                       | 850370  | PGK1; YCR012W          | metabolic process                                                                                                  | cytoplasm;membrane;mitochondrion | catalytic activity;nucleotide binding                             | 6.356  | 4.012  | 0.63 |
| P33310 | ATP-dependent permease MDL1, mitochondrial [OS=Saccharomyces cerevisiae S288c]                    | 850885  | MDL1; YLR188W          | transport                                                                                                          | membrane;mitochondrion           | catalytic activity;nucleotide binding;transporter activity        | 0.833  | 0.528  | 0.63 |
| P15992 | heat shock protein 26 [OS=Saccharomyces cerevisiae S288c]                                         | 852364  | HSP26; YBR072W         | metabolic process;response to stimulus                                                                             | cytoplasm;mitochondrion;nucleus  | protein binding;RNA binding                                       | 4.878  | 3.125  | 0.64 |
| P07253 | cytochrome B pre-mRNA-processing protein 6 [OS=Saccharomyces cerevisiae S288c]                    | 852417  | CBP6; YBR120C          | cell organization and biogenesis;metabolic process;regulation of biological process                                | mitochondrion;ribosome           |                                                                   | 4.179  | 2.728  | 0.65 |
| P39006 | Phosphatidylserine decarboxylase proenzyme 1, mitochondrial [OS=Saccharomyces cerevisiae S288c]   | 855552  | PSD1; YNL169C          | metabolic process;regulation of biological process                                                                 | membrane;mitochondrion           | catalytic activity                                                | 0.743  | 0.487  | 0.66 |
| P00045 | Cytochrome c iso-2 [OS=Saccharomyces cerevisiae S288c]                                            | 856672  | CYC7; YEL039C          | metabolic process;transport                                                                                        | mitochondrion                    | metal ion binding                                                 | 1.512  | 0.995  | 0.66 |
| Q06143 | mitochondrial dicarboxylate transporter [OS=Saccharomyces cerevisiae S288c]                       | 851063  | DIC1; YLR348C          | metabolic process;transport                                                                                        | membrane;mitochondrion           | structural molecule activity;transporter activity                 | 1.404  | 0.931  | 0.66 |
| P14832 | peptidyl-prolyl cis-trans isomerase [OS=Saccharomyces cerevisiae S288c]                           | 851733  | CPR1; YDR155C          | cell differentiation;cell organization and biogenesis;metabolic process;regulation of biological process;transport | cytoplasm;mitochondrion;nucleus  | catalytic activity;RNA binding                                    | 1.31   | 0.874  | 0.67 |
| P42949 | Mitochondrial import inner membrane translocase subunit TIM16 [OS=Saccharomyces cerevisiae S288c] | 853340  | PAM16; YJL104W         | transport                                                                                                          | membrane;mitochondrion           | protein binding                                                   | 1.31   | 0.874  | 0.67 |
| Q12298 | uncharacterized ABC transporter ATP-binding protein YDR061W [OS=Saccharomyces cerevisiae S288c]   | 851633  | YDR061W; YDR061W       |                                                                                                                    | mitochondrion                    | catalytic activity;nucleotide binding                             | 0.512  | 0.343  | 0.67 |
| Q03799 | 37S ribosomal protein S8, mitochondrial [OS=Saccharomyces cerevisiae S288c]                       | 855190  | MRPS8; YMR158W         | cell organization and biogenesis;metabolic process                                                                 | mitochondrion;ribosome           | structural molecule activity                                      | 1.031  | 0.701  | 0.68 |
| Q12428 | Probable 2-methylcitrate dehydratase [OS=Saccharomyces cerevisiae S288c]                          | 856108  | PDH1; YPR002W          | metabolic process                                                                                                  | cytoplasm;membrane;mitochondrion | catalytic activity                                                | 18.11  | 12.335 | 0.68 |
| P40086 | Cytochrome c oxidase assembly protein cox15 [OS=Saccharomyces cerevisiae S288c]                   | 856884  | COX15; YER141W         | cell organization and biogenesis;metabolic process;transport                                                       | membrane;mitochondrion           | catalytic activity;transporter activity                           | 2.594  | 1.783  | 0.69 |

|        |                                                                                                                |            |                                |                                                                                                                               |                                                   |                                                                              |            |            |      |
|--------|----------------------------------------------------------------------------------------------------------------|------------|--------------------------------|-------------------------------------------------------------------------------------------------------------------------------|---------------------------------------------------|------------------------------------------------------------------------------|------------|------------|------|
| P00445 | Superoxide dismutase [Cu-Zn] [OS=Saccharomyces cerevisiae S288c]                                               | 85356<br>8 | SOD1;<br>YJR104<br>C           | cell organization and biogenesis;cellular homeostasis;metabolic process;regulation of biological process;response to stimulus | cytoplasm;cytosol;mitochondrion;nucleus           | antioxidant activity;catalytic activity;metal ion binding;protein binding    | 1.848      | 1.31       | 0.71 |
| P17695 | Glutaredoxin-2, mitochondrial [OS=Saccharomyces cerevisiae S288c]                                              | 85212<br>4 | GRX2;<br>YDR513<br>W           | cellular homeostasis;metabolic process;regulation of biological process;response to stimulus;transport                        | cytoplasm;cytosol;mitochondrion;nucleus           | antioxidant activity;catalytic activity                                      | 1.848      | 1.31       | 0.71 |
| Q04689 | Altered inheritance of mitochondria protein 32 [OS=Saccharomyces cerevisiae S288c]                             | 85495<br>5 | AIM32;<br>YML050<br>W          |                                                                                                                               |                                                   |                                                                              | 0.52       | 0.369      | 0.71 |
| P00360 | glyceraldehyde-3-phosphate dehydrogenase 1 [OS=Saccharomyces cerevisiae S288c]                                 | 85339<br>5 | TDH1;<br>YJL052<br>W           | metabolic process                                                                                                             | cytoplasm;cytosol;membrane;mitochondrion          | catalytic activity;nucleotide binding                                        | 1.721      | 1.228      | 0.71 |
| P53311 | Mitochondrial pyruvate carrier 3 [OS=Saccharomyces cerevisiae S288c]                                           | 85315<br>8 | FMP43;<br>MPC3;<br>YGR243<br>W | transport                                                                                                                     | membrane;mitochondrion                            | transporter activity                                                         | 1.61       | 1.154      | 0.72 |
| P53326 | Uncharacterized protein YGR266W [OS=Saccharomyces cerevisiae S288c]                                            | 85318<br>2 | YGR266<br>W;<br>YGR266<br>W    |                                                                                                                               | membrane;mitochondrion                            |                                                                              | 1.081      | 0.778      | 0.72 |
| P19657 | plasma membrane ATPase 2 [OS=Saccharomyces cerevisiae S288c]                                                   | 85607<br>1 | PMA2;<br>YPL036<br>W           | cellular homeostasis;metabolic process;transport                                                                              | membrane;mitochondrion                            | catalytic activity;metal ion binding;nucleotide binding;transporter activity | 10.93<br>8 | 7.886      | 0.72 |
| P48360 | Probable NADPH:adrenodoxin oxidoreductase, mitochondrial [OS=Saccharomyces cerevisiae S288c]                   | 85198<br>2 | ARH1;<br>YDR376<br>W           | cellular homeostasis;metabolic process;transport                                                                              | cytoplasm;membrane;mitochondrion;organ elle lumen | catalytic activity                                                           | 0.346      | 0.25       | 0.72 |
| P25087 | Sterol 24-C-methyltransferase [OS=Saccharomyces cerevisiae S288c]                                              | 85500<br>3 | ERG6;<br>YML008<br>C           | metabolic process                                                                                                             | endoplasmic reticulum;membrane;mitochondrion      | catalytic activity                                                           | 1.424      | 1.031      | 0.72 |
| P39722 | Mitochondrial Rho GTPase 1 [OS=Saccharomyces cerevisiae S288c]                                                 | 85124<br>9 | GEM1;<br>YAL048<br>C           | cell organization and biogenesis;regulation of biological process;response to stimulus;transport                              | membrane;mitochondrion                            | catalytic activity;metal ion binding;nucleotide binding                      | 0.259      | 0.189      | 0.73 |
| P38885 | Altered inheritance of mitochondria protein 46, mitochondrial [OS=Saccharomyces cerevisiae S288c]              | 85660<br>6 | AIM46;<br>YHR199<br>C          |                                                                                                                               | mitochondrion                                     | catalytic activity                                                           | 2.728      | 1.994      | 0.73 |
| P39518 | Long-chain-fatty-acid--CoA ligase 2 [OS=Saccharomyces cerevisiae S288c]                                        | 85673<br>4 | FAA2;<br>YER015<br>W           | metabolic process;transport                                                                                                   | cytoplasm;mitochondrion                           | catalytic activity;nucleotide binding                                        | 0.619      | 0.455      | 0.74 |
| Q99297 | Mitochondrial 2-oxodicarboxylate carrier 2 [OS=Saccharomyces cerevisiae S288c]                                 | 85439<br>7 | ODC2;<br>YOR222<br>W           | metabolic process;transport                                                                                                   | membrane;mitochondrion                            | structural molecule activity;transporter activity                            | 1.054      | 0.778      | 0.74 |
| P28817 | 3-hydroxyisobutyryl-CoA hydrolase, mitochondrial [OS=Saccharomyces cerevisiae S288c]                           | 85160<br>6 | EHD3;<br>YDR036<br>C           | metabolic process                                                                                                             | mitochondrion                                     | catalytic activity                                                           | 1.395      | 1.043      | 0.75 |
| P33759 | 37S ribosomal protein S5, mitochondrial [OS=Saccharomyces cerevisiae S288c]                                    | 85255<br>3 | MRP55;<br>YBR251<br>W          | cell organization and biogenesis;metabolic process                                                                            | mitochondrion;ribosome                            | RNA binding;structural molecule activity                                     | 0.778      | 0.585      | 0.75 |
| P40012 | protoporphyrinogen oxidase [OS=Saccharomyces cerevisiae S288c]                                                 | 85673<br>3 | HEM14;<br>YER014<br>W          | metabolic process                                                                                                             | membrane;mitochondrion                            | catalytic activity                                                           | 2.162      | 1.637      | 0.76 |
| P50087 | MICOS subunit MIC26 [OS=Saccharomyces cerevisiae S288c]                                                        | 85315<br>0 | MOS2;<br>MIC26;<br>YGR235<br>C | cell organization and biogenesis                                                                                              | membrane;mitochondrion                            |                                                                              | 1.683      | 1.276      | 0.76 |
| Q02883 | N-acyl-phosphatidylethanolamine-hydrolyzing phospholipase D, mitochondrial [OS=Saccharomyces cerevisiae S288c] | 85600<br>1 | FMP30;<br>YPL103<br>C          | metabolic process                                                                                                             | membrane;mitochondrion                            | catalytic activity;metal ion binding                                         | 0.557      | 0.425      | 0.76 |
| Q12032 | Altered inheritance of mitochondria protein 41, mitochondrial [OS=Saccharomyces cerevisiae S288c]              | 85439<br>0 | AIM41;<br>YOR215<br>C          |                                                                                                                               | mitochondrion                                     | catalytic activity                                                           | 2.831      | 2.162      | 0.76 |
| P23641 | mitochondrial phosphate carrier protein [OS=Saccharomyces cerevisiae S288c]                                    | 85354<br>0 | MIR1;<br>YJR077<br>C           | metabolic process;transport                                                                                                   | membrane;mitochondrion                            | protein binding;structural molecule activity;transporter activity            | 30.62<br>3 | 23.48<br>4 | 0.77 |
| P40485 | Phosphatidylinositol 4,5-bisphosphate-binding protein SLM1 [OS=Saccharomyces cerevisiae S288c]                 | 85470<br>1 | SLM1;<br>YIL105C               | cell organization and biogenesis;regulation of biological process;response to stimulus;transport                              | cytoplasm;membrane;mitochondrion                  |                                                                              | 1.371      | 1.054      | 0.77 |
| Q07500 | External NADH-ubiquinone oxidoreductase 2, mitochondrial [OS=Saccharomyces cerevisiae S288c]                   | 85147<br>4 | NDE2;<br>YDL085<br>W           | metabolic process                                                                                                             | mitochondrion                                     | catalytic activity;nucleotide binding                                        | 13.67<br>8 | 10.65<br>9 | 0.78 |
| P43617 | Uncharacterized mitochondrial carrier YFR045W [OS=Saccharomyces cerevisiae S288c]                              | 85060<br>6 | YFR045<br>W;<br>YFR045<br>W    | metabolic process;transport                                                                                                   | membrane;mitochondrion                            | structural molecule activity;transporter activity                            | 0.995      | 0.778      | 0.78 |

|        |                                                                                           |        |                        |                                                                                                  |                                                  |                                                                             |         |        |      |
|--------|-------------------------------------------------------------------------------------------|--------|------------------------|--------------------------------------------------------------------------------------------------|--------------------------------------------------|-----------------------------------------------------------------------------|---------|--------|------|
| P46681 | D-lactate dehydrogenase [cytochrome] 2, mitochondrial [OS=Saccharomyces cerevisiae S288c] | 851376 | DLD2; YDL178W          | metabolic process                                                                                | mitochondrion;organelle lumen                    | catalytic activity;nucleotide binding;protein binding                       | 1.829   | 1.438  | 0.79 |
| P00410 | Cytochrome c oxidase subunit 2 [OS=Saccharomyces cerevisiae S288c]                        | 854622 | COX2; Q0250            | metabolic process;transport                                                                      | membrane;mitochondrion                           | catalytic activity;metal ion binding;protein binding;transporter activity   | 4.623   | 3.642  | 0.79 |
| P36101 | tRNA threonylcarbamoyladenine dehydratase 2 [OS=Saccharomyces cerevisiae S288c]           | 853841 | TCO2; YKL027W; YKL027W | metabolic process                                                                                | cytosol;membrane;mitochondrion                   | catalytic activity;nucleotide binding                                       | 0.778   | 0.616  | 0.79 |
| P32387 | 54S ribosomal protein L41, mitochondrial [OS=Saccharomyces cerevisiae S288c]              | 852014 | MRP20; YDR405W         | cell organization and biogenesis;metabolic process                                               | mitochondrion;ribosome                           | nucleotide binding;protein binding;RNA binding;structural molecule activity | 1.581   | 1.254  | 0.79 |
| P27697 | Atypical kinase COQ8, mitochondrial [OS=Saccharomyces cerevisiae S288c]                   | 852758 | COQ8; YGL119W          | metabolic process                                                                                | membrane;mitochondrion;organelle lumen           | catalytic activity;nucleotide binding                                       | 0.453   | 0.365  | 0.81 |
| P18239 | ADP,ATP carrier protein 2 [OS=Saccharomyces cerevisiae S288c]                             | 852250 | PET9; YBL030C          | cell death;metabolic process;transport                                                           | membrane;mitochondrion                           | structural molecule activity;transporter activity                           | 110.034 | 89.063 | 0.81 |
| P40035 | Mitochondrial phosphate carrier protein 2 [OS=Saccharomyces cerevisiae S288c]             | 856779 | PIC2; YER053C          | cellular homeostasis;metabolic process;transport                                                 | membrane;mitochondrion                           | structural molecule activity;transporter activity                           | 1.637   | 1.336  | 0.82 |
| P38127 | mitochondrial carrier protein RIM2 [OS=Saccharomyces cerevisiae S288c]                    | 852491 | RIM2; YBR192W          | cell organization and biogenesis;metabolic process;transport                                     | membrane;mitochondrion                           | structural molecule activity;transporter activity                           | 1.512   | 1.239  | 0.82 |
| P38120 | 37S ribosomal protein S9, mitochondrial [OS=Saccharomyces cerevisiae S288c]               | 852443 | MRPS9; YBR146W         | cell organization and biogenesis;metabolic process                                               | mitochondrion;ribosome                           | RNA binding;structural molecule activity                                    | 2.384   | 1.955  | 0.82 |
| P53969 | Sorting assembly machinery 50 kDa subunit [OS=Saccharomyces cerevisiae S288c]             | 855705 | SAM50; YNL026W         | cell organization and biogenesis;transport                                                       | membrane;mitochondrion                           | protein binding;transporter activity                                        | 0.743   | 0.61   | 0.82 |
| Q12289 | mitochondrial carnitine carrier [OS=Saccharomyces cerevisiae S288c]                       | 854267 | CRC1; YOR100C          | metabolic process;transport                                                                      | membrane;mitochondrion                           | structural molecule activity;transporter activity                           | 1.404   | 1.154  | 0.82 |
| Q12482 | Mitochondrial aspartate-glutamate transporter AGC1 [OS=Saccharomyces cerevisiae S288c]    | 856132 | AGC1; YPR021C          | metabolic process;transport                                                                      | membrane;mitochondrion                           | structural molecule activity;transporter activity                           | 0.348   | 0.292  | 0.84 |
| Q06668 | Methyltransferase OMS1, mitochondrial [OS=Saccharomyces cerevisiae S288c]                 | 851911 | OMS1; YDR316W          | metabolic process                                                                                | membrane;mitochondrion                           | catalytic activity                                                          | 0.693   | 0.585  | 0.84 |
| Q04013 | Citrate/oxoglutarate carrier protein [OS=Saccharomyces cerevisiae S288c]                  | 855282 | YHM2; YMR241W          | cell organization and biogenesis;metabolic process;transport                                     | membrane;mitochondrion                           | DNA binding;structural molecule activity;transporter activity               | 3.467   | 2.981  | 0.86 |
| P00925 | Enolase 2 [OS=Saccharomyces cerevisiae S288c]                                             | 856579 | ENO2; YHR174W          | metabolic process;regulation of biological process                                               | cytoplasm;cytosol;membrane;mitochondrion;vacuole | catalytic activity;metal ion binding;protein binding                        | 1.212   | 1.043  | 0.86 |
| P36066 | Protein MRG3-like [OS=Saccharomyces cerevisiae S288c]                                     | 853725 | YKL133C; YKL133C       | metabolic process                                                                                | membrane;mitochondrion                           | protein binding                                                             | 1.054   | 0.911  | 0.86 |
| P40098 | uncharacterized mitochondrial membrane protein FMP10 [OS=Saccharomyces cerevisiae S288c]  | 856931 | FMP10; YER182W         |                                                                                                  | membrane;mitochondrion                           |                                                                             | 5.952   | 5.158  | 0.87 |
| P32266 | Dynamn-like GTPase MGM1, mitochondrial [OS=Saccharomyces cerevisiae S288c]                | 854386 | MGM1; YOR211C          | cell organization and biogenesis                                                                 | membrane;mitochondrion                           | catalytic activity;nucleotide binding;protein binding                       | 0.448   | 0.389  | 0.87 |
| Q08179 | Mitochondrial distribution and morphology protein 38 [OS=Saccharomyces cerevisiae S288c]  | 854130 | MDM38; YOL027C         | cell organization and biogenesis;cellular homeostasis;regulation of biological process;transport | membrane;mitochondrion                           |                                                                             | 6.079   | 5.31   | 0.87 |
| P27929 | 37S ribosomal protein NAM9, mitochondrial [OS=Saccharomyces cerevisiae S288c]             | 855585 | NAM9; YNL137C          | cell organization and biogenesis;metabolic process;regulation of biological process              | mitochondrion;ribosome                           | RNA binding;structural molecule activity                                    | 1.062   | 0.931  | 0.88 |
| P25374 | Cysteine desulfurase, mitochondrial [OS=Saccharomyces cerevisiae S288c]                   | 850343 | NFS1; YCL017C          | cell organization and biogenesis;cellular homeostasis;metabolic process                          | mitochondrion;nucleus                            | catalytic activity;metal ion binding;protein binding                        | 2.594   | 2.3    | 0.89 |
| P32335 | Protein MSS51, mitochondrial [OS=Saccharomyces cerevisiae S288c]                          | 850900 | MSS51; YLR203C         | metabolic process;regulation of biological process                                               | membrane;mitochondrion                           | protein binding;translational regulator activity                            | 1.929   | 1.712  | 0.89 |
| P00359 | Glyceraldehyde-3-phosphate dehydrogenase 3 [OS=Saccharomyces cerevisiae S288c]            | 853106 | TDH3; YGR192C          | cell death;metabolic process                                                                     | cytoplasm;cytosol;membrane;mitochondrion;nucleus | catalytic activity;nucleotide binding;RNA                                   | 7.185   | 6.406  | 0.89 |

|        |                                                                                                                                               |        |                |                                                                                                             |                                              |                                                                           |         |         |      |
|--------|-----------------------------------------------------------------------------------------------------------------------------------------------|--------|----------------|-------------------------------------------------------------------------------------------------------------|----------------------------------------------|---------------------------------------------------------------------------|---------|---------|------|
|        | S288c]                                                                                                                                        |        |                |                                                                                                             |                                              | binding                                                                   |         |         |      |
| P32191 | Glycerol-3-phosphate dehydrogenase, mitochondrial [OS=Saccharomyces cerevisiae S288c]                                                         | 854651 | GUT2; YIL155C  | metabolic process                                                                                           | membrane;mitochondrion                       | catalytic activity                                                        | 8.522   | 7.633   | 0.90 |
| P33311 | ATP-dependent permease MDL2, mitochondrial [OS=Saccharomyces cerevisiae S288c]                                                                | 855858 | MDL2; YPL270W  | response to stimulus;transport                                                                              | membrane;mitochondrion                       | catalytic activity;nucleotide binding;transporter activity                | 1.116   | 1.006   | 0.90 |
| Q08818 | Meiotic sister-chromatid recombination protein 6, mitochondrial [OS=Saccharomyces cerevisiae S288c]                                           | 854536 | MSC6; YOR354C  | metabolic process                                                                                           | mitochondrion;organelle lumen                | RNA binding                                                               | 1.047   | 0.945   | 0.90 |
| P40047 | Aldehyde dehydrogenase 5, mitochondrial [OS=Saccharomyces cerevisiae S288c]                                                                   | 856804 | ALD5; YER073W  | metabolic process                                                                                           | mitochondrion;organelle lumen                | catalytic activity                                                        | 2.384   | 2.162   | 0.91 |
| P32843 | Mitochondrial escape protein 2 [OS=Saccharomyces cerevisiae S288c]                                                                            | 855348 | YME2; YMR302C  | cell organization and biogenesis;metabolic process                                                          | membrane;mitochondrion                       | nucleotide binding;RNA binding                                            | 5.158   | 4.68    | 0.91 |
| P16547 | Mitochondrial outer membrane protein OM45 [OS=Saccharomyces cerevisiae S288c]                                                                 | 854670 | OM45; YIL136W  |                                                                                                             | membrane;mitochondrion                       |                                                                           | 250.189 | 228.087 | 0.91 |
| P07256 | Cytochrome b-c1 complex subunit 1, mitochondrial [OS=Saccharomyces cerevisiae S288c]                                                          | 852235 | COR1; YBL045C  | metabolic process;transport                                                                                 | membrane;mitochondrion                       | catalytic activity;metal ion binding;protein binding;transporter activity | 18.783  | 17.166  | 0.91 |
| P53312 | Succinyl-CoA ligase [ADP-forming] subunit beta, mitochondrial [OS=Saccharomyces cerevisiae S288c]                                             | 853159 | LSC2; YGR244C  | metabolic process                                                                                           | mitochondrion                                | catalytic activity;nucleotide binding                                     | 20.017  | 18.513  | 0.92 |
| P07251 | ATP synthase subunit alpha, mitochondrial [OS=Saccharomyces cerevisiae S288c]                                                                 | 852177 | ATP1; YBL099W  | metabolic process;transport                                                                                 | cytosol;membrane;mitochondrion               | catalytic activity;nucleotide binding;transporter activity                | 34.938  | 32.711  | 0.94 |
| P04840 | Mitochondrial outer membrane protein porin 1 [OS=Saccharomyces cerevisiae S288c]                                                              | 855669 | POR1; YNL055C  | cell death;cell organization and biogenesis;cellular homeostasis;regulation of biological process;transport | cytoplasm;membrane;mitochondrion             | transporter activity                                                      | 15.238  | 15.238  | 1.00 |
| P53252 | sphingolipid long chain base-responsive protein PIL1 [OS=Saccharomyces cerevisiae S288c]                                                      | 852977 | PIL1; YGR086C  | cell organization and biogenesis;regulation of biological process;response to stimulus;transport            | cytoplasm;membrane;mitochondrion             | protein binding                                                           | 16.191  | 16.191  | 1.00 |
| P40215 | External NADH-ubiquinone oxidoreductase 1, mitochondrial [OS=Saccharomyces cerevisiae S288c]                                                  | 855176 | NDE1; YMR145C  | metabolic process                                                                                           | mitochondrion                                | catalytic activity;nucleotide binding                                     | 5.469   | 5.469   | 1.00 |
| P07213 | Mitochondrial import receptor subunit TOM70 [OS=Saccharomyces cerevisiae S288c]                                                               | 855602 | TOM70; YNL121C | cell organization and biogenesis;transport                                                                  | membrane;mitochondrion                       | protein binding;transporter activity                                      | 3.642   | 3.642   | 1.00 |
| P07246 | Alcohol dehydrogenase 3, mitochondrial [OS=Saccharomyces cerevisiae S288c]                                                                    | 855107 | ADH3; YMR083W  | metabolic process                                                                                           | mitochondrion;organelle lumen                | catalytic activity;metal ion binding                                      | 10.159  | 10.159  | 1.00 |
| P43635 | Citrate synthase 3, mitochondrial [OS=Saccharomyces cerevisiae S288c]                                                                         | 856107 | CIT3; YPR001W  | metabolic process                                                                                           | mitochondrion                                | catalytic activity                                                        | 5.529   | 5.529   | 1.00 |
| P32473 | Pyruvate dehydrogenase E1 component subunit beta, mitochondrial [OS=Saccharomyces cerevisiae S288c]                                           | 852522 | PDB1; YBR221C  | metabolic process                                                                                           | mitochondrion;organelle lumen                | catalytic activity                                                        | 9       | 9       | 1.00 |
| P12695 | Dihydropolypyllysine-residue acetyltransferase component of pyruvate dehydrogenase complex, mitochondrial [OS=Saccharomyces cerevisiae S288c] | 855653 | LAT1; YNL071W  | metabolic process                                                                                           | mitochondrion;organelle lumen                | catalytic activity                                                        | 6.43    | 6.43    | 1.00 |
| P49367 | Homoaconitase, mitochondrial [OS=Saccharomyces cerevisiae S288c]                                                                              | 851820 | LYS4; YDR234W  | metabolic process                                                                                           | mitochondrion                                | catalytic activity;metal ion binding;protein binding                      | 1.54    | 1.54    | 1.00 |
| P36013 | NAD-dependent malic enzyme, mitochondrial [OS=Saccharomyces cerevisiae S288c]                                                                 | 853839 | MAE1; YKL029C  | metabolic process                                                                                           | mitochondrion;organelle lumen                | catalytic activity;metal ion binding;nucleotide binding                   | 1.985   | 1.985   | 1.00 |
| P07143 | Cytochrome c1, heme protein, mitochondrial [OS=Saccharomyces cerevisiae S288c]                                                                | 854231 | CYT1; YOR065W  | metabolic process;transport                                                                                 | cytosol;membrane;mitochondrion               | metal ion binding                                                         | 23.245  | 23.245  | 1.00 |
| P16622 | Ferrocyclase, mitochondrial [OS=Saccharomyces cerevisiae S288c]                                                                               | 854347 | HEM15; YOR176W | metabolic process                                                                                           | membrane;mitochondrion                       | catalytic activity                                                        | 6.305   | 6.305   | 1.00 |
| P43567 | alanine-glyoxylate aminotransferase 1 [OS=Saccharomyces cerevisiae S288c]                                                                     | 850514 | AGX1; YFL030W  | metabolic process                                                                                           | cytosol;mitochondrion                        | catalytic activity                                                        | 2.162   | 2.162   | 1.00 |
| Q03104 | Meiotic sister chromatid recombination protein 1 [OS=Saccharomyces cerevisiae S288c]                                                          | 854911 | MSC1; YML128C  | metabolic process                                                                                           | endoplasmic reticulum;membrane;mitochondrion |                                                                           | 2.415   | 2.415   | 1.00 |
| P39925 | Mitochondrial respiratory chain complexes assembly protein AFG3                                                                               | 856737 | AFG3; YER017   | cell organization and biogenesis;metabolic                                                                  | membrane;mitochondrion                       | catalytic activity;metal ion                                              | 1.342   | 1.342   | 1.00 |

|        |                                                                                                   |        |                        |                                                                                   |                                              |                                                                                        |        |        |      |
|--------|---------------------------------------------------------------------------------------------------|--------|------------------------|-----------------------------------------------------------------------------------|----------------------------------------------|----------------------------------------------------------------------------------------|--------|--------|------|
|        | [OS=Saccharomyces cerevisiae S288c]                                                               |        | C                      | process;response to stimulus;transport                                            |                                              | binding;nucleotide binding;protein binding                                             |        |        |      |
| P05626 | ATP synthase subunit 4, mitochondrial [OS=Saccharomyces cerevisiae S288c]                         | 856027 | ATP4; YPL078C          | cell organization and biogenesis;metabolic process;transport                      | membrane;mitochondrion                       | catalytic activity;transporter activity                                                | 4.995  | 4.995  | 1.00 |
| P53982 | isocitrate dehydrogenase [NADP] [OS=Saccharomyces cerevisiae S288c]                               | 855723 | IDP3; YNL009W          | metabolic process                                                                 | cytoplasm;mitochondrion                      | catalytic activity;metal ion binding;nucleotide binding                                | 2.652  | 2.652  | 1.00 |
| Q07651 | SUR7 family protein FMP45 [OS=Saccharomyces cerevisiae S288c]                                     | 851304 | FMP45; YDL222C         | cell differentiation;cell organization and biogenesis                             | membrane;mitochondrion                       |                                                                                        | 4.878  | 4.878  | 1.00 |
| P25039 | Elongation factor G, mitochondrial [OS=Saccharomyces cerevisiae S288c]                            | 850758 | MEF1; YLR069C          | cell organization and biogenesis;metabolic process                                | cytosol;mitochondrion                        | catalytic activity;nucleotide binding;RNA binding                                      | 0.931  | 0.931  | 1.00 |
| P10662 | 37S ribosomal protein MRP1, mitochondrial [OS=Saccharomyces cerevisiae S288c]                     | 851948 | MRP1; YDR347W          | cell organization and biogenesis;metabolic process;response to stimulus           | mitochondrion;ribosome                       | antioxidant activity;catalytic activity;metal ion binding;structural molecule activity | 2.981  | 2.981  | 1.00 |
| P42940 | Probable electron transfer flavoprotein subunit beta [OS=Saccharomyces cerevisiae S288c]          | 853121 | CIR1; YGR207C          | metabolic process;transport                                                       | mitochondrion;organelle lumen                |                                                                                        | 4.623  | 4.623  | 1.00 |
| P32317 | Protein AFG1 [OS=Saccharomyces cerevisiae S288c]                                                  | 856658 | AFG1; YEL052W          | cell organization and biogenesis;metabolic process;response to stimulus;transport | membrane;mitochondrion                       | catalytic activity;nucleotide binding                                                  | 1.326  | 1.326  | 1.00 |
| Q04438 | Stationary phase protein 4 [OS=Saccharomyces cerevisiae S288c]                                    | 855134 | SPG4; YMR107W          |                                                                                   |                                              |                                                                                        | 15.681 | 15.681 | 1.00 |
| P32787 | Mitochondrial genome maintenance protein MGM101 [OS=Saccharomyces cerevisiae S288c]               | 853609 | MGM101; YJR144W        | cell organization and biogenesis;metabolic process;response to stimulus           | chromosome;mitochondrion                     | DNA binding                                                                            | 3.281  | 3.281  | 1.00 |
| Q07349 | MIOREX complex component 9 [OS=Saccharomyces cerevisiae S288c]                                    | 851535 | YDL027C; MRX9; YDL027C |                                                                                   | endoplasmic reticulum;membrane;mitochondrion |                                                                                        | 1.913  | 1.913  | 1.00 |
| P53266 | Cytochrome oxidase assembly protein SHY1 [OS=Saccharomyces cerevisiae S288c]                      | 853009 | SHY1; YGR112W          | cell organization and biogenesis                                                  | membrane;mitochondrion                       | protein binding                                                                        | 1.154  | 1.154  | 1.00 |
| P81449 | ATP synthase subunit e, mitochondrial [OS=Saccharomyces cerevisiae S288c]                         | 851922 | TIM11; YDR322C-A       | cell organization and biogenesis;metabolic process;transport                      | membrane;mitochondrion                       | catalytic activity;structural molecule activity;transporter activity                   | 9      | 9      | 1.00 |
| P10834 | protein PET54 [OS=Saccharomyces cerevisiae S288c]                                                 | 853137 | PET54; YGR222W         | metabolic process;regulation of biological process                                | membrane;mitochondrion;organelle lumen       | nucleotide binding;RNA binding;translational regulator activity                        | 1.565  | 1.565  | 1.00 |
| P43594 | MICOS complex subunit MIC19 [OS=Saccharomyces cerevisiae S288c]                                   | 850563 | AIM13; MIC19; YFR011C  | cell organization and biogenesis                                                  | cytoplasm;membrane;mitochondrion             |                                                                                        | 4.337  | 4.337  | 1.00 |
| P23644 | Mitochondrial import receptor subunit TOM40 [OS=Saccharomyces cerevisiae S288c]                   | 855243 | TOM40; YMR203W         | transport                                                                         | cytosol;membrane;mitochondrion               | protein binding;transporter activity                                                   | 1.154  | 1.154  | 1.00 |
| P36141 | Putative redox protein fmp46, mitochondrial [OS=Saccharomyces cerevisiae S288c]                   | 853923 | FMP46; YKR049C         | metabolic process                                                                 | mitochondrion                                | catalytic activity;protein binding                                                     | 4.337  | 4.337  | 1.00 |
| P53206 | putative cysteine synthase [OS=Saccharomyces cerevisiae S288c]                                    | 852895 | YGR012W; YGR012W       | metabolic process                                                                 |                                              | catalytic activity                                                                     | 0.817  | 0.817  | 1.00 |
| P08466 | mitochondrial nuclease [OS=Saccharomyces cerevisiae S288c]                                        | 853222 | NUC1; YJL208C          | cell death;metabolic process                                                      | membrane;mitochondrion;nucleus               | catalytic activity;metal ion binding                                                   | 1.637  | 1.637  | 1.00 |
| Q12165 | ATP synthase subunit delta, mitochondrial [OS=Saccharomyces cerevisiae S288c]                     | 851560 | ATP16; YDL004W         | metabolic process;transport                                                       | membrane;mitochondrion                       | catalytic activity;transporter activity                                                | 4.623  | 4.623  | 1.00 |
| P21560 | Protein CBP3, mitochondrial [OS=Saccharomyces cerevisiae S288c]                                   | 855886 | CBP3; YPL215W          | cell organization and biogenesis;regulation of biological process                 | membrane;mitochondrion;ribosome              |                                                                                        | 1.424  | 1.424  | 1.00 |
| P04806 | Hexokinase-1 [OS=Saccharomyces cerevisiae S288c]                                                  | 850614 | HXK1; YFR053C          | cellular homeostasis;metabolic process;transport                                  | cytoplasm;cytosol;mitochondrion              | catalytic activity;nucleotide binding                                                  | 1.043  | 1.043  | 1.00 |
| Q03798 | Altered inheritance of mitochondria protein 36, mitochondrial [OS=Saccharomyces cerevisiae S288c] | 855189 | AIM36; YMR157C         |                                                                                   | membrane;mitochondrion                       |                                                                                        | 1.637  | 1.637  | 1.00 |
| P12686 | 37S ribosomal protein MRP13, mitochondrial [OS=Saccharomyces cerevisiae S288c]                    | 852975 | MRP13; YGR084C         | cell organization and biogenesis;metabolic process                                | mitochondrion;ribosome                       | structural molecule activity                                                           | 1.239  | 1.239  | 1.00 |
| P11325 | Leucine-tRNA ligase, mitochondrial [OS=Saccharomyces cerevisiae S288c]                            | 851098 | NAM2; YLR382           | cell organization and biogenesis;metabolic                                        | cytosol;mitochondrion;organelle lumen        | catalytic activity;nucleotide                                                          | 0.353  | 0.353  | 1.00 |

|        |                                                                                                           |        |                  |                                                                                                        |                                          |                                                             |       |       |      |
|--------|-----------------------------------------------------------------------------------------------------------|--------|------------------|--------------------------------------------------------------------------------------------------------|------------------------------------------|-------------------------------------------------------------|-------|-------|------|
|        | S288c]                                                                                                    |        | C                | process;regulation of biological process                                                               |                                          | binding;RNA binding                                         |       |       |      |
| Q04935 | Cytochrome c oxidase protein 20, mitochondrial [OS=Saccharomyces cerevisiae S288c]                        | 851817 | COX20; YDR231C   | cell organization and biogenesis;metabolic process                                                     | membrane;mitochondrion                   | protein binding                                             | 2.455 | 2.455 | 1.00 |
| P38825 | Protein TOM71 [OS=Saccharomyces cerevisiae S288c]                                                         | 856517 | TOM71; YHR117W   | transport                                                                                              | membrane;mitochondrion                   | protein binding;transporter activity                        | 0.512 | 0.512 | 1.00 |
| P37267 | Assembly factor cbp4 [OS=Saccharomyces cerevisiae S288c]                                                  |        | CBP4             | cell organization and biogenesis                                                                       | membrane;mitochondrion                   |                                                             | 7.111 | 7.111 | 1.00 |
| Q06678 | 54S ribosomal protein L35, mitochondrial [OS=Saccharomyces cerevisiae S288c]                              | 851921 | MRPL35; YDR322W  | cell organization and biogenesis;metabolic process                                                     | mitochondrion;ribosome                   | structural molecule activity                                | 1.031 | 1.031 | 1.00 |
| P40508 | Uncharacterized protein YIL077C [OS=Saccharomyces cerevisiae S288c]                                       | 854733 | YIL077C; YIL077C |                                                                                                        | mitochondrion                            |                                                             | 0.896 | 0.896 | 1.00 |
| P38072 | Protein SCO2, mitochondrial [OS=Saccharomyces cerevisiae S288c]                                           | 852312 | SCO2; YBR024W    | cell organization and biogenesis;cellular homeostasis;metabolic process;transport                      | membrane;mitochondrion                   | antioxidant activity;catalytic activity;metal ion binding   | 1.154 | 1.154 | 1.00 |
| P48569 | Uncharacterized protein YDL183C [OS=Saccharomyces cerevisiae S288c]                                       | 851345 | YDL183C; YDL183C | transport                                                                                              |                                          |                                                             | 1.069 | 1.069 | 1.00 |
| P00950 | Phosphoglycerate mutase 1 [OS=Saccharomyces cerevisiae S288c]                                             | 853705 | GPM1; YKL152C    | metabolic process;regulation of biological process                                                     | cytoplasm;cytosol;membrane;mitochondrion | catalytic activity                                          | 1.929 | 1.929 | 1.00 |
| Q04472 | Mitochondrial inner membrane i-AAA protease supercomplex subunit MGR3 [OS=Saccharomyces cerevisiae S288c] | 855142 | MGR3; YMR115W    | metabolic process                                                                                      | membrane;mitochondrion                   | protein binding                                             | 0.52  | 0.52  | 1.00 |
| Q12349 | ATP synthase subunit H, mitochondrial [OS=Saccharomyces cerevisiae S288c]                                 | 851002 | ATP14; YLR295C   | cell organization and biogenesis;metabolic process;transport                                           | membrane;mitochondrion                   | catalytic activity;transporter activity                     | 2.728 | 2.728 | 1.00 |
| P18496 | Mitochondrial ATPase complex subunit ATP10 [OS=Saccharomyces cerevisiae S288c]                            | 851109 | ATP10; YLR393W   | cell organization and biogenesis                                                                       | cytoplasm;membrane;mitochondrion         | protein binding                                             | 1.239 | 1.239 | 1.00 |
| Q04172 | Sensitive to high expression protein 9, mitochondrial [OS=Saccharomyces cerevisiae S288c]                 | 852002 | SHE9; YDR393W    | cell organization and biogenesis                                                                       | membrane;mitochondrion                   |                                                             | 0.374 | 0.374 | 1.00 |
| P40416 | Iron-sulfur clusters transporter ATM1, mitochondrial [OS=Saccharomyces cerevisiae S288c]                  | 855347 | ATM1; YMR301C    | cellular homeostasis;metabolic process;transport                                                       | membrane;mitochondrion                   | catalytic activity;nucleotide binding;transporter activity  | 0.453 | 0.453 | 1.00 |
| P40502 | Altered inheritance of mitochondria protein 19, mitochondrial [OS=Saccharomyces cerevisiae S288c]         | 854722 | AIM19; YIL087C   |                                                                                                        | membrane;mitochondrion                   |                                                             | 1.512 | 1.512 | 1.00 |
| P36516 | 54S ribosomal protein L3, mitochondrial [OS=Saccharomyces cerevisiae S288c]                               | 855039 | MRPL3; YMR024W   | cell organization and biogenesis;metabolic process;response to stimulus                                | mitochondrion;nucleus;ribosome           | catalytic activity;RNA binding;structural molecule activity | 0.743 | 0.743 | 1.00 |
| P38771 | Ribosome-recycling factor, mitochondrial [OS=Saccharomyces cerevisiae S288c]                              | 856433 | RRF1; YHR038W    | cell organization and biogenesis;metabolic process                                                     | mitochondrion                            | RNA binding                                                 | 1.254 | 1.254 | 1.00 |
| P32453 | Protein ATP11, mitochondrial [OS=Saccharomyces cerevisiae S288c]                                          | 855401 | ATP11; YNL315C   | cell organization and biogenesis                                                                       | mitochondrion                            | protein binding                                             | 1.239 | 1.239 | 1.00 |
| Q02981 | ABC1 family protein YPL109C, mitochondrial [OS=Saccharomyces cerevisiae S288c]                            | 855995 | YPL109C; YPL109C |                                                                                                        | mitochondrion                            |                                                             | 0.334 | 0.334 | 1.00 |
| P39002 | long-chain-fatty-acid--CoA ligase 3 [OS=Saccharomyces cerevisiae S288c]                                   | 854808 | FAA3; YIL009W    | metabolic process                                                                                      |                                          | catalytic activity;nucleotide binding                       | 0.334 | 0.334 | 1.00 |
| P25372 | Thioredoxin-3, mitochondrial [OS=Saccharomyces cerevisiae S288c]                                          | 850444 | TRX3; YCR083W    | cellular homeostasis;metabolic process;regulation of biological process;response to stimulus;transport | cytoplasm;mitochondrion                  | catalytic activity                                          | 2.511 | 2.511 | 1.00 |
| P38797 | Protein phosphatase 2C homolog 7, mitochondrial [OS=Saccharomyces cerevisiae S288c]                       | 856475 | PTC7; YHR076W    | metabolic process                                                                                      | mitochondrion                            | catalytic activity;metal ion binding;protein binding        | 0.688 | 0.688 | 1.00 |
| P40159 | Uncharacterized protein YNL208W [OS=Saccharomyces cerevisiae S288c]                                       | 855513 | YNL208W; YNL208W |                                                                                                        | membrane;mitochondrion;ribosome          |                                                             | 0.668 | 0.668 | 1.00 |
| Q12283 | Malonyl CoA-acyl carrier protein transacylase, mitochondrial [OS=Saccharomyces cerevisiae S288c]          | 854396 | MCT1; YOR221C    | metabolic process                                                                                      | mitochondrion                            | catalytic activity                                          | 0.896 | 0.896 | 1.00 |
| P38702 | mitochondrial carrier protein LEU5 [OS=Saccharomyces cerevisiae S288c]                                    | 856391 | LEU5; YHR002W    | metabolic process;transport                                                                            | membrane;mitochondrion                   | structural molecule activity;transporter activity           | 0.468 | 0.468 | 1.00 |
| P53732 | 37S ribosomal protein S12, mitochondrial [OS=Saccharomyces                                                | 855772 | MRPS12;          | cell organization and biogenesis;metabolic process                                                     | mitochondrion;ribosome                   | structural molecule activity                                | 1.783 | 1.783 | 1.00 |



|        |                                                                                                              |                           |                                                   |                                                                                                                                                            |                                                 |                                                                |       |       |      |  |
|--------|--------------------------------------------------------------------------------------------------------------|---------------------------|---------------------------------------------------|------------------------------------------------------------------------------------------------------------------------------------------------------------|-------------------------------------------------|----------------------------------------------------------------|-------|-------|------|--|
|        | cerevisiae S288c]                                                                                            |                           | YNR036<br>C                                       |                                                                                                                                                            |                                                 |                                                                |       |       |      |  |
| P28239 | Inorganic pyrophosphatase, mitochondrial [OS=Saccharomyces cerevisiae S288c]                                 | 85530<br>9                | PPA2;<br>YMR26<br>7W                              | metabolic process                                                                                                                                          | cytoplasm;mitochondrion                         | catalytic activity;metal ion binding                           | 0.585 | 0.585 | 1.00 |  |
| P14908 | Mitochondrial transcription factor 1 [OS=Saccharomyces cerevisiae S288c]                                     | 85526<br>8                | MTF1;<br>YMR22<br>8W                              | metabolic process;regulation of biological process                                                                                                         | mitochondrion;organelle lumen                   | catalytic activity;DNA binding;RNA binding                     | 0.585 | 0.585 | 1.00 |  |
| P36163 | mitochondrial metalloendopeptidase OMA1 [OS=Saccharomyces cerevisiae S288c]                                  | 85396<br>2                | OMA1;<br>YKR087<br>C                              | metabolic process                                                                                                                                          | membrane;mitochondrion                          | catalytic activity;metal ion binding                           | 0.73  | 0.73  | 1.00 |  |
| Q12233 | ATP synthase subunit g, mitochondrial [OS=Saccharomyces cerevisiae S288c]                                    | 85613<br>1                | ATP20;<br>YPR020<br>W                             | cell organization and biogenesis;metabolic process;transport                                                                                               | membrane;mitochondrion                          | catalytic activity;transporter activity                        | 1.371 | 1.371 | 1.00 |  |
| P37299 | cytochrome b-c1 complex subunit 10 [OS=Saccharomyces cerevisiae S288c]                                       | 85639<br>0                | QCR10;<br>YHR001<br>W-A                           | metabolic process;transport                                                                                                                                | membrane;mitochondrion                          | catalytic activity;transporter activity                        | 5.31  | 5.31  | 1.00 |  |
| P33421 | Succinate dehydrogenase [ubiquinone] cytochrome b subunit, mitochondrial [OS=Saccharomyces cerevisiae S288c] | 85371<br>6                | SDH3;<br>YKL141<br>W                              | cell organization and biogenesis;metabolic process;transport                                                                                               | membrane;mitochondrion                          | catalytic activity;metal ion binding                           | 1.276 | 1.276 | 1.00 |  |
| P23369 | 54S ribosomal protein L25, mitochondrial [OS=Saccharomyces cerevisiae S288c]                                 | 85296<br>7                | MRPL25<br>;<br>YGR076<br>C                        | cell organization and biogenesis;metabolic process                                                                                                         | mitochondrion;ribosome                          | structural molecule activity                                   | 1.31  | 1.31  | 1.00 |  |
| P48526 | Isoleucine-tRNA ligase, mitochondrial [OS=Saccharomyces cerevisiae S288c]                                    | 85606<br>7                | ISM1;<br>YPL040<br>C                              | cell organization and biogenesis;metabolic process;regulation of biological process                                                                        | cytoplasm;cytosol;mitochondrion;organelle lumen | catalytic activity;nucleotide binding                          | 0.215 | 0.215 | 1.00 |  |
| P04807 | Hexokinase-2 [OS=Saccharomyces cerevisiae S288c]                                                             | 85263<br>9                | HXK2;<br>YGL253<br>W                              | cell communication;cell organization and biogenesis;cellular homeostasis;metabolic process;regulation of biological process;response to stimulus;transport | cytosol;mitochondrion;nucleus                   | catalytic activity;nucleotide binding                          | 0.359 | 0.359 | 1.00 |  |
| P21306 | ATP synthase subunit epsilon, mitochondrial [OS=Saccharomyces cerevisiae S288c]                              | 85585<br>7                | ATP15;<br>YPL271<br>W                             | metabolic process;transport                                                                                                                                | membrane;mitochondrion                          | catalytic activity;transporter activity                        | 2.162 | 2.162 | 1.00 |  |
| Q06485 | Autophagy-related protein 33 [OS=Saccharomyces cerevisiae S288c]                                             | 85107<br>0                | ATG33;<br>YLR356<br>W                             | cell communication;metabolic process;response to stimulus                                                                                                  | membrane;mitochondrion                          |                                                                | 1.371 | 1.371 | 1.00 |  |
| Q08742 | Thiosulfate sulfurtransferase RDL2, mitochondrial [OS=Saccharomyces cerevisiae S288c]                        | 85446<br>0                | RDL2;<br>YOR286<br>W                              |                                                                                                                                                            | mitochondrion                                   | catalytic activity                                             | 0.52  | 0.52  | 1.00 |  |
| Q07914 | mitochondrial import inner membrane translocase subunit TIM14 [OS=Saccharomyces cerevisiae S288c]            | 85069<br>4                | PAM18;<br>YLR008<br>C                             | regulation of biological process;transport                                                                                                                 | membrane;mitochondrion                          | enzyme regulator activity;protein binding;transporter activity | 0.778 | 0.778 | 1.00 |  |
| Q03557 | Glutamyl-tRNA(Gln) amidotransferase subunit A, mitochondrial [OS=Saccharomyces cerevisiae S288c]             | 85533<br>8                | HER2;<br>YMR29<br>3C                              | cell organization and biogenesis;metabolic process                                                                                                         | mitochondrion                                   | catalytic activity;nucleotide binding                          | 0.259 | 0.259 | 1.00 |  |
| P38172 | MIOREX complex component 3 [OS=Saccharomyces cerevisiae S288c]                                               | 85218<br>1                | YBL095<br>W;<br>MRX3;<br>YBL095<br>W              |                                                                                                                                                            | membrane;mitochondrion                          |                                                                | 0.501 | 0.501 | 1.00 |  |
| P32785 | Methionyl-tRNA formyltransferase, mitochondrial [OS=Saccharomyces cerevisiae S288c]                          | 85227<br>0                | FMT1;<br>YBL013<br>W                              | metabolic process                                                                                                                                          | mitochondrion                                   | catalytic activity                                             | 0.179 | 0.179 | 1.00 |  |
| Q01976 | ADP-ribose pyrophosphatase [OS=Saccharomyces cerevisiae S288c]                                               | 85240<br>8                | YSA1;<br>YBR111<br>C                              | metabolic process                                                                                                                                          | cytoplasm;mitochondrion;nucleus                 | catalytic activity;metal ion binding                           | 0.425 | 0.425 | 1.00 |  |
| P43122 | tRNA N6-adenosine threonylcarbamoyltransferase, mitochondrial [OS=Saccharomyces cerevisiae S288c]            | 85145<br>4                | QRI7;<br>YDL104<br>C                              | cell organization and biogenesis;metabolic process                                                                                                         | mitochondrion                                   | catalytic activity;metal ion binding                           | 0.212 | 0.212 | 1.00 |  |
| P34224 | Uncharacterized protein YBL059W [OS=Saccharomyces cerevisiae S288c]                                          | 85222<br>1                | YBL059<br>W;<br>YBL059<br>W                       |                                                                                                                                                            | membrane;mitochondrion                          |                                                                | 0.468 | 0.468 | 1.00 |  |
| P21375 | Fumarate reductase 2 [OS=Saccharomyces cerevisiae S288c]                                                     | 85351<br>0                | OSM1;<br>YJR051<br>W                              | metabolic process                                                                                                                                          | endoplasmic reticulum;mitochondrion             | catalytic activity;nucleotide binding                          | 0.25  | 0.25  | 1.00 |  |
| P38175 | 37S ribosomal protein MRP21, mitochondrial [OS=Saccharomyces cerevisiae S288c]                               | 85218<br>8                | MRP21;<br>YBL090<br>W                             | cell organization and biogenesis;metabolic process                                                                                                         | mitochondrion;ribosome                          | structural molecule activity                                   | 0.701 | 0.701 | 1.00 |  |
| POCX31 | 40S ribosomal protein S24-A [OS=Saccharomyces cerevisiae S288c]                                              | 85680<br>5;<br>85474<br>1 | RPS24A<br>;<br>RPS24B;<br>YER074<br>W;<br>YIL069C | metabolic process                                                                                                                                          | cytoplasm;mitochondrion;ribosome                | nucleotide binding;structural molecule activity                | 0.585 | 0.585 | 1.00 |  |
| Q03429 | Mitochondrial zinc maintenance protein 1, mitochondrial [OS=Saccharomyces cerevisiae S288c]                  | 85210<br>4                | MZM1;<br>YDR493<br>W                              | cell organization and biogenesis;metabolic process                                                                                                         | mitochondrion;organelle lumen                   | protein binding                                                | 0.334 | 0.334 | 1.00 |  |

|        |                                                                                                    |         |                        |                                                                                                                           |                                                 |                                                                   |       |       |      |
|--------|----------------------------------------------------------------------------------------------------|---------|------------------------|---------------------------------------------------------------------------------------------------------------------------|-------------------------------------------------|-------------------------------------------------------------------|-------|-------|------|
| O74700 | Mitochondrial import inner membrane translocase subunit Tim9 [OS=Saccharomyces cerevisiae S288c]   | 856693  | TIM9; YEL020 W-A       | cell organization and biogenesis;transport                                                                                | membrane;mitochondrion                          | metal ion binding;protein binding;transporter activity            | 0.468 | 0.468 | 1.00 |
| P18409 | Mitochondrial distribution and morphology protein 10 [OS=Saccharomyces cerevisiae S288c]           | 851223  | MDM10 ; YAL010 C       | cell organization and biogenesis;transport                                                                                | membrane;mitochondrion                          | protein binding                                                   | 0.16  | 0.16  | 1.00 |
| P38876 | peptidyl-tRNA hydrolase [OS=Saccharomyces cerevisiae S288c]                                        | 856596  | PTH1; YHR189 W         | cell organization and biogenesis;metabolic process                                                                        | mitochondrion                                   | catalytic activity                                                | 0.194 | 0.194 | 1.00 |
| P00420 | Cytochrome c oxidase subunit 3 [OS=Saccharomyces cerevisiae S288c]                                 | 854627  | COX3; Q0275            | metabolic process;transport                                                                                               | membrane;mitochondrion                          | catalytic activity;transporter activity                           | 3.642 | 3.642 | 1.00 |
| P34251 | Uncharacterized oxidoreductase YKL107W [OS=Saccharomyces cerevisiae S288c]                         | 853753  | YKL107 W; YKL107 W     | metabolic process                                                                                                         | membrane                                        | catalytic activity                                                | 0.438 | 0.438 | 1.00 |
| P22438 | Methionine--tRNA ligase, mitochondrial [OS=Saccharomyces cerevisiae S288c]                         | 853081  | MSR1; YGR171 C         | metabolic process                                                                                                         | cytoplasm;cytosol;mitochondrion;organelle lumen | catalytic activity;nucleotide binding                             | 0.136 | 0.136 | 1.00 |
| P41735 | 5-demethoxyubiquinone hydroxylase, mitochondrial [OS=Saccharomyces cerevisiae S288c]               | 854292  | CAT5; YOR125 C         | metabolic process                                                                                                         | membrane;mitochondrion                          | catalytic activity;metal ion binding                              | 0.334 | 0.334 | 1.00 |
| Q3E7A4 | COX assembly mitochondrial protein 2 [OS=Saccharomyces cerevisiae S288c]                           | 852220  | CMC2; YBL059 C-A       | cell organization and biogenesis                                                                                          | cytoplasm;membrane;mitochondrion;nucleus        | metal ion binding                                                 | 0.931 | 0.931 | 1.00 |
| Q12375 | mitochondrial ornithine transporter 1 [OS=Saccharomyces cerevisiae S288c]                          | 854297  | ORT1; YOR130 C         | metabolic process;transport                                                                                               | membrane;mitochondrion                          | structural molecule activity;transporter activity                 | 0.334 | 0.334 | 1.00 |
| Q12328 | Mitochondrial import inner membrane translocase subunit TIM22 [OS=Saccharomyces cerevisiae S288c]  | 851309  | TIM22; YDL217 C        | cell organization and biogenesis;transport                                                                                | cytosol;membrane;mitochondrion                  | protein binding;transporter activity                              | 0.233 | 0.233 | 1.00 |
| P01098 | ATPase-stabilizing factor 9 kDa, mitochondrial [OS=Saccharomyces cerevisiae S288c]                 | 851426  | STF1; YDL130 W-A       | metabolic process;regulation of biological process                                                                        | mitochondrion                                   | catalytic activity;enzyme regulator activity;protein binding      | 2.162 | 2.162 | 1.00 |
| P28627 | mitochondrial inner membrane protease subunit 1 [OS=Saccharomyces cerevisiae S288c]                | 855182  | IMP1; YMR15 OC         | cell organization and biogenesis;metabolic process                                                                        | membrane;mitochondrion                          | catalytic activity                                                | 0.425 | 0.425 | 1.00 |
| P53081 | NGG1-interacting factor 3 [OS=Saccharomyces cerevisiae S288c]                                      | 852651  | NIF3; YGL221 C         |                                                                                                                           | cytoplasm;mitochondrion                         |                                                                   | 0.501 | 0.501 | 1.00 |
| P14063 | 54S ribosomal protein L31, mitochondrial [OS=Saccharomyces cerevisiae S288c]                       | 853720  | MRPL31 ; YKL138 C      | cell organization and biogenesis;metabolic process                                                                        | mitochondrion;ribosome                          | structural molecule activity                                      | 0.668 | 0.668 | 1.00 |
| P28737 | Protein MSP1 [OS=Saccharomyces cerevisiae S288c]                                                   | 852915  | MSP1; YGR028 W         | cell organization and biogenesis;metabolic process;regulation of biological process;response to stimulus;transport        | membrane;mitochondrion;nucleus                  | catalytic activity;nucleotide binding;protein binding;RNA binding | 0.259 | 0.259 | 1.00 |
| Q3E6R5 | uncharacterized mitochondrial outer membrane protein YDR381C-A [OS=Saccharomyces cerevisiae S288c] | 851989  | YDR381 C-A; YDR381 C-A |                                                                                                                           | membrane;mitochondrion                          |                                                                   | 0.389 | 0.389 | 1.00 |
| P32378 | 4-hydroxybenzoate polyprenyltransferase, mitochondrial [OS=Saccharomyces cerevisiae S288c]         | 855778  | COQ2; YNR041 C         | metabolic process;transport                                                                                               | membrane;mitochondrion                          | catalytic activity                                                | 0.292 | 0.292 | 1.00 |
| Q07821 | Iron-sulfur assembly protein 1 [OS=Saccharomyces cerevisiae S288c]                                 | 850632  | ISA1; YLL027 W         | cell organization and biogenesis;metabolic process                                                                        | mitochondrion;organelle lumen                   | metal ion binding;structural molecule activity                    | 0.136 | 0.136 | 1.00 |
| Q00402 | Nuclear migration protein NUM1 [OS=Saccharomyces cerevisiae S288c]                                 | 851727  | NUM1; YDR150 W         | cell organization and biogenesis;cellular component movement;metabolic process;regulation of biological process;transport | endoplasmic reticulum;mitochondrion             | catalytic activity;motor activity;protein binding                 | 0.025 | 0.025 | 1.00 |
| Q01802 | Aspartate aminotransferase, mitochondrial [OS=Saccharomyces cerevisiae S288c]                      | 853755  | AAT1; YKL106 W         | metabolic process                                                                                                         | mitochondrion;organelle lumen                   | catalytic activity;protein binding                                | 0.075 | 0.075 | 1.00 |
| Q2V2P9 | Uncharacterized protein YDR119W-A [OS=Saccharomyces cerevisiae S288c]                              | 3799970 | COX26; YDR119 W-A      |                                                                                                                           | membrane;mitochondrion                          |                                                                   | 1.154 | 1.154 | 1.00 |
| P32463 | Acyl carrier protein, mitochondrial [OS=Saccharomyces cerevisiae S288c]                            | 853642  | ACP1; YKL192 C         | metabolic process;transport                                                                                               | mitochondrion                                   |                                                                   | 0.259 | 0.259 | 1.00 |
| P42844 | Mitochondrial protein import protein ZIM17 [OS=Saccharomyces cerevisiae S288c]                     | 855406  | ZIM17; YNL310 C        | cell organization and biogenesis;metabolic process;regulation of biological process;response to stimulus;transport        | membrane;mitochondrion;organelle lumen          | metal ion binding;protein binding                                 | 0.585 | 0.585 | 1.00 |
| Q3E846 | Cytochrome c oxidase assembly factor 6 [OS=Saccharomyces cerevisiae S288c]                         | 855287  | COA6; YMR24 4C-A;      | cell organization and biogenesis;cellular homeostasis;metabolic                                                           | cytoplasm;membrane;mitochondrion;nucleus        | catalytic activity;metal ion binding;protein                      | 0.931 | 0.931 | 1.00 |

|          |                                                                                                                      |            |                             |                                                                                                          |                                         |                                                                         |            |            |      |
|----------|----------------------------------------------------------------------------------------------------------------------|------------|-----------------------------|----------------------------------------------------------------------------------------------------------|-----------------------------------------|-------------------------------------------------------------------------|------------|------------|------|
|          |                                                                                                                      |            | YMR24<br>4C-A               | process;transport                                                                                        |                                         | binding;transporter<br>activity                                         |            |            |      |
| P32048   | Lysine--tRNA ligase, mitochondrial [OS=Saccharomyces cerevisiae S288c]                                               | 85565<br>1 | MSK1;<br>YNL073<br>W        | cell organization and biogenesis;metabolic process;transport                                             | cytoplasm;mitochondrion;organelle lumen | catalytic activity;nucleotide binding;RNA binding                       | 0.059      | 0.059      | 1.00 |
| P04039   | Cytochrome c oxidase polypeptide VIII, mitochondrial [OS=Saccharomyces cerevisiae S288c]                             | 85111<br>1 | COX8;<br>YLR395<br>C        | metabolic process;transport                                                                              | membrane;mitochondrion                  | catalytic activity;transporter activity                                 | 0.778      | 0.778      | 1.00 |
| P38812   | Phosphatidylglycerophosphatase GEP4, mitochondrial [OS=Saccharomyces cerevisiae S288c]                               | 85650<br>0 | GEP4;<br>YHR100<br>C        | metabolic process                                                                                        | membrane;mitochondrion;organelle lumen  | catalytic activity                                                      | 0.179      | 0.179      | 1.00 |
| Q06089   | Uncharacterized mitochondrial outer membrane protein YPR098C [OS=Saccharomyces cerevisiae S288c]                     | 85621<br>3 | YPR098<br>C;<br>YPR098<br>C |                                                                                                          | membrane;mitochondrion                  |                                                                         | 2.162      | 2.162      | 1.00 |
| P32792   | UPF0744 protein YSC83 [OS=Saccharomyces cerevisiae S288c]                                                            | 85641<br>0 | YSC83;<br>YHR017<br>W       |                                                                                                          | membrane;mitochondrion                  |                                                                         | 0.11       | 0.11       | 1.00 |
| Q12487   | 54S ribosomal protein L23, mitochondrial [OS=Saccharomyces cerevisiae S288c]                                         | 85432<br>1 | MRPL23<br>;<br>YOR150<br>W  | cell organization and biogenesis;metabolic process                                                       | mitochondrion;ribosome;vacuole          | RNA binding;structural molecule activity                                | 0.233      | 0.233      | 1.00 |
| P18411   | Protein FUN14 [OS=Saccharomyces cerevisiae S288c]                                                                    | 85122<br>5 | FUN14;<br>YAL008<br>W       | metabolic process                                                                                        | membrane;mitochondrion                  |                                                                         | 0.194      | 0.194      | 1.00 |
| P10174   | cytochrome c oxidase subunit 7 [OS=Saccharomyces cerevisiae S288c]                                                   | 85529<br>8 | COX7;<br>YMR25<br>6C        | metabolic process;transport                                                                              | membrane;mitochondrion                  | catalytic activity;transporter activity                                 | 1.154      | 1.154      | 1.00 |
| P27882   | Mitochondrial FAD-linked sulfhydryl oxidase erv1 [OS=Saccharomyces cerevisiae S288c]                                 | 85291<br>6 | ERV1;<br>YGR029<br>W        | cellular homeostasis;metabolic process;response to stimulus;transport                                    | mitochondrion                           | catalytic activity;protein binding                                      | 0.212      | 0.212      | 1.00 |
| P53318   | Ubiquinone biosynthesis monooxygenase COQ6, mitochondrial [OS=Saccharomyces cerevisiae S288c]                        | 85317<br>0 | COQ6;<br>YGR255<br>C        | metabolic process                                                                                        | membrane;mitochondrion                  | catalytic activity;nucleotide binding                                   | 0.077      | 0.077      | 1.00 |
| Q05779   | Ubiquinone biosynthesis protein COQ9, mitochondrial [OS=Saccharomyces cerevisiae S288c]                              | 85089<br>8 | COQ9;<br>YLR201<br>C        | metabolic process                                                                                        | membrane;mitochondrion                  |                                                                         | 0.166      | 0.166      | 1.00 |
| Q02863   | ubiquitin carboxyl-terminal hydrolase 16 [OS=Saccharomyces cerevisiae S288c]                                         | 85603<br>2 | UBP16;<br>YPL072<br>W       | metabolic process                                                                                        | membrane;mitochondrion                  | catalytic activity                                                      | 0.072      | 0.072      | 1.00 |
| P39103   | Cytochrome c oxidase assembly protein COX14 [OS=Saccharomyces cerevisiae S288c]                                      | 85491<br>0 | COX14;<br>YML129<br>C       | cell organization and biogenesis;regulation of biological process                                        | membrane;mitochondrion;organelle lumen  | protein binding                                                         | 0.585      | 0.585      | 1.00 |
| P25578   | CDP-diacylglycerol--glycerol-3-phosphate 3-phosphatidyltransferase [OS=Saccharomyces cerevisiae S288c]               | 85035<br>2 | PGS1;<br>YCL004<br>W        | metabolic process                                                                                        | mitochondrion                           | catalytic activity;nucleotide binding                                   | 0.083      | 0.083      | 1.00 |
| Q03702   | Cruciform cutting endonuclease 1, mitochondrial [OS=Saccharomyces cerevisiae S288c]                                  | 85385<br>8 | CCE1;<br>YKL011<br>C        | cell organization and biogenesis;metabolic process                                                       | membrane;mitochondrion                  | catalytic activity;DNA binding;metal ion binding                        | 0.105      | 0.105      | 1.00 |
| P32388   | 54S ribosomal protein MRP49, mitochondrial [OS=Saccharomyces cerevisiae S288c]                                       | 85368<br>7 | MRP49;<br>YKL167<br>C       | cell organization and biogenesis;metabolic process                                                       | mitochondrion;ribosome                  | structural molecule activity                                            | 0.259      | 0.259      | 1.00 |
| P53848   | Folic acid synthesis protein fol1 [OS=Saccharomyces cerevisiae S288c]                                                | 85546<br>5 | FOL1;<br>YNL256<br>W        | metabolic process                                                                                        | cytoplasm;membrane;mitochondrion        | catalytic activity;metal ion binding;nucleotide binding                 | 0.045      | 0.045      | 1.00 |
| P38271   | Protein OPY1 [OS=Saccharomyces cerevisiae S288c]                                                                     | 85242<br>6 | OPY1;<br>YBR129<br>C        |                                                                                                          | cytoplasm;mitochondrion                 |                                                                         | 0.129      | 0.129      | 1.00 |
| P36775   | Lon protease homolog, mitochondrial [OS=Saccharomyces cerevisiae S288c]                                              | 85225<br>9 | PIM1;<br>YBL022<br>C        | cell organization and biogenesis;metabolic process;regulation of biological process;response to stimulus | cytoplasm;mitochondrion;organelle lumen | catalytic activity;DNA binding;nucleotide binding;RNA binding           | 1.362      | 1.436      | 1.05 |
| P49095   | Glycine dehydrogenase (Decarboxylating), mitochondrial [OS=Saccharomyces cerevisiae S288c]                           | 85522<br>7 | GCV2;<br>YMR18<br>9W        | metabolic process                                                                                        | cytosol;mitochondrion                   | catalytic activity                                                      | 2.433      | 2.577      | 1.06 |
| P32796-1 | Carnitine O-acetyltransferase, mitochondrial [OS=Saccharomyces cerevisiae S288c]                                     | 85496<br>5 | CAT2;<br>YML042<br>W        | metabolic process;transport                                                                              | membrane;mitochondrion                  | catalytic activity                                                      | 13.81<br>6 | 14.67<br>2 | 1.06 |
| Q08822   | Probable electron transfer flavoprotein-ubiquinone oxidoreductase, mitochondrial [OS=Saccharomyces cerevisiae S288c] | 85453<br>8 | CIR2;<br>YOR356<br>W        | metabolic process;transport                                                                              | membrane;mitochondrion                  | catalytic activity;metal ion binding;nucleotide binding                 | 3.424      | 3.642      | 1.06 |
| P21954   | Isocitrate dehydrogenase [NADP], mitochondrial [OS=Saccharomyces cerevisiae S288c]                                   | 85149<br>3 | IDP1;<br>YDL066<br>W        | metabolic process                                                                                        | mitochondrion                           | catalytic activity;metal ion binding;nucleotide binding;protein binding | 38.81<br>1 | 41.98<br>7 | 1.08 |

|        |                                                                                                           |        |                 |                                                                                               |                                                          |                                                                                     |        |        |      |
|--------|-----------------------------------------------------------------------------------------------------------|--------|-----------------|-----------------------------------------------------------------------------------------------|----------------------------------------------------------|-------------------------------------------------------------------------------------|--------|--------|------|
| Q12166 | 2-isopropylmalate synthase 2, mitochondrial [OS=Saccharomyces cerevisiae S288c]                           | 854275 | LEU9; YOR108W   | metabolic process                                                                             | mitochondrion                                            | catalytic activity;protein binding                                                  | 2.472  | 2.695  | 1.09 |
| P07257 | Cytochrome b-c1 complex subunit 2, mitochondrial [OS=Saccharomyces cerevisiae S288c]                      | 856321 | QCR2; YPR191W   | metabolic process;transport                                                                   | membrane;mitochondrion                                   | catalytic activity;metal ion binding;protein binding;transporter activity           | 36.751 | 40.246 | 1.10 |
| Q02776 | Mitochondrial import inner membrane translocase subunit TIM50 [OS=Saccharomyces cerevisiae S288c]         | 856042 | TIM50; YPL063W  | cell organization and biogenesis;metabolic process;transport                                  | membrane;mitochondrion                                   | catalytic activity;protein binding;transporter activity                             | 9      | 9.857  | 1.10 |
| P48015 | Aminomethyltransferase, mitochondrial [OS=Saccharomyces cerevisiae S288c]                                 | 851582 | GCV1; YDR019C   | metabolic process                                                                             | mitochondrion                                            | catalytic activity;protein binding                                                  | 9      | 10.053 | 1.12 |
| P38077 | ATP synthase subunit gamma, mitochondrial [OS=Saccharomyces cerevisiae S288c]                             | 852327 | ATP3; YBR039W   | metabolic process;transport                                                                   | membrane;mitochondrion                                   | catalytic activity;transporter activity                                             | 12.689 | 14.199 | 1.12 |
| Q08023 | Protein FMP25, mitochondrial [OS=Saccharomyces cerevisiae S288c]                                          | 850766 | FMP25; YLR077W  | cell organization and biogenesis                                                              | membrane;mitochondrion                                   |                                                                                     | 1.412  | 1.581  | 1.12 |
| P38891 | Branched-chain-amino-acid aminotransferase, mitochondrial [OS=Saccharomyces cerevisiae S288c]             | 856615 | BAT1; YHR208W   | metabolic process;regulation of biological process;response to stimulus                       | mitochondrion;organelle lumen                            | catalytic activity                                                                  | 9      | 10.103 | 1.12 |
| P50085 | Prohibitin-2 [OS=Saccharomyces cerevisiae S288c]                                                          | 853146 | PHB2; YGR231C   | cell organization and biogenesis;metabolic process;regulation of biological process           | membrane;mitochondrion                                   | protein binding                                                                     | 4.926  | 5.579  | 1.13 |
| P19882 | heat shock protein 60, mitochondrial [OS=Saccharomyces cerevisiae S288c]                                  | 850963 | HSP60; YLR259C  | cell organization and biogenesis;metabolic process;regulation of biological process;transport | cytoplasm;cytosol;membrane;mitochondrion;organelle lumen | catalytic activity;DNA binding;nucleotide binding;protein binding                   | 22.357 | 25.367 | 1.13 |
| P36060 | NADH-cytochrome b5 reductase 2 [OS=Saccharomyces cerevisiae S288c]                                        | 853707 | MCR1; YKL150W   | metabolic process;response to stimulus                                                        | membrane;mitochondrion                                   | catalytic activity;protein binding                                                  | 15.238 | 17.33  | 1.14 |
| P28834 | Isocitrate dehydrogenase [NAD] subunit 1, mitochondrial [OS=Saccharomyces cerevisiae S288c]               | 855691 | IDH1; YNL037C   | metabolic process;transport                                                                   | cytosol;mitochondrion;organelle lumen                    | catalytic activity;metal ion binding;nucleotide binding;protein binding;RNA binding | 15.238 | 17.33  | 1.14 |
| P04710 | ADP,ATP carrier protein 1 [OS=Saccharomyces cerevisiae S288c]                                             | 855078 | AAC1; YMR056C   | metabolic process;transport                                                                   | cytosol;membrane;mitochondrion                           | structural molecule activity;transporter activity                                   | 11.743 | 13.384 | 1.14 |
| P25573 | Mitochondrial inner membrane i-AAA protease supercomplex subunit MGR1 [OS=Saccharomyces cerevisiae S288c] | 850313 | MGR1; YCL044C   | metabolic process                                                                             | membrane;mitochondrion                                   | protein binding                                                                     | 1.649  | 1.894  | 1.15 |
| P09457 | ATP synthase subunit 5, mitochondrial [OS=Saccharomyces cerevisiae S288c]                                 | 851892 | ATP5; YDR298C   | metabolic process;transport                                                                   | membrane;mitochondrion                                   | catalytic activity;transporter activity                                             | 9      | 10.365 | 1.15 |
| P38988 | Mitochondrial GTP/GDP carrier protein 1 [OS=Saccharomyces cerevisiae S288c]                               | 851329 | GGC1; YDL198C   | cell organization and biogenesis;cellular homeostasis;metabolic process;transport             | membrane;mitochondrion                                   | structural molecule activity;transporter activity                                   | 3.16   | 3.642  | 1.15 |
| Q12031 | Mitochondrial 2-methylisocitrate lyase [OS=Saccharomyces cerevisiae S288c]                                | 856114 | ICL2; YPR006C   | metabolic process                                                                             | mitochondrion;organelle lumen                            | catalytic activity                                                                  | 5.158  | 5.952  | 1.15 |
| P00431 | cytochrome c peroxidase, mitochondrial [OS=Saccharomyces cerevisiae S288c]                                | 853940 | CCP1; YKR066C   | metabolic process;response to stimulus                                                        | mitochondrion;organelle lumen                            | antioxidant activity;catalytic activity;metal ion binding;protein binding           | 1.424  | 1.649  | 1.16 |
| P53292 | 37S ribosomal protein S35, mitochondrial [OS=Saccharomyces cerevisiae S288c]                              | 853075 | MRP535; YGR165W | cell organization and biogenesis;metabolic process                                            | mitochondrion;ribosome                                   | structural molecule activity                                                        | 1.512  | 1.754  | 1.16 |
| Q12230 | Sphingolipid long chain base-responsive protein LSP1 [OS=Saccharomyces cerevisiae S288c]                  | 856103 | LSP1; YPL004C   | regulation of biological process;response to stimulus;transport                               | cytoplasm;membrane;mitochondrion                         |                                                                                     | 24.119 | 28.286 | 1.17 |
| P00924 | Enolase 1 [OS=Saccharomyces cerevisiae S288c]                                                             | 853169 | ENO1; YGR254W   | metabolic process;regulation of biological process                                            | cytoplasm;cytosol;membrane;mitochondrion;vacuole         | catalytic activity;metal ion binding;protein binding                                | 0.848  | 0.995  | 1.17 |
| P38969 | Pentamidine resistance factor, mitochondrial [OS=Saccharomyces cerevisiae S288c]                          | 854440 | PNT1; YOR266W   | cell organization and biogenesis;response to stimulus                                         | membrane;mitochondrion                                   |                                                                                     | 0.848  | 0.995  | 1.17 |
| P15424 | ATP-dependent RNA helicase MSS116, mitochondrial [OS=Saccharomyces cerevisiae S288c]                      | 851775 | MSS116; YDR194C | metabolic process;regulation of biological process                                            | mitochondrion;organelle lumen                            | catalytic activity;nucleotide binding;RNA binding                                   | 1.644  | 1.929  | 1.17 |
| P32340 | Rotenone-insensitive NADH-ubiquinone oxidoreductase, mitochondrial [OS=Saccharomyces cerevisiae S288c]    | 854919 | NDI1; YML120C   | metabolic process;regulation of biological process                                            | membrane;mitochondrion;organelle lumen                   | catalytic activity;nucleotide binding                                               | 24.929 | 29.392 | 1.18 |

|        |                                                                                                      |        |                 |                                                                                      |                                                 |                                                                         |        |        |      |
|--------|------------------------------------------------------------------------------------------------------|--------|-----------------|--------------------------------------------------------------------------------------|-------------------------------------------------|-------------------------------------------------------------------------|--------|--------|------|
| P53140 | Protein RMD9, mitochondrial [OS=Saccharomyces cerevisiae S288c]                                      | 852771 | RMD9; YGL107C   | cell differentiation;metabolic process;regulation of biological process              | membrane;mitochondrion                          | RNA binding                                                             | 1.512  | 1.783  | 1.18 |
| P08417 | fumarate hydratase, mitochondrial [OS=Saccharomyces cerevisiae S288c]                                | 855866 | FUM1; YPL262W   | cell organization and biogenesis;metabolic process                                   | cytoplasm;cytosol;mitochondrion;organelle lumen | catalytic activity                                                      | 13.874 | 16.433 | 1.18 |
| Q01217 | Protein ARG5,6, mitochondrial [OS=Saccharomyces cerevisiae S288c]                                    | 856800 | ARG5,6; YER069W | metabolic process;regulation of biological process                                   | cytoplasm;mitochondrion;organelle lumen         | catalytic activity;nucleotide binding;protein binding                   | 0.286  | 0.341  | 1.19 |
| P06168 | ketol-acid reductoisomerase, mitochondrial [OS=Saccharomyces cerevisiae S288c]                       | 851069 | ILV5; YLR355C   | cell organization and biogenesis;metabolic process                                   | mitochondrion                                   | catalytic activity;DNA binding;metal ion binding                        | 12.895 | 15.379 | 1.19 |
| P32860 | NifU-like protein, mitochondrial [OS=Saccharomyces cerevisiae S288c]                                 | 853826 | NFU1; YKL040C   | cell organization and biogenesis;cellular homeostasis;metabolic process              | mitochondrion;organelle lumen                   | metal ion binding                                                       | 3.87   | 4.623  | 1.19 |
| Q02486 | ARS-binding factor 2, mitochondrial [OS=Saccharomyces cerevisiae S288c]                              | 855094 | ABF2; YMR072W   | cell organization and biogenesis;metabolic process;regulation of biological process  | chromosome;mitochondrion;nucleus                | DNA binding                                                             | 69.17  | 82.768 | 1.20 |
| P37293 | N-terminal acetyltransferase 2 [OS=Saccharomyces cerevisiae S288c]                                   | 853050 | NAT2; YGR147C   | metabolic process                                                                    | cytoplasm;mitochondrion                         | catalytic activity                                                      | 1.404  | 1.683  | 1.20 |
| P02992 | elongation factor Tu, mitochondrial [OS=Saccharomyces cerevisiae S288c]                              | 854359 | TUF1; YOR187W   | cell organization and biogenesis;metabolic process                                   | mitochondrion                                   | catalytic activity;nucleotide binding;RNA binding                       | 30.623 | 36.751 | 1.20 |
| P40008 | Protein FMP52, mitochondrial [OS=Saccharomyces cerevisiae S288c]                                     | 856721 | FMP52; YER004W  |                                                                                      | endoplasmic reticulum;membrane;mitochondrion    | catalytic activity                                                      | 3.217  | 3.87   | 1.20 |
| P48527 | Tyrosine-tRNA ligase, mitochondrial [OS=Saccharomyces cerevisiae S288c]                              | 856007 | MSY1; YPL097W   | metabolic process                                                                    | cytoplasm;cytosol;mitochondrion;organelle lumen | catalytic activity;nucleotide binding;RNA binding                       | 0.52   | 0.63   | 1.21 |
| P30902 | ATP synthase subunit d, mitochondrial [OS=Saccharomyces cerevisiae S288c]                            | 853853 | ATP7; YKL016C   | metabolic process;transport                                                          | membrane;mitochondrion                          | catalytic activity;transporter activity                                 | 5.105  | 6.197  | 1.21 |
| P08067 | cytochrome b-c1 complex subunit Rieske, mitochondrial [OS=Saccharomyces cerevisiae S288c]            | 856689 | RIP1; YEL024W   | metabolic process;transport                                                          | membrane;mitochondrion                          | catalytic activity;metal ion binding;transporter activity               | 55.234 | 67.129 | 1.22 |
| Q08223 | Altered inheritance of mitochondria protein 39, mitochondrial [OS=Saccharomyces cerevisiae S288c]    | 854103 | AIM39; YOL053W  |                                                                                      | cytosol;membrane;mitochondrion                  |                                                                         | 0.585  | 0.711  | 1.22 |
| P54783 | D-arabinono-1,4-lactone oxidase [OS=Saccharomyces cerevisiae S288c]                                  | 854888 | ALO1; YML086C   | metabolic process;response to stimulus                                               | membrane;mitochondrion                          | catalytic activity;nucleotide binding                                   | 3.299  | 4.012  | 1.22 |
| P00175 | Cytochrome b2, mitochondrial [OS=Saccharomyces cerevisiae S288c]                                     | 854950 | CYB2; YML054C   | metabolic process;transport                                                          | cytosol;membrane;mitochondrion;nucleus          | catalytic activity;metal ion binding;nucleotide binding                 | 1.239  | 1.512  | 1.22 |
| P25719 | Peptidyl-prolyl cis-trans isomerase C, mitochondrial [OS=Saccharomyces cerevisiae S288c]             | 854897 | CPR3; YML078W   | cell death;metabolic process                                                         | mitochondrion;organelle lumen                   | catalytic activity                                                      | 2.981  | 3.642  | 1.22 |
| P00447 | Superoxide dismutase [Mn], mitochondrial [OS=Saccharomyces cerevisiae S288c]                         | 856399 | SOD2; YHR008C   | metabolic process;response to stimulus                                               | mitochondrion;organelle lumen                   | antioxidant activity;catalytic activity;metal ion binding               | 6.017  | 7.377  | 1.23 |
| P40341 | Mitochondrial respiratory chain complexes assembly protein YTA12 [OS=Saccharomyces cerevisiae S288c] | 855114 | YTA12; YMR089C  | cell organization and biogenesis;metabolic process;response to stimulus;transport    | cytoplasm;membrane;mitochondrion                | catalytic activity;metal ion binding;nucleotide binding;protein binding | 1.371  | 1.683  | 1.23 |
| P23833 | Protein SCO1, mitochondrial [OS=Saccharomyces cerevisiae S288c]                                      | 852325 | SCO1; YBR037C   | cell organization and biogenesis;cellular homeostasis;response to stimulus;transport | membrane;mitochondrion                          | antioxidant activity;catalytic activity;metal ion binding               | 1.448  | 1.783  | 1.23 |
| P32331 | Carrier protein YMC1, mitochondrial [OS=Saccharomyces cerevisiae S288c]                              | 856171 | YMC1; YPR058W   | metabolic process;transport                                                          | membrane;mitochondrion;vacuole                  | structural molecule activity;transporter activity                       | 1.581  | 1.955  | 1.24 |
| Q08968 | UPF0061 protein FMP40 [OS=Saccharomyces cerevisiae S288c]                                            | 855879 | FMP40; YPL222W  |                                                                                      | mitochondrion                                   | protein binding                                                         | 2.162  | 2.675  | 1.24 |
| P32891 | D-lactate dehydrogenase [cytochrome] 1, mitochondrial [OS=Saccharomyces cerevisiae S288c]            | 851380 | DLD1; YDL174C   | metabolic process;transport                                                          | membrane;mitochondrion                          | catalytic activity;nucleotide binding                                   | 18.684 | 23.119 | 1.24 |
| P04037 | cytochrome c oxidase subunit 4, mitochondrial [OS=Saccharomyces cerevisiae S288c]                    | 852688 | COX4; YGL187C   | cell organization and biogenesis;metabolic process;transport                         | membrane;mitochondrion                          | catalytic activity;metal ion binding;transporter activity               | 42.288 | 52.367 | 1.24 |
| P53219 | Abhydrolase domain-containing protein IMO32 [OS=Saccharomyces cerevisiae S288c]                      | 852919 | IMO32; YGR031W  | metabolic process;transport                                                          | mitochondrion                                   | catalytic activity                                                      | 0.931  | 1.154  | 1.24 |
| P00427 | Cytochrome c oxidase subunit 6, mitochondrial [OS=Saccharomyces                                      | 856448 | COX6; YHR051    | metabolic process;transport                                                          | membrane;mitochondrion                          | catalytic activity;metal ion                                            | 7.254  | 9      | 1.24 |

|        |                                                                                                                |        |                        |                                                                                                          |                                                        |                                                                                 |        |        |      |
|--------|----------------------------------------------------------------------------------------------------------------|--------|------------------------|----------------------------------------------------------------------------------------------------------|--------------------------------------------------------|---------------------------------------------------------------------------------|--------|--------|------|
|        | cerevisiae S288c]                                                                                              |        | W                      |                                                                                                          |                                                        | binding;transporter activity                                                    |        |        |      |
| P32795 | Mitochondrial inner membrane i-AAA protease supercomplex subunit YME1 [OS=Saccharomyces cerevisiae S288c]      | 85135  | YME1; YPR024 W         | metabolic process;response to stimulus;transport                                                         | membrane;mitochondrion                                 | catalytic activity;metal ion binding;nucleotide binding;protein binding         | 1.798  | 2.241  | 1.25 |
| P47052 | succinate dehydrogenase [ubiquinone] flavoprotein subunit 2, mitochondrial [OS=Saccharomyces cerevisiae S288c] | 853405 | YJL045 W; YJL045 W     | metabolic process;transport                                                                              | membrane;mitochondrion                                 | catalytic activity;nucleotide binding                                           | 4.712  | 5.884  | 1.25 |
| P36521 | 54S ribosomal protein L11, mitochondrial [OS=Saccharomyces cerevisiae S288c]                                   | 851325 | MRPL11 ; YDL202 W      | cell organization and biogenesis;metabolic process                                                       | mitochondrion;ribosome                                 | structural molecule activity                                                    | 1.069  | 1.336  | 1.25 |
| P00927 | Threonine dehydratase, mitochondrial [OS=Saccharomyces cerevisiae S288c]                                       | 856819 | ILV1; YER086 W         | metabolic process                                                                                        | cytoplasm;mitochondrion                                | catalytic activity                                                              | 3.125  | 3.924  | 1.26 |
| P16451 | Pyruvate dehydrogenase complex protein X component, mitochondrial [OS=Saccharomyces cerevisiae S288c]          | 853107 | PDX1; YGR193 C         | metabolic process                                                                                        | mitochondrion;organelle lumen                          | catalytic activity;structural molecule activity                                 | 2.594  | 3.262  | 1.26 |
| P38071 | Enoyl-[acyl-carrier protein] reductase [NADPH, B-specific], mitochondrial [OS=Saccharomyces cerevisiae S288c]  | 852314 | ETR1; YBR026 C         | metabolic process                                                                                        | mitochondrion;organelle lumen                          | catalytic activity;DNA binding;metal ion binding                                | 9      | 11.328 | 1.26 |
| Q05931 | Heat shock protein SSO1, mitochondrial [OS=Saccharomyces cerevisiae S288c]                                     | 851084 | SSO1; YLR369 W         | cell organization and biogenesis;metabolic process                                                       | mitochondrion;organelle lumen                          | nucleotide binding;protein binding                                              | 0.884  | 1.113  | 1.26 |
| P40513 | Mitochondrial acidic protein MAM33 [OS=Saccharomyces cerevisiae S288c]                                         | 854740 | MAM33 ; YIL070C        | metabolic process;regulation of biological process                                                       | mitochondrion;organelle lumen                          | translation regulator activity                                                  | 3.642  | 4.623  | 1.27 |
| P53721 | Respiratory supercomplex factor 2, mitochondrial [OS=Saccharomyces cerevisiae S288c]                           | 855752 | RCF2; YNR018 W         | cell organization and biogenesis                                                                         | membrane;mitochondrion                                 |                                                                                 | 5.579  | 7.111  | 1.27 |
| P33416 | Heat shock protein 78, mitochondrial [OS=Saccharomyces cerevisiae S288c]                                       | 851845 | HSP78; YDR258 C        | cell organization and biogenesis;metabolic process;regulation of biological process;response to stimulus | mitochondrion;organelle lumen                          | catalytic activity;nucleotide binding;protein binding                           | 7.929  | 10.199 | 1.29 |
| Q03640 | Tricalbin-3 [OS=Saccharomyces cerevisiae S288c]                                                                | 854903 | TCB3; YML072 C         | cell organization and biogenesis;regulation of biological process                                        | endoplasmic reticulum;membrane;mitochondrion           | metal ion binding;protein binding                                               | 0.283  | 0.365  | 1.29 |
| P39987 | Heat shock protein SSC3, mitochondrial [OS=Saccharomyces cerevisiae S288c]                                     | 856682 | ECM10; YEL030 W        | cell organization and biogenesis;metabolic process;transport                                             | mitochondrion                                          | nucleotide binding;protein binding                                              | 2.162  | 2.793  | 1.29 |
| P53889 | uncharacterized mitochondrial hydrolase FMP41 [OS=Saccharomyces cerevisiae S288c]                              | 855553 | FMP41; YNL168 C        | metabolic process                                                                                        | mitochondrion                                          | catalytic activity;metal ion binding                                            | 0.968  | 1.254  | 1.30 |
| P50945 | MICOS complex subunit MIC27 [OS=Saccharomyces cerevisiae S288c]                                                | 855623 | AIM37; MIC27; YNL100 W | cell organization and biogenesis                                                                         | membrane;mitochondrion                                 |                                                                                 | 0.968  | 1.254  | 1.30 |
| POCS90 | Heat shock protein SSC1, mitochondrial [OS=Saccharomyces cerevisiae S288c]                                     | 853503 | SSC1; YJR045 C         | cell organization and biogenesis;metabolic process;regulation of biological process;transport            | membrane;mitochondrion;nucleus;organelle lumen         | catalytic activity;enzyme regulator activity;nucleotide binding;protein binding | 48.482 | 62.908 | 1.30 |
| P00128 | Cytochrome b-c1 complex subunit 7 [OS=Saccharomyces cerevisiae S288c]                                          | 852142 | QCR7; YDR529 C         | cell organization and biogenesis;metabolic process;transport                                             | membrane;mitochondrion                                 | catalytic activity;transporter activity                                         | 34.938 | 45.416 | 1.30 |
| Q02204 | 54S ribosomal protein L13, mitochondrial [OS=Saccharomyces cerevisiae S288c]                                   | 853875 | MRPL13 ; YKR006 C      | cell organization and biogenesis;metabolic process                                                       | mitochondrion;ribosome                                 | structural molecule activity                                                    | 1.054  | 1.371  | 1.30 |
| P43616 | Cys-Gly metallopeptidase dug1 [OS=Saccharomyces cerevisiae S288c]                                              | 850605 | DUG1; YFR044 C         | metabolic process                                                                                        | cytoplasm;mitochondrion;ribosome                       | catalytic activity;metal ion binding                                            | 1.154  | 1.512  | 1.31 |
| Q03327 | Mitochondrial fusion and transport protein Ugo1 [OS=Saccharomyces cerevisiae S288c]                            | 852081 | UGO1; YDR470 C         | cell organization and biogenesis;metabolic process                                                       | membrane;mitochondrion                                 | protein binding;structural molecule activity                                    | 0.425  | 0.557  | 1.31 |
| Q03246 | 37S ribosomal protein S17, mitochondrial [OS=Saccharomyces cerevisiae S288c]                                   | 855226 | MRP51 7; YMR18 8C      | cell differentiation;cell organization and biogenesis;metabolic process                                  | mitochondrion;ribosome                                 | RNA binding;structural molecule activity                                        | 1.276  | 1.683  | 1.32 |
| P00424 | Cytochrome c oxidase polypeptide 5A, mitochondrial [OS=Saccharomyces cerevisiae S288c]                         | 855675 | COX5A; YNL052 W        | metabolic process;transport                                                                              | membrane;mitochondrion                                 | catalytic activity;transporter activity                                         | 2.511  | 3.329  | 1.33 |
| P32454 | Aminopeptidase 2, mitochondrial [OS=Saccharomyces cerevisiae S288c]                                            | 853699 | APE2; YKL157 W         | metabolic process                                                                                        | cytoplasm;extracellular;membrane;mitochondrion;nucleus | catalytic activity;metal ion binding                                            | 0.973  | 1.294  | 1.33 |
| P39522 | Dihydroxy-acid dehydratase, mitochondrial [OS=Saccharomyces cerevisiae S288c]                                  | 853473 | ILV3; YJR016 C         | metabolic process                                                                                        | mitochondrion                                          | catalytic activity;metal ion binding                                            | 29.539 | 39.37  | 1.33 |
| P00401 | Cytochrome c oxidase subunit 1 [OS=Saccharomyces cerevisiae S288c]                                             | 854598 | COX1; Q0045            | metabolic process;transport                                                                              | membrane;mitochondrion                                 | catalytic activity;metal ion binding;transporter                                | 1.61   | 2.162  | 1.34 |

|          |                                                                                                            |        |                         |                                                                                   |                                         |                                                                            |        |         |      |
|----------|------------------------------------------------------------------------------------------------------------|--------|-------------------------|-----------------------------------------------------------------------------------|-----------------------------------------|----------------------------------------------------------------------------|--------|---------|------|
|          |                                                                                                            |        |                         |                                                                                   |                                         | r activity                                                                 |        |         |      |
| Q12480   | Probable electron transfer flavoprotein subunit alpha, mitochondrial [OS=Saccharomyces cerevisiae S288c]   | 856112 | AIM45; YPR004C          | metabolic process;transport                                                       | mitochondrion;organelle lumen           | catalytic activity;nucleotide binding                                      | 2.981  | 4.012   | 1.35 |
| P32898   | Mitochondrial presequence protease [OS=Saccharomyces cerevisiae S288c]                                     | 852041 | CYM1; YDR430C           | metabolic process                                                                 | mitochondrion                           | catalytic activity;metal ion binding                                       | 1.349  | 1.829   | 1.36 |
| P16387   | Pyruvate dehydrogenase E1 component subunit alpha, mitochondrial [OS=Saccharomyces cerevisiae S288c]       | 856925 | PDA1; YER178W           | cell growth;metabolic process                                                     | mitochondrion;organelle lumen           | catalytic activity                                                         | 21.638 | 29.47   | 1.36 |
| P00830   | ATP synthase subunit beta, mitochondrial [OS=Saccharomyces cerevisiae S288c]                               | 853585 | ATP2; YJR121W           | metabolic process;transport                                                       | cytosol;membrane;mitochondrion          | catalytic activity;nucleotide binding;protein binding;transporter activity | 78.433 | 106.978 | 1.36 |
| P10507   | mitochondrial-processing peptidase subunit beta [OS=Saccharomyces cerevisiae S288c]                        | 850860 | MAS1; YLR163C           | metabolic process;transport                                                       | mitochondrion;organelle lumen           | catalytic activity;metal ion binding;protein binding                       | 1.371  | 1.873   | 1.37 |
| P00044   | Cytochrome c iso-1 [OS=Saccharomyces cerevisiae S288c]                                                     | 853507 | CYC1; YJR048W           | metabolic process;transport                                                       | mitochondrion                           | metal ion binding;protein binding                                          | 9      | 12.335  | 1.37 |
| P07275   | Delta-1-pyrroline-5-carboxylate dehydrogenase, mitochondrial [OS=Saccharomyces cerevisiae S288c]           | 856432 | PUT2; YHR037W           | metabolic process                                                                 | membrane;mitochondrion;organelle lumen  | catalytic activity                                                         | 6.055  | 8.326   | 1.38 |
| P35180   | mitochondrial import receptor subunit Tom20 [OS=Saccharomyces cerevisiae S288c]                            | 852973 | TOM20; YGR082W          | cell organization and biogenesis;transport                                        | membrane;mitochondrion                  | protein binding;transporter activity                                       | 1.031  | 1.424   | 1.38 |
| P38705   | Serine--tRNA ligase, mitochondrial [OS=Saccharomyces cerevisiae S288c]                                     | 856402 | DIA4; YHR011W           | metabolic process                                                                 | cytoplasm;mitochondrion;organelle lumen | catalytic activity;nucleotide binding                                      | 0.233  | 0.322   | 1.38 |
| P07236   | Threonine--tRNA ligase, mitochondrial [OS=Saccharomyces cerevisiae S288c]                                  | 853640 | MST1; YKL194C           | metabolic process                                                                 | cytoplasm;mitochondrion;organelle lumen | catalytic activity;nucleotide binding;RNA binding                          | 0.233  | 0.322   | 1.38 |
| P20967   | 2-oxoglutarate dehydrogenase, mitochondrial [OS=Saccharomyces cerevisiae S288c]                            | 854681 | KGD1; YIL125W           | metabolic process                                                                 | cytosol;mitochondrion;organelle lumen   | catalytic activity                                                         | 11.426 | 15.843  | 1.39 |
| Q04728   | Arginine biosynthesis bifunctional protein ArgJ, mitochondrial [OS=Saccharomyces cerevisiae S288c]         | 855084 | ARG7; YMR062C           | metabolic process                                                                 | mitochondrion;organelle lumen           | catalytic activity                                                         | 0.63   | 0.874   | 1.39 |
| P03879   | Intron-encoded RNA maturase b14 [OS=Saccharomyces cerevisiae S288c]                                        | 854582 | BI4; Q0120              | metabolic process                                                                 | membrane;mitochondrion                  | catalytic activity;RNA binding                                             | 0.28   | 0.389   | 1.39 |
| P17505   | Malate dehydrogenase, mitochondrial [OS=Saccharomyces cerevisiae S288c]                                    | 853777 | MDH1; YKL085W           | metabolic process                                                                 | mitochondrion;organelle lumen           | catalytic activity;protein binding;RNA binding                             | 56.797 | 79.309  | 1.40 |
| P07266   | Mitochondrial RNA-splicing protein MRS1 [OS=Saccharomyces cerevisiae S288c]                                | 854839 | MRS1; YIR021W           | cell organization and biogenesis;metabolic process                                | mitochondrion;organelle lumen           | catalytic activity;DNA binding;RNA binding                                 | 0.304  | 0.425   | 1.40 |
| Q00055   | Glycerol-3-phosphate dehydrogenase [NAD(+)] 1 [OS=Saccharomyces cerevisiae S288c]                          | 851539 | GPD1; YDL022W           | cell organization and biogenesis;cellular homeostasis;metabolic process;transport | cytoplasm;cytosol;mitochondrion;nucleus | catalytic activity;nucleotide binding;protein binding                      | 0.318  | 0.445   | 1.40 |
| P22135   | Protein ATP12, mitochondrial [OS=Saccharomyces cerevisiae S288c]                                           | 853259 | ATP12; YJL180C          | cell organization and biogenesis                                                  | mitochondrion                           | protein binding                                                            | 0.334  | 0.468   | 1.40 |
| Q05648   | MIOREX complex component 10 [OS=Saccharomyces cerevisiae S288c]                                            | 851876 | YDR282C; MRX10; YDR282C |                                                                                   | membrane;mitochondrion                  |                                                                            | 0.35   | 0.492   | 1.41 |
| P38088   | Glycine--tRNA ligase 1, mitochondrial [OS=Saccharomyces cerevisiae S288c]                                  |        |                         | metabolic process                                                                 | cytoplasm;mitochondrion;organelle lumen | catalytic activity;nucleotide binding;protein binding                      | 0.616  | 0.866   | 1.41 |
| P53170   | [Pyruvate dehydrogenase (acetyl-transferring)] kinase 2, mitochondrial [OS=Saccharomyces cerevisiae S288c] | 852821 | PKP2; YGL059W           | metabolic process;regulation of biological process                                | mitochondrion;organelle lumen           | catalytic activity;nucleotide binding;protein binding                      | 0.778  | 1.096   | 1.41 |
| P06208-1 | 2-isopropylmalate synthase [OS=Saccharomyces cerevisiae S288c]                                             | 855619 | LEU4; YNL104C           | metabolic process                                                                 | cytoplasm;mitochondrion                 | catalytic activity;protein binding                                         | 5.236  | 7.377   | 1.41 |
| Q06892   | NADH kinase POS5, mitochondrial [OS=Saccharomyces cerevisiae S288c]                                        | 855913 | POS5; YPL188W           | metabolic process;response to stimulus                                            | mitochondrion;organelle lumen           | catalytic activity;nucleotide binding                                      | 1.31   | 1.848   | 1.41 |
| P40452   | Cytochrome c oxidase assembly factor 1 [OS=Saccharomyces cerevisiae S288c]                                 | 854649 | COA1; YJL157C           | cell organization and biogenesis                                                  | membrane;mitochondrion                  | protein binding                                                            | 1.31   | 1.848   | 1.41 |
| P40495   | Homoisocitrate dehydrogenase, mitochondrial [OS=Saccharomyces cerevisiae S288c]                            | 854714 | LYS12; YJL094C          | metabolic process                                                                 | mitochondrion                           | catalytic activity;metal ion binding;nucleotide binding                    | 4.109  | 5.813   | 1.41 |

|        |                                                                                                              |            |                                       |                                                                                                                               |                                         |                                                              |            |            |      |
|--------|--------------------------------------------------------------------------------------------------------------|------------|---------------------------------------|-------------------------------------------------------------------------------------------------------------------------------|-----------------------------------------|--------------------------------------------------------------|------------|------------|------|
| P38122 | 3-methyl-2-oxobutanoate hydroxymethyltransferase [OS=Saccharomyces cerevisiae S288c]                         | 85247<br>4 | ECM31;<br>YBR176<br>W                 | metabolic process                                                                                                             | mitochondrion                           | catalytic activity                                           | 0.413      | 0.585      | 1.42 |
| Q03976 | 37S ribosomal protein S24, mitochondrial [OS=Saccharomyces cerevisiae S288c]                                 | 85175<br>5 | RSM24;<br>YDR175<br>C                 | cell organization and biogenesis;metabolic process                                                                            | mitochondrion;ribosome                  | structural molecule activity                                 | 0.905      | 1.291      | 1.43 |
| Q08245 | protein ZEO1 [OS=Saccharomyces cerevisiae S288c]                                                             | 85404<br>0 | ZEO1;<br>YOL109<br>W                  | cell organization and biogenesis                                                                                              | membrane;mitochondrion                  | protein binding                                              | 1.512      | 2.162      | 1.43 |
| Q00711 | Succinate dehydrogenase [ubiquinone] flavoprotein subunit, mitochondrial [OS=Saccharomyces cerevisiae S288c] | 85370<br>9 | SDH1;<br>YKL148<br>C                  | metabolic process;transport                                                                                                   | membrane;mitochondrion                  | catalytic activity;nucleotide binding;protein binding        | 12.24<br>2 | 17.54<br>8 | 1.43 |
| P38323 | ATP-dependent clpX-like chaperone, mitochondrial [OS=Saccharomyces cerevisiae S288c]                         | 85252<br>8 | MCX1;<br>YBR227<br>C                  | metabolic process                                                                                                             | membrane;mitochondrion;organelle lumen  | catalytic activity;nucleotide binding                        | 0.501      | 0.719      | 1.44 |
| Q05892 | MIOREX complex component 2 [OS=Saccharomyces cerevisiae S288c]                                               | 85099<br>7 | YLR290<br>C;<br>COQ11;<br>YLR290<br>C | metabolic process                                                                                                             | mitochondrion                           | catalytic activity                                           | 3.217      | 4.623      | 1.44 |
| P38910 | 10 kDa heat shock protein, mitochondrial [OS=Saccharomyces cerevisiae S288c]                                 | 85418<br>5 | HSP10;<br>YOR020<br>C                 | cell organization and biogenesis;metabolic process;response to stimulus;transport                                             | cytoplasm;mitochondrion;organelle lumen | metal ion binding;nucleotide binding;protein binding         | 3.217      | 4.623      | 1.44 |
| Q01852 | Mitochondrial import inner membrane translocase subunit TIM44 [OS=Saccharomyces cerevisiae S288c]            | 85479<br>0 | TIM44;<br>YIL022<br>W                 | transport                                                                                                                     | membrane;mitochondrion                  | nucleotide binding;protein binding                           | 3.758      | 5.404      | 1.44 |
| P32316 | acetyl-CoA hydrolase [OS=Saccharomyces cerevisiae S288c]                                                     | 85226<br>6 | ACH1;<br>YBL015<br>W                  | metabolic process                                                                                                             | cytoplasm;cytosol;mitochondrion         | catalytic activity                                           | 15.29<br>8 | 22.10<br>1 | 1.44 |
| Q02784 | Monothiol glutaredoxin-5, mitochondrial [OS=Saccharomyces cerevisiae S288c]                                  | 85604<br>8 | GRX5;<br>YPL059<br>W                  | cell organization and biogenesis;cellular homeostasis;metabolic process;regulation of biological process;response to stimulus | mitochondrion;organelle lumen           | catalytic activity;metal ion binding                         | 1.783      | 2.594      | 1.45 |
| P38341 | MICOS complex subunit MIC12 [OS=Saccharomyces cerevisiae S288c]                                              | 85256<br>6 | AIM5;<br>MIC12;<br>YBR262<br>C        | cell organization and biogenesis                                                                                              | membrane;mitochondrion                  |                                                              | 1.783      | 2.594      | 1.45 |
| P35996 | 54S ribosomal protein L38, mitochondrial [OS=Saccharomyces cerevisiae S288c]                                 | 85368<br>4 | MRPL38<br>;<br>YKL170<br>W            | cell organization and biogenesis;metabolic process                                                                            | mitochondrion;ribosome                  | RNA binding;structural molecule activity                     | 1.783      | 2.594      | 1.45 |
| Q6Q560 | Protein isd11 [OS=Saccharomyces cerevisiae S288c]                                                            | 85677<br>4 | ISD11;<br>YER048<br>W-A               | cell organization and biogenesis;metabolic process                                                                            | mitochondrion;organelle lumen           | catalytic activity;protein binding                           | 1.783      | 2.594      | 1.45 |
| P37292 | Serine hydroxymethyltransferase, mitochondrial [OS=Saccharomyces cerevisiae S288c]                           | 85256<br>5 | SHM1;<br>YBR263<br>W                  | metabolic process                                                                                                             | mitochondrion                           | catalytic activity                                           | 9          | 13.17<br>5 | 1.46 |
| Q03201 | 37S ribosomal protein S10, mitochondrial [OS=Saccharomyces cerevisiae S288c]                                 | 85161<br>1 | RSM10;<br>YDR041<br>W                 | cell organization and biogenesis;metabolic process                                                                            | mitochondrion;ribosome                  | structural molecule activity                                 | 0.701      | 1.031      | 1.47 |
| P52893 | probable alanine aminotransferase, mitochondrial [OS=Saccharomyces cerevisiae S288c]                         | 85077<br>8 | ALT1;<br>YLR089<br>C                  | metabolic process                                                                                                             | mitochondrion;organelle lumen           | catalytic activity                                           | 1.102      | 1.626      | 1.48 |
| P53598 | Succinyl-CoA ligase [ADP-forming] subunit alpha, mitochondrial [OS=Saccharomyces cerevisiae S288c]           | 85431<br>0 | LSC1;<br>YOR142<br>W                  | metabolic process                                                                                                             | cytosol;mitochondrion                   | catalytic activity;nucleotide binding                        | 11.74<br>3 | 17.33      | 1.48 |
| P22136 | ATPase expression protein 2, mitochondrial [OS=Saccharomyces cerevisiae S288c]                               | 85532<br>5 | AEP2;<br>YMR28<br>2C                  | metabolic process;regulation of biological process                                                                            | mitochondrion                           | RNA binding                                                  | 0.292      | 0.431      | 1.48 |
| P38523 | GrpE protein homolog, mitochondrial [OS=Saccharomyces cerevisiae S288c]                                      | 85440<br>7 | MGE1;<br>YOR232<br>W                  | metabolic process;regulation of biological process;transport                                                                  | membrane;mitochondrion;organelle lumen  | enzyme regulator activity;nucleotide binding;protein binding | 1.336      | 1.976      | 1.48 |
| Q08230 | Succinate dehydrogenase assembly factor 2, mitochondrial [OS=Saccharomyces cerevisiae S288c]                 | 85408<br>3 | EM15;<br>SDH5;<br>YOL071<br>W         | cell differentiation;cell organization and biogenesis;metabolic process;regulation of biological process                      | mitochondrion;organelle lumen           | protein binding                                              | 0.778      | 1.154      | 1.48 |
| P09440 | C-1-tetrahydrofolate synthase, mitochondrial [OS=Saccharomyces cerevisiae S288c]                             | 85237<br>8 | MIS1;<br>YBR084<br>W                  | metabolic process                                                                                                             | cytosol;mitochondrion                   | catalytic activity;nucleotide binding                        | 1.049      | 1.569      | 1.50 |
| P40053 | Altered inheritance of mitochondria protein 9, mitochondrial [OS=Saccharomyces cerevisiae S288c]             | 85681<br>3 | AIM9;<br>YER080<br>W                  |                                                                                                                               | mitochondrion                           |                                                              | 4.555      | 6.827      | 1.50 |
| P47127 | Altered inheritance of mitochondria protein 24, mitochondrial [OS=Saccharomyces cerevisiae S288c]            | 85354<br>3 | AIM24;<br>YJR080<br>C                 | cell organization and biogenesis                                                                                              | mitochondrion                           |                                                              | 2.857      | 4.298      | 1.50 |
| P25349 | Flavoprotein-like protein YCP4 [OS=Saccharomyces cerevisiae S288c]                                           | 85036<br>0 | YCP4;<br>YCR004<br>C                  | metabolic process;regulation of biological process                                                                            | cytoplasm;membrane;mitochondrion        | catalytic activity;nucleotide binding;protein binding        | 9          | 13.67<br>8 | 1.52 |



|        |                                                                                                                                                     |        |                      |                                                                                              |                                               |                                                                     |        |        |      |
|--------|-----------------------------------------------------------------------------------------------------------------------------------------------------|--------|----------------------|----------------------------------------------------------------------------------------------|-----------------------------------------------|---------------------------------------------------------------------|--------|--------|------|
| P36046 | Mitochondrial intermembrane space import and assembly protein 40 [OS=Saccharomyces cerevisiae S288c]                                                | 85369  | MIA40; YKL195W       | cellular component movement;metabolic process;response to stimulus;transport                 | membrane;mitochondrion                        | catalytic activity;protein binding;transporter activity             | 3.262  | 4.995  | 1.53 |
| P19516 | Cytochrome c oxidase assembly protein COX11, mitochondrial [OS=Saccharomyces cerevisiae S288c]                                                      | 855971 | COX11; YPL132W       | cell organization and biogenesis;metabolic process                                           | membrane;mitochondrion;ribosome               | metal ion binding                                                   | 1.069  | 1.637  | 1.53 |
| P36112 | MICOS complex subunit Mic60 [OS=Saccharomyces cerevisiae S288c]                                                                                     | 853886 | FCJ1; MIC60; YKR016W | cell organization and biogenesis;transport                                                   | membrane;mitochondrion                        |                                                                     | 15.379 | 23.709 | 1.54 |
| P04819 | DNA ligase 1 [OS=Saccharomyces cerevisiae S288c]                                                                                                    | 851391 | CDC9; YDL164C        | cell division;cell organization and biogenesis;metabolic process;response to stimulus        | cytoplasm;mitochondrion;nucleus               | catalytic activity;DNA binding;metal ion binding;nucleotide binding | 0.11   | 0.17   | 1.55 |
| P32493 | ATPase expression protein 1, mitochondrial [OS=Saccharomyces cerevisiae S288c]                                                                      | 855086 | AEP1; YMR064W        | regulation of biological process                                                             | mitochondrion                                 | translation regulator activity                                      | 0.15   | 0.233  | 1.55 |
| P07806 | Valine--tRNA ligase, mitochondrial [OS=Saccharomyces cerevisiae S288c]                                                                              | 852986 | VAS1; YGR094W        | metabolic process;regulation of biological process                                           | cytoplasm;cytosol;mitochondrion               | catalytic activity;nucleotide binding                               | 0.616  | 0.957  | 1.55 |
| P41921 | glutathione reductase [OS=Saccharomyces cerevisiae S288c]                                                                                           | 856014 | GLR1; YPL091W        | cellular homeostasis;metabolic process;regulation of biological process;response to stimulus | cytoplasm;cytosol;mitochondrion;nucleus       | antioxidant activity;catalytic activity;nucleotide binding          | 0.155  | 0.241  | 1.55 |
| P25345 | Asparagine--tRNA ligase, mitochondrial [OS=Saccharomyces cerevisiae S288c]                                                                          | 850388 | SLM5; YCR024C        | metabolic process                                                                            | cytoplasm;mitochondrion;organelle lumen       | catalytic activity;nucleotide binding                               | 0.172  | 0.269  | 1.56 |
| P00890 | citrate synthase, mitochondrial [OS=Saccharomyces cerevisiae S288c]                                                                                 | 855732 | CIT1; YNR001C        | metabolic process;transport                                                                  | cytosol;mitochondrion;organelle lumen         | catalytic activity                                                  | 9      | 14.086 | 1.57 |
| P19262 | Dihydropolyllysine-residue succinyltransferase component of 2-oxoglutarate dehydrogenase complex, mitochondrial [OS=Saccharomyces cerevisiae S288c] | 851726 | KGD2; YDR148C        | cell organization and biogenesis;metabolic process                                           | mitochondrion                                 | catalytic activity;protein binding                                  | 6.406  | 10.053 | 1.57 |
| P32904 | 54S ribosomal protein L6, mitochondrial [OS=Saccharomyces cerevisiae S288c]                                                                         | 856552 | MRPL6; YHR147C       | cell organization and biogenesis;metabolic process                                           | mitochondrion;ribosome                        | RNA binding;structural molecule activity                            | 1.371  | 2.162  | 1.58 |
| P36147 | Presequence translocated-associated motor subunit pam17, mitochondrial [OS=Saccharomyces cerevisiae S288c]                                          | 853939 | PAM17; YKR065C       | transport                                                                                    | membrane;mitochondrion                        |                                                                     | 1.371  | 2.162  | 1.58 |
| P53736 | Uncharacterized protein YNR040W [OS=Saccharomyces cerevisiae S288c]                                                                                 | 855776 | YNR040W; YNR040W     |                                                                                              | mitochondrion                                 |                                                                     | 0.73   | 1.154  | 1.58 |
| Q12251 | Uncharacterized mitochondrial carrier YPR011C [OS=Saccharomyces cerevisiae S288c]                                                                   | 856121 | YPR011C; YPR011C     | metabolic process;transport                                                                  | membrane;mitochondrion                        | structural molecule activity;transporter activity                   | 0.245  | 0.389  | 1.59 |
| P49017 | 2-methoxy-6-polyprenyl-1,4-benzoquinol methylase, mitochondrial [OS=Saccharomyces cerevisiae S288c]                                                 | 854930 | COQ5; YML110C        | metabolic process                                                                            | membrane;mitochondrion;organelle lumen        | catalytic activity                                                  | 0.245  | 0.389  | 1.59 |
| Q01519 | Cytochrome c oxidase subunit 6b [OS=Saccharomyces cerevisiae S288c]                                                                                 | 850727 | COX12; YLR038C       | cell organization and biogenesis;metabolic process;transport                                 | mitochondrion                                 | catalytic activity;transporter activity                             | 3.642  | 5.813  | 1.60 |
| P36525 | 54S ribosomal protein L24, mitochondrial [OS=Saccharomyces cerevisiae S288c]                                                                        | 855231 | MRPL24; YMR193W      | cell organization and biogenesis;metabolic process                                           | mitochondrion;ribosome                        | RNA binding;structural molecule activity                            | 1.512  | 2.415  | 1.60 |
| P36519 | 54S ribosomal protein L7, mitochondrial [OS=Saccharomyces cerevisiae S288c]                                                                         | 851823 | MRPL7; YDR237W       | cell organization and biogenesis;metabolic process                                           | mitochondrion;ribosome                        | RNA binding;structural molecule activity                            | 0.292  | 0.468  | 1.60 |
| P04803 | Tryptophan--tRNA ligase, mitochondrial [OS=Saccharomyces cerevisiae S288c]                                                                          | 851861 | MSW1; YDR268W        | metabolic process                                                                            | cytoplasm;mitochondrion;organelle lumen       | catalytic activity;nucleotide binding                               | 0.292  | 0.468  | 1.60 |
| P28625 | Protein YIM1 [OS=Saccharomyces cerevisiae S288c]                                                                                                    | 855183 | YIM1; YMR152W        | metabolic process;response to stimulus                                                       | cytoplasm;endoplasmic reticulum;mitochondrion | catalytic activity;metal ion binding                                | 0.833  | 1.336  | 1.60 |
| P47045 | mitochondrial import inner membrane translocase subunit TIM54 [OS=Saccharomyces cerevisiae S288c]                                                   | 853392 | TIM54; YJL054W       | cell organization and biogenesis;transport                                                   | cytosol;membrane;mitochondrion                | transporter activity                                                | 0.655  | 1.054  | 1.61 |
| P31334 | 54S ribosomal protein L9, mitochondrial [OS=Saccharomyces cerevisiae S288c]                                                                         | 853135 | MRPL9; YGR220C       | cell organization and biogenesis;metabolic process                                           | mitochondrion;ribosome                        | structural molecule activity                                        | 0.311  | 0.501  | 1.61 |
| P36523 | 54S ribosomal protein L15, mitochondrial [OS=Saccharomyces cerevisiae S288c]                                                                        | 851022 | MRPL15; YLR312W-A    | cell organization and biogenesis;metabolic process                                           | mitochondrion;ribosome                        | catalytic activity;RNA binding;structural molecule activity         | 0.334  | 0.54   | 1.62 |
| Q02608 | 37S ribosomal protein S16, mitochondrial [OS=Saccharomyces cerevisiae S288c]                                                                        | 856094 | MRP516; YPL013C      | cell organization and biogenesis;metabolic process                                           | mitochondrion;ribosome                        | structural molecule activity                                        | 1.683  | 2.728  | 1.62 |

|        |                                                                                                   |        |                 |                                                                                                          |                                              |                                                             |       |        |      |
|--------|---------------------------------------------------------------------------------------------------|--------|-----------------|----------------------------------------------------------------------------------------------------------|----------------------------------------------|-------------------------------------------------------------|-------|--------|------|
| Q12029 | Probable mitochondrial transport protein fsf1 [OS=Saccharomyces cerevisiae S288c]                 | 854445 | FSF1; YOR271C   | transport                                                                                                | membrane;mitochondrion                       | transporter activity                                        | 2.36  | 3.833  | 1.62 |
| Q06630 | Mitochondrial homologous recombination protein 1 [OS=Saccharomyces cerevisiae S288c]              | 851890 | MHR1; YDR296W   | cell organization and biogenesis;metabolic process;regulation of biological process;response to stimulus | mitochondrion;nucleus                        | catalytic activity;DNA binding;structural molecule activity | 0.359 | 0.585  | 1.63 |
| P15179 | Aspartate-tRNA ligase, mitochondrial [OS=Saccharomyces cerevisiae S288c]                          | 856000 | MSD1; YPL104W   | metabolic process                                                                                        | cytoplasm;mitochondrion;organelle lumen      | catalytic activity;nucleotide binding                       | 0.379 | 0.619  | 1.63 |
| P32839 | Mitochondrial chaperone BCS1 [OS=Saccharomyces cerevisiae S288c]                                  | 851981 | BCS1; YDR375C   | cell organization and biogenesis;metabolic process;response to stimulus;transport                        | cytosol;membrane;mitochondrion               | catalytic activity;nucleotide binding;transporter activity  | 0.425 | 0.701  | 1.65 |
| P34222 | Peptidyl-tRNA hydrolase 2 [OS=Saccharomyces cerevisiae S288c]                                     | 852223 | PTH2; YBL057C   | regulation of biological process                                                                         | cytoplasm;cytosol;membrane;mitochondrion     | catalytic activity;protein binding                          | 0.425 | 0.701  | 1.65 |
| Q04487 | Mitochondrial inner membrane protein SHH3 [OS=Saccharomyces cerevisiae S288c]                     | 855145 | SHH3; YMR118C   | metabolic process                                                                                        | membrane;mitochondrion                       | catalytic activity;metal ion binding                        | 0.425 | 0.701  | 1.65 |
| P47039 | Probable kynurenine-oxoglutarate transaminase BNA3 [OS=Saccharomyces cerevisiae S288c]            | 853386 | BNA3; YJL060W   | metabolic process;regulation of biological process                                                       | cytoplasm;mitochondrion                      | catalytic activity                                          | 0.468 | 0.778  | 1.66 |
| P40858 | 54S ribosomal protein L49, mitochondrial [OS=Saccharomyces cerevisiae S288c]                      | 853349 | MRPL49; YJL096W | cell organization and biogenesis;metabolic process                                                       | mitochondrion;ribosome                       | RNA binding;structural molecule activity                    | 0.468 | 0.778  | 1.66 |
| P40515 | Mitochondria fission 1 protein [OS=Saccharomyces cerevisiae S288c]                                | 854745 | FIS1; YJL065C   | cell death;cell organization and biogenesis;regulation of biological process                             | membrane;mitochondrion                       | protein binding                                             | 0.468 | 0.778  | 1.66 |
| Q03020 | iron sulfur cluster assembly protein 1, mitochondrial [OS=Saccharomyces cerevisiae S288c]         | 855968 | ISU1; YPL135W   | cell organization and biogenesis;cellular homeostasis;metabolic process                                  | cytoplasm;mitochondrion;organelle lumen      | catalytic activity;metal ion binding;protein binding        | 0.468 | 0.778  | 1.66 |
| P53193 | J-type co-chaperone JAC1, mitochondrial [OS=Saccharomyces cerevisiae S288c]                       | 852866 | JAC1; YGL018C   | cell organization and biogenesis;metabolic process;transport                                             | membrane;mitochondrion;organelle lumen       | protein binding                                             | 0.468 | 0.778  | 1.66 |
| P36528 | 54S ribosomal protein L17, mitochondrial [OS=Saccharomyces cerevisiae S288c]                      | 855469 | MRPL17; YNL252C | cell organization and biogenesis;metabolic process                                                       | mitochondrion;ribosome                       | structural molecule activity                                | 0.52  | 0.874  | 1.68 |
| P53305 | Mitochondrial 37S ribosomal protein S27 [OS=Saccharomyces cerevisiae S288c]                       | 853129 | RSM27; YGR215W  | cell organization and biogenesis;metabolic process                                                       | mitochondrion;ribosome                       | structural molecule activity                                | 2.162 | 3.642  | 1.68 |
| P20084 | 54S ribosomal protein L33, mitochondrial [OS=Saccharomyces cerevisiae S288c]                      | 855330 | MRPL33; YMR286W | cell organization and biogenesis;metabolic process                                                       | mitochondrion;ribosome                       | structural molecule activity                                | 2.162 | 3.642  | 1.68 |
| P22354 | 54S ribosomal protein L20, mitochondrial [OS=Saccharomyces cerevisiae S288c]                      | 853960 | MRPL20; YKR085C | cell organization and biogenesis;metabolic process                                                       | mitochondrion;ribosome                       | structural molecule activity                                | 1.276 | 2.162  | 1.69 |
| P40185 | Protein mmf1, mitochondrial [OS=Saccharomyces cerevisiae S288c]                                   | 854760 | MMF1; YJL051C   | cell organization and biogenesis;metabolic process                                                       | mitochondrion;organelle lumen                |                                                             | 5.31  | 9      | 1.69 |
| P36526 | 54S ribosomal protein L27, mitochondrial [OS=Saccharomyces cerevisiae S288c]                      | 852585 | MRPL27; YBR282W | cell organization and biogenesis;metabolic process                                                       | mitochondrion;ribosome                       | structural molecule activity                                | 0.585 | 0.995  | 1.70 |
| P40033 | 37S ribosomal protein rsm18, mitochondrial [OS=Saccharomyces cerevisiae S288c]                    | 856776 | RSM18; YER050C  | cell organization and biogenesis;metabolic process                                                       | mitochondrion;ribosome                       | structural molecule activity                                | 0.585 | 0.995  | 1.70 |
| Q06493 | LETM1 domain-containing protein YLH47, mitochondrial [OS=Saccharomyces cerevisiae S288c]          | 856243 | YLH47; YPR125W  | cell organization and biogenesis;transport                                                               | membrane;mitochondrion                       |                                                             | 0.61  | 1.043  | 1.71 |
| P40961 | prohibitin-1 [OS=Saccharomyces cerevisiae S288c]                                                  | 853033 | PHB1; YGR132C   | cell organization and biogenesis;metabolic process;regulation of biological process                      | membrane;mitochondrion                       | protein binding                                             | 6.848 | 11.743 | 1.71 |
| Q12305 | Thiosulfate sulfurtransferase RDL1, mitochondrial [OS=Saccharomyces cerevisiae S288c]             | 854459 | RDL1; YOR285W   |                                                                                                          | endoplasmic reticulum;membrane;mitochondrion | catalytic activity                                          | 0.668 | 1.154  | 1.73 |
| P53220 | Mitochondrial import inner membrane translocase subunit TIM21 [OS=Saccharomyces cerevisiae S288c] | 852921 | TIM21; YGR033C  | cell organization and biogenesis;transport                                                               | membrane;mitochondrion                       | protein binding                                             | 0.719 | 1.254  | 1.74 |
| P34227 | Mitochondrial peroxiredoxin PRX1 [OS=Saccharomyces cerevisiae S288c]                              | 852215 | PRX1; YBL064C   | cellular homeostasis;metabolic process;regulation of biological process;response to stimulus             | mitochondrion                                | antioxidant activity;catalytic activity                     | 5.158 | 9      | 1.74 |
| P07342 | Acetolactate synthase catalytic subunit, mitochondrial [OS=Saccharomyces cerevisiae S288c]        | 855135 | ILV2; YMR108W   | metabolic process                                                                                        | mitochondrion                                | catalytic activity;metal ion binding;nucleotide binding     | 4.223 | 7.377  | 1.75 |
| P42900 | Sigma-like sequence protein 1, mitochondrial [OS=Saccharomyces cerevisiae S288c]                  | 850830 | SLS1; YLR139C   | cell organization and biogenesis;metabolic process                                                       | membrane;mitochondrion                       | protein binding                                             | 0.194 | 0.343  | 1.77 |
| P11914 | Mitochondrial-processing peptidase subunit alpha [OS=Saccharomyces                                | 856419 | MAS2; YHR024    | metabolic process;transport                                                                              | membrane;mitochondrion;organelle lumen       | catalytic activity;metal ion                                | 1.291 | 2.311  | 1.79 |

|          |                                                                                                                    |        |                  |                                                                                                          |                                                 |                                                                                |        |        |      |
|----------|--------------------------------------------------------------------------------------------------------------------|--------|------------------|----------------------------------------------------------------------------------------------------------|-------------------------------------------------|--------------------------------------------------------------------------------|--------|--------|------|
|          | cerevisiae S288c]                                                                                                  |        | C                |                                                                                                          |                                                 | binding;protein binding                                                        |        |        |      |
| P17558   | 37S ribosomal protein PET123, mitochondrial [OS=Saccharomyces cerevisiae S288c]                                    | 854329 | PET123; YOR158W  | cell organization and biogenesis;metabolic process                                                       | mitochondrion;ribosome                          | structural molecule activity                                                   | 1.448  | 2.594  | 1.79 |
| P18900   | hexaprenyl pyrophosphate synthase, mitochondrial [OS=Saccharomyces cerevisiae S288c]                               | 852288 | COQ1; YBR003W    | metabolic process                                                                                        | membrane;mitochondrion                          | catalytic activity;metal ion binding;protein binding                           | 0.468  | 0.848  | 1.81 |
| P09950   | 5-aminolevulinatase synthase, mitochondrial [OS=Saccharomyces cerevisiae S288c]                                    | 851818 | HEM1; YDR232W    | metabolic process                                                                                        | mitochondrion;organelle lumen                   | catalytic activity                                                             | 0.28   | 0.509  | 1.82 |
| Q01532-1 | Cysteine proteinase 1, mitochondrial [OS=Saccharomyces cerevisiae S288c]                                           |        | MCY1             | metabolic process;regulation of biological process;response to stimulus                                  | cytoplasm;mitochondrion                         | catalytic activity;DNA binding;RNA binding                                     | 0.28   | 0.509  | 1.82 |
| P46367   | Potassium-activated aldehyde dehydrogenase, mitochondrial [OS=Saccharomyces cerevisiae S288c]                      | 854556 | ALD4; YOR374W    | metabolic process                                                                                        | mitochondrion;organelle lumen                   | catalytic activity                                                             | 47.497 | 86.671 | 1.82 |
| P35191   | DnaJ homolog 1, mitochondrial [OS=Saccharomyces cerevisiae S288c]                                                  | 850530 | MDJ1; YFL016C    | cell organization and biogenesis;metabolic process;regulation of biological process;response to stimulus | mitochondrion;organelle lumen                   | enzyme regulator activity;metal ion binding;nucleotide binding;protein binding | 3.037  | 5.579  | 1.84 |
| Q04599   | 54S ribosomal protein L1, mitochondrial [OS=Saccharomyces cerevisiae S288c]                                        | 851694 | MRPL1; YDR116C   | cell organization and biogenesis;metabolic process                                                       | mitochondrion;ribosome                          | RNA binding;structural molecule activity                                       | 1.069  | 1.976  | 1.85 |
| P37298   | Succinate dehydrogenase [ubiquinone] cytochrome b small subunit, mitochondrial [OS=Saccharomyces cerevisiae S288c] | 851758 | SDH4; YDR178W    | metabolic process;transport                                                                              | membrane;mitochondrion                          | catalytic activity;metal ion binding                                           | 3.642  | 6.743  | 1.85 |
| Q12320   | Hydroxyacylglutathione hydrolase, mitochondrial [OS=Saccharomyces cerevisiae S288c]                                | 854205 | GLO4; YOR040W    | metabolic process                                                                                        | mitochondrion;organelle lumen                   | catalytic activity;metal ion binding                                           | 0.369  | 0.688  | 1.86 |
| P32902   | 37S ribosomal protein MRP4, mitochondrial [OS=Saccharomyces cerevisiae S288c]                                      | 856384 | MRP4; YHL004W    | cell organization and biogenesis;metabolic process                                                       | mitochondrion;ribosome                          | structural molecule activity                                                   | 0.616  | 1.154  | 1.87 |
| P00425   | Cytochrome c oxidase polypeptide 5B, mitochondrial [OS=Saccharomyces cerevisiae S288c]                             | 854695 | COX5B; YIL111W   | metabolic process;transport                                                                              | membrane;mitochondrion                          | catalytic activity;transporter activity                                        | 1.31   | 2.511  | 1.92 |
| P19414   | Aconitate hydratase, mitochondrial [OS=Saccharomyces cerevisiae S288c]                                             | 851013 | ACO1; YLR304C    | cell organization and biogenesis;metabolic process;transport                                             | cytoplasm;cytosol;mitochondrion;organelle lumen | catalytic activity;DNA binding;metal ion binding                               | 48.619 | 94.118 | 1.94 |
| P36534   | 54S ribosomal protein L40, mitochondrial [OS=Saccharomyces cerevisiae S288c]                                       | 855930 | MRPL40; YPL173W  | cell organization and biogenesis;metabolic process                                                       | mitochondrion;ribosome                          | protein binding;structural molecule activity                                   | 0.778  | 1.512  | 1.94 |
| P25605   | Acetolactate synthase small subunit, mitochondrial [OS=Saccharomyces cerevisiae S288c]                             | 850348 | ILV6; YCL009C    | metabolic process;regulation of biological process                                                       | mitochondrion                                   | catalytic activity;enzyme regulator activity                                   | 6.848  | 13.384 | 1.95 |
| P36151   | Uncharacterized protein YKR070W [OS=Saccharomyces cerevisiae S288c]                                                | 853944 | YKR070W; YKR070W | metabolic process                                                                                        | mitochondrion                                   |                                                                                | 0.833  | 1.637  | 1.97 |
| P40364   | Mitochondrial peculiar membrane protein 1 [OS=Saccharomyces cerevisiae S288c]                                      | 853379 | MPM1; YIL066C    |                                                                                                          | membrane;mitochondrion                          |                                                                                | 1.512  | 2.981  | 1.97 |
| P33303   | Succinate/fumarate mitochondrial transporter [OS=Saccharomyces cerevisiae S288c]                                   | 853558 | SFC1; YJR095W    | metabolic process;transport                                                                              | membrane;mitochondrion                          | structural molecule activity;transporter activity                              | 9      | 17.957 | 2.00 |
| P32611   | 54S ribosomal protein RML2, mitochondrial [OS=Saccharomyces cerevisiae S288c]                                      | 856660 | RML2; YEL050C    | cell organization and biogenesis;metabolic process                                                       | mitochondrion;ribosome                          | catalytic activity;RNA binding;structural molecule activity                    | 0.638  | 1.276  | 2.00 |
| P09624   | Dihydropyridin dehydrogenase, mitochondrial [OS=Saccharomyces cerevisiae S288c]                                    | 850527 | LPD1; YFL018C    | cellular homeostasis;metabolic process;regulation of biological process                                  | mitochondrion;organelle lumen                   | catalytic activity;nucleotide binding                                          | 21.539 | 43.367 | 2.01 |
| Q02950   | 37S ribosomal protein MRP51, mitochondrial [OS=Saccharomyces cerevisiae S288c]                                     | 855985 | MRP51; YPL118W   | cell organization and biogenesis;metabolic process                                                       | mitochondrion;ribosome                          | structural molecule activity                                                   | 0.668  | 1.346  | 2.01 |
| Q06236   | Mitochondrial inner membrane protein SHH4 [OS=Saccharomyces cerevisiae S288c]                                      | 850861 | SHH4; YLR164W    | metabolic process                                                                                        | membrane;mitochondrion                          | catalytic activity;metal ion binding                                           | 3.217  | 6.499  | 2.02 |
| P21801   | Succinate dehydrogenase [ubiquinone] iron-sulfur subunit, mitochondrial [OS=Saccharomyces cerevisiae S288c]        | 850685 | SDH2; YLL041C    | metabolic process;transport                                                                              | membrane;mitochondrion                          | catalytic activity;metal ion binding                                           | 18.684 | 37.747 | 2.02 |
| P48237   | Mitochondrial group I intron splicing factor CCM1 [OS=Saccharomyces cerevisiae S288c]                              | 853053 | CCM1; YGR150C    | cell organization and biogenesis;metabolic process                                                       | mitochondrion                                   | RNA binding                                                                    | 0.044  | 0.089  | 2.02 |
| P51998   | 54S ribosomal protein yml6, mitochondrial [OS=Saccharomyces cerevisiae S288c]                                      | 854983 | YML6; YML025C    | cell organization and biogenesis;metabolic process                                                       | mitochondrion;ribosome                          | RNA binding;structural molecule activity                                       | 1.154  | 2.34   | 2.03 |

|          |                                                                                                            |        |                         |                                                                                              |                                                                        |                                                                                     |        |        |      |
|----------|------------------------------------------------------------------------------------------------------------|--------|-------------------------|----------------------------------------------------------------------------------------------|------------------------------------------------------------------------|-------------------------------------------------------------------------------------|--------|--------|------|
| P47158   | Putative transferase CAF17, mitochondrial [OS=Saccharomyces cerevisiae S288c]                              | 853586 | IBA57; YJR122W          | cell organization and biogenesis;metabolic process                                           | mitochondrion;organelle lumen                                          | catalytic activity                                                                  | 0.075  | 0.155  | 2.07 |
| P38860   | GPase MTG2, mitochondrial [OS=Saccharomyces cerevisiae S288c]                                              | 856573 | MTG2; YHR168W           | metabolic process;transport                                                                  | membrane;mitochondrion                                                 | catalytic activity;metal ion binding;nucleotide binding;transporter activity        | 0.07   | 0.145  | 2.07 |
| P40051   | Intermediate cleaving peptidase 55 [OS=Saccharomyces cerevisiae S288c]                                     | 856811 | ICP55; YER078C          | metabolic process;regulation of biological process                                           | membrane;mitochondrion;nucleus                                         | catalytic activity;metal ion binding                                                | 0.077  | 0.16   | 2.08 |
| P07263-1 | Histidine--tRNA ligase, mitochondrial [OS=Saccharomyces cerevisiae S288c]                                  | 856145 | HTS1; YPR033C           | cell organization and biogenesis;metabolic process                                           | cytoplasm;mitochondrion                                                | catalytic activity;nucleotide binding;RNA binding                                   | 0.064  | 0.133  | 2.08 |
| Q08645   | folypolyglutamate synthase [OS=Saccharomyces cerevisiae S288c]                                             | 854415 | MET7; YOR241W           | metabolic process                                                                            | cytoplasm;endoplasmic reticulum;membrane;mitochondrion;organelle lumen | catalytic activity;nucleotide binding                                               | 0.072  | 0.15   | 2.08 |
| P40530   | [Pyruvate dehydrogenase (acetyl-transferring)] kinase 1, mitochondrial [OS=Saccharomyces cerevisiae S288c] | 854769 | PKP1; YIL042C           | metabolic process                                                                            | mitochondrion;organelle lumen                                          | catalytic activity;nucleotide binding;protein binding                               | 0.551  | 1.154  | 2.09 |
| P14905   | cytochrome B translational activator protein CBS2 [OS=Saccharomyces cerevisiae S288c]                      | 851778 | CBS2; YDR197W           | metabolic process;regulation of biological process                                           | mitochondrion;ribosome                                                 | catalytic activity;nucleotide binding;translation regulator activity                | 0.096  | 0.202  | 2.10 |
| P36527   | 54S ribosomal protein L28, mitochondrial [OS=Saccharomyces cerevisiae S288c]                               | 852073 | MRPL28; YDR462W         | cell organization and biogenesis;metabolic process                                           | mitochondrion;ribosome                                                 | structural molecule activity                                                        | 0.874  | 1.848  | 2.11 |
| Q12204   | Probable phospholipase YOR022C, mitochondrial [OS=Saccharomyces cerevisiae S288c]                          | 854187 | YOR022C; YOR022C        | metabolic process                                                                            | mitochondrion                                                          | catalytic activity;metal ion binding                                                | 0.11   | 0.233  | 2.12 |
| P24720   | Protein MNE1 [OS=Saccharomyces cerevisiae S288c]                                                           | 854532 | MNE1; YOR350C           | metabolic process                                                                            | cytoplasm;mitochondrion;organelle lumen                                |                                                                                     | 0.125  | 0.266  | 2.13 |
| P38816   | thioredoxin reductase 2, mitochondrial [OS=Saccharomyces cerevisiae S288c]                                 | 856506 | TRR2; YHR106W           | cellular homeostasis;metabolic process;regulation of biological process;response to stimulus | cytoplasm;mitochondrion                                                | antioxidant activity;catalytic activity                                             | 0.136  | 0.292  | 2.15 |
| Q12374   | Nuclear control of ATPase protein 2 [OS=Saccharomyces cerevisiae S288c]                                    | 856278 | NCA2; YPR155C           | metabolic process                                                                            | membrane;mitochondrion                                                 |                                                                                     | 0.468  | 1.021  | 2.18 |
| P28241   | Isocitrate dehydrogenase [NAD] subunit 2, mitochondrial [OS=Saccharomyces cerevisiae S288c]                | 854303 | IDH2; YOR136W           | metabolic process                                                                            | mitochondrion;organelle lumen                                          | catalytic activity;metal ion binding;nucleotide binding;protein binding;RNA binding | 3.642  | 7.962  | 2.19 |
| P34231   | Uncharacterized protein YKL187C [OS=Saccharomyces cerevisiae S288c]                                        | 853648 | FAT3; YKL187C; YKL187C  | cell organization and biogenesis;transport                                                   | membrane;mitochondrion                                                 |                                                                                     | 0.194  | 0.425  | 2.19 |
| P19955   | 37S ribosomal protein YMR-31, mitochondrial [OS=Saccharomyces cerevisiae S288c]                            | 850610 | YMR31; YFR049W          | cell organization and biogenesis;metabolic process                                           | mitochondrion;ribosome                                                 | catalytic activity;protein binding;structural molecule activity                     | 26.826 | 58.948 | 2.20 |
| P40491   | ATP synthase assembly factor fmc1, mitochondrial [OS=Saccharomyces cerevisiae S288c]                       | 854709 | FMC1; YIL098C           | cell communication;cell organization and biogenesis;metabolic process;response to stimulus   | mitochondrion;organelle lumen                                          |                                                                                     | 0.212  | 0.468  | 2.21 |
| P23180   | Probable oxidoreductase AIM17 [OS=Saccharomyces cerevisiae S288c]                                          | 856365 | AIM17; YHL021C          | cell organization and biogenesis;metabolic process                                           | mitochondrion                                                          | catalytic activity;metal ion binding                                                | 4.623  | 10.22  | 2.21 |
| Q07534   | Solute carrier family 25 member 38 homolog [OS=Saccharomyces cerevisiae S288c]                             | 851439 | YDL119C; HEM25; YDL119C | metabolic process;transport                                                                  | membrane;mitochondrion                                                 | structural molecule activity;transporter activity                                   | 0.245  | 0.551  | 2.25 |
| P10849   | mitochondrial transcription factor 2 [OS=Saccharomyces cerevisiae S288c]                                   | 851517 | MTF2; YDL044C           | metabolic process                                                                            | mitochondrion;organelle lumen                                          | protein binding;RNA binding                                                         | 0.259  | 0.585  | 2.26 |
| P39965   | probable proline--tRNA ligase, mitochondrial [OS=Saccharomyces cerevisiae S288c]                           | 856820 | AIM10; YER087W          | metabolic process                                                                            | cytoplasm;mitochondrion                                                | catalytic activity;nucleotide binding;RNA binding                                   | 0.266  | 0.604  | 2.27 |
| P22353   | 54S ribosomal protein L8, mitochondrial [OS=Saccharomyces cerevisiae S288c]                                | 853382 | MRPL8; YIL063C          | cell organization and biogenesis;metabolic process                                           | mitochondrion;ribosome                                                 | structural molecule activity                                                        | 0.848  | 1.929  | 2.27 |
| P49334   | Mitochondrial import receptor subunit tom22 [OS=Saccharomyces cerevisiae S288c]                            | 855592 | TOM22; YNL131W          | cell organization and biogenesis;transport                                                   | membrane;mitochondrion                                                 | protein binding;transporter activity                                                | 0.292  | 0.668  | 2.29 |
| P40496   | 37S ribosomal protein S25, mitochondrial [OS=Saccharomyces cerevisiae S288c]                               | 854715 | RSM25; YIL093C          | cell organization and biogenesis;metabolic process                                           | mitochondrion;ribosome                                                 | structural molecule activity                                                        | 0.292  | 0.668  | 2.29 |
| P32897   | Mitochondrial import inner membrane translocase subunit tim23 [OS=Saccharomyces                            | 855751 | TIM23; YNR017W          | transport                                                                                    | membrane;mitochondrion                                                 | protein binding;transporter activity                                                | 2.981  | 6.943  | 2.33 |

|        |                                                                                                   |        |                     |                                                                                     |                                 |                                                                                |       |        |      |
|--------|---------------------------------------------------------------------------------------------------|--------|---------------------|-------------------------------------------------------------------------------------|---------------------------------|--------------------------------------------------------------------------------|-------|--------|------|
|        | cerevisiae S288c]                                                                                 |        |                     |                                                                                     |                                 |                                                                                |       |        |      |
| P39952 | Mitochondrial inner membrane protein OXA1 [OS=Saccharomyces cerevisiae S288c]                     | 856898 | OXA1; YER154W       | cell organization and biogenesis;transport                                          | membrane;mitochondrion          | transporter activity                                                           | 1.371 | 3.217  | 2.35 |
| P53881 | 54S ribosomal protein L22, mitochondrial [OS=Saccharomyces cerevisiae S288c]                      | 855544 | MRPL22; YNL177C     | cell organization and biogenesis;metabolic process                                  | mitochondrion;ribosome          | RNA binding;structural molecule activity                                       | 1.154 | 2.728  | 2.36 |
| P39726 | Glycine cleavage system H protein, mitochondrial [OS=Saccharomyces cerevisiae S288c]              | 851254 | GCV3; YAL044C       | metabolic process                                                                   | mitochondrion                   | catalytic activity                                                             | 4.995 | 11.915 | 2.39 |
| P25348 | 54S ribosomal protein L32, mitochondrial [OS=Saccharomyces cerevisiae S288c]                      | 850359 | MRPL32; YCR003W     | cell organization and biogenesis;metabolic process                                  | membrane;mitochondrion;ribosome | RNA binding;structural molecule activity                                       | 0.389 | 0.931  | 2.39 |
| Q04401 | Succinate dehydrogenase assembly factor 3, mitochondrial [OS=Saccharomyces cerevisiae S288c]      | 852123 | ACN9; SDH7; YDR511W | cell organization and biogenesis;regulation of biological process                   | mitochondrion;organelle lumen   |                                                                                | 0.389 | 0.931  | 2.39 |
| Q12497 | Protein FMP16, mitochondrial [OS=Saccharomyces cerevisiae S288c]                                  | 851642 | FMP16; YDR070C      |                                                                                     | mitochondrion                   |                                                                                | 0.389 | 0.931  | 2.39 |
| P12687 | 54S ribosomal protein L2, mitochondrial [OS=Saccharomyces cerevisiae S288c]                       | 855727 | MRP7; YNL005C       | cell organization and biogenesis;metabolic process                                  | mitochondrion;ribosome          | catalytic activity;RNA binding;structural molecule activity                    | 1.565 | 3.806  | 2.43 |
| P38958 | Protein PET100, mitochondrial [OS=Saccharomyces cerevisiae S288c]                                 | 851651 | PET100; YDR079W     | cell organization and biogenesis                                                    | membrane;mitochondrion          | protein binding                                                                | 0.468 | 1.154  | 2.47 |
| Q06011 | Protein ECM19 [OS=Saccharomyces cerevisiae S288c]                                                 | 851106 | ECM19; YLR390W      | cell organization and biogenesis                                                    | membrane;mitochondrion          |                                                                                | 0.468 | 1.154  | 2.47 |
| P32445 | Single-stranded DNA-binding protein RIM1, mitochondrial [OS=Saccharomyces cerevisiae S288c]       | 850395 | RIM1; YCR028C-A     | cell organization and biogenesis;metabolic process;regulation of biological process | mitochondrion                   | DNA binding                                                                    | 3.642 | 9      | 2.47 |
| P81451 | ATP synthase subunit K, mitochondrial [OS=Saccharomyces cerevisiae S288c]                         | 854077 | ATP19; YOL077W-A    | cell organization and biogenesis;metabolic process;transport                        | membrane;mitochondrion          | catalytic activity;transporter activity                                        | 3.642 | 9      | 2.47 |
| P07255 | Cytochrome c oxidase subunit 7A [OS=Saccharomyces cerevisiae S288c]                               | 851492 | COX9; YDL067C       | metabolic process;transport                                                         | membrane;mitochondrion          | catalytic activity;transporter activity                                        | 3.642 | 9      | 2.47 |
| P53875 | 54S ribosomal protein L19, mitochondrial [OS=Saccharomyces cerevisiae S288c]                      | 855536 | MRPL19; YNL185C     | cell organization and biogenesis;metabolic process                                  | mitochondrion;ribosome          | RNA binding;structural molecule activity                                       | 0.52  | 1.31   | 2.52 |
| P36520 | 54S ribosomal protein L10, mitochondrial [OS=Saccharomyces cerevisiae S288c]                      | 855436 | MRPL10; YNL284C     | cell organization and biogenesis;metabolic process                                  | mitochondrion;ribosome          | structural molecule activity                                                   | 0.551 | 1.404  | 2.55 |
| P38300 | Inner membrane mitoribosome receptor MBA1, mitochondrial [OS=Saccharomyces cerevisiae S288c]      | 852483 | MBA1; YBR185C       | cell organization and biogenesis;regulation of biological process                   | membrane;mitochondrion          |                                                                                | 0.585 | 1.512  | 2.58 |
| P02381 | Ribosomal protein VAR1, mitochondrial [OS=Saccharomyces cerevisiae S288c]                         | 854586 | VAR1; Q0140         | cell organization and biogenesis;metabolic process                                  | mitochondrion;ribosome          | structural molecule activity                                                   | 0.688 | 1.848  | 2.69 |
| Q03430 | 37S ribosomal protein RSM28, mitochondrial [OS=Saccharomyces cerevisiae S288c]                    | 852105 | RSM28; YDR494W      | cell organization and biogenesis;metabolic process                                  | mitochondrion;ribosome          | structural molecule activity                                                   | 1.462 | 3.962  | 2.71 |
| P47015 | Altered inheritance of mitochondria protein 23, mitochondrial [OS=Saccharomyces cerevisiae S288c] | 853310 | AIM23; YJL131C      | metabolic process                                                                   | mitochondrion                   | RNA binding                                                                    | 0.35  | 1.015  | 2.90 |
| P38325 | Mitochondrial outer membrane protein OM14 [OS=Saccharomyces cerevisiae S288c]                     | 852531 | OM14; YBR230C       | transport                                                                           | membrane;mitochondrion          |                                                                                | 6.197 | 18.307 | 2.95 |
| Q01163 | 37S ribosomal protein S23, mitochondrial [OS=Saccharomyces cerevisiae S288c]                      | 852748 | RSM23; YGL129C      | cell organization and biogenesis;metabolic process                                  | mitochondrion;ribosome          | catalytic activity;nucleotide binding;RNA binding;structural molecule activity | 0.983 | 2.932  | 2.98 |
| P08525 | Cytochrome b-c1 complex subunit 8 [OS=Saccharomyces cerevisiae S288c]                             | 853273 | QCR8; YJL166W       | metabolic process;transport                                                         | membrane;mitochondrion          | catalytic activity;transporter activity                                        | 2.981 | 9      | 3.02 |
| Q03713 | Respiratory supercomplex factor 1, mitochondrial [OS=Saccharomyces cerevisiae S288c]              | 854978 | RCF1; YML030W       | cell organization and biogenesis                                                    | membrane;mitochondrion          |                                                                                | 2.162 | 6.943  | 3.21 |
| P42847 | 37S ribosomal protein S18, mitochondrial [OS=Saccharomyces cerevisiae S288c]                      | 855410 | MRPS18; YNL306W     | cell organization and biogenesis;metabolic process                                  | mitochondrion;ribosome          | RNA binding;structural molecule activity                                       | 0.54  | 1.738  | 3.22 |
| P41911 | Glycerol-3-phosphate dehydrogenase [NAD(+)] 2, mitochondrial [OS=Saccharomyces cerevisiae S288c]  | 854095 | GPD2; YOL059W       | metabolic process                                                                   | cytoplasm;cytosol;mitochondrion | catalytic activity;nucleotide binding;protein binding                          | 0.089 | 0.292  | 3.28 |
| P25038 | Translation initiation factor IF-2, mitochondrial [OS=Saccharomyces cerevisiae S288c]             | 854135 | IFM1; YOL023W       | cell organization and biogenesis;metabolic process                                  | mitochondrion;nucleus           | catalytic activity;nucleotide binding;RNA                                      | 0.11  | 0.369  | 3.35 |

|        |                                                                                                   |            |                                |                                                    |                                         |                                                                     |       |       |      |
|--------|---------------------------------------------------------------------------------------------------|------------|--------------------------------|----------------------------------------------------|-----------------------------------------|---------------------------------------------------------------------|-------|-------|------|
|        |                                                                                                   |            |                                |                                                    |                                         | binding                                                             |       |       |      |
| P46998 | mitochondrial membrane protein FMP33 [OS=Saccharomyces cerevisiae S288c]                          | 85327<br>9 | FMP33;<br>YJL161<br>W          |                                                    | membrane;mitochondrion                  |                                                                     | 1.371 | 4.623 | 3.37 |
| P49954 | probable hydrolase NIT3 [OS=Saccharomyces cerevisiae S288c]                                       | 85106<br>5 | NIT3;<br>YLR351<br>C           | metabolic process                                  | cytoplasm;mitochondrion                 | catalytic activity                                                  | 0.129 | 0.438 | 3.40 |
| P38297 | Mitofusin FZO1 [OS=Saccharomyces cerevisiae S288c]                                                | 85247<br>7 | FZO1;<br>YBR179<br>C           | cell organization and biogenesis                   | membrane;mitochondrion                  | catalytic activity;nucleotide binding;protein binding               | 0.142 | 0.49  | 3.45 |
| P47150 | 37S ribosomal protein S7, mitochondrial [OS=Saccharomyces cerevisiae S288c]                       | 85357<br>8 | RSM7;<br>YJR113<br>C           | cell organization and biogenesis;metabolic process | mitochondrion;ribosome                  | RNA binding;structural molecule activity                            | 0.334 | 1.154 | 3.46 |
| P38884 | Altered inheritance of mitochondria protein 18, mitochondrial [OS=Saccharomyces cerevisiae S288c] | 85660<br>5 | AIM18;<br>YHR198<br>C          |                                                    | mitochondrion                           | catalytic activity                                                  | 0.145 | 0.501 | 3.46 |
| P08425 | phenylalanine--tRNA ligase, mitochondrial [OS=Saccharomyces cerevisiae S288c]                     | 85616<br>0 | MSF1;<br>YPR047<br>W           | metabolic process                                  | cytoplasm;mitochondrion;organelle lumen | catalytic activity;metal ion binding;nucleotide binding;RNA binding | 0.16  | 0.562 | 3.51 |
| P53724 | 54S ribosomal protein L50, mitochondrial [OS=Saccharomyces cerevisiae S288c]                      | 85575<br>6 | MRPL50<br>;<br>YNR022<br>C     | cell organization and biogenesis;metabolic process | mitochondrion;ribosome                  | structural molecule activity                                        | 0.585 | 2.162 | 3.70 |
| P21771 | 37S ribosomal protein S28, mitochondrial [OS=Saccharomyces cerevisiae S288c]                      | 85193<br>7 | MRP52<br>8;<br>YDR337<br>W     | cell organization and biogenesis;metabolic process | mitochondrion;ribosome                  | RNA binding;structural molecule activity                            | 0.438 | 1.637 | 3.74 |
| Q06090 | 54S ribosomal protein L51, mitochondrial [OS=Saccharomyces cerevisiae S288c]                      | 85621<br>4 | MRPL51<br>;<br>YPR100<br>W     | cell organization and biogenesis;metabolic process | mitochondrion;ribosome                  | RNA binding;structural molecule activity                            | 0.292 | 1.154 | 3.95 |
| P53157 | Mitochondrial pyruvate carrier 1 [OS=Saccharomyces cerevisiae S288c]                              | 85280<br>0 | FMP37;<br>MPC1;<br>YGL080<br>W | transport                                          | membrane;mitochondrion                  | transporter activity                                                | 0.468 | 2.162 | 4.62 |
| P25626 | 54S ribosomal protein IMG1, mitochondrial [OS=Saccharomyces cerevisiae S288c]                     | 85041<br>3 | IMG1;<br>YCR046<br>C           | cell organization and biogenesis;metabolic process | mitochondrion;ribosome                  | structural molecule activity                                        | 1.031 | 4.878 | 4.73 |
| P53166 | ATP-dependent RNA helicase mrh4, mitochondrial [OS=Saccharomyces cerevisiae S288c]                | 85281<br>6 | MRH4;<br>YGL064<br>C           | cell organization and biogenesis;metabolic process | mitochondrion;organelle lumen           | catalytic activity;nucleotide binding;RNA binding                   | 0.225 | 1.106 | 4.92 |
| P36531 | 54S ribosomal protein L36, mitochondrial [OS=Saccharomyces cerevisiae S288c]                      | 85241<br>9 | MRPL36<br>;<br>YBR122<br>C     | cell organization and biogenesis;metabolic process | mitochondrion;ribosome                  | structural molecule activity                                        | 0.668 | 3.642 | 5.45 |
| P36517 | 54S ribosomal protein L4, mitochondrial [OS=Saccharomyces cerevisiae S288c]                       | 85116<br>0 | MRPL4;<br>YLR439<br>W          | cell organization and biogenesis;metabolic process | mitochondrion;ribosome                  | structural molecule activity                                        | 0.369 | 2.511 | 6.80 |

**Supplemental Table S3. The relative concentrations of proteins in mitochondria purified from WT cells cultured with or without LCA.** Mitochondria were purified from WT cells recovered on day 7 of cell culturing with or without LCA. Mass spectrometry-based identification and quantitation of proteins recovered in purified mitochondria were performed as described in Materials and methods. The exponentially modified protein abundance index (emPAI) provided by the "Proteome Discoverer" software was used to calculate the relative abundance of mitochondrial proteins between specified datasets. Data on the relative concentrations of mitochondrial proteins are presented as means of 2 independent experiments.

| Accession | Description                                                                                         | Entrez Gene ID | Gene ID                 | Biological Process                                                                   | Cellular Component                                 | Molecular Function                                                         | emPAI WT | emPAI WT + LCA | Ratio WT + LCA/WT |
|-----------|-----------------------------------------------------------------------------------------------------|----------------|-------------------------|--------------------------------------------------------------------------------------|----------------------------------------------------|----------------------------------------------------------------------------|----------|----------------|-------------------|
| P38120    | 37S ribosomal protein S9, mitochondrial                                                             | 852443         | MRP59                   | cell organization and biogenesis; metabolic process                                  | mitochondrion; ribosome                            | RNA binding; structural molecule activity                                  | 3.437    | 0.145          | 0.04              |
| P36163    | mitochondrial metalloendopeptidase OMA1                                                             | 853962         | OMA1                    | metabolic process                                                                    | membrane; mitochondrion                            | catalytic activity; metal ion binding                                      | 0.931    | 0.116          | 0.12              |
| P47140    | Altered inheritance rate of mitochondria protein 25                                                 | 853563         | AIM25                   | cell organization and biogenesis                                                     | membrane; mitochondrion                            | transporter activity                                                       | 0.874    | 0.11           | 0.13              |
| Q12349    | ATP synthase subunit H, mitochondrial                                                               | 851002         | ATP14                   | cell organization and biogenesis; metabolic process; transport                       | membrane; mitochondrion                            | catalytic activity; transporter activity                                   | 2.728    | 0.389          | 0.14              |
| P32317    | Protein AFG1 [OS=Saccharomyces cerevisiae S288c]                                                    | 856658         | AFG1; YEL052W           | cell organization and biogenesis; metabolic process; response to stimulus; transport | membrane; mitochondrion                            | catalytic activity; nucleotide binding                                     | 1.154    | 0.166          | 0.14              |
| Q12283    | Malonyl CoA-acyl carrier protein transacylase, mitochondrial [OS=Saccharomyces cerevisiae S288c]    | 854396         | MCT1; YOR221C           | metabolic process                                                                    | mitochondrion                                      | catalytic activity                                                         | 0.896    | 0.136          | 0.15              |
| Q07534    | Solute carrier family 25 member 38 homolog [OS=Saccharomyces cerevisiae S288c]                      | 851439         | YDL119C; HEM25; YDL119C | metabolic process; transport                                                         | membrane; mitochondrion                            | structural molecule activity; transporter activity                         | 0.73     | 0.116          | 0.16              |
| P53166    | ATP-dependent RNA helicase mrh4, mitochondrial [OS=Saccharomyces cerevisiae S288c]                  | 852816         | MRH4; YGL064C           | cell organization and biogenesis; metabolic process                                  | mitochondrion; organelle lumen                     | catalytic activity; nucleotide binding; RNA binding                        | 1.412    | 0.225          | 0.16              |
| P16547    | Mitochondrial outer membrane protein OM45 [OS=Saccharomyces cerevisiae S288c]                       | 854670         | OM45; YIL136W           |                                                                                      | membrane; mitochondrion                            |                                                                            | 300.995  | 51.481         | 0.17              |
| P22353    | 54S ribosomal protein L8, mitochondrial [OS=Saccharomyces cerevisiae S288c]                         | 853382         | MRPL8; YJL063C          | cell organization and biogenesis; metabolic process                                  | mitochondrion; ribosome                            | structural molecule activity                                               | 0.848    | 0.166          | 0.20              |
| Q08818    | Meiotic sister-chromatid recombination protein 6, mitochondrial [OS=Saccharomyces cerevisiae S288c] | 854536         | MSC6; YOR354C           | metabolic process                                                                    | mitochondrion; organelle lumen                     | RNA binding                                                                | 1.047    | 0.227          | 0.22              |
| P54115    | Magnesium-activated aldehyde dehydrogenase, cytosolic [OS=Saccharomyces cerevisiae S288c]           | 856044         | ALD6; YPL061W           | metabolic process; response to stimulus                                              | cytoplasm; cytosol; mitochondrion                  | catalytic activity                                                         | 0.346    | 0.077          | 0.22              |
| P22438    | Methionine--tRNA ligase, mitochondrial [OS=Saccharomyces cerevisiae S288c]                          | 853081         | MSM1; YGR171C           | metabolic process                                                                    | cytoplasm; cytosol; mitochondrion; organelle lumen | catalytic activity; nucleotide binding                                     | 0.292    | 0.066          | 0.23              |
| P25605    | Acetolactate synthase small subunit, mitochondrial [OS=Saccharomyces cerevisiae S288c]              | 850348         | ILV6; YCL009C           | metabolic process; regulation of biological process                                  | mitochondrion                                      | catalytic activity; enzyme regulator activity                              | 10.288   | 2.36           | 0.23              |
| P38969    | Pentamidine resistance factor, mitochondrial [OS=Saccharomyces cerevisiae S288c]                    | 854440         | PNT1; YOR266W           | cell organization and biogenesis; response to stimulus                               | membrane; mitochondrion                            |                                                                            | 0.711    | 0.166          | 0.23              |
| P15179    | Aspartate--tRNA ligase, mitochondrial [OS=Saccharomyces cerevisiae S288c]                           | 856000         | MSD1; YPL104W           | metabolic process                                                                    | cytoplasm; mitochondrion; organelle lumen          | catalytic activity; nucleotide binding                                     | 0.708    | 0.174          | 0.25              |
| P21954    | Isocitrate dehydrogenase [NADP], mitochondrial [OS=Saccharomyces cerevisiae S288c]                  | 851493         | IDP1; YDL066W           | metabolic process                                                                    | mitochondrion                                      | catalytic activity; metal ion binding; nucleotide binding; protein binding | 33.145   | 8.261          | 0.25              |
| Q06678    | 54S ribosomal protein L35, mitochondrial [OS=Saccharomyces cerevisiae S288c]                        | 851921         | MRPL35; YDR322W         | cell organization and biogenesis; metabolic process                                  | mitochondrion; ribosome                            | structural molecule activity                                               | 1.219    | 0.304          | 0.25              |

|        |                                                                                                           |        |                  |                                                                                                                               |                                              |                                                            |        |       |      |
|--------|-----------------------------------------------------------------------------------------------------------|--------|------------------|-------------------------------------------------------------------------------------------------------------------------------|----------------------------------------------|------------------------------------------------------------|--------|-------|------|
| Q02784 | Monothiol glutaredoxin-5, mitochondrial [OS=Saccharomyces cerevisiae S288c]                               | 856048 | GRX5; YPL059W    | cell organization and biogenesis;cellular homeostasis;metabolic process;regulation of biological process;response to stimulus | mitochondrion;organelle lumen                | catalytic activity;metal ion binding                       | 2.594  | 0.668 | 0.26 |
| P25626 | 54S ribosomal protein IMG1, mitochondrial [OS=Saccharomyces cerevisiae S288c]                             | 850413 | IMG1; YCR046C    | cell organization and biogenesis;metabolic process                                                                            | mitochondrion;ribosome                       | structural molecule activity                               | 3.924  | 1.031 | 0.26 |
| P40858 | 54S ribosomal protein L49, mitochondrial [OS=Saccharomyces cerevisiae S288c]                              | 853349 | MRPL49; YJL096W  | cell organization and biogenesis;metabolic process                                                                            | mitochondrion;ribosome                       | RNA binding;structural molecule activity                   | 0.778  | 0.212 | 0.27 |
| P08525 | Cytochrome b-c1 complex subunit 8 [OS=Saccharomyces cerevisiae S288c]                                     | 853273 | QCR8; YJL166W    | metabolic process;transport                                                                                                   | membrane;mitochondrion                       | catalytic activity;transporter activity                    | 5.31   | 1.512 | 0.28 |
| P47015 | Altered inheritance of mitochondria protein 23, mitochondrial [OS=Saccharomyces cerevisiae S288c]         | 853310 | AIM23; YJL131C   | metabolic process                                                                                                             | mitochondrion                                | RNA binding                                                | 1.228  | 0.35  | 0.29 |
| P36519 | 54S ribosomal protein L7, mitochondrial [OS=Saccharomyces cerevisiae S288c]                               | 851823 | MRPL7; YDR237W   | cell organization and biogenesis;metabolic process                                                                            | mitochondrion;ribosome                       | RNA binding;structural molecule activity                   | 0.468  | 0.136 | 0.29 |
| P00401 | Cytochrome c oxidase subunit 1 [OS=Saccharomyces cerevisiae S288c]                                        | 854598 | COX1; Q0045      | metabolic process;transport                                                                                                   | membrane;mitochondrion                       | catalytic activity;metal ion binding;transporter activity  | 1.61   | 0.468 | 0.29 |
| P25573 | Mitochondrial inner membrane i-AAA protease supercomplex subunit MGR1 [OS=Saccharomyces cerevisiae S288c] | 850313 | MGR1; YCL044C    | metabolic process                                                                                                             | membrane;mitochondrion                       | protein binding                                            | 1.031  | 0.304 | 0.29 |
| Q12029 | Probable mitochondrial transport protein fsf1 [OS=Saccharomyces cerevisiae S288c]                         | 854445 | FSF1; YOR271C    | transport                                                                                                                     | membrane;mitochondrion                       | transporter activity                                       | 2.793  | 0.833 | 0.30 |
| P40035 | Mitochondrial phosphate carrier protein 2 [OS=Saccharomyces cerevisiae S288c]                             | 856779 | PIC2; YER053C    | cellular homeostasis;metabolic process;transport                                                                              | membrane;mitochondrion                       | structural molecule activity;transporter activity          | 2.793  | 0.833 | 0.30 |
| P36527 | 54S ribosomal protein L28, mitochondrial [OS=Saccharomyces cerevisiae S288c]                              | 852073 | MRPL28; YDR462W  | cell organization and biogenesis;metabolic process                                                                            | mitochondrion;ribosome                       | structural molecule activity                               | 4.337  | 1.31  | 0.30 |
| Q08686 | Thiosulfate sulfurtransferase TUM1 [OS=Saccharomyces cerevisiae S288c]                                    | 854425 | TUM1; YOR251C    | metabolic process                                                                                                             | cytoplasm;mitochondrion                      | catalytic activity;protein binding                         | 0.334  | 0.101 | 0.30 |
| P40015 | inositol phosphophingolipids phospholipase C [OS=Saccharomyces cerevisiae S288c]                          | 856739 | IS1C1; YER019W   | metabolic process;response to stimulus                                                                                        | endoplasmic reticulum;membrane;mitochondrion | catalytic activity;metal ion binding                       | 0.334  | 0.101 | 0.30 |
| P41911 | Glycerol-3-phosphate dehydrogenase [NAD(+)] 2, mitochondrial [OS=Saccharomyces cerevisiae S288c]          | 854095 | GPD2; YOL059W    | metabolic process                                                                                                             | cytoplasm;cytosol;mitochondrion              | catalytic activity;nucleotide binding;protein binding      | 0.292  | 0.089 | 0.30 |
| P00128 | Cytochrome b-c1 complex subunit 7 [OS=Saccharomyces cerevisiae S288c]                                     | 852142 | QCR7; YDR529C    | cell organization and biogenesis;metabolic process;transport                                                                  | membrane;mitochondrion                       | catalytic activity;transporter activity                    | 11.915 | 3.642 | 0.31 |
| P07266 | Mitochondrial RNA-splicing protein MRS1 [OS=Saccharomyces cerevisiae S288c]                               | 854839 | MRS1; YIR021W    | cell organization and biogenesis;metabolic process                                                                            | mitochondrion;organelle lumen                | catalytic activity;DNA binding;RNA binding                 | 0.304  | 0.093 | 0.31 |
| P32493 | ATPase expression protein 1, mitochondrial [OS=Saccharomyces cerevisiae S288c]                            | 855086 | AEP1; YMR064W    | regulation of biological process                                                                                              | mitochondrion                                | translation regulator activity                             | 0.233  | 0.072 | 0.31 |
| P41921 | glutathione reductase [OS=Saccharomyces cerevisiae S288c]                                                 | 856014 | GLR1; YPL091W    | cellular homeostasis;metabolic process;regulation of biological process;response to stimulus                                  | cytoplasm;cytosol;mitochondrion;nucleus      | antioxidant activity;catalytic activity;nucleotide binding | 0.241  | 0.075 | 0.31 |
| P00420 | Cytochrome c oxidase subunit 3 [OS=Saccharomyces cerevisiae S288c]                                        | 854627 | COX3; Q0275      | metabolic process;transport                                                                                                   | membrane;mitochondrion                       | catalytic activity;transporter activity                    | 3.642  | 1.154 | 0.32 |
| P53881 | 54S ribosomal protein L22, mitochondrial [OS=Saccharomyces cerevisiae S288c]                              | 855544 | MRPL22; YNL177C  | cell organization and biogenesis;metabolic process                                                                            | mitochondrion;ribosome                       | RNA binding;structural molecule activity                   | 1.683  | 0.551 | 0.33 |
| P36151 | Uncharacterized protein YKR070W [OS=Saccharomyces cerevisiae S288c]                                       | 853944 | YKR070W; YKR070W | metabolic process                                                                                                             | mitochondrion                                |                                                            | 1.336  | 0.438 | 0.33 |
| P12686 | 37S ribosomal protein MRP13, mitochondrial [OS=Saccharomyces cerevisiae S288c]                            | 852975 | MRP13; YGR084C   | cell organization and biogenesis;metabolic process                                                                            | mitochondrion;ribosome                       | structural molecule activity                               | 0.778  | 0.259 | 0.33 |
| Q12467 | MIOREX complex component 4 [OS=Saccharomyces cerevisiae S288c]                                            | 855935 | YPL168W; MRX4;   |                                                                                                                               | membrane;mitochondrion                       |                                                            | 0.585  | 0.202 | 0.35 |



|        |                                                                                                        |        |                      |                                                    |                                                  |                                                                                |         |        |      |
|--------|--------------------------------------------------------------------------------------------------------|--------|----------------------|----------------------------------------------------|--------------------------------------------------|--------------------------------------------------------------------------------|---------|--------|------|
|        |                                                                                                        |        | YPL168W              |                                                    |                                                  |                                                                                |         |        |      |
| P32902 | 37S ribosomal protein MRP4, mitochondrial [OS=Saccharomyces cerevisiae S288c]                          | 856384 | MRP4; YHL004W        | cell organization and biogenesis;metabolic process | mitochondrion;ribosome                           | structural molecule activity                                                   | 0.957   | 0.334  | 0.35 |
| P53721 | Respiratory supercomplex factor 2, mitochondrial [OS=Saccharomyces cerevisiae S288c]                   | 855752 | RCF2; YNR018W        | cell organization and biogenesis                   | membrane;mitochondrion                           |                                                                                | 7.111   | 2.511  | 0.35 |
| P07251 | ATP synthase subunit alpha, mitochondrial [OS=Saccharomyces cerevisiae S288c]                          | 852177 | ATP1; YBL099W        | metabolic process;transport                        | cytosol;membrane;mitochondrion                   | catalytic activity;nucleotide binding;transporter activity                     | 26.826  | 9.661  | 0.36 |
| P38885 | Altered inheritance of mitochondria protein 46, mitochondrial [OS=Saccharomyces cerevisiae S288c]      | 856606 | AIM46; YHR199C       |                                                    | mitochondrion                                    | catalytic activity                                                             | 1.994   | 0.73   | 0.37 |
| P48360 | Probable NADPH:adrenodoxin oxidoreductase, mitochondrial [OS=Saccharomyces cerevisiae S288c]           | 851982 | ARH1; YDR376W        | cellular homeostasis;metabolic process;transport   | cytoplasm;membrane;mitochondrion;organelle lumen | catalytic activity                                                             | 0.682   | 0.25   | 0.37 |
| P32897 | Mitochondrial import inner membrane translocase subunit tim23 [OS=Saccharomyces cerevisiae S288c]      | 855751 | TIM23; YNR017W       | transport                                          | membrane;mitochondrion                           | protein binding;transporter activity                                           | 4.012   | 1.512  | 0.38 |
| P00360 | glyceraldehyde-3-phosphate dehydrogenase 1 [OS=Saccharomyces cerevisiae S288c]                         | 853395 | TDH1; YJL052W        | metabolic process                                  | cytoplasm;cytosol;membrane;mitochondrion         | catalytic activity;nucleotide binding                                          | 1.721   | 0.65   | 0.38 |
| P32340 | Rotenone-insensitive NADH-ubiquinone oxidoreductase, mitochondrial [OS=Saccharomyces cerevisiae S288c] | 854919 | NDI1; YML120C        | metabolic process;regulation of biological process | membrane;mitochondrion;organelle lumen           | catalytic activity;nucleotide binding                                          | 16.433  | 6.279  | 0.38 |
| P39726 | Glycine cleavage system H protein, mitochondrial [OS=Saccharomyces cerevisiae S288c]                   | 851254 | GCV3; YAL044C        | metabolic process                                  | mitochondrion                                    | catalytic activity                                                             | 6.743   | 2.594  | 0.38 |
| P40502 | Altered inheritance of mitochondria protein 19, mitochondrial [OS=Saccharomyces cerevisiae S288c]      | 854722 | AIM19; YIL087C       |                                                    | membrane;mitochondrion                           |                                                                                | 1.512   | 0.585  | 0.39 |
| P07246 | Alcohol dehydrogenase 3, mitochondrial [OS=Saccharomyces cerevisiae S288c]                             | 855107 | ADH3; YMR083W        | metabolic process                                  | mitochondrion;organelle lumen                    | catalytic activity;metal ion binding                                           | 7.031   | 2.728  | 0.39 |
| Q12482 | Mitochondrial aspartate-glutamate transporter AGC1 [OS=Saccharomyces cerevisiae S288c]                 | 856132 | AGC1; YPR021C        | metabolic process;transport                        | membrane;mitochondrion                           | structural molecule activity;transporter activity                              | 0.348   | 0.136  | 0.39 |
| Q01163 | 37S ribosomal protein S23, mitochondrial [OS=Saccharomyces cerevisiae S288c]                           | 852748 | RSM23; YGL129C       | cell organization and biogenesis;metabolic process | mitochondrion;ribosome                           | catalytic activity;nucleotide binding;RNA binding;structural molecule activity | 4.367   | 1.707  | 0.39 |
| P11914 | Mitochondrial-processing peptidase subunit alpha [OS=Saccharomyces cerevisiae S288c]                   | 856419 | MAS2; YHR024C        | metabolic process;transport                        | membrane;mitochondrion;organelle lumen           | catalytic activity;metal ion binding;protein binding                           | 2.311   | 0.905  | 0.39 |
| P37267 | Assembly factor cbp4 [OS=Saccharomyces cerevisiae S288c]                                               |        | CBP4                 | cell organization and biogenesis                   | membrane;mitochondrion                           |                                                                                | 3.329   | 1.31   | 0.39 |
| P50088 | Stationary phase gene 1 protein [OS=Saccharomyces cerevisiae S288c]                                    | 853151 | SPG1; YGR236C        |                                                    | endoplasmic reticulum;membrane;mitochondrion     |                                                                                | 157.489 | 62.096 | 0.39 |
| P40452 | Cytochrome c oxidase assembly factor 1 [OS=Saccharomyces cerevisiae S288c]                             | 854649 | COA1; YIL157C        | cell organization and biogenesis                   | membrane;mitochondrion                           | protein binding                                                                | 1.31    | 0.52   | 0.40 |
| P40496 | 37S ribosomal protein S25, mitochondrial [OS=Saccharomyces cerevisiae S288c]                           | 854715 | RSM25; YIL093C       | cell organization and biogenesis;metabolic process | mitochondrion;ribosome                           | structural molecule activity                                                   | 1.154   | 0.468  | 0.41 |
| P53311 | Mitochondrial pyruvate carrier 3 [OS=Saccharomyces cerevisiae S288c]                                   | 853158 | FMP43; MPC3; YGR243W | transport                                          | membrane;mitochondrion                           | transporter activity                                                           | 1.154   | 0.468  | 0.41 |
| P40215 | External NADH-ubiquinone oxidoreductase 1, mitochondrial [OS=Saccharomyces cerevisiae S288c]           | 855176 | NDE1; YMR145C        | metabolic process                                  | mitochondrion                                    | catalytic activity;nucleotide binding                                          | 5.078   | 2.065  | 0.41 |
| P40513 | Mitochondrial acidic protein MAM33 [OS=Saccharomyces cerevisiae S288c]                                 | 854740 | MAM33; YIL070C       | metabolic process;regulation of biological process | mitochondrion;organelle lumen                    | translation regulator activity                                                 | 2.831   | 1.154  | 0.41 |
| Q06698 | Putative ATP-dependent RNA helicase YLR419W [OS=Saccharomyces cerevisiae S288c]                        | 851137 | YLR419W; YLR419W     | metabolic process                                  | cytoplasm;mitochondrion;nucleus                  | catalytic activity;nucleotide binding;protein binding;RNA binding              | 0.201   | 0.082  | 0.41 |

|        |                                                                                                   |        |                        |                                                                                                             |                                               |                                                                                     |        |       |      |
|--------|---------------------------------------------------------------------------------------------------|--------|------------------------|-------------------------------------------------------------------------------------------------------------|-----------------------------------------------|-------------------------------------------------------------------------------------|--------|-------|------|
| Q04599 | 54S ribosomal protein L1, mitochondrial [OS=Saccharomyces cerevisiae S288c]                       | 851694 | MRPL1; YDR116C         | cell organization and biogenesis;metabolic process                                                          | mitochondrion;ribosome                        | RNA binding;structural molecule activity                                            | 1.069  | 0.438 | 0.41 |
| P28625 | Protein YIM1 [OS=Saccharomyces cerevisiae S288c]                                                  | 855183 | YIM1; YMR152W          | metabolic process;response to stimulus                                                                      | cytoplasm;endoplasmic reticulum;mitochondrion | catalytic activity;metal ion binding                                                | 1.069  | 0.438 | 0.41 |
| P35180 | mitochondrial import receptor subunit Tom20 [OS=Saccharomyces cerevisiae S288c]                   | 852973 | TOM20; YGR082W         | cell organization and biogenesis;transport                                                                  | membrane;mitochondrion                        | protein binding;transporter activity                                                | 1.031  | 0.425 | 0.41 |
| P38175 | 37S ribosomal protein MRP21, mitochondrial [OS=Saccharomyces cerevisiae S288c]                    | 852188 | MRP21; YBL090W         | cell organization and biogenesis;metabolic process                                                          | mitochondrion;ribosome                        | structural molecule activity                                                        | 1.031  | 0.425 | 0.41 |
| P28834 | Isocitrate dehydrogenase [NAD] subunit 1, mitochondrial [OS=Saccharomyces cerevisiae S288c]       | 855691 | IDH1; YNL037C          | metabolic process;transport                                                                                 | cytosol;mitochondrion;organelle lumen         | catalytic activity;metal ion binding;nucleotide binding;protein binding;RNA binding | 7.859  | 3.281 | 0.42 |
| P18496 | Mitochondrial ATPase complex subunit ATP10 [OS=Saccharomyces cerevisiae S288c]                    | 851109 | ATP10; YLR393W         | cell organization and biogenesis                                                                            | cytoplasm;membrane;mitochondrion              | protein binding                                                                     | 1.818  | 0.778 | 0.43 |
| Q02204 | 54S ribosomal protein L13, mitochondrial [OS=Saccharomyces cerevisiae S288c]                      | 853875 | MRPL13; YKR006C        | cell organization and biogenesis;metabolic process                                                          | mitochondrion;ribosome                        | structural molecule activity                                                        | 0.778  | 0.334 | 0.43 |
| Q99297 | Mitochondrial 2-oxodicarboxylate carrier 2 [OS=Saccharomyces cerevisiae S288c]                    | 854397 | ODC2; YOR222W          | metabolic process;transport                                                                                 | membrane;mitochondrion                        | structural molecule activity;transporter activity                                   | 0.778  | 0.334 | 0.43 |
| Q07914 | mitochondrial import inner membrane translocase subunit TIM14 [OS=Saccharomyces cerevisiae S288c] | 850694 | PAM18; YLR008C         | regulation of biological process;transport                                                                  | membrane;mitochondrion                        | enzyme regulator activity;protein binding;transporter activity                      | 0.778  | 0.334 | 0.43 |
| P32387 | 54S ribosomal protein L41, mitochondrial [OS=Saccharomyces cerevisiae S288c]                      | 852014 | MRP20; YDR405W         | cell organization and biogenesis;metabolic process                                                          | mitochondrion;ribosome                        | nucleotide binding;protein binding;RNA binding;structural molecule activity         | 0.719  | 0.311 | 0.43 |
| P38172 | MIOREX complex component 3 [OS=Saccharomyces cerevisiae S288c]                                    | 852181 | YBL095W; MRX3; YBL095W |                                                                                                             | membrane;mitochondrion                        |                                                                                     | 0.719  | 0.311 | 0.43 |
| P07213 | Mitochondrial import receptor subunit TOM70 [OS=Saccharomyces cerevisiae S288c]                   | 855602 | TOM70; YNL121C         | cell organization and biogenesis;transport                                                                  | membrane;mitochondrion                        | protein binding;transporter activity                                                | 2.665  | 1.154 | 0.43 |
| P14063 | 54S ribosomal protein L31, mitochondrial [OS=Saccharomyces cerevisiae S288c]                      | 853720 | MRPL31; YKL138C        | cell organization and biogenesis;metabolic process                                                          | mitochondrion;ribosome                        | structural molecule activity                                                        | 0.668  | 0.292 | 0.44 |
| Q06090 | 54S ribosomal protein L51, mitochondrial [OS=Saccharomyces cerevisiae S288c]                      | 856214 | MRPL51; YPR100W        | cell organization and biogenesis;metabolic process                                                          | mitochondrion;ribosome                        | RNA binding;structural molecule activity                                            | 0.668  | 0.292 | 0.44 |
| P42834 | mitochondrial DnaJ homolog 2 [OS=Saccharomyces cerevisiae S288c]                                  | 855388 | MDJ2; YNL328C          | regulation of biological process;transport                                                                  | membrane;mitochondrion                        | enzyme regulator activity;transporter activity                                      | 0.668  | 0.292 | 0.44 |
| Q06892 | NADH kinase POS5, mitochondrial [OS=Saccharomyces cerevisiae S288c]                               | 855913 | POS5; YPL188W          | metabolic process;response to stimulus                                                                      | mitochondrion;organelle lumen                 | catalytic activity;nucleotide binding                                               | 1.565  | 0.688 | 0.44 |
| P38152 | Tricarboxylate transport protein [OS=Saccharomyces cerevisiae S288c]                              | 852594 | CTP1; YBR291C          | metabolic process;transport                                                                                 | membrane;mitochondrion                        | structural molecule activity;transporter activity                                   | 0.551  | 0.245 | 0.44 |
| P40086 | Cytochrome c oxidase assembly protein cox15 [OS=Saccharomyces cerevisiae S288c]                   | 856884 | COX15; YER141W         | cell organization and biogenesis;metabolic process;transport                                                | membrane;mitochondrion                        | catalytic activity;transporter activity                                             | 2.594  | 1.154 | 0.44 |
| P36528 | 54S ribosomal protein L17, mitochondrial [OS=Saccharomyces cerevisiae S288c]                      | 855469 | MRPL17; YNL252C        | cell organization and biogenesis;metabolic process                                                          | mitochondrion;ribosome                        | structural molecule activity                                                        | 0.52   | 0.233 | 0.45 |
| P36013 | NAD-dependent malic enzyme, mitochondrial [OS=Saccharomyces cerevisiae S288c]                     | 853839 | MAE1; YKL029C          | metabolic process                                                                                           | mitochondrion;organelle lumen                 | catalytic activity;metal ion binding;nucleotide binding                             | 1.512  | 0.679 | 0.45 |
| P04840 | Mitochondrial outer membrane protein porin 1 [OS=Saccharomyces cerevisiae S288c]                  | 855669 | POR1; YNL055C          | cell death;cell organization and biogenesis;cellular homeostasis;regulation of biological process;transport | cytoplasm;membrane;mitochondrion              | transporter activity                                                                | 15.238 | 6.848 | 0.45 |
| Q07349 | MIOREX complex component 9 [OS=Saccharomyces cerevisiae S288c]                                    | 851535 | YDL027C; MRX9; YDL027C |                                                                                                             | endoplasmic reticulum;membrane;mitochondrion  |                                                                                     | 2.433  | 1.096 | 0.45 |
| P34224 | Uncharacterized protein YBL059W [OS=Saccharomyces cerevisiae S288c]                               | 852221 | YBL059W; YBL059W       |                                                                                                             | membrane;mitochondrion                        |                                                                                     | 0.468  | 0.212 | 0.45 |

|          |                                                                                                          |            |                         |                                                                                                          |                                                       |                                                                         |       |       |      |
|----------|----------------------------------------------------------------------------------------------------------|------------|-------------------------|----------------------------------------------------------------------------------------------------------|-------------------------------------------------------|-------------------------------------------------------------------------|-------|-------|------|
| P32839   | Mitochondrial chaperone BCS1 [OS=Saccharomyces cerevisiae S288c]                                         | 85198<br>1 | BCS1;<br>YDR375<br>C    | cell organization and biogenesis;metabolic process;response to stimulus;transport                        | cytosol;membrane;mitochondrion                        | catalytic activity;nucleotide binding;transporter activity              | 0.425 | 0.194 | 0.46 |
| Q01976   | ADP-ribose pyrophosphatase [OS=Saccharomyces cerevisiae S288c]                                           | 85240<br>8 | YSA1;<br>YBR111C        | metabolic process                                                                                        | cytoplasm;mitochondrion;nucleus                       | catalytic activity;metal ion binding                                    | 0.425 | 0.194 | 0.46 |
| P25348   | 54S ribosomal protein L32, mitochondrial [OS=Saccharomyces cerevisiae S288c]                             | 85035<br>9 | MRPL32;<br>YCR003<br>W  | cell organization and biogenesis;metabolic process                                                       | membrane;mitochondrion;ribosome                       | RNA binding;structural molecule activity                                | 0.389 | 0.179 | 0.46 |
| P22136   | ATPase expression protein 2, mitochondrial [OS=Saccharomyces cerevisiae S288c]                           | 85532<br>5 | AEP2;<br>YMR282<br>C    | metabolic process;regulation of biological process                                                       | mitochondrion                                         | RNA binding                                                             | 0.359 | 0.166 | 0.46 |
| Q06630   | Mitochondrial homologous recombination protein 1 [OS=Saccharomyces cerevisiae S288c]                     | 85189<br>0 | MHR1;<br>YDR296<br>W    | cell organization and biogenesis;metabolic process;regulation of biological process;response to stimulus | mitochondrion;nucleus                                 | catalytic activity;DNA binding;structural molecule activity             | 0.359 | 0.166 | 0.46 |
| P36516   | 54S ribosomal protein L3, mitochondrial [OS=Saccharomyces cerevisiae S288c]                              | 85503<br>9 | MRPL3;<br>YMR024<br>W   | cell organization and biogenesis;metabolic process;response to stimulus                                  | mitochondrion;nucleus;ribosome                        | catalytic activity;RNA binding;structural molecule activity             | 1.043 | 0.487 | 0.47 |
| P38297   | Mitofusin FZO1 [OS=Saccharomyces cerevisiae S288c]                                                       | 85247<br>7 | FZO1;<br>YBR179C        | cell organization and biogenesis                                                                         | membrane;mitochondrion                                | catalytic activity;nucleotide binding;protein binding                   | 0.304 | 0.142 | 0.47 |
| Q06089   | Uncharacterized mitochondrial outer membrane protein YPR098C [OS=Saccharomyces cerevisiae S288c]         | 85621<br>3 | YPR098C<br>;<br>YPR098C |                                                                                                          | membrane;mitochondrion                                |                                                                         | 4.623 | 2.162 | 0.47 |
| Q07500   | External NADH-ubiquinone oxidoreductase 2, mitochondrial [OS=Saccharomyces cerevisiae S288c]             | 85147<br>4 | NDE2;<br>YDL085<br>W    | metabolic process                                                                                        | mitochondrion                                         | catalytic activity;nucleotide binding                                   | 6.356 | 2.981 | 0.47 |
| P25270   | rRNA methyltransferase 1, mitochondrial [OS=Saccharomyces cerevisiae S288c]                              | 85437<br>6 | MRM1;<br>YOR201<br>C    | metabolic process                                                                                        | mitochondrion                                         | catalytic activity;RNA binding                                          | 0.274 | 0.129 | 0.47 |
| P38122   | 3-methyl-2-oxobutanoate hydroxymethyltransferase [OS=Saccharomyces cerevisiae S288c]                     | 85247<br>4 | ECM31;<br>YBR176<br>W   | metabolic process                                                                                        | mitochondrion                                         | catalytic activity                                                      | 0.259 | 0.122 | 0.47 |
| P36008   | Elongation factor 1-gamma 2 [OS=Saccharomyces cerevisiae S288c]                                          | 85378<br>1 | TEF4;<br>YKL081<br>W    | metabolic process;regulation of biological process                                                       | cytoplasm;mitochondrion;nucleus;ribosome              | catalytic activity;protein binding;RNA binding                          | 0.202 | 0.096 | 0.48 |
| P47039   | Probable kynurenine--oxoglutarate transaminase BNA3 [OS=Saccharomyces cerevisiae S288c]                  | 85338<br>6 | BNA3;<br>YJL060W        | metabolic process;regulation of biological process                                                       | cytoplasm;mitochondrion                               | catalytic activity                                                      | 0.212 | 0.101 | 0.48 |
| Q03430   | 37S ribosomal protein RSM28, mitochondrial [OS=Saccharomyces cerevisiae S288c]                           | 85210<br>5 | RSM28;<br>YDR494<br>W   | cell organization and biogenesis;metabolic process                                                       | mitochondrion;ribosome                                | structural molecule activity                                            | 3.062 | 1.462 | 0.48 |
| P00359   | Glyceraldehyde-3-phosphate dehydrogenase 3 [OS=Saccharomyces cerevisiae S288c]                           | 85310<br>6 | TDH3;<br>YGR192<br>C    | cell death;metabolic process                                                                             | cytoplasm;cytosol;membrane;mitochondrion ;nucleus     | catalytic activity;nucleotide binding;RNA binding                       | 6.406 | 3.062 | 0.48 |
| P40165   | NAD(P)H-hydrate epimerase [OS=Saccharomyces cerevisiae S288c]                                            | 85552<br>1 | YNL200C<br>;<br>YNL200C | metabolic process                                                                                        | cytoplasm;mitochondrion                               | catalytic activity;metal ion binding;nucleotide binding                 | 1.61  | 0.778 | 0.48 |
| P32048   | Lysine--tRNA ligase, mitochondrial [OS=Saccharomyces cerevisiae S288c]                                   | 85565<br>1 | MSK1;<br>YNL073<br>W    | cell organization and biogenesis;metabolic process;transport                                             | cytoplasm;mitochondrion;organelle lumen               | catalytic activity;nucleotide binding;RNA binding                       | 0.122 | 0.059 | 0.48 |
| P39925   | Mitochondrial respiratory chain complexes assembly protein AFG3 [OS=Saccharomyces cerevisiae S288c]      | 85673<br>7 | AFG3;<br>YER017C        | cell organization and biogenesis;metabolic process;response to stimulus;transport                        | membrane;mitochondrion                                | catalytic activity;metal ion binding;nucleotide binding;protein binding | 1.015 | 0.492 | 0.48 |
| Q12480   | Probable electron transfer flavoprotein subunit alpha, mitochondrial [OS=Saccharomyces cerevisiae S288c] | 85611<br>2 | AIM45;<br>YPR004C       | metabolic process;transport                                                                              | mitochondrion;organelle lumen                         | catalytic activity;nucleotide binding                                   | 2.548 | 1.239 | 0.49 |
| Q04458   | Fatty aldehyde dehydrogenase HFD1 [OS=Saccharomyces cerevisiae S288c]                                    | 85513<br>7 | HFD1;<br>YMR110<br>C    | metabolic process                                                                                        | endoplasmic reticulum;endosome;membrane;mitochondrion | catalytic activity                                                      | 3.642 | 1.783 | 0.49 |
| P06208-1 | 2-isopropylmalate synthase [OS=Saccharomyces cerevisiae S288c]                                           | 85561<br>9 | LEU4;<br>YNL104C        | metabolic process                                                                                        | cytoplasm;mitochondrion                               | catalytic activity;protein binding                                      | 4.223 | 2.07  | 0.49 |
| P00175   | Cytochrome b2, mitochondrial [OS=Saccharomyces cerevisiae S288c]                                         | 85495<br>0 | CYB2;<br>YML054<br>C    | metabolic process;transport                                                                              | cytosol;membrane;mitochondrion;nucleus                | catalytic activity;metal ion binding;nucleotide binding                 | 0.679 | 0.334 | 0.49 |
| P00358   | glyceraldehyde-3-phosphate dehydrogenase 2 [OS=Saccharomyces cerevisiae S288c]                           | 85346<br>5 | TDH2;<br>YJR009C        | cell death;metabolic process                                                                             | cytoplasm;cytosol;membrane;mitochondrion ;nucleus     | catalytic activity;nucleotide binding;protein binding                   | 3.489 | 1.721 | 0.49 |

|        |                                                                                                            |        |                       |                                                                                               |                                                |                                                                                 |        |        |      |
|--------|------------------------------------------------------------------------------------------------------------|--------|-----------------------|-----------------------------------------------------------------------------------------------|------------------------------------------------|---------------------------------------------------------------------------------|--------|--------|------|
| P49095 | Glycine dehydrogenase (Decarboxylating), mitochondrial [OS=Saccharomyces cerevisiae S288c]                 | 855227 | GCV2; YMR189W         | metabolic process                                                                             | cytosol;mitochondrion                          | catalytic activity                                                              | 1.575  | 0.778  | 0.49 |
| P32787 | Mitochondrial genome maintenance protein MGM101 [OS=Saccharomyces cerevisiae S288c]                        | 853609 | MGM101; YJR144W       | cell organization and biogenesis;metabolic process;response to stimulus                       | chromosome;mitochondrion                       | DNA binding                                                                     | 3.281  | 1.637  | 0.50 |
| P07806 | Valine--tRNA ligase, mitochondrial [OS=Saccharomyces cerevisiae S288c]                                     | 852986 | VAS1; YGR094W         | metabolic process;regulation of biological process                                            | cytoplasm;cytosol;mitochondrion                | catalytic activity;nucleotide binding                                           | 0.668  | 0.334  | 0.50 |
| P36517 | 54S ribosomal protein L4, mitochondrial [OS=Saccharomyces cerevisiae S288c]                                | 851160 | MRPL4; YLR439W        | cell organization and biogenesis;metabolic process                                            | mitochondrion;ribosome                         | structural molecule activity                                                    | 2.162  | 1.081  | 0.50 |
| P53170 | [Pyruvate dehydrogenase (acetyl-transferring)] kinase 2, mitochondrial [OS=Saccharomyces cerevisiae S288c] | 852821 | PKP2; YGL059W         | metabolic process;regulation of biological process                                            | mitochondrion;organelle lumen                  | catalytic activity;nucleotide binding;protein binding                           | 0.778  | 0.389  | 0.50 |
| P28817 | 3-hydroxyisobutyryl-CoA hydrolase, mitochondrial [OS=Saccharomyces cerevisiae S288c]                       | 851606 | EHD3; YDR036C         | metabolic process                                                                             | mitochondrion                                  | catalytic activity                                                              | 0.743  | 0.374  | 0.50 |
| P23180 | Probable oxidoreductase AIM17 [OS=Saccharomyces cerevisiae S288c]                                          | 856365 | AIM17; YHL021C        | cell organization and biogenesis;metabolic process                                            | mitochondrion                                  | catalytic activity;metal ion binding                                            | 2.981  | 1.512  | 0.51 |
| Q08023 | Protein FMP25, mitochondrial [OS=Saccharomyces cerevisiae S288c]                                           | 850766 | FMP25; YLR077W        | cell organization and biogenesis                                                              | membrane;mitochondrion                         |                                                                                 | 1.412  | 0.719  | 0.51 |
| P36066 | Protein MRG3-like [OS=Saccharomyces cerevisiae S288c]                                                      | 853725 | YKL133C ; YKL133C     | metabolic process                                                                             | membrane;mitochondrion                         | protein binding                                                                 | 1.054  | 0.54   | 0.51 |
| Q06668 | Methyltransferase OMS1, mitochondrial [OS=Saccharomyces cerevisiae S288c]                                  | 851911 | OMS1; YDR316W         | metabolic process                                                                             | membrane;mitochondrion                         | catalytic activity                                                              | 0.585  | 0.301  | 0.51 |
| P04037 | cytochrome c oxidase subunit 4, mitochondrial [OS=Saccharomyces cerevisiae S288c]                          | 852688 | COX4; YGL187C         | cell organization and biogenesis;metabolic process;transport                                  | membrane;mitochondrion                         | catalytic activity;metal ion binding;transporter activity                       | 27.48  | 14.199 | 0.52 |
| P40053 | Altered inheritance of mitochondria protein 9, mitochondrial [OS=Saccharomyces cerevisiae S288c]           | 856813 | AIM9; YER080W         |                                                                                               | mitochondrion                                  |                                                                                 | 4.036  | 2.086  | 0.52 |
| P50945 | MICOS complex subunit MIC27 [OS=Saccharomyces cerevisiae S288c]                                            | 855623 | AIM37; MIC27; YNL100W | cell organization and biogenesis                                                              | membrane;mitochondrion                         |                                                                                 | 0.968  | 0.501  | 0.52 |
| P51998 | 54S ribosomal protein yml6, mitochondrial [OS=Saccharomyces cerevisiae S288c]                              | 854983 | YML6; YML025C         | cell organization and biogenesis;metabolic process                                            | mitochondrion;ribosome                         | RNA binding;structural molecule activity                                        | 1.404  | 0.73   | 0.52 |
| Q12230 | Sphingolipid long chain base-responsive protein LSP1 [OS=Saccharomyces cerevisiae S288c]                   | 856103 | LSP1; YPL004C         | regulation of biological process;response to stimulus;transport                               | cytoplasm;membrane;mitochondrion               |                                                                                 | 24.119 | 12.594 | 0.52 |
| P43617 | Uncharacterized mitochondrial carrier YFR045W [OS=Saccharomyces cerevisiae S288c]                          | 850606 | YFR045W; YFR045W      | metabolic process;transport                                                                   | membrane;mitochondrion                         | structural molecule activity;transporter activity                               | 0.778  | 0.413  | 0.53 |
| P36520 | 54S ribosomal protein L10, mitochondrial [OS=Saccharomyces cerevisiae S288c]                               | 855436 | MRPL10; YNL284C       | cell organization and biogenesis;metabolic process                                            | mitochondrion;ribosome                         | structural molecule activity                                                    | 0.73   | 0.389  | 0.53 |
| P53736 | Uncharacterized protein YNR040W [OS=Saccharomyces cerevisiae S288c]                                        | 855776 | YNR040W; YNR040W      |                                                                                               | mitochondrion                                  |                                                                                 | 0.73   | 0.389  | 0.53 |
| P53305 | Mitochondrial 37S ribosomal protein S27 [OS=Saccharomyces cerevisiae S288c]                                | 853129 | RSM27; YGR215W        | cell organization and biogenesis;metabolic process                                            | mitochondrion;ribosome                         | structural molecule activity                                                    | 2.162  | 1.154  | 0.53 |
| Q04935 | Cytochrome c oxidase protein 20, mitochondrial [OS=Saccharomyces cerevisiae S288c]                         | 851817 | COX20; YDR231C        | cell organization and biogenesis;metabolic process                                            | membrane;mitochondrion                         | protein binding                                                                 | 1.894  | 1.031  | 0.54 |
| P32891 | D-lactate dehydrogenase [cytochrome] 1, mitochondrial [OS=Saccharomyces cerevisiae S288c]                  | 851380 | DLD1; YDL174C         | metabolic process;transport                                                                   | membrane;mitochondrion                         | catalytic activity;nucleotide binding                                           | 11.253 | 6.128  | 0.54 |
| POCS90 | Heat shock protein SSC1, mitochondrial [OS=Saccharomyces cerevisiae S288c]                                 | 853503 | SSC1; YJR045C         | cell organization and biogenesis;metabolic process;regulation of biological process;transport | membrane;mitochondrion;nucleus;organelle lumen | catalytic activity;enzyme regulator activity;nucleotide binding;protein binding | 26.826 | 14.647 | 0.55 |
| P39522 | Dihydroxy-acid dehydratase, mitochondrial [OS=Saccharomyces cerevisiae S288c]                              | 853473 | ILV3; YJR016C         | metabolic process                                                                             | mitochondrion                                  | catalytic activity;metal ion binding                                            | 16.475 | 9      | 0.55 |

|        |                                                                                                                |            |                                      |                                                                                      |                                         |                                                                                     |            |            |      |
|--------|----------------------------------------------------------------------------------------------------------------|------------|--------------------------------------|--------------------------------------------------------------------------------------|-----------------------------------------|-------------------------------------------------------------------------------------|------------|------------|------|
|        | S288c]                                                                                                         |            |                                      |                                                                                      |                                         |                                                                                     |            |            |      |
| P38071 | Enoyl-[acyl-carrier protein] reductase [NADPH, B-specific], mitochondrial [OS=Saccharomyces cerevisiae S288c]  | 85231<br>4 | ETR1;<br>YBR026C                     | metabolic process                                                                    | mitochondrion;organelle lumen           | catalytic activity;DNA binding;metal ion binding                                    | 9          | 4.926      | 0.55 |
| P43616 | Cys-Gly metalloprotease dug1 [OS=Saccharomyces cerevisiae S288c]                                               | 85060<br>5 | DUG1;<br>YFR044C                     | metabolic process                                                                    | cytoplasm;mitochondrion;ribosome        | catalytic;metal ion binding                                                         | 0.848      | 0.468      | 0.55 |
| P39006 | Phosphatidylserine decarboxylase proenzyme 1, mitochondrial [OS=Saccharomyces cerevisiae S288c]                | 85555<br>2 | PSD1;<br>YNL169C                     | metabolic process;regulation of biological process                                   | membrane;mitochondrion                  | catalytic activity                                                                  | 0.487      | 0.269      | 0.55 |
| P32860 | NifU-like protein, mitochondrial [OS=Saccharomyces cerevisiae S288c]                                           | 85382<br>6 | NFU1;<br>YKL040C                     | cell organization and biogenesis;cellular homeostasis;metabolic process              | mitochondrion;organelle lumen           | metal ion binding                                                                   | 3.87       | 2.162      | 0.56 |
| Q05892 | MIOREX complex component 2 [OS=Saccharomyces cerevisiae S288c]                                                 | 85099<br>7 | YLR290C<br>;<br>COQ11;<br>YLR290C    | metabolic process                                                                    | mitochondrion                           | catalytic activity                                                                  | 3.87       | 2.162      | 0.56 |
| Q04472 | Mitochondrial inner membrane i-AAA protease supercomplex subunit MGR3 [OS=Saccharomyces cerevisiae S288c]      | 85514<br>2 | MGR3;<br>YMR115<br>W                 | metabolic process                                                                    | membrane;mitochondrion                  | protein binding                                                                     | 0.417      | 0.233      | 0.56 |
| P47052 | succinate dehydrogenase [ubiquinone] flavoprotein subunit 2, mitochondrial [OS=Saccharomyces cerevisiae S288c] | 85340<br>5 | YJL045W<br>;<br>YJL045W              | metabolic process;transport                                                          | membrane;mitochondrion                  | catalytic activity;nucleotide binding                                               | 4.043      | 2.262      | 0.56 |
| P28241 | Isocitrate dehydrogenase [NAD] subunit 2, mitochondrial [OS=Saccharomyces cerevisiae S288c]                    | 85430<br>3 | IDH2;<br>YOR136<br>W                 | metabolic process                                                                    | mitochondrion;organelle lumen           | catalytic activity;metal ion binding;nucleotide binding;protein binding;RNA binding | 4.179      | 2.34       | 0.56 |
| Q06567 | ABC1 family protein MCP2 [OS=Saccharomyces cerevisiae S288c]                                                   | 85095<br>5 | YLR253<br>W;<br>MCP2;<br>YLR253<br>W | cell organization and biogenesis                                                     | membrane;mitochondrion                  |                                                                                     | 0.389      | 0.218      | 0.56 |
| Q12374 | Nuclear control of ATPase protein 2 [OS=Saccharomyces cerevisiae S288c]                                        | 85627<br>8 | NCA2;<br>YPR155C                     | metabolic process                                                                    | membrane;mitochondrion                  |                                                                                     | 0.668      | 0.377      | 0.56 |
| P24720 | Protein MNE1 [OS=Saccharomyces cerevisiae S288c]                                                               | 85453<br>2 | MNE1;<br>YOR350<br>C                 | metabolic process                                                                    | cytoplasm;mitochondrion;organelle lumen |                                                                                     | 0.343      | 0.194      | 0.57 |
| Q12233 | ATP synthase subunit g, mitochondrial [OS=Saccharomyces cerevisiae S288c]                                      | 85613<br>1 | ATP20;<br>YPR020<br>W                | cell organization and biogenesis;metabolic process;transport                         | membrane;mitochondrion                  | catalytic activity;transporter activity                                             | 1.371      | 0.778      | 0.57 |
| Q12165 | ATP synthase subunit delta, mitochondrial [OS=Saccharomyces cerevisiae S288c]                                  | 85156<br>0 | ATP16;<br>YDL004<br>W                | metabolic process;transport                                                          | membrane;mitochondrion                  | catalytic activity;transporter activity                                             | 1.371      | 0.778      | 0.57 |
| P53326 | Uncharacterized protein YGR266W [OS=Saccharomyces cerevisiae S288c]                                            | 85318<br>2 | YGR266<br>W;<br>YGR266<br>W          |                                                                                      | membrane;mitochondrion                  |                                                                                     | 0.778      | 0.442      | 0.57 |
| P00830 | ATP synthase subunit beta, mitochondrial [OS=Saccharomyces cerevisiae S288c]                                   | 85358<br>5 | ATP2;<br>YJR121<br>W                 | metabolic process;transport                                                          | cytosol;membrane;mitochondrion          | catalytic activity;nucleotide binding;protein binding;transporter activity          | 38.81<br>1 | 22.26<br>3 | 0.57 |
| P27929 | 37S ribosomal protein NAM9, mitochondrial [OS=Saccharomyces cerevisiae S288c]                                  | 85558<br>5 | NAM9;<br>YNL137C                     | cell organization and biogenesis;metabolic process;regulation of biological process  | mitochondrion;ribosome                  | RNA binding;structural molecule activity                                            | 1.202      | 0.693      | 0.58 |
| P32316 | acetyl-CoA hydrolase [OS=Saccharomyces cerevisiae S288c]                                                       | 85226<br>6 | ACH1;<br>YBL015<br>W                 | metabolic process                                                                    | cytoplasm;cytosol;mitochondrion         | catalytic activity                                                                  | 10.49<br>8 | 6.055      | 0.58 |
| P23833 | Protein SCO1, mitochondrial [OS=Saccharomyces cerevisiae S288c]                                                | 85232<br>5 | SCO1;<br>YBR037C                     | cell organization and biogenesis;cellular homeostasis;response to stimulus;transport | membrane;mitochondrion                  | antioxidant activity;catalytic activity;metal ion binding                           | 1.154      | 0.668      | 0.58 |
| P36531 | 54S ribosomal protein L36, mitochondrial [OS=Saccharomyces cerevisiae S288c]                                   | 85241<br>9 | MRPL36;<br>YBR122C                   | cell organization and biogenesis;metabolic process                                   | mitochondrion;ribosome                  | structural molecule activity                                                        | 1.154      | 0.668      | 0.58 |
| P53732 | 37S ribosomal protein S12, mitochondrial [OS=Saccharomyces cerevisiae S288c]                                   | 85577<br>2 | MRPS12<br>;<br>YNR036<br>C           | cell organization and biogenesis;metabolic process                                   | mitochondrion;ribosome                  | structural molecule activity                                                        | 1.154      | 0.668      | 0.58 |
| P16622 | Ferrochelatase, mitochondrial [OS=Saccharomyces cerevisiae S288c]                                              | 85434<br>7 | HEM15;<br>YOR176<br>W                | metabolic process                                                                    | membrane;mitochondrion                  | catalytic activity                                                                  | 4.337      | 2.511      | 0.58 |
| P18239 | ADP,ATP carrier protein 2 [OS=Saccharomyces cerevisiae S288c]                                                  | 85225<br>0 | PET9;<br>YBL030C                     | cell death;metabolic process;transport                                               | membrane;mitochondrion                  | structural molecule activity;transporter activity                                   | 47.06<br>4 | 27.48      | 0.58 |

|        |                                                                                                              |        |                        |                                                                                                                           |                                              |                                                             |        |       |      |
|--------|--------------------------------------------------------------------------------------------------------------|--------|------------------------|---------------------------------------------------------------------------------------------------------------------------|----------------------------------------------|-------------------------------------------------------------|--------|-------|------|
| Q00402 | Nuclear migration protein NUM1 [OS=Saccharomyces cerevisiae S288c]                                           | 851727 | NUM1; YDR150W          | cell organization and biogenesis;cellular component movement;metabolic process;regulation of biological process;transport | endoplasmic reticulum;mitochondrion          | catalytic activity;motor activity;protein binding           | 0.065  | 0.038 | 0.58 |
| P12687 | 54S ribosomal protein L2, mitochondrial [OS=Saccharomyces cerevisiae S288c]                                  | 855727 | MRP7; YNL005C          | cell organization and biogenesis;metabolic process                                                                        | mitochondrion;ribosome                       | catalytic activity;RNA binding;structural molecule activity | 1.848  | 1.081 | 0.58 |
| P36112 | MICOS complex subunit Mic60 [OS=Saccharomyces cerevisiae S288c]                                              | 853886 | FCJ1; MIC60; YKR016W   | cell organization and biogenesis;transport                                                                                | membrane;mitochondrion                       |                                                             | 15.379 | 9     | 0.59 |
| P15424 | ATP-dependent RNA helicase MSS116, mitochondrial [OS=Saccharomyces cerevisiae S288c]                         | 851775 | MSS116; YDR194C        | metabolic process;regulation of biological process                                                                        | mitochondrion;organelle lumen                | catalytic activity;nucleotide binding;RNA binding           | 1.783  | 1.047 | 0.59 |
| P53724 | 54S ribosomal protein L50, mitochondrial [OS=Saccharomyces cerevisiae S288c]                                 | 855756 | MRPL50; YNR022C        | cell organization and biogenesis;metabolic process                                                                        | mitochondrion;ribosome                       | structural molecule activity                                | 0.995  | 0.585 | 0.59 |
| P17695 | Glutaredoxin-2, mitochondrial [OS=Saccharomyces cerevisiae S288c]                                            | 852124 | GRX2; YDR513W          | cellular homeostasis;metabolic process;regulation of biological process;response to stimulus;transport                    | cytoplasm;cytosol;mitochondrion;nucleus      | antioxidant activity;catalytic activity                     | 0.874  | 0.52  | 0.59 |
| P14832 | peptidyl-prolyl cis-trans isomerase [OS=Saccharomyces cerevisiae S288c]                                      | 851733 | CPR1; YDR155C          | cell differentiation;cell organization and biogenesis;metabolic process;regulation of biological process;transport        | cytoplasm;mitochondrion;nucleus              | catalytic activity;RNA binding                              | 0.874  | 0.52  | 0.59 |
| Q08742 | Thiosulfate sulfurtransferase RDL2, mitochondrial [OS=Saccharomyces cerevisiae S288c]                        | 854460 | RDL2; YOR286W          |                                                                                                                           | mitochondrion                                | catalytic activity                                          | 0.874  | 0.52  | 0.59 |
| Q00711 | Succinate dehydrogenase [ubiquinone] flavoprotein subunit, mitochondrial [OS=Saccharomyces cerevisiae S288c] | 853709 | SDH1; YKL148C          | metabolic process;transport                                                                                               | membrane;mitochondrion                       | catalytic activity;nucleotide binding;protein binding       | 8.454  | 5.032 | 0.60 |
| P36101 | tRNA threonylcarbamoyladenine dehydratase 2 [OS=Saccharomyces cerevisiae S288c]                              | 853841 | TCD2; YKL027W; YKL027W | metabolic process                                                                                                         | cytosol;membrane;mitochondrion               | catalytic activity;nucleotide binding                       | 0.778  | 0.468 | 0.60 |
| Q03020 | iron sulfur cluster assembly protein 1, mitochondrial [OS=Saccharomyces cerevisiae S288c]                    | 855968 | ISU1; YPL135W          | cell organization and biogenesis;cellular homeostasis;metabolic process                                                   | cytoplasm;mitochondrion;organelle lumen      | catalytic activity;metal ion binding;protein binding        | 0.778  | 0.468 | 0.60 |
| P25642 | 54S ribosomal protein IMG2, mitochondrial [OS=Saccharomyces cerevisiae S288c]                                | 850434 | IMG2; YCR071C          | cell organization and biogenesis;metabolic process                                                                        | mitochondrion;ribosome                       | structural molecule activity                                | 0.778  | 0.468 | 0.60 |
| P25087 | Sterol 24-C-methyltransferase [OS=Saccharomyces cerevisiae S288c]                                            | 855003 | ERG6; YML008C          | metabolic process                                                                                                         | endoplasmic reticulum;membrane;mitochondrion | catalytic activity                                          | 1.424  | 0.859 | 0.60 |
| P38825 | Protein TOM71 [OS=Saccharomyces cerevisiae S288c]                                                            | 856517 | TOM71; YHR117W         | transport                                                                                                                 | membrane;mitochondrion                       | protein binding;transporter activity                        | 0.701  | 0.425 | 0.61 |
| P53206 | putative cysteine synthase [OS=Saccharomyces cerevisiae S288c]                                               | 852895 | YGR012W; YGR012W       | metabolic process                                                                                                         |                                              | catalytic activity                                          | 1.346  | 0.817 | 0.61 |
| P32843 | Mitochondrial escape protein 2 [OS=Saccharomyces cerevisiae S288c]                                           | 855348 | YME2; YMR302C          | cell organization and biogenesis;metabolic process                                                                        | membrane;mitochondrion                       | nucleotide binding;RNA binding                              | 3.458  | 2.099 | 0.61 |
| P38891 | Branched-chain-amino-acid aminotransferase, mitochondrial [OS=Saccharomyces cerevisiae S288c]                | 856615 | BAT1; YHR208W          | metabolic process;regulation of biological process;response to stimulus                                                   | mitochondrion;organelle lumen                | catalytic activity                                          | 7.111  | 4.337 | 0.61 |
| P33416 | Heat shock protein 78, mitochondrial [OS=Saccharomyces cerevisiae S288c]                                     | 851845 | HSP78; YDR258C         | cell organization and biogenesis;metabolic process;regulation of biological process;response to stimulus                  | mitochondrion;organelle lumen                | catalytic activity;nucleotide binding;protein binding       | 4.264  | 2.609 | 0.61 |
| Q02776 | Mitochondrial import inner membrane translocase subunit TIM50 [OS=Saccharomyces cerevisiae S288c]            | 856042 | TIM50; YPL063W         | cell organization and biogenesis;metabolic process;transport                                                              | membrane;mitochondrion                       | catalytic activity;protein binding;transporter activity     | 7.483  | 4.623 | 0.62 |
| Q12375 | mitochondrial ornithine transporter 1 [OS=Saccharomyces cerevisiae S288c]                                    | 854297 | ORT1; YOR130C          | metabolic process;transport                                                                                               | membrane;mitochondrion                       | structural molecule activity;transporter activity           | 0.54   | 0.334 | 0.62 |
| P14693 | sorting assembly machinery 35 kDa subunit [OS=Saccharomyces cerevisiae S288c]                                | 856483 | SAM35; YHR083W         | cell organization and biogenesis;transport                                                                                | membrane;mitochondrion                       | protein binding                                             | 0.54   | 0.334 | 0.62 |
| P31334 | 54S ribosomal protein L9, mitochondrial [OS=Saccharomyces cerevisiae S288c]                                  | 853135 | MRPL9; YGR220C         | cell organization and biogenesis;metabolic process                                                                        | mitochondrion;ribosome                       | structural molecule activity                                | 0.501  | 0.311 | 0.62 |

|          |                                                                                                                                               |        |                   |                                                                                                  |                                                 |                                                       |        |       |      |
|----------|-----------------------------------------------------------------------------------------------------------------------------------------------|--------|-------------------|--------------------------------------------------------------------------------------------------|-------------------------------------------------|-------------------------------------------------------|--------|-------|------|
| Q12428   | Probable 2-methylcitrate dehydratase [OS=Saccharomyces cerevisiae S288c]                                                                      | 856108 | PDH1; YPR002W     | metabolic process                                                                                | cytoplasm;membrane;mitochondrion                | catalytic activity                                    | 12.335 | 7.66  | 0.62 |
| P00890   | citrate synthase, mitochondrial [OS=Saccharomyces cerevisiae S288c]                                                                           | 855732 | CIT1; YNR001C     | metabolic process;transport                                                                      | cytosol;mitochondrion;organelle lumen           | catalytic activity                                    | 8.211  | 5.105 | 0.62 |
| P32191   | Glycerol-3-phosphate dehydrogenase, mitochondrial [OS=Saccharomyces cerevisiae S288c]                                                         | 854651 | GUT2; YIL155C     | metabolic process                                                                                | membrane;mitochondrion                          | catalytic activity                                    | 6.097  | 3.796 | 0.62 |
| P38271   | Protein OPY1 [OS=Saccharomyces cerevisiae S288c]                                                                                              | 852426 | OPY1; YBR129C     |                                                                                                  | cytoplasm;mitochondrion                         |                                                       | 0.438  | 0.274 | 0.63 |
| P49954   | probable hydrolase NIT3 [OS=Saccharomyces cerevisiae S288c]                                                                                   | 851065 | NIT3; YLR351C     | metabolic process                                                                                | cytoplasm;mitochondrion                         | catalytic activity                                    | 0.438  | 0.274 | 0.63 |
| P42900   | Sigma-like sequence protein 1, mitochondrial [OS=Saccharomyces cerevisiae S288c]                                                              | 850830 | SLS1; YLR139C     | cell organization and biogenesis;metabolic process                                               | membrane;mitochondrion                          | protein binding                                       | 0.425  | 0.266 | 0.63 |
| P25719   | Peptidyl-prolyl cis-trans isomerase C, mitochondrial [OS=Saccharomyces cerevisiae S288c]                                                      | 854897 | CPR3; YML078W     | cell death;metabolic process                                                                     | mitochondrion;organelle lumen                   | catalytic activity                                    | 2.415  | 1.512 | 0.63 |
| P25349   | Flavoprotein-like protein YCP4 [OS=Saccharomyces cerevisiae S288c]                                                                            | 850360 | YCP4; YCR004C     | metabolic process;regulation of biological process                                               | cytoplasm;membrane;mitochondrion                | catalytic activity;nucleotide binding;protein binding | 5.813  | 3.642 | 0.63 |
| Q02981   | ABC1 family protein YPL109C, mitochondrial [OS=Saccharomyces cerevisiae S288c]                                                                | 855995 | YPL109C ; YPL109C |                                                                                                  | mitochondrion                                   |                                                       | 0.413  | 0.259 | 0.63 |
| P28239   | Inorganic pyrophosphatase, mitochondrial [OS=Saccharomyces cerevisiae S288c]                                                                  | 855309 | PPA2; YMR267W     | metabolic process                                                                                | cytoplasm;mitochondrion                         | catalytic activity;metal ion binding                  | 0.413  | 0.259 | 0.63 |
| P48015   | Aminomethyltransferase, mitochondrial [OS=Saccharomyces cerevisiae S288c]                                                                     | 851582 | GCV1; YDR019C     | metabolic process                                                                                | mitochondrion                                   | catalytic activity;protein binding                    | 8.047  | 5.062 | 0.63 |
| P49017   | 2-methoxy-6-polyprenyl-1,4-benzoquinol methylase, mitochondrial [OS=Saccharomyces cerevisiae S288c]                                           | 854930 | COQ5; YML110C     | metabolic process                                                                                | membrane;mitochondrion;organelle lumen          | catalytic activity                                    | 0.389  | 0.245 | 0.63 |
| P43635   | Citrate synthase 3, mitochondrial [OS=Saccharomyces cerevisiae S288c]                                                                         | 856107 | CIT3; YPR001W     | metabolic process                                                                                | mitochondrion                                   | catalytic activity                                    | 3.642  | 2.3   | 0.63 |
| P47127   | Altered inheritance of mitochondria protein 24, mitochondrial [OS=Saccharomyces cerevisiae S288c]                                             | 853543 | AIM24; YJR080C    | cell organization and biogenesis                                                                 | mitochondrion                                   |                                                       | 2.857  | 1.807 | 0.63 |
| P08417   | fumarate hydratase, mitochondrial [OS=Saccharomyces cerevisiae S288c]                                                                         | 855866 | FUM1; YPL262W     | cell organization and biogenesis;metabolic process                                               | cytoplasm;cytosol;mitochondrion;organelle lumen | catalytic activity                                    | 8.237  | 5.21  | 0.63 |
| P43567   | alanine-glyoxylate aminotransferase 1 [OS=Saccharomyces cerevisiae S288c]                                                                     | 850514 | AGX1; YFL030W     | metabolic process                                                                                | cytosol;mitochondrion                           | catalytic activity                                    | 2.162  | 1.371 | 0.63 |
| P53252   | sphingolipid long chain base-responsive protein PIL1 [OS=Saccharomyces cerevisiae S288c]                                                      | 852977 | PIL1; YGR086C     | cell organization and biogenesis;regulation of biological process;response to stimulus;transport | cytoplasm;membrane;mitochondrion                | protein binding                                       | 10.45  | 6.627 | 0.63 |
| P34227   | Mitochondrial peroxiredoxin PRX1 [OS=Saccharomyces cerevisiae S288c]                                                                          | 852215 | PRX1; YBL064C     | cellular homeostasis;metabolic process;regulation of biological process;response to stimulus     | mitochondrion                                   | antioxidant activity;catalytic activity               | 5.158  | 3.281 | 0.64 |
| P40961   | prohibitin-1 [OS=Saccharomyces cerevisiae S288c]                                                                                              | 853033 | PHB1; YGR132C     | cell organization and biogenesis;metabolic process;regulation of biological process              | membrane;mitochondrion                          | protein binding                                       | 5.158  | 3.281 | 0.64 |
| P20967   | 2-oxoglutarate dehydrogenase, mitochondrial [OS=Saccharomyces cerevisiae S288c]                                                               | 854681 | KGD1; YIL125W     | metabolic process                                                                                | cytosol;mitochondrion;organelle lumen           | catalytic activity                                    | 8.168  | 5.201 | 0.64 |
| P12695   | Dihydropolypyllysine-residue acetyltransferase component of pyruvate dehydrogenase complex, mitochondrial [OS=Saccharomyces cerevisiae S288c] | 855653 | LAT1; YNL071W     | metabolic process                                                                                | mitochondrion;organelle lumen                   | catalytic activity                                    | 5.898  | 3.758 | 0.64 |
| Q01532-1 | Cysteine proteinase 1, mitochondrial [OS=Saccharomyces cerevisiae S288c]                                                                      |        |                   | metabolic process;regulation of biological process;response to stimulus                          | cytoplasm;mitochondrion                         | catalytic activity;DNA binding;RNA binding            | 0.28   | 0.179 | 0.64 |
| P40047   | Aldehyde dehydrogenase 5, mitochondrial [OS=Saccharomyces cerevisiae S288c]                                                                   | 856804 | ALD5; YER073W     | metabolic process                                                                                | mitochondrion;organelle lumen                   | catalytic activity                                    | 1.955  | 1.254 | 0.64 |

|        |                                                                                                      |        |                 |                                                                                     |                                                 |                                                                         |        |        |      |
|--------|------------------------------------------------------------------------------------------------------|--------|-----------------|-------------------------------------------------------------------------------------|-------------------------------------------------|-------------------------------------------------------------------------|--------|--------|------|
| P38771 | Ribosome-recycling factor, mitochondrial [OS=Saccharomyces cerevisiae S288c]                         | 856433 | RRF1; YHR038W   | cell organization and biogenesis;metabolic process                                  | mitochondrion                                   | RNA binding                                                             | 1.955  | 1.254  | 0.64 |
| P32445 | Single-stranded DNA-binding protein RIM1, mitochondrial [OS=Saccharomyces cerevisiae S288c]          | 850395 | RIM1; YCR028C-A | cell organization and biogenesis;metabolic process;regulation of biological process | mitochondrion                                   | DNA binding                                                             | 1.783  | 1.154  | 0.65 |
| Q03653 | protein EFR3 [OS=Saccharomyces cerevisiae S288c]                                                     | 852522 | EFR3; YMR212C   |                                                                                     | membrane;mitochondrion                          |                                                                         | 0.148  | 0.096  | 0.65 |
| P09624 | Dihydrolipoyl dehydrogenase, mitochondrial [OS=Saccharomyces cerevisiae S288c]                       | 850527 | LPD1; YFL018C   | cellular homeostasis;metabolic process;regulation of biological process             | mitochondrion;organelle lumen                   | catalytic activity;nucleotide binding                                   | 21.539 | 14.013 | 0.65 |
| P32473 | Pyruvate dehydrogenase E1 component subunit beta, mitochondrial [OS=Saccharomyces cerevisiae S288c]  | 852522 | PDB1; YBR221C   | metabolic process                                                                   | mitochondrion;organelle lumen                   | catalytic activity                                                      | 6.848  | 4.456  | 0.65 |
| P07275 | Delta-1-pyrroline-5-carboxylate dehydrogenase, mitochondrial [OS=Saccharomyces cerevisiae S288c]     | 856432 | PUT2; YHR037W   | metabolic process                                                                   | membrane;mitochondrion;organelle lumen          | catalytic activity                                                      | 5.579  | 3.642  | 0.65 |
| P53140 | Protein RMD9, mitochondrial [OS=Saccharomyces cerevisiae S288c]                                      | 852771 | RMD9; YGL107C   | cell differentiation;metabolic process;regulation of biological process             | membrane;mitochondrion                          | RNA binding                                                             | 1.154  | 0.756  | 0.66 |
| P19414 | Aconitate hydratase, mitochondrial [OS=Saccharomyces cerevisiae S288c]                               | 851013 | ACO1; YLR304C   | cell organization and biogenesis;metabolic process;transport                        | cytoplasm;cytosol;mitochondrion;organelle lumen | catalytic activity;DNA binding;metal ion binding                        | 24.885 | 16.343 | 0.66 |
| P40341 | Mitochondrial respiratory chain complexes assembly protein YTA12 [OS=Saccharomyces cerevisiae S288c] | 855114 | YTA12; YMR089C  | cell organization and biogenesis;metabolic process;response to stimulus;transport   | cytoplasm;membrane;mitochondrion                | catalytic activity;metal ion binding;nucleotide binding;protein binding | 1.184  | 0.778  | 0.66 |
| P32453 | Protein ATP11, mitochondrial [OS=Saccharomyces cerevisiae S288c]                                     | 855401 | ATP11; YNL315C  | cell organization and biogenesis                                                    | mitochondrion                                   | protein binding                                                         | 1.512  | 0.995  | 0.66 |
| P40033 | 37S ribosomal protein rsm18, mitochondrial [OS=Saccharomyces cerevisiae S288c]                       | 856776 | RSM18; YER050C  | cell organization and biogenesis;metabolic process                                  | mitochondrion;ribosome                          | structural molecule activity                                            | 1.512  | 0.995  | 0.66 |
| P36526 | 54S ribosomal protein L27, mitochondrial [OS=Saccharomyces cerevisiae S288c]                         | 852585 | MRPL27; YBR282W | cell organization and biogenesis;metabolic process                                  | mitochondrion;ribosome                          | structural molecule activity                                            | 1.512  | 0.995  | 0.66 |
| P18900 | hexaprenyl pyrophosphate synthase, mitochondrial [OS=Saccharomyces cerevisiae S288c]                 | 852288 | COQ1; YBR003W   | metabolic process                                                                   | membrane;mitochondrion                          | catalytic activity;metal ion binding;protein binding                    | 0.711  | 0.468  | 0.66 |
| P50085 | Prohibitin-2 [OS=Saccharomyces cerevisiae S288c]                                                     | 853146 | PHB2; YGR231C   | cell organization and biogenesis;metabolic process;regulation of biological process | membrane;mitochondrion                          | protein binding                                                         | 3.806  | 2.511  | 0.66 |
| P46367 | Potassium-activated aldehyde dehydrogenase, mitochondrial [OS=Saccharomyces cerevisiae S288c]        | 854556 | ALD4; YOR374W   | metabolic process                                                                   | mitochondrion;organelle lumen                   | catalytic activity                                                      | 24.119 | 15.927 | 0.66 |
| P48527 | Tyrosine-tRNA ligase, mitochondrial [OS=Saccharomyces cerevisiae S288c]                              | 856007 | MSY1; YPL097W   | metabolic process                                                                   | cytoplasm;cytosol;mitochondrion;organelle lumen | catalytic activity;nucleotide binding;RNA binding                       | 0.63   | 0.417  | 0.66 |
| P38323 | ATP-dependent clpX-like chaperone, mitochondrial [OS=Saccharomyces cerevisiae S288c]                 | 852528 | MCX1; YBR227C   | metabolic process                                                                   | membrane;mitochondrion;organelle lumen          | catalytic activity;nucleotide binding                                   | 0.607  | 0.403  | 0.66 |
| P23641 | mitochondrial phosphate carrier protein [OS=Saccharomyces cerevisiae S288c]                          | 853540 | MIR1; YJR077C   | metabolic process;transport                                                         | membrane;mitochondrion                          | protein binding;structural molecule activity;transporter activity       | 20.544 | 13.678 | 0.67 |
| P37292 | Serine hydroxymethyltransferase, mitochondrial [OS=Saccharomyces cerevisiae S288c]                   | 852565 | SHM1; YBR263W   | metabolic process                                                                   | mitochondrion                                   | catalytic activity                                                      | 7.697  | 5.136  | 0.67 |
| P40495 | Homoisocitrate dehydrogenase, mitochondrial [OS=Saccharomyces cerevisiae S288c]                      | 854714 | LYS12; YIL094C  | metabolic process                                                                   | mitochondrion                                   | catalytic activity;metal ion binding;nucleotide binding                 | 3.217  | 2.162  | 0.67 |
| P30902 | ATP synthase subunit d, mitochondrial [OS=Saccharomyces cerevisiae S288c]                            | 853853 | ATP7; YKL016C   | metabolic process;transport                                                         | membrane;mitochondrion                          | catalytic activity;transporter activity                                 | 6.197  | 4.179  | 0.67 |
| P38325 | Mitochondrial outer membrane protein OM14 [OS=Saccharomyces cerevisiae S288c]                        | 852531 | OM14; YBR230C   | transport                                                                           | membrane;mitochondrion                          |                                                                         | 6.197  | 4.179  | 0.67 |
| P07143 | Cytochrome c1, heme protein, mitochondrial [OS=Saccharomyces cerevisiae S288c]                       | 854231 | CYT1; YOR065W   | metabolic process;transport                                                         | cytosol;membrane;mitochondrion                  | metal ion binding                                                       | 13.251 | 9      | 0.68 |



|        |                                                                                                                                                     |        |                      |                                                                                                                               |                                         |                                                                           |       |        |      |
|--------|-----------------------------------------------------------------------------------------------------------------------------------------------------|--------|----------------------|-------------------------------------------------------------------------------------------------------------------------------|-----------------------------------------|---------------------------------------------------------------------------|-------|--------|------|
|        | S288c]                                                                                                                                              |        |                      |                                                                                                                               |                                         |                                                                           |       |        |      |
| P21560 | Protein CBP3, mitochondrial [OS=Saccharomyces cerevisiae S288c]                                                                                     | 855886 | CBP3; YPL215W        | cell organization and biogenesis;regulation of biological process                                                             | membrane;mitochondrion;ribosome         |                                                                           | 1.031 | 0.701  | 0.68 |
| P00560 | Phosphoglycerate kinase [OS=Saccharomyces cerevisiae S288c]                                                                                         | 850370 | PGK1; YCR012W        | metabolic process                                                                                                             | cytoplasm;membrane;mitochondrion        | catalytic activity;nucleotide binding                                     | 4.843 | 3.299  | 0.68 |
| Q08179 | Mitochondrial distribution and morphology protein 38 [OS=Saccharomyces cerevisiae S288c]                                                            | 854130 | MDM38; YOL027C       | cell organization and biogenesis;cellular homeostasis;regulation of biological process;transport                              | membrane;mitochondrion                  |                                                                           | 3.732 | 2.548  | 0.68 |
| P07342 | Acetolactate synthase catalytic subunit, mitochondrial [OS=Saccharomyces cerevisiae S288c]                                                          | 855135 | ILV2; YMR108W        | metabolic process                                                                                                             | mitochondrion                           | catalytic activity;metal ion binding;nucleotide binding                   | 4.223 | 2.888  | 0.68 |
| P17558 | 37S ribosomal protein PET123, mitochondrial [OS=Saccharomyces cerevisiae S288c]                                                                     | 854329 | PET123; YOR158W      | cell organization and biogenesis;metabolic process                                                                            | mitochondrion;ribosome                  | structural molecule activity                                              | 2.594 | 1.783  | 0.69 |
| P38341 | MICOS complex subunit MIC12 [OS=Saccharomyces cerevisiae S288c]                                                                                     | 852566 | AIM5; MIC12; YBR262C | cell organization and biogenesis                                                                                              | membrane;mitochondrion                  |                                                                           | 2.594 | 1.783  | 0.69 |
| Q08822 | Probable electron transfer flavoprotein-ubiquinone oxidoreductase, mitochondrial [OS=Saccharomyces cerevisiae S288c]                                | 854538 | CIR2; YOR356W        | metabolic process;transport                                                                                                   | membrane;mitochondrion                  | catalytic activity;metal ion binding;nucleotide binding                   | 2.162 | 1.488  | 0.69 |
| P06168 | ketol-acid reductoisomerase, mitochondrial [OS=Saccharomyces cerevisiae S288c]                                                                      | 851069 | ILV5; YLR355C        | cell organization and biogenesis;metabolic process                                                                            | mitochondrion                           | catalytic activity;DNA binding;metal ion binding                          | 9     | 6.197  | 0.69 |
| P19262 | Dihydrolipoylysine-residue succinyltransferase component of 2-oxoglutarate dehydrogenase complex, mitochondrial [OS=Saccharomyces cerevisiae S288c] | 851726 | KGD2; YDR148C        | cell organization and biogenesis;metabolic process                                                                            | mitochondrion                           | catalytic activity;protein binding                                        | 5.7   | 3.962  | 0.70 |
| P01120 | Ras-like protein 2 [OS=Saccharomyces cerevisiae S288c]                                                                                              | 855625 | RAS2; YNL098C        | cell communication;cell differentiation;metabolic process;regulation of biological process;response to stimulus;transport     | membrane;mitochondrion;nucleus          | catalytic activity;nucleotide binding;protein binding                     | 5.7   | 3.962  | 0.70 |
| Q06236 | Mitochondrial inner membrane protein SHH4 [OS=Saccharomyces cerevisiae S288c]                                                                       | 850861 | SHH4; YLR164W        | metabolic process                                                                                                             | membrane;mitochondrion                  | catalytic activity;metal ion binding                                      | 4.623 | 3.217  | 0.70 |
| Q02486 | ARS-binding factor 2, mitochondrial [OS=Saccharomyces cerevisiae S288c]                                                                             | 855094 | ABF2; YMR072W        | cell organization and biogenesis;metabolic process;regulation of biological process                                           | chromosome;mitochondrion;nucleus        | DNA binding                                                               | 69.17 | 48.239 | 0.70 |
| P33311 | ATP-dependent permease MDL2, mitochondrial [OS=Saccharomyces cerevisiae S288c]                                                                      | 855858 | MDL2; YPL270W        | response to stimulus;transport                                                                                                | membrane;mitochondrion                  | catalytic activity;nucleotide binding;transporter activity                | 1.006 | 0.708  | 0.70 |
| P53982 | isocitrate dehydrogenase [NADP] [OS=Saccharomyces cerevisiae S288c]                                                                                 | 855723 | IDP3; YNL009W        | metabolic process                                                                                                             | cytoplasm;mitochondrion                 | catalytic activity;metal ion binding;nucleotide binding                   | 1.943 | 1.371  | 0.71 |
| P00445 | Superoxide dismutase [Cu-Zn] [OS=Saccharomyces cerevisiae S288c]                                                                                    | 853568 | SOD1; YJR104C        | cell organization and biogenesis;cellular homeostasis;metabolic process;regulation of biological process;response to stimulus | cytoplasm;cytosol;mitochondrion;nucleus | antioxidant activity;catalytic activity;metal ion binding;protein binding | 1.848 | 1.31   | 0.71 |
| P02381 | Ribosomal protein VAR1, mitochondrial [OS=Saccharomyces cerevisiae S288c]                                                                           | 854586 | VAR1; Q0140          | cell organization and biogenesis;metabolic process                                                                            | mitochondrion;ribosome                  | structural molecule activity                                              | 0.52  | 0.369  | 0.71 |
| Q12320 | Hydroxyacylglutathione hydrolase, mitochondrial [OS=Saccharomyces cerevisiae S288c]                                                                 | 854205 | GLO4; YOR040W        | metabolic process                                                                                                             | mitochondrion;organelle lumen           | catalytic activity;metal ion binding                                      | 0.52  | 0.369  | 0.71 |
| P52893 | probable alanine aminotransferase, mitochondrial [OS=Saccharomyces cerevisiae S288c]                                                                | 850778 | ALT1; YLR089C        | metabolic process                                                                                                             | mitochondrion;organelle lumen           | catalytic activity                                                        | 0.951 | 0.682  | 0.72 |
| P32266 | Dynamin-like GTPase MGM1, mitochondrial [OS=Saccharomyces cerevisiae S288c]                                                                         | 854386 | MGM1; YOR211C        | cell organization and biogenesis                                                                                              | membrane;mitochondrion                  | catalytic activity;nucleotide binding;protein binding                     | 0.389 | 0.28   | 0.72 |
| P03879 | Intron-encoded RNA maturase bi4 [OS=Saccharomyces cerevisiae S288c]                                                                                 | 854582 | BI4; Q0120           | metabolic process                                                                                                             | membrane;mitochondrion                  | catalytic activity;RNA binding                                            | 0.389 | 0.28   | 0.72 |
| P53292 | 37S ribosomal protein S35, mitochondrial [OS=Saccharomyces cerevisiae S288c]                                                                        | 853075 | MRPS35 ; YGR165W     | cell organization and biogenesis;metabolic process                                                                            | mitochondrion;ribosome                  | structural molecule activity                                              | 1.512 | 1.089  | 0.72 |
| Q03028 | Mitochondrial 2-oxodicarboxylate carrier 1 [OS=Saccharomyces cerevisiae S288c]                                                                      | 855969 | ODC1; YPL134C        | metabolic process;transport                                                                                                   | membrane;mitochondrion                  | structural molecule activity;transporter activity                         | 4.275 | 3.084  | 0.72 |

|        |                                                                                                              |        |                   |                                                                                   |                                |                                                                           |        |        |      |
|--------|--------------------------------------------------------------------------------------------------------------|--------|-------------------|-----------------------------------------------------------------------------------|--------------------------------|---------------------------------------------------------------------------|--------|--------|------|
| P81449 | ATP synthase subunit e, mitochondrial [OS=Saccharomyces cerevisiae S288c]                                    | 851922 | TIM11; YDR322 C-A | cell organization and biogenesis;metabolic process;transport                      | membrane;mitochondrion         | catalytic activity;structural molecule activity;transporter activity      | 9      | 6.499  | 0.72 |
| Q12031 | Mitochondrial 2-methylisocitrate lyase [OS=Saccharomyces cerevisiae S288c]                                   | 856114 | ICL2; YPR006C     | metabolic process                                                                 | mitochondrion;organelle lumen  | catalytic activity                                                        | 3.833  | 2.793  | 0.73 |
| P33421 | Succinate dehydrogenase [ubiquinone] cytochrome b subunit, mitochondrial [OS=Saccharomyces cerevisiae S288c] | 853716 | SDH3; YKL141 W    | cell organization and biogenesis;metabolic process;transport                      | membrane;mitochondrion         | catalytic activity;metal ion binding                                      | 1.276  | 0.931  | 0.73 |
| Q08968 | UPF0061 protein FMP40 [OS=Saccharomyces cerevisiae S288c]                                                    | 855879 | FMP40; YPL222 W   |                                                                                   | mitochondrion                  | protein binding                                                           | 2.162  | 1.588  | 0.73 |
| P32335 | Protein MSS51, mitochondrial [OS=Saccharomyces cerevisiae S288c]                                             | 850900 | MSS51; YLR203C    | metabolic process;regulation of biological process                                | membrane;mitochondrion         | protein binding;translation regulator activity                            | 1.154  | 0.848  | 0.73 |
| P54003 | Protein SUR7 [OS=Saccharomyces cerevisiae S288c]                                                             | 854953 | SUR7; YML052 W    | cell differentiation;transport                                                    | membrane;mitochondrion         |                                                                           | 1.154  | 0.848  | 0.73 |
| P40098 | uncharacterized mitochondrial membrane protein FMP10 [OS=Saccharomyces cerevisiae S288c]                     | 856931 | FMP10; YER182 W   |                                                                                   | membrane;mitochondrion         |                                                                           | 4.456  | 3.281  | 0.74 |
| P42847 | 37S ribosomal protein S18, mitochondrial [OS=Saccharomyces cerevisiae S288c]                                 | 855410 | MRPS18 ; YNL306 W | cell organization and biogenesis;metabolic process                                | mitochondrion;ribosome         | RNA binding;structural molecule activity                                  | 1.054  | 0.778  | 0.74 |
| P32904 | 54S ribosomal protein L6, mitochondrial [OS=Saccharomyces cerevisiae S288c]                                  | 856552 | MRPL6; YHR147 C   | cell organization and biogenesis;metabolic process                                | mitochondrion;ribosome         | RNA binding;structural molecule activity                                  | 1.054  | 0.778  | 0.74 |
| P00431 | cytochrome c peroxidase, mitochondrial [OS=Saccharomyces cerevisiae S288c]                                   | 853940 | CCP1; YKR066C     | metabolic process;response to stimulus                                            | mitochondrion;organelle lumen  | antioxidant activity;catalytic activity;metal ion binding;protein binding | 1.649  | 1.219  | 0.74 |
| P38988 | Mitochondrial GTP/GDP carrier protein 1 [OS=Saccharomyces cerevisiae S288c]                                  | 851329 | GGC1; YDL198C     | cell organization and biogenesis;cellular homeostasis;metabolic process;transport | membrane;mitochondrion         | structural molecule activity;transporter activity                         | 3.16   | 2.34   | 0.74 |
| P23644 | Mitochondrial import receptor subunit TOM40 [OS=Saccharomyces cerevisiae S288c]                              | 855243 | TOM40; YMR203 W   | transport                                                                         | cytosol;membrane;mitochondrion | protein binding;transporter activity                                      | 0.896  | 0.668  | 0.75 |
| P02992 | elongation factor Tu, mitochondrial [OS=Saccharomyces cerevisiae S288c]                                      | 854359 | TUF1; YOR187 W    | cell organization and biogenesis;metabolic process                                | mitochondrion                  | catalytic activity;nucleotide binding;RNA binding                         | 12.043 | 9      | 0.75 |
| P36521 | 54S ribosomal protein L11, mitochondrial [OS=Saccharomyces cerevisiae S288c]                                 | 851325 | MRPL11; YDL202 W  | cell organization and biogenesis;metabolic process                                | mitochondrion;ribosome         | structural molecule activity                                              | 0.833  | 0.624  | 0.75 |
| P21801 | Succinate dehydrogenase [ubiquinone] iron-sulfur subunit, mitochondrial [OS=Saccharomyces cerevisiae S288c]  | 850685 | SDH2; YLL041C     | metabolic process;transport                                                       | membrane;mitochondrion         | catalytic activity;metal ion binding                                      | 18.684 | 14.013 | 0.75 |
| Q01852 | Mitochondrial import inner membrane translocase subunit TIM44 [OS=Saccharomyces cerevisiae S288c]            | 854790 | TIM44; YIL022W    | transport                                                                         | membrane;mitochondrion         | nucleotide binding;protein binding                                        | 4.125  | 3.101  | 0.75 |
| P14908 | Mitochondrial transcription factor 1 [OS=Saccharomyces cerevisiae S288c]                                     | 855268 | MTF1; YMR228 W    | metabolic process;regulation of biological process                                | mitochondrion;organelle lumen  | catalytic activity;DNA binding;RNA binding                                | 0.778  | 0.585  | 0.75 |
| P38300 | Inner membrane mitoribosome receptor MBA1, mitochondrial [OS=Saccharomyces cerevisiae S288c]                 | 852483 | MBA1; YBR185C     | cell organization and biogenesis;regulation of biological process                 | membrane;mitochondrion         |                                                                           | 0.778  | 0.585  | 0.75 |
| P09457 | ATP synthase subunit 5, mitochondrial [OS=Saccharomyces cerevisiae S288c]                                    | 851892 | ATP5; YDR298 C    | metabolic process;transport                                                       | membrane;mitochondrion         | catalytic activity;transporter activity                                   | 10.365 | 7.799  | 0.75 |
| P38072 | Protein SCO2, mitochondrial [OS=Saccharomyces cerevisiae S288c]                                              | 852312 | SCO2; YBR024 W    | cell organization and biogenesis;cellular homeostasis;metabolic process;transport | membrane;mitochondrion         | antioxidant activity;catalytic activity;metal ion binding                 | 0.73   | 0.551  | 0.75 |
| P53219 | Abhydrolase domain-containing protein IMO32 [OS=Saccharomyces cerevisiae S288c]                              | 852919 | IMO32; YGR031 W   | metabolic process;transport                                                       | mitochondrion                  | catalytic activity                                                        | 0.73   | 0.551  | 0.75 |
| P53266 | Cytochrome oxidase assembly protein SHY1 [OS=Saccharomyces cerevisiae S288c]                                 | 853009 | SHY1; YGR112 W    | cell organization and biogenesis                                                  | membrane;mitochondrion         | protein binding                                                           | 1.783  | 1.346  | 0.75 |
| P07257 | Cytochrome b-c1 complex subunit 2, mitochondrial [OS=Saccharomyces cerevisiae S288c]                         | 856321 | QCR2; YPR191 W    | metabolic process;transport                                                       | membrane;mitochondrion         | catalytic activity;metal ion binding;protein binding;transporter activity | 21.19  | 16.013 | 0.76 |

|        |                                                                                                      |        |                         |                                                                              |                                              |                                                           |        |        |      |
|--------|------------------------------------------------------------------------------------------------------|--------|-------------------------|------------------------------------------------------------------------------|----------------------------------------------|-----------------------------------------------------------|--------|--------|------|
| Q05648 | MIOREX complex component 10 [OS=Saccharomyces cerevisiae S288c]                                      | 851876 | YDR282C; MRX10; YDR282C |                                                                              | membrane;mitochondrion                       |                                                           | 0.65   | 0.492  | 0.76 |
| P38088 | Glycine--tRNA ligase 1, mitochondrial [OS=Saccharomyces cerevisiae S288c]                            |        |                         | metabolic process                                                            | cytoplasm;mitochondrion;organelle lumen      | catalytic activity;nucleotide binding;protein binding     | 0.616  | 0.468  | 0.76 |
| Q03976 | 37S ribosomal protein S24, mitochondrial [OS=Saccharomyces cerevisiae S288c]                         | 851755 | RSM24; YDR175C          | cell organization and biogenesis;metabolic process                           | mitochondrion;ribosome                       | structural molecule activity                              | 0.585  | 0.445  | 0.76 |
| Q03327 | Mitochondrial fusion and transport protein Ugo1 [OS=Saccharomyces cerevisiae S288c]                  | 852081 | UGO1; YDR470C           | cell organization and biogenesis;metabolic process                           | membrane;mitochondrion                       | protein binding;structural molecule activity              | 0.557  | 0.425  | 0.76 |
| P36060 | NADH-cytochrome b5 reductase 2 [OS=Saccharomyces cerevisiae S288c]                                   | 853707 | MCR1; YKL150W           | metabolic process;response to stimulus                                       | membrane;mitochondrion                       | catalytic activity;protein binding                        | 10.288 | 7.859  | 0.76 |
| P40185 | Protein mmf1, mitochondrial [OS=Saccharomyces cerevisiae S288c]                                      | 854760 | MMF1; YIL051C           | cell organization and biogenesis;metabolic process                           | mitochondrion;organelle lumen                |                                                           | 6.943  | 5.31   | 0.76 |
| P00927 | Threonine dehydratase, mitochondrial [OS=Saccharomyces cerevisiae S288c]                             | 856819 | ILV1; YER086W           | metabolic process                                                            | cytoplasm;mitochondrion                      | catalytic activity                                        | 2.257  | 1.728  | 0.77 |
| P36141 | Putative redox protein fmp46, mitochondrial [OS=Saccharomyces cerevisiae S288c]                      | 853923 | FMP46; YKR049C          | metabolic process                                                            | mitochondrion                                | catalytic activity;protein binding                        | 4.337  | 3.329  | 0.77 |
| Q05931 | Heat shock protein SSQ1, mitochondrial [OS=Saccharomyces cerevisiae S288c]                           | 851084 | SSQ1; YLR369W           | cell organization and biogenesis;metabolic process                           | mitochondrion;organelle lumen                | nucleotide binding;protein binding                        | 0.884  | 0.679  | 0.77 |
| P53598 | Succinyl-CoA ligase [ADP-forming] subunit alpha, mitochondrial [OS=Saccharomyces cerevisiae S288c]   | 854310 | LSC1; YOR142W           | metabolic process                                                            | cytosol;mitochondrion                        | catalytic activity;nucleotide binding                     | 13.384 | 10.288 | 0.77 |
| P32331 | Carrier protein YMC1, mitochondrial [OS=Saccharomyces cerevisiae S288c]                              | 856171 | YMC1; YPR058W           | metabolic process;transport                                                  | membrane;mitochondrion;vacuole               | structural molecule activity;transporter activity         | 1.254  | 0.968  | 0.77 |
| P09440 | C-1-tetrahydrofolate synthase, mitochondrial [OS=Saccharomyces cerevisiae S288c]                     | 852378 | MIS1; YBR084W           | metabolic process                                                            | cytosol;mitochondrion                        | catalytic activity;nucleotide binding                     | 0.9    | 0.696  | 0.77 |
| P25374 | Cysteine desulfurase, mitochondrial [OS=Saccharomyces cerevisiae S288c]                              | 850343 | NFS1; YCL017C           | cell organization and biogenesis;cellular homeostasis;metabolic process      | mitochondrion;nucleus                        | catalytic activity;metal ion binding;protein binding      | 2.3    | 1.783  | 0.78 |
| P27697 | Atypical kinase COQ8, mitochondrial [OS=Saccharomyces cerevisiae S288c]                              | 852758 | COQ8; YGL119W           | metabolic process                                                            | membrane;mitochondrion;organelle lumen       | catalytic activity;nucleotide binding                     | 0.365  | 0.283  | 0.78 |
| Q01217 | Protein ARG5,6, mitochondrial [OS=Saccharomyces cerevisiae S288c]                                    | 856800 | ARG5,6; YER069W         | metabolic process;regulation of biological process                           | cytoplasm;mitochondrion;organelle lumen      | catalytic activity;nucleotide binding;protein binding     | 0.233  | 0.182  | 0.78 |
| Q06143 | mitochondrial dicarboxylate transporter [OS=Saccharomyces cerevisiae S288c]                          | 851063 | DIC1; YLR348C           | metabolic process;transport                                                  | membrane;mitochondrion                       | structural molecule activity;transporter activity         | 0.931  | 0.73   | 0.78 |
| P16387 | Pyruvate dehydrogenase E1 component subunit alpha, mitochondrial [OS=Saccharomyces cerevisiae S288c] | 856925 | PDA1; YER178W           | cell growth;metabolic process                                                | mitochondrion;organelle lumen                | catalytic activity                                        | 12.46  | 9.771  | 0.78 |
| P38797 | Protein phosphatase 2C homolog 7, mitochondrial [OS=Saccharomyces cerevisiae S288c]                  | 856475 | PTC7; YHR076W           | metabolic process                                                            | mitochondrion                                | catalytic activity;metal ion binding;protein binding      | 0.874  | 0.688  | 0.79 |
| P36046 | Mitochondrial intermembrane space import and assembly protein 40 [OS=Saccharomyces cerevisiae S288c] | 853639 | MIA40; YKL195W          | cellular component movement;metabolic process;response to stimulus;transport | membrane;mitochondrion                       | catalytic activity;protein binding;transporter activity   | 2.914  | 2.3    | 0.79 |
| P00447 | Superoxide dismutase [Mn], mitochondrial [OS=Saccharomyces cerevisiae S288c]                         | 856399 | SOD2; YHR008C           | metabolic process;response to stimulus                                       | mitochondrion;organelle lumen                | antioxidant activity;catalytic activity;metal ion binding | 3.924  | 3.125  | 0.80 |
| P53969 | Sorting assembly machinery 50 kDa subunit [OS=Saccharomyces cerevisiae S288c]                        | 855705 | SAM50; YNL026W          | cell organization and biogenesis;transport                                   | membrane;mitochondrion                       | protein binding;transporter activity                      | 0.61   | 0.487  | 0.80 |
| P08466 | mitochondrial nuclease [OS=Saccharomyces cerevisiae S288c]                                           | 853222 | NUC1; YJL208C           | cell death;metabolic process                                                 | membrane;mitochondrion;nucleus               | catalytic activity;metal ion binding                      | 1.336  | 1.069  | 0.80 |
| Q12466 | tricalbin-1 [OS=Saccharomyces cerevisiae S288c]                                                      | 854253 | TCB1; YOR086C           | cell organization and biogenesis;regulation of biological process            | endoplasmic reticulum;membrane;mitochondrion | metal ion binding;protein binding                         | 0.52   | 0.417  | 0.80 |
| P07253 | cytochrome B pre-mRNA-processing protein 6                                                           | 852417 | CBP6; YBR120C           | cell organization and biogenesis;metabolic                                   | mitochondrion;ribosome                       |                                                           | 3.394  | 2.728  | 0.80 |

|        |                                                                                                           |        |                |                                                                                                          |                                                               |                                                                                |        |        |      |
|--------|-----------------------------------------------------------------------------------------------------------|--------|----------------|----------------------------------------------------------------------------------------------------------|---------------------------------------------------------------|--------------------------------------------------------------------------------|--------|--------|------|
|        | [OS=Saccharomyces cerevisiae S288c]                                                                       |        |                | process;regulation of biological process                                                                 |                                                               |                                                                                |        |        |      |
| P15992 | heat shock protein 26 [OS=Saccharomyces cerevisiae S288c]                                                 | 852364 | HSP26; YBR072W | metabolic process;response to stimulus                                                                   | cytoplasm;mitochondrion;nucleus                               | protein binding;RNA binding                                                    | 4.878  | 3.924  | 0.80 |
| P37293 | N-terminal acetyltransferase 2 [OS=Saccharomyces cerevisiae S288c]                                        | 853050 | NAT2; YGR147C  | metabolic process                                                                                        | cytoplasm;mitochondrion                                       | catalytic activity                                                             | 1.154  | 0.931  | 0.81 |
| P33310 | ATP-dependent permease MDL1, mitochondrial [OS=Saccharomyces cerevisiae S288c]                            | 850885 | MDL1; YLR188W  | transport                                                                                                | membrane;mitochondrion                                        | catalytic activity;nucleotide binding;transporter activity                     | 0.438  | 0.354  | 0.81 |
| Q07651 | SUR7 family protein FMP45 [OS=Saccharomyces cerevisiae S288c]                                             | 851304 | FMP45; YDL222C | cell differentiation;cell organization and biogenesis                                                    | membrane;mitochondrion                                        |                                                                                | 6.017  | 4.878  | 0.81 |
| P19657 | plasma membrane ATPase 2 [OS=Saccharomyces cerevisiae S288c]                                              | 856071 | PMA2; YPL036W  | cellular homeostasis;metabolic process;transport                                                         | membrane;mitochondrion                                        | catalytic activity;metal ion binding;nucleotide binding;transporter activity   | 6.897  | 5.615  | 0.81 |
| Q12166 | 2-isopropylmalate synthase 2, mitochondrial [OS=Saccharomyces cerevisiae S288c]                           | 854275 | LEU9; YOR108W  | metabolic process                                                                                        | mitochondrion                                                 | catalytic activity;protein binding                                             | 1.707  | 1.39   | 0.81 |
| P54783 | D-arabinono-1,4-lactone oxidase [OS=Saccharomyces cerevisiae S288c]                                       | 854888 | ALO1; YML086C  | metabolic process;response to stimulus                                                                   | membrane;mitochondrion                                        | catalytic activity;nucleotide binding                                          | 3.299  | 2.687  | 0.81 |
| P40008 | Protein FMP52, mitochondrial [OS=Saccharomyces cerevisiae S288c]                                          | 856721 | FMP52; YER004W |                                                                                                          | endoplasmic reticulum;membrane;mitochondrion                  | catalytic activity                                                             | 2.652  | 2.162  | 0.82 |
| P38127 | mitochondrial carrier protein RIM2 [OS=Saccharomyces cerevisiae S288c]                                    | 852491 | RIM2; YBR192W  | cell organization and biogenesis;metabolic process;transport                                             | membrane;mitochondrion                                        | structural molecule activity;transporter activity                              | 1.512  | 1.239  | 0.82 |
| P19882 | heat shock protein 60, mitochondrial [OS=Saccharomyces cerevisiae S288c]                                  | 850963 | HSP60; YLR259C | cell organization and biogenesis;metabolic process;regulation of biological process;transport            | cytoplasm;cytosol;membrane;mitochondrion ;organelle lumen     | catalytic activity;DNA binding;nucleotide binding;protein binding              | 13.384 | 10.994 | 0.82 |
| P35191 | DnaJ homolog 1, mitochondrial [OS=Saccharomyces cerevisiae S288c]                                         | 850530 | MDJ1; YFL016C  | cell organization and biogenesis;metabolic process;regulation of biological process;response to stimulus | mitochondrion;organelle lumen                                 | enzyme regulator activity;metal ion binding;nucleotide binding;protein binding | 2.765  | 2.275  | 0.82 |
| P47045 | mitochondrial import inner membrane translocase subunit TIM54 [OS=Saccharomyces cerevisiae S288c]         | 853392 | TIM54; YJL054W | cell organization and biogenesis;transport                                                               | cytosol;membrane;mitochondrion                                | transporter activity                                                           | 0.655  | 0.54   | 0.82 |
| P32795 | Mitochondrial inner membrane i-AAA protease supercomplex subunit YME1 [OS=Saccharomyces cerevisiae S288c] | 856135 | YME1; YPR024W  | metabolic process;response to stimulus;transport                                                         | membrane;mitochondrion                                        | catalytic activity;metal ion binding;nucleotide binding;protein binding        | 1.3    | 1.085  | 0.83 |
| P32898 | Mitochondrial presequence protease [OS=Saccharomyces cerevisiae S288c]                                    | 852041 | CYM1; YDR430C  | metabolic process                                                                                        | mitochondrion                                                 | catalytic activity;metal ion binding                                           | 0.812  | 0.682  | 0.84 |
| Q04013 | Citrate/oxoglutarate carrier protein [OS=Saccharomyces cerevisiae S288c]                                  | 855282 | YHM2; YMR241W  | cell organization and biogenesis;metabolic process;transport                                             | membrane;mitochondrion                                        | DNA binding;structural molecule activity;transporter activity                  | 2.162  | 1.818  | 0.84 |
| P33303 | Succinate/fumarate mitochondrial transporter [OS=Saccharomyces cerevisiae S288c]                          | 853558 | SFC1; YJR095W  | metabolic process;transport                                                                              | membrane;mitochondrion                                        | structural molecule activity;transporter activity                              | 6.743  | 5.813  | 0.86 |
| P49367 | Homoaconitase, mitochondrial [OS=Saccharomyces cerevisiae S288c]                                          | 851820 | LYS4; YDR234W  | metabolic process                                                                                        | mitochondrion                                                 | catalytic activity;metal ion binding;protein binding                           | 0.638  | 0.551  | 0.86 |
| P16451 | Pyruvate dehydrogenase complex protein X component, mitochondrial [OS=Saccharomyces cerevisiae S288c]     | 853107 | PDX1; YGR193C  | metabolic process                                                                                        | mitochondrion;organelle lumen                                 | catalytic activity;structural molecule activity                                | 2.3    | 2.03   | 0.88 |
| P38077 | ATP synthase subunit gamma, mitochondrial [OS=Saccharomyces cerevisiae S288c]                             | 852327 | ATP3; YBR039W  | metabolic process;transport                                                                              | membrane;mitochondrion                                        | catalytic activity;transporter activity                                        | 9      | 8.006  | 0.89 |
| P40012 | protoporphyrinogen oxidase [OS=Saccharomyces cerevisiae S288c]                                            | 856733 | HEM14; YER014W | metabolic process                                                                                        | membrane;mitochondrion                                        | catalytic activity                                                             | 1.198  | 1.069  | 0.89 |
| Q01574 | acetyl-coenzyme A synthetase 1 [OS=Saccharomyces cerevisiae S288c]                                        | 851245 | ACS1; YAL054C  | cell organization and biogenesis;metabolic process                                                       | cytoplasm;cytosol;endoplasmic reticulum;mitochondrion;nucleus | catalytic activity;nucleotide binding                                          | 3.281  | 3.03   | 0.92 |
| P17505 | Malate dehydrogenase, mitochondrial [OS=Saccharomyces cerevisiae S288c]                                   | 853777 | MDH1; YKL085W  | metabolic process                                                                                        | mitochondrion;organelle lumen                                 | catalytic activity;protein binding;RNA binding                                 | 28.936 | 28.936 | 1.00 |
| P39987 | Heat shock protein SSC3, mitochondrial [OS=Saccharomyces cerevisiae S288c]                                | 856682 | ECM10; YEL030W | cell organization and biogenesis;metabolic process;transport                                             | mitochondrion                                                 | nucleotide binding;protein binding                                             | 1.976  | 1.976  | 1.00 |

|        |                                                                                                                    |        |                 |                                                                                                                                              |                                              |                                                                                                    |        |        |      |
|--------|--------------------------------------------------------------------------------------------------------------------|--------|-----------------|----------------------------------------------------------------------------------------------------------------------------------------------|----------------------------------------------|----------------------------------------------------------------------------------------------------|--------|--------|------|
|        | S288c]                                                                                                             |        |                 |                                                                                                                                              |                                              |                                                                                                    |        |        |      |
| Q03104 | Meiotic sister chromatid recombination protein 1 [OS=Saccharomyces cerevisiae S288c]                               | 854911 | MSC1; YML128C   | metabolic process                                                                                                                            | endoplasmic reticulum;membrane;mitochondrion |                                                                                                    | 1.929  | 1.929  | 1.00 |
| P04710 | ADP,ATP carrier protein 1 [OS=Saccharomyces cerevisiae S288c]                                                      | 855078 | AAC1; YMR056C   | metabolic process;transport                                                                                                                  | cytosol;membrane;mitochondrion               | structural molecule activity;transporter activity                                                  | 10.288 | 10.288 | 1.00 |
| P05626 | ATP synthase subunit 4, mitochondrial [OS=Saccharomyces cerevisiae S288c]                                          | 856027 | ATP4; YPL078C   | cell organization and biogenesis;metabolic process;transport                                                                                 | membrane;mitochondrion                       | catalytic activity;transporter activity                                                            | 3.084  | 3.084  | 1.00 |
| P10823 | Guanine nucleotide-binding protein alpha-2 subunit [OS=Saccharomyces cerevisiae S288c]                             | 856741 | GPA2; YER020W   | cell differentiation;cell growth;cell organization and biogenesis;cellular homeostasis;regulation of biological process;response to stimulus | cytosol;membrane;mitochondrion               | catalytic activity;metal ion binding;nucleotide binding;protein binding;signal transducer activity | 1.346  | 1.346  | 1.00 |
| P42940 | Probable electron transfer flavoprotein subunit beta [OS=Saccharomyces cerevisiae S288c]                           | 853121 | CIR1; YGR207C   | metabolic process;transport                                                                                                                  | mitochondrion;organelle lumen                |                                                                                                    | 3.87   | 3.87   | 1.00 |
| P00044 | Cytochrome c iso-1 [OS=Saccharomyces cerevisiae S288c]                                                             | 853507 | CYC1; YJR048W   | metabolic process;transport                                                                                                                  | mitochondrion                                | metal ion binding;protein binding                                                                  | 12.335 | 12.335 | 1.00 |
| P46681 | D-lactate dehydrogenase [cytochrome] 2, mitochondrial [OS=Saccharomyces cerevisiae S288c]                          | 851376 | DL2; YDL178W    | metabolic process                                                                                                                            | mitochondrion;organelle lumen                | catalytic activity;nucleotide binding;protein binding                                              | 1.264  | 1.264  | 1.00 |
| P19955 | 37S ribosomal protein YMR-31, mitochondrial [OS=Saccharomyces cerevisiae S288c]                                    | 850610 | YMR31; YFR049W  | cell organization and biogenesis;metabolic process                                                                                           | mitochondrion;ribosome                       | catalytic activity;protein binding;structural molecule activity                                    | 15.681 | 15.681 | 1.00 |
| P00410 | Cytochrome c oxidase subunit 2 [OS=Saccharomyces cerevisiae S288c]                                                 | 854622 | COX2; Q0250     | metabolic process;transport                                                                                                                  | membrane;mitochondrion                       | catalytic activity;metal ion binding;protein binding;transporter activity                          | 3.642  | 3.642  | 1.00 |
| P32332 | Mitochondrial oxaloacetate transport protein [OS=Saccharomyces cerevisiae S288c]                                   | 853739 | OAC1; YKL120W   | metabolic process;transport                                                                                                                  | membrane;mitochondrion                       | structural molecule activity;transporter activity                                                  | 2.594  | 2.594  | 1.00 |
| Q04728 | Arginine biosynthesis bifunctional protein ArgJ, mitochondrial [OS=Saccharomyces cerevisiae S288c]                 | 855084 | ARG7; YMR062C   | metabolic process                                                                                                                            | mitochondrion;organelle lumen                | catalytic activity                                                                                 | 0.63   | 0.63   | 1.00 |
| Q08223 | Altered inheritance of mitochondria protein 39, mitochondrial [OS=Saccharomyces cerevisiae S288c]                  | 854103 | AIM39; YOL053W  |                                                                                                                                              | cytosol;membrane;mitochondrion               |                                                                                                    | 0.995  | 0.995  | 1.00 |
| Q12289 | mitochondrial carnitine carrier [OS=Saccharomyces cerevisiae S288c]                                                | 854267 | CRC1; YOR100C   | metabolic process;transport                                                                                                                  | membrane;mitochondrion                       | structural molecule activity;transporter activity                                                  | 0.931  | 0.931  | 1.00 |
| P32799 | Cytochrome c oxidase subunit 6A, mitochondrial [OS=Saccharomyces cerevisiae S288c]                                 | 852684 | COX13; YGL191W  | cell organization and biogenesis;metabolic process;regulation of biological process;transport                                                | membrane;mitochondrion                       | catalytic activity;enzyme regulator activity;transporter activity                                  | 11.589 | 11.589 | 1.00 |
| P37298 | Succinate dehydrogenase [ubiquinone] cytochrome b small subunit, mitochondrial [OS=Saccharomyces cerevisiae S288c] | 851758 | SDH4; YDR178W   | metabolic process;transport                                                                                                                  | membrane;mitochondrion                       | catalytic activity;metal ion binding                                                               | 3.642  | 3.642  | 1.00 |
| Q03798 | Altered inheritance of mitochondria protein 36, mitochondrial [OS=Saccharomyces cerevisiae S288c]                  | 855189 | AIM36; YMR157C  |                                                                                                                                              | membrane;mitochondrion                       |                                                                                                    | 1.336  | 1.336  | 1.00 |
| P38523 | GrpE protein homolog, mitochondrial [OS=Saccharomyces cerevisiae S288c]                                            | 854407 | MGE1; YOR232W   | metabolic process;regulation of biological process;transport                                                                                 | membrane;mitochondrion;organelle lumen       | enzyme regulator activity;nucleotide binding;protein binding                                       | 0.833  | 0.833  | 1.00 |
| P10507 | mitochondrial-processing peptidase subunit beta [OS=Saccharomyces cerevisiae S288c]                                | 850860 | MAS1; YLR163C   | metabolic process;transport                                                                                                                  | mitochondrion;organelle lumen                | catalytic activity;metal ion binding;protein binding                                               | 0.778  | 0.778  | 1.00 |
| P22354 | 54S ribosomal protein L20, mitochondrial [OS=Saccharomyces cerevisiae S288c]                                       | 853960 | MRPL20; YKR085C | cell organization and biogenesis;metabolic process                                                                                           | mitochondrion;ribosome                       | structural molecule activity                                                                       | 2.162  | 2.162  | 1.00 |
| P25038 | Translation initiation factor IF-2, mitochondrial [OS=Saccharomyces cerevisiae S288c]                              | 854135 | IFM1; YOL023W   | cell organization and biogenesis;metabolic process                                                                                           | mitochondrion;nucleus                        | catalytic activity;nucleotide binding;RNA binding                                                  | 0.299  | 0.299  | 1.00 |
| P41903 | Peroxisomal acyl-coenzyme A thioester hydrolase 1 [OS=Saccharomyces cerevisiae S288c]                              | 853477 | TES1; YJR019C   | metabolic process                                                                                                                            | mitochondrion                                | catalytic activity                                                                                 | 0.931  | 0.931  | 1.00 |

|        |                                                                                                                |             |                                 |                                                                                                                    |                                       |                                                                   |       |       |      |
|--------|----------------------------------------------------------------------------------------------------------------|-------------|---------------------------------|--------------------------------------------------------------------------------------------------------------------|---------------------------------------|-------------------------------------------------------------------|-------|-------|------|
| P25372 | Thioredoxin-3, mitochondrial [OS=Saccharomyces cerevisiae S288c]                                               | 85044<br>4  | TRX3;<br>YCR083<br>W            | cellular homeostasis;metabolic process;regulation of biological process;response to stimulus;transport             | cytoplasm;mitochondrion               | catalytic activity                                                | 2.511 | 2.511 | 1.00 |
| Q3E824 | Uncharacterized protein YOR020W-A [OS=Saccharomyces cerevisiae S288c]                                          | 14664<br>80 | YOR020<br>W-A;<br>YOR020<br>W-A | metabolic process;transport                                                                                        | membrane;mitochondrion                |                                                                   | 3.642 | 3.642 | 1.00 |
| P32611 | 54S ribosomal protein RML2, mitochondrial [OS=Saccharomyces cerevisiae S288c]                                  | 85666<br>0  | RML2;<br>YEL050C                | cell organization and biogenesis;metabolic process                                                                 | mitochondrion;ribosome                | catalytic activity;RNA binding;structural molecule activity       | 0.638 | 0.638 | 1.00 |
| Q06493 | LETM1 domain-containing protein YLH47, mitochondrial [OS=Saccharomyces cerevisiae S288c]                       | 85624<br>3  | YLH47;<br>YPR125<br>W           | cell organization and biogenesis;transport                                                                         | membrane;mitochondrion                |                                                                   | 0.61  | 0.61  | 1.00 |
| P11325 | Leucine-tRNA ligase, mitochondrial [OS=Saccharomyces cerevisiae S288c]                                         | 85109<br>8  | NAM2;<br>YLR382C                | cell organization and biogenesis;metabolic process;regulation of biological process                                | cytosol;mitochondrion;organelle lumen | catalytic activity;nucleotide binding;RNA binding                 | 0.208 | 0.208 | 1.00 |
| P53889 | uncharacterized mitochondrial hydrolase FMP41 [OS=Saccharomyces cerevisiae S288c]                              | 85555<br>3  | FMP41;<br>YNL168C               | metabolic process                                                                                                  | mitochondrion                         | catalytic activity;metal ion binding                              | 0.501 | 0.501 | 1.00 |
| Q01519 | Cytochrome c oxidase subunit 6b [OS=Saccharomyces cerevisiae S288c]                                            | 85072<br>7  | COX12;<br>YLR038C               | cell organization and biogenesis;metabolic process;transport                                                       | mitochondrion                         | catalytic activity;transporter activity                           | 3.642 | 3.642 | 1.00 |
| P23369 | 54S ribosomal protein L25, mitochondrial [OS=Saccharomyces cerevisiae S288c]                                   | 85296<br>7  | MRPL25;<br>YGR076<br>C          | cell organization and biogenesis;metabolic process                                                                 | mitochondrion;ribosome                | structural molecule activity                                      | 1.31  | 1.31  | 1.00 |
| P21375 | Fumarate reductase 2 [OS=Saccharomyces cerevisiae S288c]                                                       | 85351<br>0  | OSM1;<br>YJR051<br>W            | metabolic process                                                                                                  | endoplasmic reticulum;mitochondrion   | catalytic activity;nucleotide binding                             | 0.346 | 0.346 | 1.00 |
| P37299 | cytochrome b-c1 complex subunit 10 [OS=Saccharomyces cerevisiae S288c]                                         | 85639<br>0  | QCR10;<br>YHR001<br>W-A         | metabolic process;transport                                                                                        | membrane;mitochondrion                | catalytic activity;transporter activity                           | 5.31  | 5.31  | 1.00 |
| P36147 | Presequence translocated-associated motor subunit pam17, mitochondrial [OS=Saccharomyces cerevisiae S288c]     | 85393<br>9  | PAM17;<br>YKR065C               | transport                                                                                                          | membrane;mitochondrion                |                                                                   | 1.371 | 1.371 | 1.00 |
| Q02608 | 37S ribosomal protein S16, mitochondrial [OS=Saccharomyces cerevisiae S288c]                                   | 85609<br>4  | MRPS16<br>;<br>YPL013C          | cell organization and biogenesis;metabolic process                                                                 | mitochondrion;ribosome                | structural molecule activity                                      | 0.931 | 0.931 | 1.00 |
| Q03246 | 37S ribosomal protein S17, mitochondrial [OS=Saccharomyces cerevisiae S288c]                                   | 85522<br>6  | MRPS17<br>;<br>YMR188<br>C      | cell differentiation;cell organization and biogenesis;metabolic process                                            | mitochondrion;ribosome                | RNA binding;structural molecule activity                          | 0.931 | 0.931 | 1.00 |
| P32792 | UPF0744 protein YSC83 [OS=Saccharomyces cerevisiae S288c]                                                      | 85641<br>0  | YSC83;<br>YHR017<br>W           |                                                                                                                    | membrane;mitochondrion                |                                                                   | 0.369 | 0.369 | 1.00 |
| Q04172 | Sensitive to high expression protein 9, mitochondrial [OS=Saccharomyces cerevisiae S288c]                      | 85200<br>2  | SHE9;<br>YDR393<br>W            | cell organization and biogenesis                                                                                   | membrane;mitochondrion                |                                                                   | 0.269 | 0.269 | 1.00 |
| P40530 | [Pyruvate dehydrogenase (acetyl-transferring)] kinase 1, mitochondrial [OS=Saccharomyces cerevisiae S288c]     | 85476<br>9  | PKP1;<br>YIL042C                | metabolic process                                                                                                  | mitochondrion;organelle lumen         | catalytic activity;nucleotide binding;protein binding             | 0.551 | 0.551 | 1.00 |
| Q6Q560 | Protein isd11 [OS=Saccharomyces cerevisiae S288c]                                                              | 85677<br>4  | ISD11;<br>YER048<br>W-A         | cell organization and biogenesis;metabolic process                                                                 | mitochondrion;organelle lumen         | catalytic activity;protein binding                                | 2.594 | 2.594 | 1.00 |
| P28737 | Protein MSP1 [OS=Saccharomyces cerevisiae S288c]                                                               | 85291<br>5  | MSP1;<br>YGR028<br>W            | cell organization and biogenesis;metabolic process;regulation of biological process;response to stimulus;transport | membrane;mitochondrion;nucleus        | catalytic activity;nucleotide binding;protein binding;RNA binding | 0.585 | 0.585 | 1.00 |
| Q02883 | N-acyl-phosphatidylethanolamine-hydrolyzing phospholipase D, mitochondrial [OS=Saccharomyces cerevisiae S288c] | 85600<br>1  | FMP30;<br>YPL103C               | metabolic process                                                                                                  | membrane;mitochondrion                | catalytic activity;metal ion binding                              | 0.304 | 0.304 | 1.00 |
| P21306 | ATP synthase subunit epsilon, mitochondrial [OS=Saccharomyces cerevisiae S288c]                                | 85585<br>7  | ATP15;<br>YPL271<br>W           | metabolic process;transport                                                                                        | membrane;mitochondrion                | catalytic activity;transporter activity                           | 2.162 | 2.162 | 1.00 |
| Q03799 | 37S ribosomal protein S8, mitochondrial [OS=Saccharomyces cerevisiae S288c]                                    | 85519<br>0  | MRPS8;<br>YMR158<br>W           | cell organization and biogenesis;metabolic process                                                                 | mitochondrion;ribosome                | structural molecule activity                                      | 0.701 | 0.701 | 1.00 |
| P32785 | Methionyl-tRNA formyltransferase, mitochondrial [OS=Saccharomyces cerevisiae S288c]                            | 85227<br>0  | FMT1;<br>YBL013<br>W            | metabolic process                                                                                                  | mitochondrion                         | catalytic activity                                                | 0.179 | 0.179 | 1.00 |
| P46998 | mitochondrial membrane protein FMP33 [OS=Saccharomyces                                                         | 85327<br>9  | FMP33;<br>YJL161W               |                                                                                                                    | membrane;mitochondrion                |                                                                   | 0.778 | 0.778 | 1.00 |

|        |                                                                                                    |                           |                                                 |                                                                                                                    |                                                                        |                                                                              |       |       |      |
|--------|----------------------------------------------------------------------------------------------------|---------------------------|-------------------------------------------------|--------------------------------------------------------------------------------------------------------------------|------------------------------------------------------------------------|------------------------------------------------------------------------------|-------|-------|------|
|        | cerevisiae S288c]                                                                                  |                           |                                                 |                                                                                                                    |                                                                        |                                                                              |       |       |      |
| Q12305 | Thiosulfate sulfurtransferase RDL1, mitochondrial [OS=Saccharomyces cerevisiae S288c]              | 85445<br>9                | RDL1;<br>YOR285<br>W                            |                                                                                                                    | endoplasmic reticulum;membrane;mitochondrion                           | catalytic activity                                                           | 0.668 | 0.668 | 1.00 |
| P18409 | Mitochondrial distribution and morphology protein 10 [OS=Saccharomyces cerevisiae S288c]           | 85122<br>3                | MDM10;<br>YAL010C                               | cell organization and biogenesis;transport                                                                         | membrane;mitochondrion                                                 | protein binding                                                              | 0.16  | 0.16  | 1.00 |
| P36523 | 54S ribosomal protein L15, mitochondrial [OS=Saccharomyces cerevisiae S288c]                       | 85102<br>2                | MRPL15;<br>YLR312<br>W-A                        | cell organization and biogenesis;metabolic process                                                                 | mitochondrion;ribosome                                                 | catalytic activity;RNA binding;structural molecule activity                  | 0.334 | 0.334 | 1.00 |
| POCX44 | 60S ribosomal protein L1-B [OS=Saccharomyces cerevisiae S288c]                                     | 85274<br>2;<br>85588<br>1 | RPL1B;<br>RPL1A;<br>YGL135<br>W;<br>YPL220<br>W | metabolic process                                                                                                  | cytoplasm;ribosome                                                     | RNA binding;structural molecule activity                                     | 0.425 | 0.425 | 1.00 |
| P20084 | 54S ribosomal protein L33, mitochondrial [OS=Saccharomyces cerevisiae S288c]                       | 85533<br>0                | MRPL33;<br>YMR286<br>W                          | cell organization and biogenesis;metabolic process                                                                 | mitochondrion;ribosome                                                 | structural molecule activity                                                 | 2.162 | 2.162 | 1.00 |
| P01098 | ATPase-stabilizing factor 9 kDa, mitochondrial [OS=Saccharomyces cerevisiae S288c]                 | 85142<br>6                | STF1;<br>YDL130<br>W-A                          | metabolic process;regulation of biological process                                                                 | mitochondrion                                                          | catalytic activity;enzyme regulator activity;protein binding                 | 2.162 | 2.162 | 1.00 |
| Q08645 | folypolyglutamate synthase [OS=Saccharomyces cerevisiae S288c]                                     | 85441<br>5                | MET7;<br>YOR241<br>W                            | metabolic process                                                                                                  | cytoplasm;endoplasmic reticulum;membrane;mitochondrion;organelle lumen | catalytic activity;nucleotide binding                                        | 0.233 | 0.233 | 1.00 |
| P34222 | Peptidyl-tRNA hydrolase 2 [OS=Saccharomyces cerevisiae S288c]                                      | 85222<br>3                | PTH2;<br>YBL057C                                | regulation of biological process                                                                                   | cytoplasm;cytosol;membrane;mitochondrion                               | catalytic activity;protein binding                                           | 0.425 | 0.425 | 1.00 |
| P40581 | peroxiredoxin HYR1 [OS=Saccharomyces cerevisiae S288c]                                             | 85485<br>5                | HYR1;<br>YIR037<br>W                            | metabolic process;response to stimulus                                                                             | cytoplasm;cytosol;mitochondrion;organelle lumen                        | antioxidant activity;catalytic activity                                      | 0.995 | 0.995 | 1.00 |
| P53875 | 54S ribosomal protein L19, mitochondrial [OS=Saccharomyces cerevisiae S288c]                       | 85553<br>6                | MRPL19;<br>YNL185C                              | cell organization and biogenesis;metabolic process                                                                 | mitochondrion;ribosome                                                 | RNA binding;structural molecule activity                                     | 0.874 | 0.874 | 1.00 |
| P53163 | 54S ribosomal protein L12, mitochondrial [OS=Saccharomyces cerevisiae S288c]                       | 85281<br>1                | MNP1;<br>YGL068<br>W                            | cell organization and biogenesis;metabolic process                                                                 | mitochondrion;ribosome                                                 | RNA binding;structural molecule activity                                     | 0.52  | 0.52  | 1.00 |
| P42844 | Mitochondrial protein import protein ZIM17 [OS=Saccharomyces cerevisiae S288c]                     | 85540<br>6                | ZIM17;<br>YNL310C                               | cell organization and biogenesis;metabolic process;regulation of biological process;response to stimulus;transport | membrane;mitochondrion;organelle lumen                                 | metal ion binding;protein binding                                            | 0.585 | 0.585 | 1.00 |
| Q06510 | Lysophosphatidylcholine acyltransferase [OS=Saccharomyces cerevisiae S288c]                        | 85626<br>2                | TAZ1;<br>YPR140<br>W                            | cell organization and biogenesis;metabolic process;transport                                                       | membrane;mitochondrion                                                 | catalytic activity                                                           | 0.194 | 0.194 | 1.00 |
| P38860 | GPase MTG2, mitochondrial [OS=Saccharomyces cerevisiae S288c]                                      | 85657<br>3                | MTG2;<br>YHR168<br>W                            | metabolic process;transport                                                                                        | membrane;mitochondrion                                                 | catalytic activity;metal ion binding;nucleotide binding;transporter activity | 0.07  | 0.07  | 1.00 |
| Q06405 | ATP synthase subunit f, mitochondrial [OS=Saccharomyces cerevisiae S288c]                          | 85198<br>3                | ATP17;<br>YDR377<br>W                           | metabolic process;transport                                                                                        | membrane;mitochondrion                                                 | catalytic activity;transporter activity                                      | 2.981 | 2.981 | 1.00 |
| Q12204 | Probable phospholipase YOR022C, mitochondrial [OS=Saccharomyces cerevisiae S288c]                  | 85418<br>7                | YOR022<br>C;<br>YOR022<br>C                     | metabolic process                                                                                                  | mitochondrion                                                          | catalytic activity;metal ion binding                                         | 0.11  | 0.11  | 1.00 |
| P32606 | putative mitochondrial translation system component PET127 [OS=Saccharomyces cerevisiae S288c]     | 85418<br>2                | PET127;<br>YOR017<br>W                          | cell organization and biogenesis;metabolic process;regulation of biological process                                | mitochondrion                                                          |                                                                              | 0.099 | 0.099 | 1.00 |
| Q05779 | Ubiquinone biosynthesis protein COQ9, mitochondrial [OS=Saccharomyces cerevisiae S288c]            | 85089<br>8                | COQ9;<br>YLR201C                                | metabolic process                                                                                                  | membrane;mitochondrion                                                 |                                                                              | 0.359 | 0.359 | 1.00 |
| Q3E6R5 | uncharacterized mitochondrial outer membrane protein YDR381C-A [OS=Saccharomyces cerevisiae S288c] | 85198<br>9                | YDR381<br>C-A;<br>YDR381<br>C-A                 |                                                                                                                    | membrane;mitochondrion                                                 |                                                                              | 0.389 | 0.389 | 1.00 |
| Q04487 | Mitochondrial inner membrane protein SHH3 [OS=Saccharomyces cerevisiae S288c]                      | 85514<br>5                | SHH3;<br>YMR118<br>C                            | metabolic process                                                                                                  | membrane;mitochondrion                                                 | catalytic activity;metal ion binding                                         | 0.425 | 0.425 | 1.00 |
| Q07821 | Iron-sulfur assembly protein 1 [OS=Saccharomyces cerevisiae S288c]                                 | 85063<br>2                | ISA1;<br>YLL027<br>W                            | cell organization and biogenesis;metabolic process                                                                 | mitochondrion;organelle lumen                                          | metal ion binding;structural molecule activity                               | 0.136 | 0.136 | 1.00 |
| P53157 | Mitochondrial pyruvate carrier 1 [OS=Saccharomyces cerevisiae S288c]                               | 85280<br>0                | FMP37;<br>MPC1;<br>YGL080<br>W                  | transport                                                                                                          | membrane;mitochondrion                                                 | transporter activity                                                         | 1.154 | 1.154 | 1.00 |

|        |                                                                                                   |         |                            |                                                                                                                                       |                                                 |                                                                           |       |       |      |
|--------|---------------------------------------------------------------------------------------------------|---------|----------------------------|---------------------------------------------------------------------------------------------------------------------------------------|-------------------------------------------------|---------------------------------------------------------------------------|-------|-------|------|
| Q12487 | 54S ribosomal protein L23, mitochondrial [OS=Saccharomyces cerevisiae S288c]                      | 854321  | MRPL23; YOR150W            | cell organization and biogenesis;metabolic process                                                                                    | mitochondrion;ribosome;vacuole                  | RNA binding;structural molecule activity                                  | 0.52  | 0.52  | 1.00 |
| Q2V2P9 | Uncharacterized protein YDR119W-A [OS=Saccharomyces cerevisiae S288c]                             | 3799970 | COX26; YDR119W-A           |                                                                                                                                       | membrane;mitochondrion                          |                                                                           | 1.154 | 1.154 | 1.00 |
| P40458 | Autophagy-related protein 32 [OS=Saccharomyces cerevisiae S288c]                                  | 854660  | ATG32; YIL146C             | metabolic process                                                                                                                     | membrane;mitochondrion;vacuole                  | protein binding                                                           | 0.202 | 0.202 | 1.00 |
| P53733 | 37S ribosomal protein S19, mitochondrial [OS=Saccharomyces cerevisiae S288c]                      | 855773  | RSM19; YNR037C             | cell organization and biogenesis;metabolic process                                                                                    | mitochondrion;ribosome                          | RNA binding;structural molecule activity                                  | 0.931 | 0.931 | 1.00 |
| P32939 | GTP-binding protein ypt7 [OS=Saccharomyces cerevisiae S288c]                                      | 855012  | YPT7; YML001W              | cell communication;cell organization and biogenesis;metabolic process;regulation of biological process;response to stimulus;transport | cytosol;endosome;membrane;mitochondrion;vacuole | catalytic activity;nucleotide binding;protein binding                     | 0.166 | 0.166 | 1.00 |
| P09950 | 5-aminolevulinatase synthase, mitochondrial [OS=Saccharomyces cerevisiae S288c]                   | 851818  | HEM1; YDR232W              | metabolic process                                                                                                                     | mitochondrion;organelle lumen                   | catalytic activity                                                        | 0.086 | 0.086 | 1.00 |
| P48526 | Isoleucine--tRNA ligase, mitochondrial [OS=Saccharomyces cerevisiae S288c]                        | 856067  | ISM1; YPL040C              | cell organization and biogenesis;metabolic process;regulation of biological process                                                   | cytoplasm;cytosol;mitochondrion;organelle lumen | catalytic activity;nucleotide binding                                     | 0.04  | 0.04  | 1.00 |
| P53193 | J-type co-chaperone JAC1, mitochondrial [OS=Saccharomyces cerevisiae S288c]                       | 852866  | JAC1; YGL018C              | cell organization and biogenesis;metabolic process;transport                                                                          | membrane;mitochondrion;organelle lumen          | protein binding                                                           | 0.212 | 0.212 | 1.00 |
| P32378 | 4-hydroxybenzoate polyphenyltransferase, mitochondrial [OS=Saccharomyces cerevisiae S288c]        | 855778  | COQ2; YNR041C              | metabolic process;transport                                                                                                           | membrane;mitochondrion                          | catalytic activity                                                        | 0.292 | 0.292 | 1.00 |
| P39515 | mitochondrial import inner membrane translocase subunit Tim17 [OS=Saccharomyces cerevisiae S288c] | 853298  | TIM17; YIL143W             | cell organization and biogenesis;transport                                                                                            | membrane;mitochondrion                          | protein binding;transporter activity                                      | 0.778 | 0.778 | 1.00 |
| P36064 | COX assembly mitochondrial protein [OS=Saccharomyces cerevisiae S288c]                            | 853721  | CMC1; YKL137W              | cell organization and biogenesis                                                                                                      | membrane;mitochondrion                          | metal ion binding                                                         | 0.389 | 0.389 | 1.00 |
| P54857 | lipase 2 [OS=Saccharomyces cerevisiae S288c]                                                      | 851628  | TGL2; YDR058C              | metabolic process;transport                                                                                                           | mitochondrion                                   | catalytic activity                                                        | 0.233 | 0.233 | 1.00 |
| Q06005 | Octanoyltransferase, mitochondrial [OS=Saccharomyces cerevisiae S288c]                            | 850940  | LIP2; YLR239C              | metabolic process                                                                                                                     | cytoplasm;mitochondrion                         | catalytic activity                                                        | 0.116 | 0.116 | 1.00 |
| P38812 | Phosphatidylglycerophosphatase GEP4, mitochondrial [OS=Saccharomyces cerevisiae S288c]            | 856500  | GEP4; YHR100C              | metabolic process                                                                                                                     | membrane;mitochondrion;organelle lumen          | catalytic activity                                                        | 0.179 | 0.179 | 1.00 |
| Q3E846 | Cytochrome c oxidase assembly factor 6 [OS=Saccharomyces cerevisiae S288c]                        | 855287  | COA6; YMR244C-A; YMR244C-A | cell organization and biogenesis;cellular homeostasis;metabolic process;transport                                                     | cytoplasm;membrane;mitochondrion;nucleus        | catalytic activity;metal ion binding;protein binding;transporter activity | 0.931 | 0.931 | 1.00 |
| P03876 | putative COX1/OXI3 intron 2 protein [OS=Saccharomyces cerevisiae S288c]                           | 854594  | AI2; Q0055                 | metabolic process;transport                                                                                                           | mitochondrion                                   | catalytic activity;metal ion binding;transporter activity                 | 0.086 | 0.086 | 1.00 |
| P40491 | ATP synthase assembly factor fmc1, mitochondrial [OS=Saccharomyces cerevisiae S288c]              | 854709  | FMC1; YIL098C              | cell communication;cell organization and biogenesis;metabolic process;response to stimulus                                            | mitochondrion;organelle lumen                   |                                                                           | 0.468 | 0.468 | 1.00 |
| P10174 | cytochrome c oxidase subunit 7 [OS=Saccharomyces cerevisiae S288c]                                | 855298  | COX7; YMR256C              | metabolic process;transport                                                                                                           | membrane;mitochondrion                          | catalytic activity;transporter activity                                   | 1.154 | 1.154 | 1.00 |
| P22135 | Protein ATP12, mitochondrial [OS=Saccharomyces cerevisiae S288c]                                  | 853259  | ATP12; YJL180C             | cell organization and biogenesis                                                                                                      | mitochondrion                                   | protein binding                                                           | 0.101 | 0.101 | 1.00 |
| P53318 | Ubiquinone biosynthesis monooxygenase COQ6, mitochondrial [OS=Saccharomyces cerevisiae S288c]     | 853170  | COQ6; YGR255C              | metabolic process                                                                                                                     | membrane;mitochondrion                          | catalytic activity;nucleotide binding                                     | 0.077 | 0.077 | 1.00 |
| P32463 | Acyl carrier protein, mitochondrial [OS=Saccharomyces cerevisiae S288c]                           | 853642  | ACP1; YKL192C              | metabolic process;transport                                                                                                           | mitochondrion                                   |                                                                           | 0.259 | 0.259 | 1.00 |
| P04039 | Cytochrome c oxidase polypeptide VIII, mitochondrial [OS=Saccharomyces cerevisiae S288c]          | 851111  | COX8; YLR395C              | metabolic process;transport                                                                                                           | membrane;mitochondrion                          | catalytic activity;transporter activity                                   | 0.778 | 0.778 | 1.00 |
| P53212 | Probable transcriptional regulatory protein HAH1 [OS=Saccharomyces cerevisiae S288c]              | 852904  | YGR021W; YGR021W           |                                                                                                                                       | mitochondrion                                   |                                                                           | 0.166 | 0.166 | 1.00 |



|        |                                                                                                   |        |                      |                                                                                                          |                                          |                                                                           |        |        |      |
|--------|---------------------------------------------------------------------------------------------------|--------|----------------------|----------------------------------------------------------------------------------------------------------|------------------------------------------|---------------------------------------------------------------------------|--------|--------|------|
| Q3E7A4 | COX assembly mitochondrial protein 2 [OS=Saccharomyces cerevisiae S288c]                          | 85220  | CMC2; YBL059C-A      | cell organization and biogenesis                                                                         | cytoplasm;membrane;mitochondrion;nucleus | metal ion binding                                                         | 0.389  | 0.389  | 1.00 |
| P81451 | ATP synthase subunit K, mitochondrial [OS=Saccharomyces cerevisiae S288c]                         | 854077 | ATP19; YOL077W-A     | cell organization and biogenesis;metabolic process;transport                                             | membrane;mitochondrion                   | catalytic activity;transporter activity                                   | 1.154  | 1.154  | 1.00 |
| P39103 | Cytochrome c oxidase assembly protein COX14 [OS=Saccharomyces cerevisiae S288c]                   | 854910 | COX14; YML129C       | cell organization and biogenesis;regulation of biological process                                        | membrane;mitochondrion;organelle lumen   | protein binding                                                           | 0.585  | 0.585  | 1.00 |
| P27882 | Mitochondrial FAD-linked sulfhydryl oxidase erv1 [OS=Saccharomyces cerevisiae S288c]              | 852916 | ERV1; YGR029W        | cellular homeostasis;metabolic process;response to stimulus;transport                                    | mitochondrion                            | catalytic activity;protein binding                                        | 0.212  | 0.212  | 1.00 |
| P53320 | Mitochondrial carrier protein MTM1 [OS=Saccharomyces cerevisiae S288c]                            | 853173 | MTM1; YGR257C        | metabolic process;transport                                                                              | membrane;mitochondrion                   | structural molecule activity                                              | 0.11   | 0.11   | 1.00 |
| P53312 | Succinyl-CoA ligase [ADP-forming] subunit beta, mitochondrial [OS=Saccharomyces cerevisiae S288c] | 853159 | LSC2; YGR244C        | metabolic process                                                                                        | mitochondrion                            | catalytic activity;nucleotide binding                                     | 7.003  | 7.62   | 1.09 |
| P07256 | Cytochrome b-c1 complex subunit 1, mitochondrial [OS=Saccharomyces cerevisiae S288c]              | 852235 | COR1; YBL045C        | metabolic process;transport                                                                              | membrane;mitochondrion                   | catalytic activity;metal ion binding;protein binding;transporter activity | 9.89   | 11.915 | 1.20 |
| P08067 | cytochrome b-c1 complex subunit Rieske, mitochondrial [OS=Saccharomyces cerevisiae S288c]         | 856689 | RIP1; YEL024W        | metabolic process;transport                                                                              | membrane;mitochondrion                   | catalytic activity;metal ion binding;transporter activity                 | 25.102 | 30.623 | 1.22 |
| P40508 | Uncharacterized protein YIL077C [OS=Saccharomyces cerevisiae S288c]                               | 854733 | YIL077C; YIL077C     |                                                                                                          | mitochondrion                            |                                                                           | 1.154  | 1.448  | 1.25 |
| P10834 | protein PET54 [OS=Saccharomyces cerevisiae S288c]                                                 | 853137 | PET54; YGR222W       | metabolic process;regulation of biological process                                                       | membrane;mitochondrion;organelle lumen   | nucleotide binding;RNA binding;translation regulator activity             | 0.688  | 0.874  | 1.27 |
| P40364 | Mitochondrial peculiar membrane protein 1 [OS=Saccharomyces cerevisiae S288c]                     | 853379 | MPM1; YJL066C        |                                                                                                          | membrane;mitochondrion                   |                                                                           | 1.512  | 1.929  | 1.28 |
| P00427 | Cytochrome c oxidase subunit 6, mitochondrial [OS=Saccharomyces cerevisiae S288c]                 | 856448 | COX6; YHR051W        | metabolic process;transport                                                                              | membrane;mitochondrion                   | catalytic activity;metal ion binding;transporter activity                 | 2.831  | 3.642  | 1.29 |
| Q12298 | uncharacterized ABC transporter ATP-binding protein YDR061W [OS=Saccharomyces cerevisiae S288c]   | 851633 | YDR061W; YDR061W     |                                                                                                          | mitochondrion                            | catalytic activity;nucleotide binding                                     | 0.266  | 0.343  | 1.29 |
| P39952 | Mitochondrial inner membrane protein OXA1 [OS=Saccharomyces cerevisiae S288c]                     | 856898 | OXA1; YER154W        | cell organization and biogenesis;transport                                                               | membrane;mitochondrion                   | transporter activity                                                      | 1.054  | 1.371  | 1.30 |
| Q08970 | Mitochondrial metal transporter 2 [OS=Saccharomyces cerevisiae S288c]                             | 855877 | MMT2; YPL224C        | cellular homeostasis;regulation of biological process;response to stimulus;transport                     | membrane;mitochondrion                   | transporter activity                                                      | 0.407  | 0.532  | 1.31 |
| P53230 | Phosphatidate cytidyltransferase, mitochondrial [OS=Saccharomyces cerevisiae S288c]               | 852937 | TAM41; YGR046W       | metabolic process                                                                                        | membrane;mitochondrion;organelle lumen   | catalytic activity                                                        | 0.407  | 0.532  | 1.31 |
| P36775 | Lon protease homolog, mitochondrial [OS=Saccharomyces cerevisiae S288c]                           | 852259 | PIM1; YBL022C        | cell organization and biogenesis;metabolic process;regulation of biological process;response to stimulus | cytoplasm;mitochondrion;organelle lumen  | catalytic activity;DNA binding;nucleotide binding;RNA binding             | 0.685  | 0.905  | 1.32 |
| P53220 | Mitochondrial import inner membrane translocase subunit TIM21 [OS=Saccharomyces cerevisiae S288c] | 852921 | TIM21; YGR033C       | cell organization and biogenesis;transport                                                               | membrane;mitochondrion                   | protein binding                                                           | 0.719  | 0.968  | 1.35 |
| P39722 | Mitochondrial Rho GTPase 1 [OS=Saccharomyces cerevisiae S288c]                                    | 851249 | GEM1; YAL048C        | cell organization and biogenesis;regulation of biological process;response to stimulus;transport         | membrane;mitochondrion                   | catalytic activity;metal ion binding;nucleotide binding                   | 0.189  | 0.259  | 1.37 |
| P50087 | MICOS subunit MIC26 [OS=Saccharomyces cerevisiae S288c]                                           | 853150 | MOS2; MIC26; YGR235C | cell organization and biogenesis                                                                         | membrane;mitochondrion                   |                                                                           | 0.931  | 1.276  | 1.37 |
| P25039 | Elongation factor G, mitochondrial [OS=Saccharomyces cerevisiae S288c]                            | 850758 | MEF1; YLR069C        | cell organization and biogenesis;metabolic process                                                       | cytosol;mitochondrion                    | catalytic activity;nucleotide binding;RNA binding                         | 0.151  | 0.207  | 1.37 |
| Q08245 | protein ZEO1 [OS=Saccharomyces cerevisiae S288c]                                                  | 854040 | ZEO1; YOL109W        | cell organization and biogenesis                                                                         | membrane;mitochondrion                   | protein binding                                                           | 2.162  | 2.981  | 1.38 |
| P38705 | Serine--tRNA ligase, mitochondrial [OS=Saccharomyces cerevisiae S288c]                            | 856402 | DIA4; YHR011W        | metabolic process                                                                                        | cytoplasm;mitochondrion;organelle lumen  | catalytic activity;nucleotide binding                                     | 0.233  | 0.322  | 1.38 |

|        |                                                                                                   |        |                        |                                                                                   |                                              |                                                                                        |       |       |      |
|--------|---------------------------------------------------------------------------------------------------|--------|------------------------|-----------------------------------------------------------------------------------|----------------------------------------------|----------------------------------------------------------------------------------------|-------|-------|------|
| Q03557 | Glutamyl-tRNA(Gln) amidotransferase subunit A, mitochondrial [OS=Saccharomyces cerevisiae S288c]  | 85538  | HER2; YMR293C          | cell organization and biogenesis;metabolic process                                | mitochondrion                                | catalytic activity;nucleotide binding                                                  | 0.259 | 0.359 | 1.39 |
| P47150 | 37S ribosomal protein S7, mitochondrial [OS=Saccharomyces cerevisiae S288c]                       | 85358  | RSM7; YJR113C          | cell organization and biogenesis;metabolic process                                | mitochondrion;ribosome                       | RNA binding;structural molecule activity                                               | 0.334 | 0.468 | 1.40 |
| P00424 | Cytochrome c oxidase polypeptide 5A, mitochondrial [OS=Saccharomyces cerevisiae S288c]            | 855675 | COX5A; YNL052W         | metabolic process;transport                                                       | membrane;mitochondrion                       | catalytic activity;transporter activity                                                | 1.31  | 1.848 | 1.41 |
| P43594 | MICOS complex subunit MIC19 [OS=Saccharomyces cerevisiae S288c]                                   | 850563 | AIM13; MIC19; YFR011C  | cell organization and biogenesis                                                  | cytoplasm;membrane;mitochondrion             |                                                                                        | 1.31  | 1.848 | 1.41 |
| P19516 | Cytochrome c oxidase assembly protein COX11, mitochondrial [OS=Saccharomyces cerevisiae S288c]    | 855971 | COX11; YPL132W         | cell organization and biogenesis;metabolic process                                | membrane;mitochondrion;ribosome              | metal ion binding                                                                      | 0.438 | 0.624 | 1.42 |
| P38910 | 10 kDa heat shock protein, mitochondrial [OS=Saccharomyces cerevisiae S288c]                      | 854185 | HSP10; YOR020C         | cell organization and biogenesis;metabolic process;response to stimulus;transport | cytoplasm;mitochondrion;organelle lumen      | metal ion binding;nucleotide binding;protein binding                                   | 3.217 | 4.623 | 1.44 |
| P39525 | 3-oxoacyl-[acyl-carrier-protein] synthase homolog [OS=Saccharomyces cerevisiae S288c]             | 856790 | CEM1; YER061C          | metabolic process                                                                 | mitochondrion                                | catalytic activity                                                                     | 1.081 | 1.565 | 1.45 |
| Q02950 | 37S ribosomal protein MRP51, mitochondrial [OS=Saccharomyces cerevisiae S288c]                    | 855985 | MRP51; YPL118W         | cell organization and biogenesis;metabolic process                                | mitochondrion;ribosome                       | structural molecule activity                                                           | 0.668 | 0.978 | 1.46 |
| P10662 | 37S ribosomal protein MRP1, mitochondrial [OS=Saccharomyces cerevisiae S288c]                     | 851948 | MRP1; YDR347W          | cell organization and biogenesis;metabolic process;response to stimulus           | mitochondrion;ribosome                       | antioxidant activity;catalytic activity;metal ion binding;structural molecule activity | 1.239 | 1.818 | 1.47 |
| P39965 | probable proline--tRNA ligase, mitochondrial [OS=Saccharomyces cerevisiae S288c]                  | 856820 | AIM10; YER087W         | metabolic process                                                                 | cytoplasm;mitochondrion                      | catalytic activity;nucleotide binding;RNA binding                                      | 0.125 | 0.194 | 1.55 |
| P29704 | squalene synthase [OS=Saccharomyces cerevisiae S288c]                                             | 856597 | ERG9; YHR190W          | metabolic process                                                                 | endoplasmic reticulum;membrane;mitochondrion | catalytic activity                                                                     | 0.222 | 0.35  | 1.58 |
| Q06485 | Autophagy-related protein 33 [OS=Saccharomyces cerevisiae S288c]                                  | 851070 | ATG33; YLR356W         | cell communication;metabolic process;response to stimulus                         | membrane;mitochondrion                       |                                                                                        | 1.371 | 2.162 | 1.58 |
| Q04689 | Altered inheritance of mitochondria protein 32 [OS=Saccharomyces cerevisiae S288c]                | 854955 | AIM32; YML050W         |                                                                                   | mitochondrion                                |                                                                                        | 0.233 | 0.369 | 1.58 |
| P36534 | 54S ribosomal protein L40, mitochondrial [OS=Saccharomyces cerevisiae S288c]                      | 855930 | MRPL40; YPL173W        | cell organization and biogenesis;metabolic process                                | mitochondrion;ribosome                       | protein binding;structural molecule activity                                           | 0.778 | 1.239 | 1.59 |
| P41735 | 5-demethoxyubiquinone hydroxylase, mitochondrial [OS=Saccharomyces cerevisiae S288c]              | 854292 | CAT5; YOR125C          | metabolic process                                                                 | membrane;mitochondrion                       | catalytic activity;metal ion binding                                                   | 0.334 | 0.54  | 1.62 |
| Q96VH5 | MICOS complex subunit Mic10 [OS=Saccharomyces cerevisiae S288c]                                   | 850300 | MOS1; MIC10; YCL057C-A | cell organization and biogenesis                                                  | membrane;mitochondrion                       |                                                                                        | 1.683 | 2.728 | 1.62 |
| P00942 | Triosephosphate isomerase [OS=Saccharomyces cerevisiae S288c]                                     | 851620 | TPI1; YDR050C          | metabolic process                                                                 | cytoplasm;cytosol;membrane;mitochondrion     | catalytic activity                                                                     | 0.425 | 0.701 | 1.65 |
| Q03201 | 37S ribosomal protein S10, mitochondrial [OS=Saccharomyces cerevisiae S288c]                      | 851611 | RSM10; YDR041W         | cell organization and biogenesis;metabolic process                                | mitochondrion;ribosome                       | structural molecule activity                                                           | 0.425 | 0.701 | 1.65 |
| P40515 | Mitochondria fission 1 protein [OS=Saccharomyces cerevisiae S288c]                                | 854745 | FIS1; YIL065C          | cell death;cell organization and biogenesis;regulation of biological process      | membrane;mitochondrion                       | protein binding                                                                        | 0.468 | 0.778 | 1.66 |
| P00425 | Cytochrome c oxidase polypeptide 5B, mitochondrial [OS=Saccharomyces cerevisiae S288c]            | 854695 | COX5B; YIL111W         | metabolic process;transport                                                       | membrane;mitochondrion                       | catalytic activity;transporter activity                                                | 0.52  | 0.874 | 1.68 |
| P42949 | Mitochondrial import inner membrane translocase subunit TIM16 [OS=Saccharomyces cerevisiae S288c] | 853340 | PAM16; YJL104W         | transport                                                                         | membrane;mitochondrion                       | protein binding                                                                        | 0.52  | 0.874 | 1.68 |
| P33759 | 37S ribosomal protein S5, mitochondrial [OS=Saccharomyces cerevisiae S288c]                       | 852553 | MRP55; YBR251W         | cell organization and biogenesis;metabolic process                                | mitochondrion;ribosome                       | RNA binding;structural molecule activity                                               | 0.413 | 0.778 | 1.88 |
| P81450 | ATP synthase subunit J, mitochondrial [OS=Saccharomyces cerevisiae S288c]                         | 854893 | ATP18; YML081C-A       | cell organization and biogenesis;metabolic process;transport                      | membrane;mitochondrion                       | catalytic activity;transporter activity                                                | 4.623 | 9     | 1.95 |

|        |                                                                                                   |        |                         |                                                                                              |                                         |                                                              |       |        |       |
|--------|---------------------------------------------------------------------------------------------------|--------|-------------------------|----------------------------------------------------------------------------------------------|-----------------------------------------|--------------------------------------------------------------|-------|--------|-------|
| P34231 | Uncharacterized protein YKL187C [OS=Saccharomyces cerevisiae S288c]                               | 853648 | FAT3; YKL187C ; YKL187C | cell organization and biogenesis;transport                                                   | membrane;mitochondrion                  |                                                              | 0.093 | 0.194  | 2.09  |
| P50110 | Sorting assembly machinery 37 kDa subunit [OS=Saccharomyces cerevisiae S288c]                     | 855082 | SAM37; YMR060C          | cell organization and biogenesis;transport                                                   | membrane;mitochondrion                  | protein binding                                              | 0.116 | 0.245  | 2.11  |
| P38816 | thioredoxin reductase 2, mitochondrial [OS=Saccharomyces cerevisiae S288c]                        | 856506 | TRR2; YHR106W           | cellular homeostasis;metabolic process;regulation of biological process;response to stimulus | cytoplasm;mitochondrion                 | antioxidant activity;catalytic activity                      | 0.136 | 0.292  | 2.15  |
| P43122 | tRNA N6-adenosine threonylcarbamoyltransferase, mitochondrial [OS=Saccharomyces cerevisiae S288c] | 851454 | QRI7; YDL104C           | cell organization and biogenesis;metabolic process                                           | mitochondrion                           | catalytic activity;metal ion binding                         | 0.212 | 0.468  | 2.21  |
| P49334 | Mitochondrial import receptor subunit tom22 [OS=Saccharomyces cerevisiae S288c]                   | 855592 | TOM22; YNL131W          | cell organization and biogenesis;transport                                                   | membrane;mitochondrion                  | protein binding;transporter activity                         | 0.292 | 0.668  | 2.29  |
| Q12032 | Altered inheritance of mitochondria protein 41, mitochondrial [OS=Saccharomyces cerevisiae S288c] | 854390 | AIM41; YOR215C          |                                                                                              | mitochondrion                           | catalytic activity                                           | 1.154 | 2.831  | 2.45  |
| P01097 | ATPase inhibitor, mitochondrial [OS=Saccharomyces cerevisiae S288c]                               | 851347 | INH1; YDL181W           | metabolic process;regulation of biological process                                           | mitochondrion                           | catalytic activity;enzyme regulator activity;protein binding | 0.468 | 1.154  | 2.47  |
| P36525 | 54S ribosomal protein L24, mitochondrial [OS=Saccharomyces cerevisiae S288c]                      | 855231 | MRPL24; YMR193W         | cell organization and biogenesis;metabolic process                                           | mitochondrion;ribosome                  | RNA binding;structural molecule activity                     | 1.154 | 2.981  | 2.58  |
| Q03713 | Respiratory supercomplex factor 1, mitochondrial [OS=Saccharomyces cerevisiae S288c]              | 854978 | RCF1; YML030W           | cell organization and biogenesis                                                             | membrane;mitochondrion                  |                                                              | 1.512 | 4.012  | 2.65  |
| P13433 | DNA-directed RNA polymerase, mitochondrial [OS=Saccharomyces cerevisiae S288c]                    | 850507 | RPO41; YFL036W          | cell organization and biogenesis;metabolic process                                           | cytoplasm;mitochondrion;organelle lumen | catalytic activity;DNA binding                               | 0.027 | 0.085  | 3.15  |
| P35996 | 54S ribosomal protein L38, mitochondrial [OS=Saccharomyces cerevisiae S288c]                      | 853684 | MRPL38; YKL170W         | cell organization and biogenesis;metabolic process                                           | mitochondrion;ribosome                  | RNA binding;structural molecule activity                     | 1.154 | 3.642  | 3.16  |
| P21771 | 37S ribosomal protein S28, mitochondrial [OS=Saccharomyces cerevisiae S288c]                      | 851937 | MRPS28 ; YDR337W        | cell organization and biogenesis;metabolic process                                           | mitochondrion;ribosome                  | RNA binding;structural molecule activity                     | 0.624 | 1.976  | 3.17  |
| P00045 | Cytochrome c iso-2 [OS=Saccharomyces cerevisiae S288c]                                            | 856672 | CYC7; YEL039C           | metabolic process;transport                                                                  | mitochondrion                           | metal ion binding                                            | 1.512 | 6.943  | 4.59  |
| P07255 | Cytochrome c oxidase subunit 7A [OS=Saccharomyces cerevisiae S288c]                               | 851492 | COX9; YDL067C           | metabolic process;transport                                                                  | membrane;mitochondrion                  | catalytic activity;transporter activity                      | 1.154 | 20.544 | 17.80 |

**Supplemental Table S4. The relative concentrations of proteins in mitochondria purified from WT or *ups1Δ* cells cultured without LCA.** Mitochondria were purified from WT or *ups1Δ* cells recovered on day 2 of cell culturing without LCA. Mass spectrometry-based identification and quantitation of proteins recovered in purified mitochondria were performed as described in Materials and methods. The exponentially modified protein abundance index (emPAI) provided by the "Proteome Discoverer" software was used to calculate the relative abundance of mitochondrial proteins between specified datasets. Data on the relative concentrations of mitochondrial proteins are presented as means of 2 independent experiments.

| Accession | Description                                                                                                        | Entrez Gene ID | Gene ID               | Biological Process                                                                    | Cellular Component                        | Molecular Function                                              | emPAI WT | emPAI <i>ups1</i> | Ratio <i>ups1</i> WT |
|-----------|--------------------------------------------------------------------------------------------------------------------|----------------|-----------------------|---------------------------------------------------------------------------------------|-------------------------------------------|-----------------------------------------------------------------|----------|-------------------|----------------------|
| P10834    | protein PET54                                                                                                      | 853137         | PET54                 | metabolic process; regulation of biological process                                   | membrane; mitochondrion; organelle lumen  | nucleotide binding; RNA binding; translation regulator activity | 0.874    | 0.11              | 0.13                 |
| P12687    | 54S ribosomal protein L2, mitochondrial [OS= <i>Saccharomyces cerevisiae</i> S288c]                                | 855727         | MRP7; YNL005C         | cell organization and biogenesis; metabolic process                                   | mitochondrion; ribosome                   | catalytic activity; RNA binding; structural molecule activity   | 1.848    | 0.233             | 0.13                 |
| Q06892    | NADH kinase POSS, mitochondrial [OS= <i>Saccharomyces cerevisiae</i> S288c]                                        | 855913         | POSS; YPL188W         | metabolic process; response to stimulus                                               | mitochondrion; organelle lumen            | catalytic activity; nucleotide binding                          | 2.511    | 0.369             | 0.15                 |
| P42847    | 37S ribosomal protein S18, mitochondrial [OS= <i>Saccharomyces cerevisiae</i> S288c]                               | 855410         | MRPS18; YNL306W       | cell organization and biogenesis; metabolic process                                   | mitochondrion; ribosome                   | RNA binding; structural molecule activity                       | 1.054    | 0.155             | 0.15                 |
| P46998    | mitochondrial membrane protein FMP33 [OS= <i>Saccharomyces cerevisiae</i> S288c]                                   | 853279         | FMP33; YJL161W        |                                                                                       | membrane; mitochondrion                   |                                                                 | 2.162    | 0.334             | 0.15                 |
| P21771    | 37S ribosomal protein S28, mitochondrial [OS= <i>Saccharomyces cerevisiae</i> S288c]                               | 851937         | MRPS28; YDR337W       | cell organization and biogenesis; metabolic process                                   | mitochondrion; ribosome                   | RNA binding; structural molecule activity                       | 0.833    | 0.129             | 0.15                 |
| P43594    | MICOS complex subunit MIC19 [OS= <i>Saccharomyces cerevisiae</i> S288c]                                            | 850563         | AIM13; MIC19; YFR011C | cell organization and biogenesis                                                      | cytoplasm; membrane; mitochondrion        |                                                                 | 3.329    | 0.52              | 0.16                 |
| P40364    | Mitochondrial peculiar membrane protein 1 [OS= <i>Saccharomyces cerevisiae</i> S288c]                              | 853379         | MPM1; YJL066C         |                                                                                       | membrane; mitochondrion                   |                                                                 | 3.642    | 0.585             | 0.16                 |
| P53170    | [Pyruvate dehydrogenase (acetyl-transferring)] kinase 2, mitochondrial [OS= <i>Saccharomyces cerevisiae</i> S288c] | 852821         | PKP2; YGL059W         | metabolic process; regulation of biological process                                   | mitochondrion; organelle lumen            | catalytic activity; nucleotide binding; protein binding         | 1.096    | 0.179             | 0.16                 |
| P47150    | 37S ribosomal protein S7, mitochondrial [OS= <i>Saccharomyces cerevisiae</i> S288c]                                | 853578         | RSM7; YJR113C         | cell organization and biogenesis; metabolic process                                   | mitochondrion; ribosome                   | RNA binding; structural molecule activity                       | 0.616    | 0.101             | 0.16                 |
| Q03557    | Glutamyl-tRNA(Gln) amidotransferase subunit A, mitochondrial [OS= <i>Saccharomyces cerevisiae</i> S288c]           | 855338         | HER2; YMR293C         | cell organization and biogenesis; metabolic process                                   | mitochondrion                             | catalytic activity; nucleotide binding                          | 0.468    | 0.08              | 0.17                 |
| P32445    | Single-stranded DNA-binding protein RIM1, mitochondrial [OS= <i>Saccharomyces cerevisiae</i> S288c]                | 850395         | RIM1; YCR028C-A       | cell organization and biogenesis; metabolic process; regulation of biological process | mitochondrion                             | DNA binding                                                     | 6.743    | 1.154             | 0.17                 |
| P02381    | Ribosomal protein VAR1, mitochondrial [OS= <i>Saccharomyces cerevisiae</i> S288c]                                  | 854586         | VAR1; Q0140           | cell organization and biogenesis; metabolic process                                   | mitochondrion; ribosome                   | structural molecule activity                                    | 1.31     | 0.233             | 0.18                 |
| Q01217    | Protein ARG5,6, mitochondrial [OS= <i>Saccharomyces cerevisiae</i> S288c]                                          | 856800         | ARG5,6; YER069W       | metabolic process; regulation of biological process                                   | cytoplasm; mitochondrion; organelle lumen | catalytic activity; nucleotide binding; protein binding         | 0.458    | 0.087             | 0.19                 |
| P39525    | 3-oxoacyl-[acyl-carrier-protein] synthase homolog [OS= <i>Saccharomyces cerevisiae</i> S288c]                      | 856790         | CEM1; YER061C         | metabolic process                                                                     | mitochondrion                             | catalytic activity                                              | 1.848    | 0.369             | 0.20                 |
| Q12283    | Malonyl CoA-acyl carrier protein transacylase, mitochondrial [OS= <i>Saccharomyces cerevisiae</i> S288c]           | 854396         | MCT1; YOR221C         | metabolic process                                                                     | mitochondrion                             | catalytic activity                                              | 0.668    | 0.136             | 0.20                 |
| P25372    | Thioredoxin-3, mitochondrial [OS= <i>Saccharomyces cerevisiae</i> S288c]                                           | 850444         | TRX3; YCR083          | cellular homeostasis; metabolic                                                       | cytoplasm; mitochondrion                  | catalytic activity                                              | 2.511    | 0.52              | 0.21                 |

|        |                                                                                                     |        |                   |                                                                                                          |                                              |                                                                 |        |       |      |
|--------|-----------------------------------------------------------------------------------------------------|--------|-------------------|----------------------------------------------------------------------------------------------------------|----------------------------------------------|-----------------------------------------------------------------|--------|-------|------|
|        | S288c]                                                                                              |        | W                 | process;regulation of biological process;response to stimulus;transport                                  |                                              |                                                                 |        |       |      |
| P33416 | Heat shock protein 78, mitochondrial [OS=Saccharomyces cerevisiae S288c]                            | 851845 | HSP78; YDR258C    | cell organization and biogenesis;metabolic process;regulation of biological process;response to stimulus | mitochondrion;organelle lumen                | catalytic activity;nucleotide binding;protein binding           | 12.525 | 2.609 | 0.21 |
| P38122 | 3-methyl-2-oxobutanoate hydroxymethyltransferase [OS=Saccharomyces cerevisiae S288c]                | 852474 | ECM31; YBR176 W   | metabolic process                                                                                        | mitochondrion                                | catalytic activity                                              | 0.585  | 0.122 | 0.21 |
| P32331 | Carrier protein YMC1, mitochondrial [OS=Saccharomyces cerevisiae S288c]                             | 856171 | YMC1; YPR058 W    | metabolic process;transport                                                                              | membrane;mitochondrion;vacuole               | structural molecule activity;transporter activity               | 2.384  | 0.501 | 0.21 |
| P00447 | Superoxide dismutase [Mn], mitochondrial [OS=Saccharomyces cerevisiae S288c]                        | 856399 | SOD2; YHR008C     | metabolic process;response to stimulus                                                                   | mitochondrion;organelle lumen                | antioxidant activity;catalytic activity;metal ion binding       | 9      | 1.894 | 0.21 |
| P49017 | 2-methoxy-6-polyprenyl-1,4-benzoquinol methylase, mitochondrial [OS=Saccharomyces cerevisiae S288c] | 854930 | COQ5; YML110C     | metabolic process                                                                                        | membrane;mitochondrion;organelle lumen       | catalytic activity                                              | 0.551  | 0.116 | 0.21 |
| P36528 | 54S ribosomal protein L17, mitochondrial [OS=Saccharomyces cerevisiae S288c]                        | 855469 | MRPL17; YNL252C   | cell organization and biogenesis;metabolic process                                                       | mitochondrion;ribosome                       | structural molecule activity                                    | 0.52   | 0.11  | 0.21 |
| P22135 | Protein ATP12, mitochondrial [OS=Saccharomyces cerevisiae S288c]                                    | 853259 | ATP12; YJL180C    | cell organization and biogenesis                                                                         | mitochondrion                                | protein binding                                                 | 0.468  | 0.101 | 0.22 |
| P53305 | Mitochondrial 37S ribosomal protein S27 [OS=Saccharomyces cerevisiae S288c]                         | 853129 | RSM27; YGR215 W   | cell organization and biogenesis;metabolic process                                                       | mitochondrion;ribosome                       | structural molecule activity                                    | 2.162  | 0.468 | 0.22 |
| P11325 | Leucine--tRNA ligase, mitochondrial [OS=Saccharomyces cerevisiae S288c]                             | 851098 | NAM2; YLR382C     | cell organization and biogenesis;metabolic process;regulation of biological process                      | cytosol;mitochondrion;organelle lumen        | catalytic activity;nucleotide binding;RNA binding               | 0.353  | 0.078 | 0.22 |
| P18496 | Mitochondrial ATPase complex subunit ATP10 [OS=Saccharomyces cerevisiae S288c]                      | 851109 | ATP10; YLR393 W   | cell organization and biogenesis                                                                         | cytoplasm;membrane;mitochondrion             | protein binding                                                 | 1.818  | 0.413 | 0.23 |
| P25375 | Saccharolysin [OS=Saccharomyces cerevisiae S288c]                                                   | 850301 | PRD1; YCL057 W    | metabolic process                                                                                        | cytoplasm;Golgi;mitochondrion;vacuole        | catalytic activity;metal ion binding                            | 0.216  | 0.05  | 0.23 |
| P19955 | 37S ribosomal protein YMR-31, mitochondrial [OS=Saccharomyces cerevisiae S288c]                     | 850610 | YMR31; YFR049 W   | cell organization and biogenesis;metabolic process                                                       | mitochondrion;ribosome                       | catalytic activity;protein binding;structural molecule activity | 15.681 | 3.642 | 0.23 |
| P32898 | Mitochondrial presequence protease [OS=Saccharomyces cerevisiae S288c]                              | 852041 | CYM1; YDR430C     | metabolic process                                                                                        | mitochondrion                                | catalytic activity;metal ion binding                            | 2.162  | 0.505 | 0.23 |
| P25605 | Acetolactate synthase small subunit, mitochondrial [OS=Saccharomyces cerevisiae S288c]              | 850348 | ILV6; YCL009C     | metabolic process;regulation of biological process                                                       | mitochondrion                                | catalytic activity;enzyme regulator activity                    | 11.743 | 2.793 | 0.24 |
| P81450 | ATP synthase subunit J, mitochondrial [OS=Saccharomyces cerevisiae S288c]                           | 854893 | ATP18; YML081C -A | cell organization and biogenesis;metabolic process;transport                                             | membrane;mitochondrion                       | catalytic activity;transporter activity                         | 9      | 2.162 | 0.24 |
| Q03430 | 37S ribosomal protein RSM28, mitochondrial [OS=Saccharomyces cerevisiae S288c]                      | 852105 | RSM28; YDR494 W   | cell organization and biogenesis;metabolic process                                                       | mitochondrion;ribosome                       | structural molecule activity                                    | 2.675  | 0.65  | 0.24 |
| Q12305 | Thiosulfate sulfurtransferase RDL1, mitochondrial [OS=Saccharomyces cerevisiae S288c]               | 854459 | RDL1; YOR285 W    |                                                                                                          | endoplasmic reticulum;membrane;mitochondrion | catalytic activity                                              | 1.154  | 0.292 | 0.25 |
| P19516 | Cytochrome c oxidase assembly protein COX11, mitochondrial [OS=Saccharomyces cerevisiae S288c]      | 855971 | COX11; YPL132 W   | cell organization and biogenesis;metabolic process                                                       | membrane;mitochondrion;ribosome              | metal ion binding                                               | 1.069  | 0.274 | 0.26 |
| P35996 | 54S ribosomal protein L38, mitochondrial [OS=Saccharomyces cerevisiae S288c]                        | 853684 | MRPL38; YKL170 W  | cell organization and biogenesis;metabolic process                                                       | mitochondrion;ribosome                       | RNA binding;structural molecule activity                        | 2.594  | 0.668 | 0.26 |
| P36516 | 54S ribosomal protein L3, mitochondrial [OS=Saccharomyces cerevisiae S288c]                         | 855039 | MRPL3; YMR024 W   | cell organization and biogenesis;metabolic process;response to stimulus                                  | mitochondrion;nucleus;ribosome               | catalytic activity;RNA binding;structural molecule activity     | 1.043  | 0.269 | 0.26 |
| P37293 | N-terminal acetyltransferase 2 [OS=Saccharomyces cerevisiae S288c]                                  | 853050 | NAT2; YGR147C     | metabolic process                                                                                        | cytoplasm;mitochondrion                      | catalytic activity                                              | 0.931  | 0.245 | 0.26 |
| P38523 | GrpE protein homolog, mitochondrial [OS=Saccharomyces cerevisiae S288c]                             | 854407 | MGE1; YOR232 W    | metabolic process;regulation of biological process;transport                                             | membrane;mitochondrion;organelle lumen       | enzyme regulator activity;nucleotide binding;protein binding    | 2.36   | 0.624 | 0.26 |

|        |                                                                                                   |        |                  |                                                                                                          |                                         |                                                                   |        |       |      |
|--------|---------------------------------------------------------------------------------------------------|--------|------------------|----------------------------------------------------------------------------------------------------------|-----------------------------------------|-------------------------------------------------------------------|--------|-------|------|
| P36534 | 54S ribosomal protein L40, mitochondrial [OS=Saccharomyces cerevisiae S288c]                      | 855930 | MRPL40; YPL173 W | cell organization and biogenesis;metabolic process                                                       | mitochondrion;ribosome                  | protein binding;structural molecule activity                      | 1.512  | 0.413 | 0.27 |
| P53881 | 54S ribosomal protein L22, mitochondrial [OS=Saccharomyces cerevisiae S288c]                      | 855544 | MRPL22; YNL177C  | cell organization and biogenesis;metabolic process                                                       | mitochondrion;ribosome                  | RNA binding;structural molecule activity                          | 1.994  | 0.551 | 0.28 |
| P32799 | Cytochrome c oxidase subunit 6A, mitochondrial [OS=Saccharomyces cerevisiae S288c]                | 852684 | COX13; YGL191 W  | cell organization and biogenesis;metabolic process;regulation of biological process;transport            | membrane;mitochondrion                  | catalytic activity;enzyme regulator activity;transporter activity | 18.953 | 5.31  | 0.28 |
| Q06630 | Mitochondrial homologous recombination protein 1 [OS=Saccharomyces cerevisiae S288c]              | 851890 | MHR1; YDR296 W   | cell organization and biogenesis;metabolic process;regulation of biological process;response to stimulus | mitochondrion;nucleus                   | catalytic activity;DNA binding;structural molecule activity       | 0.585  | 0.166 | 0.28 |
| P32897 | Mitochondrial import inner membrane translocase subunit tim23 [OS=Saccharomyces cerevisiae S288c] | 855751 | TIM23; YNR017 W  | transport                                                                                                | membrane;mitochondrion                  | protein binding;transporter activity                              | 5.31   | 1.512 | 0.28 |
| P36519 | 54S ribosomal protein L7, mitochondrial [OS=Saccharomyces cerevisiae S288c]                       | 851823 | MRPL7; YDR237 W  | cell organization and biogenesis;metabolic process                                                       | mitochondrion;ribosome                  | RNA binding;structural molecule activity                          | 0.468  | 0.136 | 0.29 |
| P40165 | NAD(P)H-hydrate epimerase [OS=Saccharomyces cerevisiae S288c]                                     | 855521 | NNR1; YNL200C    | metabolic process                                                                                        | cytoplasm;mitochondrion                 | catalytic activity;metal ion binding;nucleotide binding           | 1.61   | 0.468 | 0.29 |
| Q12032 | Altered inheritance of mitochondria protein 41, mitochondrial [OS=Saccharomyces cerevisiae S288c] | 854390 | AIM41; YOR215C   |                                                                                                          | mitochondrion                           | catalytic activity                                                | 1.61   | 0.468 | 0.29 |
| P27697 | Atypical kinase COQ8, mitochondrial [OS=Saccharomyces cerevisiae S288c]                           | 852758 | COQ8; YGL119 W   | metabolic process                                                                                        | membrane;mitochondrion;organelle lumen  | catalytic activity;nucleotide binding                             | 0.453  | 0.133 | 0.29 |
| P36139 | protein PET10 [OS=Saccharomyces cerevisiae S288c]                                                 | 853920 | PET10; YKR046C   | metabolic process                                                                                        | membrane                                |                                                                   | 0.413  | 0.122 | 0.30 |
| Q12165 | ATP synthase subunit delta, mitochondrial [OS=Saccharomyces cerevisiae S288c]                     | 851560 | ATP16; YDL004 W  | metabolic process;transport                                                                              | membrane;mitochondrion                  | catalytic activity;transporter activity                           | 4.623  | 1.371 | 0.30 |
| Q07534 | Solute carrier family 25 member 38 homolog [OS=Saccharomyces cerevisiae S288c]                    | 851439 | HEM25; YDL119C   | metabolic process;transport                                                                              | membrane;mitochondrion                  | structural molecule activity;transporter activity                 | 0.389  | 0.116 | 0.30 |
| P40035 | Mitochondrial phosphate carrier protein 2 [OS=Saccharomyces cerevisiae S288c]                     | 856779 | PIC2; YER053C    | cellular homeostasis;metabolic process;transport                                                         | membrane;mitochondrion                  | structural molecule activity;transporter activity                 | 2.793  | 0.833 | 0.30 |
| P25626 | 54S ribosomal protein IMG1, mitochondrial [OS=Saccharomyces cerevisiae S288c]                     | 850413 | IMG1; YCR046C    | cell organization and biogenesis;metabolic process                                                       | mitochondrion;ribosome                  | structural molecule activity                                      | 1.424  | 0.425 | 0.30 |
| Q03201 | 37S ribosomal protein S10, mitochondrial [OS=Saccharomyces cerevisiae S288c]                      | 851611 | RSM10; YDR041 W  | cell organization and biogenesis;metabolic process                                                       | mitochondrion;ribosome                  | structural molecule activity                                      | 1.424  | 0.425 | 0.30 |
| Q03799 | 37S ribosomal protein S8, mitochondrial [OS=Saccharomyces cerevisiae S288c]                       | 855190 | MRPS8; YMR158 W  | cell organization and biogenesis;metabolic process                                                       | mitochondrion;ribosome                  | structural molecule activity                                      | 1.424  | 0.425 | 0.30 |
| P47039 | Probable kynurenine--oxoglutarate transaminase BNA3 [OS=Saccharomyces cerevisiae S288c]           | 853386 | BNA3; YJL060W    | metabolic process;regulation of biological process                                                       | cytoplasm;mitochondrion                 | catalytic activity                                                | 0.334  | 0.101 | 0.30 |
| P22354 | 54S ribosomal protein L20, mitochondrial [OS=Saccharomyces cerevisiae S288c]                      | 853960 | MRPL20; YKR085C  | cell organization and biogenesis;metabolic process                                                       | mitochondrion;ribosome                  | structural molecule activity                                      | 1.276  | 0.389 | 0.30 |
| P32266 | Dynamin-like GTPase MGM1, mitochondrial [OS=Saccharomyces cerevisiae S288c]                       | 854386 | MGM1; YOR211C    | cell organization and biogenesis                                                                         | membrane;mitochondrion                  | catalytic activity;nucleotide binding;protein binding             | 0.28   | 0.086 | 0.31 |
| P40051 | Intermediate cleaving peptidase 55 [OS=Saccharomyces cerevisiae S288c]                            | 856811 | ICP55; YER078C   | metabolic process;regulation of biological process                                                       | membrane;mitochondrion;nucleus          | catalytic activity;metal ion binding                              | 0.25   | 0.077 | 0.31 |
| P10849 | mitochondrial transcription factor 2 [OS=Saccharomyces cerevisiae S288c]                          | 851517 | MTF2; YDL044C    | metabolic process                                                                                        | mitochondrion;organelle lumen           | protein binding;RNA binding                                       | 0.259  | 0.08  | 0.31 |
| P07236 | Threonine--tRNA ligase, mitochondrial [OS=Saccharomyces cerevisiae S288c]                         | 853640 | MST1; YKL194C    | metabolic process                                                                                        | cytoplasm;mitochondrion;organelle lumen | catalytic activity;nucleotide binding;RNA binding                 | 0.233  | 0.072 | 0.31 |
| P47158 | Putative transferase CAF17, mitochondrial                                                         | 853586 | IBA57; YJR122W   | cell organization and biogenesis;metabolic                                                               | mitochondrion;organelle lumen           | catalytic activity                                                | 0.241  | 0.075 | 0.31 |

|        |                                                                                                      |        |                    |                                                                                                          |                                         |                                                                                |        |        |      |
|--------|------------------------------------------------------------------------------------------------------|--------|--------------------|----------------------------------------------------------------------------------------------------------|-----------------------------------------|--------------------------------------------------------------------------------|--------|--------|------|
|        | [OS=Saccharomyces cerevisiae S288c]                                                                  |        |                    | process                                                                                                  |                                         |                                                                                |        |        |      |
| P10507 | mitochondrial-processing peptidase subunit beta [OS=Saccharomyces cerevisiae S288c]                  | 850860 | MAS1; YLR163C      | metabolic process;transport                                                                              | mitochondrion;organelle lumen           | catalytic activity;metal ion binding;protein binding                           | 2.481  | 0.778  | 0.31 |
| P32860 | NifU-like protein, mitochondrial [OS=Saccharomyces cerevisiae S288c]                                 | 853826 | NFU1; YKL040C      | cell organization and biogenesis;cellular homeostasis;metabolic process                                  | mitochondrion;organelle lumen           | metal ion binding                                                              | 5.494  | 1.738  | 0.32 |
| P35999 | Mitochondrial intermediate peptidase [OS=Saccharomyces cerevisiae S288c]                             | 853724 | OCT1; YKL134C      | cellular homeostasis;metabolic process;regulation of biological process                                  | mitochondrion;organelle lumen           | catalytic activity;metal ion binding                                           | 0.145  | 0.046  | 0.32 |
| P25039 | Elongation factor G, mitochondrial [OS=Saccharomyces cerevisiae S288c]                               | 850758 | MEF1; YLR069C      | cell organization and biogenesis;metabolic process                                                       | cytosol;mitochondrion                   | catalytic activity;nucleotide binding;RNA binding                              | 1.024  | 0.326  | 0.32 |
| Q07500 | External NADH-ubiquinone oxidoreductase 2, mitochondrial [OS=Saccharomyces cerevisiae S288c]         | 851474 | NDE2; YDL085 W     | metabolic process                                                                                        | mitochondrion                           | catalytic activity;nucleotide binding                                          | 12.594 | 4.012  | 0.32 |
| P11914 | Mitochondrial-processing peptidase subunit alpha [OS=Saccharomyces cerevisiae S288c]                 | 856419 | MAS2; YHR024C      | metabolic process;transport                                                                              | membrane;mitochondrion;organelle lumen  | catalytic activity;metal ion binding;protein binding                           | 2.311  | 0.738  | 0.32 |
| P00431 | cytochrome c peroxidase, mitochondrial [OS=Saccharomyces cerevisiae S288c]                           | 853940 | CCP1; YKR066C      | metabolic process;response to stimulus                                                                   | mitochondrion;organelle lumen           | antioxidant activity;catalytic activity;metal ion binding;protein binding      | 2.162  | 0.701  | 0.32 |
| P04803 | Tryptophan--tRNA ligase, mitochondrial [OS=Saccharomyces cerevisiae S288c]                           | 851861 | MSW1; YDR268 W     | metabolic process                                                                                        | cytoplasm;mitochondrion;organelle lumen | catalytic activity;nucleotide binding                                          | 0.896  | 0.292  | 0.33 |
| P37267 | Assembly factor cbp4 [OS=Saccharomyces cerevisiae S288c]                                             |        | CBP4               | cell organization and biogenesis                                                                         | membrane;mitochondrion                  |                                                                                | 5.579  | 1.848  | 0.33 |
| P14908 | Mitochondrial transcription factor 1 [OS=Saccharomyces cerevisiae S288c]                             | 855268 | MTF1; YMR228 W     | metabolic process;regulation of biological process                                                       | mitochondrion;organelle lumen           | catalytic activity;DNA binding;RNA binding                                     | 0.778  | 0.259  | 0.33 |
| P53736 | Uncharacterized protein YNR040W [OS=Saccharomyces cerevisiae S288c]                                  | 855776 | YNR040 W; YNR040 W |                                                                                                          | mitochondrion                           |                                                                                | 1.154  | 0.389  | 0.34 |
| Q08970 | Mitochondrial metal transporter 2 [OS=Saccharomyces cerevisiae S288c]                                | 855877 | MMT2; YPL224C      | cellular homeostasis;regulation of biological process;response to stimulus;transport                     | membrane;mitochondrion                  | transporter activity                                                           | 0.532  | 0.186  | 0.35 |
| P06168 | ketol-acid reductoisomerase, mitochondrial [OS=Saccharomyces cerevisiae S288c]                       | 851069 | ILV5; YLR355C      | cell organization and biogenesis;metabolic process                                                       | mitochondrion                           | catalytic activity;DNA binding;metal ion binding                               | 28.126 | 9.857  | 0.35 |
| P35191 | DnaJ homolog 1, mitochondrial [OS=Saccharomyces cerevisiae S288c]                                    | 850530 | MDJ1; YFL016C      | cell organization and biogenesis;metabolic process;regulation of biological process;response to stimulus | mitochondrion;organelle lumen           | enzyme regulator activity;metal ion binding;nucleotide binding;protein binding | 4.722  | 1.656  | 0.35 |
| P36046 | Mitochondrial intermembrane space import and assembly protein 40 [OS=Saccharomyces cerevisiae S288c] | 853639 | MIA40; YKL195 W    | cellular component movement;metabolic process;response to stimulus;transport                             | membrane;mitochondrion                  | catalytic activity;protein binding;transporter activity                        | 2.3    | 0.817  | 0.36 |
| Q06485 | Autophagy-related protein 33 [OS=Saccharomyces cerevisiae S288c]                                     | 851070 | ATG33; YLR356 W    | cell communication;metabolic process;response to stimulus                                                | membrane;mitochondrion                  |                                                                                | 2.162  | 0.778  | 0.36 |
| P39522 | Dihydroxy-acid dehydratase, mitochondrial [OS=Saccharomyces cerevisiae S288c]                        | 853473 | ILV3; YJR016C      | metabolic process                                                                                        | mitochondrion                           | catalytic activity;metal ion binding                                           | 39.37  | 14.199 | 0.36 |
| Q12428 | Probable 2-methylcitrate dehydratase [OS=Saccharomyces cerevisiae S288c]                             | 856108 | PDH1; YPR002 W     | metabolic process                                                                                        | cytoplasm;membrane;mitochondrion        | catalytic activity                                                             | 19.535 | 7.058  | 0.36 |
| P18900 | hexaprenyl pyrophosphate synthase, mitochondrial [OS=Saccharomyces cerevisiae S288c]                 | 852288 | COQ1; YBR003 W     | metabolic process                                                                                        | membrane;mitochondrion                  | catalytic activity;metal ion binding;protein binding                           | 0.711  | 0.259  | 0.36 |
| Q08223 | Altered inheritance of mitochondria protein 39, mitochondrial [OS=Saccharomyces cerevisiae S288c]    | 854103 | AIM39; YOL053 W    |                                                                                                          | cytosol;membrane;mitochondrion          |                                                                                | 0.711  | 0.259  | 0.36 |
| Q08968 | UPF0061 protein FMP40 [OS=Saccharomyces cerevisiae S288c]                                            | 855879 | FMP40; YPL222 W    |                                                                                                          | mitochondrion                           | protein binding                                                                | 2.495  | 0.917  | 0.37 |
| P32332 | Mitochondrial oxaloacetate transport protein [OS=Saccharomyces cerevisiae S288c]                     | 853739 | OAC1; YKL120 W     | metabolic process;transport                                                                              | membrane;mitochondrion                  | structural molecule activity;transporter activity                              | 5.813  | 2.162  | 0.37 |

|        |                                                                                                            |        |                        |                                                                                                        |                                         |                                                                                |        |       |      |
|--------|------------------------------------------------------------------------------------------------------------|--------|------------------------|--------------------------------------------------------------------------------------------------------|-----------------------------------------|--------------------------------------------------------------------------------|--------|-------|------|
|        | S288c]                                                                                                     |        |                        |                                                                                                        |                                         | r activity                                                                     |        |       |      |
| P46681 | D-lactate dehydrogenase [cytochrome] 2, mitochondrial [OS=Saccharomyces cerevisiae S288c]                  | 851376 | DLD2; YDL178 W         | metabolic process                                                                                      | mitochondrion;organelle lumen           | catalytic activity;nucleotide binding;protein binding                          | 1.829  | 0.682 | 0.37 |
| P23833 | Protein SCO1, mitochondrial [OS=Saccharomyces cerevisiae S288c]                                            | 852325 | SCO1; YBR037C          | cell organization and biogenesis;cellular homeostasis;response to stimulus;transport                   | membrane;mitochondrion                  | antioxidant activity;catalytic activity;metal ion binding                      | 1.783  | 0.668 | 0.37 |
| P00927 | Threonine dehydratase, mitochondrial [OS=Saccharomyces cerevisiae S288c]                                   | 856819 | ILV1; YER086 W         | metabolic process                                                                                      | cytoplasm;mitochondrion                 | catalytic activity                                                             | 3.375  | 1.285 | 0.38 |
| P16451 | Pyruvate dehydrogenase complex protein X component, mitochondrial [OS=Saccharomyces cerevisiae S288c]      | 853107 | PDX1; YGR193C          | metabolic process                                                                                      | mitochondrion;organelle lumen           | catalytic activity;structural molecule activity                                | 4.055  | 1.555 | 0.38 |
| P23180 | Probable oxidoreductase AIM17 [OS=Saccharomyces cerevisiae S288c]                                          | 856365 | AIM17; YHL021C         | cell organization and biogenesis;metabolic process                                                     | mitochondrion                           | catalytic activity;metal ion binding                                           | 9      | 3.467 | 0.39 |
| P12686 | 37S ribosomal protein MRP13, mitochondrial [OS=Saccharomyces cerevisiae S288c]                             | 852975 | MRP13; YGR084C         | cell organization and biogenesis;metabolic process                                                     | mitochondrion;ribosome                  | structural molecule activity                                                   | 1.512  | 0.585 | 0.39 |
| P32453 | Protein ATP11, mitochondrial [OS=Saccharomyces cerevisiae S288c]                                           | 855401 | ATP11; YNL315C         | cell organization and biogenesis                                                                       | mitochondrion                           | protein binding                                                                | 1.512  | 0.585 | 0.39 |
| P02992 | elongation factor Tu, mitochondrial [OS=Saccharomyces cerevisiae S288c]                                    | 854359 | TUF1; YOR187 W         | cell organization and biogenesis;metabolic process                                                     | mitochondrion                           | catalytic activity;nucleotide binding;RNA binding                              | 23.245 | 9     | 0.39 |
| Q02204 | 54S ribosomal protein L13, mitochondrial [OS=Saccharomyces cerevisiae S288c]                               | 853875 | MRP13; YKR006C         | cell organization and biogenesis;metabolic process                                                     | mitochondrion;ribosome                  | structural molecule activity                                                   | 1.371  | 0.54  | 0.39 |
| P17695 | Glutaredoxin-2, mitochondrial [OS=Saccharomyces cerevisiae S288c]                                          | 852124 | GRX2; YDR513 W         | cellular homeostasis;metabolic process;regulation of biological process;response to stimulus;transport | cytoplasm;cytosol;mitochondrion;nucleus | antioxidant activity;catalytic activity                                        | 1.31   | 0.52  | 0.40 |
| P36527 | 54S ribosomal protein L28, mitochondrial [OS=Saccharomyces cerevisiae S288c]                               | 852073 | MRPL28; YDR462 W       | cell organization and biogenesis;metabolic process                                                     | mitochondrion;ribosome                  | structural molecule activity                                                   | 1.31   | 0.52  | 0.40 |
| P23369 | 54S ribosomal protein L25, mitochondrial [OS=Saccharomyces cerevisiae S288c]                               | 852967 | MRPL25; YGR076C        | cell organization and biogenesis;metabolic process                                                     | mitochondrion;ribosome                  | structural molecule activity                                                   | 1.31   | 0.52  | 0.40 |
| P38120 | 37S ribosomal protein S9, mitochondrial [OS=Saccharomyces cerevisiae S288c]                                | 852443 | MRP59; YBR146 W        | cell organization and biogenesis;metabolic process                                                     | mitochondrion;ribosome                  | RNA binding;structural molecule activity                                       | 1.254  | 0.501 | 0.40 |
| P32387 | 54S ribosomal protein L41, mitochondrial [OS=Saccharomyces cerevisiae S288c]                               | 852014 | MRP20; YDR405 W        | cell organization and biogenesis;metabolic process                                                     | mitochondrion;ribosome                  | nucleotide binding;protein binding;RNA binding;structural molecule activity    | 1.254  | 0.501 | 0.40 |
| Q96VH5 | MICOS complex subunit Mic10 [OS=Saccharomyces cerevisiae S288c]                                            | 850300 | MOS1; MIC10; YCL057C-A | cell organization and biogenesis                                                                       | membrane;mitochondrion                  |                                                                                | 4.179  | 1.683 | 0.40 |
| Q01163 | 37S ribosomal protein S23, mitochondrial [OS=Saccharomyces cerevisiae S288c]                               | 852748 | RSM23; YGL129C         | cell organization and biogenesis;metabolic process                                                     | mitochondrion;ribosome                  | catalytic activity;nucleotide binding;RNA binding;structural molecule activity | 2.695  | 1.11  | 0.41 |
| P33759 | 37S ribosomal protein S5, mitochondrial [OS=Saccharomyces cerevisiae S288c]                                | 852553 | MRP55; YBR251 W        | cell organization and biogenesis;metabolic process                                                     | mitochondrion;ribosome                  | RNA binding;structural molecule activity                                       | 0.995  | 0.413 | 0.42 |
| Q12031 | Mitochondrial 2-methylisocitrate lyase [OS=Saccharomyces cerevisiae S288c]                                 | 856114 | ICL2; YPR006C          | metabolic process                                                                                      | mitochondrion;organelle lumen           | catalytic activity                                                             | 7.859  | 3.281 | 0.42 |
| P40530 | [Pyruvate dehydrogenase (acetyl-transferring)] kinase 1, mitochondrial [OS=Saccharomyces cerevisiae S288c] | 854769 | PKP1; YIL042C          | metabolic process                                                                                      | mitochondrion;organelle lumen           | catalytic activity;nucleotide binding;protein binding                          | 0.931  | 0.389 | 0.42 |
| Q03246 | 37S ribosomal protein S17, mitochondrial [OS=Saccharomyces cerevisiae S288c]                               | 855226 | MRP517; YMR188 C       | cell differentiation;cell organization and biogenesis;metabolic process                                | mitochondrion;ribosome                  | RNA binding;structural molecule activity                                       | 0.931  | 0.389 | 0.42 |
| P36151 | Uncharacterized protein YKR070W [OS=Saccharomyces cerevisiae S288c]                                        | 853944 | YKR070 W; YKR070 W     | metabolic process                                                                                      | mitochondrion                           |                                                                                | 1.976  | 0.833 | 0.42 |
| P38797 | Protein phosphatase 2C homolog 7, mitochondrial                                                            | 856475 | PTC7; YHR076           | metabolic process                                                                                      | mitochondrion                           | catalytic activity;metal ion                                                   | 0.874  | 0.369 | 0.42 |



|        |                                                                                                          |        |                      |                                                                                                                               |                                         |                                                                            |        |        |      |
|--------|----------------------------------------------------------------------------------------------------------|--------|----------------------|-------------------------------------------------------------------------------------------------------------------------------|-----------------------------------------|----------------------------------------------------------------------------|--------|--------|------|
|        | [OS=Saccharomyces cerevisiae S288c]                                                                      |        | W                    |                                                                                                                               |                                         | binding;protein binding                                                    |        |        |      |
| P00830 | ATP synthase subunit beta, mitochondrial [OS=Saccharomyces cerevisiae S288c]                             | 853585 | ATP2; YJR121W        | metabolic process;transport                                                                                                   | cytosol;membrane;mitochondrion          | catalytic activity;nucleotide binding;protein binding;transporter activity | 99     | 41.987 | 0.42 |
| P40086 | Cytochrome c oxidase assembly protein cox15 [OS=Saccharomyces cerevisiae S288c]                          | 856884 | COX15; YER141W       | cell organization and biogenesis;metabolic process;transport                                                                  | membrane;mitochondrion                  | catalytic activity;transporter activity                                    | 1.555  | 0.668  | 0.43 |
| P15179 | Aspartate-tRNA ligase, mitochondrial [OS=Saccharomyces cerevisiae S288c]                                 | 856000 | MSD1; YPL104W        | metabolic process                                                                                                             | cytoplasm;mitochondrion;organelle lumen | catalytic activity;nucleotide binding                                      | 0.708  | 0.307  | 0.43 |
| Q12480 | Probable electron transfer flavoprotein subunit alpha, mitochondrial [OS=Saccharomyces cerevisiae S288c] | 856112 | AIM45; YPR004C       | metabolic process;transport                                                                                                   | mitochondrion;organelle lumen           | catalytic activity;nucleotide binding                                      | 3.467  | 1.512  | 0.44 |
| Q08818 | Meiotic sister-chromatid recombination protein 6, mitochondrial [OS=Saccharomyces cerevisiae S288c]      | 854536 | MSC6; YOR354C        | metabolic process                                                                                                             | mitochondrion;organelle lumen           | RNA binding                                                                | 1.154  | 0.506  | 0.44 |
| P48569 | Uncharacterized protein YDL183C [OS=Saccharomyces cerevisiae S288c]                                      | 851345 | YDL183C ; YDL183C    | transport                                                                                                                     |                                         |                                                                            | 0.624  | 0.274  | 0.44 |
| P36775 | Lon protease homolog, mitochondrial [OS=Saccharomyces cerevisiae S288c]                                  | 852259 | PIM1; YBL022C        | cell organization and biogenesis;metabolic process;regulation of biological process;response to stimulus                      | cytoplasm;mitochondrion;organelle lumen | catalytic activity;DNA binding;nucleotide binding;RNA binding              | 1.222  | 0.537  | 0.44 |
| P36520 | 54S ribosomal protein L10, mitochondrial [OS=Saccharomyces cerevisiae S288c]                             | 855436 | MRP10; YNL284C       | cell organization and biogenesis;metabolic process                                                                            | mitochondrion;ribosome                  | structural molecule activity                                               | 0.551  | 0.245  | 0.44 |
| P36163 | mitochondrial metalloendopeptidase OMA1 [OS=Saccharomyces cerevisiae S288c]                              | 853962 | OMA1; YKR087C        | metabolic process                                                                                                             | membrane;mitochondrion                  | catalytic activity;metal ion binding                                       | 0.551  | 0.245  | 0.44 |
| Q02784 | Monothiol glutaredoxin-5, mitochondrial [OS=Saccharomyces cerevisiae S288c]                              | 856048 | GRX5; YPL059W        | cell organization and biogenesis;cellular homeostasis;metabolic process;regulation of biological process;response to stimulus | mitochondrion;organelle lumen           | catalytic activity;metal ion binding                                       | 2.594  | 1.154  | 0.44 |
| P38341 | MICOS complex subunit MIC12 [OS=Saccharomyces cerevisiae S288c]                                          | 852566 | AIM5; MIC12; YBR262C | cell organization and biogenesis                                                                                              | membrane;mitochondrion                  |                                                                            | 2.594  | 1.154  | 0.44 |
| P42949 | Mitochondrial import inner membrane translocase subunit TIM16 [OS=Saccharomyces cerevisiae S288c]        | 853340 | PAM16; YJL104W       | transport                                                                                                                     | membrane;mitochondrion                  | protein binding                                                            | 0.52   | 0.233  | 0.45 |
| P40053 | Altered inheritance of mitochondria protein 9, mitochondrial [OS=Saccharomyces cerevisiae S288c]         | 856813 | AIM9; YER080W        |                                                                                                                               | mitochondrion                           |                                                                            | 4.289  | 1.938  | 0.45 |
| P38088 | Glycine-tRNA ligase 1, mitochondrial [OS=Saccharomyces cerevisiae S288c]                                 |        | GRS1                 | metabolic process                                                                                                             | cytoplasm;mitochondrion;organelle lumen | catalytic activity;nucleotide binding;protein binding                      | 0.468  | 0.212  | 0.45 |
| P08067 | cytochrome b-c1 complex subunit Rieske, mitochondrial [OS=Saccharomyces cerevisiae S288c]                | 856689 | RIP1; YEL024W        | metabolic process;transport                                                                                                   | membrane;mitochondrion                  | catalytic activity;metal ion binding;transporter activity                  | 55.234 | 25.102 | 0.45 |
| P32839 | Mitochondrial chaperone BCS1 [OS=Saccharomyces cerevisiae S288c]                                         | 851981 | BCS1; YDR375C        | cell organization and biogenesis;metabolic process;response to stimulus;transport                                             | cytosol;membrane;mitochondrion          | catalytic activity;nucleotide binding;transporter activity                 | 0.425  | 0.194  | 0.46 |
| Q01976 | ADP-ribose pyrophosphatase [OS=Saccharomyces cerevisiae S288c]                                           | 852408 | YSA1; YBR111C        | metabolic process                                                                                                             | cytoplasm;mitochondrion;nucleus         | catalytic activity;metal ion binding                                       | 0.425  | 0.194  | 0.46 |
| P38175 | 37S ribosomal protein MRP21, mitochondrial [OS=Saccharomyces cerevisiae S288c]                           | 852188 | MRP21; YBL090W       | cell organization and biogenesis;metabolic process                                                                            | mitochondrion;ribosome                  | structural molecule activity                                               | 0.425  | 0.194  | 0.46 |
| Q12166 | 2-isopropylmalate synthase 2, mitochondrial [OS=Saccharomyces cerevisiae S288c]                          | 854275 | LEU9; YOR108W        | metabolic process                                                                                                             | mitochondrion                           | catalytic activity;protein binding                                         | 3.739  | 1.707  | 0.46 |
| P37292 | Serine hydroxymethyltransferase, mitochondrial [OS=Saccharomyces cerevisiae S288c]                       | 852565 | SHM1; YBR263W        | metabolic process                                                                                                             | mitochondrion                           | catalytic activity                                                         | 12.219 | 5.579  | 0.46 |
| Q03713 | Respiratory supercomplex factor 1, mitochondrial [OS=Saccharomyces cerevisiae S288c]                     | 854978 | RCF1; YML030W        | cell organization and biogenesis                                                                                              | membrane;mitochondrion                  |                                                                            | 2.162  | 0.995  | 0.46 |

|        |                                                                                                                |        |                    |                                                                                                                               |                                                 |                                                                              |        |       |      |
|--------|----------------------------------------------------------------------------------------------------------------|--------|--------------------|-------------------------------------------------------------------------------------------------------------------------------|-------------------------------------------------|------------------------------------------------------------------------------|--------|-------|------|
| Q02950 | 37S ribosomal protein MRP51, mitochondrial [OS=Saccharomyces cerevisiae S288c]                                 | 855985 | MRP51; YPL118 W    | cell organization and biogenesis;metabolic process                                                                            | mitochondrion;ribosome                          | structural molecule activity                                                 | 1.154  | 0.532 | 0.46 |
| P40508 | Uncharacterized protein YIL077C [OS=Saccharomyces cerevisiae S288c]                                            | 854733 | YIL077C; YIL077C   |                                                                                                                               | mitochondrion                                   |                                                                              | 1.448  | 0.668 | 0.46 |
| P17558 | 37S ribosomal protein PET123, mitochondrial [OS=Saccharomyces cerevisiae S288c]                                | 854329 | PET123; YOR158 W   | cell organization and biogenesis;metabolic process                                                                            | mitochondrion;ribosome                          | structural molecule activity                                                 | 1.448  | 0.668 | 0.46 |
| Q05779 | Ubiquinone biosynthesis protein COQ9, mitochondrial [OS=Saccharomyces cerevisiae S288c]                        | 850898 | COQ9; YLR201C      | metabolic process                                                                                                             | membrane;mitochondrion                          |                                                                              | 0.359  | 0.166 | 0.46 |
| P36523 | 54S ribosomal protein L15, mitochondrial [OS=Saccharomyces cerevisiae S288c]                                   | 851022 | MRPL15; YLR312 W-A | cell organization and biogenesis;metabolic process                                                                            | mitochondrion;ribosome                          | catalytic activity;RNA binding;structural molecule activity                  | 0.334  | 0.155 | 0.46 |
| P32378 | 4-hydroxybenzoate polyprenyltransferase, mitochondrial [OS=Saccharomyces cerevisiae S288c]                     | 855778 | COQ2; YNR041C      | metabolic process;transport                                                                                                   | membrane;mitochondrion                          | catalytic activity                                                           | 0.292  | 0.136 | 0.47 |
| P38884 | Altered inheritance of mitochondria protein 18, mitochondrial [OS=Saccharomyces cerevisiae S288c]              | 856605 | AIM18; YHR198C     |                                                                                                                               | mitochondrion                                   | catalytic activity                                                           | 0.311  | 0.145 | 0.47 |
| Q06493 | LETM1 domain-containing protein YLH47, mitochondrial [OS=Saccharomyces cerevisiae S288c]                       | 856243 | YLH47; YPR125 W    | cell organization and biogenesis;transport                                                                                    | membrane;mitochondrion                          |                                                                              | 1.043  | 0.487 | 0.47 |
| P38127 | mitochondrial carrier protein RIM2 [OS=Saccharomyces cerevisiae S288c]                                         | 852491 | RIM2; YBR192 W     | cell organization and biogenesis;metabolic process;transport                                                                  | membrane;mitochondrion                          | structural molecule activity;transporter activity                            | 1.239  | 0.585 | 0.47 |
| P00445 | Superoxide dismutase [Cu-Zn] [OS=Saccharomyces cerevisiae S288c]                                               | 853568 | SOD1; YJR104C      | cell organization and biogenesis;cellular homeostasis;metabolic process;regulation of biological process;response to stimulus | cytoplasm;cytosol;mitochondrion;nucleus         | antioxidant activity;catalytic activity;metal ion binding;protein binding    | 1.848  | 0.874 | 0.47 |
| Q08686 | Thiosulfate sulfurtransferase TUM1 [OS=Saccharomyces cerevisiae S288c]                                         | 854425 | TUM1; YOR251C      | metabolic process                                                                                                             | cytoplasm;mitochondrion                         | catalytic activity;protein binding                                           | 0.212  | 0.101 | 0.48 |
| P43635 | Citrate synthase 3, mitochondrial [OS=Saccharomyces cerevisiae S288c]                                          | 856107 | CIT3; YPR001 W     | metabolic process                                                                                                             | mitochondrion                                   | catalytic activity                                                           | 6.11   | 2.914 | 0.48 |
| P21375 | Fumarate reductase 2 [OS=Saccharomyces cerevisiae S288c]                                                       | 853510 | OSM1; YJR051W      | metabolic process                                                                                                             | endoplasmic reticulum;mitochondrion             | catalytic activity;nucleotide binding                                        | 0.16   | 0.077 | 0.48 |
| P38860 | GTPase MTG2, mitochondrial [OS=Saccharomyces cerevisiae S288c]                                                 | 856573 | MTG2; YHR168 W     | metabolic process;transport                                                                                                   | membrane;mitochondrion                          | catalytic activity;metal ion binding;nucleotide binding;transporter activity | 0.145  | 0.07  | 0.48 |
| P53166 | ATP-dependent RNA helicase mrh4, mitochondrial [OS=Saccharomyces cerevisiae S288c]                             | 852816 | MRH4; YGL064C      | cell organization and biogenesis;metabolic process                                                                            | mitochondrion;organelle lumen                   | catalytic activity;nucleotide binding;RNA binding                            | 0.145  | 0.07  | 0.48 |
| P42900 | Sigma-like sequence protein 1, mitochondrial [OS=Saccharomyces cerevisiae S288c]                               | 850830 | SLS1; YLR139C      | cell organization and biogenesis;metabolic process                                                                            | membrane;mitochondrion                          | protein binding                                                              | 0.125  | 0.061 | 0.49 |
| P48526 | Isoleucine--tRNA ligase, mitochondrial [OS=Saccharomyces cerevisiae S288c]                                     | 856067 | ISM1; YPL040C      | cell organization and biogenesis;metabolic process;regulation of biological process                                           | cytoplasm;cytosol;mitochondrion;organelle lumen | catalytic activity;nucleotide binding                                        | 0.081  | 0.04  | 0.49 |
| P48237 | Mitochondrial group I intron splicing factor CCM1 [OS=Saccharomyces cerevisiae S288c]                          | 853053 | CCM1; YGR150C      | cell organization and biogenesis;metabolic process                                                                            | mitochondrion                                   | RNA binding                                                                  | 0.089  | 0.044 | 0.49 |
| Q06236 | Mitochondrial inner membrane protein SHH4 [OS=Saccharomyces cerevisiae S288c]                                  | 850861 | SHH4; YLR164 W     | metabolic process                                                                                                             | membrane;mitochondrion                          | catalytic activity;metal ion binding                                         | 6.499  | 3.217 | 0.49 |
| P08417 | fumarate hydratase, mitochondrial [OS=Saccharomyces cerevisiae S288c]                                          | 855866 | FUM1; YPL262 W     | cell organization and biogenesis;metabolic process                                                                            | cytoplasm;cytosol;mitochondrion;organelle lumen | catalytic activity                                                           | 13.874 | 6.88  | 0.50 |
| P09440 | C-1-tetrahydrofolate synthase, mitochondrial [OS=Saccharomyces cerevisiae S288c]                               | 852378 | MIS1; YBR084 W     | metabolic process                                                                                                             | cytosol;mitochondrion                           | catalytic activity;nucleotide binding                                        | 1.668  | 0.829 | 0.50 |
| P47052 | succinate dehydrogenase [ubiquinone] flavoprotein subunit 2, mitochondrial [OS=Saccharomyces cerevisiae S288c] | 853405 | YJL045W ; YJL045W  | metabolic process;transport                                                                                                   | membrane;mitochondrion                          | catalytic activity;nucleotide binding                                        | 5.884  | 2.932 | 0.50 |

|        |                                                                                                                    |        |                          |                                                                                   |                                 |                                                                                        |        |        |      |
|--------|--------------------------------------------------------------------------------------------------------------------|--------|--------------------------|-----------------------------------------------------------------------------------|---------------------------------|----------------------------------------------------------------------------------------|--------|--------|------|
| P28817 | 3-hydroxyisobutyryl-CoA hydrolase, mitochondrial [OS=Saccharomyces cerevisiae S288c]                               | 851606 | EHD3; YDR036C            | metabolic process                                                                 | mitochondrion                   | catalytic activity                                                                     | 1.212  | 0.61   | 0.50 |
| P42940 | Probable electron transfer flavoprotein subunit beta [OS=Saccharomyces cerevisiae S288c]                           | 853121 | CIR1; YGR207C            | metabolic process;transport                                                       | mitochondrion;organelle lumen   |                                                                                        | 7.66   | 3.87   | 0.51 |
| P10662 | 37S ribosomal protein MRP1, mitochondrial [OS=Saccharomyces cerevisiae S288c]                                      | 851948 | MRP1; YDR347 W           | cell organization and biogenesis;metabolic process;response to stimulus           | mitochondrion;ribosome          | antioxidant activity;catalytic activity;metal ion binding;structural molecule activity | 2.981  | 1.512  | 0.51 |
| P48015 | Aminomethyltransferase, mitochondrial [OS=Saccharomyces cerevisiae S288c]                                          | 851582 | GCV1; YDR019C            | metabolic process                                                                 | mitochondrion                   | catalytic activity;protein binding                                                     | 11.217 | 5.7    | 0.51 |
| P36066 | Protein MRG3-like [OS=Saccharomyces cerevisiae S288c]                                                              | 853725 | YKL133C; YKL133C         | metabolic process                                                                 | membrane;mitochondrion          | protein binding                                                                        | 0.655  | 0.334  | 0.51 |
| P49095 | Glycine dehydrogenase (Decarboxylating), mitochondrial [OS=Saccharomyces cerevisiae S288c]                         | 855227 | GCV2; YMR189 W           | metabolic process                                                                 | cytosol;mitochondrion           | catalytic activity                                                                     | 2.884  | 1.471  | 0.51 |
| P38172 | MIOREX complex component 3 [OS=Saccharomyces cerevisiae S288c]                                                     | 852181 | YBL095 W; MRX3; YBL095 W |                                                                                   | membrane;mitochondrion          |                                                                                        | 0.968  | 0.501  | 0.52 |
| P25374 | Cysteine desulfurase, mitochondrial [OS=Saccharomyces cerevisiae S288c]                                            | 850343 | NFS1; YCL017C            | cell organization and biogenesis;cellular homeostasis;metabolic process           | mitochondrion;nucleus           | catalytic activity;metal ion binding;protein binding                                   | 2.594  | 1.346  | 0.52 |
| P37298 | Succinate dehydrogenase [ubiquinone] cytochrome b small subunit, mitochondrial [OS=Saccharomyces cerevisiae S288c] | 851758 | SDH4; YDR178 W           | metabolic process;transport                                                       | membrane;mitochondrion          | catalytic activity;metal ion binding                                                   | 4.995  | 2.594  | 0.52 |
| P38072 | Protein SCO2, mitochondrial [OS=Saccharomyces cerevisiae S288c]                                                    | 852312 | SCO2; YBR024 W           | cell organization and biogenesis;cellular homeostasis;metabolic process;transport | membrane;mitochondrion          | antioxidant activity;catalytic activity;metal ion binding                              | 1.404  | 0.73   | 0.52 |
| P04037 | cytochrome c oxidase subunit 4, mitochondrial [OS=Saccharomyces cerevisiae S288c]                                  | 852688 | COX4; YGL187C            | cell organization and biogenesis;metabolic process;transport                      | membrane;mitochondrion          | catalytic activity;metal ion binding;transporter activity                              | 34.112 | 17.738 | 0.52 |
| P07806 | Valine-tRNA ligase, mitochondrial [OS=Saccharomyces cerevisiae S288c]                                              | 852986 | VAS1; YGR094 W           | metabolic process;regulation of biological process                                | cytoplasm;cytosol;mitochondrion | catalytic activity;nucleotide binding                                                  | 0.722  | 0.377  | 0.52 |
| P07256 | Cytochrome b-c1 complex subunit 1, mitochondrial [OS=Saccharomyces cerevisiae S288c]                               | 852235 | COR1; YBL045C            | metabolic process;transport                                                       | membrane;mitochondrion          | catalytic activity;metal ion binding;protein binding;transporter activity              | 18.783 | 9.89   | 0.53 |
| P53140 | Protein RMD9, mitochondrial [OS=Saccharomyces cerevisiae S288c]                                                    | 852771 | RMD9; YGL107C            | cell differentiation;metabolic process;regulation of biological process           | membrane;mitochondrion          | RNA binding                                                                            | 1.268  | 0.668  | 0.53 |
| P53312 | Succinyl-CoA ligase [ADP-forming] subunit beta, mitochondrial [OS=Saccharomyces cerevisiae S288c]                  | 853159 | LSC2; YGR244C            | metabolic process                                                                 | mitochondrion                   | catalytic activity;nucleotide binding                                                  | 20.017 | 10.602 | 0.53 |
| P43617 | Uncharacterized mitochondrial carrier YFR045W [OS=Saccharomyces cerevisiae S288c]                                  | 850606 | YFR045 W; YFR045 W       | metabolic process;transport                                                       | membrane;mitochondrion          | structural molecule activity;transporter activity                                      | 0.778  | 0.413  | 0.53 |
| P01097 | ATPase inhibitor, mitochondrial [OS=Saccharomyces cerevisiae S288c]                                                | 851347 | INH1; YDL181 W           | metabolic process;regulation of biological process                                | mitochondrion                   | catalytic activity;enzyme regulator activity;protein binding                           | 2.162  | 1.154  | 0.53 |
| P32902 | 37S ribosomal protein MRP4, mitochondrial [OS=Saccharomyces cerevisiae S288c]                                      | 856384 | MRP4; YHL004 W           | cell organization and biogenesis;metabolic process                                | mitochondrion;ribosome          | structural molecule activity                                                           | 1.154  | 0.616  | 0.53 |
| P16387 | Pyruvate dehydrogenase E1 component subunit alpha, mitochondrial [OS=Saccharomyces cerevisiae S288c]               | 856925 | PDA1; YER178 W           | cell growth;metabolic process                                                     | mitochondrion;organelle lumen   | catalytic activity                                                                     | 25.264 | 13.497 | 0.53 |
| Q05892 | MIOREX complex component 2 [OS=Saccharomyces cerevisiae S288c]                                                     | 850997 | YLR290C; COQ11; YLR290C  | metabolic process                                                                 | mitochondrion                   | catalytic activity                                                                     | 3.217  | 1.738  | 0.54 |
| P36101 | tRNA threonylcarbamoyladenosine dehydratase 2 [OS=Saccharomyces cerevisiae S288c]                                  | 853841 | TCO2; YKL027 W; YKL027 W | metabolic process                                                                 | cytosol;membrane;mitochondrion  | catalytic activity;nucleotide binding                                                  | 0.616  | 0.334  | 0.54 |

|        |                                                                                                             |        |                    |                                                                                     |                                                  |                                                                         |        |        |      |
|--------|-------------------------------------------------------------------------------------------------------------|--------|--------------------|-------------------------------------------------------------------------------------|--------------------------------------------------|-------------------------------------------------------------------------|--------|--------|------|
| Q04935 | Cytochrome c oxidase protein 20, mitochondrial [OS=Saccharomyces cerevisiae S288c]                          | 851817 | COX20; YDR231C     | cell organization and biogenesis;metabolic process                                  | membrane;mitochondrion                           | protein binding                                                         | 1.894  | 1.031  | 0.54 |
| Q02608 | 37S ribosomal protein S16, mitochondrial [OS=Saccharomyces cerevisiae S288c]                                | 856094 | MRPS16; YPL013C    | cell organization and biogenesis;metabolic process                                  | mitochondrion;ribosome                           | structural molecule activity                                            | 1.683  | 0.931  | 0.55 |
| P39726 | Glycine cleavage system H protein, mitochondrial [OS=Saccharomyces cerevisiae S288c]                        | 851254 | GCV3; YAL044C      | metabolic process                                                                   | mitochondrion                                    | catalytic activity                                                      | 9      | 4.995  | 0.56 |
| P48360 | Probable NADPH:adrenodoxin oxidoreductase, mitochondrial [OS=Saccharomyces cerevisiae S288c]                | 851982 | ARH1; YDR376 W     | cellular homeostasis;metabolic process;transport                                    | cytoplasm;membrane;mitochondrion;organelle lumen | catalytic activity                                                      | 0.45   | 0.25   | 0.56 |
| P53326 | Uncharacterized protein YGR266W [OS=Saccharomyces cerevisiae S288c]                                         | 853182 | YGR266 W; YGR266 W |                                                                                     | membrane;mitochondrion                           |                                                                         | 1.081  | 0.602  | 0.56 |
| Q02776 | Mitochondrial import inner membrane translocase subunit TIM50 [OS=Saccharomyces cerevisiae S288c]           | 856042 | TIM50; YPL063 W    | cell organization and biogenesis;metabolic process;transport                        | membrane;mitochondrion                           | catalytic activity;protein binding;transporter activity                 | 7.483  | 4.179  | 0.56 |
| P36517 | 54S ribosomal protein L4, mitochondrial [OS=Saccharomyces cerevisiae S288c]                                 | 851160 | MRPL4; YLR439 W    | cell organization and biogenesis;metabolic process                                  | mitochondrion;ribosome                           | structural molecule activity                                            | 1.565  | 0.874  | 0.56 |
| P32795 | Mitochondrial inner membrane i-AAA protease supercomplex subunit YME1 [OS=Saccharomyces cerevisiae S288c]   | 856135 | YME1; YPR024 W     | metabolic process;response to stimulus;transport                                    | membrane;mitochondrion                           | catalytic activity;metal ion binding;nucleotide binding;protein binding | 1.938  | 1.085  | 0.56 |
| P40047 | Aldehyde dehydrogenase 5, mitochondrial [OS=Saccharomyces cerevisiae S288c]                                 | 856804 | ALD5; YER073 W     | metabolic process                                                                   | mitochondrion;organelle lumen                    | catalytic activity                                                      | 3.146  | 1.762  | 0.56 |
| P08525 | Cytochrome b-c1 complex subunit 8 [OS=Saccharomyces cerevisiae S288c]                                       | 853273 | QCR8; YJL166W      | metabolic process;transport                                                         | membrane;mitochondrion                           | catalytic activity;transporter activity                                 | 5.31   | 2.981  | 0.56 |
| P40012 | protoporphyrinogen oxidase [OS=Saccharomyces cerevisiae S288c]                                              | 856733 | HEM14; YER014 W    | metabolic process                                                                   | membrane;mitochondrion                           | catalytic activity                                                      | 1.482  | 0.833  | 0.56 |
| P32904 | 54S ribosomal protein L6, mitochondrial [OS=Saccharomyces cerevisiae S288c]                                 | 856552 | MRPL6; YHR147C     | cell organization and biogenesis;metabolic process                                  | mitochondrion;ribosome                           | RNA binding;structural molecule activity                                | 1.371  | 0.778  | 0.57 |
| P21801 | Succinate dehydrogenase [ubiquinone] iron-sulfur subunit, mitochondrial [OS=Saccharomyces cerevisiae S288c] | 850685 | SDH2; YLL041C      | metabolic process;transport                                                         | membrane;mitochondrion                           | catalytic activity;metal ion binding                                    | 32.839 | 18.684 | 0.57 |
| P40961 | prohibitin-1 [OS=Saccharomyces cerevisiae S288c]                                                            | 853033 | PHB1; YGR132C      | cell organization and biogenesis;metabolic process;regulation of biological process | membrane;mitochondrion                           | protein binding                                                         | 9      | 5.158  | 0.57 |
| P53889 | uncharacterized mitochondrial hydrolase FMP41 [OS=Saccharomyces cerevisiae S288c]                           | 855553 | FMP41; YNL168C     | metabolic process                                                                   | mitochondrion                                    | catalytic activity;metal ion binding                                    | 1.254  | 0.719  | 0.57 |
| P17505 | Malate dehydrogenase, mitochondrial [OS=Saccharomyces cerevisiae S288c]                                     | 853777 | MDH1; YKL085 W     | metabolic process                                                                   | mitochondrion;organelle lumen                    | catalytic activity;protein binding;RNA binding                          | 99     | 56.797 | 0.57 |
| P15424 | ATP-dependent RNA helicase MSS116, mitochondrial [OS=Saccharomyces cerevisiae S288c]                        | 851775 | MSS116; YDR194C    | metabolic process;regulation of biological process                                  | mitochondrion;organelle lumen                    | catalytic activity;nucleotide binding;RNA binding                       | 1.154  | 0.668  | 0.58 |
| P53732 | 37S ribosomal protein S12, mitochondrial [OS=Saccharomyces cerevisiae S288c]                                | 855772 | MRPS12; YNR036C    | cell organization and biogenesis;metabolic process                                  | mitochondrion;ribosome                           | structural molecule activity                                            | 1.154  | 0.668  | 0.58 |
| Q04599 | 54S ribosomal protein L1, mitochondrial [OS=Saccharomyces cerevisiae S288c]                                 | 851694 | MRPL1; YDR116C     | cell organization and biogenesis;metabolic process                                  | mitochondrion;ribosome                           | RNA binding;structural molecule activity                                | 1.069  | 0.624  | 0.58 |
| P38300 | Inner membrane mitoribosome receptor MBA1, mitochondrial [OS=Saccharomyces cerevisiae S288c]                | 852483 | MBA1; YBR185C      | cell organization and biogenesis;regulation of biological process                   | membrane;mitochondrion                           |                                                                         | 0.995  | 0.585  | 0.59 |
| P40185 | Protein mmf1, mitochondrial [OS=Saccharomyces cerevisiae S288c]                                             | 854760 | MMF1; YI051C       | cell organization and biogenesis;metabolic process                                  | mitochondrion;organelle lumen                    |                                                                         | 9      | 5.31   | 0.59 |
| P40452 | Cytochrome c oxidase assembly factor 1 [OS=Saccharomyces cerevisiae S288c]                                  | 854649 | COA1; YIL157C      | cell organization and biogenesis                                                    | membrane;mitochondrion                           | protein binding                                                         | 0.874  | 0.52   | 0.59 |
| P36525 | 54S ribosomal protein L24, mitochondrial [OS=Saccharomyces cerevisiae S288c]                                | 855231 | MRPL24; YMR193 W   | cell organization and biogenesis;metabolic process                                  | mitochondrion;ribosome                           | RNA binding;structural molecule activity                                | 1.929  | 1.154  | 0.60 |

|        |                                                                                                                          |             |                                 |                                                                                                           |                                                 |                                                                      |        |        |      |
|--------|--------------------------------------------------------------------------------------------------------------------------|-------------|---------------------------------|-----------------------------------------------------------------------------------------------------------|-------------------------------------------------|----------------------------------------------------------------------|--------|--------|------|
| P43616 | Cys-Gly metalloprotease<br>dug1 [OS=Saccharomyces<br>cerevisiae S288c]                                                   | 850605      | DUG1;<br>YFR044C                | metabolic process                                                                                         | cytoplasm;mitochondrion;ribosome                | catalytic<br>activity;metal ion<br>binding                           | 1.154  | 0.711  | 0.62 |
| Q12349 | ATP synthase subunit H,<br>mitochondrial<br>[OS=Saccharomyces cerevisiae<br>S288c]                                       | 851002      | ATP14;<br>YLR295C               | cell organization and<br>biogenesis;metabolic<br>process;transport                                        | membrane;mitochondrion                          | catalytic<br>activity;transporte<br>r activity                       | 2.728  | 1.683  | 0.62 |
| P38323 | ATP-dependent clpX-like<br>chaperone, mitochondrial<br>[OS=Saccharomyces cerevisiae<br>S288c]                            | 852528      | MCX1;<br>YBR227C                | metabolic process                                                                                         | membrane;mitochondrion;organelle lumen          | catalytic<br>activity;nucleotide<br>binding                          | 0.501  | 0.311  | 0.62 |
| Q06668 | Methyltransferase OMS1,<br>mitochondrial<br>[OS=Saccharomyces cerevisiae<br>S288c]                                       | 851911      | OMS1;<br>YDR316<br>W            | metabolic process                                                                                         | membrane;mitochondrion                          | catalytic activity                                                   | 0.484  | 0.301  | 0.62 |
| P40496 | 37S ribosomal protein S25,<br>mitochondrial<br>[OS=Saccharomyces cerevisiae<br>S288c]                                    | 854715      | RSM25;<br>YIL093C               | cell organization and<br>biogenesis;metabolic<br>process                                                  | mitochondrion;ribosome                          | structural<br>molecule activity                                      | 0.468  | 0.292  | 0.62 |
| Q3E824 | Uncharacterized protein<br>YOR020W-A<br>[OS=Saccharomyces cerevisiae<br>S288c]                                           | 146648<br>0 | YOR020<br>W-A;<br>YOR020<br>W-A | metabolic<br>process;transport                                                                            | membrane;mitochondrion                          |                                                                      | 5.813  | 3.642  | 0.63 |
| Q04689 | Altered inheritance of<br>mitochondria protein 32<br>[OS=Saccharomyces cerevisiae<br>S288c]                              | 854955      | AIM32;<br>YML050<br>W           |                                                                                                           |                                                 |                                                                      | 0.369  | 0.233  | 0.63 |
| P54857 | lipase 2 [OS=Saccharomyces<br>cerevisiae S288c]                                                                          | 851628      | TGL2;<br>YDR058C                | metabolic<br>process;transport                                                                            | mitochondrion                                   | catalytic activity                                                   | 0.369  | 0.233  | 0.63 |
| Q05648 | MIOREX complex component<br>10 [OS=Saccharomyces<br>cerevisiae S288c]                                                    | 851876      | YDR282C<br>; MRX10;<br>YDR282C  |                                                                                                           | membrane;mitochondrion                          |                                                                      | 0.35   | 0.222  | 0.63 |
| P38891 | Branched-chain-amino-acid<br>aminotransferase,<br>mitochondrial<br>[OS=Saccharomyces cerevisiae<br>S288c]                | 856615      | BAT1;<br>YHR208<br>W            | metabolic<br>process;regulation of<br>biological process;response<br>to stimulus                          | mitochondrion;organelle lumen                   | catalytic activity                                                   | 15.876 | 10.103 | 0.64 |
| P03879 | Intron-encoded RNA maturase<br>bi4 [OS=Saccharomyces<br>cerevisiae S288c]                                                | 854582      | BI4;<br>Q0120                   | metabolic process                                                                                         | membrane;mitochondrion                          | catalytic<br>activity;RNA<br>binding                                 | 0.28   | 0.179  | 0.64 |
| Q03028 | Mitochondrial 2-<br>oxodicarboxylate carrier 1<br>[OS=Saccharomyces cerevisiae<br>S288c]                                 | 855969      | ODC1;<br>YPL134C                | metabolic<br>process;transport                                                                            | membrane;mitochondrion                          | structural<br>molecule<br>activity;transporte<br>r activity          | 7.799  | 4.995  | 0.64 |
| Q03976 | 37S ribosomal protein S24,<br>mitochondrial<br>[OS=Saccharomyces cerevisiae<br>S288c]                                    | 851755      | RSM24;<br>YDR175C               | cell organization and<br>biogenesis;metabolic<br>process                                                  | mitochondrion;ribosome                          | structural<br>molecule activity                                      | 0.905  | 0.585  | 0.65 |
| P39533 | Homocitrate dehydratase,<br>mitochondrial<br>[OS=Saccharomyces cerevisiae<br>S288c]                                      | 853230      | ACO2;<br>YJL200C                | metabolic process                                                                                         | mitochondrion                                   | catalytic<br>activity;metal ion<br>binding                           | 0.17   | 0.11   | 0.65 |
| P53266 | Cytochrome oxidase assembly<br>protein SHY1<br>[OS=Saccharomyces cerevisiae<br>S288c]                                    | 853009      | SHY1;<br>YGR112<br>W            | cell organization and<br>biogenesis                                                                       | membrane;mitochondrion                          | protein binding                                                      | 1.783  | 1.154  | 0.65 |
| Q04728 | Arginine biosynthesis<br>bifunctional protein Arg1,<br>mitochondrial<br>[OS=Saccharomyces cerevisiae<br>S288c]           | 855084      | ARG7;<br>YMR062<br>C            | metabolic process                                                                                         | mitochondrion;organelle lumen                   | catalytic activity                                                   | 1.154  | 0.748  | 0.65 |
| P43567 | alanine-glyoxylate<br>aminotransferase 1<br>[OS=Saccharomyces cerevisiae<br>S288c]                                       | 850514      | AGX1;<br>YFL030W                | metabolic process                                                                                         | cytosol;mitochondrion                           | catalytic activity                                                   | 2.481  | 1.61   | 0.65 |
| P33311 | ATP-dependent permease<br>MDL2, mitochondrial<br>[OS=Saccharomyces cerevisiae<br>S288c]                                  | 855858      | MDL2;<br>YPL270<br>W            | response to<br>stimulus;transport                                                                         | membrane;mitochondrion                          | catalytic<br>activity;nucleotide<br>binding;transporte<br>r activity | 1.233  | 0.802  | 0.65 |
| P34227 | Mitochondrial peroxiredoxin<br>PRX1 [OS=Saccharomyces<br>cerevisiae S288c]                                               | 852215      | PRX1;<br>YBL064C                | cellular<br>homeostasis;metabolic<br>process;regulation of<br>biological process;response<br>to stimulus  | mitochondrion                                   | antioxidant<br>activity;catalytic<br>activity                        | 6.848  | 4.456  | 0.65 |
| Q08179 | Mitochondrial distribution and<br>morphology protein 38<br>[OS=Saccharomyces cerevisiae<br>S288c]                        | 854130      | MDM38;<br>YOL027C               | cell organization and<br>biogenesis;cellular<br>homeostasis;regulation of<br>biological process;transport | membrane;mitochondrion                          |                                                                      | 5.683  | 3.732  | 0.66 |
| Q00711 | Succinate dehydrogenase<br>[ubiquinone] flavoprotein<br>subunit, mitochondrial<br>[OS=Saccharomyces cerevisiae<br>S288c] | 853709      | SDH1;<br>YKL148C                | metabolic<br>process;transport                                                                            | membrane;mitochondrion                          | catalytic<br>activity;nucleotide<br>binding;protein<br>binding       | 18.619 | 12.242 | 0.66 |
| P07275 | Delta-1-pyrroline-5-carboxylate<br>dehydrogenase, mitochondrial<br>[OS=Saccharomyces cerevisiae<br>S288c]                | 856432      | PUT2;<br>YHR037<br>W            | metabolic process                                                                                         | membrane;mitochondrion;organelle lumen          | catalytic activity                                                   | 6.565  | 4.337  | 0.66 |
| P19414 | Aconitate hydratase,<br>mitochondrial<br>[OS=Saccharomyces cerevisiae<br>S288c]                                          | 851013      | ACO1;<br>YLR304C                | cell organization and<br>biogenesis;metabolic<br>process;transport                                        | cytoplasm;cytosol;mitochondrion;organelle lumen | catalytic<br>activity;DNA<br>binding;metal ion<br>binding            | 66.002 | 43.893 | 0.67 |

|          |                                                                                                              |        |                   |                                                                                                                    |                                       |                                                                                     |        |        |      |
|----------|--------------------------------------------------------------------------------------------------------------|--------|-------------------|--------------------------------------------------------------------------------------------------------------------|---------------------------------------|-------------------------------------------------------------------------------------|--------|--------|------|
| P14832   | peptidyl-prolyl cis-trans isomerase [OS=Saccharomyces cerevisiae S288c]                                      | 851733 | CPR1; YDR155C     | cell differentiation;cell organization and biogenesis;metabolic process;regulation of biological process;transport | cytoplasm;mitochondrion;nucleus       | catalytic activity;RNA binding                                                      | 1.31   | 0.874  | 0.67 |
| P06208-1 | 2-isopropylmalate synthase [OS=Saccharomyces cerevisiae S288c]                                               | 855619 | LEU4; YNL104C     | metabolic process                                                                                                  | cytoplasm;mitochondrion               | catalytic activity;protein binding                                                  | 9      | 6.017  | 0.67 |
| Q05931   | Heat shock protein Ssq1, mitochondrial [OS=Saccharomyces cerevisiae S288c]                                   | 851084 | SSQ1; YLR369W     | cell organization and biogenesis;metabolic process                                                                 | mitochondrion;organelle lumen         | nucleotide binding;protein binding                                                  | 0.995  | 0.679  | 0.68 |
| P07143   | Cytochrome c1, heme protein, mitochondrial [OS=Saccharomyces cerevisiae S288c]                               | 854231 | CYT1; YOR065W     | metabolic process;transport                                                                                        | cytosol;membrane;mitochondrion        | metal ion binding                                                                   | 19.309 | 13.251 | 0.69 |
| P40098   | uncharacterized mitochondrial membrane protein Fmp10 [OS=Saccharomyces cerevisiae S288c]                     | 856931 | FMP10; YER182W    |                                                                                                                    | membrane;mitochondrion                |                                                                                     | 2.36   | 1.637  | 0.69 |
| Q12029   | Probable mitochondrial transport protein fsf1 [OS=Saccharomyces cerevisiae S288c]                            | 854445 | FSF1; YOR271C     | transport                                                                                                          | membrane;mitochondrion                | transporter activity                                                                | 2.36   | 1.637  | 0.69 |
| Q99297   | Mitochondrial 2-oxodocarboxylate carrier 2 [OS=Saccharomyces cerevisiae S288c]                               | 854397 | ODC2; YOR222W     | metabolic process;transport                                                                                        | membrane;mitochondrion                | structural molecule activity;transporter activity                                   | 0.778  | 0.54   | 0.69 |
| P32316   | acetyl-CoA hydrolase [OS=Saccharomyces cerevisiae S288c]                                                     | 852266 | ACH1; YBL015W     | metabolic process                                                                                                  | cytoplasm;cytosol;mitochondrion       | catalytic activity                                                                  | 29.539 | 20.544 | 0.70 |
| Q02486   | ARS-binding factor 2, mitochondrial [OS=Saccharomyces cerevisiae S288c]                                      | 855094 | ABF2; YMR072W     | cell organization and biogenesis;metabolic process;regulation of biological process                                | chromosome;mitochondrion;nucleus      | DNA binding                                                                         | 69.17  | 48.239 | 0.70 |
| P33310   | ATP-dependent permease MDL1, mitochondrial [OS=Saccharomyces cerevisiae S288c]                               | 850885 | MDL1; YLR188W     | transport                                                                                                          | membrane;mitochondrion                | catalytic activity;nucleotide binding;transporter activity                          | 0.624  | 0.438  | 0.70 |
| Q12251   | Uncharacterized mitochondrial carrier Ypr011C [OS=Saccharomyces cerevisiae S288c]                            | 856121 | YPR011C ; YPR011C | metabolic process;transport                                                                                        | membrane;mitochondrion                | structural molecule activity;transporter activity                                   | 0.551  | 0.389  | 0.71 |
| Q12482   | Mitochondrial aspartate-glutamate transporter Agc1 [OS=Saccharomyces cerevisiae S288c]                       | 856132 | AGC1; YPR021C     | metabolic process;transport                                                                                        | membrane;mitochondrion                | structural molecule activity;transporter activity                                   | 0.407  | 0.292  | 0.72 |
| P32191   | Glycerol-3-phosphate dehydrogenase, mitochondrial [OS=Saccharomyces cerevisiae S288c]                        | 854651 | GUT2; YIL155C     | metabolic process                                                                                                  | membrane;mitochondrion                | catalytic activity                                                                  | 9.502  | 6.827  | 0.72 |
| Q04172   | Sensitive to high expression protein 9, mitochondrial [OS=Saccharomyces cerevisiae S288c]                    | 852002 | SHE9; YDR393W     | cell organization and biogenesis                                                                                   | membrane;mitochondrion                |                                                                                     | 0.374  | 0.269  | 0.72 |
| P33421   | Succinate dehydrogenase [ubiquinone] cytochrome b subunit, mitochondrial [OS=Saccharomyces cerevisiae S288c] | 853716 | SDH3; YKL141W     | cell organization and biogenesis;metabolic process;transport                                                       | membrane;mitochondrion                | catalytic activity;metal ion binding                                                | 1.276  | 0.931  | 0.73 |
| P32787   | Mitochondrial genome maintenance protein Mgm101 [OS=Saccharomyces cerevisiae S288c]                          | 853609 | MGM101; YJR144W   | cell organization and biogenesis;metabolic process;response to stimulus                                            | chromosome;mitochondrion              | DNA binding                                                                         | 4.456  | 3.281  | 0.74 |
| P00401   | Cytochrome c oxidase subunit 1 [OS=Saccharomyces cerevisiae S288c]                                           | 854598 | COX1; Q0045       | metabolic process;transport                                                                                        | membrane;mitochondrion                | catalytic activity;metal ion binding;transporter activity                           | 2.162  | 1.61   | 0.74 |
| P32843   | Mitochondrial escape protein 2 [OS=Saccharomyces cerevisiae S288c]                                           | 855348 | YME2; YMR302C     | cell organization and biogenesis;metabolic process                                                                 | membrane;mitochondrion                | nucleotide binding;RNA binding                                                      | 3.112  | 2.36   | 0.76 |
| P00128   | Cytochrome b-c1 complex subunit 7 [OS=Saccharomyces cerevisiae S288c]                                        | 852142 | QCR7; YDR529C     | cell organization and biogenesis;metabolic process;transport                                                       | membrane;mitochondrion                | catalytic activity;transporter activity                                             | 15.681 | 11.915 | 0.76 |
| P32335   | Protein Mss51, mitochondrial [OS=Saccharomyces cerevisiae S288c]                                             | 850900 | MSS51; YLR203C    | metabolic process;regulation of biological process                                                                 | membrane;mitochondrion                | protein binding;translation regulator activity                                      | 1.512  | 1.154  | 0.76 |
| P04710   | ADP,ATP carrier protein 1 [OS=Saccharomyces cerevisiae S288c]                                                | 855078 | AAC1; YMR056C     | metabolic process;transport                                                                                        | cytosol;membrane;mitochondrion        | structural molecule activity;transporter activity                                   | 10.288 | 7.859  | 0.76 |
| P28834   | Isocitrate dehydrogenase [NAD] subunit 1, mitochondrial [OS=Saccharomyces cerevisiae S288c]                  | 855691 | IDH1; YNL037C     | metabolic process;transport                                                                                        | cytosol;mitochondrion;organelle lumen | catalytic activity;metal ion binding;nucleotide binding;protein binding;RNA binding | 15.238 | 11.743 | 0.77 |
| P40513   | Mitochondrial acidic protein Mam33 [OS=Saccharomyces cerevisiae S288c]                                       | 854740 | MAM33; YIL070C    | metabolic process;regulation of biological process                                                                 | mitochondrion;organelle lumen         | translation regulator activity                                                      | 3.642  | 2.831  | 0.78 |

|        |                                                                                                                      |        |                  |                                                                                   |                                              |                                                                           |        |        |      |
|--------|----------------------------------------------------------------------------------------------------------------------|--------|------------------|-----------------------------------------------------------------------------------|----------------------------------------------|---------------------------------------------------------------------------|--------|--------|------|
| P00410 | Cytochrome c oxidase subunit 2 [OS=Saccharomyces cerevisiae S288c]                                                   | 854622 | COX2; Q0250      | metabolic process;transport                                                       | membrane;mitochondrion                       | catalytic activity;metal ion binding;protein binding;transporter activity | 3.642  | 2.831  | 0.78 |
| P36521 | 54S ribosomal protein L11, mitochondrial [OS=Saccharomyces cerevisiae S288c]                                         | 851325 | MRPL11; YDL202W  | cell organization and biogenesis;metabolic process                                | mitochondrion;ribosome                       | structural molecule activity                                              | 1.069  | 0.833  | 0.78 |
| P51998 | 54S ribosomal protein yml6, mitochondrial [OS=Saccharomyces cerevisiae S288c]                                        | 854983 | YML6; YML025C    | cell organization and biogenesis;metabolic process                                | mitochondrion;ribosome                       | RNA binding;structural molecule activity                                  | 0.931  | 0.73   | 0.78 |
| P00427 | Cytochrome c oxidase subunit 6, mitochondrial [OS=Saccharomyces cerevisiae S288c]                                    | 856448 | COX6; YHR051W    | metabolic process;transport                                                       | membrane;mitochondrion                       | catalytic activity;metal ion binding;transporter activity                 | 4.623  | 3.642  | 0.79 |
| P39952 | Mitochondrial inner membrane protein OXA1 [OS=Saccharomyces cerevisiae S288c]                                        | 856898 | OXA1; YER154W    | cell organization and biogenesis;transport                                        | membrane;mitochondrion                       | transporter activity                                                      | 1.738  | 1.371  | 0.79 |
| P40495 | Homoisocitrate dehydrogenase, mitochondrial [OS=Saccharomyces cerevisiae S288c]                                      | 854714 | LYS12; YIL094C   | metabolic process                                                                 | mitochondrion                                | catalytic activity;metal ion binding;nucleotide binding                   | 6.499  | 5.19   | 0.80 |
| Q03798 | Altered inheritance of mitochondria protein 36, mitochondrial [OS=Saccharomyces cerevisiae S288c]                    | 855189 | AIM36; YMR157C   |                                                                                   | membrane;mitochondrion                       |                                                                           | 1.336  | 1.069  | 0.80 |
| P40008 | Protein FMP52, mitochondrial [OS=Saccharomyces cerevisiae S288c]                                                     | 856721 | FMP52; YER004W   |                                                                                   | endoplasmic reticulum;membrane;mitochondrion | catalytic activity                                                        | 2.162  | 1.738  | 0.80 |
| P07342 | Acetolactate synthase catalytic subunit, mitochondrial [OS=Saccharomyces cerevisiae S288c]                           | 855135 | ILV2; YMR108W    | metabolic process                                                                 | mitochondrion                                | catalytic activity;metal ion binding;nucleotide binding                   | 5.236  | 4.223  | 0.81 |
| P47127 | Altered inheritance of mitochondria protein 24, mitochondrial [OS=Saccharomyces cerevisiae S288c]                    | 853543 | AIM24; YJR080C   | cell organization and biogenesis                                                  | mitochondrion                                |                                                                           | 3.175  | 2.562  | 0.81 |
| Q12298 | uncharacterized ABC transporter ATP-binding protein YDR061W [OS=Saccharomyces cerevisiae S288c]                      | 851633 | YDR061W; YDR061W |                                                                                   | mitochondrion                                | catalytic activity;nucleotide binding                                     | 0.425  | 0.343  | 0.81 |
| P25719 | Peptidyl-prolyl cis-trans isomerase C, mitochondrial [OS=Saccharomyces cerevisiae S288c]                             | 854897 | CPR3; YML078W    | cell death;metabolic process                                                      | mitochondrion;organelle lumen                | catalytic activity                                                        | 2.981  | 2.415  | 0.81 |
| Q08822 | Probable electron transfer flavoprotein-ubiquinone oxidoreductase, mitochondrial [OS=Saccharomyces cerevisiae S288c] | 854538 | CIR2; YOR356W    | metabolic process;transport                                                       | membrane;mitochondrion                       | catalytic activity;metal ion binding;nucleotide binding                   | 3.019  | 2.481  | 0.82 |
| P38885 | Altered inheritance of mitochondria protein 46, mitochondrial [OS=Saccharomyces cerevisiae S288c]                    | 856606 | AIM46; YHR199C   |                                                                                   | mitochondrion                                | catalytic activity                                                        | 1.404  | 1.154  | 0.82 |
| P47045 | mitochondrial import inner membrane translocase subunit TIM54 [OS=Saccharomyces cerevisiae S288c]                    | 853392 | TIM54; YJL054W   | cell organization and biogenesis;transport                                        | cytosol;membrane;mitochondrion               | transporter activity                                                      | 0.655  | 0.54   | 0.82 |
| P39925 | Mitochondrial respiratory chain complexes assembly protein AFG3 [OS=Saccharomyces cerevisiae S288c]                  | 856737 | AFG3; YER017C    | cell organization and biogenesis;metabolic process;response to stimulus;transport | membrane;mitochondrion                       | catalytic activity;metal ion binding;nucleotide binding;protein binding   | 1.228  | 1.015  | 0.83 |
| Q06678 | 54S ribosomal protein L35, mitochondrial [OS=Saccharomyces cerevisiae S288c]                                         | 851921 | MRPL35; YDR322W  | cell organization and biogenesis;metabolic process                                | mitochondrion;ribosome                       | structural molecule activity                                              | 1.424  | 1.219  | 0.86 |
| P32317 | Protein AFG1 [OS=Saccharomyces cerevisiae S288c]                                                                     | 856658 | AFG1; YEL052W    | cell organization and biogenesis;metabolic process;response to stimulus;transport | membrane;mitochondrion                       | catalytic activity;nucleotide binding                                     | 1.154  | 0.995  | 0.86 |
| P32891 | D-lactate dehydrogenase [cytochrome] 1, mitochondrial [OS=Saccharomyces cerevisiae S288c]                            | 851380 | DLD1; YDL174C    | metabolic process;transport                                                       | membrane;mitochondrion                       | catalytic activity;nucleotide binding                                     | 13.03  | 11.253 | 0.86 |
| P33303 | Succinate/fumarate mitochondrial transporter [OS=Saccharomyces cerevisiae S288c]                                     | 853558 | SFC1; YJR095W    | metabolic process;transport                                                       | membrane;mitochondrion                       | structural molecule activity;transporter activity                         | 17.957 | 15.681 | 0.87 |
| P46367 | Potassium-activated aldehyde dehydrogenase, mitochondrial [OS=Saccharomyces cerevisiae S288c]                        | 854556 | ALD4; YOR374W    | metabolic process                                                                 | mitochondrion;organelle lumen                | catalytic activity                                                        | 58.078 | 50.795 | 0.87 |

|        |                                                                                                                                                       |        |                        |                                                                                     |                                                |                                                                           |         |         |      |
|--------|-------------------------------------------------------------------------------------------------------------------------------------------------------|--------|------------------------|-------------------------------------------------------------------------------------|------------------------------------------------|---------------------------------------------------------------------------|---------|---------|------|
| P32473 | Pyruvate dehydrogenase E1 component subunit beta, mitochondrial [OS=Saccharomyces cerevisiae S288c]                                                   | 852522 | PDB1; YBR221C          | metabolic process                                                                   | mitochondrion;organelle lumen                  | catalytic activity                                                        | 10.288  | 9       | 0.87 |
| P40341 | Mitochondrial respiratory chain complexes assembly protein YTA12 [OS=Saccharomyces cerevisiae S288c]                                                  | 855114 | YTA12; YMR089C         | cell organization and biogenesis;metabolic process;response to stimulus;transport   | cytoplasm;membrane;mitochondrion               | catalytic activity;metal ion binding;nucleotide binding;protein binding   | 1.795   | 1.575   | 0.88 |
| P52893 | probable alanine aminotransferase, mitochondrial [OS=Saccharomyces cerevisiae S288c]                                                                  | 850778 | ALT1; YLR089C          | metabolic process                                                                   | mitochondrion;organelle lumen                  | catalytic activity                                                        | 1.438   | 1.264   | 0.88 |
| P50085 | Prohibitin-2 [OS=Saccharomyces cerevisiae S288c]                                                                                                      | 853146 | PHB2; YGR231C          | cell organization and biogenesis;metabolic process;regulation of biological process | membrane;mitochondrion                         | protein binding                                                           | 4.926   | 4.337   | 0.88 |
| P18239 | ADP,ATP carrier protein 2 [OS=Saccharomyces cerevisiae S288c]                                                                                         | 852250 | PET9; YBL030C          | cell death;metabolic process;transport                                              | membrane;mitochondrion                         | structural molecule activity;transporter activity                         | 135.887 | 122.285 | 0.90 |
| P49367 | Homoaconitase, mitochondrial [OS=Saccharomyces cerevisiae S288c]                                                                                      | 851820 | LYS4; YDR234W          | metabolic process                                                                   | mitochondrion                                  | catalytic activity;metal ion binding;protein binding                      | 1.276   | 1.154   | 0.90 |
| P36013 | NAD-dependent malic enzyme, mitochondrial [OS=Saccharomyces cerevisiae S288c]                                                                         | 853839 | MAE1; YKL029C          | metabolic process                                                                   | mitochondrion;organelle lumen                  | catalytic activity;metal ion binding;nucleotide binding                   | 2.35    | 2.162   | 0.92 |
| P40215 | External NADH-ubiquinone oxidoreductase 1, mitochondrial [OS=Saccharomyces cerevisiae S288c]                                                          | 855176 | NDE1; YMR145C          | metabolic process                                                                   | mitochondrion                                  | catalytic activity;nucleotide binding                                     | 5.469   | 5.078   | 0.93 |
| P07257 | Cytochrome b-c1 complex subunit 2, mitochondrial [OS=Saccharomyces cerevisiae S288c]                                                                  | 856321 | QCR2; YPR191W          | metabolic process;transport                                                         | membrane;mitochondrion                         | catalytic activity;metal ion binding;protein binding;transporter activity | 33.551  | 33.551  | 1.00 |
| P36112 | MICOS complex subunit Mic60 [OS=Saccharomyces cerevisiae S288c]                                                                                       | 853886 | FCJ1; MIC60; YKR016W   | cell organization and biogenesis;transport                                          | membrane;mitochondrion                         |                                                                           | 12.895  | 12.895  | 1.00 |
| P23641 | mitochondrial phosphate carrier protein [OS=Saccharomyces cerevisiae S288c]                                                                           | 853540 | MIR1; YJR077C          | metabolic process;transport                                                         | membrane;mitochondrion                         | protein binding;structural molecule activity;transporter activity         | 26.826  | 26.826  | 1.00 |
| P36060 | NADH-cytochrome b5 reductase 2 [OS=Saccharomyces cerevisiae S288c]                                                                                    | 853707 | MCR1; YKL150W          | metabolic process;response to stimulus                                              | membrane;mitochondrion                         | catalytic activity;protein binding                                        | 19.691  | 19.691  | 1.00 |
| P19262 | Dihydropolypyllysine-residue succinyltransferase component of 2-oxoglutarate dehydrogenase complex, mitochondrial [OS=Saccharomyces cerevisiae S288c] | 851726 | KGD2; YDR148C          | cell organization and biogenesis;metabolic process                                  | mitochondrion                                  | catalytic activity;protein binding                                        | 5.7     | 5.7     | 1.00 |
| P25613 | Accumulation of dyads protein 2 [OS=Saccharomyces cerevisiae S288c]                                                                                   | 850368 | ADY2; YCR010C          | transport                                                                           | membrane;mitochondrion;vacuole                 | transporter activity                                                      | 12.895  | 12.895  | 1.00 |
| Q12335 | Protoplast secreted protein 2 [OS=Saccharomyces cerevisiae S288c]                                                                                     | 851596 | PST2; YDR032C          | metabolic process;regulation of biological process                                  | cytoplasm;extracellular;membrane;mitochondrion | catalytic activity;nucleotide binding;protein binding                     | 4.012   | 4.012   | 1.00 |
| P81449 | ATP synthase subunit e, mitochondrial [OS=Saccharomyces cerevisiae S288c]                                                                             | 851922 | TIM11; YDR322C-A       | cell organization and biogenesis;metabolic process;transport                        | membrane;mitochondrion                         | catalytic activity;structural molecule activity;transporter activity      | 9       | 9       | 1.00 |
| Q07349 | MIOREX complex component 9 [OS=Saccharomyces cerevisiae S288c]                                                                                        | 851535 | YDL027C; MRX9; YDL027C |                                                                                     | endoplasmic reticulum;membrane;mitochondrion   |                                                                           | 1.913   | 1.913   | 1.00 |
| P00044 | Cytochrome c iso-1 [OS=Saccharomyces cerevisiae S288c]                                                                                                | 853507 | CYC1; YJR048W          | metabolic process;transport                                                         | mitochondrion                                  | metal ion binding;protein binding                                         | 12.335  | 12.335  | 1.00 |
| P38325 | Mitochondrial outer membrane protein OM14 [OS=Saccharomyces cerevisiae S288c]                                                                         | 852531 | OM14; YBR230C          | transport                                                                           | membrane;mitochondrion                         |                                                                           | 9       | 9       | 1.00 |
| Q08023 | Protein FMP25, mitochondrial [OS=Saccharomyces cerevisiae S288c]                                                                                      | 850766 | FMP25; YLR077W         | cell organization and biogenesis                                                    | membrane;mitochondrion                         |                                                                           | 0.968   | 0.968   | 1.00 |
| P53721 | Respiratory supercomplex factor 2, mitochondrial [OS=Saccharomyces cerevisiae S288c]                                                                  | 855752 | RCF2; YNR018W          | cell organization and biogenesis                                                    | membrane;mitochondrion                         |                                                                           | 7.111   | 7.111   | 1.00 |



|        |                                                                                                   |        |                        |                                                                                                                                              |                                         |                                                                                                    |       |       |      |
|--------|---------------------------------------------------------------------------------------------------|--------|------------------------|----------------------------------------------------------------------------------------------------------------------------------------------|-----------------------------------------|----------------------------------------------------------------------------------------------------|-------|-------|------|
| Q12289 | mitochondrial carnitine carrier [OS=Saccharomyces cerevisiae S288c]                               | 854267 | CRC1; YOR100C          | metabolic process;transport                                                                                                                  | membrane;mitochondrion                  | structural molecule activity;transporter activity                                                  | 0.931 | 0.931 | 1.00 |
| P10823 | Guanine nucleotide-binding protein alpha-2 subunit [OS=Saccharomyces cerevisiae S288c]            | 856741 | GPA2; YER020W          | cell differentiation;cell growth;cell organization and biogenesis;cellular homeostasis;regulation of biological process;response to stimulus | cytosol;membrane;mitochondrion          | catalytic activity;metal ion binding;nucleotide binding;protein binding;signal transducer activity | 0.978 | 0.978 | 1.00 |
| P39006 | Phosphatidylserine decarboxylase proenzyme 1, mitochondrial [OS=Saccharomyces cerevisiae S288c]   | 855552 | PSD1; YNL169C          | metabolic process;regulation of biological process                                                                                           | membrane;mitochondrion                  | catalytic activity                                                                                 | 0.487 | 0.487 | 1.00 |
| Q12374 | Nuclear control of ATPase protein 2 [OS=Saccharomyces cerevisiae S288c]                           | 856278 | NCA2; YPR155C          | metabolic process                                                                                                                            | membrane;mitochondrion                  |                                                                                                    | 0.565 | 0.565 | 1.00 |
| P21560 | Protein CBP3, mitochondrial [OS=Saccharomyces cerevisiae S288c]                                   | 855886 | CBP3; YPL215W          | cell organization and biogenesis;regulation of biological process                                                                            | membrane;mitochondrion;ribosome         |                                                                                                    | 1.031 | 1.031 | 1.00 |
| P07253 | cytochrome B pre-mRNA-processing protein 6 [OS=Saccharomyces cerevisiae S288c]                    | 852417 | CBP6; YBR120C          | cell organization and biogenesis;metabolic process;regulation of biological process                                                          | mitochondrion;ribosome                  |                                                                                                    | 2.728 | 2.728 | 1.00 |
| P38910 | 10 kDa heat shock protein, mitochondrial [OS=Saccharomyces cerevisiae S288c]                      | 854185 | HSP10; YOR020C         | cell organization and biogenesis;metabolic process;response to stimulus;transport                                                            | cytoplasm;mitochondrion;organelle lumen | metal ion binding;nucleotide binding;protein binding                                               | 4.623 | 4.623 | 1.00 |
| Q06143 | mitochondrial dicarboxylate transporter [OS=Saccharomyces cerevisiae S288c]                       | 851063 | DIC1; YLR348C          | metabolic process;transport                                                                                                                  | membrane;mitochondrion                  | structural molecule activity;transporter activity                                                  | 1.154 | 1.154 | 1.00 |
| P40416 | Iron-sulfur clusters transporter ATM1, mitochondrial [OS=Saccharomyces cerevisiae S288c]          | 855347 | ATM1; YMR301C          | cellular homeostasis;metabolic process;transport                                                                                             | membrane;mitochondrion                  | catalytic activity;nucleotide binding;transporter activity                                         | 0.453 | 0.453 | 1.00 |
| P50945 | MICOS complex subunit MIC27 [OS=Saccharomyces cerevisiae S288c]                                   | 855623 | AIM37; MIC27; YNL100W  | cell organization and biogenesis                                                                                                             | membrane;mitochondrion                  |                                                                                                    | 1.254 | 1.254 | 1.00 |
| Q14467 | multiprotein-bridging factor 1 [OS=Saccharomyces cerevisiae S288c]                                | 854474 | MBF1; YOR298C-A        | metabolic process;regulation of biological process                                                                                           | cytoplasm;mitochondrion;nucleus         | DNA binding                                                                                        | 1.31  | 1.31  | 1.00 |
| P32907 | Ammonia transport outward protein 2 [OS=Saccharomyces cerevisiae S288c]                           | 855736 | ATO2; YNR002C          | transport                                                                                                                                    | membrane;mitochondrion;vacuole          | transporter activity                                                                               | 0.874 | 0.874 | 1.00 |
| P53311 | Mitochondrial pyruvate carrier 3 [OS=Saccharomyces cerevisiae S288c]                              | 853158 | FMP43; MPC3; YGR243W   | transport                                                                                                                                    | membrane;mitochondrion                  | transporter activity                                                                               | 1.154 | 1.154 | 1.00 |
| P40502 | Altered inheritance of mitochondria protein 19, mitochondrial [OS=Saccharomyces cerevisiae S288c] | 854722 | AIM19; YIL087C         |                                                                                                                                              | membrane;mitochondrion                  |                                                                                                    | 0.995 | 0.995 | 1.00 |
| Q01519 | Cytochrome c oxidase subunit 6b [OS=Saccharomyces cerevisiae S288c]                               | 850727 | COX12; YLR038C         | cell organization and biogenesis;metabolic process;transport                                                                                 | mitochondrion                           | catalytic activity;transporter activity                                                            | 3.642 | 3.642 | 1.00 |
| Q06567 | ABC1 family protein MCP2 [OS=Saccharomyces cerevisiae S288c]                                      | 850955 | YLR253W; MCP2; YLR253W | cell organization and biogenesis                                                                                                             | membrane;mitochondrion                  |                                                                                                    | 0.218 | 0.218 | 1.00 |
| P37299 | cytochrome b-c1 complex subunit 10 [OS=Saccharomyces cerevisiae S288c]                            | 856390 | QCR10; YHR001W-A       | metabolic process;transport                                                                                                                  | membrane;mitochondrion                  | catalytic activity;transporter activity                                                            | 5.31  | 5.31  | 1.00 |
| Q12233 | ATP synthase subunit g, mitochondrial [OS=Saccharomyces cerevisiae S288c]                         | 856131 | ATP20; YPR020W         | cell organization and biogenesis;metabolic process;transport                                                                                 | membrane;mitochondrion                  | catalytic activity;transporter activity                                                            | 1.371 | 1.371 | 1.00 |
| P40159 | Uncharacterized protein YNL208W [OS=Saccharomyces cerevisiae S288c]                               | 855513 | YNL208W; YNL208W       |                                                                                                                                              | membrane;mitochondrion;ribosome         |                                                                                                    | 0.668 | 0.668 | 1.00 |
| Q03327 | Mitochondrial fusion and transport protein Ugo1 [OS=Saccharomyces cerevisiae S288c]               | 852081 | UGO1; YDR470C          | cell organization and biogenesis;metabolic process                                                                                           | membrane;mitochondrion                  | protein binding;structural molecule activity                                                       | 0.425 | 0.425 | 1.00 |
| Q6Q560 | Protein isd11 [OS=Saccharomyces cerevisiae S288c]                                                 | 856774 | ISD11; YER048W-A       | cell organization and biogenesis;metabolic process                                                                                           | mitochondrion;organelle lumen           | catalytic activity;protein binding                                                                 | 1.783 | 1.783 | 1.00 |
| Q12375 | mitochondrial ornithine transporter 1 [OS=Saccharomyces cerevisiae S288c]                         | 854297 | ORT1; YOR130C          | metabolic process;transport                                                                                                                  | membrane;mitochondrion                  | structural molecule activity;transporter activity                                                  | 0.54  | 0.54  | 1.00 |
| P41911 | Glycerol-3-phosphate dehydrogenase [NAD(+)] 2, mitochondrial [OS=Saccharomyces cerevisiae S288c]  | 854095 | GPD2; YOL059W          | metabolic process                                                                                                                            | cytoplasm;cytosol;mitochondrion         | catalytic activity;nucleotide binding;protein binding                                              | 0.186 | 0.186 | 1.00 |

|          |                                                                                                                |        |                        |                                                                         |                                                 |                                                                |       |       |      |
|----------|----------------------------------------------------------------------------------------------------------------|--------|------------------------|-------------------------------------------------------------------------|-------------------------------------------------|----------------------------------------------------------------|-------|-------|------|
| P53220   | Mitochondrial import inner membrane translocase subunit TIM21 [OS=Saccharomyces cerevisiae S288c]              | 852921 | TIM21; YGR033C         | cell organization and biogenesis;transport                              | membrane;mitochondrion                          | protein binding                                                | 0.719 | 0.719 | 1.00 |
| P38702   | mitochondrial carrier protein LEU5 [OS=Saccharomyces cerevisiae S288c]                                         | 856391 | LEU5; YHR002W          | metabolic process;transport                                             | membrane;mitochondrion                          | structural molecule activity;transporter activity              | 0.334 | 0.334 | 1.00 |
| P36147   | Presequence translocated-associated motor subunit pam17, mitochondrial [OS=Saccharomyces cerevisiae S288c]     | 853939 | PAM17; YKR065C         | transport                                                               | membrane;mitochondrion                          |                                                                | 1.371 | 1.371 | 1.00 |
| Q02883   | N-acyl-phosphatidylethanolamine-hydrolyzing phospholipase D, mitochondrial [OS=Saccharomyces cerevisiae S288c] | 856001 | FMP30; YPL103C         | metabolic process                                                       | membrane;mitochondrion                          | catalytic activity;metal ion binding                           | 0.425 | 0.425 | 1.00 |
| P36526   | 54S ribosomal protein L27, mitochondrial [OS=Saccharomyces cerevisiae S288c]                                   | 852585 | MRPL27; YBR282W        | cell organization and biogenesis;metabolic process                      | mitochondrion;ribosome                          | structural molecule activity                                   | 0.995 | 0.995 | 1.00 |
| P53163   | 54S ribosomal protein L12, mitochondrial [OS=Saccharomyces cerevisiae S288c]                                   | 852811 | MNP1; YGL068W          | cell organization and biogenesis;metabolic process                      | mitochondrion;ribosome                          | RNA binding;structural molecule activity                       | 1.31  | 1.31  | 1.00 |
| Q01532-1 | Cysteine proteinase 1, mitochondrial [OS=Saccharomyces cerevisiae S288c]                                       |        |                        | metabolic process;regulation of biological process;response to stimulus | cytoplasm;mitochondrion                         | catalytic activity;DNA binding;RNA binding                     | 0.179 | 0.179 | 1.00 |
| Q07914   | mitochondrial import inner membrane translocase subunit TIM14 [OS=Saccharomyces cerevisiae S288c]              | 850694 | PAM18; YLR008C         | regulation of biological process;transport                              | membrane;mitochondrion                          | enzyme regulator activity;protein binding;transporter activity | 0.778 | 0.778 | 1.00 |
| P38152   | Tricarboxylate transport protein [OS=Saccharomyces cerevisiae S288c]                                           | 852594 | CTP1; YBR291C          | metabolic process;transport                                             | membrane;mitochondrion                          | structural molecule activity;transporter activity              | 0.389 | 0.389 | 1.00 |
| P81451   | ATP synthase subunit K, mitochondrial [OS=Saccharomyces cerevisiae S288c]                                      | 854077 | ATP19; YOL077W-A       | cell organization and biogenesis;metabolic process;transport            | membrane;mitochondrion                          | catalytic activity;transporter activity                        | 3.642 | 3.642 | 1.00 |
| P25345   | Asparagine-tRNA ligase, mitochondrial [OS=Saccharomyces cerevisiae S288c]                                      | 850388 | SLM5; YCR024C          | metabolic process                                                       | cytoplasm;mitochondrion;organelle lumen         | catalytic activity;nucleotide binding                          | 0.172 | 0.172 | 1.00 |
| P49334   | Mitochondrial import receptor subunit tom22 [OS=Saccharomyces cerevisiae S288c]                                | 855592 | TOM22; YNL131W         | cell organization and biogenesis;transport                              | membrane;mitochondrion                          | protein binding;transporter activity                           | 0.292 | 0.292 | 1.00 |
| Q06005   | Octanoyltransferase, mitochondrial [OS=Saccharomyces cerevisiae S288c]                                         | 850940 | LIP2; YLR239C          | metabolic process                                                       | cytoplasm;mitochondrion                         | catalytic activity                                             | 0.245 | 0.245 | 1.00 |
| P34224   | Uncharacterized protein YBL059W [OS=Saccharomyces cerevisiae S288c]                                            | 852221 | YBL059W; YBL059W       |                                                                         | membrane;mitochondrion                          |                                                                | 0.468 | 0.468 | 1.00 |
| Q12467   | MIOREX complex component 4 [OS=Saccharomyces cerevisiae S288c]                                                 | 855935 | YPL168W; MRX4; YPL168W |                                                                         | membrane;mitochondrion                          |                                                                | 0.202 | 0.202 | 1.00 |
| P41735   | 5-demethoxyubiquinone hydroxylase, mitochondrial [OS=Saccharomyces cerevisiae S288c]                           | 854292 | CAT5; YOR125C          | metabolic process                                                       | membrane;mitochondrion                          | catalytic activity;metal ion binding                           | 0.54  | 0.54  | 1.00 |
| P22438   | Methionine-tRNA ligase, mitochondrial [OS=Saccharomyces cerevisiae S288c]                                      | 853081 | MSM1; YGR171C          | metabolic process                                                       | cytoplasm;cytosol;mitochondrion;organelle lumen | catalytic activity;nucleotide binding                          | 0.136 | 0.136 | 1.00 |
| P53320   | Mitochondrial carrier protein MTM1 [OS=Saccharomyces cerevisiae S288c]                                         | 853173 | MTM1; YGR257C          | metabolic process;transport                                             | membrane;mitochondrion                          | structural molecule activity                                   | 0.11  | 0.11  | 1.00 |
| Q3E6R5   | uncharacterized mitochondrial outer membrane protein YDR381C-A [OS=Saccharomyces cerevisiae S288c]             | 851989 | YDR381C-A; YDR381C-A   |                                                                         | membrane;mitochondrion                          |                                                                | 0.389 | 0.389 | 1.00 |
| P32463   | Acyl carrier protein, mitochondrial [OS=Saccharomyces cerevisiae S288c]                                        | 853642 | ACP1; YKL192C          | metabolic process;transport                                             | mitochondrion                                   |                                                                | 0.259 | 0.259 | 1.00 |
| P40581   | peroxiredoxin HYR1 [OS=Saccharomyces cerevisiae S288c]                                                         | 854855 | HYR1; YIR037W          | metabolic process;response to stimulus                                  | cytoplasm;cytosol;mitochondrion;organelle lumen | antioxidant activity;catalytic activity                        | 0.259 | 0.259 | 1.00 |
| Q07821   | Iron-sulfur assembly protein 1 [OS=Saccharomyces cerevisiae S288c]                                             | 850632 | ISA1; YLL027W          | cell organization and biogenesis;metabolic process                      | mitochondrion;organelle lumen                   | metal ion binding;structural molecule activity                 | 0.136 | 0.136 | 1.00 |

|        |                                                                                                               |        |                      |                                                                                              |                                        |                                                                                     |        |        |      |
|--------|---------------------------------------------------------------------------------------------------------------|--------|----------------------|----------------------------------------------------------------------------------------------|----------------------------------------|-------------------------------------------------------------------------------------|--------|--------|------|
| P04039 | Cytochrome c oxidase polypeptide VIII, mitochondrial [OS=Saccharomyces cerevisiae S288c]                      | 851111 | COX8; YLR395C        | metabolic process;transport                                                                  | membrane;mitochondrion                 | catalytic activity;transporter activity                                             | 0.778  | 0.778  | 1.00 |
| P38228 | Mitochondrial chaperone TCM62 [OS=Saccharomyces cerevisiae S288c]                                             | 852332 | TCM62; YBR044C       | cell organization and biogenesis                                                             | membrane;mitochondrion                 | nucleotide binding;protein binding                                                  | 0.129  | 0.129  | 1.00 |
| P10174 | cytochrome c oxidase subunit 7 [OS=Saccharomyces cerevisiae S288c]                                            | 855298 | COX7; YMR256C        | metabolic process;transport                                                                  | membrane;mitochondrion                 | catalytic activity;transporter activity                                             | 1.154  | 1.154  | 1.00 |
| P39515 | mitochondrial import inner membrane translocase subunit Tim17 [OS=Saccharomyces cerevisiae S288c]             | 853298 | TIM17; YJL143W       | cell organization and biogenesis;transport                                                   | membrane;mitochondrion                 | protein binding;transporter activity                                                | 0.778  | 0.778  | 1.00 |
| P38816 | thioredoxin reductase 2, mitochondrial [OS=Saccharomyces cerevisiae S288c]                                    | 856506 | TRR2; YHR106W        | cellular homeostasis;metabolic process;regulation of biological process;response to stimulus | cytoplasm;mitochondrion                | antioxidant activity;catalytic activity                                             | 0.136  | 0.136  | 1.00 |
| P25270 | rRNA methyltransferase 1, mitochondrial [OS=Saccharomyces cerevisiae S288c]                                   | 854376 | MRM1; YOR201C        | metabolic process                                                                            | mitochondrion                          | catalytic activity;RNA binding                                                      | 0.129  | 0.129  | 1.00 |
| P25578 | CDP-diacylglycerol-glycerol-3-phosphate 3-phosphatidyltransferase [OS=Saccharomyces cerevisiae S288c]         | 850352 | PGS1; YCL004W        | metabolic process                                                                            | mitochondrion                          | catalytic activity;nucleotide binding                                               | 0.083  | 0.083  | 1.00 |
| P36064 | COX assembly mitochondrial protein [OS=Saccharomyces cerevisiae S288c]                                        | 853721 | CMC1; YKL137W        | cell organization and biogenesis                                                             | membrane;mitochondrion                 | metal ion binding                                                                   | 0.389  | 0.389  | 1.00 |
| P33314 | Inhibitory regulator protein BUD2/CLA2 [OS=Saccharomyces cerevisiae S288c]                                    | 853770 | BUD2; YKL092C        | cell division;regulation of biological process;reproduction;response to stimulus             | cytoplasm;membrane                     | enzyme regulator activity;protein binding                                           | 0.031  | 0.031  | 1.00 |
| P25038 | Translation initiation factor IF-2, mitochondrial [OS=Saccharomyces cerevisiae S288c]                         | 854135 | IFM1; YOL023W        | cell organization and biogenesis;metabolic process                                           | mitochondrion;nucleus                  | catalytic activity;nucleotide binding;RNA binding                                   | 0.054  | 0.054  | 1.00 |
| P87275 | Altered inheritance of mitochondria protein 11 [OS=Saccharomyces cerevisiae S288c]                            | 856829 | AIM11; YER093C-A     |                                                                                              | membrane;mitochondrion                 |                                                                                     | 0.389  | 0.389  | 1.00 |
| Q12497 | Protein FMP16, mitochondrial [OS=Saccharomyces cerevisiae S288c]                                              | 851642 | FMP16; YDR070C       |                                                                                              | mitochondrion                          |                                                                                     | 0.389  | 0.389  | 1.00 |
| Q06698 | Putative ATP-dependent RNA helicase YLR419W [OS=Saccharomyces cerevisiae S288c]                               | 851137 | YLR419W; YLR419W     | metabolic process                                                                            | cytoplasm;mitochondrion;nucleus        | catalytic activity;nucleotide binding;protein binding;RNA binding                   | 0.027  | 0.027  | 1.00 |
| P00045 | Cytochrome c iso-2 [OS=Saccharomyces cerevisiae S288c]                                                        | 856672 | CYC7; YEL039C        | metabolic process;transport                                                                  | mitochondrion                          | metal ion binding                                                                   | 0.259  | 0.259  | 1.00 |
| P53157 | Mitochondrial pyruvate carrier 1 [OS=Saccharomyces cerevisiae S288c]                                          | 852800 | FMP37; MPC1; YGL080W | transport                                                                                    | membrane;mitochondrion                 | transporter activity                                                                | 0.468  | 0.468  | 1.00 |
| P39103 | Cytochrome c oxidase assembly protein COX14 [OS=Saccharomyces cerevisiae S288c]                               | 854910 | COX14; YML129C       | cell organization and biogenesis;regulation of biological process                            | membrane;mitochondrion;organelle lumen | protein binding                                                                     | 0.585  | 0.585  | 1.00 |
| P38746 | Obg-like ATPase homolog [OS=Saccharomyces cerevisiae S288c]                                                   | 856372 | YLF2; YHL014C        |                                                                                              | mitochondrion                          | nucleotide binding                                                                  | 0.093  | 0.093  | 1.00 |
| P38071 | Enoyl-[acyl-carrier protein] reductase [NADPH, B-specific], mitochondrial [OS=Saccharomyces cerevisiae S288c] | 852314 | ETR1; YBR026C        | metabolic process                                                                            | mitochondrion;organelle lumen          | catalytic activity;DNA binding;metal ion binding                                    | 7.111  | 8.006  | 1.13 |
| P07246 | Alcohol dehydrogenase 3, mitochondrial [OS=Saccharomyces cerevisiae S288c]                                    | 855107 | ADH3; YMR083W        | metabolic process                                                                            | mitochondrion;organelle lumen          | catalytic activity;metal ion binding                                                | 10.159 | 11.452 | 1.13 |
| P28241 | Isocitrate dehydrogenase [NAD] subunit 2, mitochondrial [OS=Saccharomyces cerevisiae S288c]                   | 854303 | IDH2; YOR136W        | metabolic process                                                                            | mitochondrion;organelle lumen          | catalytic activity;metal ion binding;nucleotide binding;protein binding;RNA binding | 6.197  | 7.031  | 1.13 |
| P27929 | 37S ribosomal protein NAM9, mitochondrial [OS=Saccharomyces cerevisiae S288c]                                 | 855585 | NAM9; YNL137C        | cell organization and biogenesis;metabolic process;regulation of biological process          | mitochondrion;ribosome                 | RNA binding;structural molecule activity                                            | 0.931  | 1.062  | 1.14 |
| P53598 | Succinyl-CoA ligase [ADP-forming] subunit alpha, mitochondrial [OS=Saccharomyces cerevisiae S288c]            | 854310 | LSC1; YOR142W        | metabolic process                                                                            | cytosol;mitochondrion                  | catalytic activity;nucleotide binding                                               | 9      | 10.288 | 1.14 |
| P25349 | Flavoprotein-like protein YCP4 [OS=Saccharomyces cerevisiae S288c]                                            | 850360 | YCP4; YCR004C        | metabolic process;regulation of                                                              | cytoplasm;membrane;mitochondrion       | catalytic activity;nucleotide                                                       | 6.743  | 7.799  | 1.16 |

|        |                                                                                                        |        |                  |                                                                                               |                                                         |                                                                                 |        |        |      |
|--------|--------------------------------------------------------------------------------------------------------|--------|------------------|-----------------------------------------------------------------------------------------------|---------------------------------------------------------|---------------------------------------------------------------------------------|--------|--------|------|
|        | S288c]                                                                                                 |        |                  | biological process                                                                            |                                                         | binding;protein binding                                                         |        |        |      |
| Q04013 | Citrate/oxoglutarate carrier protein [OS=Saccharomyces cerevisiae S288c]                               | 855282 | YHM2; YMR241 W   | cell organization and biogenesis;metabolic process;transport                                  | membrane;mitochondrion                                  | DNA binding;structural molecule activity;transporter activity                   | 3.467  | 4.012  | 1.16 |
| P53292 | 37S ribosomal protein S35, mitochondrial [OS=Saccharomyces cerevisiae S288c]                           | 853075 | MRPS35; YGR165 W | cell organization and biogenesis;metabolic process                                            | mitochondrion;ribosome                                  | structural molecule activity                                                    | 1.512  | 1.754  | 1.16 |
| P32454 | Aminopeptidase 2, mitochondrial [OS=Saccharomyces cerevisiae S288c]                                    | 853699 | APE2; YKL157 W   | metabolic process                                                                             | cytoplasm;extracellular;membrane;mitochondrion ;nucleus | catalytic activity;metal ion binding                                            | 1.209  | 1.474  | 1.22 |
| P00950 | Phosphoglycerate mutase 1 [OS=Saccharomyces cerevisiae S288c]                                          | 853705 | GPM1; YKL152C    | metabolic process;regulation of biological process                                            | cytoplasm;cytosol;membrane;mitochondrion                | catalytic activity                                                              | 2.981  | 3.642  | 1.22 |
| P00175 | Cytochrome b2, mitochondrial [OS=Saccharomyces cerevisiae S288c]                                       | 854950 | CYB2; YML054C    | metabolic process;transport                                                                   | cytosol;membrane;mitochondrion;nucleus                  | catalytic activity;metal ion binding;nucleotide binding                         | 1.113  | 1.371  | 1.23 |
| P38771 | Ribosome-recycling factor, mitochondrial [OS=Saccharomyces cerevisiae S288c]                           | 856433 | RRF1; YHR038 W   | cell organization and biogenesis;metabolic process                                            | mitochondrion                                           | RNA binding                                                                     | 1.254  | 1.581  | 1.26 |
| P21954 | Isocitrate dehydrogenase [NADP], mitochondrial [OS=Saccharomyces cerevisiae S288c]                     | 851493 | IDP1; YDL066 W   | metabolic process                                                                             | mitochondrion                                           | catalytic activity;metal ion binding;nucleotide binding;protein binding         | 35.869 | 45.416 | 1.27 |
| P32340 | Rotenone-insensitive NADH-ubiquinone oxidoreductase, mitochondrial [OS=Saccharomyces cerevisiae S288c] | 854919 | NDI1; YML120C    | metabolic process;regulation of biological process                                            | membrane;mitochondrion;organelle lumen                  | catalytic activity;nucleotide binding                                           | 22.95  | 29.392 | 1.28 |
| P28625 | Protein YIM1 [OS=Saccharomyces cerevisiae S288c]                                                       | 855183 | YIM1; YMR152 W   | metabolic process;response to stimulus                                                        | cytoplasm;endoplasmic reticulum;mitochondrion           | catalytic activity;metal ion binding                                            | 0.833  | 1.069  | 1.28 |
| P40582 | Glutathione S-transferase 1 [OS=Saccharomyces cerevisiae S288c]                                        | 854856 | GTT1; YIRO38C    | metabolic process                                                                             | endoplasmic reticulum;membrane;mitochondrion;nucleus    | antioxidant activity;catalytic activity;protein binding;RNA binding             | 1.683  | 2.162  | 1.28 |
| POCS90 | Heat shock protein SSC1, mitochondrial [OS=Saccharomyces cerevisiae S288c]                             | 853503 | SSC1; YJR045C    | cell organization and biogenesis;metabolic process;regulation of biological process;transport | membrane;mitochondrion;nucleus;organelle lumen          | catalytic activity;enzyme regulator activity;nucleotide binding;protein binding | 51.75  | 67.129 | 1.30 |
| P53969 | Sorting assembly machinery 50 kDa subunit [OS=Saccharomyces cerevisiae S288c]                          | 855705 | SAM50; YNL026 W  | cell organization and biogenesis;transport                                                    | membrane;mitochondrion                                  | protein binding;transporter activity                                            | 0.374  | 0.487  | 1.30 |
| P07213 | Mitochondrial import receptor subunit TOM70 [OS=Saccharomyces cerevisiae S288c]                        | 855602 | TOM70; YNL121C   | cell organization and biogenesis;transport                                                    | membrane;mitochondrion                                  | protein binding;transporter activity                                            | 1.728  | 2.257  | 1.31 |
| P32611 | 54S ribosomal protein RML2, mitochondrial [OS=Saccharomyces cerevisiae S288c]                          | 856660 | RML2; YEL050C    | cell organization and biogenesis;metabolic process                                            | mitochondrion;ribosome                                  | catalytic activity;RNA binding;structural molecule activity                     | 0.389  | 0.509  | 1.31 |
| Q01852 | Mitochondrial import inner membrane translocase subunit TIM44 [OS=Saccharomyces cerevisiae S288c]      | 854790 | TIM44; YIL022W   | transport                                                                                     | membrane;mitochondrion                                  | nucleotide binding;protein binding                                              | 4.125  | 5.404  | 1.31 |
| P38988 | Mitochondrial GTP/GDP carrier protein 1 [OS=Saccharomyces cerevisiae S288c]                            | 851329 | GGC1; YDL198C    | cell organization and biogenesis;cellular homeostasis;metabolic process;transport             | membrane;mitochondrion                                  | structural molecule activity;transporter activity                               | 3.642  | 4.78   | 1.31 |
| P00424 | Cytochrome c oxidase polypeptide 5A, mitochondrial [OS=Saccharomyces cerevisiae S288c]                 | 855675 | COX5A; YNL052 W  | metabolic process;transport                                                                   | membrane;mitochondrion                                  | catalytic activity;transporter activity                                         | 1.848  | 2.511  | 1.36 |
| P54003 | Protein SUR7 [OS=Saccharomyces cerevisiae S288c]                                                       | 854953 | SUR7; YML052 W   | cell differentiation;transport                                                                | membrane;mitochondrion                                  |                                                                                 | 0.848  | 1.154  | 1.36 |
| P53982 | isocitrate dehydrogenase [NADP] [OS=Saccharomyces cerevisiae S288c]                                    | 855723 | IDP3; YNL009 W   | metabolic process                                                                             | cytoplasm;mitochondrion                                 | catalytic activity;metal ion binding;nucleotide binding                         | 1.943  | 2.652  | 1.36 |
| P41921 | glutathione reductase [OS=Saccharomyces cerevisiae S288c]                                              | 856014 | GLR1; YPL091 W   | cellular homeostasis;metabolic process;regulation of biological process;response to stimulus  | cytoplasm;cytosol;mitochondrion;nucleus                 | antioxidant activity;catalytic activity;nucleotide binding                      | 0.241  | 0.334  | 1.39 |
| P38969 | Pentamidine resistance factor, mitochondrial [OS=Saccharomyces cerevisiae S288c]                       | 854440 | PNT1; YOR266 W   | cell organization and biogenesis;response to stimulus                                         | membrane;mitochondrion                                  |                                                                                 | 0.259  | 0.359  | 1.39 |

|        |                                                                                                                                              |        |                      |                                                                                               |                                                          |                                                                   |        |        |      |
|--------|----------------------------------------------------------------------------------------------------------------------------------------------|--------|----------------------|-----------------------------------------------------------------------------------------------|----------------------------------------------------------|-------------------------------------------------------------------|--------|--------|------|
| P53230 | Phosphatidate cytidyltransferase, mitochondrial [OS=Saccharomyces cerevisiae S288c]                                                          | 852937 | TAM41; YGR046 W      | metabolic process                                                                             | membrane;mitochondrion;organelle lumen                   | catalytic activity                                                | 0.292  | 0.407  | 1.39 |
| P38077 | ATP synthase subunit gamma, mitochondrial [OS=Saccharomyces cerevisiae S288c]                                                                | 852327 | ATP3; YBR039 W       | metabolic process;transport                                                                   | membrane;mitochondrion                                   | catalytic activity;transporter activity                           | 11.328 | 15.876 | 1.40 |
| P47140 | Altered inheritance rate of mitochondria protein 25 [OS=Saccharomyces cerevisiae S288c]                                                      | 853563 | AIM25; YJR100C       | cell organization and biogenesis                                                              | membrane;mitochondrion                                   | transporter activity                                              | 0.369  | 0.52   | 1.41 |
| P22136 | ATPase expression protein 2, mitochondrial [OS=Saccharomyces cerevisiae S288c]                                                               | 855325 | AEP2; YMR282 C       | metabolic process;regulation of biological process                                            | mitochondrion                                            | RNA binding                                                       | 0.359  | 0.506  | 1.41 |
| P09624 | Dihydrolipoyl dehydrogenase, mitochondrial [OS=Saccharomyces cerevisiae S288c]                                                               | 850527 | LPD1; YFL018C        | cellular homeostasis;metabolic process;regulation of biological process                       | mitochondrion;organelle lumen                            | catalytic activity;nucleotide binding                             | 30.623 | 43.367 | 1.42 |
| P16622 | Ferrochelatase, mitochondrial [OS=Saccharomyces cerevisiae S288c]                                                                            | 854347 | HEM15; YOR176 W      | metabolic process                                                                             | membrane;mitochondrion                                   | catalytic activity                                                | 5.579  | 8.006  | 1.44 |
| P50087 | MICOS subunit MIC26 [OS=Saccharomyces cerevisiae S288c]                                                                                      | 853150 | MOS2; MIC26; YGR235C | cell organization and biogenesis                                                              | membrane;mitochondrion                                   |                                                                   | 0.638  | 0.931  | 1.46 |
| P25573 | Mitochondrial inner membrane i-AAA protease supercomplex subunit MGR1 [OS=Saccharomyces cerevisiae S288c]                                    | 850313 | MGR1; YCL044C        | metabolic process                                                                             | membrane;mitochondrion                                   | protein binding                                                   | 0.701  | 1.031  | 1.47 |
| P08466 | mitochondrial nuclease [OS=Saccharomyces cerevisiae S288c]                                                                                   | 853222 | NUC1; YJL208C        | cell death;metabolic process                                                                  | membrane;mitochondrion;nucleus                           | catalytic activity;metal ion binding                              | 1.336  | 1.976  | 1.48 |
| P00560 | Phosphoglycerate kinase [OS=Saccharomyces cerevisiae S288c]                                                                                  | 850370 | PGK1; YCR012 W       | metabolic process                                                                             | cytoplasm;membrane;mitochondrion                         | catalytic activity;nucleotide binding                             | 2.415  | 3.642  | 1.51 |
| P12695 | Dihydrolipoyllysine-residue acetyltransferase component of pyruvate dehydrogenase complex, mitochondrial [OS=Saccharomyces cerevisiae S288c] | 855653 | LAT1; YNL071 W       | metabolic process                                                                             | mitochondrion;organelle lumen                            | catalytic activity                                                | 7.003  | 10.602 | 1.51 |
| P09457 | ATP synthase subunit 5, mitochondrial [OS=Saccharomyces cerevisiae S288c]                                                                    | 851892 | ATP5; YDR298C        | metabolic process;transport                                                                   | membrane;mitochondrion                                   | catalytic activity;transporter activity                           | 9      | 13.678 | 1.52 |
| P00925 | Enolase 2 [OS=Saccharomyces cerevisiae S288c]                                                                                                | 856579 | ENO2; YHR174 W       | metabolic process;regulation of biological process                                            | cytoplasm;cytosol;membrane;mitochondrion;vacuole         | catalytic activity;metal ion binding;protein binding              | 1.043  | 1.593  | 1.53 |
| P23644 | Mitochondrial import receptor subunit TOM40 [OS=Saccharomyces cerevisiae S288c]                                                              | 855243 | TOM40; YMR203 W      | transport                                                                                     | cytosol;membrane;mitochondrion                           | protein binding;transporter activity                              | 1.154  | 1.783  | 1.55 |
| P19882 | heat shock protein 60, mitochondrial [OS=Saccharomyces cerevisiae S288c]                                                                     | 850963 | HSP60; YLR259C       | cell organization and biogenesis;metabolic process;regulation of biological process;transport | cytoplasm;cytosol;membrane;mitochondrion;organelle lumen | catalytic activity;DNA binding;nucleotide binding;protein binding | 23.816 | 36.927 | 1.55 |
| P00330 | Alcohol dehydrogenase 1 [OS=Saccharomyces cerevisiae S288c]                                                                                  | 854068 | ADH1; YOL086C        | metabolic process                                                                             | cytoplasm;membrane                                       | catalytic activity;metal ion binding                              | 3.833  | 5.952  | 1.55 |
| Q06510 | Lysophosphatidylcholine acyltransferase [OS=Saccharomyces cerevisiae S288c]                                                                  | 856262 | TAZ1; YPR140 W       | cell organization and biogenesis;metabolic process;transport                                  | membrane;mitochondrion                                   | catalytic activity                                                | 0.194  | 0.304  | 1.57 |
| P32792 | UPF0744 protein YSC83 [OS=Saccharomyces cerevisiae S288c]                                                                                    | 856410 | YSC83; YHR017 W      |                                                                                               | membrane;mitochondrion                                   |                                                                   | 0.233  | 0.369  | 1.58 |
| P54783 | D-arabinono-1,4-lactone oxidase [OS=Saccharomyces cerevisiae S288c]                                                                          | 854888 | ALO1; YML086C        | metabolic process;response to stimulus                                                        | membrane;mitochondrion                                   | catalytic activity;nucleotide binding                             | 3.299  | 5.31   | 1.61 |
| P14693 | sorting assembly machinery 35 kDa subunit [OS=Saccharomyces cerevisiae S288c]                                                                | 856483 | SAM35; YHR083 W      | cell organization and biogenesis;transport                                                    | membrane;mitochondrion                                   | protein binding                                                   | 0.334  | 0.54   | 1.62 |
| P22353 | 54S ribosomal protein L8, mitochondrial [OS=Saccharomyces cerevisiae S288c]                                                                  | 853382 | MRPL8; YJL063C       | cell organization and biogenesis;metabolic process                                            | mitochondrion;ribosome                                   | structural molecule activity                                      | 0.359  | 0.585  | 1.63 |
| P34222 | Peptidyl-tRNA hydrolase 2 [OS=Saccharomyces cerevisiae S288c]                                                                                | 852223 | PTH2; YBL057C        | regulation of biological process                                                              | cytoplasm;cytosol;membrane;mitochondrion                 | catalytic activity;protein binding                                | 0.425  | 0.701  | 1.65 |
| P20967 | 2-oxoglutarate dehydrogenase, mitochondrial [OS=Saccharomyces cerevisiae S288c]                                                              | 854681 | KGD1; YIL125W        | metabolic process                                                                             | cytosol;mitochondrion;organelle lumen                    | catalytic activity                                                | 13.785 | 22.843 | 1.66 |

|        |                                                                                                                         |         |                   |                                                                                                                                       |                                                                |                                                            |         |         |      |
|--------|-------------------------------------------------------------------------------------------------------------------------|---------|-------------------|---------------------------------------------------------------------------------------------------------------------------------------|----------------------------------------------------------------|------------------------------------------------------------|---------|---------|------|
| P04840 | Mitochondrial outer membrane protein porin 1 [OS=Saccharomyces cerevisiae S288c]                                        | 855669  | POR1; YNL055C     | cell death;cell organization and biogenesis;cellular homeostasis;regulation of biological process;transport                           | cytoplasm;membrane;mitochondrion                               | transporter activity                                       | 15.238  | 25.367  | 1.66 |
| P07251 | ATP synthase subunit alpha, mitochondrial [OS=Saccharomyces cerevisiae S288c]                                           | 852177  | ATP1; YBL099 W    | metabolic process;transport                                                                                                           | cytosol;membrane;mitochondrion                                 | catalytic activity;nucleotide binding;transporter activity | 34.938  | 58.948  | 1.69 |
| P16603 | NADPH-cytochrome P450 reductase [OS=Saccharomyces cerevisiae S288c]                                                     | 856438  | NCP1; YHR042 W    | metabolic process                                                                                                                     | cytoplasm;cytosol;endoplasmic reticulum;membrane;mitochondrion | catalytic activity;metal ion binding;nucleotide binding    | 0.194   | 0.343   | 1.77 |
| P38169 | Kynurenine 3-monooxygenase [OS=Saccharomyces cerevisiae S288c]                                                          | 852179  | BNA4; YBL098 W    | metabolic process                                                                                                                     | membrane;mitochondrion                                         | catalytic activity;nucleotide binding                      | 0.269   | 0.487   | 1.81 |
| P00890 | citrate synthase, mitochondrial [OS=Saccharomyces cerevisiae S288c]                                                     | 855732  | CIT1; YNR001C     | metabolic process;transport                                                                                                           | cytosol;mitochondrion;organelle lumen                          | catalytic activity                                         | 11.798  | 21.758  | 1.84 |
| P38626 | NADH-cytochrome b5 reductase 1 [OS=Saccharomyces cerevisiae S288c]                                                      | 854768  | CBR1; YIL043C     | metabolic process                                                                                                                     | endoplasmic reticulum;membrane;mitochondrion;nucleus           | catalytic activity                                         | 0.334   | 0.616   | 1.84 |
| P00924 | Enolase 1 [OS=Saccharomyces cerevisiae S288c]                                                                           | 853169  | ENO1; YGR254 W    | metabolic process;regulation of biological process                                                                                    | cytoplasm;cytosol;membrane;mitochondrion;vacuole               | catalytic activity;metal ion binding;protein binding       | 0.711   | 1.326   | 1.86 |
| P53206 | putative cysteine synthase [OS=Saccharomyces cerevisiae S288c]                                                          | 852895  | MCY1              | metabolic process                                                                                                                     |                                                                | catalytic activity                                         | 0.817   | 1.555   | 1.90 |
| Q07651 | SUR7 family protein FMP45 [OS=Saccharomyces cerevisiae S288c]                                                           | 851304  | FMP45; YLD222C    | cell differentiation;cell organization and biogenesis                                                                                 | membrane;mitochondrion                                         |                                                            | 3.125   | 6.017   | 1.93 |
| Q12466 | tricalbin-1 [OS=Saccharomyces cerevisiae S288c]                                                                         | 854253  | TCB1; YOR086C     | cell organization and biogenesis;regulation of biological process                                                                     | endoplasmic reticulum;membrane;mitochondrion                   | metal ion binding;protein binding                          | 0.191   | 0.369   | 1.93 |
| P32939 | GTP-binding protein ypt7 [OS=Saccharomyces cerevisiae S288c]                                                            | 855012  | YPT7; YML001 W    | cell communication;cell organization and biogenesis;metabolic process;regulation of biological process;response to stimulus;transport | cytosol;endosome;membrane;mitochondrion;vacuole                | catalytic activity;nucleotide binding;protein binding      | 0.585   | 1.154   | 1.97 |
| P35180 | mitochondrial import receptor subunit Tom20 [OS=Saccharomyces cerevisiae S288c]                                         | 852973  | TOM20; YGR082 W   | cell organization and biogenesis;transport                                                                                            | membrane;mitochondrion                                         | protein binding;transporter activity                       | 0.701   | 1.424   | 2.03 |
| Q02863 | ubiquitin carboxyl-terminal hydrolase 16 [OS=Saccharomyces cerevisiae S288c]                                            | 856032  | UBP16; YPL072 W   | metabolic process                                                                                                                     | membrane;mitochondrion                                         | catalytic activity                                         | 0.072   | 0.15    | 2.08 |
| P38909 | cytochrome c mitochondrial import factor CYC2 [OS=Saccharomyces cerevisiae S288c]                                       | 854202  | CYC2; YOR037 W    | cell organization and biogenesis;metabolic process                                                                                    | membrane;mitochondrion                                         | catalytic activity                                         | 0.093   | 0.194   | 2.09 |
| P21306 | ATP synthase subunit epsilon, mitochondrial [OS=Saccharomyces cerevisiae S288c]                                         | 855857  | ATP15; YPL271 W   | metabolic process;transport                                                                                                           | membrane;mitochondrion                                         | catalytic activity;transporter activity                    | 2.162   | 4.623   | 2.14 |
| P05626 | ATP synthase subunit 4, mitochondrial [OS=Saccharomyces cerevisiae S288c]                                               | 856027  | ATP4; YPL078C     | cell organization and biogenesis;metabolic process;transport                                                                          | membrane;mitochondrion                                         | catalytic activity;transporter activity                    | 3.642   | 7.799   | 2.14 |
| Q04472 | Mitochondrial inner membrane F <sub>1</sub> -AAA protease supercomplex subunit MGR3 [OS=Saccharomyces cerevisiae S288c] | 855142  | MGR3; YMR115 W    | metabolic process                                                                                                                     | membrane;mitochondrion                                         | protein binding                                            | 0.15    | 0.322   | 2.15 |
| Q01574 | acetyl-coenzyme A synthetase 1 [OS=Saccharomyces cerevisiae S288c]                                                      | 851245  | ACS1; YAL054C     | cell organization and biogenesis;metabolic process                                                                                    | cytoplasm;cytosol;endoplasmic reticulum;mitochondrion;nucleus  | catalytic activity;nucleotide binding                      | 0.624   | 1.482   | 2.38 |
| P40515 | Mitochondria fission 1 protein [OS=Saccharomyces cerevisiae S288c]                                                      | 854745  | FIS1; YIL065C     | cell death;cell organization and biogenesis;regulation of biological process                                                          | membrane;mitochondrion                                         | protein binding                                            | 0.468   | 1.154   | 2.47 |
| P00358 | glyceraldehyde-3-phosphate dehydrogenase 2 [OS=Saccharomyces cerevisiae S288c]                                          | 853465  | TDH2; YJR009C     | cell death;metabolic process                                                                                                          | cytoplasm;cytosol;membrane;mitochondrion;nucleus               | catalytic activity;nucleotide binding;protein binding      | 1.721   | 4.484   | 2.61 |
| P04806 | Hexokinase-1 [OS=Saccharomyces cerevisiae S288c]                                                                        | 850614  | HXK1; YFR053C     | cellular homeostasis;metabolic process;transport                                                                                      | cytoplasm;cytosol;mitochondrion                                | catalytic activity;nucleotide binding                      | 0.269   | 0.743   | 2.76 |
| P16547 | Mitochondrial outer membrane protein OM45 [OS=Saccharomyces cerevisiae S288c]                                           | 854670  | OM45; YIL136W     |                                                                                                                                       | membrane;mitochondrion                                         |                                                            | 274.423 | 830.764 | 3.03 |
| Q2V2P9 | Uncharacterized protein YDR119W-A [OS=Saccharomyces cerevisiae S288c]                                                   | 3799970 | COX26; YDR119 W-A |                                                                                                                                       | membrane;mitochondrion                                         |                                                            | 1.154   | 3.642   | 3.16 |
| P39722 | Mitochondrial Rho GTPase 1 [OS=Saccharomyces cerevisiae S288c]                                                          | 851249  | GEM1; YAL048C     | cell organization and biogenesis;regulation of biological process;response                                                            | membrane;mitochondrion                                         | catalytic activity;metal ion binding;nucleotide            | 0.059   | 0.189   | 3.20 |

|        |                                                                                                  |        |                        |                                                                                                                    |                                              |                                                                   |        |        |       |
|--------|--------------------------------------------------------------------------------------------------|--------|------------------------|--------------------------------------------------------------------------------------------------------------------|----------------------------------------------|-------------------------------------------------------------------|--------|--------|-------|
|        |                                                                                                  |        |                        | to stimulus;transport                                                                                              |                                              | binding                                                           |        |        |       |
| P53925 | Uncharacterized vacuolar membrane protein YNL115C [OS=Saccharomyces cerevisiae S288c]            | 855608 | YNL115C ; YNL115C      |                                                                                                                    | membrane;vacuole                             |                                                                   | 0.072  | 0.233  | 3.24  |
| P34231 | Uncharacterized protein YKL187C [OS=Saccharomyces cerevisiae S288c]                              | 853648 | FAT3; YKL187C; YKL187C | cell organization and biogenesis;transport                                                                         | membrane;mitochondrion                       |                                                                   | 0.093  | 0.304  | 3.27  |
| P28737 | Protein MSP1 [OS=Saccharomyces cerevisiae S288c]                                                 | 852915 | MSP1; YGR028 W         | cell organization and biogenesis;metabolic process;regulation of biological process;response to stimulus;transport | membrane;mitochondrion;nucleus               | catalytic activity;nucleotide binding;protein binding;RNA binding | 0.122  | 0.413  | 3.39  |
| P25087 | Sterol 24-C-methyltransferase [OS=Saccharomyces cerevisiae S288c]                                | 855003 | ERG6; YML008C          | metabolic process                                                                                                  | endoplasmic reticulum;membrane;mitochondrion | catalytic activity                                                | 0.557  | 1.894  | 3.40  |
| P00331 | Alcohol dehydrogenase 2 [OS=Saccharomyces cerevisiae S288c]                                      | 855349 | ADH2; YMR303 C         | metabolic process                                                                                                  | cytoplasm                                    | catalytic activity;metal ion binding                              | 2.594  | 9      | 3.47  |
| Q06405 | ATP synthase subunit f, mitochondrial [OS=Saccharomyces cerevisiae S288c]                        | 851983 | ATP17; YDR377 W        | metabolic process;transport                                                                                        | membrane;mitochondrion                       | catalytic activity;transporter activity                           | 1.512  | 5.31   | 3.51  |
| P30902 | ATP synthase subunit d, mitochondrial [OS=Saccharomyces cerevisiae S288c]                        | 853853 | ATP7; YKL016C          | metabolic process;transport                                                                                        | membrane;mitochondrion                       | catalytic activity;transporter activity                           | 5.105  | 18.307 | 3.59  |
| P00942 | Triosephosphate isomerase [OS=Saccharomyces cerevisiae S288c]                                    | 851620 | TPH1; YDR050C          | metabolic process                                                                                                  | cytoplasm;cytosol;membrane;mitochondrion     | catalytic activity                                                | 0.194  | 0.701  | 3.61  |
| P00360 | glyceraldehyde-3-phosphate dehydrogenase 1 [OS=Saccharomyces cerevisiae S288c]                   | 853395 | TDH1; YJL052W          | metabolic process                                                                                                  | cytoplasm;cytosol;membrane;mitochondrion     | catalytic activity;nucleotide binding                             | 0.823  | 3.062  | 3.72  |
| P34251 | Uncharacterized oxidoreductase YKL107W [OS=Saccharomyces cerevisiae S288c]                       | 853753 | YKL107 W; YKL107 W     | metabolic process                                                                                                  | membrane                                     | catalytic activity                                                | 0.274  | 1.069  | 3.90  |
| P54115 | Magnesium-activated aldehyde dehydrogenase, cytosolic [OS=Saccharomyces cerevisiae S288c]        | 856044 | ALD6; YPL061 W         | metabolic process;response to stimulus                                                                             | cytoplasm;cytosol;mitochondrion              | catalytic activity                                                | 0.077  | 0.346  | 4.49  |
| P14540 | fructose-bisphosphate aldolase [OS=Saccharomyces cerevisiae S288c]                               | 853805 | FBA1; YKL060C          | metabolic process                                                                                                  | cytoplasm;cytosol;membrane;mitochondrion     | catalytic activity;metal ion binding                              | 0.292  | 1.448  | 4.96  |
| Q03640 | Tricalbin-3 [OS=Saccharomyces cerevisiae S288c]                                                  | 854903 | TCB3; YML072C          | cell organization and biogenesis;regulation of biological process                                                  | endoplasmic reticulum;membrane;mitochondrion | metal ion binding;protein binding                                 | 0.032  | 0.168  | 5.25  |
| Q12230 | Sphingolipid long chain base-responsive protein LSP1 [OS=Saccharomyces cerevisiae S288c]         | 856103 | LSP1; YPL004C          | regulation of biological process;response to stimulus;transport                                                    | cytoplasm;membrane;mitochondrion             |                                                                   | 14.849 | 84.77  | 5.71  |
| P28240 | isocitrate lyase [OS=Saccharomyces cerevisiae S288c]                                             | 856794 | ICL1; YER065C          | metabolic process                                                                                                  | cytoplasm;extracellular;vacuole              | catalytic activity;metal ion binding                              | 0.077  | 0.45   | 5.84  |
| Q06089 | Uncharacterized mitochondrial outer membrane protein YPR098C [OS=Saccharomyces cerevisiae S288c] | 856213 | YPR098C ; YPR098C      |                                                                                                                    | membrane;mitochondrion                       |                                                                   | 0.778  | 4.623  | 5.94  |
| Q02981 | ABC1 family protein YPL109C, mitochondrial [OS=Saccharomyces cerevisiae S288c]                   | 855995 | YPL109C; YPL109C       |                                                                                                                    | mitochondrion                                |                                                                   | 0.059  | 0.413  | 7.00  |
| P10963 | phosphoenolpyruvate carboxykinase [ATP] [OS=Saccharomyces cerevisiae S288c]                      | 853972 | PCK1; YKR097 W         | metabolic process                                                                                                  | cytosol                                      | catalytic activity;nucleotide binding;protein binding             | 0.166  | 1.326  | 7.99  |
| P38825 | Protein TOM71 [OS=Saccharomyces cerevisiae S288c]                                                | 856517 | TOM71; YHR117 W        | transport                                                                                                          | membrane;mitochondrion                       | protein binding;transporter activity                              | 0.061  | 0.805  | 13.20 |
| P39518 | Long-chain-fatty-acid--CoA ligase 2 [OS=Saccharomyces cerevisiae S288c]                          | 856734 | FAA2; YER015 W         | metabolic process;transport                                                                                        | cytoplasm;mitochondrion                      | catalytic activity;nucleotide binding                             | 0.055  | 0.802  | 14.58 |

**Supplemental Table S5. The relative concentrations of proteins in mitochondria purified from WT or *ups1Δ* cells cultured without LCA.** Mitochondria were purified from WT or *ups1Δ* cells recovered on day 4 of cell culturing without LCA. Mass spectrometry-based identification and quantitation of proteins recovered in purified mitochondria were performed as described in Materials and methods. The exponentially modified protein abundance index (emPAI) provided by the "Proteome Discoverer" software was used to calculate the relative abundance of mitochondrial proteins between specified datasets. Data on the relative concentrations of mitochondrial proteins are presented as means of 2 independent experiments.

| Accession | Description                                                                                                | Entre<br>z<br>Gene<br>ID | Gene<br>ID             | Biological Process                                                                                     | Cellular Component                      | Molecular<br>Function                                                | emP<br>AI<br>WT | emP<br>AI<br><i>ups1</i> | Rati<br>o<br><i>ups1</i><br>/<br>WT |
|-----------|------------------------------------------------------------------------------------------------------------|--------------------------|------------------------|--------------------------------------------------------------------------------------------------------|-----------------------------------------|----------------------------------------------------------------------|-----------------|--------------------------|-------------------------------------|
| Q12165    | ATP synthase subunit delta, mitochondrial                                                                  | 851560                   | ATP16                  | metabolic process; transport                                                                           | membrane; mitochondrion                 | catalytic activity; transporter activity                             | 4.623           | 0.334                    | 0.07                                |
| P37267    | Assembly factor cbp4 [OS=Saccharomyces cerevisiae S288c]                                                   |                          | CBP4                   | cell organization and biogenesis                                                                       | membrane;mitochondrion                  |                                                                      | 7.111           | 0.52                     | 0.07                                |
| P81449    | ATP synthase subunit e, mitochondrial [OS=Saccharomyces cerevisiae S288c]                                  | 851922                   | TIM11; YDR322C-A       | cell organization and biogenesis;metabolic process;transport                                           | membrane;mitochondrion                  | catalytic activity;structural molecule activity;transporter activity | 9               | 0.778                    | 0.09                                |
| P19955    | 37S ribosomal protein YMR-31, mitochondrial [OS=Saccharomyces cerevisiae S288c]                            | 850610                   | YMR31; YFR049W         | cell organization and biogenesis;metabolic process                                                     | mitochondrion;ribosome                  | catalytic activity;protein binding;structural molecule activity      | 26.826          | 2.594                    | 0.10                                |
| P00128    | Cytochrome b-c1 complex subunit 7 [OS=Saccharomyces cerevisiae S288c]                                      | 852142                   | QCR7; YDR529C          | cell organization and biogenesis;metabolic process;transport                                           | membrane;mitochondrion                  | catalytic activity;transporter activity                              | 34.938          | 3.642                    | 0.10                                |
| P53170    | [Pyruvate dehydrogenase (acetyl-transferring)] kinase 2, mitochondrial [OS=Saccharomyces cerevisiae S288c] | 852821                   | PKP2; YGL059W          | metabolic process;regulation of biological process                                                     | mitochondrion;organelle lumen           | catalytic activity;nucleotide binding;protein binding                | 0.778           | 0.086                    | 0.11                                |
| P32799    | Cytochrome c oxidase subunit 6A, mitochondrial [OS=Saccharomyces cerevisiae S288c]                         | 852684                   | COX13; YGL191W         | cell organization and biogenesis;metabolic process;regulation of biological process;transport          | membrane;mitochondrion                  | catalytic activity;enzyme regulator activity;transporter activity    | 18.953          | 2.162                    | 0.11                                |
| P36141    | Putative redox protein fmp46, mitochondrial [OS=Saccharomyces cerevisiae S288c]                            | 853923                   | FMP46; YKR049C         | metabolic process                                                                                      | mitochondrion                           | catalytic activity;protein binding                                   | 4.337           | 0.52                     | 0.12                                |
| P53219    | Abhydrolase domain-containing protein IMO32 [OS=Saccharomyces cerevisiae S288c]                            | 852919                   | IMO32; YGR031W         | metabolic process;transport                                                                            | mitochondrion                           | catalytic activity                                                   | 0.931           | 0.116                    | 0.12                                |
| P47140    | Altered inheritance rate of mitochondria protein 25 [OS=Saccharomyces cerevisiae S288c]                    | 853563                   | AIM25; YJR100C         | cell organization and biogenesis                                                                       | membrane;mitochondrion                  | transporter activity                                                 | 0.874           | 0.11                     | 0.13                                |
| P17695    | Glutaredoxin-2, mitochondrial [OS=Saccharomyces cerevisiae S288c]                                          | 852124                   | GRX2; YDR513W          | cellular homeostasis;metabolic process;regulation of biological process;response to stimulus;transport | cytoplasm;cytosol;mitochondrion;nucleus | antioxidant activity;catalytic activity                              | 1.848           | 0.233                    | 0.13                                |
| Q04472    | Mitochondrial inner membrane i-AAA protease supercomplex subunit MGR3 [OS=Saccharomyces cerevisiae S288c]  | 855142                   | MGR3; YMR115W          | metabolic process                                                                                      | membrane;mitochondrion                  | protein binding                                                      | 0.52            | 0.072                    | 0.14                                |
| Q96VH5    | MICOS complex subunit Mic10 [OS=Saccharomyces cerevisiae S288c]                                            | 850300                   | MOS1; MIC10; YCL057C-A | cell organization and biogenesis                                                                       | membrane;mitochondrion                  |                                                                      | 6.197           | 0.931                    | 0.15                                |
| P53736    | Uncharacterized protein YNR040W [OS=Saccharomyces cerevisiae S288c]                                        | 855776                   | YNR040W; YNR040W       |                                                                                                        | mitochondrion                           |                                                                      | 0.73            | 0.116                    | 0.16                                |
| P00427    | Cytochrome c oxidase subunit 6, mitochondrial [OS=Saccharomyces cerevisiae S288c]                          | 856448                   | COX6; YHR051W          | metabolic process;transport                                                                            | membrane;mitochondrion                  | catalytic activity;metal ion binding;transporter activity            | 7.254           | 1.154                    | 0.16                                |
| P02381    | Ribosomal protein VAR1, mitochondrial [OS=Saccharomyces cerevisiae S288c]                                  | 854586                   | VAR1; Q0140            | cell organization and biogenesis;metabolic process                                                     | mitochondrion;ribosome                  | structural molecule activity                                         | 0.688           | 0.11                     | 0.16                                |
| P53723    | UPF0674 endoplasmic reticulum membrane protein YNR021W [OS=Saccharomyces cerevisiae S288c]                 | 855755                   | YNR021W; YNR021W       |                                                                                                        | endoplasmic reticulum;membrane          | metal ion binding                                                    | 0.65            | 0.105                    | 0.16                                |
| P38341    | MICOS complex subunit MIC12 [OS=Saccharomyces cerevisiae S288c]                                            | 852566                   | AIM5; MIC12; YBR262C   | cell organization and biogenesis                                                                       | membrane;mitochondrion                  |                                                                      | 1.783           | 0.292                    | 0.16                                |



|        |                                                                                                   |            |                             |                                                                                                        |                                       |                                                             |            |       |      |
|--------|---------------------------------------------------------------------------------------------------|------------|-----------------------------|--------------------------------------------------------------------------------------------------------|---------------------------------------|-------------------------------------------------------------|------------|-------|------|
| Q12032 | Altered inheritance of mitochondria protein 41, mitochondrial [OS=Saccharomyces cerevisiae S288c] | 8543<br>90 | AIM41;<br>YOR21<br>5C       |                                                                                                        | mitochondrion                         | catalytic activity                                          | 2.831      | 0.468 | 0.17 |
| P00045 | Cytochrome c iso-2 [OS=Saccharomyces cerevisiae S288c]                                            | 8566<br>72 | CYC7;<br>YEL039<br>C        | metabolic process;transport                                                                            | mitochondrion                         | metal ion binding                                           | 1.512      | 0.259 | 0.17 |
| P00447 | Superoxide dismutase [Mn], mitochondrial [OS=Saccharomyces cerevisiae S288c]                      | 8563<br>99 | SOD2;<br>YHR00<br>8C        | metabolic process;response to stimulus                                                                 | mitochondrion;organelle lumen         | antioxidant activity;catalytic activity;metal ion binding   | 6.017      | 1.031 | 0.17 |
| P40452 | Cytochrome c oxidase assembly factor 1 [OS=Saccharomyces cerevisiae S288c]                        | 8546<br>49 | COA1;<br>YIL157<br>C        | cell organization and biogenesis                                                                       | membrane;mitochondrion                | protein binding                                             | 1.31       | 0.233 | 0.18 |
| P23369 | 54S ribosomal protein L25, mitochondrial [OS=Saccharomyces cerevisiae S288c]                      | 8529<br>67 | MRPL2<br>5;<br>YGR07<br>6C  | cell organization and biogenesis;metabolic process                                                     | mitochondrion;ribosome                | structural molecule activity                                | 1.31       | 0.233 | 0.18 |
| P32266 | Dynamkin-like GTPase MGM1, mitochondrial [OS=Saccharomyces cerevisiae S288c]                      | 8543<br>86 | MGM1;<br>YOR21<br>1C        | cell organization and biogenesis                                                                       | membrane;mitochondrion                | catalytic activity;nucleotide binding;protein binding       | 0.448      | 0.086 | 0.19 |
| P22353 | 54S ribosomal protein L8, mitochondrial [OS=Saccharomyces cerevisiae S288c]                       | 8533<br>82 | MRPL8;<br>YIL063<br>C       | cell organization and biogenesis;metabolic process                                                     | mitochondrion;ribosome                | structural molecule activity                                | 0.848      | 0.166 | 0.20 |
| P08525 | Cytochrome b-c1 complex subunit 8 [OS=Saccharomyces cerevisiae S288c]                             | 8532<br>73 | QCR8;<br>YJL166<br>W        | metabolic process;transport                                                                            | membrane;mitochondrion                | catalytic activity;transporter activity                     | 2.981      | 0.585 | 0.20 |
| P23833 | Protein SCO1, mitochondrial [OS=Saccharomyces cerevisiae S288c]                                   | 8523<br>25 | SCO1;<br>YBR037<br>C        | cell organization and biogenesis;cellular homeostasis;response to stimulus;transport                   | membrane;mitochondrion                | antioxidant activity;catalytic activity;metal ion binding   | 1.448      | 0.292 | 0.20 |
| P40086 | Cytochrome c oxidase assembly protein cox15 [OS=Saccharomyces cerevisiae S288c]                   | 8568<br>84 | COX15;<br>YER141<br>W       | cell organization and biogenesis;metabolic process;transport                                           | membrane;mitochondrion                | catalytic activity;transporter activity                     | 2.594      | 0.532 | 0.21 |
| P25372 | Thioredoxin-3, mitochondrial [OS=Saccharomyces cerevisiae S288c]                                  | 8504<br>44 | TRX3;<br>YCR083<br>W        | cellular homeostasis;metabolic process;regulation of biological process;response to stimulus;transport | cytoplasm;mitochondrion               | catalytic activity                                          | 2.511      | 0.52  | 0.21 |
| P28239 | Inorganic pyrophosphatase, mitochondrial [OS=Saccharomyces cerevisiae S288c]                      | 8553<br>09 | PPA2;<br>YMR26<br>7W        | metabolic process                                                                                      | cytoplasm;mitochondrion               | catalytic activity;metal ion binding                        | 0.585      | 0.122 | 0.21 |
| P18496 | Mitochondrial ATPase complex subunit ATP10 [OS=Saccharomyces cerevisiae S288c]                    | 8511<br>09 | ATP10;<br>YLR393<br>W       | cell organization and biogenesis                                                                       | cytoplasm;membrane;mitochondrion      | protein binding                                             | 1.239      | 0.259 | 0.21 |
| P36528 | 54S ribosomal protein L17, mitochondrial [OS=Saccharomyces cerevisiae S288c]                      | 8554<br>69 | MRPL1<br>7;<br>YNL252<br>C  | cell organization and biogenesis;metabolic process                                                     | mitochondrion;ribosome                | structural molecule activity                                | 0.52       | 0.11  | 0.21 |
| P47039 | Probable kynurenine--oxoglutarate transaminase BNA3 [OS=Saccharomyces cerevisiae S288c]           | 8533<br>86 | BNA3;<br>YJL060<br>W        | metabolic process;regulation of biological process                                                     | cytoplasm;mitochondrion               | catalytic activity                                          | 0.468      | 0.101 | 0.22 |
| P40165 | NAD(P)H-hydrate epimerase [OS=Saccharomyces cerevisiae S288c]                                     | 8555<br>21 | NNR1;<br>YNL200<br>C        | metabolic process                                                                                      | cytoplasm;mitochondrion               | catalytic activity;metal ion binding;nucleotide binding     | 2.162      | 0.468 | 0.22 |
| P53305 | Mitochondrial 37S ribosomal protein S27 [OS=Saccharomyces cerevisiae S288c]                       | 8531<br>29 | RSM27<br>;<br>YGR21<br>5W   | cell organization and biogenesis;metabolic process                                                     | mitochondrion;ribosome                | structural molecule activity                                | 2.162      | 0.468 | 0.22 |
| P02992 | elongation factor Tu, mitochondrial [OS=Saccharomyces cerevisiae S288c]                           | 8543<br>59 | TUF1;<br>YOR18<br>7W        | cell organization and biogenesis;metabolic process                                                     | mitochondrion                         | catalytic activity;nucleotide binding;RNA binding           | 30.62<br>3 | 6.667 | 0.22 |
| P11325 | Leucine--tRNA ligase, mitochondrial [OS=Saccharomyces cerevisiae S288c]                           | 8510<br>98 | NAM2;<br>YLR382<br>C        | cell organization and biogenesis;metabolic process;regulation of biological process                    | cytosol;mitochondrion;organelle lumen | catalytic activity;nucleotide binding;RNA binding           | 0.353      | 0.078 | 0.22 |
| P25039 | Elongation factor G, mitochondrial [OS=Saccharomyces cerevisiae S288c]                            | 8507<br>58 | MEF1;<br>YLR069<br>C        | cell organization and biogenesis;metabolic process                                                     | cytosol;mitochondrion                 | catalytic activity;nucleotide binding;RNA binding           | 0.931      | 0.207 | 0.22 |
| P40098 | uncharacterized mitochondrial membrane protein FMP10 [OS=Saccharomyces cerevisiae S288c]          | 8569<br>31 | FMP10;<br>YER182<br>W       |                                                                                                        | membrane;mitochondrion                |                                                             | 5.952      | 1.336 | 0.22 |
| P36066 | Protein MRG3-like [OS=Saccharomyces cerevisiae S288c]                                             | 8537<br>25 | YKL133<br>C;<br>YKL133<br>C | metabolic process                                                                                      | membrane;mitochondrion                | protein binding                                             | 1.054      | 0.241 | 0.23 |
| P12687 | 54S ribosomal protein L2, mitochondrial [OS=Saccharomyces cerevisiae S288c]                       | 8557<br>27 | MRP7;<br>YNL005<br>C        | cell organization and biogenesis;metabolic process                                                     | mitochondrion;ribosome                | catalytic activity;RNA binding;structural molecule activity | 1.565      | 0.369 | 0.24 |
| P39525 | 3-oxoacyl-[acyl-carrier-protein] synthase homolog [OS=Saccharomyces cerevisiae S288c]             | 8567<br>90 | CEM1;<br>YER061<br>C        | metabolic process                                                                                      | mitochondrion                         | catalytic activity                                          | 2.899      | 0.688 | 0.24 |

|        |                                                                                                   |            |                                           |                                                                         |                                                 |                                                       |             |             |      |
|--------|---------------------------------------------------------------------------------------------------|------------|-------------------------------------------|-------------------------------------------------------------------------|-------------------------------------------------|-------------------------------------------------------|-------------|-------------|------|
| Q05892 | MIOREX complex component 2 [OS=Saccharomyces cerevisiae S288c]                                    | 8509<br>97 | YLR290<br>C;<br>COQ11<br>;<br>YLR290<br>C | metabolic process                                                       | mitochondrion                                   | catalytic activity                                    | 3.217       | 0.778       | 0.24 |
| P46998 | mitochondrial membrane protein FMP33 [OS=Saccharomyces cerevisiae S288c]                          | 8532<br>79 | FMP33;<br>YJL161<br>W                     |                                                                         | membrane;mitochondrion                          |                                                       | 1.371       | 0.334       | 0.24 |
| P50088 | Stationary phase gene 1 protein [OS=Saccharomyces cerevisiae S288c]                               | 8531<br>51 | SPG1;<br>YGR23<br>6C                      |                                                                         | endoplasmic reticulum;membrane;mitochondrion    |                                                       | 629.9<br>57 | 157.4<br>89 | 0.25 |
| P48569 | Uncharacterized protein YDL183C [OS=Saccharomyces cerevisiae S288c]                               | 8513<br>45 | YDL183<br>C;<br>YDL183<br>C               | transport                                                               |                                                 |                                                       | 1.069       | 0.274       | 0.26 |
| P19516 | Cytochrome c oxidase assembly protein COX11, mitochondrial [OS=Saccharomyces cerevisiae S288c]    | 8559<br>71 | COX11;<br>YPL132<br>W                     | cell organization and biogenesis;metabolic process                      | membrane;mitochondrion;ribosome                 | metal ion binding                                     | 1.069       | 0.274       | 0.26 |
| P38885 | Altered inheritance of mitochondria protein 46, mitochondrial [OS=Saccharomyces cerevisiae S288c] | 8566<br>06 | AIM46;<br>YHR19<br>9C                     |                                                                         | mitochondrion                                   | catalytic activity                                    | 2.728       | 0.73        | 0.27 |
| P38175 | 37S ribosomal protein MRP21, mitochondrial [OS=Saccharomyces cerevisiae S288c]                    | 8521<br>88 | MRP21<br>;<br>YBL090<br>W                 | cell organization and biogenesis;metabolic process                      | mitochondrion;ribosome                          | structural molecule activity                          | 0.701       | 0.194       | 0.28 |
| P53230 | Phosphatidate cytidyltransferase, mitochondrial [OS=Saccharomyces cerevisiae S288c]               | 8529<br>37 | TAM41<br>;<br>YGR04<br>6W                 | metabolic process                                                       | membrane;mitochondrion;organelle lumen          | catalytic activity                                    | 0.668       | 0.186       | 0.28 |
| P14693 | sorting assembly machinery 35 kDa subunit [OS=Saccharomyces cerevisiae S288c]                     | 8564<br>83 | SAM35<br>;<br>YHR08<br>3W                 | cell organization and biogenesis;transport                              | membrane;mitochondrion                          | protein binding                                       | 0.54        | 0.155       | 0.29 |
| P48527 | Tyrosine-tRNA ligase, mitochondrial [OS=Saccharomyces cerevisiae S288c]                           | 8560<br>07 | MSY1;<br>YPL097<br>W                      | metabolic process                                                       | cytoplasm;cytosol;mitochondrion;organelle lumen | catalytic activity;nucleotide binding;RNA binding     | 0.52        | 0.15        | 0.29 |
| P25605 | Acetolactate synthase small subunit, mitochondrial [OS=Saccharomyces cerevisiae S288c]            | 8503<br>48 | ILV6;<br>YCL009<br>C                      | metabolic process;regulation of biological process                      | mitochondrion                                   | catalytic activity;enzyme regulator activity          | 6.848       | 1.976       | 0.29 |
| P38323 | ATP-dependent clpX-like chaperone, mitochondrial [OS=Saccharomyces cerevisiae S288c]              | 8525<br>28 | MCX1;<br>YBR227<br>C                      | metabolic process                                                       | membrane;mitochondrion;organelle lumen          | catalytic activity;nucleotide binding                 | 0.501       | 0.145       | 0.29 |
| P53081 | NGG1-interacting factor 3 [OS=Saccharomyces cerevisiae S288c]                                     | 8526<br>51 | NIF3;<br>YGL221<br>C                      |                                                                         | cytoplasm;mitochondrion                         |                                                       | 0.501       | 0.145       | 0.29 |
| P32332 | Mitochondrial oxaloacetate transport protein [OS=Saccharomyces cerevisiae S288c]                  | 8537<br>39 | OAC1;<br>YKL120<br>W                      | metabolic process;transport                                             | membrane;mitochondrion                          | structural molecule activity;transporter activity     | 4.995       | 1.448       | 0.29 |
| P53311 | Mitochondrial pyruvate carrier 3 [OS=Saccharomyces cerevisiae S288c]                              | 8531<br>58 | FMP43;<br>MPC3;<br>YGR24<br>3W            | transport                                                               | membrane;mitochondrion                          | transporter activity                                  | 1.61        | 0.468       | 0.29 |
| Q07500 | External NADH-ubiquinone oxidoreductase 2, mitochondrial [OS=Saccharomyces cerevisiae S288c]      | 8514<br>74 | NDE2;<br>YDL085<br>W                      | metabolic process                                                       | mitochondrion                                   | catalytic activity;nucleotide binding                 | 13.67<br>8  | 4.012       | 0.29 |
| P38122 | 3-methyl-2-oxobutanoate hydroxymethyltransferase [OS=Saccharomyces cerevisiae S288c]              | 8524<br>74 | ECM31<br>;<br>YBR176<br>W                 | metabolic process                                                       | mitochondrion                                   | catalytic activity                                    | 0.413       | 0.122       | 0.30 |
| P54857 | lipase 2 [OS=Saccharomyces cerevisiae S288c]                                                      | 8516<br>28 | TGL2;<br>YDR05<br>8C                      | metabolic process;transport                                             | mitochondrion                                   | catalytic activity                                    | 0.369       | 0.11        | 0.30 |
| Q01217 | Protein ARG5,6, mitochondrial [OS=Saccharomyces cerevisiae S288c]                                 | 8568<br>00 | ARG5,6<br>;<br>YER069<br>W                | metabolic process;regulation of biological process                      | cytoplasm;mitochondrion;organelle lumen         | catalytic activity;nucleotide binding;protein binding | 0.286       | 0.087       | 0.30 |
| Q03246 | 37S ribosomal protein S17, mitochondrial [OS=Saccharomyces cerevisiae S288c]                      | 8552<br>26 | MRPS1<br>7;<br>YMR18<br>8C                | cell differentiation;cell organization and biogenesis;metabolic process | mitochondrion;ribosome                          | RNA binding;structural molecule activity              | 1.276       | 0.389       | 0.30 |
| P22354 | 54S ribosomal protein L20, mitochondrial [OS=Saccharomyces cerevisiae S288c]                      | 8539<br>60 | MRPL2<br>0;<br>YKR085<br>C                | cell organization and biogenesis;metabolic process                      | mitochondrion;ribosome                          | structural molecule activity                          | 1.276       | 0.389       | 0.30 |
| P38969 | Pentamidine resistance factor, mitochondrial [OS=Saccharomyces cerevisiae S288c]                  | 8544<br>40 | PNT1;<br>YOR26<br>6W                      | cell organization and biogenesis;response to stimulus                   | membrane;mitochondrion                          |                                                       | 0.848       | 0.259       | 0.31 |
| P15424 | ATP-dependent RNA helicase MSS116, mitochondrial [OS=Saccharomyces cerevisiae S288c]              | 8517<br>75 | MSS11<br>6;<br>YDR19<br>4C                | metabolic process;regulation of biological process                      | mitochondrion;organelle lumen                   | catalytic activity;nucleotide binding;RNA binding     | 1.644       | 0.506       | 0.31 |

|        |                                                                                                 |            |                             |                                                                                     |                                                        |                                                                                        |            |            |      |
|--------|-------------------------------------------------------------------------------------------------|------------|-----------------------------|-------------------------------------------------------------------------------------|--------------------------------------------------------|----------------------------------------------------------------------------------------|------------|------------|------|
| P54115 | Magnesium-activated aldehyde dehydrogenase, cytosolic [OS=Saccharomyces cerevisiae S288c]       | 8560<br>44 | ALD6;<br>YPL061<br>W        | metabolic process;response to stimulus                                              | cytoplasm;cytosol;mitochondrion                        | catalytic activity                                                                     | 0.25       | 0.077      | 0.31 |
| P39677 | Ribosome-releasing factor 2, mitochondrial [OS=Saccharomyces cerevisiae S288c]                  | 8533<br>42 | MEF2;<br>YJL102<br>W        | cell organization and biogenesis;metabolic process                                  | cytosol;mitochondrion                                  | catalytic activity;nucleotide binding;RNA binding                                      | 0.179      | 0.056      | 0.31 |
| P40513 | Mitochondrial acidic protein MAM33 [OS=Saccharomyces cerevisiae S288c]                          | 8547<br>40 | MAM3<br>3;<br>YIL070<br>C   | metabolic process;regulation of biological process                                  | mitochondrion;organelle lumen                          | translation regulator activity                                                         | 3.642      | 1.154      | 0.32 |
| P32445 | Single-stranded DNA-binding protein RIM1, mitochondrial [OS=Saccharomyces cerevisiae S288c]     | 8503<br>95 | RIM1;<br>YCR028<br>C-A      | cell organization and biogenesis;metabolic process;regulation of biological process | mitochondrion                                          | DNA binding                                                                            | 3.642      | 1.154      | 0.32 |
| P81451 | ATP synthase subunit K, mitochondrial [OS=Saccharomyces cerevisiae S288c]                       | 8540<br>77 | ATP19;<br>YOL077<br>W-A     | cell organization and biogenesis;metabolic process;transport                        | membrane;mitochondrion                                 | catalytic activity;transporter activity                                                | 3.642      | 1.154      | 0.32 |
| P40008 | Protein FMP52, mitochondrial [OS=Saccharomyces cerevisiae S288c]                                | 8567<br>21 | FMP52;<br>YER004<br>W       |                                                                                     | endoplasmic reticulum;membrane;mitochondrion           | catalytic activity                                                                     | 3.217      | 1.054      | 0.33 |
| P33310 | ATP-dependent permease MDL1, mitochondrial [OS=Saccharomyces cerevisiae S288c]                  | 8508<br>85 | MDL1;<br>YLR188<br>W        | transport                                                                           | membrane;mitochondrion                                 | catalytic activity;nucleotide binding;transporter activity                             | 0.833      | 0.274      | 0.33 |
| P40471 | NADPH-dependent 1-acyldihydroxyacetone phosphate reductase [OS=Saccharomyces cerevisiae S288c]  | 8546<br>82 | AYR1;<br>YIL124<br>W        | metabolic process                                                                   | cytoplasm;endoplasmic reticulum;membrane;mitochondrion | catalytic activity                                                                     | 1.239      | 0.413      | 0.33 |
| P12686 | 37S ribosomal protein MRP13, mitochondrial [OS=Saccharomyces cerevisiae S288c]                  | 8529<br>75 | MRP13<br>;<br>YGR08<br>4C   | cell organization and biogenesis;metabolic process                                  | mitochondrion;ribosome                                 | structural molecule activity                                                           | 1.239      | 0.413      | 0.33 |
| P32898 | Mitochondrial presequence protease [OS=Saccharomyces cerevisiae S288c]                          | 8520<br>41 | CYM1;<br>YDR43<br>0C        | metabolic process                                                                   | mitochondrion                                          | catalytic activity;metal ion binding                                                   | 1.349      | 0.45       | 0.33 |
| P10662 | 37S ribosomal protein MRP1, mitochondrial [OS=Saccharomyces cerevisiae S288c]                   | 8519<br>48 | MRP1;<br>YDR34<br>7W        | cell organization and biogenesis;metabolic process;response to stimulus             | mitochondrion;ribosome                                 | antioxidant activity;catalytic activity;metal ion binding;structural molecule activity | 2.981      | 0.995      | 0.33 |
| P36163 | mitochondrial metalloendopeptidase OMA1 [OS=Saccharomyces cerevisiae S288c]                     | 8539<br>62 | OMA1;<br>YKR087<br>C        | metabolic process                                                                   | membrane;mitochondrion                                 | catalytic activity;metal ion binding                                                   | 0.73       | 0.245      | 0.34 |
| P38797 | Protein phosphatase 2C homolog 7, mitochondrial [OS=Saccharomyces cerevisiae S288c]             | 8564<br>75 | PTC7;<br>YHR07<br>6W        | metabolic process                                                                   | mitochondrion                                          | catalytic activity;metal ion binding;protein binding                                   | 0.688      | 0.233      | 0.34 |
| P53326 | Uncharacterized protein YGR266W [OS=Saccharomyces cerevisiae S288c]                             | 8531<br>82 | YGR26<br>6W;<br>YGR26<br>6W |                                                                                     | membrane;mitochondrion                                 |                                                                                        | 1.081      | 0.369      | 0.34 |
| P00410 | Cytochrome c oxidase subunit 2 [OS=Saccharomyces cerevisiae S288c]                              | 8546<br>22 | COX2;<br>QO250              | metabolic process;transport                                                         | membrane;mitochondrion                                 | catalytic activity;metal ion binding;protein binding;transporter activity              | 4.623      | 1.61       | 0.35 |
| P28817 | 3-hydroxyisobutyryl-CoA hydrolase, mitochondrial [OS=Saccharomyces cerevisiae S288c]            | 8516<br>06 | EHD3;<br>YDR03<br>6C        | metabolic process                                                                   | mitochondrion                                          | catalytic activity                                                                     | 1.395      | 0.487      | 0.35 |
| P32860 | NiU-like protein, mitochondrial [OS=Saccharomyces cerevisiae S288c]                             | 8538<br>26 | NFU1;<br>YKL040<br>C        | cell organization and biogenesis;cellular homeostasis;metabolic process             | mitochondrion;organelle lumen                          | metal ion binding                                                                      | 3.87       | 1.371      | 0.35 |
| P18900 | hexaprenyl pyrophosphate synthase, mitochondrial [OS=Saccharomyces cerevisiae S288c]            | 8522<br>88 | COQ1;<br>YBR003<br>W        | metabolic process                                                                   | membrane;mitochondrion                                 | catalytic activity;metal ion binding;protein binding                                   | 0.468      | 0.166      | 0.35 |
| P21306 | ATP synthase subunit epsilon, mitochondrial [OS=Saccharomyces cerevisiae S288c]                 | 8558<br>57 | ATP15;<br>YPL271<br>W       | metabolic process;transport                                                         | membrane;mitochondrion                                 | catalytic activity;transporter activity                                                | 2.162      | 0.778      | 0.36 |
| P39006 | Phosphatidylserine decarboxylase proenzyme 1, mitochondrial [OS=Saccharomyces cerevisiae S288c] | 8555<br>52 | PSD1;<br>YNL169<br>C        | metabolic process;regulation of biological process                                  | membrane;mitochondrion                                 | catalytic activity                                                                     | 0.743      | 0.269      | 0.36 |
| P36516 | 54S ribosomal protein L3, mitochondrial [OS=Saccharomyces cerevisiae S288c]                     | 8550<br>39 | MRP13;<br>YMR02<br>4W       | cell organization and biogenesis;metabolic process;response to stimulus             | mitochondrion;nucleus;ribosome                         | catalytic activity;RNA binding;structural molecule activity                            | 0.743      | 0.269      | 0.36 |
| P08067 | cytochrome b-c1 complex subunit Rieske, mitochondrial [OS=Saccharomyces cerevisiae S288c]       | 8566<br>89 | RIP1;<br>YEL024<br>W        | metabolic process;transport                                                         | membrane;mitochondrion                                 | catalytic activity;metal ion binding;transporter activity                              | 55.23<br>4 | 20.54<br>4 | 0.37 |
| P46681 | D-lactate dehydrogenase [cytochrome] 2, mitochondrial [OS=Saccharomyces cerevisiae S288c]       | 8513<br>76 | DLD2;<br>YDL178<br>W        | metabolic process                                                                   | mitochondrion;organelle lumen                          | catalytic activity;nucleotide binding;protein binding                                  | 1.829      | 0.682      | 0.37 |
| Q02784 | Monothiol glutaredoxin-5, mitochondrial [OS=Saccharomyces                                       | 8560<br>48 | GRX5;<br>YPL059             | cell organization and biogenesis;cellular                                           | mitochondrion;organelle lumen                          | catalytic activity;metal ion                                                           | 1.783      | 0.668      | 0.37 |

|        |                                                                                                   |            |                             |                                                                                                          |                                                       |                                                                            |            |            |      |
|--------|---------------------------------------------------------------------------------------------------|------------|-----------------------------|----------------------------------------------------------------------------------------------------------|-------------------------------------------------------|----------------------------------------------------------------------------|------------|------------|------|
|        | cerevisiae S288c]                                                                                 |            | W                           | homeostasis;metabolic process;regulation of biological process;response to stimulus                      |                                                       | binding                                                                    |            |            |      |
| P53732 | 375 ribosomal protein S12, mitochondrial [OS=Saccharomyces cerevisiae S288c]                      | 8557<br>72 | MRP51<br>2;<br>YNR03<br>6C  | cell organization and biogenesis;metabolic process                                                       | mitochondrion;ribosome                                | structural molecule activity                                               | 1.783      | 0.668      | 0.37 |
| Q12298 | uncharacterized ABC transporter ATP-binding protein YDR061W [OS=Saccharomyces cerevisiae S288c]   | 8516<br>33 | YDR06<br>1W;<br>YDR06<br>1W |                                                                                                          | mitochondrion                                         | catalytic activity;nucleotide binding                                      | 0.512      | 0.194      | 0.38 |
| Q03798 | Altered inheritance of mitochondria protein 36, mitochondrial [OS=Saccharomyces cerevisiae S288c] | 8551<br>89 | AIM36;<br>YMR15<br>7C       |                                                                                                          | membrane;mitochondrion                                |                                                                            | 1.637      | 0.624      | 0.38 |
| Q04458 | Fatty aldehyde dehydrogenase HFD1 [OS=Saccharomyces cerevisiae S288c]                             | 8551<br>37 | HFD1;<br>YMR11<br>0C        | metabolic process                                                                                        | endoplasmic reticulum;endosome;membrane;mitochondrion | catalytic activity                                                         | 4.055      | 1.555      | 0.38 |
| P53140 | Protein RMD9, mitochondrial [OS=Saccharomyces cerevisiae S288c]                                   | 8527<br>71 | RMD9;<br>YGL107<br>C        | cell differentiation;metabolic process;regulation of biological process                                  | membrane;mitochondrion                                | RNA binding                                                                | 1.512      | 0.585      | 0.39 |
| P40364 | Mitochondrial peculiar membrane protein 1 [OS=Saccharomyces cerevisiae S288c]                     | 8533<br>79 | MPM1;<br>YJL066<br>C        |                                                                                                          | membrane;mitochondrion                                |                                                                            | 1.512      | 0.585      | 0.39 |
| P40502 | Altered inheritance of mitochondria protein 19, mitochondrial [OS=Saccharomyces cerevisiae S288c] | 8547<br>22 | AIM19;<br>YIL087<br>C       |                                                                                                          | membrane;mitochondrion                                |                                                                            | 1.512      | 0.585      | 0.39 |
| P00830 | ATP synthase subunit beta, mitochondrial [OS=Saccharomyces cerevisiae S288c]                      | 8535<br>85 | ATP2;<br>YJR121<br>W        | metabolic process;transport                                                                              | cytosol;membrane;mitochondrion                        | catalytic activity;nucleotide binding;protein binding;transporter activity | 78.43<br>3 | 30.62<br>3 | 0.39 |
| P21560 | Protein CBP3, mitochondrial [OS=Saccharomyces cerevisiae S288c]                                   | 8558<br>86 | CBP3;<br>YPL215<br>W        | cell organization and biogenesis;regulation of biological process                                        | membrane;mitochondrion;ribosome                       |                                                                            | 1.424      | 0.557      | 0.39 |
| P32904 | 54S ribosomal protein L6, mitochondrial [OS=Saccharomyces cerevisiae S288c]                       | 8565<br>52 | MRPL6;<br>YHR14<br>7C       | cell organization and biogenesis;metabolic process                                                       | mitochondrion;ribosome                                | RNA binding;structural molecule activity                                   | 1.371      | 0.54       | 0.39 |
| P36775 | Lon protease homolog, mitochondrial [OS=Saccharomyces cerevisiae S288c]                           | 8522<br>59 | PIM1;<br>YBL022<br>C        | cell organization and biogenesis;metabolic process;regulation of biological process;response to stimulus | cytoplasm;mitochondrion;organelle lumen               | catalytic activity;DNA binding;nucleotide binding;RNA binding              | 1.362      | 0.537      | 0.39 |
| Q06892 | NADH kinase POS5, mitochondrial [OS=Saccharomyces cerevisiae S288c]                               | 8559<br>13 | POS5;<br>YPL188<br>W        | metabolic process;response to stimulus                                                                   | mitochondrion;organelle lumen                         | catalytic activity;nucleotide binding                                      | 1.31       | 0.52       | 0.40 |
| P53163 | 54S ribosomal protein L12, mitochondrial [OS=Saccharomyces cerevisiae S288c]                      | 8528<br>11 | MNP1;<br>YGL068<br>W        | cell organization and biogenesis;metabolic process                                                       | mitochondrion;ribosome                                | RNA binding;structural molecule activity                                   | 1.31       | 0.52       | 0.40 |
| P00175 | Cytochrome b2, mitochondrial [OS=Saccharomyces cerevisiae S288c]                                  | 8549<br>50 | CYB2;<br>YML05<br>4C        | metabolic process;transport                                                                              | cytosol;membrane;mitochondrion;nucleus                | catalytic activity;metal ion binding;nucleotide binding                    | 1.239      | 0.496      | 0.40 |
| P07253 | cytochrome B pre-mRNA-processing protein 6 [OS=Saccharomyces cerevisiae S288c]                    | 8524<br>17 | CBP6;<br>YBR120<br>C        | cell organization and biogenesis;metabolic process;regulation of biological process                      | mitochondrion;ribosome                                |                                                                            | 4.179      | 1.683      | 0.40 |
| Q02486 | ARS-binding factor 2, mitochondrial [OS=Saccharomyces cerevisiae S288c]                           | 8550<br>94 | ABF2;<br>YMR07<br>2W        | cell organization and biogenesis;metabolic process;regulation of biological process                      | chromosome;mitochondrion;nucleus                      | DNA binding                                                                | 69.17      | 27.94<br>3 | 0.40 |
| P40961 | prohibitin-1 [OS=Saccharomyces cerevisiae S288c]                                                  | 8530<br>33 | PHB1;<br>YGR13<br>2C        | cell organization and biogenesis;metabolic process;regulation of biological process                      | membrane;mitochondrion                                | protein binding                                                            | 6.848      | 2.793      | 0.41 |
| Q04599 | 54S ribosomal protein L1, mitochondrial [OS=Saccharomyces cerevisiae S288c]                       | 8516<br>94 | MRPL1;<br>YDR11<br>6C       | cell organization and biogenesis;metabolic process                                                       | mitochondrion;ribosome                                | RNA binding;structural molecule activity                                   | 1.069      | 0.438      | 0.41 |
| P00927 | Threonine dehydratase, mitochondrial [OS=Saccharomyces cerevisiae S288c]                          | 8568<br>19 | ILV1;<br>YER086<br>W        | metabolic process                                                                                        | cytoplasm;mitochondrion                               | catalytic activity                                                         | 3.125      | 1.285      | 0.41 |
| P07246 | Alcohol dehydrogenase 3, mitochondrial [OS=Saccharomyces cerevisiae S288c]                        | 8551<br>07 | ADH3;<br>YMR08<br>3W        | metabolic process                                                                                        | mitochondrion;organelle lumen                         | catalytic activity;metal ion binding                                       | 10.15<br>9 | 4.179      | 0.41 |
| Q06678 | 54S ribosomal protein L35, mitochondrial [OS=Saccharomyces cerevisiae S288c]                      | 8519<br>21 | MRPL3<br>5;<br>YDR32<br>2W  | cell organization and biogenesis;metabolic process                                                       | mitochondrion;ribosome                                | structural molecule activity                                               | 1.031      | 0.425      | 0.41 |
| P35180 | mitochondrial import receptor subunit Tom20 [OS=Saccharomyces cerevisiae S288c]                   | 8529<br>73 | TOM20<br>;<br>YGR08<br>2W   | cell organization and biogenesis;transport                                                               | membrane;mitochondrion                                | protein binding;transporter activity                                       | 1.031      | 0.425      | 0.41 |
| P43617 | Uncharacterized mitochondrial carrier YFR045W [OS=Saccharomyces cerevisiae S288c]                 | 8506<br>06 | YFR045<br>W;<br>YFR045<br>W | metabolic process;transport                                                                              | membrane;mitochondrion                                | structural molecule activity;transporter activity                          | 0.995      | 0.413      | 0.42 |
| P04037 | cytochrome c oxidase subunit 4, mitochondrial [OS=Saccharomyces cerevisiae S288c]                 | 8526<br>88 | COX4;<br>YGL187<br>C        | cell organization and biogenesis;metabolic process;transport                                             | membrane;mitochondrion                                | catalytic activity;metal ion binding;transporter activity                  | 42.28<br>8 | 17.73<br>8 | 0.42 |

|        |                                                                                                            |            |                                      |                                                                                                          |                                                 |                                                                           |            |            |      |
|--------|------------------------------------------------------------------------------------------------------------|------------|--------------------------------------|----------------------------------------------------------------------------------------------------------|-------------------------------------------------|---------------------------------------------------------------------------|------------|------------|------|
|        |                                                                                                            |            |                                      |                                                                                                          |                                                 | r activity                                                                |            |            |      |
| P33416 | Heat shock protein 78, mitochondrial [OS=Saccharomyces cerevisiae S288c]                                   | 8518<br>45 | HSP78;<br>YDR25<br>8C                | cell organization and biogenesis;metabolic process;regulation of biological process;response to stimulus | mitochondrion;organelle lumen                   | catalytic activity;nucleotide binding;protein binding                     | 7.929      | 3.359      | 0.42 |
| Q08968 | UPF0061 protein FMP40 [OS=Saccharomyces cerevisiae S288c]                                                  | 8558<br>79 | FMP40;<br>YPL222<br>W                |                                                                                                          | mitochondrion                                   | protein binding                                                           | 2.162      | 0.917      | 0.42 |
| P25573 | Mitochondrial inner membrane i-AAA protease supercomplex subunit MGR1 [OS=Saccharomyces cerevisiae S288c]  | 8503<br>13 | MGR1;<br>YCL044<br>C                 | metabolic process                                                                                        | membrane;mitochondrion                          | protein binding                                                           | 1.649      | 0.701      | 0.43 |
| P40053 | Altered inheritance of mitochondria protein 9, mitochondrial [OS=Saccharomyces cerevisiae S288c]           | 8568<br>13 | AIM9;<br>YER080<br>W                 |                                                                                                          | mitochondrion                                   |                                                                           | 4.555      | 1.938      | 0.43 |
| Q06236 | Mitochondrial inner membrane protein SHH4 [OS=Saccharomyces cerevisiae S288c]                              | 8508<br>61 | SHH4;<br>YLR164<br>W                 | metabolic process                                                                                        | membrane;mitochondrion                          | catalytic activity;metal ion binding                                      | 3.217      | 1.371      | 0.43 |
| P36101 | tRNA threonylcarbamoyladenine dehydratase 2 [OS=Saccharomyces cerevisiae S288c]                            | 8538<br>41 | TCD2;<br>YKL027<br>W;<br>YKL027<br>W | metabolic process                                                                                        | cytosol;membrane;mitochondrion                  | catalytic activity;nucleotide binding                                     | 0.778      | 0.334      | 0.43 |
| P32843 | Mitochondrial escape protein 2 [OS=Saccharomyces cerevisiae S288c]                                         | 8553<br>48 | YME2;<br>YMR30<br>2C                 | cell organization and biogenesis;metabolic process                                                       | membrane;mitochondrion                          | nucleotide binding;RNA binding                                            | 5.158      | 2.227      | 0.43 |
| P53220 | Mitochondrial import inner membrane translocase subunit TIM21 [OS=Saccharomyces cerevisiae S288c]          | 8529<br>21 | TIM21;<br>YGR03<br>3C                | cell organization and biogenesis;transport                                                               | membrane;mitochondrion                          | protein binding                                                           | 0.719      | 0.311      | 0.43 |
| P07256 | Cytochrome b-c1 complex subunit 1, mitochondrial [OS=Saccharomyces cerevisiae S288c]                       | 8522<br>35 | COR1;<br>YBL045<br>C                 | metabolic process;transport                                                                              | membrane;mitochondrion                          | catalytic activity;metal ion binding;protein binding;transporter activity | 18.78<br>3 | 8.183      | 0.44 |
| P40159 | Uncharacterized protein YNL208W [OS=Saccharomyces cerevisiae S288c]                                        | 8555<br>13 | YNL208<br>W;<br>YNL208<br>W          |                                                                                                          | membrane;mitochondrion;ribosome                 |                                                                           | 0.668      | 0.292      | 0.44 |
| P40012 | protoporphyrinogen oxidase [OS=Saccharomyces cerevisiae S288c]                                             | 8567<br>33 | HEM14<br>;<br>YER014<br>W            | metabolic process                                                                                        | membrane;mitochondrion                          | catalytic activity                                                        | 2.162      | 0.947      | 0.44 |
| P40581 | peroxiredoxin HYR1 [OS=Saccharomyces cerevisiae S288c]                                                     | 8548<br>55 | HYR1;<br>YIR037<br>W                 | metabolic process;response to stimulus                                                                   | cytoplasm;cytosol;mitochondrion;organelle lumen | antioxidant activity;catalytic activity                                   | 0.585      | 0.259      | 0.44 |
| P40530 | [Pyruvate dehydrogenase (acetyl-transferring)] kinase 1, mitochondrial [OS=Saccharomyces cerevisiae S288c] | 8547<br>69 | PKP1;<br>YIL042<br>C                 | metabolic process                                                                                        | mitochondrion;organelle lumen                   | catalytic activity;nucleotide binding;protein binding                     | 0.551      | 0.245      | 0.44 |
| P36520 | S4S ribosomal protein L10, mitochondrial [OS=Saccharomyces cerevisiae S288c]                               | 8554<br>36 | MRPL1<br>0;<br>YNL284<br>C           | cell organization and biogenesis;metabolic process                                                       | mitochondrion;ribosome                          | structural molecule activity                                              | 0.551      | 0.245      | 0.44 |
| P38152 | Tricarboxylate transport protein [OS=Saccharomyces cerevisiae S288c]                                       | 8525<br>94 | CTP1;<br>YBR291<br>C                 | metabolic process;transport                                                                              | membrane;mitochondrion                          | structural molecule activity;transporter activity                         | 0.551      | 0.245      | 0.44 |
| P39522 | Dihydroxy-acid dehydratase, mitochondrial [OS=Saccharomyces cerevisiae S288c]                              | 8534<br>73 | ILV3;<br>YJR016<br>C                 | metabolic process                                                                                        | mitochondrion                                   | catalytic activity;metal ion binding                                      | 29.53<br>9 | 13.17<br>5 | 0.45 |
| P10507 | mitochondrial-processing peptidase subunit beta [OS=Saccharomyces cerevisiae S288c]                        | 8508<br>60 | MAS1;<br>YLR163<br>C                 | metabolic process;transport                                                                              | mitochondrion;organelle lumen                   | catalytic activity;metal ion binding;protein binding                      | 1.371      | 0.616      | 0.45 |
| P53312 | Succinyl-CoA ligase [ADP-forming] subunit beta, mitochondrial [OS=Saccharomyces cerevisiae S288c]          | 8531<br>59 | LSC2;<br>YGR24<br>4C                 | metabolic process                                                                                        | mitochondrion                                   | catalytic activity;nucleotide binding                                     | 20.01<br>7 | 9          | 0.45 |
| Q06567 | ABC1 family protein MCP2 [OS=Saccharomyces cerevisiae S288c]                                               | 8509<br>55 | MCP2;<br>YLR253<br>W                 | cell organization and biogenesis                                                                         | membrane;mitochondrion                          |                                                                           | 0.484      | 0.218      | 0.45 |
| P38702 | mitochondrial carrier protein LEU5 [OS=Saccharomyces cerevisiae S288c]                                     | 8563<br>91 | LEU5;<br>YHR00<br>2W                 | metabolic process;transport                                                                              | membrane;mitochondrion                          | structural molecule activity;transporter activity                         | 0.468      | 0.212      | 0.45 |
| P34224 | Uncharacterized protein YBL059W [OS=Saccharomyces cerevisiae S288c]                                        | 8522<br>21 | YBL059<br>W;<br>YBL059<br>W          |                                                                                                          | membrane;mitochondrion                          |                                                                           | 0.468      | 0.212      | 0.45 |
| P27929 | 37S ribosomal protein NAM9, mitochondrial [OS=Saccharomyces cerevisiae S288c]                              | 8555<br>85 | NAM9;<br>YNL137<br>C                 | cell organization and biogenesis;metabolic process;regulation of biological process                      | mitochondrion;ribosome                          | RNA binding;structural molecule activity                                  | 1.062      | 0.484      | 0.46 |
| P32839 | Mitochondrial chaperone BCS1 [OS=Saccharomyces cerevisiae S288c]                                           | 8519<br>81 | BCS1;<br>YDR37<br>5C                 | cell organization and biogenesis;metabolic process;response to stimulus;transport                        | cytosol;membrane;mitochondrion                  | catalytic activity;nucleotide binding;transporter activity                | 0.425      | 0.194      | 0.46 |

|        |                                                                                                                                                       |        |                   |                                                                                                                               |                                                  |                                                                           |       |       |      |
|--------|-------------------------------------------------------------------------------------------------------------------------------------------------------|--------|-------------------|-------------------------------------------------------------------------------------------------------------------------------|--------------------------------------------------|---------------------------------------------------------------------------|-------|-------|------|
| Q01976 | ADP-ribose pyrophosphatase [OS=Saccharomyces cerevisiae S288c]                                                                                        | 852408 | YSA1; YBR111C     | metabolic process                                                                                                             | cytoplasm;mitochondrion;nucleus                  | catalytic activity;metal ion binding                                      | 0.425 | 0.194 | 0.46 |
| Q04487 | Mitochondrial inner membrane protein SHH3 [OS=Saccharomyces cerevisiae S288c]                                                                         | 855145 | SHH3; YMR118C     | metabolic process                                                                                                             | membrane;mitochondrion                           | catalytic activity;metal ion binding                                      | 0.425 | 0.194 | 0.46 |
| Q12428 | Probable 2-methylcitrate dehydratase [OS=Saccharomyces cerevisiae S288c]                                                                              | 856108 | PDH1; YPR002W     | metabolic process                                                                                                             | cytoplasm;membrane;mitochondrion                 | catalytic activity                                                        | 18.11 | 8.306 | 0.46 |
| Q04172 | Sensitive to high expression protein 9, mitochondrial [OS=Saccharomyces cerevisiae S288c]                                                             | 852002 | SHE9; YDR393W     | cell organization and biogenesis                                                                                              | membrane;mitochondrion                           |                                                                           | 0.374 | 0.172 | 0.46 |
| P25348 | 54S ribosomal protein L32, mitochondrial [OS=Saccharomyces cerevisiae S288c]                                                                          | 850359 | MRPL32; YCR003W   | cell organization and biogenesis;metabolic process                                                                            | membrane;mitochondrion;ribosome                  | RNA binding;structural molecule activity                                  | 0.389 | 0.179 | 0.46 |
| Q03713 | Respiratory supercomplex factor 1, mitochondrial [OS=Saccharomyces cerevisiae S288c]                                                                  | 854978 | RCF1; YML030W     | cell organization and biogenesis                                                                                              | membrane;mitochondrion                           |                                                                           | 2.162 | 0.995 | 0.46 |
| P17558 | 37S ribosomal protein PET123, mitochondrial [OS=Saccharomyces cerevisiae S288c]                                                                       | 854329 | PET123; YOR158W   | cell organization and biogenesis;metabolic process                                                                            | mitochondrion;ribosome                           | structural molecule activity                                              | 1.448 | 0.668 | 0.46 |
| Q06630 | Mitochondrial homologous recombination protein 1 [OS=Saccharomyces cerevisiae S288c]                                                                  | 851890 | MHR1; YDR296W     | cell organization and biogenesis;metabolic process;regulation of biological process;response to stimulus                      | mitochondrion;nucleus                            | catalytic activity;DNA binding;structural molecule activity               | 0.359 | 0.166 | 0.46 |
| P48360 | Probable NADPH:adenodoxin oxidoreductase, mitochondrial [OS=Saccharomyces cerevisiae S288c]                                                           | 851982 | ARH1; YDR376W     | cellular homeostasis;metabolic process;transport                                                                              | cytoplasm;membrane;mitochondrion;organelle lumen | catalytic activity                                                        | 0.346 | 0.16  | 0.46 |
| P36523 | 54S ribosomal protein L15, mitochondrial [OS=Saccharomyces cerevisiae S288c]                                                                          | 851022 | MRPL15; YLR312W-A | cell organization and biogenesis;metabolic process                                                                            | mitochondrion;ribosome                           | catalytic activity;RNA binding;structural molecule activity               | 0.334 | 0.155 | 0.46 |
| P38523 | GrpE protein homolog, mitochondrial [OS=Saccharomyces cerevisiae S288c]                                                                               | 854407 | MGE1; YOR232W     | metabolic process;regulation of biological process;transport                                                                  | membrane;mitochondrion;organelle lumen           | enzyme regulator activity;nucleotide binding;protein binding              | 1.336 | 0.624 | 0.47 |
| P25270 | rRNA methyltransferase 1, mitochondrial [OS=Saccharomyces cerevisiae S288c]                                                                           | 854376 | MRM1; YOR201C     | metabolic process                                                                                                             | mitochondrion                                    | catalytic activity;RNA binding                                            | 0.274 | 0.129 | 0.47 |
| P39722 | Mitochondrial Rho GTPase 1 [OS=Saccharomyces cerevisiae S288c]                                                                                        | 851249 | GEM1; YAL048C     | cell organization and biogenesis;regulation of biological process;response to stimulus;transport                              | membrane;mitochondrion                           | catalytic activity;metal ion binding;nucleotide binding                   | 0.259 | 0.122 | 0.47 |
| P00445 | Superoxide dismutase [Cu-Zn] [OS=Saccharomyces cerevisiae S288c]                                                                                      | 853568 | SOD1; YJR104C     | cell organization and biogenesis;cellular homeostasis;metabolic process;regulation of biological process;response to stimulus | cytoplasm;cytosol;mitochondrion;nucleus          | antioxidant activity;catalytic activity;metal ion binding;protein binding | 1.848 | 0.874 | 0.47 |
| O14467 | multi-protein-bridging factor 1 [OS=Saccharomyces cerevisiae S288c]                                                                                   | 854474 | MBF1; YOR298C-A   | metabolic process;regulation of biological process                                                                            | cytoplasm;mitochondrion;nucleus                  | DNA binding                                                               | 1.848 | 0.874 | 0.47 |
| P49367 | Homoaconitase, mitochondrial [OS=Saccharomyces cerevisiae S288c]                                                                                      | 851820 | LYS4; YDR234W     | metabolic process                                                                                                             | mitochondrion                                    | catalytic activity;metal ion binding;protein binding                      | 1.54  | 0.73  | 0.47 |
| P36046 | Mitochondrial intermembrane space import and assembly protein 40 [OS=Saccharomyces cerevisiae S288c]                                                  | 853639 | MIA40; YKL195W    | cellular component movement;metabolic process;response to stimulus;transport                                                  | membrane;mitochondrion                           | catalytic activity;protein binding;transporter activity                   | 3.262 | 1.555 | 0.48 |
| P53881 | 54S ribosomal protein L22, mitochondrial [OS=Saccharomyces cerevisiae S288c]                                                                          | 855544 | MRPL22; YNL177C   | cell organization and biogenesis;metabolic process                                                                            | mitochondrion;ribosome                           | RNA binding;structural molecule activity                                  | 1.154 | 0.551 | 0.48 |
| P51998 | 54S ribosomal protein yml6, mitochondrial [OS=Saccharomyces cerevisiae S288c]                                                                         | 854983 | YML6; YML025C     | cell organization and biogenesis;metabolic process                                                                            | mitochondrion;ribosome                           | RNA binding;structural molecule activity                                  | 1.154 | 0.551 | 0.48 |
| P19262 | Dihydropyridyllysine-residue succinyltransferase component of 2-oxoglutarate dehydrogenase complex, mitochondrial [OS=Saccharomyces cerevisiae S288c] | 851726 | KGD2; YDR148C     | cell organization and biogenesis;metabolic process                                                                            | mitochondrion                                    | catalytic activity;protein binding                                        | 6.406 | 3.062 | 0.48 |
| P33311 | ATP-dependent permease MDL2, mitochondrial [OS=Saccharomyces cerevisiae S288c]                                                                        | 855858 | MDL2; YPL270W     | response to stimulus;transport                                                                                                | membrane;mitochondrion                           | catalytic activity;nucleotide binding;transporter activity                | 1.116 | 0.535 | 0.48 |
| P00401 | Cytochrome c oxidase subunit 1 [OS=Saccharomyces cerevisiae S288c]                                                                                    | 854598 | COX1; Q0045       | metabolic process;transport                                                                                                   | membrane;mitochondrion                           | catalytic activity;metal ion binding;transporter activity                 | 1.61  | 0.778 | 0.48 |
| Q08818 | Meiotic sister-chromatid recombination protein 6, mitochondrial [OS=Saccharomyces cerevisiae S288c]                                                   | 854536 | MSC6; YOR354C     | metabolic process                                                                                                             | mitochondrion;organelle lumen                    | RNA binding                                                               | 1.047 | 0.506 | 0.48 |
| P49095 | Glycine dehydrogenase (Decarboxylating), mitochondrial                                                                                                | 855227 | GCV2; YMR18       | metabolic process                                                                                                             | cytosol;mitochondrion                            | catalytic activity                                                        | 2.433 | 1.184 | 0.49 |

|        |                                                                                                                    |            |                             |                                                                                   |                                                 |                                                                         |        |        |      |
|--------|--------------------------------------------------------------------------------------------------------------------|------------|-----------------------------|-----------------------------------------------------------------------------------|-------------------------------------------------|-------------------------------------------------------------------------|--------|--------|------|
|        | [OS=Saccharomyces cerevisiae S288c]                                                                                |            | 9W                          |                                                                                   |                                                 |                                                                         |        |        |      |
| P37298 | Succinate dehydrogenase [ubiquinone] cytochrome b small subunit, mitochondrial [OS=Saccharomyces cerevisiae S288c] | 8517<br>58 | SDH4;<br>YDR17<br>8W        | metabolic process;transport                                                       | membrane;mitochondrion                          | catalytic activity;metal ion binding                                    | 3.642  | 1.783  | 0.49 |
| P32795 | Mitochondrial inner membrane i-AAA protease supercomplex subunit YME1 [OS=Saccharomyces cerevisiae S288c]          | 8561<br>35 | YME1;<br>YPR024<br>W        | metabolic process;response to stimulus;transport                                  | membrane;mitochondrion                          | catalytic activity;metal ion binding;nucleotide binding;protein binding | 1.798  | 0.891  | 0.50 |
| P08417 | fumarate hydratase, mitochondrial [OS=Saccharomyces cerevisiae S288c]                                              | 8558<br>66 | FUM1;<br>YPL262<br>W        | cell organization and biogenesis;metabolic process                                | cytoplasm;cytosol;mitochondrion;organelle lumen | catalytic activity                                                      | 13.874 | 6.88   | 0.50 |
| P33421 | Succinate dehydrogenase [ubiquinone] cytochrome b subunit, mitochondrial [OS=Saccharomyces cerevisiae S288c]       | 8537<br>16 | SDH3;<br>YKL141<br>W        | cell organization and biogenesis;metabolic process;transport                      | membrane;mitochondrion                          | catalytic activity;metal ion binding                                    | 1.276  | 0.638  | 0.50 |
| P53969 | Sorting assembly machinery 50 kDa subunit [OS=Saccharomyces cerevisiae S288c]                                      | 8557<br>05 | SAM50<br>;<br>YNL026<br>W   | cell organization and biogenesis;transport                                        | membrane;mitochondrion                          | protein binding;transporter activity                                    | 0.743  | 0.374  | 0.50 |
| P25719 | Peptidyl-prolyl cis-trans isomerase C, mitochondrial [OS=Saccharomyces cerevisiae S288c]                           | 8548<br>97 | CPR3;<br>YML07<br>8W        | cell death;metabolic process                                                      | mitochondrion;organelle lumen                   | catalytic activity                                                      | 2.981  | 1.512  | 0.51 |
| P40035 | Mitochondrial phosphate carrier protein 2 [OS=Saccharomyces cerevisiae S288c]                                      | 8567<br>79 | PIC2;<br>YER053<br>C        | cellular homeostasis;metabolic process;transport                                  | membrane;mitochondrion                          | structural molecule activity;transporter activity                       | 1.637  | 0.833  | 0.51 |
| Q08023 | Protein FMP25, mitochondrial [OS=Saccharomyces cerevisiae S288c]                                                   | 8507<br>66 | FMP25;<br>YLR077<br>W       | cell organization and biogenesis                                                  | membrane;mitochondrion                          |                                                                         | 1.412  | 0.719  | 0.51 |
| P47045 | mitochondrial import inner membrane translocase subunit TIM54 [OS=Saccharomyces cerevisiae S288c]                  | 8533<br>92 | TIM54;<br>YJL054<br>W       | cell organization and biogenesis;transport                                        | cytosol;membrane;mitochondrion                  | transporter activity                                                    | 0.655  | 0.334  | 0.51 |
| P38127 | mitochondrial carrier protein RIM2 [OS=Saccharomyces cerevisiae S288c]                                             | 8524<br>91 | RIM2;<br>YBR192<br>W        | cell organization and biogenesis;metabolic process;transport                      | membrane;mitochondrion                          | structural molecule activity;transporter activity                       | 1.512  | 0.778  | 0.51 |
| P32335 | Protein MSS51, mitochondrial [OS=Saccharomyces cerevisiae S288c]                                                   | 8509<br>00 | MSS51;<br>YLR203<br>C       | metabolic process;regulation of biological process                                | membrane;mitochondrion                          | protein binding;translation regulator activity                          | 1.929  | 0.995  | 0.52 |
| P53982 | isocitrate dehydrogenase [NADP] [OS=Saccharomyces cerevisiae S288c]                                                | 8557<br>23 | IDP3;<br>YNL009<br>W        | metabolic process                                                                 | cytoplasm;mitochondrion                         | catalytic activity;metal ion binding;nucleotide binding                 | 2.652  | 1.371  | 0.52 |
| P53889 | uncharacterized mitochondrial hydrolase FMP41 [OS=Saccharomyces cerevisiae S288c]                                  | 8555<br>53 | FMP41;<br>YNL168<br>C       | metabolic process                                                                 | mitochondrion                                   | catalytic activity;metal ion binding                                    | 0.968  | 0.501  | 0.52 |
| P25374 | Cysteine desulfurase, mitochondrial [OS=Saccharomyces cerevisiae S288c]                                            | 8503<br>43 | NFS1;<br>YCL017<br>C        | cell organization and biogenesis;cellular homeostasis;metabolic process           | mitochondrion;nucleus                           | catalytic activity;metal ion binding;protein binding                    | 2.594  | 1.346  | 0.52 |
| Q12289 | mitochondrial carnitine carrier [OS=Saccharomyces cerevisiae S288c]                                                | 8542<br>67 | CRC1;<br>YOR10<br>OC        | metabolic process;transport                                                       | membrane;mitochondrion                          | structural molecule activity;transporter activity                       | 1.404  | 0.73   | 0.52 |
| P37293 | N-terminal acetyltransferase 2 [OS=Saccharomyces cerevisiae S288c]                                                 | 8530<br>50 | NAT2;<br>YGR14<br>7C        | metabolic process                                                                 | cytoplasm;mitochondrion                         | catalytic activity                                                      | 1.404  | 0.73   | 0.52 |
| P36151 | Uncharacterized protein YKR070W [OS=Saccharomyces cerevisiae S288c]                                                | 8539<br>44 | YKR070<br>W;<br>YKR070<br>W | metabolic process                                                                 | mitochondrion                                   |                                                                         | 0.833  | 0.438  | 0.53 |
| P16387 | Pyruvate dehydrogenase E1 component subunit alpha, mitochondrial [OS=Saccharomyces cerevisiae S288c]               | 8569<br>25 | PDA1;<br>YER178<br>W        | cell growth;metabolic process                                                     | mitochondrion;organelle lumen                   | catalytic activity                                                      | 21.638 | 11.496 | 0.53 |
| P43567 | alanine-glyoxylate aminotransferase 1 [OS=Saccharomyces cerevisiae S288c]                                          | 8505<br>14 | AGX1;<br>YFL030<br>W        | metabolic process                                                                 | cytosol;mitochondrion                           | catalytic activity                                                      | 2.162  | 1.154  | 0.53 |
| P01097 | ATPase inhibitor, mitochondrial [OS=Saccharomyces cerevisiae S288c]                                                | 8513<br>47 | INH1;<br>YDL181<br>W        | metabolic process;regulation of biological process                                | mitochondrion                                   | catalytic activity;enzyme regulator activity;protein binding            | 2.162  | 1.154  | 0.53 |
| P32317 | Protein AFG1 [OS=Saccharomyces cerevisiae S288c]                                                                   | 8566<br>58 | AFG1;<br>YEL052<br>W        | cell organization and biogenesis;metabolic process;response to stimulus;transport | membrane;mitochondrion                          | catalytic activity;nucleotide binding                                   | 1.326  | 0.711  | 0.54 |
| Q12031 | Mitochondrial 2-methylisocitrate lyase [OS=Saccharomyces cerevisiae S288c]                                         | 8561<br>14 | ICL2;<br>YPR006<br>C        | metabolic process                                                                 | mitochondrion;organelle lumen                   | catalytic activity                                                      | 5.158  | 2.793  | 0.54 |

|        |                                                                                                                      |            |                             |                                                                                                          |                                        |                                                                                |            |            |      |
|--------|----------------------------------------------------------------------------------------------------------------------|------------|-----------------------------|----------------------------------------------------------------------------------------------------------|----------------------------------------|--------------------------------------------------------------------------------|------------|------------|------|
| P46367 | Potassium-activated aldehyde dehydrogenase, mitochondrial [OS=Saccharomyces cerevisiae S288c]                        | 8545<br>56 | ALD4;<br>YOR37<br>4W        | metabolic process                                                                                        | mitochondrion;organelle lumen          | catalytic activity                                                             | 47.49<br>7 | 25.82<br>7 | 0.54 |
| P35191 | DnaJ homolog 1, mitochondrial [OS=Saccharomyces cerevisiae S288c]                                                    | 8505<br>30 | MDJ1;<br>YFL016<br>C        | cell organization and biogenesis;metabolic process;regulation of biological process;response to stimulus | mitochondrion;organelle lumen          | enzyme regulator activity;metal ion binding;nucleotide binding;protein binding | 3.037      | 1.656      | 0.55 |
| Q02883 | N-acyl-phosphatidylethanolamine-hydrolyzing phospholipase D, mitochondrial [OS=Saccharomyces cerevisiae S288c]       | 8560<br>01 | FMP30;<br>YPL103<br>C       | metabolic process                                                                                        | membrane;mitochondrion                 | catalytic activity;metal ion binding                                           | 0.557      | 0.304      | 0.55 |
| P39925 | Mitochondrial respiratory chain complexes assembly protein AFG3 [OS=Saccharomyces cerevisiae S288c]                  | 8567<br>37 | AFG3;<br>YER017<br>C        | cell organization and biogenesis;metabolic process;response to stimulus;transport                        | membrane;mitochondrion                 | catalytic activity;metal ion binding;nucleotide binding;protein binding        | 1.342      | 0.734      | 0.55 |
| Q08822 | Probable electron transfer flavoprotein-ubiquinone oxidoreductase, mitochondrial [OS=Saccharomyces cerevisiae S288c] | 8545<br>38 | CIR2;<br>YOR35<br>6W        | metabolic process;transport                                                                              | membrane;mitochondrion                 | catalytic activity;metal ion binding;nucleotide binding                        | 3.424      | 1.873      | 0.55 |
| P38071 | Enoyl-[acyl-carrier protein] reductase [NADPH, B-specific], mitochondrial [OS=Saccharomyces cerevisiae S288c]        | 8523<br>14 | ETR1;<br>YBR026<br>C        | metabolic process                                                                                        | mitochondrion;organelle lumen          | catalytic activity;DNA binding;metal ion binding                               | 9          | 4.926      | 0.55 |
| P39987 | Heat shock protein SSC3, mitochondrial [OS=Saccharomyces cerevisiae S288c]                                           | 8566<br>82 | ECM10<br>;<br>YEL030<br>W   | cell organization and biogenesis;metabolic process;transport                                             | mitochondrion                          | nucleotide binding;protein binding                                             | 2.162      | 1.198      | 0.55 |
| P36525 | 54S ribosomal protein L24, mitochondrial [OS=Saccharomyces cerevisiae S288c]                                         | 8552<br>31 | MRPL2<br>4;<br>YMR19<br>3W  | cell organization and biogenesis;metabolic process                                                       | mitochondrion;ribosome                 | RNA binding;structural molecule activity                                       | 1.512      | 0.848      | 0.56 |
| Q05931 | Heat shock protein SSQ1, mitochondrial [OS=Saccharomyces cerevisiae S288c]                                           | 8510<br>84 | SSQ1;<br>YLR369<br>W        | cell organization and biogenesis;metabolic process                                                       | mitochondrion;organelle lumen          | nucleotide binding;protein binding                                             | 0.884      | 0.496      | 0.56 |
| Q06668 | Methyltransferase OMS1, mitochondrial [OS=Saccharomyces cerevisiae S288c]                                            | 8519<br>11 | OMS1;<br>YDR31<br>6W        | metabolic process                                                                                        | membrane;mitochondrion                 | catalytic activity                                                             | 0.693      | 0.389      | 0.56 |
| P37299 | cytochrome b-c1 complex subunit 10 [OS=Saccharomyces cerevisiae S288c]                                               | 8563<br>90 | QCR10;<br>YHR00<br>1W-A     | metabolic process;transport                                                                              | membrane;mitochondrion                 | catalytic activity;transporter activity                                        | 5.31       | 2.981      | 0.56 |
| Q12029 | Probable mitochondrial transport protein fsf1 [OS=Saccharomyces cerevisiae S288c]                                    | 8544<br>45 | FSF1;<br>YOR27<br>1C        | transport                                                                                                | membrane;mitochondrion                 | transporter activity                                                           | 2.36       | 1.336      | 0.57 |
| Q12233 | ATP synthase subunit g, mitochondrial [OS=Saccharomyces cerevisiae S288c]                                            | 8561<br>31 | ATP20;<br>YPR020<br>W       | cell organization and biogenesis;metabolic process;transport                                             | membrane;mitochondrion                 | catalytic activity;transporter activity                                        | 1.371      | 0.778      | 0.57 |
| P36147 | Presequence translocated-associated motor subunit pam17, mitochondrial [OS=Saccharomyces cerevisiae S288c]           | 8539<br>39 | PAM17<br>;<br>YKR065<br>C   | transport                                                                                                | membrane;mitochondrion                 |                                                                                | 1.371      | 0.778      | 0.57 |
| P37292 | Serine hydroxymethyltransferase, mitochondrial [OS=Saccharomyces cerevisiae S288c]                                   | 8525<br>65 | SHM1;<br>YBR263<br>W        | metabolic process                                                                                        | mitochondrion                          | catalytic activity                                                             | 9          | 5.136      | 0.57 |
| P11914 | Mitochondrial-processing peptidase subunit alpha [OS=Saccharomyces cerevisiae S288c]                                 | 8564<br>19 | MAS2;<br>YHR02<br>4C        | metabolic process;transport                                                                              | membrane;mitochondrion;organelle lumen | catalytic activity;metal ion binding;protein binding                           | 1.291      | 0.738      | 0.57 |
| P47052 | succinate dehydrogenase [ubiquinone] flavoprotein subunit 2, mitochondrial [OS=Saccharomyces cerevisiae S288c]       | 8534<br>05 | YJL045<br>W;<br>YJL045<br>W | metabolic process;transport                                                                              | membrane;mitochondrion                 | catalytic activity;nucleotide binding                                          | 4.712      | 2.695      | 0.57 |
| P38771 | Ribosome-recycling factor, mitochondrial [OS=Saccharomyces cerevisiae S288c]                                         | 8564<br>33 | RRF1;<br>YHR03<br>8W        | cell organization and biogenesis;metabolic process                                                       | mitochondrion                          | RNA binding                                                                    | 1.254      | 0.719      | 0.57 |
| Q04935 | Cytochrome c oxidase protein 20, mitochondrial [OS=Saccharomyces cerevisiae S288c]                                   | 8518<br>17 | COX20;<br>YDR23<br>1C       | cell organization and biogenesis;metabolic process                                                       | membrane;mitochondrion                 | protein binding                                                                | 2.455      | 1.424      | 0.58 |
| P04710 | ADP,ATP carrier protein 1 [OS=Saccharomyces cerevisiae S288c]                                                        | 8550<br>78 | AAC1;<br>YMR05<br>6C        | metabolic process;transport                                                                              | cytosol;membrane;mitochondrion         | structural molecule activity;transporter activity                              | 11.74<br>3 | 6.848      | 0.58 |
| P36521 | 54S ribosomal protein L11, mitochondrial [OS=Saccharomyces cerevisiae S288c]                                         | 8513<br>25 | MRPL1<br>1;<br>YDL202<br>W  | cell organization and biogenesis;metabolic process                                                       | mitochondrion;ribosome                 | structural molecule activity                                                   | 1.069      | 0.624      | 0.58 |
| P23641 | mitochondrial phosphate carrier protein [OS=Saccharomyces cerevisiae S288c]                                          | 8535<br>40 | MIR1;<br>YJR077<br>C        | metabolic process;transport                                                                              | membrane;mitochondrion                 | protein binding;structural molecule activity;transporter activity              | 30.62<br>3 | 17.95<br>7 | 0.59 |
| P43635 | Citrate synthase 3, mitochondrial [OS=Saccharomyces cerevisiae S288c]                                                | 8561<br>07 | CIT3;<br>YPR001<br>W        | metabolic process                                                                                        | mitochondrion                          | catalytic activity                                                             | 5.529      | 3.262      | 0.59 |
| P32787 | Mitochondrial genome maintenance protein MGM101 [OS=Saccharomyces cerevisiae S288c]                                  | 8536<br>09 | MGM1<br>01;<br>YJR144       | cell organization and biogenesis;metabolic process;response to stimulus                                  | chromosome;mitochondrion               | DNA binding                                                                    | 3.281      | 1.976      | 0.60 |



|          |                                                                                                          |             |                                           |                                                                                                  |                                                 |                                                                             |            |            |      |
|----------|----------------------------------------------------------------------------------------------------------|-------------|-------------------------------------------|--------------------------------------------------------------------------------------------------|-------------------------------------------------|-----------------------------------------------------------------------------|------------|------------|------|
|          | S288c]                                                                                                   |             | W                                         |                                                                                                  |                                                 |                                                                             |            |            |      |
| P32891   | D-lactate dehydrogenase [cytochrome ] 1, mitochondrial [OS=Saccharomyces cerevisiae S288c]               | 8513<br>80  | DLD1;<br>YDL174<br>C                      | metabolic process;transport                                                                      | membrane;mitochondrion                          | catalytic activity;nucleotide binding                                       | 18.68<br>4 | 11.25<br>3 | 0.60 |
| P00431   | cytochrome c peroxidase, mitochondrial [OS=Saccharomyces cerevisiae S288c]                               | 8539<br>40  | CCP1;<br>YKR066<br>C                      | metabolic process;response to stimulus                                                           | mitochondrion;organelle lumen                   | antioxidant activity;catalytic activity;metal ion binding;protein binding   | 1.424      | 0.859      | 0.60 |
| Q02950   | 37S ribosomal protein MRP51, mitochondrial [OS=Saccharomyces cerevisiae S288c]                           | 8559<br>85  | MRP51<br>;<br>YPL118<br>W                 | cell organization and biogenesis;metabolic process                                               | mitochondrion;ribosome                          | structural molecule activity                                                | 0.668      | 0.407      | 0.61 |
| Q12480   | Probable electron transfer flavoprotein subunit alpha, mitochondrial [OS=Saccharomyces cerevisiae S288c] | 8561<br>12  | AIM45;<br>YPRO04<br>C                     | metabolic process;transport                                                                      | mitochondrion;organelle lumen                   | catalytic activity;nucleotide binding                                       | 2.981      | 1.818      | 0.61 |
| P07806   | Valine--tRNA ligase, mitochondrial [OS=Saccharomyces cerevisiae S288c]                                   | 8529<br>86  | VAS1;<br>YGR09<br>4W                      | metabolic process;regulation of biological process                                               | cytoplasm;cytosol;mitochondrion                 | catalytic activity;nucleotide binding                                       | 0.616      | 0.377      | 0.61 |
| P32331   | Carrier protein YMC1, mitochondrial [OS=Saccharomyces cerevisiae S288c]                                  | 8561<br>71  | YMC1;<br>YPR058<br>W                      | metabolic process;transport                                                                      | membrane;mitochondrion;vacuole                  | structural molecule activity;transporter activity                           | 1.581      | 0.968      | 0.61 |
| P32387   | 54S ribosomal protein L41, mitochondrial [OS=Saccharomyces cerevisiae S288c]                             | 8520<br>14  | MRP20<br>;<br>YDR40<br>5W                 | cell organization and biogenesis;metabolic process                                               | mitochondrion;ribosome                          | nucleotide binding;protein binding;RNA binding;structural molecule activity | 1.581      | 0.968      | 0.61 |
| Q08179   | Mitochondrial distribution and morphology protein 38 [OS=Saccharomyces cerevisiae S288c]                 | 8541<br>30  | MDM3<br>8;<br>YOL027<br>C                 | cell organization and biogenesis;cellular homeostasis;regulation of biological process;transport | membrane;mitochondrion                          |                                                                             | 6.079      | 3.732      | 0.61 |
| P43616   | Cys-Gly metallodipeptidase dug1 [OS=Saccharomyces cerevisiae S288c]                                      | 8506<br>05  | DUG1;<br>YFR044<br>C                      | metabolic process                                                                                | cytoplasm;mitochondrion;ribosome                | catalytic activity;metal ion binding                                        | 1.154      | 0.711      | 0.62 |
| P05626   | ATP synthase subunit 4, mitochondrial [OS=Saccharomyces cerevisiae S288c]                                | 8560<br>27  | ATP4;<br>YPL078<br>C                      | cell organization and biogenesis;metabolic process;transport                                     | membrane;mitochondrion                          | catalytic activity;transporter activity                                     | 4.995      | 3.084      | 0.62 |
| P38172   | MIOREX complex component 3 [OS=Saccharomyces cerevisiae S288c]                                           | 8521<br>81  | YBL095<br>W;<br>MRX3;<br>YBL095<br>W      |                                                                                                  | membrane;mitochondrion                          |                                                                             | 0.501      | 0.311      | 0.62 |
| P27697   | Atypical kinase COQ8, mitochondrial [OS=Saccharomyces cerevisiae S288c]                                  | 8527<br>58  | COQ8;<br>YGL119<br>W                      | metabolic process                                                                                | membrane;mitochondrion;organelle lumen          | catalytic activity;nucleotide binding                                       | 0.453      | 0.283      | 0.62 |
| Q3E824   | Uncharacterized protein YOR020W-A [OS=Saccharomyces cerevisiae S288c]                                    | 1466<br>480 | YOR02<br>0W-A;<br>YOR02<br>0W-A           | metabolic process;transport                                                                      | membrane;mitochondrion                          |                                                                             | 5.813      | 3.642      | 0.63 |
| P19414   | Aconitate hydratase, mitochondrial [OS=Saccharomyces cerevisiae S288c]                                   | 8510<br>13  | ACO1;<br>YLR304<br>C                      | cell organization and biogenesis;metabolic process;transport                                     | cytoplasm;cytosol;mitochondrion;organelle lumen | catalytic activity;DNA binding;metal ion binding                            | 48.61<br>9 | 30.62<br>3 | 0.63 |
| P15179   | Aspartate--tRNA ligase, mitochondrial [OS=Saccharomyces cerevisiae S288c]                                | 8560<br>00  | MSD1;<br>YPL104<br>W                      | metabolic process                                                                                | cytoplasm;mitochondrion;organelle lumen         | catalytic activity;nucleotide binding                                       | 0.379      | 0.239      | 0.63 |
| P47127   | Altered inheritance of mitochondria protein 24, mitochondrial [OS=Saccharomyces cerevisiae S288c]        | 8535<br>43  | AIM24;<br>YJR080<br>C                     | cell organization and biogenesis                                                                 | mitochondrion                                   |                                                                             | 2.857      | 1.807      | 0.63 |
| P38072   | Protein SCO2, mitochondrial [OS=Saccharomyces cerevisiae S288c]                                          | 8523<br>12  | SCO2;<br>YBR024<br>W                      | cell organization and biogenesis;cellular homeostasis;metabolic process;transport                | membrane;mitochondrion                          | antioxidant activity;catalytic activity;metal ion binding                   | 1.154      | 0.73       | 0.63 |
| Q05648   | MIOREX complex component 10 [OS=Saccharomyces cerevisiae S288c]                                          | 8518<br>76  | YDR28<br>2C;<br>MRX10<br>;<br>YDR28<br>2C |                                                                                                  | membrane;mitochondrion                          |                                                                             | 0.35       | 0.222      | 0.63 |
| P32191   | Glycerol-3-phosphate dehydrogenase, mitochondrial [OS=Saccharomyces cerevisiae S288c]                    | 8546<br>51  | GUT2;<br>YIL155<br>C                      | metabolic process                                                                                | membrane;mitochondrion                          | catalytic activity                                                          | 8.522      | 5.434      | 0.64 |
| Q01532-1 | Cysteine proteinase 1, mitochondrial [OS=Saccharomyces cerevisiae S288c]                                 |             |                                           | metabolic process;regulation of biological process;response to stimulus                          | cytoplasm;mitochondrion                         | catalytic activity;DNA binding;RNA binding                                  | 0.28       | 0.179      | 0.64 |
| P38705   | Serine--tRNA ligase, mitochondrial [OS=Saccharomyces cerevisiae S288c]                                   | 8564<br>02  | DIA4;<br>YHR01<br>1W                      | metabolic process                                                                                | cytoplasm;mitochondrion;organelle lumen         | catalytic activity;nucleotide binding                                       | 0.233      | 0.15       | 0.64 |
| P07236   | Threonine--tRNA ligase, mitochondrial [OS=Saccharomyces cerevisiae S288c]                                | 8536<br>40  | MST1;<br>YKL194<br>C                      | metabolic process                                                                                | cytoplasm;mitochondrion;organelle lumen         | catalytic activity;nucleotide binding;RNA binding                           | 0.233      | 0.15       | 0.64 |
| P42900   | Sigma-like sequence protein 1,                                                                           | 8508        | SLS1;                                     | cell organization and                                                                            | membrane;mitochondrion                          | protein binding                                                             | 0.194      | 0.125      | 0.64 |

|        |                                                                                                    |         |                          |                                                                                     |                                              |                                                                                     |         |         |      |
|--------|----------------------------------------------------------------------------------------------------|---------|--------------------------|-------------------------------------------------------------------------------------|----------------------------------------------|-------------------------------------------------------------------------------------|---------|---------|------|
|        | mitochondrial [OS=Saccharomyces cerevisiae S288c]                                                  | 30      | YLR139 C                 | biogenesis;metabolic process                                                        |                                              |                                                                                     |         |         |      |
| P53166 | ATP-dependent RNA helicase mrh4, mitochondrial [OS=Saccharomyces cerevisiae S288c]                 | 8528 16 | MRH4; YGL064 C           | cell organization and biogenesis;metabolic process                                  | mitochondrion;organelle lumen                | catalytic activity;nucleotide binding;RNA binding                                   | 0.225   | 0.145   | 0.64 |
| P25349 | Flavoprotein-like protein YCP4 [OS=Saccharomyces cerevisiae S288c]                                 | 8503 60 | YCP4; YCR004 C           | metabolic process;regulation of biological process                                  | cytoplasm;membrane;mitochondrion             | catalytic activity;nucleotide binding;protein binding                               | 9       | 5.813   | 0.65 |
| P38088 | Glycine--tRNA ligase 1, mitochondrial [OS=Saccharomyces cerevisiae S288c]                          |         |                          | metabolic process                                                                   | cytoplasm;mitochondrion;organelle lumen      | catalytic activity;nucleotide binding;protein binding                               | 0.616   | 0.399   | 0.65 |
| P08466 | mitochondrial nuclease [OS=Saccharomyces cerevisiae S288c]                                         | 8532 22 | NUC1; YJL208 C           | cell death;metabolic process                                                        | membrane;mitochondrion;nucleus               | catalytic activity;metal ion binding                                                | 1.637   | 1.069   | 0.65 |
| P07275 | Delta-1-pyrroline-5-carboxylate dehydrogenase, mitochondrial [OS=Saccharomyces cerevisiae S288c]   | 8564 32 | PUT2; YHR03 7W           | metabolic process                                                                   | membrane;mitochondrion;organelle lumen       | catalytic activity                                                                  | 6.055   | 3.977   | 0.66 |
| Q04728 | Arginine biosynthesis bifunctional protein Arg1, mitochondrial [OS=Saccharomyces cerevisiae S288c] | 8550 84 | ARG7; YMR06 2C           | metabolic process                                                                   | mitochondrion;organelle lumen                | catalytic activity                                                                  | 0.63    | 0.417   | 0.66 |
| Q06143 | mitochondrial dicarboxylate transporter [OS=Saccharomyces cerevisiae S288c]                        | 8510 63 | DIC1; YLR348 C           | metabolic process;transport                                                         | membrane;mitochondrion                       | structural molecule activity;transporter activity                                   | 1.404   | 0.931   | 0.66 |
| P40047 | Aldehyde dehydrogenase 5, mitochondrial [OS=Saccharomyces cerevisiae S288c]                        | 8568 04 | ALD5; YER073 W           | metabolic process                                                                   | mitochondrion;organelle lumen                | catalytic activity                                                                  | 2.384   | 1.581   | 0.66 |
| Q07349 | MIOREX complex component 9 [OS=Saccharomyces cerevisiae S288c]                                     | 8515 35 | YDL027 C; MRX9; YDL027 C |                                                                                     | endoplasmic reticulum;membrane;mitochondrion |                                                                                     | 1.913   | 1.276   | 0.67 |
| P38910 | 10 kDa heat shock protein, mitochondrial [OS=Saccharomyces cerevisiae S288c]                       | 8541 85 | HSP10; YOR02 0C          | cell organization and biogenesis;metabolic process;response to stimulus;transport   | cytoplasm;mitochondrion;organelle lumen      | metal ion binding;nucleotide binding;protein binding                                | 3.217   | 2.162   | 0.67 |
| P21954 | Isocitrate dehydrogenase [NADP], mitochondrial [OS=Saccharomyces cerevisiae S288c]                 | 8514 93 | IDP1; YDL066 W           | metabolic process                                                                   | mitochondrion                                | catalytic activity;metal ion binding;nucleotide binding;protein binding             | 38.81 1 | 26.12 3 | 0.67 |
| P38325 | Mitochondrial outer membrane protein OM14 [OS=Saccharomyces cerevisiae S288c]                      | 8525 31 | OM14; YBR230 C           | transport                                                                           | membrane;mitochondrion                       |                                                                                     | 6.197   | 4.179   | 0.67 |
| P28834 | Isocitrate dehydrogenase [NAD] subunit 1, mitochondrial [OS=Saccharomyces cerevisiae S288c]        | 8556 91 | IDH1; YNL037 C           | metabolic process;transport                                                         | cytosol;mitochondrion;organelle lumen        | catalytic activity;metal ion binding;nucleotide binding;protein binding;RNA binding | 15.23 8 | 10.28 8 | 0.68 |
| P50085 | Prohibitin-2 [OS=Saccharomyces cerevisiae S288c]                                                   | 8531 46 | PHB2; YGR23 1C           | cell organization and biogenesis;metabolic process;regulation of biological process | membrane;mitochondrion                       | protein binding                                                                     | 4.926   | 3.329   | 0.68 |
| Q12482 | Mitochondrial aspartate-glutamate transporter AGC1 [OS=Saccharomyces cerevisiae S288c]             | 8561 32 | AGC1; YPR021 C           | metabolic process;transport                                                         | membrane;mitochondrion                       | structural molecule activity;transporter activity                                   | 0.348   | 0.238   | 0.68 |
| P16622 | Ferrochelatase, mitochondrial [OS=Saccharomyces cerevisiae S288c]                                  | 8543 47 | HEM15 ; YOR17 6W         | metabolic process                                                                   | membrane;mitochondrion                       | catalytic activity                                                                  | 6.305   | 4.337   | 0.69 |
| Q02776 | Mitochondrial import inner membrane translocase subunit TIM50 [OS=Saccharomyces cerevisiae S288c]  | 8560 42 | TIM50; YPL063 W          | cell organization and biogenesis;metabolic process;transport                        | membrane;mitochondrion                       | catalytic activity;protein binding;transporter activity                             | 9       | 6.197   | 0.69 |
| P36013 | NAD-dependent malic enzyme, mitochondrial [OS=Saccharomyces cerevisiae S288c]                      | 8538 39 | MAE1; YKL029 C           | metabolic process                                                                   | mitochondrion;organelle lumen                | catalytic activity;metal ion binding;nucleotide binding                             | 1.985   | 1.371   | 0.69 |
| P00560 | Phosphoglycerate kinase [OS=Saccharomyces cerevisiae S288c]                                        | 8503 70 | PGK1; YCR012 W           | metabolic process                                                                   | cytoplasm;membrane;mitochondrion             | catalytic activity;nucleotide binding                                               | 6.356   | 4.412   | 0.69 |
| Q03430 | 37S ribosomal protein RSM28, mitochondrial [OS=Saccharomyces cerevisiae S288c]                     | 8521 05 | RSM28 ; YDR49 4W         | cell organization and biogenesis;metabolic process                                  | mitochondrion;ribosome                       | structural molecule activity                                                        | 1.462   | 1.015   | 0.69 |
| P42940 | Probable electron transfer flavoprotein subunit beta [OS=Saccharomyces cerevisiae S288c]           | 8531 21 | CIR1; YGR20 7C           | metabolic process;transport                                                         | mitochondrion;organelle lumen                |                                                                                     | 4.623   | 3.217   | 0.70 |
| P38300 | Inner membrane mitoribosome receptor MBA1, mitochondrial [OS=Saccharomyces cerevisiae S288c]       | 8524 83 | MBA1; YBR185 C           | cell organization and biogenesis;regulation of biological process                   | membrane;mitochondrion                       |                                                                                     | 0.585   | 0.413   | 0.71 |

|          |                                                                                                        |            |                                |                                                                                                                                                            |                                                |                                                                                 |            |            |      |
|----------|--------------------------------------------------------------------------------------------------------|------------|--------------------------------|------------------------------------------------------------------------------------------------------------------------------------------------------------|------------------------------------------------|---------------------------------------------------------------------------------|------------|------------|------|
| Q03104   | Meiotic sister chromatid recombination protein 1 [OS=Saccharomyces cerevisiae S288c]                   | 8549<br>11 | MSC1;<br>YML12<br>8C           | metabolic process                                                                                                                                          | endoplasmic reticulum;membrane;mitochondrion   |                                                                                 | 2.415      | 1.712      | 0.71 |
| P48015   | Aminomethyltransferase, mitochondrial [OS=Saccharomyces cerevisiae S288c]                              | 8515<br>82 | GCV1;<br>YDR01<br>9C           | metabolic process                                                                                                                                          | mitochondrion                                  | catalytic activity;protein binding                                              | 9          | 6.406      | 0.71 |
| P17505   | Malate dehydrogenase, mitochondrial [OS=Saccharomyces cerevisiae S288c]                                | 8537<br>77 | MDH1;<br>YKL085<br>W           | metabolic process                                                                                                                                          | mitochondrion;organelle lumen                  | catalytic activity;protein binding;RNA binding                                  | 56.79<br>7 | 40.59<br>6 | 0.71 |
| P32340   | Rotenone-insensitive NADH-ubiquinone oxidoreductase, mitochondrial [OS=Saccharomyces cerevisiae S288c] | 8549<br>19 | NDI1;<br>YML12<br>0C           | metabolic process;regulation of biological process                                                                                                         | membrane;mitochondrion;organelle lumen         | catalytic activity;nucleotide binding                                           | 24.92<br>9 | 17.87<br>4 | 0.72 |
| POCS90   | Heat shock protein SSC1, mitochondrial [OS=Saccharomyces cerevisiae S288c]                             | 8535<br>03 | SSC1;<br>YJR045<br>C           | cell organization and biogenesis;metabolic process;regulation of biological process;transport                                                              | membrane;mitochondrion;nucleus;organelle lumen | catalytic activity;enzyme regulator activity;nucleotide binding;protein binding | 48.48<br>2 | 34.93<br>8 | 0.72 |
| P04807   | Hexokinase-2 [OS=Saccharomyces cerevisiae S288c]                                                       | 8526<br>39 | HXK2;<br>YGL253<br>W           | cell communication;cell organization and biogenesis;cellular homeostasis;metabolic process;regulation of biological process;response to stimulus;transport | cytosol;mitochondrion;nucleus                  | catalytic activity;nucleotide binding                                           | 0.359      | 0.259      | 0.72 |
| P09440   | C-1-tetrahydrofolate synthase, mitochondrial [OS=Saccharomyces cerevisiae S288c]                       | 8523<br>78 | MIS1;<br>YBR084<br>W           | metabolic process                                                                                                                                          | cytosol;mitochondrion                          | catalytic activity;nucleotide binding                                           | 1.049      | 0.762      | 0.73 |
| P39726   | Glycine cleavage system H protein, mitochondrial [OS=Saccharomyces cerevisiae S288c]                   | 8512<br>54 | GCV3;<br>YAL044<br>C           | metabolic process                                                                                                                                          | mitochondrion                                  | catalytic activity                                                              | 4.995      | 3.642      | 0.73 |
| P54783   | D-arabinono-1,4-lactone oxidase [OS=Saccharomyces cerevisiae S288c]                                    | 8548<br>88 | ALO1;<br>YML08<br>6C           | metabolic process;response to stimulus                                                                                                                     | membrane;mitochondrion                         | catalytic activity;nucleotide binding                                           | 3.299      | 2.415      | 0.73 |
| P39518   | Long-chain-fatty-acid-CoA ligase 2 [OS=Saccharomyces cerevisiae S288c]                                 | 8567<br>34 | FAA2;<br>YER015<br>W           | metabolic process;transport                                                                                                                                | cytoplasm;mitochondrion                        | catalytic activity;nucleotide binding                                           | 0.619      | 0.455      | 0.74 |
| P52893   | probable alanine aminotransferase, mitochondrial [OS=Saccharomyces cerevisiae S288c]                   | 8507<br>78 | ALT1;<br>YLR089<br>C           | metabolic process                                                                                                                                          | mitochondrion;organelle lumen                  | catalytic activity                                                              | 1.102      | 0.812      | 0.74 |
| P32796-1 | Carnitine O-acetyltransferase, mitochondrial [OS=Saccharomyces cerevisiae S288c]                       | 8549<br>65 | CAT2;<br>YML04<br>2W           | metabolic process;transport                                                                                                                                | membrane;mitochondrion                         | catalytic activity                                                              | 13.81<br>6 | 10.18<br>9 | 0.74 |
| Q99297   | Mitochondrial 2-oxodicarboxylate carrier 2 [OS=Saccharomyces cerevisiae S288c]                         | 8543<br>97 | ODC2;<br>YOR22<br>2W           | metabolic process;transport                                                                                                                                | membrane;mitochondrion                         | structural molecule activity;transporter activity                               | 1.054      | 0.778      | 0.74 |
| P28625   | Protein YIM1 [OS=Saccharomyces cerevisiae S288c]                                                       | 8551<br>83 | YIM1;<br>YMR15<br>2W           | metabolic process;response to stimulus                                                                                                                     | cytoplasm;endoplasmic reticulum;mitochondrion  | catalytic activity;metal ion binding                                            | 0.833      | 0.624      | 0.75 |
| P23180   | Probable oxidoreductase AIM17 [OS=Saccharomyces cerevisiae S288c]                                      | 8563<br>65 | AIM17;<br>YHL021<br>C          | cell organization and biogenesis;metabolic process                                                                                                         | mitochondrion                                  | catalytic activity;metal ion binding                                            | 4.623      | 3.467      | 0.75 |
| P36534   | 54S ribosomal protein L40, mitochondrial [OS=Saccharomyces cerevisiae S288c]                           | 8559<br>30 | MRPL4<br>0;<br>YPL173<br>W     | cell organization and biogenesis;metabolic process                                                                                                         | mitochondrion;ribosome                         | protein binding;structural molecule activity                                    | 0.778      | 0.585      | 0.75 |
| P33759   | 37S ribosomal protein S5, mitochondrial [OS=Saccharomyces cerevisiae S288c]                            | 8525<br>53 | MRPS5<br>;<br>YBR251<br>W      | cell organization and biogenesis;metabolic process                                                                                                         | mitochondrion;ribosome                         | RNA binding;structural molecule activity                                        | 0.778      | 0.585      | 0.75 |
| P50087   | MICOS subunit MIC26 [OS=Saccharomyces cerevisiae S288c]                                                | 8531<br>50 | MOS2;<br>MIC26;<br>YGR23<br>5C | cell organization and biogenesis                                                                                                                           | membrane;mitochondrion                         |                                                                                 | 1.683      | 1.276      | 0.76 |
| P32902   | 37S ribosomal protein MRP4, mitochondrial [OS=Saccharomyces cerevisiae S288c]                          | 8563<br>84 | MRP4;<br>YHL004<br>W           | cell organization and biogenesis;metabolic process                                                                                                         | mitochondrion;ribosome                         | structural molecule activity                                                    | 0.616      | 0.468      | 0.76 |
| P07257   | Cytochrome b-c1 complex subunit 2, mitochondrial [OS=Saccharomyces cerevisiae S288c]                   | 8563<br>21 | QCR2;<br>YPR191<br>W           | metabolic process;transport                                                                                                                                | membrane;mitochondrion                         | catalytic activity;metal ion binding;protein binding;transporter activity       | 36.75<br>1 | 27.94<br>3 | 0.76 |
| P32473   | Pyruvate dehydrogenase E1 component subunit beta, mitochondrial [OS=Saccharomyces cerevisiae S288c]    | 8525<br>22 | PDB1;<br>YBR221<br>C           | metabolic process                                                                                                                                          | mitochondrion;organelle lumen                  | catalytic activity                                                              | 9          | 6.848      | 0.76 |
| P54003   | Protein SUR7 [OS=Saccharomyces cerevisiae S288c]                                                       | 8549<br>53 | SUR7;<br>YML05<br>2W           | cell differentiation;transport                                                                                                                             | membrane;mitochondrion                         |                                                                                 | 1.512      | 1.154      | 0.76 |
| P53598   | Succinyl-CoA ligase [ADP-forming] subunit alpha, mitochondrial [OS=Saccharomyces cerevisiae S288c]     | 8543<br>10 | LSC1;<br>YOR14<br>2W           | metabolic process                                                                                                                                          | cytosol;mitochondrion                          | catalytic activity;nucleotide binding                                           | 11.74<br>3 | 9          | 0.77 |
| Q02981   | ABC1 family protein YPL109C, mitochondrial [OS=Saccharomyces cerevisiae S288c]                         | 8559<br>95 | YPL109<br>C;<br>YPL109<br>C    |                                                                                                                                                            | mitochondrion                                  |                                                                                 | 0.334      | 0.259      | 0.78 |

|        |                                                                                                              |        |                      |                                                                                   |                                                  |                                                                         |         |         |      |
|--------|--------------------------------------------------------------------------------------------------------------|--------|----------------------|-----------------------------------------------------------------------------------|--------------------------------------------------|-------------------------------------------------------------------------|---------|---------|------|
| P23644 | Mitochondrial import receptor subunit TOM40 [OS=Saccharomyces cerevisiae S288c]                              | 855243 | TOM40 ; YMR203W      | transport                                                                         | cytosol;membrane;mitochondrion                   | protein binding;transporter activity                                    | 1.154   | 0.896   | 0.78 |
| Q00711 | Succinate dehydrogenase [ubiquinone] flavoprotein subunit, mitochondrial [OS=Saccharomyces cerevisiae S288c] | 853709 | SDH1; YKL148C        | metabolic process;transport                                                       | membrane;mitochondrion                           | catalytic activity;nucleotide binding;protein binding                   | 12.242  | 9.578   | 0.78 |
| P16451 | Pyruvate dehydrogenase complex protein X component, mitochondrial [OS=Saccharomyces cerevisiae S288c]        | 853107 | PDX1; YGR193C        | metabolic process                                                                 | mitochondrion;organelle lumen                    | catalytic activity;structural molecule activity                         | 2.594   | 2.03    | 0.78 |
| P38891 | Branched-chain-amino-acid aminotransferase, mitochondrial [OS=Saccharomyces cerevisiae S288c]                | 856615 | BAT1; YHR208W        | metabolic process;regulation of biological process;response to stimulus           | mitochondrion;organelle lumen                    | catalytic activity                                                      | 9       | 7.111   | 0.79 |
| P07213 | Mitochondrial import receptor subunit TOM70 [OS=Saccharomyces cerevisiae S288c]                              | 855602 | TOM70 ; YNL121C      | cell organization and biogenesis;transport                                        | membrane;mitochondrion                           | protein binding;transporter activity                                    | 3.642   | 2.888   | 0.79 |
| P32611 | 54S ribosomal protein RML2, mitochondrial [OS=Saccharomyces cerevisiae S288c]                                | 856660 | RML2; YEL050C        | cell organization and biogenesis;metabolic process                                | mitochondrion;ribosome                           | catalytic activity;RNA binding;structural molecule activity             | 0.638   | 0.509   | 0.80 |
| P40215 | External NADH-ubiquinone oxidoreductase 1, mitochondrial [OS=Saccharomyces cerevisiae S288c]                 | 855176 | NDE1; YMR145C        | metabolic process                                                                 | mitochondrion                                    | catalytic activity;nucleotide binding                                   | 5.469   | 4.367   | 0.80 |
| Q08223 | Altered inheritance of mitochondria protein 39, mitochondrial [OS=Saccharomyces cerevisiae S288c]            | 854103 | AIM39; YOL053W       |                                                                                   | cytosol;membrane;mitochondrion                   |                                                                         | 0.585   | 0.468   | 0.80 |
| P32453 | Protein ATP11, mitochondrial [OS=Saccharomyces cerevisiae S288c]                                             | 855401 | ATP11; YNL315C       | cell organization and biogenesis                                                  | mitochondrion                                    | protein binding                                                         | 1.239   | 0.995   | 0.80 |
| Q03976 | 37S ribosomal protein S24, mitochondrial [OS=Saccharomyces cerevisiae S288c]                                 | 851755 | RSM24 ; YDR175C      | cell organization and biogenesis;metabolic process                                | mitochondrion;ribosome                           | structural molecule activity                                            | 0.905   | 0.738   | 0.82 |
| P30902 | ATP synthase subunit d, mitochondrial [OS=Saccharomyces cerevisiae S288c]                                    | 853853 | ATP7; YKL016C        | metabolic process;transport                                                       | membrane;mitochondrion                           | catalytic activity;transporter activity                                 | 5.105   | 4.179   | 0.82 |
| P38825 | Protein TOM71 [OS=Saccharomyces cerevisiae S288c]                                                            | 856517 | TOM71 ; YHR117W      | transport                                                                         | membrane;mitochondrion                           | protein binding;transporter activity                                    | 0.512   | 0.425   | 0.83 |
| P07143 | Cytochrome c1, heme protein, mitochondrial [OS=Saccharomyces cerevisiae S288c]                               | 854231 | CYT1; YOR065W        | metabolic process;transport                                                       | cytosol;membrane;mitochondrion                   | metal ion binding                                                       | 23.245  | 19.309  | 0.83 |
| Q12166 | 2-isopropylmalate synthase 2, mitochondrial [OS=Saccharomyces cerevisiae S288c]                              | 854275 | LEU9; YOR108W        | metabolic process                                                                 | mitochondrion                                    | catalytic activity;protein binding                                      | 2.472   | 2.065   | 0.84 |
| P36112 | MICOS complex subunit Mic60 [OS=Saccharomyces cerevisiae S288c]                                              | 853886 | FCJ1; MIC60; YKR016W | cell organization and biogenesis;transport                                        | membrane;mitochondrion                           |                                                                         | 15.379  | 12.895  | 0.84 |
| P53266 | Cytochrome oxidase assembly protein SHY1 [OS=Saccharomyces cerevisiae S288c]                                 | 853009 | SHY1; YGR112W        | cell organization and biogenesis                                                  | membrane;mitochondrion                           | protein binding                                                         | 1.154   | 0.978   | 0.85 |
| Q03028 | Mitochondrial 2-oxodicarboxylate carrier 1 [OS=Saccharomyces cerevisiae S288c]                               | 855969 | ODC1; YPL134C        | metabolic process;transport                                                       | membrane;mitochondrion                           | structural molecule activity;transporter activity                       | 5.813   | 4.995   | 0.86 |
| P40341 | Mitochondrial respiratory chain complexes assembly protein YTA12 [OS=Saccharomyces cerevisiae S288c]         | 855114 | YTA12; YMR089C       | cell organization and biogenesis;metabolic process;response to stimulus;transport | cytoplasm;membrane;mitochondrion                 | catalytic activity;metal ion binding;nucleotide binding;protein binding | 1.371   | 1.184   | 0.86 |
| P36060 | NADH-cytochrome b5 reductase 2 [OS=Saccharomyces cerevisiae S288c]                                           | 853707 | MCR1; YKL150W        | metabolic process;response to stimulus                                            | membrane;mitochondrion                           | catalytic activity;protein binding                                      | 15.238  | 13.384  | 0.88 |
| P00359 | Glyceraldehyde-3-phosphate dehydrogenase 3 [OS=Saccharomyces cerevisiae S288c]                               | 853106 | TDH3; YGR192C        | cell death;metabolic process                                                      | cytoplasm;cytosol;membrane;mitochondrion;nucleus | catalytic activity;nucleotide binding;RNA binding                       | 7.185   | 6.406   | 0.89 |
| P38077 | ATP synthase subunit gamma, mitochondrial [OS=Saccharomyces cerevisiae S288c]                                | 852327 | ATP3; YBR039W        | metabolic process;transport                                                       | membrane;mitochondrion                           | catalytic activity;transporter activity                                 | 12.689  | 11.328  | 0.89 |
| P18239 | ADP,ATP carrier protein 2 [OS=Saccharomyces cerevisiae S288c]                                                | 852250 | PET9; YBL030C        | cell death;metabolic process;transport                                            | membrane;mitochondrion                           | structural molecule activity;transporter activity                       | 110.034 | 110.034 | 1.00 |
| P06168 | ketol-acid reductoisomerase, mitochondrial [OS=Saccharomyces cerevisiae S288c]                               | 851069 | ILV5; YLR355C        | cell organization and biogenesis;metabolic process                                | mitochondrion                                    | catalytic activity;DNA binding;metal ion binding                        | 12.895  | 12.895  | 1.00 |
| P07342 | Acetolactate synthase catalytic subunit, mitochondrial [OS=Saccharomyces cerevisiae S288c]                   | 855135 | ILV2; YMR108W        | metabolic process                                                                 | mitochondrion                                    | catalytic activity;metal ion binding;nucleotide binding                 | 4.223   | 4.223   | 1.00 |

|        |                                                                                                   |            |                                 |                                                                         |                                                      |                                                                     |       |       |      |
|--------|---------------------------------------------------------------------------------------------------|------------|---------------------------------|-------------------------------------------------------------------------|------------------------------------------------------|---------------------------------------------------------------------|-------|-------|------|
| P09457 | ATP synthase subunit 5, mitochondrial [OS=Saccharomyces cerevisiae S288c]                         | 8518<br>92 | ATP5;<br>YDR29<br>8C            | metabolic process;transport                                             | membrane;mitochondrion                               | catalytic activity;transporter activity                             | 9     | 9     | 1.00 |
| P00358 | glyceraldehyde-3-phosphate dehydrogenase 2 [OS=Saccharomyces cerevisiae S288c]                    | 8534<br>65 | TDH2;<br>YJR009<br>C            | cell death;metabolic process                                            | cytoplasm;cytosol;membrane;mitochondrion;nucleus     | catalytic activity;nucleotide binding;protein binding               | 3.962 | 3.962 | 1.00 |
| P15108 | ATP-dependent molecular chaperone HSC82 [OS=Saccharomyces cerevisiae S288c]                       | 8552<br>24 | HSC82;<br>YMR18<br>6W           | cell organization and biogenesis;metabolic process;response to stimulus | cytoplasm;membrane;mitochondrion                     | catalytic activity;nucleotide binding                               | 1.081 | 1.081 | 1.00 |
| Q04013 | Citrate/oxoglutarate carrier protein [OS=Saccharomyces cerevisiae S288c]                          | 8552<br>82 | YHM2;<br>YMR24<br>1W            | cell organization and biogenesis;metabolic process;transport            | membrane;mitochondrion                               | DNA binding;structural molecule activity;transporter activity       | 3.467 | 3.467 | 1.00 |
| P32897 | Mitochondrial import inner membrane translocase subunit tim23 [OS=Saccharomyces cerevisiae S288c] | 8557<br>51 | TIM23;<br>YNR01<br>7W           | transport                                                               | membrane;mitochondrion                               | protein binding;transporter activity                                | 2.981 | 2.981 | 1.00 |
| P00044 | Cytochrome c iso-1 [OS=Saccharomyces cerevisiae S288c]                                            | 8535<br>07 | CYC1;<br>YJR048<br>W            | metabolic process;transport                                             | mitochondrion                                        | metal ion binding;protein binding                                   | 9     | 9     | 1.00 |
| P40185 | Protein mmf1, mitochondrial [OS=Saccharomyces cerevisiae S288c]                                   | 8547<br>60 | MMF1;<br>YIL051<br>C            | cell organization and biogenesis;metabolic process                      | mitochondrion;organelle lumen                        |                                                                     | 5.31  | 5.31  | 1.00 |
| P53721 | Respiratory supercomplex factor 2, mitochondrial [OS=Saccharomyces cerevisiae S288c]              | 8557<br>52 | RCF2;<br>YNR01<br>8W            | cell organization and biogenesis                                        | membrane;mitochondrion                               |                                                                     | 5.579 | 5.579 | 1.00 |
| P00424 | Cytochrome c oxidase polypeptide 5A, mitochondrial [OS=Saccharomyces cerevisiae S288c]            | 8556<br>75 | COX5A;<br>YNL052<br>W           | metabolic process;transport                                             | membrane;mitochondrion                               | catalytic activity;transporter activity                             | 2.511 | 2.511 | 1.00 |
| P40582 | Glutathione S-transferase 1 [OS=Saccharomyces cerevisiae S288c]                                   | 8548<br>56 | GTT1;<br>YIR038<br>C            | metabolic process                                                       | endoplasmic reticulum;membrane;mitochondrion;nucleus | antioxidant activity;catalytic activity;protein binding;RNA binding | 1.683 | 1.683 | 1.00 |
| P40508 | Uncharacterized protein YIL077C [OS=Saccharomyces cerevisiae S288c]                               | 8547<br>33 | YIL077<br>C;<br>YIL077<br>C     |                                                                         | mitochondrion                                        |                                                                     | 0.896 | 0.896 | 1.00 |
| Q02204 | 54S ribosomal protein L13, mitochondrial [OS=Saccharomyces cerevisiae S288c]                      | 8538<br>75 | MRPL1<br>3;<br>YKR006<br>C      | cell organization and biogenesis;metabolic process                      | mitochondrion;ribosome                               | structural molecule activity                                        | 1.054 | 1.054 | 1.00 |
| P22136 | ATPase expression protein 2, mitochondrial [OS=Saccharomyces cerevisiae S288c]                    | 8553<br>25 | AEP2;<br>YMR28<br>2C            | metabolic process;regulation of biological process                      | mitochondrion                                        | RNA binding                                                         | 0.292 | 0.292 | 1.00 |
| P50945 | MICOS complex subunit MIC27 [OS=Saccharomyces cerevisiae S288c]                                   | 8556<br>23 | AIM37;<br>MIC27;<br>YNL100<br>W | cell organization and biogenesis                                        | membrane;mitochondrion                               |                                                                     | 0.968 | 0.968 | 1.00 |
| Q06493 | LETM1 domain-containing protein YLH47, mitochondrial [OS=Saccharomyces cerevisiae S288c]          | 8562<br>43 | YLH47;<br>YPR125<br>W           | cell organization and biogenesis;transport                              | membrane;mitochondrion                               |                                                                     | 0.61  | 0.61  | 1.00 |
| P42847 | 37S ribosomal protein S18, mitochondrial [OS=Saccharomyces cerevisiae S288c]                      | 8554<br>10 | MRP51<br>8;<br>YNL306<br>W      | cell organization and biogenesis;metabolic process                      | mitochondrion;ribosome                               | RNA binding;structural molecule activity                            | 0.54  | 0.54  | 1.00 |
| P21771 | 37S ribosomal protein S28, mitochondrial [OS=Saccharomyces cerevisiae S288c]                      | 8519<br>37 | MRP52<br>8;<br>YDR33<br>7W      | cell organization and biogenesis;metabolic process                      | mitochondrion;ribosome                               | RNA binding;structural molecule activity                            | 0.438 | 0.438 | 1.00 |
| Q03201 | 37S ribosomal protein S10, mitochondrial [OS=Saccharomyces cerevisiae S288c]                      | 8516<br>11 | RSM10<br>;<br>YDR04<br>1W       | cell organization and biogenesis;metabolic process                      | mitochondrion;ribosome                               | structural molecule activity                                        | 0.701 | 0.701 | 1.00 |
| Q07914 | mitochondrial import inner membrane translocase subunit TIM14 [OS=Saccharomyces cerevisiae S288c] | 8506<br>94 | PAM18<br>;<br>YLR008<br>C       | regulation of biological process;transport                              | membrane;mitochondrion                               | enzyme regulator activity;protein binding;transporter activity      | 0.778 | 0.778 | 1.00 |
| P25345 | Asparagine-tRNA ligase, mitochondrial [OS=Saccharomyces cerevisiae S288c]                         | 8503<br>88 | SLM5;<br>YCR024<br>C            | metabolic process                                                       | cytoplasm;mitochondrion;organelle lumen              | catalytic activity;nucleotide binding                               | 0.172 | 0.172 | 1.00 |
| P21375 | Fumarate reductase 2 [OS=Saccharomyces cerevisiae S288c]                                          | 8535<br>10 | OSM1;<br>YJR051<br>W            | metabolic process                                                       | endoplasmic reticulum;mitochondrion                  | catalytic activity;nucleotide binding                               | 0.25  | 0.25  | 1.00 |
| P25038 | Translation initiation factor IF-2, mitochondrial [OS=Saccharomyces cerevisiae S288c]             | 8541<br>35 | IFM1;<br>YOL023<br>W            | cell organization and biogenesis;metabolic process                      | mitochondrion;nucleus                                | catalytic activity;nucleotide binding;RNA binding                   | 0.11  | 0.11  | 1.00 |
| Q06005 | Octanoyltransferase, mitochondrial [OS=Saccharomyces cerevisiae S288c]                            | 8509<br>40 | LIP2;<br>YLR239<br>C            | metabolic process                                                       | cytoplasm;mitochondrion                              | catalytic activity                                                  | 0.245 | 0.245 | 1.00 |
| P47015 | Altered inheritance of mitochondria protein 23, mitochondrial [OS=Saccharomyces cerevisiae S288c] | 8533<br>10 | AIM23;<br>YJL131<br>C           | metabolic process                                                       | mitochondrion                                        | RNA binding                                                         | 0.35  | 0.35  | 1.00 |

|        |                                                                                                       |            |                                           |                                                                                              |                                                        |                                                                     |            |            |      |
|--------|-------------------------------------------------------------------------------------------------------|------------|-------------------------------------------|----------------------------------------------------------------------------------------------|--------------------------------------------------------|---------------------------------------------------------------------|------------|------------|------|
| P34222 | Peptidyl-tRNA hydrolase 2 [OS=Saccharomyces cerevisiae S288c]                                         | 8522<br>23 | PTH2;<br>YBL057<br>C                      | regulation of biological process                                                             | cytoplasm;cytosol;membrane;mitochondrion               | catalytic activity;protein binding                                  | 0.425      | 0.425      | 1.00 |
| P04803 | Tryptophan-tRNA ligase, mitochondrial [OS=Saccharomyces cerevisiae S288c]                             | 8518<br>61 | MSW1;<br>YDR26<br>8W                      | metabolic process                                                                            | cytoplasm;mitochondrion;organelle lumen                | catalytic activity;nucleotide binding                               | 0.292      | 0.292      | 1.00 |
| P22438 | Methionine-tRNA ligase, mitochondrial [OS=Saccharomyces cerevisiae S288c]                             | 8530<br>81 | MSM1;<br>YGR17<br>1C                      | metabolic process                                                                            | cytoplasm;cytosol;mitochondrion;organelle lumen        | catalytic activity;nucleotide binding                               | 0.136      | 0.136      | 1.00 |
| P53724 | 54S ribosomal protein L50, mitochondrial [OS=Saccharomyces cerevisiae S288c]                          | 8557<br>56 | MRPL5<br>0;<br>YNR02<br>2C                | cell organization and biogenesis;metabolic process                                           | mitochondrion;ribosome                                 | structural molecule activity                                        | 0.585      | 0.585      | 1.00 |
| Q07560 | Cardiolipin synthase (CMP-forming) [OS=Saccharomyces cerevisiae S288c]                                | 8514<br>13 | CRD1;<br>YDL142<br>C                      | cell organization and biogenesis;cellular homeostasis;metabolic process                      | membrane;mitochondrion                                 | catalytic activity                                                  | 0.166      | 0.166      | 1.00 |
| P49954 | probable hydrolase NIT3 [OS=Saccharomyces cerevisiae S288c]                                           | 8510<br>65 | NIT3;<br>YLR351<br>C                      | metabolic process                                                                            | cytoplasm;mitochondrion                                | catalytic activity                                                  | 0.129      | 0.129      | 1.00 |
| Q05867 | Uncharacterized protein YLR283W, mitochondrial [OS=Saccharomyces cerevisiae S288c]                    | 8509<br>88 | YLR283<br>W;<br>YLR283<br>W               |                                                                                              | endoplasmic reticulum;membrane;mitochondrion           |                                                                     | 0.11       | 0.11       | 1.00 |
| Q07534 | Solute carrier family 25 member 38 homolog [OS=Saccharomyces cerevisiae S288c]                        | 8514<br>39 | YDL119<br>C;<br>HEM25<br>;<br>YDL119<br>C | metabolic process;transport                                                                  | membrane;mitochondrion                                 | structural molecule activity;transporter activity                   | 0.245      | 0.245      | 1.00 |
| P32378 | 4-hydroxybenzoate polyprenyltransferase, mitochondrial [OS=Saccharomyces cerevisiae S288c]            | 8557<br>78 | COQ2;<br>YNR04<br>1C                      | metabolic process;transport                                                                  | membrane;mitochondrion                                 | catalytic activity                                                  | 0.292      | 0.292      | 1.00 |
| Q07821 | Iron-sulfur assembly protein 1 [OS=Saccharomyces cerevisiae S288c]                                    | 8506<br>32 | ISA1;<br>YLL027<br>W                      | cell organization and biogenesis;metabolic process                                           | mitochondrion;organelle lumen                          | metal ion binding;structural molecule activity                      | 0.136      | 0.136      | 1.00 |
| P41911 | Glycerol-3-phosphate dehydrogenase [NAD(+)] 2, mitochondrial [OS=Saccharomyces cerevisiae S288c]      | 8540<br>95 | GPD2;<br>YOL059<br>W                      | metabolic process                                                                            | cytoplasm;cytosol;mitochondrion                        | catalytic activity;nucleotide binding;protein binding               | 0.089      | 0.089      | 1.00 |
| Q06405 | ATP synthase subunit f, mitochondrial [OS=Saccharomyces cerevisiae S288c]                             | 8519<br>83 | ATP17;<br>YDR37<br>7W                     | metabolic process;transport                                                                  | membrane;mitochondrion                                 | catalytic activity;transporter activity                             | 1.512      | 1.512      | 1.00 |
| P38169 | Kynurenine 3-monooxygenase [OS=Saccharomyces cerevisiae S288c]                                        | 8521<br>79 | BN44;<br>YBL098<br>W                      | metabolic process                                                                            | membrane;mitochondrion                                 | catalytic activity;nucleotide binding                               | 0.172      | 0.172      | 1.00 |
| P08425 | phenylalanine-tRNA ligase, mitochondrial [OS=Saccharomyces cerevisiae S288c]                          | 8561<br>60 | MSF1;<br>YPR047<br>W                      | metabolic process                                                                            | cytoplasm;mitochondrion;organelle lumen                | catalytic activity;metal ion binding;nucleotide binding;RNA binding | 0.16       | 0.16       | 1.00 |
| P32463 | Acyl carrier protein, mitochondrial [OS=Saccharomyces cerevisiae S288c]                               | 8536<br>42 | ACP1;<br>YKL192<br>C                      | metabolic process;transport                                                                  | mitochondrion                                          |                                                                     | 0.259      | 0.259      | 1.00 |
| P38816 | thioredoxin reductase 2, mitochondrial [OS=Saccharomyces cerevisiae S288c]                            | 8565<br>06 | TRR2;<br>YHR10<br>6W                      | cellular homeostasis;metabolic process;regulation of biological process;response to stimulus | cytoplasm;mitochondrion                                | antioxidant activity;catalytic activity                             | 0.136      | 0.136      | 1.00 |
| Q06510 | Lysophosphatidylcholine acyltransferase [OS=Saccharomyces cerevisiae S288c]                           | 8562<br>62 | TAZ1;<br>YPR140<br>W                      | cell organization and biogenesis;metabolic process;transport                                 | membrane;mitochondrion                                 | catalytic activity                                                  | 0.093      | 0.093      | 1.00 |
| P04039 | Cytochrome c oxidase polypeptide VIII, mitochondrial [OS=Saccharomyces cerevisiae S288c]              | 8511<br>11 | COX8;<br>YLR395<br>C                      | metabolic process;transport                                                                  | membrane;mitochondrion                                 | catalytic activity;transporter activity                             | 0.778      | 0.778      | 1.00 |
| P10174 | cytochrome c oxidase subunit 7 [OS=Saccharomyces cerevisiae S288c]                                    | 8552<br>98 | COX7;<br>YMR25<br>6C                      | metabolic process;transport                                                                  | membrane;mitochondrion                                 | catalytic activity;transporter activity                             | 1.154      | 1.154      | 1.00 |
| Q05779 | Ubiquinone biosynthesis protein COQ9, mitochondrial [OS=Saccharomyces cerevisiae S288c]               | 8508<br>98 | COQ9;<br>YLR201<br>C                      | metabolic process                                                                            | membrane;mitochondrion                                 |                                                                     | 0.166      | 0.166      | 1.00 |
| P25578 | CDP-diacylglycerol-glycerol-3-phosphate 3-phosphatidyltransferase [OS=Saccharomyces cerevisiae S288c] | 8503<br>52 | PGS1;<br>YCL004<br>W                      | metabolic process                                                                            | mitochondrion                                          | catalytic activity;nucleotide binding                               | 0.083      | 0.083      | 1.00 |
| P07251 | ATP synthase subunit alpha, mitochondrial [OS=Saccharomyces cerevisiae S288c]                         | 8521<br>77 | ATP1;<br>YBL099<br>W                      | metabolic process;transport                                                                  | cytosol;membrane;mitochondrion                         | catalytic activity;nucleotide binding;transporter activity          | 34.93<br>8 | 37.31<br>2 | 1.07 |
| P32316 | acetyl-CoA hydrolase [OS=Saccharomyces cerevisiae S288c]                                              | 8522<br>66 | ACH1;<br>YBL015<br>W                      | metabolic process                                                                            | cytoplasm;cytosol;mitochondrion                        | catalytic activity                                                  | 15.29<br>8 | 16.47<br>5 | 1.08 |
| P32454 | Aminopeptidase 2, mitochondrial [OS=Saccharomyces cerevisiae S288c]                                   | 8536<br>99 | APE2;<br>YKL157<br>W                      | metabolic process                                                                            | cytoplasm;extracellular;membrane;mitochondrion;nucleus | catalytic activity;metal ion binding                                | 0.973      | 1.049      | 1.08 |
| P40495 | Homocitrate dehydrogenase, mitochondrial [OS=Saccharomyces cerevisiae S288c]                          | 8547<br>14 | LYS12;<br>YIL094<br>C                     | metabolic process                                                                            | mitochondrion                                          | catalytic activity;metal ion binding;nucleotide binding             | 4.109      | 4.623      | 1.13 |

|          |                                                                                                                                              |            |                                      |                                                                                                                                       |                                                 |                                                                                     |            |            |      |
|----------|----------------------------------------------------------------------------------------------------------------------------------------------|------------|--------------------------------------|---------------------------------------------------------------------------------------------------------------------------------------|-------------------------------------------------|-------------------------------------------------------------------------------------|------------|------------|------|
| Q01163   | 37S ribosomal protein S23, mitochondrial [OS=Saccharomyces cerevisiae S288c]                                                                 | 8527<br>48 | RSM23<br>;<br>YGL129<br>C            | cell organization and biogenesis;metabolic process                                                                                    | mitochondrion;ribosome                          | catalytic activity;nucleotide binding;RNA binding;structural molecule activity      | 0.983      | 1.11       | 1.13 |
| P04840   | Mitochondrial outer membrane protein porin 1 [OS=Saccharomyces cerevisiae S288c]                                                             | 8556<br>69 | POR1;<br>YNL055<br>C                 | cell death;cell organization and biogenesis;cellular homeostasis;regulation of biological process;transport                           | cytoplasm;membrane;mitochondrion                | transporter activity                                                                | 15.23<br>8 | 17.33      | 1.14 |
| P06208-1 | 2-isopropylmalate synthase [OS=Saccharomyces cerevisiae S288c]                                                                               | 8556<br>19 | LEU4;<br>YNL104<br>C                 | metabolic process                                                                                                                     | cytoplasm;mitochondrion                         | catalytic activity;protein binding                                                  | 5.236      | 6.017      | 1.15 |
| P34227   | Mitochondrial peroxiredoxin PRX1 [OS=Saccharomyces cerevisiae S288c]                                                                         | 8522<br>15 | PRX1;<br>YBL064<br>C                 | cellular homeostasis;metabolic process;regulation of biological process;response to stimulus                                          | mitochondrion                                   | antioxidant activity;catalytic activity                                             | 5.158      | 5.952      | 1.15 |
| P53292   | 37S ribosomal protein S35, mitochondrial [OS=Saccharomyces cerevisiae S288c]                                                                 | 8530<br>75 | MRP53<br>5;<br>YGR16<br>5W           | cell organization and biogenesis;metabolic process                                                                                    | mitochondrion;ribosome                          | structural molecule activity                                                        | 1.512      | 1.754      | 1.16 |
| P00360   | glyceraldehyde-3-phosphate dehydrogenase 1 [OS=Saccharomyces cerevisiae S288c]                                                               | 8533<br>95 | TDH1;<br>YJL052<br>W                 | metabolic process                                                                                                                     | cytoplasm;cytosol;membrane;mitochondrion        | catalytic activity;nucleotide binding                                               | 1.721      | 2.008      | 1.17 |
| P53206   | putative cysteine synthase [OS=Saccharomyces cerevisiae S288c]                                                                               | 8528<br>95 | YGR01<br>2W;<br>YGR01<br>2W          | metabolic process                                                                                                                     | mitochondrion                                   | catalytic activity                                                                  | 0.817      | 0.978      | 1.20 |
| P20967   | 2-oxoglutarate dehydrogenase, mitochondrial [OS=Saccharomyces cerevisiae S288c]                                                              | 8546<br>81 | KGD1;<br>YIL125<br>W                 | metabolic process                                                                                                                     | cytosol;mitochondrion;organelle lumen           | catalytic activity                                                                  | 11.42<br>6 | 13.78<br>5 | 1.21 |
| P39952   | Mitochondrial inner membrane protein OXA1 [OS=Saccharomyces cerevisiae S288c]                                                                | 8568<br>98 | OXA1;<br>YER154<br>W                 | cell organization and biogenesis;transport                                                                                            | membrane;mitochondrion                          | transporter activity                                                                | 1.371      | 1.738      | 1.27 |
| P28241   | Isocitrate dehydrogenase [NAD] subunit 2, mitochondrial [OS=Saccharomyces cerevisiae S288c]                                                  | 8543<br>03 | IDH2;<br>YOR13<br>6W                 | metabolic process                                                                                                                     | mitochondrion;organelle lumen                   | catalytic activity;metal ion binding;nucleotide binding;protein binding;RNA binding | 3.642      | 4.78       | 1.31 |
| P38988   | Mitochondrial GTP/GDP carrier protein 1 [OS=Saccharomyces cerevisiae S288c]                                                                  | 8513<br>29 | GGC1;<br>YDL198<br>C                 | cell organization and biogenesis;cellular homeostasis;metabolic process;transport                                                     | membrane;mitochondrion                          | structural molecule activity;transporter activity                                   | 3.16       | 4.179      | 1.32 |
| P25087   | Sterol 24-C-methyltransferase [OS=Saccharomyces cerevisiae S288c]                                                                            | 8550<br>03 | ERG6;<br>YML00<br>8C                 | metabolic process                                                                                                                     | endoplasmic reticulum;membrane;mitochondrion    | catalytic activity                                                                  | 1.424      | 1.894      | 1.33 |
| P12695   | Dihydrolypoyllysine-residue acetyltransferase component of pyruvate dehydrogenase complex, mitochondrial [OS=Saccharomyces cerevisiae S288c] | 8556<br>53 | LAT1;<br>YNL071<br>W                 | metabolic process                                                                                                                     | mitochondrion;organelle lumen                   | catalytic activity                                                                  | 6.43       | 9          | 1.40 |
| P36517   | 54S ribosomal protein L4, mitochondrial [OS=Saccharomyces cerevisiae S288c]                                                                  | 8511<br>60 | MRP44;<br>YLR439<br>W                | cell organization and biogenesis;metabolic process                                                                                    | mitochondrion;ribosome                          | structural molecule activity                                                        | 0.369      | 0.52       | 1.41 |
| P40416   | Iron-sulfur clusters transporter ATM1, mitochondrial [OS=Saccharomyces cerevisiae S288c]                                                     | 8553<br>47 | ATM1;<br>YMR30<br>1C                 | cellular homeostasis;metabolic process;transport                                                                                      | membrane;mitochondrion                          | catalytic activity;nucleotide binding;transporter activity                          | 0.453      | 0.645      | 1.42 |
| Q12374   | Nuclear control of ATPase protein 2 [OS=Saccharomyces cerevisiae S288c]                                                                      | 8562<br>78 | NCA2;<br>YPR155<br>C                 | metabolic process                                                                                                                     | membrane;mitochondrion                          |                                                                                     | 0.468      | 0.668      | 1.43 |
| P32939   | GTP-binding protein ypt7 [OS=Saccharomyces cerevisiae S288c]                                                                                 | 8550<br>12 | YPT7;<br>YML00<br>1W                 | cell communication;cell organization and biogenesis;metabolic process;regulation of biological process;response to stimulus;transport | cytosol;endosome;membrane;mitochondrion;vacuole | catalytic activity;nucleotide binding;protein binding                               | 0.585      | 0.848      | 1.45 |
| Q07651   | SUR7 family protein FMP45 [OS=Saccharomyces cerevisiae S288c]                                                                                | 8513<br>04 | FMP45;<br>YDL222<br>C                | cell differentiation;cell organization and biogenesis                                                                                 | membrane;mitochondrion                          |                                                                                     | 4.878      | 7.377      | 1.51 |
| P33303   | Succinate/fumarate mitochondrial transporter [OS=Saccharomyces cerevisiae S288c]                                                             | 8535<br>58 | SFC1;<br>YJR095<br>W                 | metabolic process;transport                                                                                                           | membrane;mitochondrion                          | structural molecule activity;transporter activity                                   | 9          | 13.67<br>8 | 1.52 |
| P30624   | Long-chain-fatty-acid--CoA ligase 1 [OS=Saccharomyces cerevisiae S288c]                                                                      | 8544<br>95 | FAA1;<br>YOR31<br>7W                 | metabolic process;transport                                                                                                           | endoplasmic reticulum;membrane;mitochondrion    | catalytic activity;nucleotide binding                                               | 4.549      | 7.072      | 1.55 |
| P00890   | citrate synthase, mitochondrial [OS=Saccharomyces cerevisiae S288c]                                                                          | 8557<br>32 | CIT1;<br>YNR00<br>1C                 | metabolic process;transport                                                                                                           | cytosol;mitochondrion;organelle lumen           | catalytic activity                                                                  | 9          | 14.08<br>6 | 1.57 |
| P34231   | Uncharacterized protein YKL187C [OS=Saccharomyces cerevisiae S288c]                                                                          | 8536<br>48 | FAT3;<br>YKL187<br>C;<br>YKL187<br>C | cell organization and biogenesis;transport                                                                                            | membrane;mitochondrion                          |                                                                                     | 0.194      | 0.304      | 1.57 |
| Q01852   | Mitochondrial import inner membrane translocase subunit TIM44 [OS=Saccharomyces cerevisiae S288c]                                            | 8547<br>90 | TIM44;<br>YIL022<br>W                | transport                                                                                                                             | membrane;mitochondrion                          | nucleotide binding;protein binding                                                  | 3.758      | 5.898      | 1.57 |

|        |                                                                                                             |         |                  |                                                                                                                           |                                                          |                                                                   |         |        |      |
|--------|-------------------------------------------------------------------------------------------------------------|---------|------------------|---------------------------------------------------------------------------------------------------------------------------|----------------------------------------------------------|-------------------------------------------------------------------|---------|--------|------|
| Q06485 | Autophagy-related protein 33 [OS=Saccharomyces cerevisiae S288c]                                            | 851070  | ATG33; YLR356W   | cell communication;metabolic process;response to stimulus                                                                 | membrane;mitochondrion                                   |                                                                   | 1.371   | 2.162  | 1.58 |
| Q12251 | Uncharacterized mitochondrial carrier YPR011C [OS=Saccharomyces cerevisiae S288c]                           | 856121  | YPR011C; YPR011C | metabolic process;transport                                                                                               | membrane;mitochondrion                                   | structural molecule activity;transporter activity                 | 0.245   | 0.389  | 1.59 |
| P50110 | Sorting assembly machinery 37 kDa subunit [OS=Saccharomyces cerevisiae S288c]                               | 855082  | SAM37; YMR060C   | cell organization and biogenesis;transport                                                                                | membrane;mitochondrion                                   | protein binding                                                   | 0.245   | 0.389  | 1.59 |
| P41735 | 5-demethoxyubiquinone hydroxylase, mitochondrial [OS=Saccharomyces cerevisiae S288c]                        | 854292  | CAT5; YOR125C    | metabolic process                                                                                                         | membrane;mitochondrion                                   | catalytic activity;metal ion binding                              | 0.334   | 0.54   | 1.62 |
| Q12375 | mitochondrial ornithine transporter 1 [OS=Saccharomyces cerevisiae S288c]                                   | 854297  | ORT1; YOR130C    | metabolic process;transport                                                                                               | membrane;mitochondrion                                   | structural molecule activity;transporter activity                 | 0.334   | 0.54   | 1.62 |
| Q03327 | Mitochondrial fusion and transport protein Ugo1 [OS=Saccharomyces cerevisiae S288c]                         | 852081  | UGO1; YDR470C    | cell organization and biogenesis;metabolic process                                                                        | membrane;mitochondrion                                   | protein binding;structural molecule activity                      | 0.425   | 0.701  | 1.65 |
| P00942 | Triosephosphate isomerase [OS=Saccharomyces cerevisiae S288c]                                               | 851620  | TPI1; YDR050C    | metabolic process                                                                                                         | cytoplasm;cytosol;membrane;mitochondrion                 | catalytic activity                                                | 0.425   | 0.701  | 1.65 |
| P38297 | Mitofusin FZO1 [OS=Saccharomyces cerevisiae S288c]                                                          | 852477  | FZO1; YBR179C    | cell organization and biogenesis                                                                                          | membrane;mitochondrion                                   | catalytic activity;nucleotide binding;protein binding             | 0.142   | 0.248  | 1.75 |
| P39002 | long-chain-fatty-acid--CoA ligase 3 [OS=Saccharomyces cerevisiae S288c]                                     | 854808  | FAA3; YIL009W    | metabolic process                                                                                                         |                                                          | catalytic activity;nucleotide binding                             | 0.334   | 0.585  | 1.75 |
| P21801 | Succinate dehydrogenase [ubiquinone] iron-sulfur subunit, mitochondrial [OS=Saccharomyces cerevisiae S288c] | 850685  | SDH2; YLL041C    | metabolic process;transport                                                                                               | membrane;mitochondrion                                   | catalytic activity;metal ion binding                              | 18.684  | 32.839 | 1.76 |
| P19882 | heat shock protein 60, mitochondrial [OS=Saccharomyces cerevisiae S288c]                                    | 850963  | HSP60; YLR259C   | cell organization and biogenesis;metabolic process;regulation of biological process;transport                             | cytoplasm;cytosol;membrane;mitochondrion;organelle lumen | catalytic activity;DNA binding;nucleotide binding;protein binding | 22.357  | 39.296 | 1.76 |
| P39515 | mitochondrial import inner membrane translocase subunit Tim17 [OS=Saccharomyces cerevisiae S288c]           | 853298  | TIM17; YJL143W   | cell organization and biogenesis;transport                                                                                | membrane;mitochondrion                                   | protein binding;transporter activity                              | 0.778   | 1.371  | 1.76 |
| P09624 | Dihydrolipoyl dehydrogenase, mitochondrial [OS=Saccharomyces cerevisiae S288c]                              | 850527  | LPD1; YFL018C    | cellular homeostasis;metabolic process;regulation of biological process                                                   | mitochondrion;organelle lumen                            | catalytic activity;nucleotide binding                             | 21.539  | 43.367 | 2.01 |
| Q00402 | Nuclear migration protein NUM1 [OS=Saccharomyces cerevisiae S288c]                                          | 851727  | NUM1; YDR150W    | cell organization and biogenesis;cellular component movement;metabolic process;regulation of biological process;transport | endoplasmic reticulum;mitochondrion                      | catalytic activity;motor activity;protein binding                 | 0.025   | 0.052  | 2.08 |
| Q02863 | ubiquitin carboxyl-terminal hydrolase 16 [OS=Saccharomyces cerevisiae S288c]                                | 856032  | UBP16; YPL072W   | metabolic process                                                                                                         | membrane;mitochondrion                                   | catalytic activity                                                | 0.072   | 0.15   | 2.08 |
| P40015 | inositol phosphosphingolipids phospholipase C [OS=Saccharomyces cerevisiae S288c]                           | 856739  | ISC1; YER019W    | metabolic process;response to stimulus                                                                                    | endoplasmic reticulum;membrane;mitochondrion             | catalytic activity;metal ion binding                              | 0.101   | 0.212  | 2.10 |
| P38271 | Protein OPY1 [OS=Saccharomyces cerevisiae S288c]                                                            | 852426  | OPY1; YBR129C    |                                                                                                                           | cytoplasm;mitochondrion                                  |                                                                   | 0.129   | 0.274  | 2.12 |
| P38884 | Altered inheritance of mitochondria protein 18, mitochondrial [OS=Saccharomyces cerevisiae S288c]           | 856605  | AIM18; YHR198C   |                                                                                                                           | mitochondrion                                            | catalytic activity                                                | 0.145   | 0.311  | 2.14 |
| Q08926 | ULP1-interacting protein 4 [OS=Saccharomyces cerevisiae S288c]                                              | 855916  | UIP4; YPL186C    |                                                                                                                           | endoplasmic reticulum;membrane;mitochondrion;nucleus     |                                                                   | 0.136   | 0.292  | 2.15 |
| P41921 | glutathione reductase [OS=Saccharomyces cerevisiae S288c]                                                   | 856014  | GLR1; YPL091W    | cellular homeostasis;metabolic process;regulation of biological process;response to stimulus                              | cytoplasm;cytosol;mitochondrion;nucleus                  | antioxidant activity;catalytic activity;nucleotide binding        | 0.155   | 0.334  | 2.15 |
| P16547 | Mitochondrial outer membrane protein OM45 [OS=Saccharomyces cerevisiae S288c]                               | 854670  | OM45; YIL136W    |                                                                                                                           | membrane;mitochondrion                                   |                                                                   | 250.189 | 574.44 | 2.30 |
| P28737 | Protein MSP1 [OS=Saccharomyces cerevisiae S288c]                                                            | 852915  | MSP1; YGR028W    | cell organization and biogenesis;metabolic process;regulation of biological process;response to stimulus;transport        | membrane;mitochondrion;nucleus                           | catalytic activity;nucleotide binding;protein binding;RNA binding | 0.259   | 0.778  | 3.00 |
| P40496 | 37S ribosomal protein S25, mitochondrial [OS=Saccharomyces cerevisiae S288c]                                | 854715  | RSM25; YIL093C   | cell organization and biogenesis;metabolic process                                                                        | mitochondrion;ribosome                                   | structural molecule activity                                      | 0.292   | 0.896  | 3.07 |
| Q2V2P9 | Uncharacterized protein YDR119W-A [OS=Saccharomyces cerevisiae S288c]                                       | 3799970 | COX26; YDR119W-A |                                                                                                                           | membrane;mitochondrion                                   |                                                                   | 1.154   | 3.642  | 3.16 |



|        |                                                                                       |        |                  |                                            |                        |                                      |       |        |      |
|--------|---------------------------------------------------------------------------------------|--------|------------------|--------------------------------------------|------------------------|--------------------------------------|-------|--------|------|
| P53925 | Uncharacterized vacuolar membrane protein YNL115C [OS=Saccharomyces cerevisiae S288c] | 855608 | YNL115C; YNL115C |                                            | membrane;vacuole       |                                      | 0.072 | 0.233  | 3.24 |
| P32792 | UPF0744 protein YSC83 [OS=Saccharomyces cerevisiae S288c]                             | 856410 | YSC83; YHR017W   |                                            | membrane;mitochondrion |                                      | 0.11  | 0.52   | 4.73 |
| P49334 | Mitochondrial import receptor subunit tom22 [OS=Saccharomyces cerevisiae S288c]       | 855592 | TOM22; YNL131W   | cell organization and biogenesis;transport | membrane;mitochondrion | protein binding;transporter activity | 0.292 | 1.783  | 6.11 |
| Q08245 | protein ZEO1 [OS=Saccharomyces cerevisiae S288c]                                      | 854040 | ZEO1; YOL109W    | cell organization and biogenesis           | membrane;mitochondrion | protein binding                      | 1.512 | 11.589 | 7.66 |

**Supplemental Table S6. The relative concentrations of proteins in mitochondria purified from WT or *ups1Δ* cells cultured without LCA.** Mitochondria were purified from WT or *ups1Δ* cells recovered on day 7 of cell culturing without LCA. Mass spectrometry-based identification and quantitation of proteins recovered in purified mitochondria were performed as described in Materials and methods. The exponentially modified protein abundance index (emPAI) provided by the "Proteome Discoverer" software was used to calculate the relative abundance of mitochondrial proteins between specified datasets. Data on the relative concentrations of mitochondrial proteins are presented as means of 2 independent experiments.

| Accession | Description                                                                                       | Entre z Gene ID | Gene ID              | Biological Process                                                                                                                | Cellular Component                                  | Molecular Function                                                     | emPAI WT | emPAI <i>ups1</i> | Ratio <i>ups1</i> / WT |
|-----------|---------------------------------------------------------------------------------------------------|-----------------|----------------------|-----------------------------------------------------------------------------------------------------------------------------------|-----------------------------------------------------|------------------------------------------------------------------------|----------|-------------------|------------------------|
| P36527    | 54S ribosomal protein L28, mitochondrial                                                          | 852073          | MRPL28               | cell organization and biogenesis; metabolic process                                                                               | mitochondrion; ribosome                             | structural molecule activity                                           | 4.337    | 0.233             | 0.05                   |
| Q04935    | Cytochrome c oxidase protein 20, mitochondrial [OS=Saccharomyces cerevisiae S288c]                | 851817          | COX20; YDR231C       | cell organization and biogenesis; metabolic process                                                                               | membrane; mitochondrion                             | protein binding                                                        | 1.894    | 0.194             | 0.10                   |
| P08525    | Cytochrome b-c1 complex subunit 8 [OS=Saccharomyces cerevisiae S288c]                             | 853273          | QCR8; YJL166W        | metabolic process; transport                                                                                                      | membrane; mitochondrion                             | catalytic activity; transporter activity                               | 5.31     | 0.585             | 0.11                   |
| P38341    | MICOS complex subunit MIC12 [OS=Saccharomyces cerevisiae S288c]                                   | 852566          | AIM5; MIC12; YBR262C | cell organization and biogenesis                                                                                                  | membrane; mitochondrion                             |                                                                        | 2.594    | 0.292             | 0.11                   |
| P07253    | cytochrome B pre-mRNA-processing protein 6 [OS=Saccharomyces cerevisiae S288c]                    | 852417          | CBP6; YBR120C        | cell organization and biogenesis; metabolic process; regulation of biological process                                             | mitochondrion; ribosome                             |                                                                        | 3.394    | 0.389             | 0.11                   |
| P36141    | Putative redox protein fmp46, mitochondrial [OS=Saccharomyces cerevisiae S288c]                   | 853923          | FMP46; YKR049C       | metabolic process                                                                                                                 | mitochondrion                                       | catalytic activity; protein binding                                    | 4.337    | 0.52              | 0.12                   |
| P53219    | Abhydrolase domain-containing protein IMO32 [OS=Saccharomyces cerevisiae S288c]                   | 852919          | IMO32; YGR031W       | metabolic process; transport                                                                                                      | mitochondrion                                       | catalytic activity                                                     | 0.73     | 0.116             | 0.16                   |
| P00045    | Cytochrome c iso-2 [OS=Saccharomyces cerevisiae S288c]                                            | 856672          | CYC7; YEL039C        | metabolic process; transport                                                                                                      | mitochondrion                                       | metal ion binding                                                      | 1.512    | 0.259             | 0.17                   |
| Q12032    | Altered inheritance of mitochondria protein 41, mitochondrial [OS=Saccharomyces cerevisiae S288c] | 854390          | AIM41; YOR215C       |                                                                                                                                   | mitochondrion                                       | catalytic activity                                                     | 1.154    | 0.212             | 0.18                   |
| P32799    | Cytochrome c oxidase subunit 6A, mitochondrial [OS=Saccharomyces cerevisiae S288c]                | 852684          | COX13; YGL191W       | cell organization and biogenesis; metabolic process; regulation of biological process; transport                                  | membrane; mitochondrion                             | catalytic activity; enzyme regulator activity; transporter activity    | 11.589   | 2.162             | 0.19                   |
| P38175    | 37S ribosomal protein MRP21, mitochondrial [OS=Saccharomyces cerevisiae S288c]                    | 852188          | MRP21; YBL090W       | cell organization and biogenesis; metabolic process                                                                               | mitochondrion; ribosome                             | structural molecule activity                                           | 1.031    | 0.194             | 0.19                   |
| P53305    | Mitochondrial 37S ribosomal protein S27 [OS=Saccharomyces cerevisiae S288c]                       | 853129          | RSM27; YGR215W       | cell organization and biogenesis; metabolic process                                                                               | mitochondrion; ribosome                             | structural molecule activity                                           | 2.162    | 0.468             | 0.22                   |
| P54115    | Magnesium-activated aldehyde dehydrogenase, cytosolic [OS=Saccharomyces cerevisiae S288c]         | 856044          | ALD6; YPL061W        | metabolic process; response to stimulus                                                                                           | cytoplasm; cytosol; mitochondrion                   | catalytic activity                                                     | 0.346    | 0.077             | 0.22                   |
| P22438    | Methionine-tRNA ligase, mitochondrial [OS=Saccharomyces cerevisiae S288c]                         | 853081          | MSM1; YGR171C        | metabolic process                                                                                                                 | cytoplasm; cytosol; mitochondrion; organelle lumen  | catalytic activity; nucleotide binding                                 | 0.292    | 0.066             | 0.23                   |
| P18496    | Mitochondrial ATPase complex subunit ATP10 [OS=Saccharomyces cerevisiae S288c]                    | 851109          | ATP10; YLR393W       | cell organization and biogenesis                                                                                                  | cytoplasm; membrane; mitochondrion                  | protein binding                                                        | 1.818    | 0.413             | 0.23                   |
| P18900    | hexaprenyl pyrophosphate synthase, mitochondrial [OS=Saccharomyces cerevisiae S288c]              | 852288          | COQ1; YBR003W        | metabolic process                                                                                                                 | membrane; mitochondrion                             | catalytic activity; metal ion binding; protein binding                 | 0.711    | 0.166             | 0.23                   |
| P48360    | Probable NADPH:adrenodoxin oxidoreductase, mitochondrial [OS=Saccharomyces cerevisiae S288c]      | 851982          | ARH1; YDR376W        | cellular homeostasis; metabolic process; transport                                                                                | cytoplasm; membrane; mitochondrion; organelle lumen | catalytic activity                                                     | 0.682    | 0.16              | 0.23                   |
| P81449    | ATP synthase subunit e, mitochondrial [OS=Saccharomyces cerevisiae S288c]                         | 851922          | TIM11; YDR322C-A     | cell organization and biogenesis; metabolic process; transport                                                                    | membrane; mitochondrion                             | catalytic activity; structural molecule activity; transporter activity | 9        | 2.162             | 0.24                   |
| Q02784    | Monothiol glutaredoxin-5, mitochondrial [OS=Saccharomyces cerevisiae S288c]                       | 856048          | GRX5; YPL059W        | cell organization and biogenesis; cellular homeostasis; metabolic process; regulation of biological process; response to stimulus | mitochondrion; organelle lumen                      | catalytic activity; metal ion binding                                  | 2.594    | 0.668             | 0.26                   |
| Q6Q560    | Protein isd11 [OS=Saccharomyces cerevisiae S288c]                                                 | 856774          | ISD11; YER048W-A     | cell organization and biogenesis; metabolic process                                                                               | mitochondrion; organelle lumen                      | catalytic activity; protein binding                                    | 2.594    | 0.668             | 0.26                   |
| Q08223    | Altered inheritance of mitochondria protein 39, mitochondrial                                     | 854103          | AIM39; YOL053        |                                                                                                                                   | cytosol; membrane; mitochondrion                    |                                                                        | 0.995    | 0.259             | 0.26                   |

|        |                                                                                                   |            |                                           |                                                                                                  |                                                 |                                                               |       |       |      |
|--------|---------------------------------------------------------------------------------------------------|------------|-------------------------------------------|--------------------------------------------------------------------------------------------------|-------------------------------------------------|---------------------------------------------------------------|-------|-------|------|
|        | [OS=Saccharomyces cerevisiae S288c]                                                               |            | W                                         |                                                                                                  |                                                 |                                                               |       |       |      |
| P40581 | peroxiredoxin HYR1 [OS=Saccharomyces cerevisiae S288c]                                            | 8548<br>55 | HYR1;<br>YI037<br>W                       | metabolic process;response to stimulus                                                           | cytoplasm;cytosol;mitochondrion;organelle lumen | antioxidant activity;catalytic activity                       | 0.995 | 0.259 | 0.26 |
| P36163 | mitochondrial metalloendopeptidase OMA1 [OS=Saccharomyces cerevisiae S288c]                       | 8539<br>62 | OMA1;<br>YK087<br>C                       | metabolic process                                                                                | membrane;mitochondrion                          | catalytic activity;metal ion binding                          | 0.931 | 0.245 | 0.26 |
| P47140 | Altered inheritance rate of mitochondria protein 25 [OS=Saccharomyces cerevisiae S288c]           | 8535<br>63 | AIM25;<br>YJR100<br>C                     | cell organization and biogenesis                                                                 | membrane;mitochondrion                          | transporter activity                                          | 0.874 | 0.233 | 0.27 |
| P53875 | 54S ribosomal protein L19, mitochondrial [OS=Saccharomyces cerevisiae S288c]                      | 8555<br>36 | MRPL1<br>9;<br>YNL185<br>C                | cell organization and biogenesis;metabolic process                                               | mitochondrion;ribosome                          | RNA binding;structural molecule activity                      | 0.874 | 0.233 | 0.27 |
| P40858 | 54S ribosomal protein L49, mitochondrial [OS=Saccharomyces cerevisiae S288c]                      | 8533<br>49 | MRPL4<br>9;<br>YJL096<br>W                | cell organization and biogenesis;metabolic process                                               | mitochondrion;ribosome                          | RNA binding;structural molecule activity                      | 0.778 | 0.212 | 0.27 |
| P40165 | NAD(P)H-hydrate epimerase [OS=Saccharomyces cerevisiae S288c]                                     | 8555<br>21 | YNL200<br>C;<br>YNL200<br>C               | metabolic process                                                                                | cytoplasm;mitochondrion                         | catalytic activity;metal ion binding;nucleotide binding       | 1.61  | 0.468 | 0.29 |
| P38271 | Protein OPY1 [OS=Saccharomyces cerevisiae S288c]                                                  | 8524<br>26 | OPY1;<br>YBR129<br>C                      |                                                                                                  | cytoplasm;mitochondrion                         |                                                               | 0.438 | 0.129 | 0.29 |
| P21560 | Protein CBP3, mitochondrial [OS=Saccharomyces cerevisiae S288c]                                   | 8558<br>86 | CBP3;<br>YPL215<br>W                      | cell organization and biogenesis;regulation of biological process                                | membrane;mitochondrion;ribosome                 |                                                               | 1.031 | 0.304 | 0.29 |
| Q06236 | Mitochondrial inner membrane protein SHH4 [OS=Saccharomyces cerevisiae S288c]                     | 8508<br>61 | SHH4;<br>YLR164<br>W                      | metabolic process                                                                                | membrane;mitochondrion                          | catalytic activity;metal ion binding                          | 4.623 | 1.371 | 0.30 |
| P38705 | Serine--tRNA ligase, mitochondrial [OS=Saccharomyces cerevisiae S288c]                            | 8564<br>02 | DIA4;<br>YHR01<br>1W                      | metabolic process                                                                                | cytoplasm;mitochondrion;organelle lumen         | catalytic activity;nucleotide binding                         | 0.233 | 0.072 | 0.31 |
| Q02863 | ubiquitin carboxyl-terminal hydrolase 16 [OS=Saccharomyces cerevisiae S288c]                      | 8560<br>32 | UBP16;<br>YPL072<br>W                     | metabolic process                                                                                | membrane;mitochondrion                          | catalytic activity                                            | 0.233 | 0.072 | 0.31 |
| P39722 | Mitochondrial Rho GTPase 1 [OS=Saccharomyces cerevisiae S288c]                                    | 8512<br>49 | GEM1;<br>YAL048<br>C                      | cell organization and biogenesis;regulation of biological process;response to stimulus;transport | membrane;mitochondrion                          | catalytic activity;metal ion binding;nucleotide binding       | 0.189 | 0.059 | 0.31 |
| Q01519 | Cytochrome c oxidase subunit 6b [OS=Saccharomyces cerevisiae S288c]                               | 8507<br>27 | COX12;<br>YLR038<br>C                     | cell organization and biogenesis;metabolic process;transport                                     | mitochondrion                                   | catalytic activity;transporter activity                       | 3.642 | 1.154 | 0.32 |
| P42847 | 37S ribosomal protein S18, mitochondrial [OS=Saccharomyces cerevisiae S288c]                      | 8554<br>10 | MRPS1<br>8;<br>YNL306<br>W                | cell organization and biogenesis;metabolic process                                               | mitochondrion;ribosome                          | RNA binding;structural molecule activity                      | 1.054 | 0.334 | 0.32 |
| Q03653 | protein EFR3 [OS=Saccharomyces cerevisiae S288c]                                                  | 8552<br>52 | EFR3;<br>YMR21<br>2C                      |                                                                                                  | membrane;mitochondrion                          |                                                               | 0.148 | 0.047 | 0.32 |
| P11914 | Mitochondrial-processing peptidase subunit alpha [OS=Saccharomyces cerevisiae S288c]              | 8564<br>19 | MAS2;<br>YHR02<br>4C                      | metabolic process;transport                                                                      | membrane;mitochondrion;organelle lumen          | catalytic activity;metal ion binding;protein binding          | 2.311 | 0.738 | 0.32 |
| Q03798 | Altered inheritance of mitochondria protein 36, mitochondrial [OS=Saccharomyces cerevisiae S288c] | 8551<br>89 | AIM36;<br>YMR15<br>7C                     |                                                                                                  | membrane;mitochondrion                          |                                                               | 1.336 | 0.438 | 0.33 |
| P14908 | Mitochondrial transcription factor 1 [OS=Saccharomyces cerevisiae S288c]                          | 8552<br>68 | MTF1;<br>YMR22<br>8W                      | metabolic process;regulation of biological process                                               | mitochondrion;organelle lumen                   | catalytic activity;DNA binding;RNA binding                    | 0.778 | 0.259 | 0.33 |
| P10834 | protein PET54 [OS=Saccharomyces cerevisiae S288c]                                                 | 8531<br>37 | PET54;<br>YGR22<br>2W                     | metabolic process;regulation of biological process                                               | membrane;mitochondrion;organelle lumen          | nucleotide binding;RNA binding;translation regulator activity | 0.688 | 0.233 | 0.34 |
| Q12349 | ATP synthase subunit H, mitochondrial [OS=Saccharomyces cerevisiae S288c]                         | 8510<br>02 | ATP14;<br>YLR295<br>C                     | cell organization and biogenesis;metabolic process;transport                                     | membrane;mitochondrion                          | catalytic activity;transporter activity                       | 2.728 | 0.931 | 0.34 |
| Q05648 | MIOREX complex component 10 [OS=Saccharomyces cerevisiae S288c]                                   | 8518<br>76 | YDR28<br>2C;<br>MRX10<br>;<br>YDR28<br>2C |                                                                                                  | membrane;mitochondrion                          |                                                               | 0.65  | 0.222 | 0.34 |
| P38088 | Glycine--tRNA ligase 1, mitochondrial [OS=Saccharomyces cerevisiae S288c]                         |            | GRS1                                      | metabolic process                                                                                | cytoplasm;mitochondrion;organelle lumen         | catalytic activity;nucleotide binding;protein binding         | 0.616 | 0.212 | 0.34 |
| P53166 | ATP-dependent RNA helicase mrh4, mitochondrial [OS=Saccharomyces cerevisiae S288c]                | 8528<br>16 | MRH4;<br>YGL064<br>C                      | cell organization and biogenesis;metabolic process                                               | mitochondrion;organelle lumen                   | catalytic activity;nucleotide binding;RNA binding             | 1.412 | 0.501 | 0.35 |
| P36516 | 54S ribosomal protein L3, mitochondrial [OS=Saccharomyces cerevisiae S288c]                       | 8550<br>39 | MRPL3;<br>YMR02<br>4W                     | cell organization and biogenesis;metabolic process;response to stimulus                          | mitochondrion;nucleus;ribosome                  | catalytic activity;RNA binding;structural molecule activity   | 1.043 | 0.374 | 0.36 |
| P38120 | 37S ribosomal protein S9, mitochondrial [OS=Saccharomyces cerevisiae S288c]                       | 8524<br>43 | MRPS9<br>;                                | cell organization and biogenesis;metabolic process                                               | mitochondrion;ribosome                          | RNA binding;structural                                        | 3.437 | 1.254 | 0.36 |

|        |                                                                                                           |            |                                 |                                                                                      |                                                 |                                                                                |            |       |      |
|--------|-----------------------------------------------------------------------------------------------------------|------------|---------------------------------|--------------------------------------------------------------------------------------|-------------------------------------------------|--------------------------------------------------------------------------------|------------|-------|------|
|        | cerevisiae S288c]                                                                                         |            | YBR146<br>W                     |                                                                                      |                                                 | molecule activity                                                              |            |       |      |
| P38885 | Altered inheritance of mitochondria protein 46, mitochondrial [OS=Saccharomyces cerevisiae S288c]         | 8566<br>06 | AIM46;<br>YHR19<br>9C           |                                                                                      | mitochondrion                                   | catalytic activity                                                             | 1.994      | 0.73  | 0.37 |
| P48527 | Tyrosine--tRNA ligase, mitochondrial [OS=Saccharomyces cerevisiae S288c]                                  | 8560<br>07 | MSY1;<br>YPL097<br>W            | metabolic process                                                                    | cytoplasm;cytosol;mitochondrion;organelle lumen | catalytic activity;nucleotide binding;RNA binding                              | 0.63       | 0.233 | 0.37 |
| P38323 | ATP-dependent clpX-like chaperone, mitochondrial [OS=Saccharomyces cerevisiae S288c]                      | 8525<br>28 | MCX1;<br>YBR227<br>C            | metabolic process                                                                    | membrane;mitochondrion;organelle lumen          | catalytic activity;nucleotide binding                                          | 0.607      | 0.225 | 0.37 |
| P00044 | Cytochrome c iso-1 [OS=Saccharomyces cerevisiae S288c]                                                    | 8535<br>07 | CYC1;<br>YJR048<br>W            | metabolic process;transport                                                          | mitochondrion                                   | metal ion binding;protein binding                                              | 12.33<br>5 | 4.623 | 0.37 |
| P40035 | Mitochondrial phosphate carrier protein 2 [OS=Saccharomyces cerevisiae S288c]                             | 8567<br>79 | PIC2;<br>YER053<br>C            | cellular homeostasis;metabolic process;transport                                     | membrane;mitochondrion                          | structural molecule activity;transporter activity                              | 2.793      | 1.069 | 0.38 |
| P32453 | Protein ATP11, mitochondrial [OS=Saccharomyces cerevisiae S288c]                                          | 8554<br>01 | ATP11;<br>YNL315<br>C           | cell organization and biogenesis                                                     | mitochondrion                                   | protein binding                                                                | 1.512      | 0.585 | 0.39 |
| P38127 | mitochondrial carrier protein RIM2 [OS=Saccharomyces cerevisiae S288c]                                    | 8524<br>91 | RIM2;<br>YBR192<br>W            | cell organization and biogenesis;metabolic process;transport                         | membrane;mitochondrion                          | structural molecule activity;transporter activity                              | 1.512      | 0.585 | 0.39 |
| Q01163 | 37S ribosomal protein S23, mitochondrial [OS=Saccharomyces cerevisiae S288c]                              | 8527<br>48 | RSM23<br>;<br>YGL129<br>C       | cell organization and biogenesis;metabolic process                                   | mitochondrion;ribosome                          | catalytic activity;nucleotide binding;RNA binding;structural molecule activity | 4.367      | 1.707 | 0.39 |
| P40452 | Cytochrome c oxidase assembly factor 1 [OS=Saccharomyces cerevisiae S288c]                                | 8546<br>49 | COA1;<br>YIL157<br>C            | cell organization and biogenesis                                                     | membrane;mitochondrion                          | protein binding                                                                | 1.31       | 0.52  | 0.40 |
| P43594 | MICOS complex subunit MIC19 [OS=Saccharomyces cerevisiae S288c]                                           | 8505<br>63 | AIM13;<br>MIC19;<br>YFR011<br>C | cell organization and biogenesis                                                     | cytoplasm;membrane;mitochondrion                |                                                                                | 1.31       | 0.52  | 0.40 |
| P47015 | Altered inheritance of mitochondria protein 23, mitochondrial [OS=Saccharomyces cerevisiae S288c]         | 8533<br>10 | AIM23;<br>YJL131<br>C           | metabolic process                                                                    | mitochondrion                                   | RNA binding                                                                    | 1.228      | 0.492 | 0.40 |
| P36517 | 54S ribosomal protein L4, mitochondrial [OS=Saccharomyces cerevisiae S288c]                               | 8511<br>60 | MRPL4;<br>YLR439<br>W           | cell organization and biogenesis;metabolic process                                   | mitochondrion;ribosome                          | structural molecule activity                                                   | 2.162      | 0.874 | 0.40 |
| P40496 | 37S ribosomal protein S25, mitochondrial [OS=Saccharomyces cerevisiae S288c]                              | 8547<br>15 | RSM25<br>;<br>YIL093<br>C       | cell organization and biogenesis;metabolic process                                   | mitochondrion;ribosome                          | structural molecule activity                                                   | 1.154      | 0.468 | 0.41 |
| P23833 | Protein SCO1, mitochondrial [OS=Saccharomyces cerevisiae S288c]                                           | 8523<br>25 | SCO1;<br>YBR037<br>C            | cell organization and biogenesis;cellular homeostasis;response to stimulus;transport | membrane;mitochondrion                          | antioxidant activity;catalytic activity;metal ion binding                      | 1.154      | 0.468 | 0.41 |
| P48569 | Uncharacterized protein YDL183C [OS=Saccharomyces cerevisiae S288c]                                       | 8513<br>45 | YDL183<br>C;<br>YDL183<br>C     | transport                                                                            |                                                 |                                                                                | 1.069      | 0.438 | 0.41 |
| P36066 | Protein MRG3-like [OS=Saccharomyces cerevisiae S288c]                                                     | 8537<br>25 | YKL133<br>C;<br>YKL133<br>C     | metabolic process                                                                    | membrane;mitochondrion                          | protein binding                                                                | 1.054      | 0.433 | 0.41 |
| P25573 | Mitochondrial inner membrane i-AAA protease supercomplex subunit MGR1 [OS=Saccharomyces cerevisiae S288c] | 8503<br>13 | MGR1;<br>YCL044<br>C            | metabolic process                                                                    | membrane;mitochondrion                          | protein binding                                                                | 1.031      | 0.425 | 0.41 |
| P35180 | mitochondrial import receptor subunit Tom20 [OS=Saccharomyces cerevisiae S288c]                           | 8529<br>73 | TOM20<br>;<br>YGR08<br>2W       | cell organization and biogenesis;transport                                           | membrane;mitochondrion                          | protein binding;transporter activity                                           | 1.031      | 0.425 | 0.41 |
| Q02608 | 37S ribosomal protein S16, mitochondrial [OS=Saccharomyces cerevisiae S288c]                              | 8560<br>94 | MRPS1<br>6;<br>YPL013<br>C      | cell organization and biogenesis;metabolic process                                   | mitochondrion;ribosome                          | structural molecule activity                                                   | 0.931      | 0.389 | 0.42 |
| P46998 | mitochondrial membrane protein FMP33 [OS=Saccharomyces cerevisiae S288c]                                  | 8532<br>79 | FMP33;<br>YJL161<br>W           |                                                                                      | membrane;mitochondrion                          |                                                                                | 0.778      | 0.334 | 0.43 |
| P22354 | 54S ribosomal protein L20, mitochondrial [OS=Saccharomyces cerevisiae S288c]                              | 8539<br>60 | MRPL2<br>0;<br>YKR085<br>C      | cell organization and biogenesis;metabolic process                                   | mitochondrion;ribosome                          | structural molecule activity                                                   | 2.162      | 0.931 | 0.43 |
| Q12305 | Thiosulfate sulfurtransferase RDL1, mitochondrial [OS=Saccharomyces cerevisiae S288c]                     | 8544<br>59 | RDL1;<br>YOR28<br>5W            |                                                                                      | endoplasmic reticulum;membrane;mitochondrion    | catalytic activity                                                             | 0.668      | 0.292 | 0.44 |
| P14063 | 54S ribosomal protein L31, mitochondrial [OS=Saccharomyces cerevisiae S288c]                              | 8537<br>20 | MRPL3<br>1;<br>YKL138<br>C      | cell organization and biogenesis;metabolic process                                   | mitochondrion;ribosome                          | structural molecule activity                                                   | 0.668      | 0.292 | 0.44 |
| P40416 | Iron-sulfur clusters transporter ATM1, mitochondrial [OS=Saccharomyces cerevisiae S288c]                  | 8553<br>47 | ATM1;<br>YMR30<br>1C            | cellular homeostasis;metabolic process;transport                                     | membrane;mitochondrion                          | catalytic activity;nucleotide binding;transporter activity                     | 0.645      | 0.283 | 0.44 |
| P42844 | Mitochondrial protein import protein ZIM17 [OS=Saccharomyces cerevisiae                                   | 8554<br>06 | ZIM17;<br>YNL310                | cell organization and biogenesis;metabolic                                           | membrane;mitochondrion;organelle lumen          | metal ion binding;protein                                                      | 0.585      | 0.259 | 0.44 |

|        |                                                                                                     |        |                   |                                                                                                        |                                |                                                             |       |       |      |
|--------|-----------------------------------------------------------------------------------------------------|--------|-------------------|--------------------------------------------------------------------------------------------------------|--------------------------------|-------------------------------------------------------------|-------|-------|------|
|        | S288c]                                                                                              |        | C                 | process;regulation of biological process;response to stimulus;transport                                |                                | binding                                                     |       |       |      |
| P36528 | 54S ribosomal protein L17, mitochondrial [OS=Saccharomyces cerevisiae S288c]                        | 855469 | MRPL17; YNL252C   | cell organization and biogenesis;metabolic process                                                     | mitochondrion;ribosome         | structural molecule activity                                | 0.52  | 0.233 | 0.45 |
| Q12487 | 54S ribosomal protein L23, mitochondrial [OS=Saccharomyces cerevisiae S288c]                        | 854321 | MRPL23; YOR150W   | cell organization and biogenesis;metabolic process                                                     | mitochondrion;ribosome;vacuole | RNA binding;structural molecule activity                    | 0.52  | 0.233 | 0.45 |
| P34224 | Uncharacterized protein YBL059W [OS=Saccharomyces cerevisiae S288c]                                 | 852221 | YBL059W; YBL059W  |                                                                                                        | membrane;mitochondrion         |                                                             | 0.468 | 0.212 | 0.45 |
| P42900 | Sigma-like sequence protein 1, mitochondrial [OS=Saccharomyces cerevisiae S288c]                    | 850830 | SLS1; YLR139C     | cell organization and biogenesis;metabolic process                                                     | membrane;mitochondrion         | protein binding                                             | 0.425 | 0.194 | 0.46 |
| P32839 | Mitochondrial chaperone BCS1 [OS=Saccharomyces cerevisiae S288c]                                    | 851981 | BCS1; YDR375C     | cell organization and biogenesis;metabolic process;response to stimulus;transport                      | cytosol;membrane;mitochondrion | catalytic activity;nucleotide binding;transporter activity  | 0.425 | 0.194 | 0.46 |
| Q08970 | Mitochondrial metal transporter 2 [OS=Saccharomyces cerevisiae S288c]                               | 855877 | MMT2; YPL224C     | cellular homeostasis;regulation of biological process;response to stimulus;transport                   | membrane;mitochondrion         | transporter activity                                        | 0.407 | 0.186 | 0.46 |
| P32266 | Dynamins-like GTPase MGM1, mitochondrial [OS=Saccharomyces cerevisiae S288c]                        | 854386 | MGM1; YOR211C     | cell organization and biogenesis                                                                       | membrane;mitochondrion         | catalytic activity;nucleotide binding;protein binding       | 0.389 | 0.179 | 0.46 |
| P03879 | Intron-encoded RNA maturase bI4 [OS=Saccharomyces cerevisiae S288c]                                 | 854582 | BI4; Q0120        | metabolic process                                                                                      | membrane;mitochondrion         | catalytic activity;RNA binding                              | 0.389 | 0.179 | 0.46 |
| Q05779 | Ubiquinone biosynthesis protein COQ9, mitochondrial [OS=Saccharomyces cerevisiae S288c]             | 850898 | COQ9; YLR201C     | metabolic process                                                                                      | membrane;mitochondrion         |                                                             | 0.359 | 0.166 | 0.46 |
| P36523 | 54S ribosomal protein L15, mitochondrial [OS=Saccharomyces cerevisiae S288c]                        | 851022 | MRPL15; YLR312W-A | cell organization and biogenesis;metabolic process                                                     | mitochondrion;ribosome         | catalytic activity;RNA binding;structural molecule activity | 0.334 | 0.155 | 0.46 |
| P81450 | ATP synthase subunit J, mitochondrial [OS=Saccharomyces cerevisiae S288c]                           | 854893 | ATP18; YML081C-A  | cell organization and biogenesis;metabolic process;transport                                           | membrane;mitochondrion         | catalytic activity;transporter activity                     | 4.623 | 2.162 | 0.47 |
| P25270 | rRNA methyltransferase 1, mitochondrial [OS=Saccharomyces cerevisiae S288c]                         | 854376 | MRM1; YOR201C     | metabolic process                                                                                      | mitochondrion                  | catalytic activity;RNA binding                              | 0.274 | 0.129 | 0.47 |
| P38122 | 3-methyl-2-oxobutanoate hydroxymethyltransferase [OS=Saccharomyces cerevisiae S288c]                | 852474 | ECM31; YBR176W    | metabolic process                                                                                      | mitochondrion                  | catalytic activity                                          | 0.259 | 0.122 | 0.47 |
| Q04689 | Altered inheritance of mitochondria protein 32 [OS=Saccharomyces cerevisiae S288c]                  | 854955 | AIM32; YML050W    |                                                                                                        |                                |                                                             | 0.233 | 0.11  | 0.47 |
| P43122 | tRNA N6-adenosine threonylcarbamoyltransferase, mitochondrial [OS=Saccharomyces cerevisiae S288c]   | 851454 | QRI7; YDL104C     | cell organization and biogenesis;metabolic process                                                     | mitochondrion                  | catalytic activity;metal ion binding                        | 0.212 | 0.101 | 0.48 |
| P38909 | cytochrome c mitochondrial import factor CYC2 [OS=Saccharomyces cerevisiae S288c]                   | 854202 | CYC2; YOR037W     | cell organization and biogenesis;metabolic process                                                     | membrane;mitochondrion         | catalytic activity                                          | 0.194 | 0.093 | 0.48 |
| P25626 | 54S ribosomal protein IMG1, mitochondrial [OS=Saccharomyces cerevisiae S288c]                       | 850413 | IMG1; YCR046C     | cell organization and biogenesis;metabolic process                                                     | mitochondrion;ribosome         | structural molecule activity                                | 3.924 | 1.894 | 0.48 |
| Q08818 | Meiotic sister-chromatid recombination protein 6, mitochondrial [OS=Saccharomyces cerevisiae S288c] | 854536 | MSC6; YOR354C     | metabolic process                                                                                      | mitochondrion;organelle lumen  | RNA binding                                                 | 1.047 | 0.506 | 0.48 |
| Q12204 | Probable phospholipase YOR022C, mitochondrial [OS=Saccharomyces cerevisiae S288c]                   | 854187 | YOR022C; YOR022C  | metabolic process                                                                                      | mitochondrion                  | catalytic activity;metal ion binding                        | 0.11  | 0.054 | 0.49 |
| P38771 | Ribosome-recycling factor, mitochondrial [OS=Saccharomyces cerevisiae S288c]                        | 856433 | RRF1; YHR038W     | cell organization and biogenesis;metabolic process                                                     | mitochondrion                  | RNA binding                                                 | 1.955 | 0.968 | 0.50 |
| P38969 | Pentamidine resistance factor, mitochondrial [OS=Saccharomyces cerevisiae S288c]                    | 854440 | PNT1; YOR266W     | cell organization and biogenesis;response to stimulus                                                  | membrane;mitochondrion         |                                                             | 0.711 | 0.359 | 0.50 |
| Q06405 | ATP synthase subunit f, mitochondrial [OS=Saccharomyces cerevisiae S288c]                           | 851983 | ATP17; YDR377W    | metabolic process;transport                                                                            | membrane;mitochondrion         | catalytic activity;transporter activity                     | 2.981 | 1.512 | 0.51 |
| Q08023 | Protein FMP25, mitochondrial [OS=Saccharomyces cerevisiae S288c]                                    | 850766 | FMP25; YLR077W    | cell organization and biogenesis                                                                       | membrane;mitochondrion         |                                                             | 1.412 | 0.719 | 0.51 |
| P25372 | Thioredoxin-3, mitochondrial [OS=Saccharomyces cerevisiae S288c]                                    | 850444 | TRX3; YCR083W     | cellular homeostasis;metabolic process;regulation of biological process;response to stimulus;transport | cytoplasm;mitochondrion        | catalytic activity                                          | 2.511 | 1.31  | 0.52 |
| P12686 | 37S ribosomal protein MRP13, mitochondrial [OS=Saccharomyces cerevisiae S288c]                      | 852975 | MRP13; YGR084C    | cell organization and biogenesis;metabolic process                                                     | mitochondrion;ribosome         | structural molecule activity                                | 0.778 | 0.413 | 0.53 |

|          |                                                                                                                |         |                      |                                                                                                        |                                              |                                                                           |        |       |      |
|----------|----------------------------------------------------------------------------------------------------------------|---------|----------------------|--------------------------------------------------------------------------------------------------------|----------------------------------------------|---------------------------------------------------------------------------|--------|-------|------|
| P36046   | Mitochondrial intermembrane space import and assembly protein 40 [OS=Saccharomyces cerevisiae S288c]           | 853639  | MIA40; YKL195W       | cellular component movement;metabolic process;response to stimulus;transport                           | membrane;mitochondrion                       | catalytic activity;protein binding;transporter activity                   | 2.914  | 1.555 | 0.53 |
| P53266   | Cytochrome oxidase assembly protein SHY1 [OS=Saccharomyces cerevisiae S288c]                                   | 853009  | SHY1; YGR112W        | cell organization and biogenesis                                                                       | membrane;mitochondrion                       | protein binding                                                           | 1.783  | 0.978 | 0.55 |
| P39006   | Phosphatidylserine decarboxylase proenzyme 1, mitochondrial [OS=Saccharomyces cerevisiae S288c]                | 855552  | PSD1; YNL169C        | metabolic process;regulation of biological process                                                     | membrane;mitochondrion                       | catalytic activity                                                        | 0.487  | 0.269 | 0.55 |
| P37267   | Assembly factor cbp4 [OS=Saccharomyces cerevisiae S288c]                                                       |         | CBP4                 | cell organization and biogenesis                                                                       | membrane;mitochondrion                       |                                                                           | 3.329  | 1.848 | 0.56 |
| P17558   | 37S ribosomal protein PET123, mitochondrial [OS=Saccharomyces cerevisiae S288c]                                | 854329  | PET123; YOR158W      | cell organization and biogenesis;metabolic process                                                     | mitochondrion;ribosome                       | structural molecule activity                                              | 2.594  | 1.448 | 0.56 |
| P37299   | cytochrome b-c1 complex subunit 10 [OS=Saccharomyces cerevisiae S288c]                                         | 856390  | QCR10; YHR001W-A     | metabolic process;transport                                                                            | membrane;mitochondrion                       | catalytic activity;transporter activity                                   | 5.31   | 2.981 | 0.56 |
| P19955   | 37S ribosomal protein YMR-31, mitochondrial [OS=Saccharomyces cerevisiae S288c]                                | 850610  | YMR31; YFR049W       | cell organization and biogenesis;metabolic process                                                     | mitochondrion;ribosome                       | catalytic activity;protein binding;structural molecule activity           | 15.681 | 9     | 0.57 |
| P53732   | 37S ribosomal protein S12, mitochondrial [OS=Saccharomyces cerevisiae S288c]                                   | 855772  | MRPS12; YNR036C      | cell organization and biogenesis;metabolic process                                                     | mitochondrion;ribosome                       | structural molecule activity                                              | 1.154  | 0.668 | 0.58 |
| Q04599   | 54S ribosomal protein L1, mitochondrial [OS=Saccharomyces cerevisiae S288c]                                    | 851694  | MRPL1; YDR116C       | cell organization and biogenesis;metabolic process                                                     | mitochondrion;ribosome                       | RNA binding;structural molecule activity                                  | 1.069  | 0.624 | 0.58 |
| P53724   | 54S ribosomal protein L50, mitochondrial [OS=Saccharomyces cerevisiae S288c]                                   | 855756  | MRPL50; YNR022C      | cell organization and biogenesis;metabolic process                                                     | mitochondrion;ribosome                       | structural molecule activity                                              | 0.995  | 0.585 | 0.59 |
| Q3E824   | Uncharacterized protein YOR020W-A [OS=Saccharomyces cerevisiae S288c]                                          | 1466480 | YOR020W-A; YOR020W-A | metabolic process;transport                                                                            | membrane;mitochondrion                       |                                                                           | 3.642  | 2.162 | 0.59 |
| P17695   | Glutaredoxin-2, mitochondrial [OS=Saccharomyces cerevisiae S288c]                                              | 852124  | GRX2; YDR513W        | cellular homeostasis;metabolic process;regulation of biological process;response to stimulus;transport | cytoplasm;cytosol;mitochondrion;nucleus      | antioxidant activity;catalytic activity                                   | 0.874  | 0.52  | 0.59 |
| P40086   | Cytochrome c oxidase assembly protein cox15 [OS=Saccharomyces cerevisiae S288c]                                | 856884  | COX15; YER141W       | cell organization and biogenesis;metabolic process;transport                                           | membrane;mitochondrion                       | catalytic activity;transporter activity                                   | 2.594  | 1.555 | 0.60 |
| Q03020   | iron sulfur cluster assembly protein 1, mitochondrial [OS=Saccharomyces cerevisiae S288c]                      | 855968  | ISU1; YPL135W        | cell organization and biogenesis;cellular homeostasis;metabolic process                                | cytoplasm;mitochondrion;organelle lumen      | catalytic activity;metal ion binding;protein binding                      | 0.778  | 0.468 | 0.60 |
| Q03799   | 37S ribosomal protein S8, mitochondrial [OS=Saccharomyces cerevisiae S288c]                                    | 855190  | MRPS8; YMR158W       | cell organization and biogenesis;metabolic process                                                     | mitochondrion;ribosome                       | structural molecule activity                                              | 0.701  | 0.425 | 0.61 |
| Q12375   | mitochondrial ornithine transporter 1 [OS=Saccharomyces cerevisiae S288c]                                      | 854297  | ORT1; YOR130C        | metabolic process;transport                                                                            | membrane;mitochondrion                       | structural molecule activity;transporter activity                         | 0.54   | 0.334 | 0.62 |
| P14693   | sorting assembly machinery 35 kDa subunit [OS=Saccharomyces cerevisiae S288c]                                  | 856483  | SAM35; YHR083W       | cell organization and biogenesis;transport                                                             | membrane;mitochondrion                       | protein binding                                                           | 0.54   | 0.334 | 0.62 |
| P00431   | cytochrome c peroxidase, mitochondrial [OS=Saccharomyces cerevisiae S288c]                                     | 853940  | CCP1; YKR066C        | metabolic process;response to stimulus                                                                 | mitochondrion;organelle lumen                | antioxidant activity;catalytic activity;metal ion binding;protein binding | 1.649  | 1.031 | 0.63 |
| P49954   | probable hydrolase NIT3 [OS=Saccharomyces cerevisiae S288c]                                                    | 851065  | NIT3; YLR351C        | metabolic process                                                                                      | cytoplasm;mitochondrion                      | catalytic activity                                                        | 0.438  | 0.274 | 0.63 |
| P32792   | UPF0744 protein YSC83 [OS=Saccharomyces cerevisiae S288c]                                                      | 856410  | YSC83; YHR017W       |                                                                                                        | membrane;mitochondrion                       |                                                                           | 0.369  | 0.233 | 0.63 |
| P37293   | N-terminal acetyltransferase 2 [OS=Saccharomyces cerevisiae S288c]                                             | 853050  | NAT2; YGR147C        | metabolic process                                                                                      | cytoplasm;mitochondrion                      | catalytic activity                                                        | 1.154  | 0.73  | 0.63 |
| Q08686   | Thiosulfate sulfurtransferase TUM1 [OS=Saccharomyces cerevisiae S288c]                                         | 854425  | TUM1; YOR251C        | metabolic process                                                                                      | cytoplasm;mitochondrion                      | catalytic activity;protein binding                                        | 0.334  | 0.212 | 0.63 |
| P40015   | inositol phosphosphingolipids phospholipase C [OS=Saccharomyces cerevisiae S288c]                              | 856739  | ISC1; YER019W        | metabolic process;response to stimulus                                                                 | endoplasmic reticulum;membrane;mitochondrion | catalytic activity;metal ion binding                                      | 0.334  | 0.212 | 0.63 |
| Q02883   | N-acyl-phosphatidylethanolamine-hydrolyzing phospholipase D, mitochondrial [OS=Saccharomyces cerevisiae S288c] | 856001  | FMP30; YPL103C       | metabolic process                                                                                      | membrane;mitochondrion                       | catalytic activity;metal ion binding                                      | 0.304  | 0.194 | 0.64 |
| Q01532-1 | Cysteine proteinase 1, mitochondrial [OS=Saccharomyces cerevisiae S288c]                                       |         | MCY1                 | metabolic process;regulation of biological process;response to stimulus                                | cytoplasm;mitochondrion                      | catalytic activity;DNA binding;RNA binding                                | 0.28   | 0.179 | 0.64 |
| Q03557   | Glutamyl-tRNA(Gln) amidotransferase subunit A,                                                                 | 855338  | HER2; YMR29          | cell organization and biogenesis;metabolic process                                                     | mitochondrion                                | catalytic activity;nucleotide                                             | 0.259  | 0.166 | 0.64 |

|        |                                                                                                  |            |                                           |                                                                                                                    |                                              |                                                                   |       |       |      |
|--------|--------------------------------------------------------------------------------------------------|------------|-------------------------------------------|--------------------------------------------------------------------------------------------------------------------|----------------------------------------------|-------------------------------------------------------------------|-------|-------|------|
|        | mitochondrial [OS=Saccharomyces cerevisiae S288c]                                                |            | 3C                                        |                                                                                                                    |                                              | binding                                                           |       |       |      |
| P07236 | Threonine-tRNA ligase, mitochondrial [OS=Saccharomyces cerevisiae S288c]                         | 8536<br>40 | MST1;<br>YKL194<br>C                      | metabolic process                                                                                                  | cytoplasm;mitochondrion;organelle lumen      | catalytic activity;nucleotide binding;RNA binding                 | 0.233 | 0.15  | 0.64 |
| P40159 | Uncharacterized protein YNL208W [OS=Saccharomyces cerevisiae S288c]                              | 8555<br>13 | YNL208<br>W;<br>YNL208<br>W               |                                                                                                                    | membrane;mitochondrion;ribosome              |                                                                   | 1.783 | 1.154 | 0.65 |
| P40008 | Protein FMP52, mitochondrial [OS=Saccharomyces cerevisiae S288c]                                 | 8567<br>21 | FMP52;<br>YER004<br>W                     |                                                                                                                    | endoplasmic reticulum;membrane;mitochondrion | catalytic activity                                                | 2.652 | 1.738 | 0.66 |
| Q03430 | 37S ribosomal protein RSM28, mitochondrial [OS=Saccharomyces cerevisiae S288c]                   | 8521<br>05 | RSM28<br>;<br>YDR49<br>4W                 | cell organization and biogenesis;metabolic process                                                                 | mitochondrion;ribosome                       | structural molecule activity                                      | 3.062 | 2.008 | 0.66 |
| Q06668 | Methyltransferase OMS1, mitochondrial [OS=Saccharomyces cerevisiae S288c]                        | 8519<br>11 | OMS1;<br>YDR31<br>6W                      | metabolic process                                                                                                  | membrane;mitochondrion                       | catalytic activity                                                | 0.585 | 0.389 | 0.66 |
| P23369 | 54S ribosomal protein L25, mitochondrial [OS=Saccharomyces cerevisiae S288c]                     | 8529<br>67 | MRPL2<br>5;<br>YGR07<br>6C                | cell organization and biogenesis;metabolic process                                                                 | mitochondrion;ribosome                       | structural molecule activity                                      | 1.31  | 0.874 | 0.67 |
| P32860 | NifU-like protein, mitochondrial [OS=Saccharomyces cerevisiae S288c]                             | 8538<br>26 | NFU1;<br>YKL040<br>C                      | cell organization and biogenesis;cellular homeostasis;metabolic process                                            | mitochondrion;organelle lumen                | metal ion binding                                                 | 3.87  | 2.652 | 0.69 |
| Q05892 | MIOREX complex component 2 [OS=Saccharomyces cerevisiae S288c]                                   | 8509<br>97 | YLR290<br>C;<br>COQ11<br>;<br>YLR290<br>C | metabolic process                                                                                                  | mitochondrion                                | catalytic activity                                                | 3.87  | 2.652 | 0.69 |
| P50087 | MICOS subunit MIC26 [OS=Saccharomyces cerevisiae S288c]                                          | 8531<br>50 | MOS2;<br>MIC26;<br>YGR23<br>5C            | cell organization and biogenesis                                                                                   | membrane;mitochondrion                       |                                                                   | 0.931 | 0.638 | 0.69 |
| P38172 | MIOREX complex component 3 [OS=Saccharomyces cerevisiae S288c]                                   | 8521<br>81 | YBL095<br>W;<br>MRX3;<br>YBL095<br>W      |                                                                                                                    | membrane;mitochondrion                       |                                                                   | 0.719 | 0.501 | 0.70 |
| P28737 | Protein MSP1 [OS=Saccharomyces cerevisiae S288c]                                                 | 8529<br>15 | MSP1;<br>YGR02<br>8W                      | cell organization and biogenesis;metabolic process;regulation of biological process;response to stimulus;transport | membrane;mitochondrion;nucleus               | catalytic activity;nucleotide binding;protein binding;RNA binding | 0.585 | 0.413 | 0.71 |
| Q12251 | Uncharacterized mitochondrial carrier YPR011C [OS=Saccharomyces cerevisiae S288c]                | 8561<br>21 | YPR011<br>C;<br>YPR011<br>C               | metabolic process;transport                                                                                        | membrane;mitochondrion                       | structural molecule activity;transporter activity                 | 0.551 | 0.389 | 0.71 |
| P38152 | Tricarboxylate transport protein [OS=Saccharomyces cerevisiae S288c]                             | 8525<br>94 | CTP1;<br>YBR291<br>C                      | metabolic process;transport                                                                                        | membrane;mitochondrion                       | structural molecule activity;transporter activity                 | 0.551 | 0.389 | 0.71 |
| P02381 | Ribosomal protein VAR1, mitochondrial [OS=Saccharomyces cerevisiae S288c]                        | 8545<br>86 | VAR1;<br>Q0140                            | cell organization and biogenesis;metabolic process                                                                 | mitochondrion;ribosome                       | structural molecule activity                                      | 0.52  | 0.369 | 0.71 |
| P38702 | mitochondrial carrier protein LEU5 [OS=Saccharomyces cerevisiae S288c]                           | 8563<br>91 | LEU5;<br>YHR00<br>2W                      | metabolic process;transport                                                                                        | membrane;mitochondrion                       | structural molecule activity;transporter activity                 | 0.468 | 0.334 | 0.71 |
| P53230 | Phosphatidate cytidyltransferase, mitochondrial [OS=Saccharomyces cerevisiae S288c]              | 8529<br>37 | TAM41<br>;<br>YGR04<br>6W                 | metabolic process                                                                                                  | membrane;mitochondrion;organelle lumen       | catalytic activity                                                | 0.407 | 0.292 | 0.72 |
| P54003 | Protein SUR7 [OS=Saccharomyces cerevisiae S288c]                                                 | 8549<br>53 | SUR7;<br>YML05<br>2W                      | cell differentiation;transport                                                                                     | membrane;mitochondrion                       |                                                                   | 1.154 | 0.848 | 0.73 |
| Q12283 | Malonyl CoA-acyl carrier protein transacylase, mitochondrial [OS=Saccharomyces cerevisiae S288c] | 8543<br>96 | MCT1;<br>YOR22<br>1C                      | metabolic process                                                                                                  | mitochondrion                                | catalytic activity                                                | 0.896 | 0.668 | 0.75 |
| P36521 | 54S ribosomal protein L11, mitochondrial [OS=Saccharomyces cerevisiae S288c]                     | 8513<br>25 | MRPL1<br>1;<br>YDL202<br>W                | cell organization and biogenesis;metabolic process                                                                 | mitochondrion;ribosome                       | structural molecule activity                                      | 0.833 | 0.624 | 0.75 |
| P43617 | Uncharacterized mitochondrial carrier YFR045W [OS=Saccharomyces cerevisiae S288c]                | 8506<br>06 | YFR045<br>W;<br>YFR045<br>W               | metabolic process;transport                                                                                        | membrane;mitochondrion                       | structural molecule activity;transporter activity                 | 0.778 | 0.585 | 0.75 |
| P36534 | 54S ribosomal protein L40, mitochondrial [OS=Saccharomyces cerevisiae S288c]                     | 8559<br>30 | MRPL4<br>0;<br>YPL173<br>W                | cell organization and biogenesis;metabolic process                                                                 | mitochondrion;ribosome                       | protein binding;structural molecule activity                      | 0.778 | 0.585 | 0.75 |
| P38300 | Inner membrane mitoribosome receptor MBA1, mitochondrial [OS=Saccharomyces cerevisiae S288c]     | 8524<br>83 | MBA1;<br>YBR185<br>C                      | cell organization and biogenesis;regulation of biological process                                                  | membrane;mitochondrion                       |                                                                   | 0.778 | 0.585 | 0.75 |
| P38072 | Protein SCO2, mitochondrial [OS=Saccharomyces cerevisiae S288c]                                  | 8523<br>12 | SCO2;<br>YBR024<br>W                      | cell organization and biogenesis;cellular homeostasis;metabolic process;transport                                  | membrane;mitochondrion                       | antioxidant activity;catalytic activity;metal ion binding         | 0.73  | 0.551 | 0.75 |

|        |                                                                                                           |        |                        |                                                                                   |                                              |                                                                         |       |       |      |
|--------|-----------------------------------------------------------------------------------------------------------|--------|------------------------|-----------------------------------------------------------------------------------|----------------------------------------------|-------------------------------------------------------------------------|-------|-------|------|
| P15179 | Aspartate--tRNA ligase, mitochondrial [OS=Saccharomyces cerevisiae S288c]                                 | 856000 | MSD1; YPL104W          | metabolic process                                                                 | cytoplasm;mitochondrion;organelle lumen      | catalytic activity;nucleotide binding                                   | 0.708 | 0.535 | 0.76 |
| P00427 | Cytochrome c oxidase subunit 6, mitochondrial [OS=Saccharomyces cerevisiae S288c]                         | 856448 | COX6; YHR051W          | metabolic process;transport                                                       | membrane;mitochondrion                       | catalytic activity;metal ion binding;transporter activity               | 2.831 | 2.162 | 0.76 |
| Q05931 | Heat shock protein SSQ1, mitochondrial [OS=Saccharomyces cerevisiae S288c]                                | 851084 | SSQ1; YLR369W          | cell organization and biogenesis;metabolic process                                | mitochondrion;organelle lumen                | nucleotide binding;protein binding                                      | 0.884 | 0.679 | 0.77 |
| P53326 | Uncharacterized protein YGR266W [OS=Saccharomyces cerevisiae S288c]                                       | 853182 | YGR266W; YGR266W       |                                                                                   | membrane;mitochondrion                       |                                                                         | 0.778 | 0.602 | 0.77 |
| P40508 | Uncharacterized protein YIL077C [OS=Saccharomyces cerevisiae S288c]                                       | 854733 | YIL077C; YIL077C       |                                                                                   | mitochondrion                                |                                                                         | 1.154 | 0.896 | 0.78 |
| P25038 | Translation initiation factor IF-2, mitochondrial [OS=Saccharomyces cerevisiae S288c]                     | 854135 | IFM1; YOL023W          | cell organization and biogenesis;metabolic process                                | mitochondrion;nucleus                        | catalytic activity;nucleotide binding;RNA binding                       | 0.299 | 0.233 | 0.78 |
| Q01217 | Protein ARG5,6, mitochondrial [OS=Saccharomyces cerevisiae S288c]                                         | 856800 | ARG5,6; YER069W        | metabolic process;regulation of biological process                                | cytoplasm;mitochondrion;organelle lumen      | catalytic activity;nucleotide binding;protein binding                   | 0.233 | 0.182 | 0.78 |
| Q07349 | MIOREX complex component 9 [OS=Saccharomyces cerevisiae S288c]                                            | 851535 | YDL027C; MRX9; YDL027C |                                                                                   | endoplasmic reticulum;membrane;mitochondrion |                                                                         | 2.433 | 1.913 | 0.79 |
| P40012 | protoporphyrinogen oxidase [OS=Saccharomyces cerevisiae S288c]                                            | 856733 | HEM14; YER014W         | metabolic process                                                                 | membrane;mitochondrion                       | catalytic activity                                                      | 1.198 | 0.947 | 0.79 |
| P36101 | tRNA threonylcarbamoyladenine dehydratase 2 [OS=Saccharomyces cerevisiae S288c]                           | 853841 | TCD2; YKL027W; YKL027W | metabolic process                                                                 | cytosol;membrane;mitochondrion               | catalytic activity;nucleotide binding                                   | 0.778 | 0.616 | 0.79 |
| Q00055 | Glycerol-3-phosphate dehydrogenase [NAD(+)] 1 [OS=Saccharomyces cerevisiae S288c]                         | 851539 | GPD1; YDL022W          | cell organization and biogenesis;cellular homeostasis;metabolic process;transport | cytoplasm;cytosol;mitochondrion;nucleus      | catalytic activity;nucleotide binding;protein binding                   | 0.738 | 0.585 | 0.79 |
| Q08968 | UPF0061 protein FMP40 [OS=Saccharomyces cerevisiae S288c]                                                 | 855879 | FMP40; YPL222W         |                                                                                   | mitochondrion                                | protein binding                                                         | 2.162 | 1.721 | 0.80 |
| P39525 | 3-oxoacyl-[acyl-carrier-protein] synthase homolog [OS=Saccharomyces cerevisiae S288c]                     | 856790 | CEM1; YER061C          | metabolic process                                                                 | mitochondrion                                | catalytic activity                                                      | 1.081 | 0.874 | 0.81 |
| P00950 | Phosphoglycerate mutase 1 [OS=Saccharomyces cerevisiae S288c]                                             | 853705 | GPM1; YKL152C          | metabolic process;regulation of biological process                                | cytoplasm;cytosol;membrane;mitochondrion     | catalytic activity                                                      | 2.981 | 2.415 | 0.81 |
| P39925 | Mitochondrial respiratory chain complexes assembly protein AFG3 [OS=Saccharomyces cerevisiae S288c]       | 856737 | AFG3; YER017C          | cell organization and biogenesis;metabolic process;response to stimulus;transport | membrane;mitochondrion                       | catalytic activity;metal ion binding;nucleotide binding;protein binding | 1.015 | 0.823 | 0.81 |
| P38297 | Mitofusin FZO1 [OS=Saccharomyces cerevisiae S288c]                                                        | 852477 | FZO1; YBR179C          | cell organization and biogenesis                                                  | membrane;mitochondrion                       | catalytic activity;nucleotide binding;protein binding                   | 0.304 | 0.248 | 0.82 |
| P51998 | 54S ribosomal protein yml6, mitochondrial [OS=Saccharomyces cerevisiae S288c]                             | 854983 | YML6; YML025C          | cell organization and biogenesis;metabolic process                                | mitochondrion;ribosome                       | RNA binding;structural molecule activity                                | 1.404 | 1.154 | 0.82 |
| Q04728 | Arginine biosynthesis bifunctional protein ArgJ, mitochondrial [OS=Saccharomyces cerevisiae S288c]        | 855084 | ARG7; YMR062C          | metabolic process                                                                 | mitochondrion;organelle lumen                | catalytic activity                                                      | 0.63  | 0.52  | 0.83 |
| P39987 | Heat shock protein SSC3, mitochondrial [OS=Saccharomyces cerevisiae S288c]                                | 856682 | ECM10; YEL030W         | cell organization and biogenesis;metabolic process;transport                      | mitochondrion                                | nucleotide binding;protein binding                                      | 1.976 | 1.637 | 0.83 |
| P40053 | Altered inheritance of mitochondria protein 9, mitochondrial [OS=Saccharomyces cerevisiae S288c]          | 856813 | AIM9; YER080W          |                                                                                   | mitochondrion                                |                                                                         | 4.036 | 3.348 | 0.83 |
| P32332 | Mitochondrial oxaloacetate transport protein [OS=Saccharomyces cerevisiae S288c]                          | 853739 | OAC1; YKL120W          | metabolic process;transport                                                       | membrane;mitochondrion                       | structural molecule activity;transporter activity                       | 2.594 | 2.162 | 0.83 |
| P53881 | 54S ribosomal protein L22, mitochondrial [OS=Saccharomyces cerevisiae S288c]                              | 855544 | MRPL22; YNL177C        | cell organization and biogenesis;metabolic process                                | mitochondrion;ribosome                       | RNA binding;structural molecule activity                                | 1.683 | 1.404 | 0.83 |
| P32795 | Mitochondrial inner membrane l-AAA protease supercomplex subunit YME1 [OS=Saccharomyces cerevisiae S288c] | 856135 | YME1; YPR024W          | metabolic process;response to stimulus;transport                                  | membrane;mitochondrion                       | catalytic activity;metal ion binding;nucleotide binding;protein binding | 1.3   | 1.085 | 0.83 |
| Q12029 | Probable mitochondrial transport protein fsf1 [OS=Saccharomyces cerevisiae S288c]                         | 85445  | FSF1; YOR271C          | transport                                                                         | membrane;mitochondrion                       | transporter activity                                                    | 2.793 | 2.36  | 0.84 |



|        |                                                                                                                |        |                        |                                                                                   |                                 |                                                                           |        |        |      |
|--------|----------------------------------------------------------------------------------------------------------------|--------|------------------------|-----------------------------------------------------------------------------------|---------------------------------|---------------------------------------------------------------------------|--------|--------|------|
| P15424 | ATP-dependent RNA helicase MSS116, mitochondrial [OS=Saccharomyces cerevisiae S288c]                           | 851775 | MSS116; YDR194C        | metabolic process;regulation of biological process                                | mitochondrion;organelle lumen   | catalytic activity;nucleotide binding;RNA binding                         | 1.783  | 1.512  | 0.85 |
| P47052 | succinate dehydrogenase [ubiquinone] flavoprotein subunit 2, mitochondrial [OS=Saccharomyces cerevisiae S288c] | 853405 | YJL045W; YJL045W       | metabolic process;transport                                                       | membrane;mitochondrion          | catalytic activity;nucleotide binding                                     | 4.043  | 3.453  | 0.85 |
| P25605 | Acetolactate synthase small subunit, mitochondrial [OS=Saccharomyces cerevisiae S288c]                         | 850348 | ILV6; YCL009C          | metabolic process;regulation of biological process                                | mitochondrion                   | catalytic activity;enzyme regulator activity                              | 10.288 | 9      | 0.87 |
| P53598 | Succinyl-CoA ligase [ADP-forming] subunit alpha, mitochondrial [OS=Saccharomyces cerevisiae S288c]             | 854310 | LSC1; YOR142W          | metabolic process                                                                 | cytosol;mitochondrion           | catalytic activity;nucleotide binding                                     | 13.384 | 11.743 | 0.88 |
| P33311 | ATP-dependent permease MDL2, mitochondrial [OS=Saccharomyces cerevisiae S288c]                                 | 855858 | MDL2; YPL270W          | response to stimulus;transport                                                    | membrane;mitochondrion          | catalytic activity;nucleotide binding;transporter activity                | 1.006  | 0.901  | 0.90 |
| P53140 | Protein RMD9, mitochondrial [OS=Saccharomyces cerevisiae S288c]                                                | 852771 | RMD9; YGL107C          | cell differentiation;metabolic process;regulation of biological process           | membrane;mitochondrion          | RNA binding                                                               | 1.154  | 1.047  | 0.91 |
| P32843 | Mitochondrial escape protein 2 [OS=Saccharomyces cerevisiae S288c]                                             | 855348 | YME2; YMR302C          | cell organization and biogenesis;metabolic process                                | membrane;mitochondrion          | nucleotide binding;RNA binding                                            | 3.458  | 3.281  | 0.95 |
| P00927 | Threonine dehydratase, mitochondrial [OS=Saccharomyces cerevisiae S288c]                                       | 856819 | ILV1; YER086W          | metabolic process                                                                 | cytoplasm;mitochondrion         | catalytic activity                                                        | 2.257  | 2.257  | 1.00 |
| P07143 | Cytochrome c1, heme protein, mitochondrial [OS=Saccharomyces cerevisiae S288c]                                 | 854231 | CYT1; YOR065W          | metabolic process;transport                                                       | cytosol;membrane;mitochondrion  | metal ion binding                                                         | 13.251 | 13.251 | 1.00 |
| P38071 | Enoyl-[acyl-carrier protein] reductase [NADPH, B-specific], mitochondrial [OS=Saccharomyces cerevisiae S288c]  | 852314 | ETR1; YBR026C          | metabolic process                                                                 | mitochondrion;organelle lumen   | catalytic activity;DNA binding;metal ion binding                          | 9      | 9      | 1.00 |
| P43567 | alanine-glyoxylate aminotransferase 1 [OS=Saccharomyces cerevisiae S288c]                                      | 850514 | AGX1; YFL030W          | metabolic process                                                                 | cytosol;mitochondrion           | catalytic activity                                                        | 2.162  | 2.162  | 1.00 |
| P07806 | Valine--tRNA ligase, mitochondrial [OS=Saccharomyces cerevisiae S288c]                                         | 852986 | VAS1; YGR094W          | metabolic process;regulation of biological process                                | cytoplasm;cytosol;mitochondrion | catalytic activity;nucleotide binding                                     | 0.668  | 0.668  | 1.00 |
| P25374 | Cysteine desulfurase, mitochondrial [OS=Saccharomyces cerevisiae S288c]                                        | 850343 | NFS1; YCL017C          | cell organization and biogenesis;cellular homeostasis;metabolic process           | mitochondrion;nucleus           | catalytic activity;metal ion binding;protein binding                      | 2.3    | 2.3    | 1.00 |
| P32787 | Mitochondrial genome maintenance protein MGM101 [OS=Saccharomyces cerevisiae S288c]                            | 853609 | MGM101; YJR144W        | cell organization and biogenesis;metabolic process;response to stimulus           | chromosome;mitochondrion        | DNA binding                                                               | 3.281  | 3.281  | 1.00 |
| P40098 | uncharacterized mitochondrial membrane protein FMP10 [OS=Saccharomyces cerevisiae S288c]                       | 856931 | FMP10; YER182W         |                                                                                   | membrane;mitochondrion          |                                                                           | 4.456  | 4.456  | 1.00 |
| P32897 | Mitochondrial import inner membrane translocase subunit tim23 [OS=Saccharomyces cerevisiae S288c]              | 855751 | TIM23; YNR017W         | transport                                                                         | membrane;mitochondrion          | protein binding;transporter activity                                      | 4.012  | 4.012  | 1.00 |
| Q06892 | NADH kinase POS5, mitochondrial [OS=Saccharomyces cerevisiae S288c]                                            | 855913 | POS5; YPL188W          | metabolic process;response to stimulus                                            | mitochondrion;organelle lumen   | catalytic activity;nucleotide binding                                     | 1.565  | 1.565  | 1.00 |
| P32317 | Protein AFG1 [OS=Saccharomyces cerevisiae S288c]                                                               | 856658 | AFG1; YEL052W          | cell organization and biogenesis;metabolic process;response to stimulus;transport | membrane;mitochondrion          | catalytic activity;nucleotide binding                                     | 1.154  | 1.154  | 1.00 |
| P46681 | D-lactate dehydrogenase [cytochrome] 2, mitochondrial [OS=Saccharomyces cerevisiae S288c]                      | 851376 | DLD2; YDL178W          | metabolic process                                                                 | mitochondrion;organelle lumen   | catalytic activity;nucleotide binding;protein binding                     | 1.264  | 1.264  | 1.00 |
| P00410 | Cytochrome c oxidase subunit 2 [OS=Saccharomyces cerevisiae S288c]                                             | 854622 | COX2; Q0250            | metabolic process;transport                                                       | membrane;mitochondrion          | catalytic activity;metal ion binding;protein binding;transporter activity | 3.642  | 3.642  | 1.00 |
| P53721 | Respiratory supercomplex factor 2, mitochondrial [OS=Saccharomyces cerevisiae S288c]                           | 855752 | RCF2; YNR018W          | cell organization and biogenesis                                                  | membrane;mitochondrion          |                                                                           | 7.111  | 7.111  | 1.00 |
| P40513 | Mitochondrial acidic protein MAM33 [OS=Saccharomyces cerevisiae S288c]                                         | 854740 | MAM33; YIL070C         | metabolic process;regulation of biological process                                | mitochondrion;organelle lumen   | translation regulator activity                                            | 2.831  | 2.831  | 1.00 |
| P12687 | 54S ribosomal protein L2, mitochondrial [OS=Saccharomyces cerevisiae S288c]                                    | 855727 | MRP7; YNL005C          | cell organization and biogenesis;metabolic process                                | mitochondrion;ribosome          | catalytic activity;RNA binding;structural molecule activity               | 1.848  | 1.848  | 1.00 |
| P40364 | Mitochondrial peculiar membrane protein 1 [OS=Saccharomyces cerevisiae S288c]                                  | 853379 | MPM1; YJL066C          |                                                                                   | membrane;mitochondrion          |                                                                           | 1.512  | 1.512  | 1.00 |
| Q06567 | ABC1 family protein MCP2 [OS=Saccharomyces cerevisiae S288c]                                                   | 850955 | YLR253W; MCP2; YLR253W | cell organization and biogenesis                                                  | membrane;mitochondrion          |                                                                           | 0.389  | 0.389  | 1.00 |

|        |                                                                                                            |        |                        |                                                                         |                                               |                                                                             |       |       |      |
|--------|------------------------------------------------------------------------------------------------------------|--------|------------------------|-------------------------------------------------------------------------|-----------------------------------------------|-----------------------------------------------------------------------------|-------|-------|------|
| P36151 | Uncharacterized protein YKR070W [OS=Saccharomyces cerevisiae S288c]                                        | 853944 | YKR070W; YKR070W       | metabolic process                                                       | mitochondrion                                 |                                                                             | 1.336 | 1.336 | 1.00 |
| P38523 | GrpE protein homolog, mitochondrial [OS=Saccharomyces cerevisiae S288c]                                    | 854407 | MGE1; YOR232W          | metabolic process;regulation of biological process;transport            | membrane;mitochondrion;organelle lumen        | enzyme regulator activity;nucleotide binding;protein binding                | 0.833 | 0.833 | 1.00 |
| P28817 | 3-hydroxyisobutyryl-CoA hydrolase, mitochondrial [OS=Saccharomyces cerevisiae S288c]                       | 851606 | EHD3; YDR036C          | metabolic process                                                       | mitochondrion                                 | catalytic activity                                                          | 0.743 | 0.743 | 1.00 |
| P36520 | 54S ribosomal protein L10, mitochondrial [OS=Saccharomyces cerevisiae S288c]                               | 855436 | MRPL10; YNL284C        | cell organization and biogenesis;metabolic process                      | mitochondrion;ribosome                        | structural molecule activity                                                | 0.73  | 0.73  | 1.00 |
| P28625 | Protein YIM1 [OS=Saccharomyces cerevisiae S288c]                                                           | 855183 | YIM1; YMR152W          | metabolic process;response to stimulus                                  | cytoplasm;endoplasmic reticulum;mitochondrion | catalytic activity;metal ion binding                                        | 1.069 | 1.069 | 1.00 |
| P32904 | 54S ribosomal protein L6, mitochondrial [OS=Saccharomyces cerevisiae S288c]                                | 856552 | MRPL6; YHR147C         | cell organization and biogenesis;metabolic process                      | mitochondrion;ribosome                        | RNA binding;structural molecule activity                                    | 1.054 | 1.054 | 1.00 |
| P53969 | Sorting assembly machinery 50 kDa subunit [OS=Saccharomyces cerevisiae S288c]                              | 855705 | SAM50; YNL026W         | cell organization and biogenesis;transport                              | membrane;mitochondrion                        | protein binding;transporter activity                                        | 0.61  | 0.61  | 1.00 |
| P53736 | Uncharacterized protein YNR040W [OS=Saccharomyces cerevisiae S288c]                                        | 855776 | YNR040W; YNR040W       |                                                                         | mitochondrion                                 |                                                                             | 0.73  | 0.73  | 1.00 |
| P38797 | Protein phosphatase 2C homolog 7, mitochondrial [OS=Saccharomyces cerevisiae S288c]                        | 856475 | PTC7; YHR076W          | metabolic process                                                       | mitochondrion                                 | catalytic activity;metal ion binding;protein binding                        | 0.874 | 0.874 | 1.00 |
| P00401 | Cytochrome c oxidase subunit 1 [OS=Saccharomyces cerevisiae S288c]                                         | 854598 | COX1; Q0045            | metabolic process;transport                                             | membrane;mitochondrion                        | catalytic activity;metal ion binding;transporter activity                   | 1.61  | 1.61  | 1.00 |
| P32611 | 54S ribosomal protein RML2, mitochondrial [OS=Saccharomyces cerevisiae S288c]                              | 856660 | RML2; YEL050C          | cell organization and biogenesis;metabolic process                      | mitochondrion;ribosome                        | catalytic activity;RNA binding;structural molecule activity                 | 0.638 | 0.638 | 1.00 |
| P40502 | Altered inheritance of mitochondria protein 19, mitochondrial [OS=Saccharomyces cerevisiae S288c]          | 854722 | AIM19; YL087C          |                                                                         | membrane;mitochondrion                        |                                                                             | 1.512 | 1.512 | 1.00 |
| Q02204 | 54S ribosomal protein L13, mitochondrial [OS=Saccharomyces cerevisiae S288c]                               | 853875 | MRPL13; YKR006C        | cell organization and biogenesis;metabolic process                      | mitochondrion;ribosome                        | structural molecule activity                                                | 0.778 | 0.778 | 1.00 |
| P50945 | MICOS complex subunit MIC27 [OS=Saccharomyces cerevisiae S288c]                                            | 855623 | AIM37; MIC27; YNL100W  | cell organization and biogenesis                                        | membrane;mitochondrion                        |                                                                             | 0.968 | 0.968 | 1.00 |
| Q03327 | Mitochondrial fusion and transport protein Ugo1 [OS=Saccharomyces cerevisiae S288c]                        | 852081 | UGO1; YDR470C          | cell organization and biogenesis;metabolic process                      | membrane;mitochondrion                        | protein binding;structural molecule activity                                | 0.557 | 0.557 | 1.00 |
| Q12233 | ATP synthase subunit g, mitochondrial [OS=Saccharomyces cerevisiae S288c]                                  | 856131 | ATP20; YPR020W         | cell organization and biogenesis;metabolic process;transport            | membrane;mitochondrion                        | catalytic activity;transporter activity                                     | 1.371 | 1.371 | 1.00 |
| P32387 | 54S ribosomal protein L41, mitochondrial [OS=Saccharomyces cerevisiae S288c]                               | 852014 | MRP20; YDR405W         | cell organization and biogenesis;metabolic process                      | mitochondrion;ribosome                        | nucleotide binding;protein binding;RNA binding;structural molecule activity | 0.719 | 0.719 | 1.00 |
| P36147 | Presequence translocated-associated motor subunit pam17, mitochondrial [OS=Saccharomyces cerevisiae S288c] | 853939 | PAM17; YKR065C         | transport                                                               | membrane;mitochondrion                        |                                                                             | 1.371 | 1.371 | 1.00 |
| P27697 | Atypical kinase COQ8, mitochondrial [OS=Saccharomyces cerevisiae S288c]                                    | 852758 | COQ8; YGL119W          | metabolic process                                                       | membrane;mitochondrion;organelle lumen        | catalytic activity;nucleotide binding                                       | 0.365 | 0.365 | 1.00 |
| Q96VH5 | MICOS complex subunit Mic10 [OS=Saccharomyces cerevisiae S288c]                                            | 850300 | MOS1; MIC10; YCL057C-A | cell organization and biogenesis                                        | membrane;mitochondrion                        |                                                                             | 1.683 | 1.683 | 1.00 |
| P35996 | 54S ribosomal protein L38, mitochondrial [OS=Saccharomyces cerevisiae S288c]                               | 853684 | MRPL38; YKL170W        | cell organization and biogenesis;metabolic process                      | mitochondrion;ribosome                        | RNA binding;structural molecule activity                                    | 1.154 | 1.154 | 1.00 |
| P53311 | Mitochondrial pyruvate carrier 3 [OS=Saccharomyces cerevisiae S288c]                                       | 853158 | FMP43; MPC3; YGR243W   | transport                                                               | membrane;mitochondrion                        | transporter activity                                                        | 1.154 | 1.154 | 1.00 |
| Q03246 | 37S ribosomal protein S17, mitochondrial [OS=Saccharomyces cerevisiae S288c]                               | 855226 | MRPS17; YMR188C        | cell differentiation;cell organization and biogenesis;metabolic process | mitochondrion;ribosome                        | RNA binding;structural molecule activity                                    | 0.931 | 0.931 | 1.00 |
| Q04172 | Sensitive to high expression protein 9, mitochondrial [OS=Saccharomyces cerevisiae S288c]                  | 852002 | SHE9; YDR393W          | cell organization and biogenesis                                        | membrane;mitochondrion                        |                                                                             | 0.269 | 0.269 | 1.00 |

|          |                                                                                                              |            |                             |                                                                                                          |                                              |                                                                              |       |       |      |
|----------|--------------------------------------------------------------------------------------------------------------|------------|-----------------------------|----------------------------------------------------------------------------------------------------------|----------------------------------------------|------------------------------------------------------------------------------|-------|-------|------|
| P41911   | Glycerol-3-phosphate dehydrogenase [NAD(+)] 2, mitochondrial [OS=Saccharomyces cerevisiae S288c]             | 8540<br>95 | GPD2;<br>YOL059<br>W        | metabolic process                                                                                        | cytoplasm;cytosol;mitochondrion              | catalytic activity;nucleotide binding;protein binding                        | 0.292 | 0.292 | 1.00 |
| P36519   | 54S ribosomal protein L7, mitochondrial [OS=Saccharomyces cerevisiae S288c]                                  | 8518<br>23 | MRPL7;<br>YDR23<br>7W       | cell organization and biogenesis;metabolic process                                                       | mitochondrion;ribosome                       | RNA binding;structural molecule activity                                     | 0.468 | 0.468 | 1.00 |
| P33421   | Succinate dehydrogenase [ubiquinone] cytochrome b subunit, mitochondrial [OS=Saccharomyces cerevisiae S288c] | 8537<br>16 | SDH3;<br>YKL141<br>W        | cell organization and biogenesis;metabolic process;transport                                             | membrane;mitochondrion                       | catalytic activity;metal ion binding                                         | 1.276 | 1.276 | 1.00 |
| P33759   | 37S ribosomal protein S5, mitochondrial [OS=Saccharomyces cerevisiae S288c]                                  | 8525<br>53 | MRP55<br>;<br>YBR251<br>W   | cell organization and biogenesis;metabolic process                                                       | mitochondrion;ribosome                       | RNA binding;structural molecule activity                                     | 0.413 | 0.413 | 1.00 |
| P36526   | 54S ribosomal protein L27, mitochondrial [OS=Saccharomyces cerevisiae S288c]                                 | 8525<br>85 | MRPL2<br>7;<br>YBR282<br>W  | cell organization and biogenesis;metabolic process                                                       | mitochondrion;ribosome                       | structural molecule activity                                                 | 1.512 | 1.512 | 1.00 |
| Q99297   | Mitochondrial 2-oxodicarboxylate carrier 2 [OS=Saccharomyces cerevisiae S288c]                               | 8543<br>97 | ODC2;<br>YOR22<br>2W        | metabolic process;transport                                                                              | membrane;mitochondrion                       | structural molecule activity;transporter activity                            | 0.778 | 0.778 | 1.00 |
| Q12298   | uncharacterized ABC transporter ATP-binding protein YDR061W [OS=Saccharomyces cerevisiae S288c]              | 8516<br>33 | YDR06<br>1W;<br>YDR06<br>1W |                                                                                                          | mitochondrion                                | catalytic activity;nucleotide binding                                        | 0.266 | 0.266 | 1.00 |
| P21306   | ATP synthase subunit epsilon, mitochondrial [OS=Saccharomyces cerevisiae S288c]                              | 8558<br>57 | ATP15;<br>YPL271<br>W       | metabolic process;transport                                                                              | membrane;mitochondrion                       | catalytic activity;transporter activity                                      | 2.162 | 2.162 | 1.00 |
| P18409   | Mitochondrial distribution and morphology protein 10 [OS=Saccharomyces cerevisiae S288c]                     | 8512<br>23 | MDM1<br>0;<br>YAL010<br>C   | cell organization and biogenesis;transport                                                               | membrane;mitochondrion                       | protein binding                                                              | 0.16  | 0.16  | 1.00 |
| P25345   | Asparagine--tRNA ligase, mitochondrial [OS=Saccharomyces cerevisiae S288c]                                   | 8503<br>88 | SLM5;<br>YCR024<br>C        | metabolic process                                                                                        | cytoplasm;mitochondrion;organelle lumen      | catalytic activity;nucleotide binding                                        | 0.172 | 0.172 | 1.00 |
| P25348   | 54S ribosomal protein L32, mitochondrial [OS=Saccharomyces cerevisiae S288c]                                 | 8503<br>59 | MRPL3<br>2;<br>YCR003<br>W  | cell organization and biogenesis;metabolic process                                                       | membrane;mitochondrion;ribosome              | RNA binding;structural molecule activity                                     | 0.389 | 0.389 | 1.00 |
| P34222   | Peptidyl-tRNA hydrolase 2 [OS=Saccharomyces cerevisiae S288c]                                                | 8522<br>23 | PTH2;<br>YBL057<br>C        | regulation of biological process                                                                         | cytoplasm;cytosol;membrane;mitochondrion     | catalytic activity;protein binding                                           | 0.425 | 0.425 | 1.00 |
| Q06630   | Mitochondrial homologous recombination protein 1 [OS=Saccharomyces cerevisiae S288c]                         | 8518<br>90 | MHR1;<br>YDR29<br>6W        | cell organization and biogenesis;metabolic process;regulation of biological process;response to stimulus | mitochondrion;nucleus                        | catalytic activity;DNA binding;structural molecule activity                  | 0.359 | 0.359 | 1.00 |
| Q06510   | Lysophosphatidylcholine acyltransferase [OS=Saccharomyces cerevisiae S288c]                                  | 8562<br>62 | TAZ1;<br>YPR140<br>W        | cell organization and biogenesis;metabolic process;transport                                             | membrane;mitochondrion                       | catalytic activity                                                           | 0.194 | 0.194 | 1.00 |
| P38860   | GTPase MTG2, mitochondrial [OS=Saccharomyces cerevisiae S288c]                                               | 8565<br>73 | MTG2;<br>YHR16<br>8W        | metabolic process;transport                                                                              | membrane;mitochondrion                       | catalytic activity;metal ion binding;nucleotide binding;transporter activity | 0.07  | 0.07  | 1.00 |
| Q07914   | mitochondrial import inner membrane translocase subunit TIM14 [OS=Saccharomyces cerevisiae S288c]            | 8506<br>94 | PAM18<br>;<br>YLR008<br>C   | regulation of biological process;transport                                                               | membrane;mitochondrion                       | enzyme regulator activity;protein binding;transporter activity               | 0.778 | 0.778 | 1.00 |
| P47150   | 37S ribosomal protein S7, mitochondrial [OS=Saccharomyces cerevisiae S288c]                                  | 8535<br>78 | RSM7;<br>YJR113<br>C        | cell organization and biogenesis;metabolic process                                                       | mitochondrion;ribosome                       | RNA binding;structural molecule activity                                     | 0.334 | 0.334 | 1.00 |
| P32606   | putative mitochondrial translation system component PET127 [OS=Saccharomyces cerevisiae S288c]               | 8541<br>82 | PET127<br>;<br>YOR01<br>7W  | cell organization and biogenesis;metabolic process;regulation of biological process                      | mitochondrion                                |                                                                              | 0.099 | 0.099 | 1.00 |
| Q05867   | Uncharacterized protein YLR283W, mitochondrial [OS=Saccharomyces cerevisiae S288c]                           | 8509<br>88 | YLR283<br>W;<br>YLR283<br>W |                                                                                                          | endoplasmic reticulum;membrane;mitochondrion |                                                                              | 0.11  | 0.11  | 1.00 |
| P38720   | 6-phosphogluconate dehydrogenase, decarboxylating 1 [OS=Saccharomyces cerevisiae S288c]                      | 8565<br>89 | GND1;<br>YHR18<br>3W        | metabolic process;response to stimulus                                                                   | cytoplasm;mitochondrion                      | catalytic activity                                                           | 0.15  | 0.15  | 1.00 |
| Q07821   | Iron-sulfur assembly protein 1 [OS=Saccharomyces cerevisiae S288c]                                           | 8506<br>32 | ISA1;<br>YLL027<br>W        | cell organization and biogenesis;metabolic process                                                       | mitochondrion;organelle lumen                | metal ion binding;structural molecule activity                               | 0.136 | 0.136 | 1.00 |
| P10849   | mitochondrial transcription factor 2 [OS=Saccharomyces cerevisiae S288c]                                     | 8515<br>17 | MTF2;<br>YDL044<br>C        | metabolic process                                                                                        | mitochondrion;organelle lumen                | protein binding;RNA binding                                                  | 0.08  | 0.08  | 1.00 |
| P39112   | Exoribonuclease II, mitochondrial [OS=Saccharomyces cerevisiae S288c]                                        | 8553<br>31 | DSS1;<br>YMR28<br>7C        | metabolic process                                                                                        | mitochondrion;organelle lumen                | catalytic activity;RNA binding                                               | 0.087 | 0.087 | 1.00 |
| P09950   | 5-aminolevulinatase synthase, mitochondrial [OS=Saccharomyces cerevisiae S288c]                              | 8518<br>18 | HEM1;<br>YDR23<br>2W        | metabolic process                                                                                        | mitochondrion;organelle lumen                | catalytic activity                                                           | 0.086 | 0.086 | 1.00 |
| P07263-1 | Histidine--tRNA ligase, mitochondrial [OS=Saccharomyces cerevisiae S288c]                                    | 8561<br>45 | HTS1;<br>YPR033<br>C        | cell organization and biogenesis;metabolic process                                                       | cytoplasm;mitochondrion                      | catalytic activity;nucleotide binding;RNA binding                            | 0.064 | 0.064 | 1.00 |

|        |                                                                                                            |        |                        |                                                                                                          |                                              |                                                                        |        |        |      |
|--------|------------------------------------------------------------------------------------------------------------|--------|------------------------|----------------------------------------------------------------------------------------------------------|----------------------------------------------|------------------------------------------------------------------------|--------|--------|------|
| P38816 | thioredoxin reductase 2, mitochondrial [OS=Saccharomyces cerevisiae S288c]                                 | 856506 | TRR2; YHR106W          | cellular homeostasis;metabolic process;regulation of biological process;response to stimulus             | cytoplasm;mitochondrion                      | antioxidant activity;catalytic activity                                | 0.136  | 0.136  | 1.00 |
| P10174 | cytochrome c oxidase subunit 7 [OS=Saccharomyces cerevisiae S288c]                                         | 855298 | COX7; YMR256C          | metabolic process;transport                                                                              | membrane;mitochondrion                       | catalytic activity;transporter activity                                | 1.154  | 1.154  | 1.00 |
| P32463 | Acyl carrier protein, mitochondrial [OS=Saccharomyces cerevisiae S288c]                                    | 853642 | ACP1; YKL192C          | metabolic process;transport                                                                              | mitochondrion                                |                                                                        | 0.259  | 0.259  | 1.00 |
| P04039 | Cytochrome c oxidase polypeptide VIII, mitochondrial [OS=Saccharomyces cerevisiae S288c]                   | 851111 | COX8; YLR395C          | metabolic process;transport                                                                              | membrane;mitochondrion                       | catalytic activity;transporter activity                                | 0.778  | 0.778  | 1.00 |
| P34231 | Uncharacterized protein YKL187C [OS=Saccharomyces cerevisiae S288c]                                        | 853648 | FAT3; YKL187C; YKL187C | cell organization and biogenesis;transport                                                               | membrane;mitochondrion                       |                                                                        | 0.093  | 0.093  | 1.00 |
| P25578 | CDP-diacylglycerol--glycerol-3-phosphate 3-phosphatidyltransferase [OS=Saccharomyces cerevisiae S288c]     | 850352 | PGS1; YCL004W          | metabolic process                                                                                        | mitochondrion                                | catalytic activity;nucleotide binding                                  | 0.083  | 0.083  | 1.00 |
| P39103 | Cytochrome c oxidase assembly protein COX14 [OS=Saccharomyces cerevisiae S288c]                            | 854910 | COX14; YML129C         | cell organization and biogenesis;regulation of biological process                                        | membrane;mitochondrion;organelle lumen       | protein binding                                                        | 0.585  | 0.585  | 1.00 |
| P27882 | Mitochondrial FAD-linked sulfhydryl oxidase erv1 [OS=Saccharomyces cerevisiae S288c]                       | 852916 | ERV1; YGR029W          | cellular homeostasis;metabolic process;response to stimulus;transport                                    | mitochondrion                                | catalytic activity;protein binding                                     | 0.212  | 0.212  | 1.00 |
| P53320 | Mitochondrial carrier protein MTM1 [OS=Saccharomyces cerevisiae S288c]                                     | 853173 | MTM1; YGR257C          | metabolic process;transport                                                                              | membrane;mitochondrion                       | structural molecule activity                                           | 0.11   | 0.11   | 1.00 |
| Q08622 | Genetic interactor of prohibitins 3, mitochondrial [OS=Saccharomyces cerevisiae S288c]                     | 854380 | GEP3; YOR205C          | metabolic process;transport                                                                              | cytosol;membrane;mitochondrion               | catalytic activity;nucleotide binding;transporter activity             | 0.059  | 0.059  | 1.00 |
| P30624 | Long-chain-fatty-acid--CoA ligase 1 [OS=Saccharomyces cerevisiae S288c]                                    | 854495 | FAA1; YOR317W          | metabolic process;transport                                                                              | endoplasmic reticulum;membrane;mitochondrion | catalytic activity;nucleotide binding                                  | 5.874  | 6.252  | 1.06 |
| Q12031 | Mitochondrial 2-methylisocitrate lyase [OS=Saccharomyces cerevisiae S288c]                                 | 856114 | ICL2; YPR006C          | metabolic process                                                                                        | mitochondrion;organelle lumen                | catalytic activity                                                     | 3.833  | 4.135  | 1.08 |
| P47127 | Altered inheritance of mitochondria protein 24, mitochondrial [OS=Saccharomyces cerevisiae S288c]          | 853543 | AIM24; YJR080C         | cell organization and biogenesis                                                                         | mitochondrion                                |                                                                        | 2.857  | 3.175  | 1.11 |
| P27929 | 37S ribosomal protein NAM9, mitochondrial [OS=Saccharomyces cerevisiae S288c]                              | 855585 | NAM9; YNL137C          | cell organization and biogenesis;metabolic process;regulation of biological process                      | mitochondrion;ribosome                       | RNA binding;structural molecule activity                               | 1.202  | 1.352  | 1.12 |
| P50085 | Prohibitin-2 [OS=Saccharomyces cerevisiae S288c]                                                           | 853146 | PHB2; YGR231C          | cell organization and biogenesis;metabolic process;regulation of biological process                      | membrane;mitochondrion                       | protein binding                                                        | 3.806  | 4.337  | 1.14 |
| P09457 | ATP synthase subunit 5, mitochondrial [OS=Saccharomyces cerevisiae S288c]                                  | 851892 | ATP5; YDR298C          | metabolic process;transport                                                                              | membrane;mitochondrion                       | catalytic activity;transporter activity                                | 10.365 | 11.915 | 1.15 |
| P38988 | Mitochondrial GTP/GDP carrier protein 1 [OS=Saccharomyces cerevisiae S288c]                                | 851329 | GGC1; YDL198C          | cell organization and biogenesis;cellular homeostasis;metabolic process;transport                        | membrane;mitochondrion                       | structural molecule activity;transporter activity                      | 3.16   | 3.642  | 1.15 |
| P40961 | prohibitin-1 [OS=Saccharomyces cerevisiae S288c]                                                           | 853033 | PHB1; YGR132C          | cell organization and biogenesis;metabolic process;regulation of biological process                      | membrane;mitochondrion                       | protein binding                                                        | 5.158  | 5.952  | 1.15 |
| P53206 | putative cysteine synthase [OS=Saccharomyces cerevisiae S288c]                                             | 852895 | YGR012W; YGR012W       | metabolic process                                                                                        | mitochondrion                                | catalytic activity                                                     | 1.346  | 1.555  | 1.16 |
| P53292 | 37S ribosomal protein S35, mitochondrial [OS=Saccharomyces cerevisiae S288c]                               | 853075 | MRPS35; YGR165W        | cell organization and biogenesis;metabolic process                                                       | mitochondrion;ribosome                       | structural molecule activity                                           | 1.512  | 1.754  | 1.16 |
| Q12482 | Mitochondrial aspartate-glutamate transporter AGC1 [OS=Saccharomyces cerevisiae S288c]                     | 856132 | AGC1; YPR021C          | metabolic process;transport                                                                              | membrane;mitochondrion                       | structural molecule activity;transporter activity                      | 0.348  | 0.407  | 1.17 |
| P32898 | Mitochondrial presequence protease [OS=Saccharomyces cerevisiae S288c]                                     | 852041 | CYM1; YDR430C          | metabolic process                                                                                        | mitochondrion                                | catalytic activity;metal ion binding                                   | 0.812  | 0.951  | 1.17 |
| P53170 | [Pyruvate dehydrogenase (acetyl-transferring)] kinase 2, mitochondrial [OS=Saccharomyces cerevisiae S288c] | 852821 | PKP2; YGL059W          | metabolic process;regulation of biological process                                                       | mitochondrion;organelle lumen                | catalytic activity;nucleotide binding;protein binding                  | 0.778  | 0.931  | 1.20 |
| P00560 | Phosphoglycerate kinase [OS=Saccharomyces cerevisiae S288c]                                                | 850370 | PGK1; YCR012W          | metabolic process                                                                                        | cytoplasm;membrane;mitochondrion             | catalytic activity;nucleotide binding                                  | 4.843  | 5.813  | 1.20 |
| Q02981 | ABC1 family protein YPL109C, mitochondrial [OS=Saccharomyces cerevisiae S288c]                             | 855995 | YPL109C; YPL109C       |                                                                                                          | mitochondrion                                |                                                                        | 0.413  | 0.496  | 1.20 |
| P35191 | DnaJ homolog 1, mitochondrial [OS=Saccharomyces cerevisiae S288c]                                          | 850530 | MDJ1; YFL016C          | cell organization and biogenesis;metabolic process;regulation of biological process;response to stimulus | mitochondrion;organelle lumen                | enzyme regulator activity;metal ion binding;nucleotide binding;protein | 2.765  | 3.329  | 1.20 |

|        |                                                                                                             |            |                                |                                                                                                                               |                                                               |                                                                                        |            |            |      |
|--------|-------------------------------------------------------------------------------------------------------------|------------|--------------------------------|-------------------------------------------------------------------------------------------------------------------------------|---------------------------------------------------------------|----------------------------------------------------------------------------------------|------------|------------|------|
|        |                                                                                                             |            |                                |                                                                                                                               |                                                               | binding                                                                                |            |            |      |
| P33310 | ATP-dependent permease MDL1, mitochondrial [OS=Saccharomyces cerevisiae S288c]                              | 8508<br>85 | MDL1;<br>YLR188<br>W           | transport                                                                                                                     | membrane;mitochondrion                                        | catalytic activity;nucleotide binding;transporter activity                             | 0.438      | 0.528      | 1.21 |
| Q06493 | LETM1 domain-containing protein YLH47, mitochondrial [OS=Saccharomyces cerevisiae S288c]                    | 8562<br>43 | YLH47;<br>YPR125<br>W          | cell organization and biogenesis;transport                                                                                    | membrane;mitochondrion                                        |                                                                                        | 0.61       | 0.743      | 1.22 |
| P10662 | 37S ribosomal protein MRP1, mitochondrial [OS=Saccharomyces cerevisiae S288c]                               | 8519<br>48 | MRP1;<br>YDR34<br>7W           | cell organization and biogenesis;metabolic process;response to stimulus                                                       | mitochondrion;ribosome                                        | antioxidant activity;catalytic activity;metal ion binding;structural molecule activity | 1.239      | 1.512      | 1.22 |
| P11325 | Leucine--tRNA ligase, mitochondrial [OS=Saccharomyces cerevisiae S288c]                                     | 8510<br>98 | NAM2;<br>YLR382<br>C           | cell organization and biogenesis;metabolic process;regulation of biological process                                           | cytosol;mitochondrion;organelle lumen                         | catalytic activity;nucleotide binding;RNA binding                                      | 0.208      | 0.254      | 1.22 |
| P08466 | mitochondrial nuclease [OS=Saccharomyces cerevisiae S288c]                                                  | 8532<br>22 | NUC1;<br>YIL208<br>C           | cell death;metabolic process                                                                                                  | membrane;mitochondrion;nucleus                                | catalytic activity;metal ion binding                                                   | 1.336      | 1.637      | 1.23 |
| Q07651 | SUR7 family protein FMP45 [OS=Saccharomyces cerevisiae S288c]                                               | 8513<br>04 | FMP45;<br>YDL222<br>C          | cell differentiation;cell organization and biogenesis                                                                         | membrane;mitochondrion                                        |                                                                                        | 6.017      | 7.377      | 1.23 |
| P53982 | isocitrate dehydrogenase [NADP] [OS=Saccharomyces cerevisiae S288c]                                         | 8557<br>23 | IDP3;<br>YNL009<br>W           | metabolic process                                                                                                             | cytoplasm;mitochondrion                                       | catalytic activity;metal ion binding;nucleotide binding                                | 1.943      | 2.398      | 1.23 |
| Q04458 | Fatty aldehyde dehydrogenase HFD1 [OS=Saccharomyces cerevisiae S288c]                                       | 8551<br>37 | HFD1;<br>YMR11<br>OC           | metabolic process                                                                                                             | endoplasmic reticulum;endosome;membrane;mitochondrion         | catalytic activity                                                                     | 3.642      | 4.505      | 1.24 |
| Q06143 | mitochondrial dicarboxylate transporter [OS=Saccharomyces cerevisiae S288c]                                 | 8510<br>63 | DIC1;<br>YLR348<br>C           | metabolic process;transport                                                                                                   | membrane;mitochondrion                                        | structural molecule activity;transporter activity                                      | 0.931      | 1.154      | 1.24 |
| P32331 | Carrier protein YMC1, mitochondrial [OS=Saccharomyces cerevisiae S288c]                                     | 8561<br>71 | YMC1;<br>YPR058<br>W           | metabolic process;transport                                                                                                   | membrane;mitochondrion;vacuole                                | structural molecule activity;transporter activity                                      | 1.254      | 1.581      | 1.26 |
| P40185 | Protein mmf1, mitochondrial [OS=Saccharomyces cerevisiae S288c]                                             | 8547<br>60 | MMF1;<br>YIL051<br>C           | cell organization and biogenesis;metabolic process                                                                            | mitochondrion;organelle lumen                                 |                                                                                        | 6.943      | 9          | 1.30 |
| P36112 | MICOS complex subunit Mic60 [OS=Saccharomyces cerevisiae S288c]                                             | 8538<br>86 | FCJ1;<br>MIC60;<br>YKR016<br>W | cell organization and biogenesis;transport                                                                                    | membrane;mitochondrion                                        |                                                                                        | 15.37<br>9 | 19.96<br>2 | 1.30 |
| P21375 | Fumarate reductase 2 [OS=Saccharomyces cerevisiae S288c]                                                    | 8535<br>10 | OSM1;<br>YJR051<br>W           | metabolic process                                                                                                             | endoplasmic reticulum;mitochondrion                           | catalytic activity;nucleotide binding                                                  | 0.346      | 0.45       | 1.30 |
| P04710 | ADP,ATP carrier protein 1 [OS=Saccharomyces cerevisiae S288c]                                               | 8550<br>78 | AAC1;<br>YMR05<br>6C           | metabolic process;transport                                                                                                   | cytosol;membrane;mitochondrion                                | structural molecule activity;transporter activity                                      | 10.28<br>8 | 13.38<br>4 | 1.30 |
| P38825 | Protein TOM71 [OS=Saccharomyces cerevisiae S288c]                                                           | 8565<br>17 | TOM71<br>;<br>YHR11<br>7W      | transport                                                                                                                     | membrane;mitochondrion                                        | protein binding;transporter activity                                                   | 0.701      | 0.914      | 1.30 |
| Q01852 | Mitochondrial import inner membrane translocase subunit TIM44 [OS=Saccharomyces cerevisiae S288c]           | 8547<br>90 | TIM44;<br>YIL022<br>W          | transport                                                                                                                     | membrane;mitochondrion                                        | nucleotide binding;protein binding                                                     | 4.125      | 5.404      | 1.31 |
| P36525 | 54S ribosomal protein L24, mitochondrial [OS=Saccharomyces cerevisiae S288c]                                | 8552<br>31 | MRPL2<br>4;<br>YMR19<br>3W     | cell organization and biogenesis;metabolic process                                                                            | mitochondrion;ribosome                                        | RNA binding;structural molecule activity                                               | 1.154      | 1.512      | 1.31 |
| P00128 | Cytochrome b-c1 complex subunit 7 [OS=Saccharomyces cerevisiae S288c]                                       | 8521<br>42 | QCR7;<br>YDR52<br>9C           | cell organization and biogenesis;metabolic process;transport                                                                  | membrane;mitochondrion                                        | catalytic activity;transporter activity                                                | 11.91<br>5 | 15.68<br>1 | 1.32 |
| Q02776 | Mitochondrial import inner membrane translocase subunit TIM50 [OS=Saccharomyces cerevisiae S288c]           | 8560<br>42 | TIM50;<br>YPL063<br>W          | cell organization and biogenesis;metabolic process;transport                                                                  | membrane;mitochondrion                                        | catalytic activity;protein binding;transporter activity                                | 7.483      | 9.857      | 1.32 |
| P21801 | Succinate dehydrogenase [ubiquinone] iron-sulfur subunit, mitochondrial [OS=Saccharomyces cerevisiae S288c] | 8506<br>85 | SDH2;<br>YLL041<br>C           | metabolic process;transport                                                                                                   | membrane;mitochondrion                                        | catalytic activity;metal ion binding                                                   | 18.68<br>4 | 24.80<br>9 | 1.33 |
| P53220 | Mitochondrial import inner membrane translocase subunit TIM21 [OS=Saccharomyces cerevisiae S288c]           | 8529<br>21 | TIM21;<br>YGR03<br>3C          | cell organization and biogenesis;transport                                                                                    | membrane;mitochondrion                                        | protein binding                                                                        | 0.719      | 0.968      | 1.35 |
| Q01574 | acetyl-coenzyme A synthetase 1 [OS=Saccharomyces cerevisiae S288c]                                          | 8512<br>45 | ACS1;<br>YAL054<br>C           | cell organization and biogenesis;metabolic process                                                                            | cytoplasm;cytosol;endoplasmic reticulum;mitochondrion;nucleus | catalytic activity;nucleotide binding                                                  | 3.281      | 4.456      | 1.36 |
| P00445 | Superoxide dismutase [Cu-Zn] [OS=Saccharomyces cerevisiae S288c]                                            | 8535<br>68 | SOD1;<br>YJR104<br>C           | cell organization and biogenesis;cellular homeostasis;metabolic process;regulation of biological process;response to stimulus | cytoplasm;cytosol;mitochondrion;nucleus                       | antioxidant activity;catalytic activity;metal ion binding;protein binding              | 1.848      | 2.511      | 1.36 |
| P43635 | Citrate synthase 3, mitochondrial [OS=Saccharomyces cerevisiae S288c]                                       | 8561<br>07 | CIT3;<br>YPR001<br>W           | metabolic process                                                                                                             | mitochondrion                                                 | catalytic activity                                                                     | 3.642      | 4.995      | 1.37 |
| P38169 | Kynurenine 3-monooxygenase [OS=Saccharomyces cerevisiae S288c]                                              | 8521<br>79 | BNA4;<br>YBL098                | metabolic process                                                                                                             | membrane;mitochondrion                                        | catalytic activity;nucleotide                                                          | 0.269      | 0.374      | 1.39 |

|        |                                                                                                   |        |                 |                                                                   |                                                 |                                                                   |         |         |      |
|--------|---------------------------------------------------------------------------------------------------|--------|-----------------|-------------------------------------------------------------------|-------------------------------------------------|-------------------------------------------------------------------|---------|---------|------|
|        |                                                                                                   |        | W               |                                                                   |                                                 | binding                                                           |         |         |      |
| P48015 | Aminomethyltransferase, mitochondrial [OS=Saccharomyces cerevisiae S288c]                         | 851582 | GCV1; YDR019C   | metabolic process                                                 | mitochondrion                                   | catalytic activity;protein binding                                | 8.047   | 11.217  | 1.39 |
| P22136 | ATPase expression protein 2, mitochondrial [OS=Saccharomyces cerevisiae S288c]                    | 855325 | AEP2; YMR282C   | metabolic process;regulation of biological process                | mitochondrion                                   | RNA binding                                                       | 0.359   | 0.506   | 1.41 |
| P42940 | Probable electron transfer flavoprotein subunit beta [OS=Saccharomyces cerevisiae S288c]          | 853121 | CIR1; YGR207C   | metabolic process;transport                                       | mitochondrion;organelle lumen                   |                                                                   | 3.87    | 5.494   | 1.42 |
| P19516 | Cytochrome c oxidase assembly protein COX11, mitochondrial [OS=Saccharomyces cerevisiae S288c]    | 855971 | COX11; YPL132W  | cell organization and biogenesis;metabolic process                | membrane;mitochondrion;ribosome                 | metal ion binding                                                 | 0.438   | 0.624   | 1.42 |
| P32902 | 37S ribosomal protein MRP4, mitochondrial [OS=Saccharomyces cerevisiae S288c]                     | 856384 | MRP4; YHL004W   | cell organization and biogenesis;metabolic process                | mitochondrion;ribosome                          | structural molecule activity                                      | 0.957   | 1.371   | 1.43 |
| P53889 | uncharacterized mitochondrial hydrolase FMP41 [OS=Saccharomyces cerevisiae S288c]                 | 855553 | FMP41; YNL168C  | metabolic process                                                 | mitochondrion                                   | catalytic activity;metal ion binding                              | 0.501   | 0.719   | 1.44 |
| P31334 | 54S ribosomal protein L9, mitochondrial [OS=Saccharomyces cerevisiae S288c]                       | 853135 | MRPL9; YGR220C  | cell organization and biogenesis;metabolic process                | mitochondrion;ribosome                          | structural molecule activity                                      | 0.501   | 0.719   | 1.44 |
| P40215 | External NADH-ubiquinone oxidoreductase 1, mitochondrial [OS=Saccharomyces cerevisiae S288c]      | 855176 | NDE1; YMR145C   | metabolic process                                                 | mitochondrion                                   | catalytic activity;nucleotide binding                             | 5.078   | 7.297   | 1.44 |
| P30902 | ATP synthase subunit d, mitochondrial [OS=Saccharomyces cerevisiae S288c]                         | 853853 | ATP7; YKL016C   | metabolic process;transport                                       | membrane;mitochondrion                          | catalytic activity;transporter activity                           | 6.197   | 9       | 1.45 |
| P00175 | Cytochrome b2, mitochondrial [OS=Saccharomyces cerevisiae S288c]                                  | 854950 | CYB2; YML054C   | metabolic process;transport                                       | cytosol;membrane;mitochondrion;nucleus          | catalytic activity;metal ion binding;nucleotide binding           | 0.679   | 0.995   | 1.47 |
| Q12428 | Probable 2-methylcitrate dehydratase [OS=Saccharomyces cerevisiae S288c]                          | 856108 | PDH1; YPRO02W   | metabolic process                                                 | cytoplasm;membrane;mitochondrion                | catalytic activity                                                | 12.335  | 18.11   | 1.47 |
| P32335 | Protein MSS51, mitochondrial [OS=Saccharomyces cerevisiae S288c]                                  | 850900 | MSS51; YLR203C  | metabolic process;regulation of biological process                | membrane;mitochondrion                          | protein binding;translation regulator activity                    | 1.154   | 1.712   | 1.48 |
| P23641 | mitochondrial phosphate carrier protein [OS=Saccharomyces cerevisiae S288c]                       | 853540 | MIR1; YJR077C   | metabolic process;transport                                       | membrane;mitochondrion                          | protein binding;structural molecule activity;transporter activity | 20.544  | 30.623  | 1.49 |
| P25719 | Peptidyl-prolyl cis-trans isomerase C, mitochondrial [OS=Saccharomyces cerevisiae S288c]          | 854897 | CPR3; YML078W   | cell death;metabolic process                                      | mitochondrion;organelle lumen                   | catalytic activity                                                | 2.415   | 3.642   | 1.51 |
| P00447 | Superoxide dismutase [Mn], mitochondrial [OS=Saccharomyces cerevisiae S288c]                      | 856399 | SOD2; YHR008C   | metabolic process;response to stimulus                            | mitochondrion;organelle lumen                   | antioxidant activity;catalytic activity;metal ion binding         | 3.924   | 6.017   | 1.53 |
| P04037 | cytochrome c oxidase subunit 4, mitochondrial [OS=Saccharomyces cerevisiae S288c]                 | 852688 | COX4; YGL187C   | cell organization and biogenesis;metabolic process;transport      | membrane;mitochondrion                          | catalytic activity;metal ion binding;transporter activity         | 27.48   | 42.288  | 1.54 |
| Q07500 | External NADH-ubiquinone oxidoreductase 2, mitochondrial [OS=Saccharomyces cerevisiae S288c]      | 851474 | NDE2; YDL085W   | metabolic process                                                 | mitochondrion                                   | catalytic activity;nucleotide binding                             | 6.356   | 9.798   | 1.54 |
| P36531 | 54S ribosomal protein L36, mitochondrial [OS=Saccharomyces cerevisiae S288c]                      | 852419 | MRPL36; YBR122C | cell organization and biogenesis;metabolic process                | mitochondrion;ribosome                          | structural molecule activity                                      | 1.154   | 1.783   | 1.55 |
| P08417 | fumarate hydratase, mitochondrial [OS=Saccharomyces cerevisiae S288c]                             | 855866 | FUM1; YPL262W   | cell organization and biogenesis;metabolic process                | cytoplasm;cytosol;mitochondrion;organelle lumen | catalytic activity                                                | 8.237   | 12.738  | 1.55 |
| Q06678 | 54S ribosomal protein L35, mitochondrial [OS=Saccharomyces cerevisiae S288c]                      | 851921 | MRPL35; YDR322W | cell organization and biogenesis;metabolic process                | mitochondrion;ribosome                          | structural molecule activity                                      | 1.219   | 1.894   | 1.55 |
| Q12466 | tricalbin-1 [OS=Saccharomyces cerevisiae S288c]                                                   | 854253 | TCB1; YOR086C   | cell organization and biogenesis;regulation of biological process | endoplasmic reticulum;membrane;mitochondrion    | metal ion binding;protein binding                                 | 0.52    | 0.81    | 1.56 |
| P40051 | Intermediate cleaving peptidase 55 [OS=Saccharomyces cerevisiae S288c]                            | 856811 | ICP55; YER078C  | metabolic process;regulation of biological process                | membrane;mitochondrion;nucleus                  | catalytic activity;metal ion binding                              | 0.16    | 0.25    | 1.56 |
| P43616 | Cys-Gly metalloprotease dug1 [OS=Saccharomyces cerevisiae S288c]                                  | 850605 | DUG1; YFR044C   | metabolic process                                                 | cytoplasm;mitochondrion;ribosome                | catalytic activity;metal ion binding                              | 0.848   | 1.326   | 1.56 |
| P29704 | squalene synthase [OS=Saccharomyces cerevisiae S288c]                                             | 856597 | ERG9; YHR190W   | metabolic process                                                 | endoplasmic reticulum;membrane;mitochondrion    | catalytic activity                                                | 0.222   | 0.35    | 1.58 |
| Q06485 | Autophagy-related protein 33 [OS=Saccharomyces cerevisiae S288c]                                  | 851070 | ATG33; YLR356W  | cell communication;metabolic process;response to stimulus         | membrane;mitochondrion                          |                                                                   | 1.371   | 2.162   | 1.58 |
| P50088 | Stationary phase gene 1 protein [OS=Saccharomyces cerevisiae S288c]                               | 853151 | SPG1; YGR236C   |                                                                   | endoplasmic reticulum;membrane;mitochondrion    |                                                                   | 157.489 | 250.189 | 1.59 |
| P47045 | mitochondrial import inner membrane translocase subunit TIM54 [OS=Saccharomyces cerevisiae S288c] | 853392 | TIM54; YJL054W  | cell organization and biogenesis;transport                        | cytosol;membrane;mitochondrion                  | transporter activity                                              | 0.655   | 1.054   | 1.61 |

|        |                                                                                                                      |        |                |                                                                                     |                                                        |                                                                         |        |         |      |
|--------|----------------------------------------------------------------------------------------------------------------------|--------|----------------|-------------------------------------------------------------------------------------|--------------------------------------------------------|-------------------------------------------------------------------------|--------|---------|------|
|        | S288c]                                                                                                               |        |                |                                                                                     |                                                        |                                                                         |        |         |      |
| P40047 | Aldehyde dehydrogenase 5, mitochondrial [OS=Saccharomyces cerevisiae S288c]                                          | 856804 | ALD5; YER073W  | metabolic process                                                                   | mitochondrion;organelle lumen                          | catalytic activity                                                      | 1.955  | 3.146   | 1.61 |
| P54783 | D-arabinono-1,4-lactone oxidase [OS=Saccharomyces cerevisiae S288c]                                                  | 854888 | ALO1; YML086C  | metabolic process;response to stimulus                                              | membrane;mitochondrion                                 | catalytic activity;nucleotide binding                                   | 3.299  | 5.31    | 1.61 |
| P38884 | Altered inheritance of mitochondria protein 18, mitochondrial [OS=Saccharomyces cerevisiae S288c]                    | 856605 | AIM18; YHR198C |                                                                                     | mitochondrion                                          | catalytic activity                                                      | 0.311  | 0.501   | 1.61 |
| P40341 | Mitochondrial respiratory chain complexes assembly protein YTA12 [OS=Saccharomyces cerevisiae S288c]                 | 855114 | YTA12; YMR089C | cell organization and biogenesis;metabolic process;response to stimulus;transport   | cytoplasm;membrane;mitochondrion                       | catalytic activity;metal ion binding;nucleotide binding;protein binding | 1.184  | 1.913   | 1.62 |
| P41735 | 5-demethoxyubiquinone hydroxylase, mitochondrial [OS=Saccharomyces cerevisiae S288c]                                 | 854292 | CAT5; YOR125C  | metabolic process                                                                   | membrane;mitochondrion                                 | catalytic activity;metal ion binding                                    | 0.334  | 0.54    | 1.62 |
| P07246 | Alcohol dehydrogenase 3, mitochondrial [OS=Saccharomyces cerevisiae S288c]                                           | 855107 | ADH3; YMR083W  | metabolic process                                                                   | mitochondrion;organelle lumen                          | catalytic activity;metal ion binding                                    | 7.031  | 11.452  | 1.63 |
| P16622 | Ferrochelatase, mitochondrial [OS=Saccharomyces cerevisiae S288c]                                                    | 854347 | HEM15; YOR176W | metabolic process                                                                   | membrane;mitochondrion                                 | catalytic activity                                                      | 4.337  | 7.111   | 1.64 |
| P00925 | Enolase 2 [OS=Saccharomyces cerevisiae S288c]                                                                        | 856579 | ENO2; YHR174W  | metabolic process;regulation of biological process                                  | cytoplasm;cytosol;membrane;mitochondrion;vacuole       | catalytic activity;metal ion binding;protein binding                    | 1.395  | 2.29    | 1.64 |
| P32454 | Aminopeptidase 2, mitochondrial [OS=Saccharomyces cerevisiae S288c]                                                  | 853699 | APE2; YKL157W  | metabolic process                                                                   | cytoplasm;extracellular;membrane;mitochondrion;nucleus | catalytic activity;metal ion binding                                    | 1.209  | 1.988   | 1.64 |
| Q03201 | 37S ribosomal protein S10, mitochondrial [OS=Saccharomyces cerevisiae S288c]                                         | 851611 | RSM10; YDR041W | cell organization and biogenesis;metabolic process                                  | mitochondrion;ribosome                                 | structural molecule activity                                            | 0.425  | 0.701   | 1.65 |
| P40515 | Mitochondria fission 1 protein [OS=Saccharomyces cerevisiae S288c]                                                   | 854745 | FIS1; YIL065C  | cell death;cell organization and biogenesis;regulation of biological process        | membrane;mitochondrion                                 | protein binding                                                         | 0.468  | 0.778   | 1.66 |
| P39522 | Dihydroxy-acid dehydratase, mitochondrial [OS=Saccharomyces cerevisiae S288c]                                        | 853473 | ILV3; YJR016C  | metabolic process                                                                   | mitochondrion                                          | catalytic activity;metal ion binding                                    | 16.475 | 27.48   | 1.67 |
| Q08822 | Probable electron transfer flavoprotein-ubiquinone oxidoreductase, mitochondrial [OS=Saccharomyces cerevisiae S288c] | 854538 | CIR2; YOR356W  | metabolic process;transport                                                         | membrane;mitochondrion                                 | catalytic activity;metal ion binding;nucleotide binding                 | 2.162  | 3.642   | 1.68 |
| P40530 | [Pyruvate dehydrogenase (acetyl-transferring)] kinase 1, mitochondrial [OS=Saccharomyces cerevisiae S288c]           | 854769 | PKP1; YIL042C  | metabolic process                                                                   | mitochondrion;organelle lumen                          | catalytic activity;nucleotide binding;protein binding                   | 0.551  | 0.931   | 1.69 |
| Q02486 | ARS-binding factor 2, mitochondrial [OS=Saccharomyces cerevisiae S288c]                                              | 855094 | ABF2; YMR072W  | cell organization and biogenesis;metabolic process;regulation of biological process | chromosome;mitochondrion;nucleus                       | DNA binding                                                             | 69.17  | 118.378 | 1.71 |
| Q12374 | Nuclear control of ATPase protein 2 [OS=Saccharomyces cerevisiae S288c]                                              | 856278 | NCA2; YPR155C  | metabolic process                                                                   | membrane;mitochondrion                                 |                                                                         | 0.668  | 1.154   | 1.73 |
| P49095 | Glycine dehydrogenase (Decarboxylating), mitochondrial [OS=Saccharomyces cerevisiae S288c]                           | 855227 | GCV2; YMR189W  | metabolic process                                                                   | cytosol;mitochondrion                                  | catalytic activity                                                      | 1.575  | 2.728   | 1.73 |
| P07275 | Delta-1-pyrroline-5-carboxylate dehydrogenase, mitochondrial [OS=Saccharomyces cerevisiae S288c]                     | 856432 | PUT2; YHR037W  | metabolic process                                                                   | membrane;mitochondrion;organelle lumen                 | catalytic activity                                                      | 5.579  | 9.723   | 1.74 |
| P39515 | mitochondrial import inner membrane translocase subunit Tim17 [OS=Saccharomyces cerevisiae S288c]                    | 853298 | TIM17; YJL143W | cell organization and biogenesis;transport                                          | membrane;mitochondrion                                 | protein binding;transporter activity                                    | 0.778  | 1.371   | 1.76 |
| P16451 | Pyruvate dehydrogenase complex protein X component, mitochondrial [OS=Saccharomyces cerevisiae S288c]                | 853107 | PDX1; YGR193C  | metabolic process                                                                   | mitochondrion;organelle lumen                          | catalytic activity;structural molecule activity                         | 2.3    | 4.055   | 1.76 |
| Q12289 | mitochondrial carnitine carrier [OS=Saccharomyces cerevisiae S288c]                                                  | 854267 | CRC1; YOR100C  | metabolic process;transport                                                         | membrane;mitochondrion                                 | structural molecule activity;transporter activity                       | 0.931  | 1.683   | 1.81 |
| Q12480 | Probable electron transfer flavoprotein subunit alpha, mitochondrial [OS=Saccharomyces cerevisiae S288c]             | 856112 | AIM45; YPR004C | metabolic process;transport                                                         | mitochondrion;organelle lumen                          | catalytic activity;nucleotide binding                                   | 2.548  | 4.623   | 1.81 |
| P37292 | Serine hydroxymethyltransferase, mitochondrial [OS=Saccharomyces cerevisiae S288c]                                   | 852565 | SHM1; YBR263W  | metabolic process                                                                   | mitochondrion                                          | catalytic activity                                                      | 7.697  | 14.199  | 1.84 |
| Q04013 | Citrate/oxoglutarate carrier protein [OS=Saccharomyces cerevisiae S288c]                                             | 855282 | YHM2; YMR241W  | cell organization and biogenesis;metabolic process;transport                        | membrane;mitochondrion                                 | DNA binding;structural molecule activity;transporter activity           | 2.162  | 4.012   | 1.86 |
| Q03976 | 37S ribosomal protein S24, mitochondrial [OS=Saccharomyces cerevisiae S288c]                                         | 851755 | RSM24; YDR175C | cell organization and biogenesis;metabolic process                                  | mitochondrion;ribosome                                 | structural molecule activity                                            | 0.585  | 1.089   | 1.86 |

|        |                                                                                                              |            |                             |                                                                                                                           |                                                 |                                                                                     |            |            |      |
|--------|--------------------------------------------------------------------------------------------------------------|------------|-----------------------------|---------------------------------------------------------------------------------------------------------------------------|-------------------------------------------------|-------------------------------------------------------------------------------------|------------|------------|------|
| P05626 | ATP synthase subunit 4, mitochondrial [OS=Saccharomyces cerevisiae S288c]                                    | 8560<br>27 | ATP4;<br>YPL078<br>C        | cell organization and biogenesis;metabolic process;transport                                                              | membrane;mitochondrion                          | catalytic activity;transporter activity                                             | 3.084      | 5.813      | 1.88 |
| Q06089 | Uncharacterized mitochondrial outer membrane protein YPR098C [OS=Saccharomyces cerevisiae S288c]             | 8562<br>13 | YPR098<br>C;<br>YPR098<br>C |                                                                                                                           | membrane;mitochondrion                          |                                                                                     | 4.623      | 9          | 1.95 |
| P25087 | Sterol 24-C-methyltransferase [OS=Saccharomyces cerevisiae S288c]                                            | 8550<br>03 | ERG6;<br>YML00<br>8C        | metabolic process                                                                                                         | endoplasmic reticulum;membrane;mitochondrion    | catalytic activity                                                                  | 1.424      | 2.775      | 1.95 |
| P32473 | Pyruvate dehydrogenase E1 component subunit beta, mitochondrial [OS=Saccharomyces cerevisiae S288c]          | 8525<br>22 | PDB1;<br>YBR221<br>C        | metabolic process                                                                                                         | mitochondrion;organelle lumen                   | catalytic activity                                                                  | 6.848      | 13.38<br>4 | 1.95 |
| Q00711 | Succinate dehydrogenase [ubiquinone] flavoprotein subunit, mitochondrial [OS=Saccharomyces cerevisiae S288c] | 8537<br>09 | SDH1;<br>YKL148<br>C        | metabolic process;transport                                                                                               | membrane;mitochondrion                          | catalytic activity;nucleotide binding;protein binding                               | 8.454      | 16.53<br>5 | 1.96 |
| P07213 | Mitochondrial import receptor subunit TOM70 [OS=Saccharomyces cerevisiae S288c]                              | 8556<br>02 | TOM70<br>;<br>YNL121<br>C   | cell organization and biogenesis;transport                                                                                | membrane;mitochondrion                          | protein binding;transporter activity                                                | 2.665      | 5.236      | 1.96 |
| P23644 | Mitochondrial import receptor subunit TOM40 [OS=Saccharomyces cerevisiae S288c]                              | 8552<br>43 | TOM40<br>;<br>YMR20<br>3W   | transport                                                                                                                 | cytosol;membrane;mitochondrion                  | protein binding;transporter activity                                                | 0.896      | 1.783      | 1.99 |
| P07342 | Acetolactate synthase catalytic subunit, mitochondrial [OS=Saccharomyces cerevisiae S288c]                   | 8551<br>35 | ILV2;<br>YMR10<br>8W        | metabolic process                                                                                                         | mitochondrion                                   | catalytic activity;metal ion binding;nucleotide binding                             | 4.223      | 8.427      | 2.00 |
| Q02950 | 37S ribosomal protein MRP51, mitochondrial [OS=Saccharomyces cerevisiae S288c]                               | 8559<br>85 | MRP51<br>;<br>YPL118<br>W   | cell organization and biogenesis;metabolic process                                                                        | mitochondrion;ribosome                          | structural molecule activity                                                        | 0.668      | 1.346      | 2.01 |
| P38910 | 10 kDa heat shock protein, mitochondrial [OS=Saccharomyces cerevisiae S288c]                                 | 8541<br>85 | HSP10;<br>YOR02<br>0C       | cell organization and biogenesis;metabolic process;response to stimulus;transport                                         | cytoplasm;mitochondrion;organelle lumen         | metal ion binding;nucleotide binding;protein binding                                | 3.217      | 6.499      | 2.02 |
| P48526 | Isoleucine--tRNA ligase, mitochondrial [OS=Saccharomyces cerevisiae S288c]                                   | 8560<br>67 | ISM1;<br>YPL040<br>C        | cell organization and biogenesis;metabolic process;regulation of biological process                                       | cytoplasm;cytosol;mitochondrion;organelle lumen | catalytic activity;nucleotide binding                                               | 0.04       | 0.081      | 2.03 |
| P21954 | Isocitrate dehydrogenase [NADP], mitochondrial [OS=Saccharomyces cerevisiae S288c]                           | 8514<br>93 | IDP1;<br>YDL066<br>W        | metabolic process                                                                                                         | mitochondrion                                   | catalytic activity;metal ion binding;nucleotide binding;protein binding             | 33.14<br>5 | 67.12<br>9 | 2.03 |
| P32445 | Single-stranded DNA-binding protein RIM1, mitochondrial [OS=Saccharomyces cerevisiae S288c]                  | 8503<br>95 | RIM1;<br>YCR028<br>C-A      | cell organization and biogenesis;metabolic process;regulation of biological process                                       | mitochondrion                                   | DNA binding                                                                         | 1.783      | 3.642      | 2.04 |
| Q00402 | Nuclear migration protein NUM1 [OS=Saccharomyces cerevisiae S288c]                                           | 8517<br>27 | NUM1;<br>YDR15<br>0W        | cell organization and biogenesis;cellular component movement;metabolic process;regulation of biological process;transport | endoplasmic reticulum;mitochondrion             | catalytic activity;motor activity;protein binding                                   | 0.065      | 0.134      | 2.06 |
| P10507 | mitochondrial-processing peptidase subunit beta [OS=Saccharomyces cerevisiae S288c]                          | 8508<br>60 | MAS1;<br>YLR163<br>C        | metabolic process;transport                                                                                               | mitochondrion;organelle lumen                   | catalytic activity;metal ion binding;protein binding                                | 0.778      | 1.61       | 2.07 |
| P43603 | LAS seventeen-binding protein 3 [OS=Saccharomyces cerevisiae S288c]                                          | 8505<br>80 | LSB3;<br>YFR024<br>C-A      | cell organization and biogenesis;regulation of biological process                                                         | cytoplasm;mitochondrion                         | protein binding                                                                     | 0.089      | 0.186      | 2.09 |
| Q08179 | Mitochondrial distribution and morphology protein 38 [OS=Saccharomyces cerevisiae S288c]                     | 8541<br>30 | MDM3<br>8;<br>YOL027<br>C   | cell organization and biogenesis;cellular homeostasis;regulation of biological process;transport                          | membrane;mitochondrion                          |                                                                                     | 3.732      | 7.913      | 2.12 |
| P39965 | probable proline--tRNA ligase, mitochondrial [OS=Saccharomyces cerevisiae S288c]                             | 8568<br>20 | AIM10;<br>YER087<br>W       | metabolic process                                                                                                         | cytoplasm;mitochondrion                         | catalytic activity;nucleotide binding;RNA binding                                   | 0.125      | 0.266      | 2.13 |
| P21771 | 37S ribosomal protein S28, mitochondrial [OS=Saccharomyces cerevisiae S288c]                                 | 8519<br>37 | MRP52<br>8;<br>YDR33<br>7W  | cell organization and biogenesis;metabolic process                                                                        | mitochondrion;ribosome                          | RNA binding;structural molecule activity                                            | 0.624      | 1.336      | 2.14 |
| P28241 | Isocitrate dehydrogenase [NAD] subunit 2, mitochondrial [OS=Saccharomyces cerevisiae S288c]                  | 8543<br>03 | IDH2;<br>YOR13<br>6W        | metabolic process                                                                                                         | mitochondrion;organelle lumen                   | catalytic activity;metal ion binding;nucleotide binding;protein binding;RNA binding | 4.179      | 9          | 2.15 |
| P53212 | Probable transcriptional regulatory protein HAH1 [OS=Saccharomyces cerevisiae S288c]                         | 8529<br>04 | YGR02<br>1W;<br>YGR02<br>1W |                                                                                                                           | mitochondrion                                   |                                                                                     | 0.166      | 0.359      | 2.16 |
| P47039 | Probable kynurenine--oxoglutarate transaminase BNA3 [OS=Saccharomyces cerevisiae S288c]                      | 8533<br>86 | BNA3;<br>YJL060<br>W        | metabolic process;regulation of biological process                                                                        | cytoplasm;mitochondrion                         | catalytic activity                                                                  | 0.212      | 0.468      | 2.21 |
| P09440 | C-1-tetrahydrofolate synthase, mitochondrial [OS=Saccharomyces cerevisiae S288c]                             | 8523<br>78 | MIS1;<br>YBR084<br>W        | metabolic process                                                                                                         | cytosol;mitochondrion                           | catalytic activity;nucleotide binding                                               | 0.9        | 1.988      | 2.21 |



|        |                                                                                                                                                      |            |                        |                                                                                                          |                                         |                                                                                     |            |            |      |
|--------|------------------------------------------------------------------------------------------------------------------------------------------------------|------------|------------------------|----------------------------------------------------------------------------------------------------------|-----------------------------------------|-------------------------------------------------------------------------------------|------------|------------|------|
| P49334 | Mitochondrial import receptor subunit tom22 [OS=Saccharomyces cerevisiae S288c]                                                                      | 8555<br>92 | TOM22 ;<br>YNL131<br>W | cell organization and biogenesis;transport                                                               | membrane;mitochondrion                  | protein binding;transporter activity                                                | 0.292      | 0.668      | 2.29 |
| P33416 | Heat shock protein 78, mitochondrial [OS=Saccharomyces cerevisiae S288c]                                                                             | 8518<br>45 | HSP78;<br>YDR25<br>8C  | cell organization and biogenesis;metabolic process;regulation of biological process;response to stimulus | mitochondrion;organelle lumen           | catalytic activity;nucleotide binding;protein binding                               | 4.264      | 9.784      | 2.29 |
| P36775 | Lon protease homolog, mitochondrial [OS=Saccharomyces cerevisiae S288c]                                                                              | 8522<br>59 | PIM1;<br>YBL022<br>C   | cell organization and biogenesis;metabolic process;regulation of biological process;response to stimulus | cytoplasm;mitochondrion;organelle lumen | catalytic activity;DNA binding;nucleotide binding;RNA binding                       | 0.685      | 1.59       | 2.32 |
| P23301 | Eukaryotic translation initiation factor 5A-1 [OS=Saccharomyces cerevisiae S288c]                                                                    | 8566<br>77 | YEP2;<br>YEL034<br>W   | metabolic process;regulation of biological process                                                       | cytoplasm;mitochondrion;ribosome        | protein binding;RNA binding                                                         | 0.334      | 0.778      | 2.33 |
| P25349 | Flavoprotein-like protein YCP4 [OS=Saccharomyces cerevisiae S288c]                                                                                   | 8503<br>60 | YCP4;<br>YCR004<br>C   | metabolic process;regulation of biological process                                                       | cytoplasm;membrane;mitochondrion        | catalytic activity;nucleotide binding;protein binding                               | 5.813      | 13.67<br>8 | 2.35 |
| P00830 | ATP synthase subunit beta, mitochondrial [OS=Saccharomyces cerevisiae S288c]                                                                         | 8535<br>85 | ATP2;<br>YJR121<br>W   | metabolic process;transport                                                                              | cytosol;membrane;mitochondrion          | catalytic activity;nucleotide binding;protein binding;transporter activity          | 38.81<br>1 | 91.61<br>2 | 2.36 |
| P52893 | probable alanine aminotransferase, mitochondrial [OS=Saccharomyces cerevisiae S288c]                                                                 | 8507<br>78 | ALT1;<br>YLR089<br>C   | metabolic process                                                                                        | mitochondrion;organelle lumen           | catalytic activity                                                                  | 0.951      | 2.282      | 2.40 |
| Q03028 | Mitochondrial 2-oxodicarboxylate carrier 1 [OS=Saccharomyces cerevisiae S288c]                                                                       | 8559<br>69 | ODC1;<br>YPL134<br>C   | metabolic process;transport                                                                              | membrane;mitochondrion                  | structural molecule activity;transporter activity                                   | 4.275      | 10.36<br>5 | 2.42 |
| P36013 | NAD-dependent malic enzyme, mitochondrial [OS=Saccharomyces cerevisiae S288c]                                                                        | 8538<br>39 | MAE1;<br>YKL029<br>C   | metabolic process                                                                                        | mitochondrion;organelle lumen           | catalytic activity;metal ion binding;nucleotide binding                             | 1.512      | 3.732      | 2.47 |
| P37298 | Succinate dehydrogenase [ubiquinone] cytochrome b small subunit, mitochondrial [OS=Saccharomyces cerevisiae S288c]                                   | 8517<br>58 | SDH4;<br>YDR17<br>8W   | metabolic process;transport                                                                              | membrane;mitochondrion                  | catalytic activity;metal ion binding                                                | 3.642      | 9          | 2.47 |
| P07256 | Cytochrome b-c1 complex subunit 1, mitochondrial [OS=Saccharomyces cerevisiae S288c]                                                                 | 8522<br>35 | COR1;<br>YBL045<br>C   | metabolic process;transport                                                                              | membrane;mitochondrion                  | catalytic activity;metal ion binding;protein binding;transporter activity           | 9.89       | 24.55<br>1 | 2.48 |
| P38891 | Branched-chain-amino-acid aminotransferase, mitochondrial [OS=Saccharomyces cerevisiae S288c]                                                        | 8566<br>15 | BAT1;<br>YHR20<br>8W   | metabolic process;regulation of biological process;response to stimulus                                  | mitochondrion;organelle lumen           | catalytic activity                                                                  | 7.111      | 17.73<br>8 | 2.49 |
| P28834 | Isocitrate dehydrogenase [NAD] subunit 1, mitochondrial [OS=Saccharomyces cerevisiae S288c]                                                          | 8556<br>91 | IDH1;<br>YNL037<br>C   | metabolic process;transport                                                                              | cytosol;mitochondrion;organelle lumen   | catalytic activity;metal ion binding;nucleotide binding;protein binding;RNA binding | 7.859      | 19.69<br>1 | 2.51 |
| P39952 | Mitochondrial inner membrane protein OXA1 [OS=Saccharomyces cerevisiae S288c]                                                                        | 8568<br>98 | OXA1;<br>YER154<br>W   | cell organization and biogenesis;transport                                                               | membrane;mitochondrion                  | transporter activity                                                                | 1.054      | 2.652      | 2.52 |
| P00424 | Cytochrome c oxidase polypeptide 5A, mitochondrial [OS=Saccharomyces cerevisiae S288c]                                                               | 8556<br>75 | COX5A;<br>YNL052<br>W  | metabolic process;transport                                                                              | membrane;mitochondrion                  | catalytic activity;transporter activity                                             | 1.31       | 3.329      | 2.54 |
| P16387 | Pyruvate dehydrogenase E1 component subunit alpha, mitochondrial [OS=Saccharomyces cerevisiae S288c]                                                 | 8569<br>25 | PDA1;<br>YER178<br>W   | cell growth;metabolic process                                                                            | mitochondrion;organelle lumen           | catalytic activity                                                                  | 12.46      | 31.81<br>9 | 2.55 |
| Q12166 | 2-isopropylmalate synthase 2, mitochondrial [OS=Saccharomyces cerevisiae S288c]                                                                      | 8542<br>75 | LEU9;<br>YOR10<br>8W   | metabolic process                                                                                        | mitochondrion                           | catalytic activity;protein binding                                                  | 1.707      | 4.367      | 2.56 |
| P08067 | cytochrome b-c1 complex subunit Rieske, mitochondrial [OS=Saccharomyces cerevisiae S288c]                                                            | 8566<br>89 | RIP1;<br>YEL024<br>W   | metabolic process;transport                                                                              | membrane;mitochondrion                  | catalytic activity;metal ion binding;transporter activity                           | 25.10<br>2 | 67.12<br>9 | 2.67 |
| P41921 | glutathione reductase [OS=Saccharomyces cerevisiae S288c]                                                                                            | 8560<br>14 | GLR1;<br>YPL091<br>W   | cellular homeostasis;metabolic process;regulation of biological process;response to stimulus             | cytoplasm;cytosol;mitochondrion;nucleus | antioxidant activity;catalytic activity;nucleotide binding                          | 0.241      | 0.655      | 2.72 |
| P19262 | Dihydrolipoyllysine-residue succinyltransferase component of 2-oxoglutarate dehydrogenase complex, mitochondrial [OS=Saccharomyces cerevisiae S288c] | 8517<br>26 | KGD2;<br>YDR14<br>8C   | cell organization and biogenesis;metabolic process                                                       | mitochondrion                           | catalytic activity;protein binding                                                  | 5.7        | 15.49<br>6 | 2.72 |
| P02992 | elongation factor Tu, mitochondrial [OS=Saccharomyces cerevisiae S288c]                                                                              | 8543<br>59 | TUF1;<br>YOR18<br>7W   | cell organization and biogenesis;metabolic process                                                       | mitochondrion                           | catalytic activity;nucleotide binding;RNA binding                                   | 12.04<br>3 | 33.55<br>1 | 2.79 |
| P32891 | D-lactate dehydrogenase [cytochrome] 1, mitochondrial [OS=Saccharomyces cerevisiae S288c]                                                            | 8513<br>80 | DLD1;<br>YDL174<br>C   | metabolic process;transport                                                                              | membrane;mitochondrion                  | catalytic activity;nucleotide binding                                               | 11.25<br>3 | 32.83<br>9 | 2.92 |
| P38325 | Mitochondrial outer membrane protein OM14 [OS=Saccharomyces cerevisiae S288c]                                                                        | 8525<br>31 | OM14;<br>YBR230<br>C   | transport                                                                                                | membrane;mitochondrion                  |                                                                                     | 6.197      | 18.30<br>7 | 2.95 |

|        |                                                                                                                                              |         |                        |                                                                                                             |                                                  |                                                                           |        |        |      |
|--------|----------------------------------------------------------------------------------------------------------------------------------------------|---------|------------------------|-------------------------------------------------------------------------------------------------------------|--------------------------------------------------|---------------------------------------------------------------------------|--------|--------|------|
| Q12230 | Sphingolipid long chain base-responsive protein LSP1 [OS=Saccharomyces cerevisiae S288c]                                                     | 856103  | LSP1; YPL004C          | regulation of biological process;response to stimulus;transport                                             | cytoplasm;membrane;mitochondrion                 |                                                                           | 24.119 | 72.564 | 3.01 |
| P39726 | Glycine cleavage system H protein, mitochondrial [OS=Saccharomyces cerevisiae S288c]                                                         | 851254  | GCV3; YAL044C          | metabolic process                                                                                           | mitochondrion                                    | catalytic activity                                                        | 6.743  | 20.544 | 3.05 |
| P38077 | ATP synthase subunit gamma, mitochondrial [OS=Saccharomyces cerevisiae S288c]                                                                | 852327  | ATP3; YBR039W          | metabolic process;transport                                                                                 | membrane;mitochondrion                           | catalytic activity;transporter activity                                   | 9      | 27.48  | 3.05 |
| P48237 | Mitochondrial group I intron splicing factor CCM1 [OS=Saccharomyces cerevisiae S288c]                                                        | 853053  | CCM1; YGR150C          | cell organization and biogenesis;metabolic process                                                          | mitochondrion                                    | RNA binding                                                               | 0.044  | 0.136  | 3.09 |
| P32191 | Glycerol-3-phosphate dehydrogenase, mitochondrial [OS=Saccharomyces cerevisiae S288c]                                                        | 854651  | GUT2; YIL155C          | metabolic process                                                                                           | membrane;mitochondrion                           | catalytic activity                                                        | 6.097  | 18.855 | 3.09 |
| P40495 | Homoisocitrate dehydrogenase, mitochondrial [OS=Saccharomyces cerevisiae S288c]                                                              | 854714  | LYS12; YIL094C         | metabolic process                                                                                           | mitochondrion                                    | catalytic activity;metal ion binding;nucleotide binding                   | 3.217  | 10.007 | 3.11 |
| P49367 | Homoaconitase, mitochondrial [OS=Saccharomyces cerevisiae S288c]                                                                             | 851820  | LYS4; YDR234W          | metabolic process                                                                                           | mitochondrion                                    | catalytic activity;metal ion binding;protein binding                      | 0.638  | 1.994  | 3.13 |
| Q2V2P9 | Uncharacterized protein YDR119W-A [OS=Saccharomyces cerevisiae S288c]                                                                        | 3799970 | COX26; YDR119W-A       |                                                                                                             | membrane;mitochondrion                           |                                                                           | 1.154  | 3.642  | 3.16 |
| P81451 | ATP synthase subunit K, mitochondrial [OS=Saccharomyces cerevisiae S288c]                                                                    | 854077  | ATP19; YOL077W-A       | cell organization and biogenesis;metabolic process;transport                                                | membrane;mitochondrion                           | catalytic activity;transporter activity                                   | 1.154  | 3.642  | 3.16 |
| P38756 | tRNA threonylcarbamoyladenine dehydratase 1 [OS=Saccharomyces cerevisiae S288c]                                                              | 856392  | TCD1; YHR003C; YHR003C | metabolic process                                                                                           | cytosol;membrane;mitochondrion                   | catalytic activity;nucleotide binding                                     | 0.093  | 0.304  | 3.27 |
| P34227 | Mitochondrial peroxiredoxin PRX1 [OS=Saccharomyces cerevisiae S288c]                                                                         | 852215  | PRX1; YBL064C          | cellular homeostasis;metabolic process;regulation of biological process;response to stimulus                | mitochondrion                                    | antioxidant activity;catalytic activity                                   | 5.158  | 17.33  | 3.36 |
| Q12165 | ATP synthase subunit delta, mitochondrial [OS=Saccharomyces cerevisiae S288c]                                                                | 851560  | ATP16; YDL004W         | metabolic process;transport                                                                                 | membrane;mitochondrion                           | catalytic activity;transporter activity                                   | 1.371  | 4.623  | 3.37 |
| P04803 | Tryptophan--tRNA ligase, mitochondrial [OS=Saccharomyces cerevisiae S288c]                                                                   | 851861  | MSW1; YDR268W          | metabolic process                                                                                           | cytoplasm;mitochondrion;organelle lumen          | catalytic activity;nucleotide binding                                     | 0.136  | 0.468  | 3.44 |
| P53163 | 54S ribosomal protein L12, mitochondrial [OS=Saccharomyces cerevisiae S288c]                                                                 | 852811  | MNP1; YGL068W          | cell organization and biogenesis;metabolic process                                                          | mitochondrion;ribosome                           | RNA binding;structural molecule activity                                  | 0.52   | 1.848  | 3.55 |
| P36060 | NADH-cytochrome b5 reductase 2 [OS=Saccharomyces cerevisiae S288c]                                                                           | 853707  | MCR1; YKL150W          | metabolic process;response to stimulus                                                                      | membrane;mitochondrion                           | catalytic activity;protein binding                                        | 10.288 | 36.927 | 3.59 |
| P12695 | Dihydrolipoyllysine-residue acetyltransferase component of pyruvate dehydrogenase complex, mitochondrial [OS=Saccharomyces cerevisiae S288c] | 855653  | LAT1; YNL071W          | metabolic process                                                                                           | mitochondrion;organelle lumen                    | catalytic activity                                                        | 5.898  | 21.638 | 3.67 |
| P32340 | Rotenone-insensitive NADH-ubiquinone oxidoreductase, mitochondrial [OS=Saccharomyces cerevisiae S288c]                                       | 854919  | NDI1; YML120C          | metabolic process;regulation of biological process                                                          | membrane;mitochondrion;organelle lumen           | catalytic activity;nucleotide binding                                     | 16.433 | 61.102 | 3.72 |
| P23180 | Probable oxidoreductase AIM17 [OS=Saccharomyces cerevisiae S288c]                                                                            | 856365  | AIM17; YHL021C         | cell organization and biogenesis;metabolic process                                                          | mitochondrion                                    | catalytic activity;metal ion binding                                      | 2.981  | 11.589 | 3.89 |
| P07257 | Cytochrome b-c1 complex subunit 2, mitochondrial [OS=Saccharomyces cerevisiae S288c]                                                         | 856321  | QCR2; YPR191W          | metabolic process;transport                                                                                 | membrane;mitochondrion                           | catalytic activity;metal ion binding;protein binding;transporter activity | 21.19  | 82.768 | 3.91 |
| P04840 | Mitochondrial outer membrane protein porin 1 [OS=Saccharomyces cerevisiae S288c]                                                             | 855669  | POR1; YNL055C          | cell death;cell organization and biogenesis;cellular homeostasis;regulation of biological process;transport | cytoplasm;membrane;mitochondrion                 | transporter activity                                                      | 15.238 | 60.585 | 3.98 |
| P14540 | fructose-bisphosphate aldolase [OS=Saccharomyces cerevisiae S288c]                                                                           | 853805  | FBA1; YKL060C          | metabolic process                                                                                           | cytoplasm;cytosol;membrane;mitochondrion         | catalytic activity;metal ion binding                                      | 0.896  | 3.642  | 4.06 |
| Q08245 | protein ZEO1 [OS=Saccharomyces cerevisiae S288c]                                                                                             | 854040  | ZEO1; YOL109W          | cell organization and biogenesis                                                                            | membrane;mitochondrion                           | protein binding                                                           | 2.162  | 9      | 4.16 |
| P00360 | glyceraldehyde-3-phosphate dehydrogenase 1 [OS=Saccharomyces cerevisiae S288c]                                                               | 853395  | TDH1; YJL052W          | metabolic process                                                                                           | cytoplasm;cytosol;membrane;mitochondrion         | catalytic activity;nucleotide binding                                     | 1.721  | 7.185  | 4.17 |
| P19414 | Aconitate hydratase, mitochondrial [OS=Saccharomyces cerevisiae S288c]                                                                       | 851013  | ACO1; YLR304C          | cell organization and biogenesis;metabolic process;transport                                                | cytoplasm;cytosol;mitochondrion;organelle lumen  | catalytic activity;DNA binding;metal ion binding                          | 24.885 | 109.53 | 4.40 |
| P00890 | citrate synthase, mitochondrial [OS=Saccharomyces cerevisiae S288c]                                                                          | 855732  | CIT1; YNR001C          | metabolic process;transport                                                                                 | cytosol;mitochondrion;organelle lumen            | catalytic activity                                                        | 8.211  | 36.276 | 4.42 |
| P00358 | glyceraldehyde-3-phosphate dehydrogenase 2 [OS=Saccharomyces cerevisiae S288c]                                                               | 853465  | TDH2; YJR009C          | cell death;metabolic process                                                                                | cytoplasm;cytosol;membrane;mitochondrion;nucleus | catalytic activity;nucleotide binding;protein binding                     | 3.489  | 15.496 | 4.44 |

|          |                                                                                                   |            |                       |                                                                                                                                       |                                                          |                                                                                 |             |              |           |
|----------|---------------------------------------------------------------------------------------------------|------------|-----------------------|---------------------------------------------------------------------------------------------------------------------------------------|----------------------------------------------------------|---------------------------------------------------------------------------------|-------------|--------------|-----------|
| P00942   | Triosephosphate isomerase [OS=Saccharomyces cerevisiae S288c]                                     | 8516<br>20 | TP11;<br>YDR05<br>0C  | metabolic process                                                                                                                     | cytoplasm;cytosol;membrane;mitochondrion                 | catalytic activity                                                              | 0.425       | 1.894        | 4.46      |
| P07251   | ATP synthase subunit alpha, mitochondrial [OS=Saccharomyces cerevisiae S288c]                     | 8521<br>77 | ATP1;<br>YBL099<br>W  | metabolic process;transport                                                                                                           | cytosol;membrane;mitochondrion                           | catalytic activity;nucleotide binding;transporter activity                      | 26.82<br>6  | 120.1<br>53  | 4.48      |
| P25039   | Elongation factor G, mitochondrial [OS=Saccharomyces cerevisiae S288c]                            | 8507<br>58 | MEF1;<br>YLR069<br>C  | cell organization and biogenesis;metabolic process                                                                                    | cytosol;mitochondrion                                    | catalytic activity;nucleotide binding;RNA binding                               | 0.151       | 0.677        | 4.48      |
| P39518   | Long-chain-fatty-acid-CoA ligase 2 [OS=Saccharomyces cerevisiae S288c]                            | 8567<br>34 | FAA2;<br>YER015<br>W  | metabolic process;transport                                                                                                           | cytoplasm;mitochondrion                                  | catalytic activity;nucleotide binding                                           | 0.535       | 2.427        | 4.54      |
| P06208-1 | 2-isopropylmalate synthase [OS=Saccharomyces cerevisiae S288c]                                    | 8556<br>19 | LEU4;<br>YNL104<br>C  | metabolic process                                                                                                                     | cytoplasm;mitochondrion                                  | catalytic activity;protein binding                                              | 4.223       | 19.30<br>9   | 4.57      |
| P53252   | sphingolipid long chain base-responsive protein PIL1 [OS=Saccharomyces cerevisiae S288c]          | 8529<br>77 | PIL1;<br>YGR08<br>6C  | cell organization and biogenesis;regulation of biological process;response to stimulus;transport                                      | cytoplasm;membrane;mitochondrion                         | protein binding                                                                 | 10.45       | 49.80<br>2   | 4.77      |
| P06168   | ketol-acid reductoisomerase, mitochondrial [OS=Saccharomyces cerevisiae S288c]                    | 8510<br>69 | ILV5;<br>YLR355<br>C  | cell organization and biogenesis;metabolic process                                                                                    | mitochondrion                                            | catalytic activity;DNA binding;metal ion binding                                | 9           | 42.94        | 4.77      |
| P32939   | GTP-binding protein ypt7 [OS=Saccharomyces cerevisiae S288c]                                      | 8550<br>12 | YPT7;<br>YML00<br>1W  | cell communication;cell organization and biogenesis;metabolic process;regulation of biological process;response to stimulus;transport | cytosol;endosome;membrane;mitochondrion;vacuole          | catalytic activity;nucleotide binding;protein binding                           | 0.166       | 0.848        | 5.11      |
| P09624   | Dihydropyridyl dehydrogenase, mitochondrial [OS=Saccharomyces cerevisiae S288c]                   | 8505<br>27 | LPD1;<br>YFL018<br>C  | cellular homeostasis;metabolic process;regulation of biological process                                                               | mitochondrion;organelle lumen                            | catalytic activity;nucleotide binding                                           | 21.53<br>9  | 113.5<br>05  | 5.27      |
| P53312   | Succinyl-CoA ligase [ADP-forming] subunit beta, mitochondrial [OS=Saccharomyces cerevisiae S288c] | 8531<br>59 | LSC2;<br>YGR24<br>4C  | metabolic process                                                                                                                     | mitochondrion                                            | catalytic activity;nucleotide binding                                           | 7.003       | 37.07<br>5   | 5.29      |
| P33303   | Succinate/fumarate mitochondrial transporter [OS=Saccharomyces cerevisiae S288c]                  | 8535<br>58 | SFC1;<br>YJR095<br>W  | metabolic process;transport                                                                                                           | membrane;mitochondrion                                   | structural molecule activity;transporter activity                               | 6.743       | 39.84<br>2   | 5.91      |
| P17505   | Malate dehydrogenase, mitochondrial [OS=Saccharomyces cerevisiae S288c]                           | 8537<br>77 | MDH1;<br>YKL085<br>W  | metabolic process                                                                                                                     | mitochondrion;organelle lumen                            | catalytic activity;protein binding;RNA binding                                  | 28.93<br>6  | 172.0<br>2   | 5.94      |
| P12709   | glucose-6-phosphate isomerase [OS=Saccharomyces cerevisiae S288c]                                 | 8524<br>95 | PGI1;<br>YBR196<br>C  | metabolic process                                                                                                                     | cytoplasm;membrane;mitochondrion                         | catalytic activity                                                              | 0.166       | 0.995        | 5.99      |
| P20967   | 2-oxoglutarate dehydrogenase, mitochondrial [OS=Saccharomyces cerevisiae S288c]                   | 8546<br>81 | KGD1;<br>YIL125<br>W  | metabolic process                                                                                                                     | cytosol;mitochondrion;organelle lumen                    | catalytic activity                                                              | 8.168       | 55.84<br>8   | 6.84      |
| P16547   | Mitochondrial outer membrane protein OM45 [OS=Saccharomyces cerevisiae S288c]                     | 8546<br>70 | OM45;<br>YIL136<br>W  |                                                                                                                                       | membrane;mitochondrion                                   |                                                                                 | 300.9<br>95 | 2088.<br>296 | 6.94      |
| P19882   | heat shock protein 60, mitochondrial [OS=Saccharomyces cerevisiae S288c]                          | 8509<br>63 | HSP60;<br>YLR259<br>C | cell organization and biogenesis;metabolic process;regulation of biological process;transport                                         | cytoplasm;cytosol;membrane;mitochondrion;organelle lumen | catalytic activity;DNA binding;nucleotide binding;protein binding               | 13.38<br>4  | 93.12        | 6.96      |
| P46367   | Potassium-activated aldehyde dehydrogenase, mitochondrial [OS=Saccharomyces cerevisiae S288c]     | 8545<br>56 | ALD4;<br>YOR37<br>4W  | metabolic process                                                                                                                     | mitochondrion;organelle lumen                            | catalytic activity                                                              | 24.11<br>9  | 219.2<br>2   | 9.09      |
| POCS90   | Heat shock protein SSC1, mitochondrial [OS=Saccharomyces cerevisiae S288c]                        | 8535<br>03 | SSC1;<br>YJR045<br>C  | cell organization and biogenesis;metabolic process;regulation of biological process;transport                                         | membrane;mitochondrion;nucleus;organelle lumen           | catalytic activity;enzyme regulator activity;nucleotide binding;protein binding | 26.82<br>6  | 243.8<br>44  | 9.09      |
| P32316   | acetyl-CoA hydrolase [OS=Saccharomyces cerevisiae S288c]                                          | 8522<br>66 | ACH1;<br>YBL015<br>W  | metabolic process                                                                                                                     | cytoplasm;cytosol;mitochondrion                          | catalytic activity                                                              | 10.49<br>8  | 99           | 9.43      |
| P18239   | ADP,ATP carrier protein 2 [OS=Saccharomyces cerevisiae S288c]                                     | 8522<br>50 | PET9;<br>YBL030<br>C  | cell death;metabolic process;transport                                                                                                | membrane;mitochondrion                                   | structural molecule activity;transporter activity                               | 47.06<br>4  | 591.5<br>53  | 12.5<br>7 |

**Supplemental Table S7. The relative concentrations of proteins in mitochondria purified from *ups1Δ* cells cultured with or without LCA.** Mitochondria were purified from *ups1Δ* cells recovered on day 2 of cell culturing with or without LCA. Mass spectrometry-based identification and quantitation of proteins recovered in purified mitochondria were performed as described in Materials and methods. The exponentially modified protein abundance index (emPAI) provided by the "Proteome Discoverer" software was used to calculate the relative abundance of mitochondrial proteins between specified datasets. Data on the relative concentrations of mitochondrial proteins are presented as means of 2 independent experiments.

| Accession | Description                                                                                           | Entrez Gene ID | Gene ID          | Biological Process                                                                                                                         | Cellular Component                                  | Molecular Function                                                           | emPAI <i>ups1</i> | emPAI <i>ups1</i> + LCA | Ratio <i>ups1</i> + LCA/ <i>ups1</i> |
|-----------|-------------------------------------------------------------------------------------------------------|----------------|------------------|--------------------------------------------------------------------------------------------------------------------------------------------|-----------------------------------------------------|------------------------------------------------------------------------------|-------------------|-------------------------|--------------------------------------|
| P00175    | Cytochrome b2, mitochondrial [                                                                        | 854950         | CYB2             | metabolic process; transport                                                                                                               | cytosol; membrane; mitochondrion; nucleus           | catalytic activity; metal ion binding; nucleotide binding                    | 1.371             | 0.059                   | 0.04                                 |
| P16451    | Pyruvate dehydrogenase complex protein X component, mitochondrial [OS=Saccharomyces cerevisiae S288c] | 853107         | PDX1; YGR193C    | metabolic process                                                                                                                          | mitochondrion; organelle lumen                      | catalytic activity; structural molecule activity                             | 1.555             | 0.089                   | 0.06                                 |
| P43635    | Citrate synthase 3, mitochondrial [OS=Saccharomyces cerevisiae S288c]                                 | 856107         | CIT3; YPR001W    | metabolic process                                                                                                                          | mitochondrion                                       | catalytic activity                                                           | 2.914             | 0.186                   | 0.06                                 |
| P40513    | Mitochondrial acidic protein MAM33 [OS=Saccharomyces cerevisiae S288c]                                | 854740         | MAM33; YIL070C   | metabolic process; regulation of biological process                                                                                        | mitochondrion; organelle lumen                      | translation regulator activity                                               | 2.831             | 0.212                   | 0.07                                 |
| P53140    | Protein RMD9, mitochondrial [OS=Saccharomyces cerevisiae S288c]                                       | 852771         | RMD9; YGL107C    | cell differentiation; metabolic process; regulation of biological process                                                                  | membrane; mitochondrion                             | RNA binding                                                                  | 0.668             | 0.053                   | 0.08                                 |
| P81449    | ATP synthase subunit e, mitochondrial [OS=Saccharomyces cerevisiae S288c]                             | 851922         | TIM11; YDR322C-A | cell organization and biogenesis; metabolic process; transport                                                                             | membrane; mitochondrion                             | catalytic activity; structural molecule activity; transporter activity       | 9                 | 0.778                   | 0.09                                 |
| P00360    | glyceraldehyde-3-phosphate dehydrogenase 1 [OS=Saccharomyces cerevisiae S288c]                        | 853395         | TDH1; YIL052W    | metabolic process                                                                                                                          | cytoplasm; cytosol; membrane; mitochondrion         | catalytic activity; nucleotide binding                                       | 3.062             | 0.35                    | 0.11                                 |
| P16547    | Mitochondrial outer membrane protein OM45 [OS=Saccharomyces cerevisiae S288c]                         | 854670         | OM45; YIL136W    |                                                                                                                                            | membrane; mitochondrion                             |                                                                              | 830.764           | 99                      | 0.12                                 |
| P32891    | D-lactate dehydrogenase [cytochrome] 1, mitochondrial [OS=Saccharomyces cerevisiae S288c]             | 851380         | DLD1; YDL174C    | metabolic process; transport                                                                                                               | membrane; mitochondrion                             | catalytic activity; nucleotide binding                                       | 11.253            | 1.412                   | 0.13                                 |
| P43567    | alanine-glyoxylate aminotransferase 1 [OS=Saccharomyces cerevisiae S288c]                             | 850514         | AGX1; YFL030W    | metabolic process                                                                                                                          | cytosol; mitochondrion                              | catalytic activity                                                           | 1.61              | 0.212                   | 0.13                                 |
| P00431    | cytochrome c peroxidase, mitochondrial [OS=Saccharomyces cerevisiae S288c]                            | 853940         | CCP1; YKR066C    | metabolic process; response to stimulus                                                                                                    | mitochondrion; organelle lumen                      | antioxidant activity; catalytic activity; metal ion binding; protein binding | 0.701             | 0.093                   | 0.13                                 |
| P32787    | Mitochondrial genome maintenance protein MGM101 [OS=Saccharomyces cerevisiae S288c]                   | 853609         | MGM101; YJR144W  | cell organization and biogenesis; metabolic process; response to stimulus                                                                  | chromosome; mitochondrion                           | DNA binding                                                                  | 3.281             | 0.438                   | 0.13                                 |
| Q02981    | ABC1 family protein YPL109C, mitochondrial [OS=Saccharomyces cerevisiae S288c]                        | 855995         | YPL109C; YPL109C |                                                                                                                                            | mitochondrion                                       |                                                                              | 0.413             | 0.059                   | 0.14                                 |
| P32939    | GTP-binding protein ypt7 [OS=Saccharomyces cerevisiae S288c]                                          | 855012         | YPT7; YML001W    | cell communication; cell organization and biogenesis; metabolic process; regulation of biological process; response to stimulus; transport | cytosol; endosome; membrane; mitochondrion; vacuole | catalytic activity; nucleotide binding; protein binding                      | 1.154             | 0.166                   | 0.14                                 |
| P00927    | Threonine dehydratase, mitochondrial [OS=Saccharomyces cerevisiae S288c]                              | 856819         | ILV1; YER086W    | metabolic process                                                                                                                          | cytoplasm; mitochondrion                            | catalytic activity                                                           | 1.285             | 0.194                   | 0.15                                 |
| Q02486    | ARS-binding factor 2, mitochondrial [OS=Saccharomyces cerevisiae S288c]                               | 855094         | ABF2; YMR072W    | cell organization and biogenesis; metabolic process; regulation of biological process                                                      | chromosome; mitochondrion; nucleus                  | DNA binding                                                                  | 48.239            | 7.377                   | 0.15                                 |
| P36521    | 54S ribosomal protein L11, mitochondrial [OS=Saccharomyces cerevisiae S288c]                          | 851325         | MRPL11; YDL202W  | cell organization and biogenesis; metabolic process                                                                                        | mitochondrion; ribosome                             | structural molecule activity                                                 | 0.833             | 0.129                   | 0.15                                 |

|        |                                                                                                              |        |                      |                                                                                                                                                            |                                        |                                                                                     |        |        |      |
|--------|--------------------------------------------------------------------------------------------------------------|--------|----------------------|------------------------------------------------------------------------------------------------------------------------------------------------------------|----------------------------------------|-------------------------------------------------------------------------------------|--------|--------|------|
| P38891 | Branched-chain-amino-acid aminotransferase, mitochondrial [OS=Saccharomyces cerevisiae S288c]                | 856615 | BAT1; YHR208W        | metabolic process;regulation of biological process;response to stimulus                                                                                    | mitochondrion;organelle lumen          | catalytic activity                                                                  | 10.103 | 1.565  | 0.15 |
| P49095 | Glycine dehydrogenase (Decarboxylating), mitochondrial [OS=Saccharomyces cerevisiae S288c]                   | 855227 | GCV2; YMR189W        | metabolic process                                                                                                                                          | cytosol;mitochondrion                  | catalytic activity                                                                  | 1.471  | 0.228  | 0.15 |
| P15424 | ATP-dependent RNA helicase MSS116, mitochondrial [OS=Saccharomyces cerevisiae S288c]                         | 851775 | MSS116; YDR194C      | metabolic process;regulation of biological process                                                                                                         | mitochondrion;organelle lumen          | catalytic activity;nucleotide binding;RNA binding                                   | 0.668  | 0.108  | 0.16 |
| Q00711 | Succinate dehydrogenase [ubiquinone] flavoprotein subunit, mitochondrial [OS=Saccharomyces cerevisiae S288c] | 853709 | SDH1; YKL148C        | metabolic process;transport                                                                                                                                | membrane;mitochondrion                 | catalytic activity;nucleotide binding;protein binding                               | 12.242 | 2.075  | 0.17 |
| P53969 | Sorting assembly machinery 50 kDa subunit [OS=Saccharomyces cerevisiae S288c]                                | 855705 | SAM50; YNL026W       | cell organization and biogenesis;transport                                                                                                                 | membrane;mitochondrion                 | protein binding;transporter activity                                                | 0.487  | 0.083  | 0.17 |
| P39006 | Phosphatidylserine decarboxylase proenzyme 1, mitochondrial [OS=Saccharomyces cerevisiae S288c]              | 855552 | PSD1; YNL169C        | metabolic process;regulation of biological process                                                                                                         | membrane;mitochondrion                 | catalytic activity                                                                  | 0.487  | 0.083  | 0.17 |
| P04807 | Hexokinase-2 [OS=Saccharomyces cerevisiae S288c]                                                             | 852639 | HXK2; YGL253W        | cell communication;cell organization and biogenesis;cellular homeostasis;metabolic process;regulation of biological process;response to stimulus;transport | cytosol;mitochondrion;nucleus          | catalytic activity;nucleotide binding                                               | 0.468  | 0.08   | 0.17 |
| P32897 | Mitochondrial import inner membrane translocase subunit tim23 [OS=Saccharomyces cerevisiae S288c]            | 855751 | TIM23; YNR017W       | transport                                                                                                                                                  | membrane;mitochondrion                 | protein binding;transporter activity                                                | 1.512  | 0.259  | 0.17 |
| P39522 | Dihydroxy-acid dehydratase, mitochondrial [OS=Saccharomyces cerevisiae S288c]                                | 853473 | ILV3; YJR016C        | metabolic process                                                                                                                                          | mitochondrion                          | catalytic activity;metal ion binding                                                | 14.199 | 2.511  | 0.18 |
| P32340 | Rotenone-insensitive NADH-ubiquinone oxidoreductase, mitochondrial [OS=Saccharomyces cerevisiae S288c]       | 854919 | NDI1; YML120C        | metabolic process;regulation of biological process                                                                                                         | membrane;mitochondrion;organelle lumen | catalytic activity;nucleotide binding                                               | 29.392 | 5.21   | 0.18 |
| P53311 | Mitochondrial pyruvate carrier 3 [OS=Saccharomyces cerevisiae S288c]                                         | 853158 | FMP43; MPC3; YGR243W | transport                                                                                                                                                  | membrane;mitochondrion                 | transporter activity                                                                | 1.154  | 0.212  | 0.18 |
| P20967 | 2-oxoglutarate dehydrogenase, mitochondrial [OS=Saccharomyces cerevisiae S288c]                              | 854681 | KGD1; YIL125W        | metabolic process                                                                                                                                          | cytosol;mitochondrion;organelle lumen  | catalytic activity                                                                  | 22.843 | 4.212  | 0.18 |
| P04037 | cytochrome c oxidase subunit 4, mitochondrial [OS=Saccharomyces cerevisiae S288c]                            | 852688 | COX4; YGL187C        | cell organization and biogenesis;metabolic process;transport                                                                                               | membrane;mitochondrion                 | catalytic activity;metal ion binding;transporter activity                           | 17.738 | 3.329  | 0.19 |
| P36013 | NAD-dependent malic enzyme, mitochondrial [OS=Saccharomyces cerevisiae S288c]                                | 853839 | MAE1; YKL029C        | metabolic process                                                                                                                                          | mitochondrion;organelle lumen          | catalytic activity;metal ion binding;nucleotide binding                             | 2.162  | 0.413  | 0.19 |
| P36060 | NADH-cytochrome b5 reductase 2 [OS=Saccharomyces cerevisiae S288c]                                           | 853707 | MCR1; YKL150W        | metabolic process;response to stimulus                                                                                                                     | membrane;mitochondrion                 | catalytic activity;protein binding                                                  | 19.691 | 3.833  | 0.19 |
| P08525 | Cytochrome b-c1 complex subunit 8 [OS=Saccharomyces cerevisiae S288c]                                        | 853273 | QCR8; YJL166W        | metabolic process;transport                                                                                                                                | membrane;mitochondrion                 | catalytic activity;transporter activity                                             | 2.981  | 0.585  | 0.20 |
| P52893 | probable alanine aminotransferase, mitochondrial [OS=Saccharomyces cerevisiae S288c]                         | 850778 | ALT1; YLR089C        | metabolic process                                                                                                                                          | mitochondrion;organelle lumen          | catalytic activity                                                                  | 1.264  | 0.25   | 0.20 |
| P21954 | Isocitrate dehydrogenase [NADP], mitochondrial [OS=Saccharomyces cerevisiae S288c]                           | 851493 | IDP1; YDL066W        | metabolic process                                                                                                                                          | mitochondrion                          | catalytic activity;metal ion binding;nucleotide binding;protein binding             | 45.416 | 9      | 0.20 |
| P28834 | Isocitrate dehydrogenase [NAD] subunit 1, mitochondrial [OS=Saccharomyces cerevisiae S288c]                  | 855691 | IDH1; YNL037C        | metabolic process;transport                                                                                                                                | cytosol;mitochondrion;organelle lumen  | catalytic activity;metal ion binding;nucleotide binding;protein binding;RNA binding | 11.743 | 2.36   | 0.20 |
| P49367 | Homoaconitase, mitochondrial [OS=Saccharomyces cerevisiae S288c]                                             | 851820 | LYS4; YDR234W        | metabolic process                                                                                                                                          | mitochondrion                          | catalytic activity;metal ion binding;protein binding                                | 1.154  | 0.245  | 0.21 |
| P00427 | Cytochrome c oxidase subunit 6, mitochondrial [OS=Saccharomyces cerevisiae S288c]                            | 856448 | COX6; YHR051W        | metabolic process;transport                                                                                                                                | membrane;mitochondrion                 | catalytic activity;metal ion binding;transporter activity                           | 3.642  | 0.778  | 0.21 |
| P53312 | Succinyl-CoA ligase [ADP-forming] subunit beta, mitochondrial [OS=Saccharomyces cerevisiae S288c]            | 853159 | LSC2; YGR244C        | metabolic process                                                                                                                                          | mitochondrion                          | catalytic activity;nucleotide binding                                               | 10.602 | 2.282  | 0.22 |
| P07251 | ATP synthase subunit alpha, mitochondrial [OS=Saccharomyces cerevisiae S288c]                                | 852177 | ATP1; YBL099W        | metabolic process;transport                                                                                                                                | cytosol;membrane;mitochondrion         | catalytic activity;nucleotide binding;transporter activity                          | 58.948 | 12.769 | 0.22 |

|          |                                                                                                                                               |        |                        |                                                                                                                               |                                                |                                                                                 |        |        |      |
|----------|-----------------------------------------------------------------------------------------------------------------------------------------------|--------|------------------------|-------------------------------------------------------------------------------------------------------------------------------|------------------------------------------------|---------------------------------------------------------------------------------|--------|--------|------|
|          |                                                                                                                                               |        |                        |                                                                                                                               |                                                | r activity                                                                      |        |        |      |
| P00128   | Cytochrome b-c1 complex subunit 7 [OS=Saccharomyces cerevisiae S288c]                                                                         | 852142 | QCR7; YDR529C          | cell organization and biogenesis;metabolic process;transport                                                                  | membrane;mitochondrion                         | catalytic activity;transporter activity                                         | 11.915 | 2.594  | 0.22 |
| POCS90   | Heat shock protein SSC1, mitochondrial [OS=Saccharomyces cerevisiae S288c]                                                                    | 853503 | SSC1; YJR045C          | cell organization and biogenesis;metabolic process;regulation of biological process;transport                                 | membrane;mitochondrion;nucleus;organelle lumen | catalytic activity;enzyme regulator activity;nucleotide binding;protein binding | 67.129 | 14.647 | 0.22 |
| Q02883   | N-acyl-phosphatidylethanolamine-hydrolyzing phospholipase D, mitochondrial [OS=Saccharomyces cerevisiae S288c]                                | 856001 | FMP30; YPL103C         | metabolic process                                                                                                             | membrane;mitochondrion                         | catalytic activity;metal ion binding                                            | 0.425  | 0.093  | 0.22 |
| P38969   | Pentamidine resistance factor, mitochondrial [OS=Saccharomyces cerevisiae S288c]                                                              | 854440 | PNT1; YOR266W          | cell organization and biogenesis;response to stimulus                                                                         | membrane;mitochondrion                         |                                                                                 | 0.359  | 0.08   | 0.22 |
| P38088   | Glycine--tRNA ligase 1, mitochondrial [OS=Saccharomyces cerevisiae S288c]                                                                     |        | GRS1                   | metabolic process                                                                                                             | cytoplasm;mitochondrion;organelle lumen        | catalytic activity;nucleotide binding;protein binding                           | 0.212  | 0.049  | 0.23 |
| P00560   | Phosphoglycerate kinase [OS=Saccharomyces cerevisiae S288c]                                                                                   | 850370 | PGK1; YCR012W          | metabolic process                                                                                                             | cytoplasm;membrane;mitochondrion               | catalytic activity;nucleotide binding                                           | 3.642  | 0.848  | 0.23 |
| P46681   | D-lactate dehydrogenase [cytochrome] 2, mitochondrial [OS=Saccharomyces cerevisiae S288c]                                                     | 851376 | DLD2; YDL178W          | metabolic process                                                                                                             | mitochondrion;organelle lumen                  | catalytic activity;nucleotide binding;protein binding                           | 0.682  | 0.16   | 0.23 |
| P32796-1 | Carnitine O-acetyltransferase, mitochondrial [OS=Saccharomyces cerevisiae S288c]                                                              | 854965 | CAT2; YML042W          | metabolic process;transport                                                                                                   | membrane;mitochondrion                         | catalytic activity                                                              | 9.578  | 2.252  | 0.24 |
| P36112   | MICOS complex subunit Mic60 [OS=Saccharomyces cerevisiae S288c]                                                                               | 853886 | FCI1; MIC60; YKR016W   | cell organization and biogenesis;transport                                                                                    | membrane;mitochondrion                         |                                                                                 | 12.895 | 3.047  | 0.24 |
| P02992   | elongation factor Tu, mitochondrial [OS=Saccharomyces cerevisiae S288c]                                                                       | 854359 | TUF1; YOR187W          | cell organization and biogenesis;metabolic process                                                                            | mitochondrion                                  | catalytic activity;nucleotide binding;RNA binding                               | 9      | 2.162  | 0.24 |
| P39952   | Mitochondrial inner membrane protein OXA1 [OS=Saccharomyces cerevisiae S288c]                                                                 | 856898 | OXA1; YER154W          | cell organization and biogenesis;transport                                                                                    | membrane;mitochondrion                         | transporter activity                                                            | 1.371  | 0.334  | 0.24 |
| P54783   | D-arabinono-1,4-lactone oxidase [OS=Saccharomyces cerevisiae S288c]                                                                           | 854888 | ALO1; YML086C          | metabolic process;response to stimulus                                                                                        | membrane;mitochondrion                         | catalytic activity;nucleotide binding                                           | 5.31   | 1.326  | 0.25 |
| P32316   | acetyl-CoA hydrolase [OS=Saccharomyces cerevisiae S288c]                                                                                      | 852266 | ACH1; YBL015W          | metabolic process                                                                                                             | cytoplasm;cytosol;mitochondrion                | catalytic activity                                                              | 20.544 | 5.136  | 0.25 |
| Q02784   | Monothiol glutaredoxin-5, mitochondrial [OS=Saccharomyces cerevisiae S288c]                                                                   | 856048 | GRX5; YPL059W          | cell organization and biogenesis;cellular homeostasis;metabolic process;regulation of biological process;response to stimulus | mitochondrion;organelle lumen                  | catalytic activity;metal ion binding                                            | 1.154  | 0.292  | 0.25 |
| P32317   | Protein AFG1 [OS=Saccharomyces cerevisiae S288c]                                                                                              | 856658 | AFG1; YEL052W          | cell organization and biogenesis;metabolic process;response to stimulus;transport                                             | membrane;mitochondrion                         | catalytic activity;nucleotide binding                                           | 0.995  | 0.259  | 0.26 |
| P40502   | Altered inheritance of mitochondria protein 19, mitochondrial [OS=Saccharomyces cerevisiae S288c]                                             | 854722 | AIM19; YIL087C         |                                                                                                                               | membrane;mitochondrion                         |                                                                                 | 0.995  | 0.259  | 0.26 |
| P53206   | putative cysteine synthase [OS=Saccharomyces cerevisiae S288c]                                                                                | 852895 | MCY1; YGR012W; YGR012W | metabolic process                                                                                                             |                                                | catalytic activity                                                              | 1.555  | 0.407  | 0.26 |
| P12695   | Dihydropolypyllysine-residue acetyltransferase component of pyruvate dehydrogenase complex, mitochondrial [OS=Saccharomyces cerevisiae S288c] | 855653 | LAT1; YNL071W          | metabolic process                                                                                                             | mitochondrion;organelle lumen                  | catalytic activity                                                              | 10.602 | 2.808  | 0.26 |
| P36517   | 54S ribosomal protein L4, mitochondrial [OS=Saccharomyces cerevisiae S288c]                                                                   | 851160 | MRPL4; YLR439W         | cell organization and biogenesis;metabolic process                                                                            | mitochondrion;ribosome                         | structural molecule activity                                                    | 0.874  | 0.233  | 0.27 |
| P10507   | mitochondrial-processing peptidase subunit beta [OS=Saccharomyces cerevisiae S288c]                                                           | 850860 | MAS1; YLR163C          | metabolic process;transport                                                                                                   | mitochondrion;organelle lumen                  | catalytic activity;metal ion binding;protein binding                            | 0.778  | 0.212  | 0.27 |
| P07246   | Alcohol dehydrogenase 3, mitochondrial [OS=Saccharomyces cerevisiae S288c]                                                                    | 855107 | ADH3; YMR083W          | metabolic process                                                                                                             | mitochondrion;organelle lumen                  | catalytic activity;metal ion binding                                            | 11.452 | 3.16   | 0.28 |
| P34222   | Peptidyl-tRNA hydrolase 2 [OS=Saccharomyces cerevisiae S288c]                                                                                 | 852223 | PTH2; YBL057C          | regulation of biological process                                                                                              | cytoplasm;cytosol;membrane;mitochondrion       | catalytic activity;protein binding                                              | 0.701  | 0.194  | 0.28 |
| Q05931   | Heat shock protein SSQ1, mitochondrial [OS=Saccharomyces cerevisiae S288c]                                                                    | 851084 | SSQ1; YLR369W          | cell organization and biogenesis;metabolic process                                                                            | mitochondrion;organelle lumen                  | nucleotide binding;protein binding                                              | 0.679  | 0.189  | 0.28 |
| P30902   | ATP synthase subunit d, mitochondrial [OS=Saccharomyces                                                                                       | 853853 | ATP7; YKL016           | metabolic process;transport                                                                                                   | membrane;mitochondrion                         | catalytic activity;transporter                                                  | 18.307 | 5.105  | 0.28 |

|        |                                                                                                   |        |                        |                                                                                     |                                                  |                                                                                     |        |        |      |
|--------|---------------------------------------------------------------------------------------------------|--------|------------------------|-------------------------------------------------------------------------------------|--------------------------------------------------|-------------------------------------------------------------------------------------|--------|--------|------|
|        | cerevisiae S288c]                                                                                 |        | C                      |                                                                                     |                                                  | r activity                                                                          |        |        |      |
| P09624 | Dihydropolypol dehydrogenase, mitochondrial [OS=Saccharomyces cerevisiae S288c]                   | 850527 | LPD1; YFL018C          | cellular homeostasis;metabolic process;regulation of biological process             | mitochondrion;organelle lumen                    | catalytic activity;nucleotide binding                                               | 43.367 | 12.111 | 0.28 |
| P37267 | Assembly factor cbp4 [OS=Saccharomyces cerevisiae S288c]                                          |        | CBP4                   | cell organization and biogenesis                                                    | membrane;mitochondrion                           |                                                                                     | 1.848  | 0.52   | 0.28 |
| P27929 | 37S ribosomal protein NAM9, mitochondrial [OS=Saccharomyces cerevisiae S288c]                     | 855585 | NAM9; YNL137C          | cell organization and biogenesis;metabolic process;regulation of biological process | mitochondrion;ribosome                           | RNA binding;structural molecule activity                                            | 1.062  | 0.301  | 0.28 |
| P28241 | Isocitrate dehydrogenase [NAD] subunit 2, mitochondrial [OS=Saccharomyces cerevisiae S288c]       | 854303 | IDH2; YOR136W          | metabolic process                                                                   | mitochondrion;organelle lumen                    | catalytic activity;metal ion binding;nucleotide binding;protein binding;RNA binding | 7.031  | 1.994  | 0.28 |
| P37299 | cytochrome b-c1 complex subunit 10 [OS=Saccharomyces cerevisiae S288c]                            | 856390 | QCR10; YHR001W-A       | metabolic process;transport                                                         | membrane;mitochondrion                           | catalytic activity;transporter activity                                             | 5.31   | 1.512  | 0.28 |
| P19414 | Aconitate hydratase, mitochondrial [OS=Saccharomyces cerevisiae S288c]                            | 851013 | ACO1; YLR304C          | cell organization and biogenesis;metabolic process;transport                        | cytoplasm;cytosol;mitochondrion;organelle lumen  | catalytic activity;DNA binding;metal ion binding                                    | 43.893 | 12.503 | 0.28 |
| P23180 | Probable oxidoreductase AIM17 [OS=Saccharomyces cerevisiae S288c]                                 | 856365 | AIM17; YHL021C         | cell organization and biogenesis;metabolic process                                  | mitochondrion                                    | catalytic activity;metal ion binding                                                | 3.467  | 0.995  | 0.29 |
| P14693 | sorting assembly machinery 35 kDa subunit [OS=Saccharomyces cerevisiae S288c]                     | 856483 | SAM35 ; YHR083W        | cell organization and biogenesis;transport                                          | membrane;mitochondrion                           | protein binding                                                                     | 0.54   | 0.155  | 0.29 |
| P41735 | 5-demethoxyubiquinone hydroxylase, mitochondrial [OS=Saccharomyces cerevisiae S288c]              | 854292 | CAT5; YOR125C          | metabolic process                                                                   | membrane;mitochondrion                           | catalytic activity;metal ion binding                                                | 0.54   | 0.155  | 0.29 |
| Q12375 | mitochondrial ornithine transporter 1 [OS=Saccharomyces cerevisiae S288c]                         | 854297 | ORT1; YOR130C          | metabolic process;transport                                                         | membrane;mitochondrion                           | structural molecule activity;transporter activity                                   | 0.54   | 0.155  | 0.29 |
| Q12031 | Mitochondrial 2-methylisocitrate lyase [OS=Saccharomyces cerevisiae S288c]                        | 856114 | ICL2; YPR006C          | metabolic process                                                                   | mitochondrion;organelle lumen                    | catalytic activity                                                                  | 3.281  | 0.947  | 0.29 |
| P32387 | 54S ribosomal protein L41, mitochondrial [OS=Saccharomyces cerevisiae S288c]                      | 852014 | MRP20 ; YDR405W        | cell organization and biogenesis;metabolic process                                  | mitochondrion;ribosome                           | nucleotide binding;protein binding;RNA binding;structural molecule activity         | 0.501  | 0.145  | 0.29 |
| P47127 | Altered inheritance of mitochondria protein 24, mitochondrial [OS=Saccharomyces cerevisiae S288c] | 853543 | AIM24; YJR080C         | cell organization and biogenesis                                                    | mitochondrion                                    |                                                                                     | 2.562  | 0.743  | 0.29 |
| P00401 | Cytochrome c oxidase subunit 1 [OS=Saccharomyces cerevisiae S288c]                                | 854598 | COX1; Q0045            | metabolic process;transport                                                         | membrane;mitochondrion                           | catalytic activity;metal ion binding;transporter activity                           | 1.61   | 0.468  | 0.29 |
| P43617 | Uncharacterized mitochondrial carrier YFR045W [OS=Saccharomyces cerevisiae S288c]                 | 850606 | YFR045W; YFR045W       | metabolic process;transport                                                         | membrane;mitochondrion                           | structural molecule activity;transporter activity                                   | 0.413  | 0.122  | 0.30 |
| P32792 | UPF0744 protein YSC83 [OS=Saccharomyces cerevisiae S288c]                                         | 856410 | YSC83; YHR017W         |                                                                                     | membrane;mitochondrion                           |                                                                                     | 0.369  | 0.11   | 0.30 |
| P53736 | Uncharacterized protein YNR040W [OS=Saccharomyces cerevisiae S288c]                               | 855776 | YNR040W; YNR040W       |                                                                                     | mitochondrion                                    |                                                                                     | 0.389  | 0.116  | 0.30 |
| P35180 | mitochondrial import receptor subunit Tom20 [OS=Saccharomyces cerevisiae S288c]                   | 852973 | TOM20 ; YGR082W        | cell organization and biogenesis;transport                                          | membrane;mitochondrion                           | protein binding;transporter activity                                                | 1.424  | 0.425  | 0.30 |
| P07275 | Delta-1-pyrroline-5-carboxylate dehydrogenase, mitochondrial [OS=Saccharomyces cerevisiae S288c]  | 856432 | PUT2; YHR037W          | metabolic process                                                                   | membrane;mitochondrion;organelle lumen           | catalytic activity                                                                  | 4.337  | 1.31   | 0.30 |
| P38702 | mitochondrial carrier protein LEU5 [OS=Saccharomyces cerevisiae S288c]                            | 856391 | LEU5; YHR002W          | metabolic process;transport                                                         | membrane;mitochondrion                           | structural molecule activity;transporter activity                                   | 0.334  | 0.101  | 0.30 |
| P34231 | Uncharacterized protein YKL187C [OS=Saccharomyces cerevisiae S288c]                               | 853648 | FAT3; YKL187C; YKL187C | cell organization and biogenesis;transport                                          | membrane;mitochondrion                           |                                                                                     | 0.304  | 0.093  | 0.31 |
| P48360 | Probable NADPH:adrenodoxin oxidoreductase, mitochondrial [OS=Saccharomyces cerevisiae S288c]      | 851982 | ARH1; YDR376W          | cellular homeostasis;metabolic process;transport                                    | cytoplasm;membrane;mitochondrion;organelle lumen | catalytic activity                                                                  | 0.25   | 0.077  | 0.31 |
| Q04172 | Sensitive to high expression protein 9, mitochondrial                                             | 852002 | SHE9; YDR39            | cell organization and biogenesis                                                    | membrane;mitochondrion                           |                                                                                     | 0.269  | 0.083  | 0.31 |

|        |                                                                                                                |         |                         |                                                                                                          |                                                          |                                                                   |        |        |      |
|--------|----------------------------------------------------------------------------------------------------------------|---------|-------------------------|----------------------------------------------------------------------------------------------------------|----------------------------------------------------------|-------------------------------------------------------------------|--------|--------|------|
|        | [OS=Saccharomyces cerevisiae S288c]                                                                            |         | 3W                      |                                                                                                          |                                                          |                                                                   |        |        |      |
| P36775 | Lon protease homolog, mitochondrial [OS=Saccharomyces cerevisiae S288c]                                        | 852259  | PIM1; YBL022C           | cell organization and biogenesis;metabolic process;regulation of biological process;response to stimulus | cytoplasm;mitochondrion;organelle lumen                  | catalytic activity;DNA binding;nucleotide binding;RNA binding     | 0.537  | 0.166  | 0.31 |
| P40495 | Homoisocitrate dehydrogenase, mitochondrial [OS=Saccharomyces cerevisiae S288c]                                | 854714  | LYS12; YIL094C          | metabolic process                                                                                        | mitochondrion                                            | catalytic activity;metal ion binding;nucleotide binding           | 5.19   | 1.61   | 0.31 |
| Q05892 | MIOREX complex component 2 [OS=Saccharomyces cerevisiae S288c]                                                 | 850997  | YLR290C; COQ11; YLR290C | metabolic process                                                                                        | mitochondrion                                            | catalytic activity                                                | 1.738  | 0.54   | 0.31 |
| P36525 | 54S ribosomal protein L24, mitochondrial [OS=Saccharomyces cerevisiae S288c]                                   | 855231  | MRPL24; YMR193W         | cell organization and biogenesis;metabolic process                                                       | mitochondrion;ribosome                                   | RNA binding;structural molecule activity                          | 1.154  | 0.359  | 0.31 |
| Q04728 | Arginine biosynthesis bifunctional protein ArgJ, mitochondrial [OS=Saccharomyces cerevisiae S288c]             | 855084  | ARG7; YMR062C           | metabolic process                                                                                        | mitochondrion;organelle lumen                            | catalytic activity                                                | 0.748  | 0.233  | 0.31 |
| Q06567 | ABC1 family protein MCP2 [OS=Saccharomyces cerevisiae S288c]                                                   | 850955  | MCP2; YLR253W           | cell organization and biogenesis                                                                         | membrane;mitochondrion                                   |                                                                   | 0.218  | 0.068  | 0.31 |
| P39722 | Mitochondrial Rho GTPase 1 [OS=Saccharomyces cerevisiae S288c]                                                 | 851249  | GEM1; YAL048C           | cell organization and biogenesis;regulation of biological process;response to stimulus;transport         | membrane;mitochondrion                                   | catalytic activity;metal ion binding;nucleotide binding           | 0.189  | 0.059  | 0.31 |
| P16622 | Ferrochelatase, mitochondrial [OS=Saccharomyces cerevisiae S288c]                                              | 854347  | HEM15; YOR176W          | metabolic process                                                                                        | membrane;mitochondrion                                   | catalytic activity                                                | 8.006  | 2.511  | 0.31 |
| P38071 | Enoyl-[acyl-carrier protein] reductase [NADPH, B-specific], mitochondrial [OS=Saccharomyces cerevisiae S288c]  | 852314  | ETR1; YBR026C           | metabolic process                                                                                        | mitochondrion;organelle lumen                            | catalytic activity;DNA binding;metal ion binding                  | 8.006  | 2.511  | 0.31 |
| P32898 | Mitochondrial presequence protease [OS=Saccharomyces cerevisiae S288c]                                         | 852041  | CYM1; YDR430C           | metabolic process                                                                                        | mitochondrion                                            | catalytic activity;metal ion binding                              | 0.505  | 0.16   | 0.32 |
| P19955 | 37S ribosomal protein YMR-31, mitochondrial [OS=Saccharomyces cerevisiae S288c]                                | 850610  | YMR31; YFR049W          | cell organization and biogenesis;metabolic process                                                       | mitochondrion;ribosome                                   | catalytic activity;protein binding;structural molecule activity   | 3.642  | 1.154  | 0.32 |
| Q01519 | Cytochrome c oxidase subunit 6b [OS=Saccharomyces cerevisiae S288c]                                            | 850727  | COX12; YLR038C          | cell organization and biogenesis;metabolic process;transport                                             | mitochondrion                                            | catalytic activity;transporter activity                           | 3.642  | 1.154  | 0.32 |
| Q3E824 | Uncharacterized protein YOR020W-A [OS=Saccharomyces cerevisiae S288c]                                          | 1466480 | YOR020W-A; YOR020W-A    | metabolic process;transport                                                                              | membrane;mitochondrion                                   |                                                                   | 3.642  | 1.154  | 0.32 |
| Q2V2P9 | Uncharacterized protein YDR119W-A [OS=Saccharomyces cerevisiae S288c]                                          | 3799970 | COX26; YDR119W-A        |                                                                                                          | membrane;mitochondrion                                   |                                                                   | 3.642  | 1.154  | 0.32 |
| P38771 | Ribosome-recycling factor, mitochondrial [OS=Saccharomyces cerevisiae S288c]                                   | 856433  | RRF1; YHR038W           | cell organization and biogenesis;metabolic process                                                       | mitochondrion                                            | RNA binding                                                       | 1.581  | 0.501  | 0.32 |
| P19882 | heat shock protein 60, mitochondrial [OS=Saccharomyces cerevisiae S288c]                                       | 850963  | HSP60; YLR259C          | cell organization and biogenesis;metabolic process;regulation of biological process;transport            | cytoplasm;cytosol;membrane;mitochondrion;organelle lumen | catalytic activity;DNA binding;nucleotide binding;protein binding | 36.927 | 11.743 | 0.32 |
| P36151 | Uncharacterized protein YKR070W [OS=Saccharomyces cerevisiae S288c]                                            | 853944  | YKR070W; YKR070W        | metabolic process                                                                                        | mitochondrion                                            |                                                                   | 0.833  | 0.274  | 0.33 |
| P08417 | fumarate hydratase, mitochondrial [OS=Saccharomyces cerevisiae S288c]                                          | 855866  | FUM1; YPL262W           | cell organization and biogenesis;metabolic process                                                       | cytoplasm;cytosol;mitochondrion;organelle lumen          | catalytic activity                                                | 6.88   | 2.29   | 0.33 |
| P53292 | 37S ribosomal protein S35, mitochondrial [OS=Saccharomyces cerevisiae S288c]                                   | 853075  | MRP53; YGR165W          | cell organization and biogenesis;metabolic process                                                       | mitochondrion;ribosome                                   | structural molecule activity                                      | 1.754  | 0.585  | 0.33 |
| P16387 | Pyruvate dehydrogenase E1 component subunit alpha, mitochondrial [OS=Saccharomyces cerevisiae S288c]           | 856925  | PDA1; YER178W           | cell growth;metabolic process                                                                            | mitochondrion;organelle lumen                            | catalytic activity                                                | 13.497 | 4.52   | 0.33 |
| P47052 | succinate dehydrogenase [ubiquinone] flavoprotein subunit 2, mitochondrial [OS=Saccharomyces cerevisiae S288c] | 853405  | YJL045W; YJL045W        | metabolic process;transport                                                                              | membrane;mitochondrion                                   | catalytic activity;nucleotide binding                             | 2.932  | 0.983  | 0.34 |
| P51998 | 54S ribosomal protein yml6, mitochondrial [OS=Saccharomyces cerevisiae S288c]                                  | 854983  | YML6; YML025C           | cell organization and biogenesis;metabolic process                                                       | mitochondrion;ribosome                                   | RNA binding;structural molecule activity                          | 0.73   | 0.245  | 0.34 |
| P38885 | Altered inheritance of mitochondria protein 46, mitochondrial [OS=Saccharomyces cerevisiae S288c]              | 856606  | AIM46; YHR199C          |                                                                                                          | mitochondrion                                            | catalytic activity                                                | 1.154  | 0.389  | 0.34 |



|          |                                                                                                   |        |                       |                                                                                                             |                                                  |                                                              |        |        |      |
|----------|---------------------------------------------------------------------------------------------------|--------|-----------------------|-------------------------------------------------------------------------------------------------------------|--------------------------------------------------|--------------------------------------------------------------|--------|--------|------|
| Q03430   | 37S ribosomal protein RSM28, mitochondrial [OS=Saccharomyces cerevisiae S288c]                    | 852105 | RSM28; YDR494W        | cell organization and biogenesis;metabolic process                                                          | mitochondrion;ribosome                           | structural molecule activity                                 | 0.65   | 0.222  | 0.34 |
| P25719   | Peptidyl-prolyl cis-trans isomerase C, mitochondrial [OS=Saccharomyces cerevisiae S288c]          | 854897 | CPR3; YML078W         | cell death;metabolic process                                                                                | mitochondrion;organelle lumen                    | catalytic activity                                           | 2.415  | 0.848  | 0.35 |
| P32191   | Glycerol-3-phosphate dehydrogenase, mitochondrial [OS=Saccharomyces cerevisiae S288c]             | 854651 | GUT2; YIL155C         | metabolic process                                                                                           | membrane;mitochondrion                           | catalytic activity                                           | 6.827  | 2.403  | 0.35 |
| P00924   | Enolase 1 [OS=Saccharomyces cerevisiae S288c]                                                     | 853169 | ENO1; YGR254W         | metabolic process;regulation of biological process                                                          | cytoplasm;cytosol;membrane;mitochondrion;vacuole | catalytic activity;metal ion binding;protein binding         | 1.326  | 0.468  | 0.35 |
| P32843   | Mitochondrial escape protein 2 [OS=Saccharomyces cerevisiae S288c]                                | 855348 | YME2; YMR302C         | cell organization and biogenesis;metabolic process                                                          | membrane;mitochondrion                           | nucleotide binding;RNA binding                               | 2.36   | 0.833  | 0.35 |
| P42940   | Probable electron transfer flavoprotein subunit beta [OS=Saccharomyces cerevisiae S288c]          | 853121 | CIR1; YGR207C         | metabolic process;transport                                                                                 | mitochondrion;organelle lumen                    |                                                              | 3.87   | 1.371  | 0.35 |
| P04840   | Mitochondrial outer membrane protein porin 1 [OS=Saccharomyces cerevisiae S288c]                  | 855669 | POR1; YNL055C         | cell death;cell organization and biogenesis;cellular homeostasis;regulation of biological process;transport | cytoplasm;membrane;mitochondrion                 | transporter activity                                         | 25.367 | 9      | 0.35 |
| P07213   | Mitochondrial import receptor subunit TOM70 [OS=Saccharomyces cerevisiae S288c]                   | 855602 | TOM70 ; YNL121C       | cell organization and biogenesis;transport                                                                  | membrane;mitochondrion                           | protein binding;transporter activity                         | 2.257  | 0.805  | 0.36 |
| P39726   | Glycine cleavage system H protein, mitochondrial [OS=Saccharomyces cerevisiae S288c]              | 851254 | GCV3; YAL044C         | metabolic process                                                                                           | mitochondrion                                    | catalytic activity                                           | 4.995  | 1.783  | 0.36 |
| P07806   | Valine-tRNA ligase, mitochondrial [OS=Saccharomyces cerevisiae S288c]                             | 852986 | VAS1; YGR094W         | metabolic process;regulation of biological process                                                          | cytoplasm;cytosol;mitochondrion                  | catalytic activity;nucleotide binding                        | 0.377  | 0.136  | 0.36 |
| P09440   | C-1-tetrahydrofolate synthase, mitochondrial [OS=Saccharomyces cerevisiae S288c]                  | 852378 | MIS1; YBR084W         | metabolic process                                                                                           | cytosol;mitochondrion                            | catalytic activity;nucleotide binding                        | 0.829  | 0.302  | 0.36 |
| Q12298   | uncharacterized ABC transporter ATP-binding protein YDR061W [OS=Saccharomyces cerevisiae S288c]   | 851633 | YDR061W; YDR061W      |                                                                                                             | mitochondrion                                    | catalytic activity;nucleotide binding                        | 0.343  | 0.125  | 0.36 |
| P34227   | Mitochondrial peroxiredoxin PRX1 [OS=Saccharomyces cerevisiae S288c]                              | 852215 | PRX1; YBL064C         | cellular homeostasis;metabolic process;regulation of biological process;response to stimulus                | mitochondrion                                    | antioxidant activity;catalytic activity                      | 4.456  | 1.637  | 0.37 |
| P07143   | Cytochrome c1, heme protein, mitochondrial [OS=Saccharomyces cerevisiae S288c]                    | 854231 | CYT1; YOR065W         | metabolic process;transport                                                                                 | cytosol;membrane;mitochondrion                   | metal ion binding                                            | 13.251 | 4.878  | 0.37 |
| P23644   | Mitochondrial import receptor subunit TOM40 [OS=Saccharomyces cerevisiae S288c]                   | 855243 | TOM40 ; YMR203W       | transport                                                                                                   | cytosol;membrane;mitochondrion                   | protein binding;transporter activity                         | 1.783  | 0.668  | 0.37 |
| P06208-1 | 2-isopropylmalate synthase [OS=Saccharomyces cerevisiae S288c]                                    | 855619 | LEU4; YNL104C         | metabolic process                                                                                           | cytoplasm;mitochondrion                          | catalytic activity;protein binding                           | 6.017  | 2.257  | 0.38 |
| Q01852   | Mitochondrial import inner membrane translocase subunit TIM44 [OS=Saccharomyces cerevisiae S288c] | 854790 | TIM44; YIL022W        | transport                                                                                                   | membrane;mitochondrion                           | nucleotide binding;protein binding                           | 5.404  | 2.047  | 0.38 |
| Q12029   | Probable mitochondrial transport protein fsf1 [OS=Saccharomyces cerevisiae S288c]                 | 854445 | FSF1; YOR271C         | transport                                                                                                   | membrane;mitochondrion                           | transporter activity                                         | 1.637  | 0.624  | 0.38 |
| P33311   | ATP-dependent permease MDL2, mitochondrial [OS=Saccharomyces cerevisiae S288c]                    | 855858 | MDL2; YPL270W         | response to stimulus;transport                                                                              | membrane;mitochondrion                           | catalytic activity;nucleotide binding;transporter activity   | 0.802  | 0.307  | 0.38 |
| P25374   | Cysteine desulfurase, mitochondrial [OS=Saccharomyces cerevisiae S288c]                           | 850343 | NFS1; YCL017C         | cell organization and biogenesis;cellular homeostasis;metabolic process                                     | mitochondrion;nucleus                            | catalytic activity;metal ion binding;protein binding         | 1.346  | 0.532  | 0.40 |
| P50945   | MICOS complex subunit MIC27 [OS=Saccharomyces cerevisiae S288c]                                   | 855623 | AIM37; MIC27; YNL100W | cell organization and biogenesis                                                                            | membrane;mitochondrion                           |                                                              | 1.254  | 0.501  | 0.40 |
| P33416   | Heat shock protein 78, mitochondrial [OS=Saccharomyces cerevisiae S288c]                          | 851845 | HSP78; YDR258C        | cell organization and biogenesis;metabolic process;regulation of biological process;response to stimulus    | mitochondrion;organelle lumen                    | catalytic activity;nucleotide binding;protein binding        | 2.609  | 1.049  | 0.40 |
| P32335   | Protein MSS51, mitochondrial [OS=Saccharomyces cerevisiae S288c]                                  | 850900 | MSS51; YLR203C        | metabolic process;regulation of biological process                                                          | membrane;mitochondrion                           | protein binding;translational regulator activity             | 1.154  | 0.468  | 0.41 |
| P01097   | ATPase inhibitor, mitochondrial [OS=Saccharomyces cerevisiae S288c]                               | 851347 | INH1; YDL181W         | metabolic process;regulation of biological process                                                          | mitochondrion                                    | catalytic activity;enzyme regulator activity;protein binding | 1.154  | 0.468  | 0.41 |
| P17505   | Malate dehydrogenase, mitochondrial [OS=Saccharomyces cerevisiae S288c]                           | 853777 | MDH1; YKL085W         | metabolic process                                                                                           | mitochondrion;organelle lumen                    | catalytic activity;protein binding;RNA                       | 56.797 | 23.041 | 0.41 |

|        |                                                                                                                                                     |        |                      |                                                                                                        |                                  |                                                                                |        |        |      |
|--------|-----------------------------------------------------------------------------------------------------------------------------------------------------|--------|----------------------|--------------------------------------------------------------------------------------------------------|----------------------------------|--------------------------------------------------------------------------------|--------|--------|------|
|        |                                                                                                                                                     |        |                      |                                                                                                        |                                  | binding                                                                        |        |        |      |
| P37292 | Serine hydroxymethyltransferase, mitochondrial [OS=Saccharomyces cerevisiae S288c]                                                                  | 852565 | SHM1; YBR263W        | metabolic process                                                                                      | mitochondrion                    | catalytic activity                                                             | 5.579  | 2.275  | 0.41 |
| P19262 | Dihydrolipoylysine-residue succinyltransferase component of 2-oxoglutarate dehydrogenase complex, mitochondrial [OS=Saccharomyces cerevisiae S288c] | 851726 | KGD2; YDR148C        | cell organization and biogenesis;metabolic process                                                     | mitochondrion                    | catalytic activity;protein binding                                             | 5.7    | 2.325  | 0.41 |
| Q01163 | 37S ribosomal protein S23, mitochondrial [OS=Saccharomyces cerevisiae S288c]                                                                        | 852748 | RSM23; YGL129C       | cell organization and biogenesis;metabolic process                                                     | mitochondrion;ribosome           | catalytic activity;nucleotide binding;RNA binding;structural molecule activity | 1.11   | 0.453  | 0.41 |
| Q03798 | Altered inheritance of mitochondria protein 36, mitochondrial [OS=Saccharomyces cerevisiae S288c]                                                   | 855189 | AIM36; YMR157C       |                                                                                                        | membrane;mitochondrion           |                                                                                | 1.069  | 0.438  | 0.41 |
| P46367 | Potassium-activated aldehyde dehydrogenase, mitochondrial [OS=Saccharomyces cerevisiae S288c]                                                       | 854556 | ALD4; YOR374W        | metabolic process                                                                                      | mitochondrion;organelle lumen    | catalytic activity                                                             | 50.795 | 21.022 | 0.41 |
| P50087 | MICOS subunit MIC26 [OS=Saccharomyces cerevisiae S288c]                                                                                             | 853150 | MOS2; MIC26; YGR235C | cell organization and biogenesis                                                                       | membrane;mitochondrion           |                                                                                | 0.931  | 0.389  | 0.42 |
| P32473 | Pyruvate dehydrogenase E1 component subunit beta, mitochondrial [OS=Saccharomyces cerevisiae S288c]                                                 | 852522 | PDB1; YBR221C        | metabolic process                                                                                      | mitochondrion;organelle lumen    | catalytic activity                                                             | 9      | 3.833  | 0.43 |
| P38825 | Protein TOM71 [OS=Saccharomyces cerevisiae S288c]                                                                                                   | 856517 | TOM71 ; YHR117W      | transport                                                                                              | membrane;mitochondrion           | protein binding;transporter activity                                           | 0.805  | 0.343  | 0.43 |
| Q06485 | Autophagy-related protein 33 [OS=Saccharomyces cerevisiae S288c]                                                                                    | 851070 | ATG33; YLR356W       | cell communication;metabolic process;response to stimulus                                              | membrane;mitochondrion           |                                                                                | 0.778  | 0.334  | 0.43 |
| P39515 | mitochondrial import inner membrane translocase subunit Tim17 [OS=Saccharomyces cerevisiae S288c]                                                   | 853298 | TIM17; YJL143W       | cell organization and biogenesis;transport                                                             | membrane;mitochondrion           | protein binding;transporter activity                                           | 0.778  | 0.334  | 0.43 |
| P53889 | uncharacterized mitochondrial hydrolase FMP41 [OS=Saccharomyces cerevisiae S288c]                                                                   | 855553 | FMP41; YNL168C       | metabolic process                                                                                      | mitochondrion                    | catalytic activity;metal ion binding                                           | 0.719  | 0.311  | 0.43 |
| P53220 | Mitochondrial import inner membrane translocase subunit TIM21 [OS=Saccharomyces cerevisiae S288c]                                                   | 852921 | TIM21; YGR033C       | cell organization and biogenesis;transport                                                             | membrane;mitochondrion           | protein binding                                                                | 0.719  | 0.311  | 0.43 |
| P17558 | 37S ribosomal protein PET123, mitochondrial [OS=Saccharomyces cerevisiae S288c]                                                                     | 854329 | PET123 ; YOR158W     | cell organization and biogenesis;metabolic process                                                     | mitochondrion;ribosome           | structural molecule activity                                                   | 0.668  | 0.292  | 0.44 |
| P53732 | 37S ribosomal protein S12, mitochondrial [OS=Saccharomyces cerevisiae S288c]                                                                        | 855772 | MRP512; YNR036C      | cell organization and biogenesis;metabolic process                                                     | mitochondrion;ribosome           | structural molecule activity                                                   | 0.668  | 0.292  | 0.44 |
| P28817 | 3-hydroxyisobutyryl-CoA hydrolase, mitochondrial [OS=Saccharomyces cerevisiae S288c]                                                                | 851606 | EHD3; YDR036C        | metabolic process                                                                                      | mitochondrion                    | catalytic activity                                                             | 0.61   | 0.269  | 0.44 |
| P12686 | 37S ribosomal protein MRP13, mitochondrial [OS=Saccharomyces cerevisiae S288c]                                                                      | 852975 | MRP13 ; YGR084C      | cell organization and biogenesis;metabolic process                                                     | mitochondrion;ribosome           | structural molecule activity                                                   | 0.585  | 0.259  | 0.44 |
| P32453 | Protein ATP11, mitochondrial [OS=Saccharomyces cerevisiae S288c]                                                                                    | 855401 | ATP11; YNL315C       | cell organization and biogenesis                                                                       | mitochondrion                    | protein binding                                                                | 0.585  | 0.259  | 0.44 |
| P23641 | mitochondrial phosphate carrier protein [OS=Saccharomyces cerevisiae S288c]                                                                         | 853540 | MIR1; YJR077C        | metabolic process;transport                                                                            | membrane;mitochondrion           | protein binding;structural molecule activity;transporter activity              | 26.826 | 11.915 | 0.44 |
| P53881 | 54S ribosomal protein L22, mitochondrial [OS=Saccharomyces cerevisiae S288c]                                                                        | 855544 | MRPL22; YNL177C      | cell organization and biogenesis;metabolic process                                                     | mitochondrion;ribosome           | RNA binding;structural molecule activity                                       | 0.551  | 0.245  | 0.44 |
| P32860 | NifU-like protein, mitochondrial [OS=Saccharomyces cerevisiae S288c]                                                                                | 853826 | NFU1; YKL040C        | cell organization and biogenesis;cellular homeostasis;metabolic process                                | mitochondrion;organelle lumen    | metal ion binding                                                              | 1.738  | 0.778  | 0.45 |
| P25372 | Thioredoxin-3, mitochondrial [OS=Saccharomyces cerevisiae S288c]                                                                                    | 850444 | TRX3; YCR083W        | cellular homeostasis;metabolic process;regulation of biological process;response to stimulus;transport | cytoplasm;mitochondrion          | catalytic activity                                                             | 0.52   | 0.233  | 0.45 |
| P22136 | ATPase expression protein 2, mitochondrial [OS=Saccharomyces cerevisiae S288c]                                                                      | 855325 | AEP2; YMR282C        | metabolic process;regulation of biological process                                                     | mitochondrion                    | RNA binding                                                                    | 0.506  | 0.227  | 0.45 |
| P40341 | Mitochondrial respiratory chain complexes assembly protein YTA12                                                                                    | 855114 | YTA12; YMR08         | cell organization and biogenesis;metabolic                                                             | cytoplasm;membrane;mitochondrion | catalytic activity;metal ion                                                   | 1.575  | 0.707  | 0.45 |

|        |                                                                                                           |        |                |                                                                                                          |                                          |                                                                                |       |       |      |
|--------|-----------------------------------------------------------------------------------------------------------|--------|----------------|----------------------------------------------------------------------------------------------------------|------------------------------------------|--------------------------------------------------------------------------------|-------|-------|------|
|        | [OS=Saccharomyces cerevisiae S288c]                                                                       |        | 9C             | process;response to stimulus;transport                                                                   |                                          | binding;nucleotide binding;protein binding                                     |       |       |      |
| P35191 | DnaJ homolog 1, mitochondrial [OS=Saccharomyces cerevisiae S288c]                                         | 850530 | MDJ1; YFL016C  | cell organization and biogenesis;metabolic process;regulation of biological process;response to stimulus | mitochondrion;organelle lumen            | enzyme regulator activity;metal ion binding;nucleotide binding;protein binding | 1.656 | 0.748 | 0.45 |
| P40416 | Iron-sulfur clusters transporter ATM1, mitochondrial [OS=Saccharomyces cerevisiae S288c]                  | 855347 | ATM1; YMR301C  | cellular homeostasis;metabolic process;transport                                                         | membrane;mitochondrion                   | catalytic activity;nucleotide binding;transporter activity                     | 0.453 | 0.205 | 0.45 |
| P33310 | ATP-dependent permease MDL1, mitochondrial [OS=Saccharomyces cerevisiae S288c]                            | 850885 | MDL1; YLR188W  | transport                                                                                                | membrane;mitochondrion                   | catalytic activity;nucleotide binding;transporter activity                     | 0.438 | 0.199 | 0.45 |
| Q03327 | Mitochondrial fusion and transport protein Ugo1 [OS=Saccharomyces cerevisiae S288c]                       | 852081 | UGO1; YDR470C  | cell organization and biogenesis;metabolic process                                                       | membrane;mitochondrion                   | protein binding;structural molecule activity                                   | 0.425 | 0.194 | 0.46 |
| P53230 | Phosphatidate cytidyltransferase, mitochondrial [OS=Saccharomyces cerevisiae S288c]                       | 852937 | TAM41; YGR046W | metabolic process                                                                                        | membrane;mitochondrion;organelle lumen   | catalytic activity                                                             | 0.407 | 0.186 | 0.46 |
| P40053 | Altered inheritance of mitochondria protein 9, mitochondrial [OS=Saccharomyces cerevisiae S288c]          | 856813 | AIM9; YER080W  |                                                                                                          | mitochondrion                            |                                                                                | 1.938 | 0.891 | 0.46 |
| Q03246 | 37S ribosomal protein S17, mitochondrial [OS=Saccharomyces cerevisiae S288c]                              | 855226 | MRP17; YMR188C | cell differentiation;cell organization and biogenesis;metabolic process                                  | mitochondrion;ribosome                   | RNA binding;structural molecule activity                                       | 0.389 | 0.179 | 0.46 |
| P25039 | Elongation factor G, mitochondrial [OS=Saccharomyces cerevisiae S288c]                                    | 850758 | MEF1; YLR069C  | cell organization and biogenesis;metabolic process                                                       | cytosol;mitochondrion                    | catalytic activity;nucleotide binding;RNA binding                              | 0.326 | 0.151 | 0.46 |
| P41921 | glutathione reductase [OS=Saccharomyces cerevisiae S288c]                                                 | 856014 | GLR1; YPL091W  | cellular homeostasis;metabolic process;regulation of biological process;response to stimulus             | cytoplasm;cytosol;mitochondrion;nucl eus | antioxidant activity;catalytic activity;nucleotide binding                     | 0.334 | 0.155 | 0.46 |
| Q04472 | Mitochondrial inner membrane i-AAA protease supercomplex subunit MGR3 [OS=Saccharomyces cerevisiae S288c] | 855142 | MGR3; YMR115W  | metabolic process                                                                                        | membrane;mitochondrion                   | protein binding                                                                | 0.322 | 0.15  | 0.47 |
| P05626 | ATP synthase subunit 4, mitochondrial [OS=Saccharomyces cerevisiae S288c]                                 | 856027 | ATP4; YPL078C  | cell organization and biogenesis;metabolic process;transport                                             | membrane;mitochondrion                   | catalytic activity;transporter activity                                        | 7.799 | 3.642 | 0.47 |
| P38910 | 10 kDa heat shock protein, mitochondrial [OS=Saccharomyces cerevisiae S288c]                              | 854185 | HSP10; YOR020C | cell organization and biogenesis;metabolic process;response to stimulus;transport                        | cytoplasm;mitochondrion;organelle lumen  | metal ion binding;nucleotide binding;protein binding                           | 4.623 | 2.162 | 0.47 |
| P21306 | ATP synthase subunit epsilon, mitochondrial [OS=Saccharomyces cerevisiae S288c]                           | 855857 | ATP15; YPL271W | metabolic process;transport                                                                              | membrane;mitochondrion                   | catalytic activity;transporter activity                                        | 4.623 | 2.162 | 0.47 |
| P48015 | Aminomethyltransferase, mitochondrial [OS=Saccharomyces cerevisiae S288c]                                 | 851582 | GCV1; YDR019C  | metabolic process                                                                                        | mitochondrion                            | catalytic activity;protein binding                                             | 5.7   | 2.675 | 0.47 |
| P12687 | S4S ribosomal protein L2, mitochondrial [OS=Saccharomyces cerevisiae S288c]                               | 855727 | MRP7; YNL005C  | cell organization and biogenesis;metabolic process                                                       | mitochondrion;ribosome                   | catalytic activity;RNA binding;structural molecule activity                    | 0.233 | 0.11  | 0.47 |
| Q05648 | MIOREX complex component 10 [OS=Saccharomyces cerevisiae S288c]                                           | 851876 | MRX10; YDR282C |                                                                                                          | membrane;mitochondrion                   |                                                                                | 0.222 | 0.105 | 0.47 |
| P36163 | mitochondrial metalloendopeptidase OMA1 [OS=Saccharomyces cerevisiae S288c]                               | 853962 | OMA1; YKR087C  | metabolic process                                                                                        | membrane;mitochondrion                   | catalytic activity;metal ion binding                                           | 0.245 | 0.116 | 0.47 |
| P50110 | Sorting assembly machinery 37 kDa subunit [OS=Saccharomyces cerevisiae S288c]                             | 855082 | SAM37; YMR060C | cell organization and biogenesis;transport                                                               | membrane;mitochondrion                   | protein binding                                                                | 0.245 | 0.116 | 0.47 |
| P40047 | Aldehyde dehydrogenase 5, mitochondrial [OS=Saccharomyces cerevisiae S288c]                               | 856804 | ALD5; YER073W  | metabolic process                                                                                        | mitochondrion;organelle lumen            | catalytic activity                                                             | 1.762 | 0.84  | 0.48 |
| Q06143 | mitochondrial dicarboxylate transporter [OS=Saccharomyces cerevisiae S288c]                               | 851063 | DIC1; YLR348C  | metabolic process;transport                                                                              | membrane;mitochondrion                   | structural molecule activity;transporter activity                              | 1.154 | 0.551 | 0.48 |
| P25605 | Acetolactate synthase small subunit, mitochondrial [OS=Saccharomyces cerevisiae S288c]                    | 850348 | ILV6; YCL009C  | metabolic process;regulation of biological process                                                       | mitochondrion                            | catalytic activity;enzyme regulator activity                                   | 2.793 | 1.336 | 0.48 |
| P32839 | Mitochondrial chaperone BCS1 [OS=Saccharomyces cerevisiae S288c]                                          | 851981 | BCS1; YDR375C  | cell organization and biogenesis;metabolic process;response to stimulus;transport                        | cytosol;membrane;mitochondrion           | catalytic activity;nucleotide binding;transporter activity                     | 0.194 | 0.093 | 0.48 |
| P38909 | cytochrome c mitochondrial import factor CYC2 [OS=Saccharomyces cerevisiae S288c]                         | 854202 | CYC2; YOR037W  | cell organization and biogenesis;metabolic process                                                       | membrane;mitochondrion                   | catalytic activity                                                             | 0.194 | 0.093 | 0.48 |

|        |                                                                                                                      |        |                        |                                                                                   |                                              |                                                                           |        |        |      |
|--------|----------------------------------------------------------------------------------------------------------------------|--------|------------------------|-----------------------------------------------------------------------------------|----------------------------------------------|---------------------------------------------------------------------------|--------|--------|------|
| P03879 | Intron-encoded RNA maturase bl4 [OS=Saccharomyces cerevisiae S288c]                                                  | 854582 | BI4; Q0120             | metabolic process                                                                 | membrane;mitochondrion                       | catalytic activity;RNA binding                                            | 0.179  | 0.086  | 0.48 |
| Q07500 | External NADH-ubiquinone oxidoreductase 2, mitochondrial [OS=Saccharomyces cerevisiae S288c]                         | 851474 | NDE2; YDL085W          | metabolic process                                                                 | mitochondrion                                | catalytic activity;nucleotide binding                                     | 4.012  | 1.929  | 0.48 |
| P25345 | Asparagine-tRNA ligase, mitochondrial [OS=Saccharomyces cerevisiae S288c]                                            | 850388 | SLM5; YCR024C          | metabolic process                                                                 | cytoplasm;mitochondrion;organelle lumen      | catalytic activity;nucleotide binding                                     | 0.172  | 0.083  | 0.48 |
| Q07349 | MIOREX complex component 9 [OS=Saccharomyces cerevisiae S288c]                                                       | 851535 | YDL027C; MRX9; YDL027C |                                                                                   | endoplasmic reticulum;membrane;mitochondrion |                                                                           | 1.913  | 0.931  | 0.49 |
| P40215 | External NADH-ubiquinone oxidoreductase 1, mitochondrial [OS=Saccharomyces cerevisiae S288c]                         | 855176 | NDE1; YMR145C          | metabolic process                                                                 | mitochondrion                                | catalytic activity;nucleotide binding                                     | 5.078  | 2.472  | 0.49 |
| P38988 | Mitochondrial GTP/GDP carrier protein 1 [OS=Saccharomyces cerevisiae S288c]                                          | 851329 | GGC1; YDL198C          | cell organization and biogenesis;cellular homeostasis;metabolic process;transport | membrane;mitochondrion                       | structural molecule activity;transporter activity                         | 4.78   | 2.34   | 0.49 |
| P09457 | ATP synthase subunit 5, mitochondrial [OS=Saccharomyces cerevisiae S288c]                                            | 851892 | ATP5; YDR298C          | metabolic process;transport                                                       | membrane;mitochondrion                       | catalytic activity;transporter activity                                   | 13.678 | 6.743  | 0.49 |
| P53598 | Succinyl-CoA ligase [ADP-forming] subunit alpha, mitochondrial [OS=Saccharomyces cerevisiae S288c]                   | 854310 | LSC1; YOR142W          | metabolic process                                                                 | cytosol;mitochondrion                        | catalytic activity;nucleotide binding                                     | 10.288 | 5.158  | 0.50 |
| Q08822 | Probable electron transfer flavoprotein-ubiquinone oxidoreductase, mitochondrial [OS=Saccharomyces cerevisiae S288c] | 854538 | CIR2; YOR356W          | metabolic process;transport                                                       | membrane;mitochondrion                       | catalytic activity;metal ion binding;nucleotide binding                   | 2.481  | 1.26   | 0.51 |
| P06168 | ketol-acid reductoisomerase, mitochondrial [OS=Saccharomyces cerevisiae S288c]                                       | 851069 | ILV5; YLR355C          | cell organization and biogenesis;metabolic process                                | mitochondrion                                | catalytic activity;DNA binding;metal ion binding                          | 9.857  | 5.105  | 0.52 |
| Q03028 | Mitochondrial 2-oxodicarboxylate carrier 1 [OS=Saccharomyces cerevisiae S288c]                                       | 855969 | ODC1; YPL134C          | metabolic process;transport                                                       | membrane;mitochondrion                       | structural molecule activity;transporter activity                         | 4.995  | 2.594  | 0.52 |
| Q07651 | SUR7 family protein FMP45 [OS=Saccharomyces cerevisiae S288c]                                                        | 851304 | FMP45; YDL222C         | cell differentiation;cell organization and biogenesis                             | membrane;mitochondrion                       |                                                                           | 6.017  | 3.125  | 0.52 |
| P07257 | Cytochrome b-c1 complex subunit 2, mitochondrial [OS=Saccharomyces cerevisiae S288c]                                 | 856321 | QCR2; YPR191W          | metabolic process;transport                                                       | membrane;mitochondrion                       | catalytic activity;metal ion binding;protein binding;transporter activity | 33.551 | 17.588 | 0.52 |
| P40035 | Mitochondrial phosphate carrier protein 2 [OS=Saccharomyces cerevisiae S288c]                                        | 856779 | PIC2; YER053C          | cellular homeostasis;metabolic process;transport                                  | membrane;mitochondrion                       | structural molecule activity;transporter activity                         | 0.833  | 0.438  | 0.53 |
| P00044 | Cytochrome c iso-1 [OS=Saccharomyces cerevisiae S288c]                                                               | 853507 | CYC1; YJR048W          | metabolic process;transport                                                       | mitochondrion                                | metal ion binding;protein binding                                         | 12.335 | 6.499  | 0.53 |
| P07342 | Acetolactate synthase catalytic subunit, mitochondrial [OS=Saccharomyces cerevisiae S288c]                           | 855135 | ILV2; YMR108W          | metabolic process                                                                 | mitochondrion                                | catalytic activity;metal ion binding;nucleotide binding                   | 4.223  | 2.257  | 0.53 |
| P25573 | Mitochondrial inner membrane i-AAA protease supercomplex subunit MGR1 [OS=Saccharomyces cerevisiae S288c]            | 850313 | MGR1; YCL044C          | metabolic process                                                                 | membrane;mitochondrion                       | protein binding                                                           | 1.031  | 0.557  | 0.54 |
| P08466 | mitochondrial nuclease [OS=Saccharomyces cerevisiae S288c]                                                           | 853222 | NUC1; YJL208C          | cell death;metabolic process                                                      | membrane;mitochondrion;nucleus               | catalytic activity;metal ion binding                                      | 1.976  | 1.069  | 0.54 |
| P08067 | cytochrome b-c1 complex subunit Rieske, mitochondrial [OS=Saccharomyces cerevisiae S288c]                            | 856689 | RIP1; YEL024W          | metabolic process;transport                                                       | membrane;mitochondrion                       | catalytic activity;metal ion binding;transporter activity                 | 25.102 | 13.678 | 0.54 |
| Q06493 | LETM1 domain-containing protein YLH47, mitochondrial [OS=Saccharomyces cerevisiae S288c]                             | 856243 | YLH47; YPR125W         | cell organization and biogenesis;transport                                        | membrane;mitochondrion                       |                                                                           | 0.487  | 0.269  | 0.55 |
| Q96VH5 | MICOS complex subunit Mic10 [OS=Saccharomyces cerevisiae S288c]                                                      | 850300 | MOS1; MIC10; YCL057C-A | cell organization and biogenesis                                                  | membrane;mitochondrion                       |                                                                           | 1.683  | 0.931  | 0.55 |
| P39925 | Mitochondrial respiratory chain complexes assembly protein AFG3 [OS=Saccharomyces cerevisiae S288c]                  | 856737 | AFG3; YER017C          | cell organization and biogenesis;metabolic process;response to stimulus;transport | membrane;mitochondrion                       | catalytic activity;metal ion binding;nucleotide binding;protein binding   | 1.015  | 0.569  | 0.56 |
| Q06405 | ATP synthase subunit f, mitochondrial [OS=Saccharomyces cerevisiae S288c]                                            | 851983 | ATP17; YDR377W         | metabolic process;transport                                                       | membrane;mitochondrion                       | catalytic activity;transporter activity                                   | 5.31   | 2.981  | 0.56 |

|        |                                                                                                            |        |                        |                                                                                                  |                                                               |                                                                            |        |        |      |
|--------|------------------------------------------------------------------------------------------------------------|--------|------------------------|--------------------------------------------------------------------------------------------------|---------------------------------------------------------------|----------------------------------------------------------------------------|--------|--------|------|
| P04710 | ADP,ATP carrier protein 1 [OS=Saccharomyces cerevisiae S288c]                                              | 855078 | AAC1; YMR056C          | metabolic process;transport                                                                      | cytosol;membrane;mitochondrion                                | structural molecule activity;transporter activity                          | 7.859  | 4.456  | 0.57 |
| Q12233 | ATP synthase subunit g, mitochondrial [OS=Saccharomyces cerevisiae S288c]                                  | 856131 | ATP20; YPR020W         | cell organization and biogenesis;metabolic process;transport                                     | membrane;mitochondrion                                        | catalytic activity;transporter activity                                    | 1.371  | 0.778  | 0.57 |
| P36147 | Presequence translocated-associated motor subunit pam17, mitochondrial [OS=Saccharomyces cerevisiae S288c] | 853939 | PAM17; YKR065C         | transport                                                                                        | membrane;mitochondrion                                        |                                                                            | 1.371  | 0.778  | 0.57 |
| P33303 | Succinate/fumarate mitochondrial transporter [OS=Saccharomyces cerevisiae S288c]                           | 853558 | SFC1; YJR095W          | metabolic process;transport                                                                      | membrane;mitochondrion                                        | structural molecule activity;transporter activity                          | 15.681 | 9      | 0.57 |
| P00830 | ATP synthase subunit beta, mitochondrial [OS=Saccharomyces cerevisiae S288c]                               | 853585 | ATP2; YJR121W          | metabolic process;transport                                                                      | cytosol;membrane;mitochondrion                                | catalytic activity;nucleotide binding;protein binding;transporter activity | 41.987 | 24.119 | 0.57 |
| Q03713 | Respiratory supercomplex factor 1, mitochondrial [OS=Saccharomyces cerevisiae S288c]                       | 854978 | RCF1; YML030W          | cell organization and biogenesis                                                                 | membrane;mitochondrion                                        |                                                                            | 0.995  | 0.585  | 0.59 |
| P00890 | citrate synthase, mitochondrial [OS=Saccharomyces cerevisiae S288c]                                        | 855732 | CIT1; YNR001C          | metabolic process;transport                                                                      | cytosol;mitochondrion;organelle lumen                         | catalytic activity                                                         | 21.758 | 12.895 | 0.59 |
| P40008 | Protein FMP52, mitochondrial [OS=Saccharomyces cerevisiae S288c]                                           | 856721 | FMP52; YER004W         |                                                                                                  | endoplasmic reticulum;membrane;mitochondrion                  | catalytic activity                                                         | 1.738  | 1.054  | 0.61 |
| P53721 | Respiratory supercomplex factor 2, mitochondrial [OS=Saccharomyces cerevisiae S288c]                       | 855752 | RCF2; YNR018W          | cell organization and biogenesis                                                                 | membrane;mitochondrion                                        |                                                                            | 7.111  | 4.337  | 0.61 |
| P07253 | cytochrome B pre-mRNA-processing protein 6 [OS=Saccharomyces cerevisiae S288c]                             | 852417 | CBP6; YBR120C          | cell organization and biogenesis;metabolic process;regulation of biological process              | mitochondrion;ribosome                                        |                                                                            | 2.728  | 1.683  | 0.62 |
| P47045 | mitochondrial import inner membrane translocase subunit TIM54 [OS=Saccharomyces cerevisiae S288c]          | 853392 | TIM54; YJL054W         | cell organization and biogenesis;transport                                                       | cytosol;membrane;mitochondrion                                | transporter activity                                                       | 0.54   | 0.334  | 0.62 |
| P36534 | 54S ribosomal protein L40, mitochondrial [OS=Saccharomyces cerevisiae S288c]                               | 855930 | MRPL40; YPL173W        | cell organization and biogenesis;metabolic process                                               | mitochondrion;ribosome                                        | protein binding;structural molecule activity                               | 0.413  | 0.259  | 0.63 |
| P33759 | 37S ribosomal protein S5, mitochondrial [OS=Saccharomyces cerevisiae S288c]                                | 852553 | MRP55; YBR251W         | cell organization and biogenesis;metabolic process                                               | mitochondrion;ribosome                                        | RNA binding;structural molecule activity                                   | 0.413  | 0.259  | 0.63 |
| Q08179 | Mitochondrial distribution and morphology protein 38 [OS=Saccharomyces cerevisiae S288c]                   | 854130 | MDM38; YOL027C         | cell organization and biogenesis;cellular homeostasis;regulation of biological process;transport | membrane;mitochondrion                                        |                                                                            | 3.732  | 2.35   | 0.63 |
| P38152 | Tricarboxylate transport protein [OS=Saccharomyces cerevisiae S288c]                                       | 852594 | CTP1; YBR291C          | metabolic process;transport                                                                      | membrane;mitochondrion                                        | structural molecule activity;transporter activity                          | 0.389  | 0.245  | 0.63 |
| P39525 | 3-oxoacyl-[acyl-carrier-protein] synthase homolog [OS=Saccharomyces cerevisiae S288c]                      | 856790 | CEM1; YER061C          | metabolic process                                                                                | mitochondrion                                                 | catalytic activity                                                         | 0.369  | 0.233  | 0.63 |
| P38797 | Protein phosphatase 2C homolog 7, mitochondrial [OS=Saccharomyces cerevisiae S288c]                        | 856475 | PTC7; YHR076W          | metabolic process                                                                                | mitochondrion                                                 | catalytic activity;metal ion binding;protein binding                       | 0.369  | 0.233  | 0.63 |
| P40012 | protoporphyrinogen oxidase [OS=Saccharomyces cerevisiae S288c]                                             | 856733 | HEM14; YER014W         | metabolic process                                                                                | membrane;mitochondrion                                        | catalytic activity                                                         | 0.833  | 0.528  | 0.63 |
| P36101 | tRNA threonylcarbamoyladenine dehydratase 2 [OS=Saccharomyces cerevisiae S288c]                            | 853841 | TCD2; YKL027W; YKL027W | metabolic process                                                                                | cytosol;membrane;mitochondrion                                | catalytic activity;nucleotide binding                                      | 0.334  | 0.212  | 0.63 |
| Q04013 | Citrate/oxoglutarate carrier protein [OS=Saccharomyces cerevisiae S288c]                                   | 855282 | YHM2; YMR241W          | cell organization and biogenesis;metabolic process;transport                                     | membrane;mitochondrion                                        | DNA binding;structural molecule activity;transporter activity              | 4.012  | 2.548  | 0.64 |
| P40961 | prohibitin-1 [OS=Saccharomyces cerevisiae S288c]                                                           | 853033 | PHB1; YGR132C          | cell organization and biogenesis;metabolic process;regulation of biological process              | membrane;mitochondrion                                        | protein binding                                                            | 5.158  | 3.281  | 0.64 |
| P38077 | ATP synthase subunit gamma, mitochondrial [OS=Saccharomyces cerevisiae S288c]                              | 852327 | ATP3; YBR039W          | metabolic process;transport                                                                      | membrane;mitochondrion                                        | catalytic activity;transporter activity                                    | 15.876 | 10.103 | 0.64 |
| Q06510 | Lysophosphatidylcholine acyltransferase [OS=Saccharomyces cerevisiae S288c]                                | 856262 | TAZ1; YPR140W          | cell organization and biogenesis;metabolic process;transport                                     | membrane;mitochondrion                                        | catalytic activity                                                         | 0.304  | 0.194  | 0.64 |
| Q01574 | acetyl-coenzyme A synthetase 1 [OS=Saccharomyces cerevisiae S288c]                                         | 851245 | ACS1; YAL054C          | cell organization and biogenesis;metabolic process                                               | cytoplasm;cytosol;endoplasmic reticulum;mitochondrion;nucleus | catalytic activity;nucleotide binding                                      | 1.482  | 0.947  | 0.64 |

|        |                                                                                                                    |        |                  |                                                                                      |                                  |                                                                         |         |        |      |
|--------|--------------------------------------------------------------------------------------------------------------------|--------|------------------|--------------------------------------------------------------------------------------|----------------------------------|-------------------------------------------------------------------------|---------|--------|------|
| P36516 | 54S ribosomal protein L3, mitochondrial [OS=Saccharomyces cerevisiae S288c]                                        | 855039 | MRPL3; YMR024W   | cell organization and biogenesis;metabolic process;response to stimulus              | mitochondrion;nucleus;ribosome   | catalytic activity;RNA binding;structural molecule activity             | 0.269   | 0.172  | 0.64 |
| P25349 | Flavoprotein-like protein YCP4 [OS=Saccharomyces cerevisiae S288c]                                                 | 850360 | YCP4; YCR004C    | metabolic process;regulation of biological process                                   | cytoplasm;membrane;mitochondrion | catalytic activity;nucleotide binding;protein binding                   | 7.799   | 4.995  | 0.64 |
| Q12166 | 2-isopropylmalate synthase 2, mitochondrial [OS=Saccharomyces cerevisiae S288c]                                    | 854275 | LEU9; YOR108W    | metabolic process                                                                    | mitochondrion                    | catalytic activity;protein binding                                      | 1.707   | 1.11   | 0.65 |
| P36046 | Mitochondrial intermembrane space import and assembly protein 40 [OS=Saccharomyces cerevisiae S288c]               | 853639 | MIA40; YKL195W   | cellular component movement;metabolic process;response to stimulus;transport         | membrane;mitochondrion           | catalytic activity;protein binding;transporter activity                 | 0.817   | 0.532  | 0.65 |
| Q02776 | Mitochondrial import inner membrane translocase subunit TIM50 [OS=Saccharomyces cerevisiae S288c]                  | 856042 | TIM50; YPL063W   | cell organization and biogenesis;metabolic process;transport                         | membrane;mitochondrion           | catalytic activity;protein binding;transporter activity                 | 4.179   | 2.728  | 0.65 |
| P40098 | uncharacterized mitochondrial membrane protein FMP10 [OS=Saccharomyces cerevisiae S288c]                           | 856931 | FMP10; YER182W   |                                                                                      | membrane;mitochondrion           |                                                                         | 1.637   | 1.069  | 0.65 |
| P18239 | ADP,ATP carrier protein 2 [OS=Saccharomyces cerevisiae S288c]                                                      | 852250 | PET9; YBL030C    | cell death;metabolic process;transport                                               | membrane;mitochondrion           | structural molecule activity;transporter activity                       | 122.285 | 80.113 | 0.66 |
| P32795 | Mitochondrial inner membrane i-AAA protease supercomplex subunit YME1 [OS=Saccharomyces cerevisiae S288c]          | 856135 | YME1; YPRO24W    | metabolic process;response to stimulus;transport                                     | membrane;mitochondrion           | catalytic activity;metal ion binding;nucleotide binding;protein binding | 1.085   | 0.714  | 0.66 |
| Q12480 | Probable electron transfer flavoprotein subunit alpha, mitochondrial [OS=Saccharomyces cerevisiae S288c]           | 856112 | AIM45; YPR004C   | metabolic process;transport                                                          | mitochondrion;organelle lumen    | catalytic activity;nucleotide binding                                   | 1.512   | 0.995  | 0.66 |
| P39518 | Long-chain-fatty-acid-CoA ligase 2 [OS=Saccharomyces cerevisiae S288c]                                             | 856734 | FAA2; YER015W    | metabolic process;transport                                                          | cytoplasm;mitochondrion          | catalytic activity;nucleotide binding                                   | 0.802   | 0.535  | 0.67 |
| P53163 | 54S ribosomal protein L12, mitochondrial [OS=Saccharomyces cerevisiae S288c]                                       | 852811 | MNP1; YGL068W    | cell organization and biogenesis;metabolic process                                   | mitochondrion;ribosome           | RNA binding;structural molecule activity                                | 1.31    | 0.874  | 0.67 |
| Q12374 | Nuclear control of ATPase protein 2 [OS=Saccharomyces cerevisiae S288c]                                            | 856278 | NCA2; YPR155C    | metabolic process                                                                    | membrane;mitochondrion           |                                                                         | 0.565   | 0.377  | 0.67 |
| P32332 | Mitochondrial oxaloacetate transport protein [OS=Saccharomyces cerevisiae S288c]                                   | 853739 | OAC1; YKL120W    | metabolic process;transport                                                          | membrane;mitochondrion           | structural molecule activity;transporter activity                       | 2.162   | 1.448  | 0.67 |
| Q06236 | Mitochondrial inner membrane protein SHH4 [OS=Saccharomyces cerevisiae S288c]                                      | 850861 | SHH4; YLR164W    | metabolic process                                                                    | membrane;mitochondrion           | catalytic activity;metal ion binding                                    | 3.217   | 2.162  | 0.67 |
| P21560 | Protein CBP3, mitochondrial [OS=Saccharomyces cerevisiae S288c]                                                    | 855886 | CBP3; YPL215W    | cell organization and biogenesis;regulation of biological process                    | membrane;mitochondrion;ribosome  |                                                                         | 1.031   | 0.701  | 0.68 |
| P37298 | Succinate dehydrogenase [ubiquinone] cytochrome b small subunit, mitochondrial [OS=Saccharomyces cerevisiae S288c] | 851758 | SDH4; YDR178W    | metabolic process;transport                                                          | membrane;mitochondrion           | catalytic activity;metal ion binding                                    | 2.594   | 1.783  | 0.69 |
| P32904 | 54S ribosomal protein L6, mitochondrial [OS=Saccharomyces cerevisiae S288c]                                        | 856552 | MRPL6; YHR147C   | cell organization and biogenesis;metabolic process                                   | mitochondrion;ribosome           | RNA binding;structural molecule activity                                | 0.778   | 0.54   | 0.69 |
| P23833 | Protein SCO1, mitochondrial [OS=Saccharomyces cerevisiae S288c]                                                    | 852325 | SCO1; YBR037C    | cell organization and biogenesis;cellular homeostasis;response to stimulus;transport | membrane;mitochondrion           | antioxidant activity;catalytic activity;metal ion binding               | 0.668   | 0.468  | 0.70 |
| P53266 | Cytochrome oxidase assembly protein SHY1 [OS=Saccharomyces cerevisiae S288c]                                       | 853009 | SHY1; YGR112W    | cell organization and biogenesis                                                     | membrane;mitochondrion           | protein binding                                                         | 1.154   | 0.817  | 0.71 |
| Q12428 | Probable 2-methylcitrate dehydratase [OS=Saccharomyces cerevisiae S288c]                                           | 856108 | PDH1; YPR002W    | metabolic process                                                                    | cytoplasm;membrane;mitochondrion | catalytic activity                                                      | 7.058   | 5.043  | 0.71 |
| P36066 | Protein MRG3-like [OS=Saccharomyces cerevisiae S288c]                                                              | 853725 | YKL133C; YKL133C | metabolic process                                                                    | membrane;mitochondrion           | protein binding                                                         | 0.334   | 0.241  | 0.72 |
| P53326 | Uncharacterized protein YGR266W [OS=Saccharomyces cerevisiae S288c]                                                | 853182 | YGR266W; YGR266W |                                                                                      | membrane;mitochondrion           |                                                                         | 0.602   | 0.442  | 0.73 |
| P54003 | Protein SUR7 [OS=Saccharomyces cerevisiae S288c]                                                                   | 854953 | SUR7; YML052W    | cell differentiation;transport                                                       | membrane;mitochondrion           |                                                                         | 1.154   | 0.848  | 0.73 |
| Q08023 | Protein FMP25, mitochondrial [OS=Saccharomyces cerevisiae S288c]                                                   | 850766 | FMP25; YLR077W   | cell organization and biogenesis                                                     | membrane;mitochondrion           |                                                                         | 0.968   | 0.719  | 0.74 |
| P21801 | Succinate dehydrogenase [ubiquinone] iron-sulfur subunit, mitochondrial [OS=Saccharomyces                          | 850685 | SDH2; YLL041C    | metabolic process;transport                                                          | membrane;mitochondrion           | catalytic activity;metal ion binding                                    | 18.684  | 14.013 | 0.75 |

|        |                                                                                                              |        |                  |                                                                                                        |                                              |                                                                           |         |         |      |
|--------|--------------------------------------------------------------------------------------------------------------|--------|------------------|--------------------------------------------------------------------------------------------------------|----------------------------------------------|---------------------------------------------------------------------------|---------|---------|------|
|        | cerevisiae S288c]                                                                                            |        |                  |                                                                                                        |                                              |                                                                           |         |         |      |
| P40185 | Protein mfm1, mitochondrial [OS=Saccharomyces cerevisiae S288c]                                              | 854760 | MMF1; YIL051C    | cell organization and biogenesis;metabolic process                                                     | mitochondrion;organelle lumen                |                                                                           | 5.31    | 4.012   | 0.76 |
| P32799 | Cytochrome c oxidase subunit 6A, mitochondrial [OS=Saccharomyces cerevisiae S288c]                           | 852684 | COX13; YGL191W   | cell organization and biogenesis;metabolic process;regulation of biological process;transport          | membrane;mitochondrion                       | catalytic activity;enzyme regulator activity;transporter activity         | 5.31    | 4.012   | 0.76 |
| P50085 | Prohibitin-2 [OS=Saccharomyces cerevisiae S288c]                                                             | 853146 | PHB2; YGR231C    | cell organization and biogenesis;metabolic process;regulation of biological process                    | membrane;mitochondrion                       | protein binding                                                           | 4.337   | 3.329   | 0.77 |
| Q08968 | UPF0061 protein FMP40 [OS=Saccharomyces cerevisiae S288c]                                                    | 855879 | FMP40; YPL222W   |                                                                                                        | mitochondrion                                | protein binding                                                           | 0.917   | 0.823   | 0.90 |
| P07256 | Cytochrome b-c1 complex subunit 1, mitochondrial [OS=Saccharomyces cerevisiae S288c]                         | 852235 | COR1; YBL045C    | metabolic process;transport                                                                            | membrane;mitochondrion                       | catalytic activity;metal ion binding;protein binding;transporter activity | 9.89    | 9.89    | 1.00 |
| P50088 | Stationary phase gene 1 protein [OS=Saccharomyces cerevisiae S288c]                                          | 853151 | SPG1; YGR236C    |                                                                                                        | endoplasmic reticulum;membrane;mitochondrion |                                                                           | 157.489 | 157.489 | 1.00 |
| P00410 | Cytochrome c oxidase subunit 2 [OS=Saccharomyces cerevisiae S288c]                                           | 854622 | COX2; Q0250      | metabolic process;transport                                                                            | membrane;mitochondrion                       | catalytic activity;metal ion binding;protein binding;transporter activity | 2.831   | 2.831   | 1.00 |
| P38325 | Mitochondrial outer membrane protein OM14 [OS=Saccharomyces cerevisiae S288c]                                | 852531 | OM14; YBR230C    | transport                                                                                              | membrane;mitochondrion                       |                                                                           | 9       | 9       | 1.00 |
| P40508 | Uncharacterized protein YIL077C [OS=Saccharomyces cerevisiae S288c]                                          | 854733 | YIL077C; YIL077C |                                                                                                        | mitochondrion                                |                                                                           | 0.668   | 0.668   | 1.00 |
| P38072 | Protein SCO2, mitochondrial [OS=Saccharomyces cerevisiae S288c]                                              | 852312 | SCO2; YBR024W    | cell organization and biogenesis;cellular homeostasis;metabolic process;transport                      | membrane;mitochondrion                       | antioxidant activity;catalytic activity;metal ion binding                 | 0.73    | 0.73    | 1.00 |
| Q06892 | NADH kinase POSS, mitochondrial [OS=Saccharomyces cerevisiae S288c]                                          | 855913 | POSS; YPL188W    | metabolic process;response to stimulus                                                                 | mitochondrion;organelle lumen                | catalytic activity;nucleotide binding                                     | 0.369   | 0.369   | 1.00 |
| P38127 | mitochondrial carrier protein RIM2 [OS=Saccharomyces cerevisiae S288c]                                       | 852491 | RIM2; YBR192W    | cell organization and biogenesis;metabolic process;transport                                           | membrane;mitochondrion                       | structural molecule activity;transporter activity                         | 0.585   | 0.585   | 1.00 |
| P32445 | Single-stranded DNA-binding protein RIM1, mitochondrial [OS=Saccharomyces cerevisiae S288c]                  | 850395 | RIM1; YCR028C-A  | cell organization and biogenesis;metabolic process;regulation of biological process                    | mitochondrion                                | DNA binding                                                               | 1.154   | 1.154   | 1.00 |
| P32331 | Carrier protein YMC1, mitochondrial [OS=Saccharomyces cerevisiae S288c]                                      | 856171 | YMC1; YPR058W    | metabolic process;transport                                                                            | membrane;mitochondrion;vacuole               | structural molecule activity;transporter activity                         | 0.501   | 0.501   | 1.00 |
| Q12165 | ATP synthase subunit delta, mitochondrial [OS=Saccharomyces cerevisiae S288c]                                | 851560 | ATP16; YDL004W   | metabolic process;transport                                                                            | membrane;mitochondrion                       | catalytic activity;transporter activity                                   | 1.371   | 1.371   | 1.00 |
| P33421 | Succinate dehydrogenase [ubiquinone] cytochrome b subunit, mitochondrial [OS=Saccharomyces cerevisiae S288c] | 853716 | SDH3; YKL141W    | cell organization and biogenesis;metabolic process;transport                                           | membrane;mitochondrion                       | catalytic activity;metal ion binding                                      | 0.931   | 0.931   | 1.00 |
| Q06668 | Methyltransferase OMS1, mitochondrial [OS=Saccharomyces cerevisiae S288c]                                    | 851911 | OMS1; YDR316W    | metabolic process                                                                                      | membrane;mitochondrion                       | catalytic activity                                                        | 0.301   | 0.301   | 1.00 |
| P17695 | Glutaredoxin-2, mitochondrial [OS=Saccharomyces cerevisiae S288c]                                            | 852124 | GRX2; YDR513W    | cellular homeostasis;metabolic process;regulation of biological process;response to stimulus;transport | cytoplasm;cytosol;mitochondrion;nucl eus     | antioxidant activity;catalytic activity                                   | 0.52    | 0.52    | 1.00 |
| P34224 | Uncharacterized protein YBL059W [OS=Saccharomyces cerevisiae S288c]                                          | 852221 | YBL059W; YBL059W |                                                                                                        | membrane;mitochondrion                       |                                                                           | 0.468   | 0.468   | 1.00 |
| Q99297 | Mitochondrial 2-oxodicarboxylate carrier 2 [OS=Saccharomyces cerevisiae S288c]                               | 854397 | ODC2; YOR222W    | metabolic process;transport                                                                            | membrane;mitochondrion                       | structural molecule activity;transporter activity                         | 0.54    | 0.54    | 1.00 |
| Q08223 | Altered inheritance of mitochondria protein 39, mitochondrial [OS=Saccharomyces cerevisiae S288c]            | 854103 | AIM39; YOL053W   |                                                                                                        | cytosol;membrane;mitochondrion               |                                                                           | 0.259   | 0.259   | 1.00 |
| P32266 | Dynammin-like GTPase MGM1, mitochondrial [OS=Saccharomyces cerevisiae S288c]                                 | 854386 | MGM1; YOR211C    | cell organization and biogenesis                                                                       | membrane;mitochondrion                       | catalytic activity;nucleotide binding;protein binding                     | 0.086   | 0.086   | 1.00 |
| P19516 | Cytochrome c oxidase assembly protein COX11, mitochondrial [OS=Saccharomyces cerevisiae S288c]               | 855971 | COX11; YPL132W   | cell organization and biogenesis;metabolic process                                                     | membrane;mitochondrion;ribosome              | metal ion binding                                                         | 0.274   | 0.274   | 1.00 |

|        |                                                                                                    |        |                       |                                                                                                                    |                                                 |                                                                   |       |       |      |
|--------|----------------------------------------------------------------------------------------------------|--------|-----------------------|--------------------------------------------------------------------------------------------------------------------|-------------------------------------------------|-------------------------------------------------------------------|-------|-------|------|
| P18496 | Mitochondrial ATPase complex subunit ATP10 [OS=Saccharomyces cerevisiae S288c]                     | 851109 | ATP10; YLR393W        | cell organization and biogenesis                                                                                   | cytoplasm;membrane;mitochondrion                | protein binding                                                   | 0.413 | 0.413 | 1.00 |
| P28737 | Protein MSP1 [OS=Saccharomyces cerevisiae S288c]                                                   | 852915 | MSP1; YGR028W         | cell organization and biogenesis;metabolic process;regulation of biological process;response to stimulus;transport | membrane;mitochondrion;nucleus                  | catalytic activity;nucleotide binding;protein binding;RNA binding | 0.413 | 0.413 | 1.00 |
| P00127 | Cytochrome b-c1 complex subunit 6 [OS=Saccharomyces cerevisiae S288c]                              | 850593 | QCR6; YFR033C         | metabolic process;transport                                                                                        | membrane;mitochondrion                          | catalytic activity;transporter activity                           | 0.334 | 0.334 | 1.00 |
| P43594 | MICOS complex subunit MIC19 [OS=Saccharomyces cerevisiae S288c]                                    | 850563 | AIM13; MIC19; YFR011C | cell organization and biogenesis                                                                                   | cytoplasm;membrane;mitochondrion                |                                                                   | 0.52  | 0.52  | 1.00 |
| P36528 | 54S ribosomal protein L17, mitochondrial [OS=Saccharomyces cerevisiae S288c]                       | 855469 | MRPL17; YNL252C       | cell organization and biogenesis;metabolic process                                                                 | mitochondrion;ribosome                          | structural molecule activity                                      | 0.11  | 0.11  | 1.00 |
| P81450 | ATP synthase subunit J, mitochondrial [OS=Saccharomyces cerevisiae S288c]                          | 854893 | ATP18; YML081C-A      | cell organization and biogenesis;metabolic process;transport                                                       | membrane;mitochondrion                          | catalytic activity;transporter activity                           | 2.162 | 2.162 | 1.00 |
| Q3E6R5 | uncharacterized mitochondrial outer membrane protein YDR381C-A [OS=Saccharomyces cerevisiae S288c] | 851989 | YDR381C-A; YDR381C-A  |                                                                                                                    | membrane;mitochondrion                          |                                                                   | 0.389 | 0.389 | 1.00 |
| P32463 | Acyl carrier protein, mitochondrial [OS=Saccharomyces cerevisiae S288c]                            | 853642 | ACP1; YKL192C         | metabolic process;transport                                                                                        | mitochondrion                                   |                                                                   | 0.259 | 0.259 | 1.00 |
| P54857 | lipase 2 [OS=Saccharomyces cerevisiae S288c]                                                       | 851628 | TGL2; YDR058C         | metabolic process;transport                                                                                        | mitochondrion                                   | catalytic activity                                                | 0.233 | 0.233 | 1.00 |
| Q05779 | Ubiquinone biosynthesis protein COQ9, mitochondrial [OS=Saccharomyces cerevisiae S288c]            | 850898 | COQ9; YLR201C         | metabolic process                                                                                                  | membrane;mitochondrion                          |                                                                   | 0.166 | 0.166 | 1.00 |
| P47150 | 37S ribosomal protein S7, mitochondrial [OS=Saccharomyces cerevisiae S288c]                        | 853578 | RSM7; YJR113C         | cell organization and biogenesis;metabolic process                                                                 | mitochondrion;ribosome                          | RNA binding;structural molecule activity                          | 0.101 | 0.101 | 1.00 |
| P87275 | Altered inheritance of mitochondria protein 11 [OS=Saccharomyces cerevisiae S288c]                 | 856829 | AIM11; YER093C-A      |                                                                                                                    | membrane;mitochondrion                          |                                                                   | 0.389 | 0.389 | 1.00 |
| P22289 | cytochrome b-c1 complex subunit 9 [OS=Saccharomyces cerevisiae S288c]                              | 853095 | QCR9; YGR183C         | cell organization and biogenesis;metabolic process;transport                                                       | membrane;mitochondrion                          | catalytic activity;transporter activity                           | 1.154 | 1.154 | 1.00 |
| P25038 | Translation initiation factor IF-2, mitochondrial [OS=Saccharomyces cerevisiae S288c]              | 854135 | IFM1; YOL023W         | cell organization and biogenesis;metabolic process                                                                 | mitochondrion;nucleus                           | catalytic activity;nucleotide binding;RNA binding                 | 0.054 | 0.054 | 1.00 |
| Q06630 | Mitochondrial homologous recombination protein 1 [OS=Saccharomyces cerevisiae S288c]               | 851890 | MHR1; YDR296W         | cell organization and biogenesis;metabolic process;regulation of biological process;response to stimulus           | mitochondrion;nucleus                           | catalytic activity;DNA binding;structural molecule activity       | 0.166 | 0.166 | 1.00 |
| P00045 | Cytochrome c iso-2 [OS=Saccharomyces cerevisiae S288c]                                             | 856672 | CYC7; YEL039C         | metabolic process;transport                                                                                        | mitochondrion                                   | metal ion binding                                                 | 0.259 | 0.259 | 1.00 |
| P04039 | Cytochrome c oxidase polypeptide VIII, mitochondrial [OS=Saccharomyces cerevisiae S288c]           | 851111 | COX8; YLR395C         | metabolic process;transport                                                                                        | membrane;mitochondrion                          | catalytic activity;transporter activity                           | 0.778 | 0.778 | 1.00 |
| P40581 | peroxiredoxin HYR1 [OS=Saccharomyces cerevisiae S288c]                                             | 854855 | HYR1; YIR037W         | metabolic process;response to stimulus                                                                             | cytoplasm;cytosol;mitochondrion;organelle lumen | antioxidant activity;catalytic activity                           | 0.259 | 0.259 | 1.00 |
| P07236 | Threonine--tRNA ligase, mitochondrial [OS=Saccharomyces cerevisiae S288c]                          | 853640 | MST1; YKL194C         | metabolic process                                                                                                  | cytoplasm;mitochondrion;organelle lumen         | catalytic activity;nucleotide binding;RNA binding                 | 0.072 | 0.072 | 1.00 |
| P40086 | Cytochrome c oxidase assembly protein cox15 [OS=Saccharomyces cerevisiae S288c]                    | 856884 | COX15; YER141W        | cell organization and biogenesis;metabolic process;transport                                                       | membrane;mitochondrion                          | catalytic activity;transporter activity                           | 0.668 | 0.817 | 1.22 |
| Q12289 | mitochondrial carnitine carrier [OS=Saccharomyces cerevisiae S288c]                                | 854267 | CRC1; YOR100C         | metabolic process;transport                                                                                        | membrane;mitochondrion                          | structural molecule activity;transporter activity                 | 0.931 | 1.154 | 1.24 |
| P38523 | GrpE protein homolog, mitochondrial [OS=Saccharomyces cerevisiae S288c]                            | 854407 | MGE1; YOR232W         | metabolic process;regulation of biological process;transport                                                       | membrane;mitochondrion;organelle lumen          | enzyme regulator activity;nucleotide binding;protein binding      | 0.624 | 0.833 | 1.33 |
| Q04935 | Cytochrome c oxidase protein 20, mitochondrial [OS=Saccharomyces cerevisiae S288c]                 | 851817 | COX20; YDR231C        | cell organization and biogenesis;metabolic process                                                                 | membrane;mitochondrion                          | protein binding                                                   | 1.031 | 1.424 | 1.38 |
| P27697 | Atypical kinase COQ8, mitochondrial [OS=Saccharomyces cerevisiae S288c]                            | 852758 | COQ8; YGL119W         | metabolic process                                                                                                  | membrane;mitochondrion;organelle lumen          | catalytic activity;nucleotide binding                             | 0.133 | 0.205 | 1.54 |
| P40496 | 37S ribosomal protein S25, mitochondrial [OS=Saccharomyces cerevisiae S288c]                       | 854715 | RSM25; YIL093C        | cell organization and biogenesis;metabolic process                                                                 | mitochondrion;ribosome                          | structural molecule activity                                      | 0.292 | 0.468 | 1.60 |
| Q06089 | Uncharacterized mitochondrial outer membrane protein YPR098C [OS=Saccharomyces cerevisiae S288c]   | 856213 | YPR098C; YPR098       |                                                                                                                    | membrane;mitochondrion                          |                                                                   | 4.623 | 9     | 1.95 |



|        |                                                                                                   |        |                 |                                                                                      |                               |                                                           |       |       |      |
|--------|---------------------------------------------------------------------------------------------------|--------|-----------------|--------------------------------------------------------------------------------------|-------------------------------|-----------------------------------------------------------|-------|-------|------|
|        | S288c]                                                                                            |        | C               |                                                                                      |                               |                                                           |       |       |      |
| P21771 | 37S ribosomal protein S28, mitochondrial [OS=Saccharomyces cerevisiae S288c]                      | 851937 | MRPS28; YDR337W | cell organization and biogenesis;metabolic process                                   | mitochondrion;ribosome        | RNA binding;structural molecule activity                  | 0.129 | 0.274 | 2.12 |
| P32378 | 4-hydroxybenzoate polyprenyltransferase, mitochondrial [OS=Saccharomyces cerevisiae S288c]        | 855778 | COQ2; YNR041C   | metabolic process;transport                                                          | membrane;mitochondrion        | catalytic activity                                        | 0.136 | 0.292 | 2.15 |
| P42847 | 37S ribosomal protein S18, mitochondrial [OS=Saccharomyces cerevisiae S288c]                      | 855410 | MRPS18; YNL306W | cell organization and biogenesis;metabolic process                                   | mitochondrion;ribosome        | RNA binding;structural molecule activity                  | 0.155 | 0.334 | 2.15 |
| Q08970 | Mitochondrial metal transporter 2 [OS=Saccharomyces cerevisiae S288c]                             | 855877 | MMT2; YPL224C   | cellular homeostasis;regulation of biological process;response to stimulus;transport | membrane;mitochondrion        | transporter activity                                      | 0.186 | 0.407 | 2.19 |
| P42949 | Mitochondrial import inner membrane translocase subunit TIM16 [OS=Saccharomyces cerevisiae S288c] | 853340 | PAM16; YJL104W  | transport                                                                            | membrane;mitochondrion        | protein binding                                           | 0.233 | 0.52  | 2.23 |
| P46998 | mitochondrial membrane protein FMP33 [OS=Saccharomyces cerevisiae S288c]                          | 853279 | FMP33; YJL161W  |                                                                                      | membrane;mitochondrion        |                                                           | 0.334 | 0.778 | 2.33 |
| Q12032 | Altered inheritance of mitochondria protein 41, mitochondrial [OS=Saccharomyces cerevisiae S288c] | 854390 | AIM41; YOR215C  |                                                                                      | mitochondrion                 | catalytic activity                                        | 0.468 | 1.154 | 2.47 |
| P00447 | Superoxide dismutase [Mn], mitochondrial [OS=Saccharomyces cerevisiae S288c]                      | 856399 | SOD2; YHR008C   | metabolic process;response to stimulus                                               | mitochondrion;organelle lumen | antioxidant activity;catalytic activity;metal ion binding | 1.894 | 4.878 | 2.58 |

**Supplemental Table S8. The relative concentrations of proteins in mitochondria purified from *ups1Δ* cells cultured with or without LCA.** Mitochondria were purified from *ups1Δ* cells recovered on day 4 of cell culturing with or without LCA. Mass spectrometry-based identification and quantitation of proteins recovered in purified mitochondria were performed as described in Materials and methods. The exponentially modified protein abundance index (emPAI) provided by the "Proteome Discoverer" software was used to calculate the relative abundance of mitochondrial proteins between specified datasets. Data on the relative concentrations of mitochondrial proteins are presented as means of 2 independent experiments.

| Accession | Description                                                                                                | Entrez Gene ID | Gene ID          | Biological Process                                          | Cellular Component                        | Molecular Function                                                             | emPAI <i>ups1</i> | emPAI <i>ups1</i> + LCA | Ratio <i>ups1</i> + LCA / <i>ups1</i> |
|-----------|------------------------------------------------------------------------------------------------------------|----------------|------------------|-------------------------------------------------------------|-------------------------------------------|--------------------------------------------------------------------------------|-------------------|-------------------------|---------------------------------------|
| P50088    | Stationary phase gene 1 protein                                                                            | 853151         | SPG1             |                                                             | membrane; mitochondrion                   |                                                                                | 157.489           | 38.811                  | 0.25                                  |
| P21771    | 37S ribosomal protein S28, mitochondrial                                                                   | 851937         | MRPS28           | cell organization and biogenesis; metabolic process         | mitochondrion; ribosome                   | RNA binding; structural molecule activity                                      | 0.438             | 0.129                   | 0.29                                  |
| Q2V2P9    | Uncharacterized protein YDR119W-A [OS=Saccharomyces cerevisiae S288c]                                      | 3799970        | COX26; YDR119W-A |                                                             | membrane; mitochondrion                   |                                                                                | 3.642             | 1.154                   | 0.32                                  |
| P32387    | 54S ribosomal protein L41, mitochondrial [OS=Saccharomyces cerevisiae S288c]                               | 852014         | MRP20; YDR405W   | cell organization and biogenesis; metabolic process         | mitochondrion; ribosome                   | nucleotide binding; protein binding; RNA binding; structural molecule activity | 0.968             | 0.311                   | 0.32                                  |
| Q08245    | protein ZEO1 [OS=Saccharomyces cerevisiae S288c]                                                           | 854040         | ZEO1; YOL109W    | cell organization and biogenesis                            | membrane; mitochondrion                   | protein binding                                                                | 11.589            | 4.012                   | 0.35                                  |
| P00424    | Cytochrome c oxidase polypeptide 5A, mitochondrial [OS=Saccharomyces cerevisiae S288c]                     | 855675         | COX5A; YNL052W   | metabolic process; transport                                | membrane; mitochondrion                   | catalytic activity; transporter activity                                       | 2.511             | 0.874                   | 0.35                                  |
| P00044    | Cytochrome c iso-1 [OS=Saccharomyces cerevisiae S288c]                                                     | 853507         | CYC1; YJR048W    | metabolic process; transport                                | mitochondrion                             | metal ion binding; protein binding                                             | 9                 | 3.217                   | 0.36                                  |
| Q06485    | Autophagy-related protein 33 [OS=Saccharomyces cerevisiae S288c]                                           | 851070         | ATG33; YLR356W   | cell communication; metabolic process; response to stimulus | membrane; mitochondrion                   |                                                                                | 2.162             | 0.778                   | 0.36                                  |
| P49334    | Mitochondrial import receptor subunit tom22 [OS=Saccharomyces cerevisiae S288c]                            | 855592         | TOM22; YNL131W   | cell organization and biogenesis; transport                 | membrane; mitochondrion                   | protein binding; transporter activity                                          | 1.783             | 0.668                   | 0.37                                  |
| Q12359    | Ammonia transport outward protein 3 [OS=Saccharomyces cerevisiae S288c]                                    | 851992         | ATO3; YDR384C    | transport                                                   | membrane; mitochondrion                   | transporter activity                                                           | 1.512             | 0.585                   | 0.39                                  |
| P01097    | ATPase inhibitor, mitochondrial [OS=Saccharomyces cerevisiae S288c]                                        | 851347         | INH1; YDL181W    | metabolic process; regulation of biological process         | mitochondrion                             | catalytic activity; enzyme regulator activity; protein binding                 | 1.154             | 0.468                   | 0.41                                  |
| Q07914    | mitochondrial import inner membrane translocase subunit TIM14 [OS=Saccharomyces cerevisiae S288c]          | 850694         | PAM18; YLR008C   | regulation of biological process; transport                 | membrane; mitochondrion                   | enzyme regulator activity; protein binding; transporter activity               | 0.778             | 0.334                   | 0.43                                  |
| P36147    | Presequence translocated-associated motor subunit pam17, mitochondrial [OS=Saccharomyces cerevisiae S288c] | 853939         | PAM17; YKR065C   | transport                                                   | membrane; mitochondrion                   |                                                                                | 0.778             | 0.334                   | 0.43                                  |
| P33759    | 37S ribosomal protein S5, mitochondrial [OS=Saccharomyces cerevisiae S288c]                                | 852553         | MRPS5; YBR251W   | cell organization and biogenesis; metabolic process         | mitochondrion; ribosome                   | RNA binding; structural molecule activity                                      | 0.585             | 0.259                   | 0.44                                  |
| P51998    | 54S ribosomal protein yml6, mitochondrial [OS=Saccharomyces cerevisiae S288c]                              | 854983         | YML6; YML025C    | cell organization and biogenesis; metabolic process         | mitochondrion; ribosome                   | RNA binding; structural molecule activity                                      | 0.551             | 0.245                   | 0.44                                  |
| P36141    | Putative redox protein fmp46, mitochondrial [OS=Saccharomyces cerevisiae S288c]                            | 853923         | FMP46; YKR049C   | metabolic process                                           | mitochondrion                             | catalytic activity; protein binding                                            | 0.52              | 0.233                   | 0.45                                  |
| P22354    | 54S ribosomal protein L20, mitochondrial [OS=Saccharomyces cerevisiae S288c]                               | 853960         | MRPL20; YKR085C  | cell organization and biogenesis; metabolic process         | mitochondrion; ribosome                   | structural molecule activity                                                   | 0.389             | 0.179                   | 0.46                                  |
| P25613    | Accumulation of dyads protein 2 [OS=Saccharomyces cerevisiae S288c]                                        | 850368         | ADY2; YCR010C    | transport                                                   | membrane; mitochondrion; vacuole          | transporter activity                                                           | 9                 | 4.179                   | 0.46                                  |
| P04803    | Tryptophan--tRNA ligase, mitochondrial [OS=Saccharomyces cerevisiae S288c]                                 | 851861         | MSW1; YDR268W    | metabolic process                                           | cytoplasm; mitochondrion; organelle lumen | catalytic activity; nucleotide binding                                         | 0.292             | 0.136                   | 0.47                                  |

|        |                                                                                                                                               |         |                      |                                                                                                                               |                                                      |                                                                                        |        |        |      |
|--------|-----------------------------------------------------------------------------------------------------------------------------------------------|---------|----------------------|-------------------------------------------------------------------------------------------------------------------------------|------------------------------------------------------|----------------------------------------------------------------------------------------|--------|--------|------|
|        | S288c]                                                                                                                                        |         |                      |                                                                                                                               |                                                      |                                                                                        |        |        |      |
| P53220 | Mitochondrial import inner membrane translocase subunit TIM21 [OS=Saccharomyces cerevisiae S288c]                                             | 852921  | TIM21; YGR033C       | cell organization and biogenesis;transport                                                                                    | membrane;mitochondrion                               | protein binding                                                                        | 0.311  | 0.145  | 0.47 |
| P48569 | Uncharacterized protein YDL183C [OS=Saccharomyces cerevisiae S288c]                                                                           | 851345  | YDL183C ; YDL183C    | transport                                                                                                                     |                                                      |                                                                                        | 0.274  | 0.129  | 0.47 |
| P48527 | Tyrosine--tRNA ligase, mitochondrial [OS=Saccharomyces cerevisiae S288c]                                                                      | 856007  | MSY1; YPL097W        | metabolic process                                                                                                             | cytoplasm;cytosol;mitochondrion;organelle lumen      | catalytic activity;nucleotide binding;RNA binding                                      | 0.15   | 0.072  | 0.48 |
| Q02863 | ubiquitin carboxyl-terminal hydrolase 16 [OS=Saccharomyces cerevisiae S288c]                                                                  | 856032  | UBP16; YPL072W       | metabolic process                                                                                                             | membrane;mitochondrion                               | catalytic activity                                                                     | 0.15   | 0.072  | 0.48 |
| Q04172 | Sensitive to high expression protein 9, mitochondrial [OS=Saccharomyces cerevisiae S288c]                                                     | 852002  | SHE9; YDR393W        | cell organization and biogenesis                                                                                              | membrane;mitochondrion                               |                                                                                        | 0.172  | 0.083  | 0.48 |
| P33303 | Succinate/fumarate mitochondrial transporter [OS=Saccharomyces cerevisiae S288c]                                                              | 853558  | SFC1; YJR095W        | metabolic process;transport                                                                                                   | membrane;mitochondrion                               | structural molecule activity;transporter activity                                      | 13.678 | 6.743  | 0.49 |
| P09624 | Dihydropolypol dehydrogenase, mitochondrial [OS=Saccharomyces cerevisiae S288c]                                                               | 850527  | LPD1; YFL018C        | cellular homeostasis;metabolic process;regulation of biological process                                                       | mitochondrion;organelle lumen                        | catalytic activity;nucleotide binding                                                  | 43.367 | 21.539 | 0.50 |
| P00360 | glyceraldehyde-3-phosphate dehydrogenase 1 [OS=Saccharomyces cerevisiae S288c]                                                                | 853395  | TDH1; YJL052W        | metabolic process                                                                                                             | cytoplasm;cytosol;membrane;mitochondrion             | catalytic activity;nucleotide binding                                                  | 2.008  | 1.015  | 0.51 |
| P28737 | Protein MSP1 [OS=Saccharomyces cerevisiae S288c]                                                                                              | 852915  | MSP1; YGR028W        | cell organization and biogenesis;metabolic process;regulation of biological process;response to stimulus;transport            | membrane;mitochondrion;nucleus                       | catalytic activity;nucleotide binding;protein binding;RNA binding                      | 0.778  | 0.413  | 0.53 |
| P38072 | Protein SCO2, mitochondrial [OS=Saccharomyces cerevisiae S288c]                                                                               | 852312  | SCO2; YBR024W        | cell organization and biogenesis;cellular homeostasis;metabolic process;transport                                             | membrane;mitochondrion                               | antioxidant activity;catalytic activity;metal ion binding                              | 0.73   | 0.389  | 0.53 |
| P39525 | 3-oxoacyl-[acyl-carrier-protein] synthase homolog [OS=Saccharomyces cerevisiae S288c]                                                         | 856790  | CEM1; YER061C        | metabolic process                                                                                                             | mitochondrion                                        | catalytic activity                                                                     | 0.688  | 0.369  | 0.54 |
| P12695 | Dihydropolypolylsine-residue acetyltransferase component of pyruvate dehydrogenase complex, mitochondrial [OS=Saccharomyces cerevisiae S288c] | 855653  | LAT1; YNL071W        | metabolic process                                                                                                             | mitochondrion;organelle lumen                        | catalytic activity                                                                     | 9      | 4.946  | 0.55 |
| P40582 | Glutathione S-transferase 1 [OS=Saccharomyces cerevisiae S288c]                                                                               | 854856  | GTT1; YIR038C        | metabolic process                                                                                                             | endoplasmic reticulum;membrane;mitochondrion;nucleus | antioxidant activity;catalytic activity;protein binding;RNA binding                    | 1.683  | 0.931  | 0.55 |
| P12709 | glucose-6-phosphate isomerase [OS=Saccharomyces cerevisiae S288c]                                                                             | 852495  | PGI1; YBR196C        | metabolic process                                                                                                             | cytoplasm;membrane;mitochondrion                     | catalytic activity                                                                     | 0.468  | 0.259  | 0.55 |
| P40185 | Protein mmf1, mitochondrial [OS=Saccharomyces cerevisiae S288c]                                                                               | 854760  | MMF1; YIL051C        | cell organization and biogenesis;metabolic process                                                                            | mitochondrion;organelle lumen                        |                                                                                        | 5.31   | 2.981  | 0.56 |
| P10662 | 37S ribosomal protein MRP1, mitochondrial [OS=Saccharomyces cerevisiae S288c]                                                                 | 851948  | MRP1; YDR347W        | cell organization and biogenesis;metabolic process;response to stimulus                                                       | mitochondrion;ribosome                               | antioxidant activity;catalytic activity;metal ion binding;structural molecule activity | 0.995  | 0.585  | 0.59 |
| Q03713 | Respiratory supercomplex factor 1, mitochondrial [OS=Saccharomyces cerevisiae S288c]                                                          | 854978  | RCF1; YML030W        | cell organization and biogenesis                                                                                              | membrane;mitochondrion                               |                                                                                        | 0.995  | 0.585  | 0.59 |
| Q3E824 | Uncharacterized protein YOR020W-A [OS=Saccharomyces cerevisiae S288c]                                                                         | 1466480 | YOR020W-A; YOR020W-A | metabolic process;transport                                                                                                   | membrane;mitochondrion                               |                                                                                        | 3.642  | 2.162  | 0.59 |
| P00445 | Superoxide dismutase [Cu-Zn] [OS=Saccharomyces cerevisiae S288c]                                                                              | 853568  | SOD1; YJR104C        | cell organization and biogenesis;cellular homeostasis;metabolic process;regulation of biological process;response to stimulus | cytoplasm;cytosol;mitochondrion;nucleus              | antioxidant activity;catalytic activity;metal ion binding;protein binding              | 0.874  | 0.52   | 0.59 |
| P00950 | Phosphoglycerate mutase 1 [OS=Saccharomyces cerevisiae S288c]                                                                                 | 853705  | GPM1; YKL152C        | metabolic process;regulation of biological process                                                                            | cytoplasm;cytosol;membrane;mitochondrion             | catalytic activity                                                                     | 1.929  | 1.154  | 0.60 |
| P00942 | Triosephosphate isomerase [OS=Saccharomyces cerevisiae S288c]                                                                                 | 851620  | TPI1; YDR050C        | metabolic process                                                                                                             | cytoplasm;cytosol;membrane;mitochondrion             | catalytic activity                                                                     | 0.701  | 0.425  | 0.61 |

|        |                                                                                                              |        |                   |                                                                                                                                                            |                                                  |                                                             |        |        |      |
|--------|--------------------------------------------------------------------------------------------------------------|--------|-------------------|------------------------------------------------------------------------------------------------------------------------------------------------------------|--------------------------------------------------|-------------------------------------------------------------|--------|--------|------|
| P33421 | Succinate dehydrogenase [ubiquinone] cytochrome b subunit, mitochondrial [OS=Saccharomyces cerevisiae S288c] | 853716 | SDH3; YKL141W     | cell organization and biogenesis;metabolic process;transport                                                                                               | membrane;mitochondrion                           | catalytic activity;metal ion binding                        | 0.638  | 0.389  | 0.61 |
| P40364 | Mitochondrial peculiar membrane protein 1 [OS=Saccharomyces cerevisiae S288c]                                | 853379 | MPM1; YJL066C     |                                                                                                                                                            | membrane;mitochondrion                           |                                                             | 0.585  | 0.359  | 0.61 |
| P41735 | 5-demethoxyubiquinone hydroxylase, mitochondrial [OS=Saccharomyces cerevisiae S288c]                         | 854292 | CAT5; YOR125C     | metabolic process                                                                                                                                          | membrane;mitochondrion                           | catalytic activity;metal ion binding                        | 0.54   | 0.334  | 0.62 |
| P42847 | 37S ribosomal protein S18, mitochondrial [OS=Saccharomyces cerevisiae S288c]                                 | 855410 | MRPS18 ; YNL306W  | cell organization and biogenesis;metabolic process                                                                                                         | mitochondrion;ribosome                           | RNA binding;structural molecule activity                    | 0.54   | 0.334  | 0.62 |
| Q04599 | 54S ribosomal protein L1, mitochondrial [OS=Saccharomyces cerevisiae S288c]                                  | 851694 | MRPL1; YDR116C    | cell organization and biogenesis;metabolic process                                                                                                         | mitochondrion;ribosome                           | RNA binding;structural molecule activity                    | 0.438  | 0.274  | 0.63 |
| Q12251 | Uncharacterized mitochondrial carrier YPR011C [OS=Saccharomyces cerevisiae S288c]                            | 856121 | YPR011C ; YPR011C | metabolic process;transport                                                                                                                                | membrane;mitochondrion                           | structural molecule activity;transporter activity           | 0.389  | 0.245  | 0.63 |
| P12687 | 54S ribosomal protein L2, mitochondrial [OS=Saccharomyces cerevisiae S288c]                                  | 855727 | MRP7; YNL005C     | cell organization and biogenesis;metabolic process                                                                                                         | mitochondrion;ribosome                           | catalytic activity;RNA binding;structural molecule activity | 0.369  | 0.233  | 0.63 |
| P00925 | Enolase 2 [OS=Saccharomyces cerevisiae S288c]                                                                | 856579 | ENO2; YHR174W     | metabolic process;regulation of biological process                                                                                                         | cytoplasm;cytosol;membrane;mitochondrion;vacuole | catalytic activity;metal ion binding;protein binding        | 1.395  | 0.887  | 0.64 |
| P15108 | ATP-dependent molecular chaperone HSC82 [OS=Saccharomyces cerevisiae S288c]                                  | 855224 | HSC82; YMR186W    | cell organization and biogenesis;metabolic process;response to stimulus                                                                                    | cytoplasm;membrane;mitochondrion                 | catalytic activity;nucleotide binding;protein binding       | 1.081  | 0.688  | 0.64 |
| P39006 | Phosphatidylserine decarboxylase proenzyme 1, mitochondrial [OS=Saccharomyces cerevisiae S288c]              | 855552 | PSD1; YNL169C     | metabolic process;regulation of biological process                                                                                                         | membrane;mitochondrion                           | catalytic activity                                          | 0.269  | 0.172  | 0.64 |
| P38969 | Pentamidine resistance factor, mitochondrial [OS=Saccharomyces cerevisiae S288c]                             | 854440 | PNT1; YOR266W     | cell organization and biogenesis;response to stimulus                                                                                                      | membrane;mitochondrion                           |                                                             | 0.259  | 0.166  | 0.64 |
| P04807 | Hexokinase-2 [OS=Saccharomyces cerevisiae S288c]                                                             | 852639 | HXK2; YGL253W     | cell communication;cell organization and biogenesis;cellular homeostasis;metabolic process;regulation of biological process;response to stimulus;transport | cytosol;mitochondrion;nucleus                    | catalytic activity;nucleotide binding                       | 0.259  | 0.166  | 0.64 |
| P25087 | Sterol 24-C-methyltransferase [OS=Saccharomyces cerevisiae S288c]                                            | 855003 | ERG6; YML008C     | metabolic process                                                                                                                                          | endoplasmic reticulum;membrane;mitochondrion     | catalytic activity                                          | 1.894  | 1.219  | 0.64 |
| P16451 | Pyruvate dehydrogenase complex protein X component, mitochondrial [OS=Saccharomyces cerevisiae S288c]        | 853107 | PDX1; YGR193C     | metabolic process                                                                                                                                          | mitochondrion;organelle lumen                    | catalytic activity;structural molecule activity             | 2.03   | 1.346  | 0.66 |
| P07251 | ATP synthase subunit alpha, mitochondrial [OS=Saccharomyces cerevisiae S288c]                                | 852177 | ATP1; YBL099W     | metabolic process;transport                                                                                                                                | cytosol;membrane;mitochondrion                   | catalytic activity;nucleotide binding;transporter activity  | 37.312 | 25.102 | 0.67 |
| P00358 | glyceraldehyde-3-phosphate dehydrogenase 2 [OS=Saccharomyces cerevisiae S288c]                               | 853465 | TDH2; YJR009C     | cell death;metabolic process                                                                                                                               | cytoplasm;cytosol;membrane;mitochondrion;nucleus | catalytic activity;nucleotide binding;protein binding       | 3.962  | 2.675  | 0.68 |
| P38088 | Glycine--tRNA ligase 1, mitochondrial [OS=Saccharomyces cerevisiae S288c]                                    |        |                   | metabolic process                                                                                                                                          | cytoplasm;mitochondrion;organelle lumen          | catalytic activity;nucleotide binding;protein binding       | 0.399  | 0.271  | 0.68 |
| P07143 | Cytochrome c1, heme protein, mitochondrial [OS=Saccharomyces cerevisiae S288c]                               | 854231 | CYT1; YOR065W     | metabolic process;transport                                                                                                                                | cytosol;membrane;mitochondrion                   | metal ion binding                                           | 19.309 | 13.251 | 0.69 |
| P08417 | fumarate hydratase, mitochondrial [OS=Saccharomyces cerevisiae S288c]                                        | 855866 | FUM1; YPL262W     | cell organization and biogenesis;metabolic process                                                                                                         | cytoplasm;cytosol;mitochondrion;organelle lumen  | catalytic activity                                          | 6.88   | 4.736  | 0.69 |
| P52893 | probable alanine aminotransferase, mitochondrial [OS=Saccharomyces cerevisiae S288c]                         | 850778 | ALT1; YLR089C     | metabolic process                                                                                                                                          | mitochondrion;organelle lumen                    | catalytic activity                                          | 0.812  | 0.562  | 0.69 |

|        |                                                                                               |        |                       |                                                                                                                           |                                                  |                                                               |         |        |      |
|--------|-----------------------------------------------------------------------------------------------|--------|-----------------------|---------------------------------------------------------------------------------------------------------------------------|--------------------------------------------------|---------------------------------------------------------------|---------|--------|------|
| P38891 | Branched-chain-amino-acid aminotransferase, mitochondrial [OS=Saccharomyces cerevisiae S288c] | 856615 | BAT1; YHR208W         | metabolic process;regulation of biological process;response to stimulus                                                   | mitochondrion;organelle lumen                    | catalytic activity                                            | 7.111   | 4.926  | 0.69 |
| Q99297 | Mitochondrial 2-oxodicarboxylate carrier 2 [OS=Saccharomyces cerevisiae S288c]                | 854397 | ODC2; YOR222W         | metabolic process;transport                                                                                               | membrane;mitochondrion                           | structural molecule activity;transporter activity             | 0.778   | 0.54   | 0.69 |
| P06168 | ketol-acid reductoisomerase, mitochondrial [OS=Saccharomyces cerevisiae S288c]                | 851069 | ILV5; YLR355C         | cell organization and biogenesis;metabolic process                                                                        | mitochondrion                                    | catalytic activity;DNA binding;metal ion binding              | 12.895  | 9      | 0.70 |
| P00359 | Glyceraldehyde-3-phosphate dehydrogenase 3 [OS=Saccharomyces cerevisiae S288c]                | 853106 | TDH3; YGR192C         | cell death;metabolic process                                                                                              | cytoplasm;cytosol;membrane;mitochondrion;nucleus | catalytic activity;nucleotide binding;RNA binding             | 6.406   | 4.484  | 0.70 |
| P40416 | Iron-sulfur clusters transporter ATM1, mitochondrial [OS=Saccharomyces cerevisiae S288c]      | 855347 | ATM1; YMR301C         | cellular homeostasis;metabolic process;transport                                                                          | membrane;mitochondrion                           | catalytic activity;nucleotide binding;transporter activity    | 0.645   | 0.453  | 0.70 |
| P43635 | Citrate synthase 3, mitochondrial [OS=Saccharomyces cerevisiae S288c]                         | 856107 | CIT3; YPR001W         | metabolic process                                                                                                         | mitochondrion                                    | catalytic activity                                            | 3.262   | 2.3    | 0.71 |
| Q06892 | NADH kinase POS5, mitochondrial [OS=Saccharomyces cerevisiae S288c]                           | 855913 | POS5; YPL188W         | metabolic process;response to stimulus                                                                                    | mitochondrion;organelle lumen                    | catalytic activity;nucleotide binding                         | 0.52    | 0.369  | 0.71 |
| P32792 | UPF0744 protein YSC83 [OS=Saccharomyces cerevisiae S288c]                                     | 856410 | YSC83; YHR017W        |                                                                                                                           | membrane;mitochondrion                           |                                                               | 0.52    | 0.369  | 0.71 |
| P39726 | Glycine cleavage system H protein, mitochondrial [OS=Saccharomyces cerevisiae S288c]          | 851254 | GCV3; YAL044C         | metabolic process                                                                                                         | mitochondrion                                    | catalytic activity                                            | 3.642   | 2.594  | 0.71 |
| Q04438 | Stationary phase protein 4 [OS=Saccharomyces cerevisiae S288c]                                | 855134 | SPG4; YMR107W         |                                                                                                                           |                                                  |                                                               | 3.642   | 2.594  | 0.71 |
| Q12428 | Probable 2-methylcitrate dehydratase [OS=Saccharomyces cerevisiae S288c]                      | 856108 | PDH1; YPR002W         | metabolic process                                                                                                         | cytoplasm;membrane;mitochondrion                 | catalytic activity                                            | 8.306   | 5.978  | 0.72 |
| Q04935 | Cytochrome c oxidase protein 20, mitochondrial [OS=Saccharomyces cerevisiae S288c]            | 851817 | COX20; YDR231C        | cell organization and biogenesis;metabolic process                                                                        | membrane;mitochondrion                           | protein binding                                               | 1.424   | 1.031  | 0.72 |
| P18239 | ADP,ATP carrier protein 2 [OS=Saccharomyces cerevisiae S288c]                                 | 852250 | PET9; YBL030C         | cell death;metabolic process;transport                                                                                    | membrane;mitochondrion                           | structural molecule activity;transporter activity             | 110.034 | 80.113 | 0.73 |
| P50087 | MICOS subunit MIC26 [OS=Saccharomyces cerevisiae S288c]                                       | 853150 | MOS2; MIC26; YGR235C  | cell organization and biogenesis                                                                                          | membrane;mitochondrion                           |                                                               | 1.276   | 0.931  | 0.73 |
| Q12230 | Sphingolipid long chain base-responsive protein LSP1 [OS=Saccharomyces cerevisiae S288c]      | 856103 | LSP1; YPL004C         | regulation of biological process;response to stimulus;transport                                                           | cytoplasm;membrane;mitochondrion                 |                                                               | 53.117  | 38.811 | 0.73 |
| Q00402 | Nuclear migration protein NUM1 [OS=Saccharomyces cerevisiae S288c]                            | 851727 | NUM1; YDR150W         | cell organization and biogenesis;cellular component movement;metabolic process;regulation of biological process;transport | endoplasmic reticulum;mitochondrion              | catalytic activity;motor activity;protein binding             | 0.052   | 0.038  | 0.73 |
| P54003 | Protein SUR7 [OS=Saccharomyces cerevisiae S288c]                                              | 854953 | SUR7; YML052W         | cell differentiation;transport                                                                                            | membrane;mitochondrion                           |                                                               | 1.154   | 0.848  | 0.73 |
| Q04013 | Citrate/oxoglutarate carrier protein [OS=Saccharomyces cerevisiae S288c]                      | 855282 | YHM2; YMR241W         | cell organization and biogenesis;metabolic process;transport                                                              | membrane;mitochondrion                           | DNA binding;structural molecule activity;transporter activity | 3.467   | 2.548  | 0.73 |
| Q02204 | 54S ribosomal protein L13, mitochondrial [OS=Saccharomyces cerevisiae S288c]                  | 853875 | MRPL13; YKR006C       | cell organization and biogenesis;metabolic process                                                                        | mitochondrion;ribosome                           | structural molecule activity                                  | 1.054   | 0.778  | 0.74 |
| P50945 | MICOS complex subunit MIC27 [OS=Saccharomyces cerevisiae S288c]                               | 855623 | AIM37; MIC27; YNL100W | cell organization and biogenesis                                                                                          | membrane;mitochondrion                           |                                                               | 0.968   | 0.719  | 0.74 |
| P14540 | fructose-bisphosphate aldolase [OS=Saccharomyces cerevisiae S288c]                            | 853805 | FBA1; YKL060C         | metabolic process                                                                                                         | cytoplasm;cytosol;membrane;mitochondrion         | catalytic activity;metal ion binding                          | 0.896   | 0.668  | 0.75 |
| P40508 | Uncharacterized protein YIL077C [OS=Saccharomyces cerevisiae S288c]                           | 854733 | YIL077C; YIL077C      |                                                                                                                           | mitochondrion                                    |                                                               | 0.896   | 0.668  | 0.75 |
| P40496 | 37S ribosomal protein S25, mitochondrial [OS=Saccharomyces cerevisiae S288c]                  | 854715 | RSM25; YIL093C        | cell organization and biogenesis;metabolic process                                                                        | mitochondrion;ribosome                           | structural molecule activity                                  | 0.896   | 0.668  | 0.75 |

|          |                                                                                                             |        |                |                                                                                                          |                                                          |                                                                                     |        |        |      |
|----------|-------------------------------------------------------------------------------------------------------------|--------|----------------|----------------------------------------------------------------------------------------------------------|----------------------------------------------------------|-------------------------------------------------------------------------------------|--------|--------|------|
| Q12166   | 2-isopropylmalate synthase 2, mitochondrial [OS=Saccharomyces cerevisiae S288c]                             | 854275 | LEU9; YOR108W  | metabolic process                                                                                        | mitochondrion                                            | catalytic activity;protein binding                                                  | 2.065  | 1.543  | 0.75 |
| P00560   | Phosphoglycerate kinase [OS=Saccharomyces cerevisiae S288c]                                                 | 850370 | PGK1; YCR012W  | metabolic process                                                                                        | cytoplasm;membrane;mitochondrion                         | catalytic activity;nucleotide binding                                               | 4.412  | 3.299  | 0.75 |
| P34227   | Mitochondrial peroxiredoxin PRX1 [OS=Saccharomyces cerevisiae S288c]                                        | 852215 | PRX1; YBL064C  | cellular homeostasis;metabolic process;regulation of biological process;response to stimulus             | mitochondrion                                            | antioxidant activity;catalytic activity                                             | 5.952  | 4.456  | 0.75 |
| P06208-1 | 2-isopropylmalate synthase [OS=Saccharomyces cerevisiae S288c]                                              | 855619 | LEU4; YNL104C  | metabolic process                                                                                        | cytoplasm;mitochondrion                                  | catalytic activity;protein binding                                                  | 6.017  | 4.541  | 0.75 |
| P38885   | Altered inheritance of mitochondria protein 46, mitochondrial [OS=Saccharomyces cerevisiae S288c]           | 856606 | AIM46; YHR199C |                                                                                                          | mitochondrion                                            | catalytic activity                                                                  | 0.73   | 0.551  | 0.75 |
| P21801   | Succinate dehydrogenase [ubiquinone] iron-sulfur subunit, mitochondrial [OS=Saccharomyces cerevisiae S288c] | 850685 | SDH2; YLL041C  | metabolic process;transport                                                                              | membrane;mitochondrion                                   | catalytic activity;metal ion binding                                                | 32.839 | 24.809 | 0.76 |
| P23641   | mitochondrial phosphate carrier protein [OS=Saccharomyces cerevisiae S288c]                                 | 853540 | MIR1; YJR077C  | metabolic process;transport                                                                              | membrane;mitochondrion                                   | protein binding;structural molecule activity;transporter activity                   | 17.957 | 13.678 | 0.76 |
| P28241   | Isocitrate dehydrogenase [NAD] subunit 2, mitochondrial [OS=Saccharomyces cerevisiae S288c]                 | 854303 | IDH2; YOR136W  | metabolic process                                                                                        | mitochondrion;organelle lumen                            | catalytic activity;metal ion binding;nucleotide binding;protein binding;RNA binding | 4.78   | 3.642  | 0.76 |
| P28834   | Isocitrate dehydrogenase [NAD] subunit 1, mitochondrial [OS=Saccharomyces cerevisiae S288c]                 | 855691 | IDH1; YNL037C  | metabolic process;transport                                                                              | cytosol;mitochondrion;organelle lumen                    | catalytic activity;metal ion binding;nucleotide binding;protein binding;RNA binding | 10.288 | 7.859  | 0.76 |
| P32611   | 54S ribosomal protein RML2, mitochondrial [OS=Saccharomyces cerevisiae S288c]                               | 856660 | RML2; YEL050C  | cell organization and biogenesis;metabolic process                                                       | mitochondrion;ribosome                                   | catalytic activity;RNA binding;structural molecule activity                         | 0.509  | 0.389  | 0.76 |
| Q08223   | Altered inheritance of mitochondria protein 39, mitochondrial [OS=Saccharomyces cerevisiae S288c]           | 854103 | AIM39; YOL053W |                                                                                                          | cytosol;membrane;mitochondrion                           |                                                                                     | 0.468  | 0.359  | 0.77 |
| P32796-1 | Carnitine O-acetyltransferase, mitochondrial [OS=Saccharomyces cerevisiae S288c]                            | 854965 | CAT2; YML042W  | metabolic process;transport                                                                              | membrane;mitochondrion                                   | catalytic activity                                                                  | 10.189 | 7.938  | 0.78 |
| P19882   | heat shock protein 60, mitochondrial [OS=Saccharomyces cerevisiae S288c]                                    | 850963 | HSP60; YLR259C | cell organization and biogenesis;metabolic process;regulation of biological process;transport            | cytoplasm;cytosol;membrane;mitochondrion;organelle lumen | catalytic activity;DNA binding;nucleotide binding;protein binding                   | 39.296 | 30.623 | 0.78 |
| P32453   | Protein ATP11, mitochondrial [OS=Saccharomyces cerevisiae S288c]                                            | 855401 | ATP11; YNL315C | cell organization and biogenesis                                                                         | mitochondrion                                            | protein binding                                                                     | 0.995  | 0.778  | 0.78 |
| P38297   | Mitofusin FZO1 [OS=Saccharomyces cerevisiae S288c]                                                          | 852477 | FZO1; YBR179C  | cell organization and biogenesis                                                                         | membrane;mitochondrion                                   | catalytic activity;nucleotide binding;protein binding                               | 0.248  | 0.194  | 0.78 |
| Q06143   | mitochondrial dicarboxylate transporter [OS=Saccharomyces cerevisiae S288c]                                 | 851063 | DIC1; YLR348C  | metabolic process;transport                                                                              | membrane;mitochondrion                                   | structural molecule activity;transporter activity                                   | 0.931  | 0.73   | 0.78 |
| P49095   | Glycine dehydrogenase (Decarboxylating), mitochondrial [OS=Saccharomyces cerevisiae S288c]                  | 855227 | GCV2; YMR189W  | metabolic process                                                                                        | cytosol;mitochondrion                                    | catalytic activity                                                                  | 1.184  | 0.931  | 0.79 |
| P40495   | Homoisocitrate dehydrogenase, mitochondrial [OS=Saccharomyces cerevisiae S288c]                             | 854714 | LYS12; YIL094C | metabolic process                                                                                        | mitochondrion                                            | catalytic activity;metal ion binding;nucleotide binding                             | 4.623  | 3.642  | 0.79 |
| P35191   | DnaJ homolog 1, mitochondrial [OS=Saccharomyces cerevisiae S288c]                                           | 850530 | MDJ1; YFL016C  | cell organization and biogenesis;metabolic process;regulation of biological process;response to stimulus | mitochondrion;organelle lumen                            | enzyme regulator activity;metal ion binding;nucleotide                              | 1.656  | 1.31   | 0.79 |

|        |                                                                                                     |        |                        |                                                                         |                                              |                                                                           |        |        |      |
|--------|-----------------------------------------------------------------------------------------------------|--------|------------------------|-------------------------------------------------------------------------|----------------------------------------------|---------------------------------------------------------------------------|--------|--------|------|
|        |                                                                                                     |        |                        |                                                                         |                                              | de binding;protein binding                                                |        |        |      |
| P11914 | Mitochondrial-processing peptidase subunit alpha [OS=Saccharomyces cerevisiae S288c]                | 856419 | MAS2; YHR024C          | metabolic process;transport                                             | membrane;mitochondrion;organelle lumen       | catalytic activity;metal ion binding;protein binding                      | 0.738  | 0.585  | 0.79 |
| Q03976 | 37S ribosomal protein S24, mitochondrial [OS=Saccharomyces cerevisiae S288c]                        | 851755 | RSM24; YDR175C         | cell organization and biogenesis;metabolic process                      | mitochondrion;ribosome                       | structural molecule activity                                              | 0.738  | 0.585  | 0.79 |
| P32891 | D-lactate dehydrogenase [cytochrome] 1, mitochondrial [OS=Saccharomyces cerevisiae S288c]           | 851380 | DLD1; YDL174C          | metabolic process;transport                                             | membrane;mitochondrion                       | catalytic activity;nucleotide binding                                     | 11.253 | 9      | 0.80 |
| Q03430 | 37S ribosomal protein RSM28, mitochondrial [OS=Saccharomyces cerevisiae S288c]                      | 852105 | RSM28; YDR494W         | cell organization and biogenesis;metabolic process                      | mitochondrion;ribosome                       | structural molecule activity                                              | 1.015  | 0.823  | 0.81 |
| Q07651 | SUR7 family protein FMP45 [OS=Saccharomyces cerevisiae S288c]                                       | 851304 | FMP45; YDL222C         | cell differentiation;cell organization and biogenesis                   | membrane;mitochondrion                       |                                                                           | 7.377  | 6.017  | 0.82 |
| P00431 | cytochrome c peroxidase, mitochondrial [OS=Saccharomyces cerevisiae S288c]                          | 853940 | CCP1; YKR066C          | metabolic process;response to stimulus                                  | mitochondrion;organelle lumen                | antioxidant activity;catalytic activity;metal ion binding;protein binding | 0.859  | 0.701  | 0.82 |
| P42940 | Probable electron transfer flavoprotein subunit beta [OS=Saccharomyces cerevisiae S288c]            | 853121 | CIR1; YGR207C          | metabolic process;transport                                             | mitochondrion;organelle lumen                |                                                                           | 3.217  | 2.652  | 0.82 |
| P16547 | Mitochondrial outer membrane protein OM45 [OS=Saccharomyces cerevisiae S288c]                       | 854670 | OM45; YIL136W          |                                                                         | membrane;mitochondrion                       |                                                                           | 574.44 | 477.63 | 0.83 |
| P00175 | Cytochrome b2, mitochondrial [OS=Saccharomyces cerevisiae S288c]                                    | 854950 | CYB2; YML054C          | metabolic process;transport                                             | cytosol;membrane;mitochondrion;nucleus       | catalytic activity;metal ion binding;nucleotide binding                   | 0.496  | 0.413  | 0.83 |
| P00330 | Alcohol dehydrogenase 1 [OS=Saccharomyces cerevisiae S288c]                                         | 854068 | ADH1; YOL086C          | metabolic process                                                       | cytoplasm;membrane                           | catalytic activity;metal ion binding                                      | 2.36   | 1.976  | 0.84 |
| P00890 | citrate synthase, mitochondrial [OS=Saccharomyces cerevisiae S288c]                                 | 855732 | CIT1; YNR001C          | metabolic process;transport                                             | cytosol;mitochondrion;organelle lumen        | catalytic activity                                                        | 14.086 | 11.798 | 0.84 |
| P32191 | Glycerol-3-phosphate dehydrogenase, mitochondrial [OS=Saccharomyces cerevisiae S288c]               | 854651 | GUT2; YIL155C          | metabolic process                                                       | membrane;mitochondrion                       | catalytic activity                                                        | 5.434  | 4.555  | 0.84 |
| Q12031 | Mitochondrial 2-methylisocitrate lyase [OS=Saccharomyces cerevisiae S288c]                          | 856114 | ICL2; YPR006C          | metabolic process                                                       | mitochondrion;organelle lumen                | catalytic activity                                                        | 2.793  | 2.36   | 0.84 |
| Q12374 | Nuclear control of ATPase protein 2 [OS=Saccharomyces cerevisiae S288c]                             | 856278 | NCA2; YPR155C          | metabolic process                                                       | membrane;mitochondrion                       |                                                                           | 0.668  | 0.565  | 0.85 |
| Q08818 | Meiotic sister-chromatid recombination protein 6, mitochondrial [OS=Saccharomyces cerevisiae S288c] | 854536 | MSC6; YOR354C          | metabolic process                                                       | mitochondrion;organelle lumen                | RNA binding                                                               | 0.506  | 0.431  | 0.85 |
| P32335 | Protein MSS51, mitochondrial [OS=Saccharomyces cerevisiae S288c]                                    | 850900 | MSS51; YLR203C         | metabolic process;regulation of biological process                      | membrane;mitochondrion                       | protein binding;translation regulator activity                            | 0.995  | 0.848  | 0.85 |
| Q03028 | Mitochondrial 2-oxodicarboxylate carrier 1 [OS=Saccharomyces cerevisiae S288c]                      | 855969 | ODC1; YPL134C          | metabolic process;transport                                             | membrane;mitochondrion                       | structural molecule activity;transporter activity                         | 4.995  | 4.275  | 0.86 |
| P25374 | Cysteine desulfurase, mitochondrial [OS=Saccharomyces cerevisiae S288c]                             | 850343 | NFS1; YCL017C          | cell organization and biogenesis;cellular homeostasis;metabolic process | mitochondrion;nucleus                        | catalytic activity;metal ion binding;protein binding                      | 1.346  | 1.154  | 0.86 |
| Q07349 | MIOREX complex component 9 [OS=Saccharomyces cerevisiae S288c]                                      | 851535 | YDL027C; MRX9; YDL027C |                                                                         | endoplasmic reticulum;membrane;mitochondrion |                                                                           | 1.276  | 1.096  | 0.86 |
| P39522 | Dihydroxy-acid dehydratase, mitochondrial [OS=Saccharomyces cerevisiae S288c]                       | 853473 | ILV3; YJR016C          | metabolic process                                                       | mitochondrion                                | catalytic activity;metal ion binding                                      | 13.175 | 11.328 | 0.86 |
| P23180 | Probable oxidoreductase AIM17 [OS=Saccharomyces cerevisiae S288c]                                   | 856365 | AIM17; YHL021C         | cell organization and biogenesis;metabolic process                      | mitochondrion                                | catalytic activity;metal ion binding                                      | 3.467  | 2.981  | 0.86 |
| P53292 | 37S ribosomal protein S35, mitochondrial [OS=Saccharomyces cerevisiae S288c]                        | 853075 | MRPS35; YGR165W        | cell organization and biogenesis;metabolic process                      | mitochondrion;ribosome                       | structural molecule activity                                              | 1.754  | 1.512  | 0.86 |

|        |                                                                                                              |            |                                |                                                                                                          |                                                 |                                                                                |            |            |      |
|--------|--------------------------------------------------------------------------------------------------------------|------------|--------------------------------|----------------------------------------------------------------------------------------------------------|-------------------------------------------------|--------------------------------------------------------------------------------|------------|------------|------|
| P32473 | Pyruvate dehydrogenase E1 component subunit beta, mitochondrial [OS=Saccharomyces cerevisiae S288c]          | 85252<br>2 | PDB1;<br>YBR221C               | metabolic process                                                                                        | mitochondrion;organelle lumen                   | catalytic activity                                                             | 6.848      | 5.952      | 0.87 |
| P16622 | Ferrochelatase, mitochondrial [OS=Saccharomyces cerevisiae S288c]                                            | 85434<br>7 | HEM15;<br>YOR176<br>W          | metabolic process                                                                                        | membrane;mitochondrion                          | catalytic activity                                                             | 4.337      | 3.806      | 0.88 |
| Q00711 | Succinate dehydrogenase [ubiquinone] flavoprotein subunit, mitochondrial [OS=Saccharomyces cerevisiae S288c] | 85370<br>9 | SDH1;<br>YKL148C               | metabolic process;transport                                                                              | membrane;mitochondrion                          | catalytic activity;nucleotide binding;protein binding                          | 9.578      | 8.454      | 0.88 |
| Q01163 | 37S ribosomal protein S23, mitochondrial [OS=Saccharomyces cerevisiae S288c]                                 | 85274<br>8 | RSM23;<br>YGL129C              | cell organization and biogenesis;metabolic process                                                       | mitochondrion;ribosome                          | catalytic activity;nucleotide binding;RNA binding;structural molecule activity | 1.11       | 0.983      | 0.89 |
| P07806 | Valine--tRNA ligase, mitochondrial [OS=Saccharomyces cerevisiae S288c]                                       | 85298<br>6 | VAS1;<br>YGR094<br>W           | metabolic process;regulation of biological process                                                       | cytoplasm;cytosol;mitochondrion                 | catalytic activity;nucleotide binding                                          | 0.377      | 0.334      | 0.89 |
| Q12466 | tricalbin-1 [OS=Saccharomyces cerevisiae S288c]                                                              | 85425<br>3 | TCB1;<br>YOR086<br>C           | cell organization and biogenesis;regulation of biological process                                        | endoplasmic reticulum;membrane;mitochondrion    | metal ion binding;protein binding                                              | 0.468      | 0.417      | 0.89 |
| P17505 | Malate dehydrogenase, mitochondrial [OS=Saccharomyces cerevisiae S288c]                                      | 85377<br>7 | MDH1;<br>YKL085<br>W           | metabolic process                                                                                        | mitochondrion;organelle lumen                   | catalytic activity;protein binding;RNA binding                                 | 40.59<br>6 | 36.27<br>6 | 0.89 |
| P19414 | Aconitate hydratase, mitochondrial [OS=Saccharomyces cerevisiae S288c]                                       | 85101<br>3 | ACO1;<br>YLR304C               | cell organization and biogenesis;metabolic process;transport                                             | cytoplasm;cytosol;mitochondrion;organelle lumen | catalytic activity;DNA binding;metal ion binding                               | 30.62<br>3 | 27.61      | 0.90 |
| P33416 | Heat shock protein 78, mitochondrial [OS=Saccharomyces cerevisiae S288c]                                     | 85184<br>5 | HSP78;<br>YDR258<br>C          | cell organization and biogenesis;metabolic process;regulation of biological process;response to stimulus | mitochondrion;organelle lumen                   | catalytic activity;nucleotide binding;protein binding                          | 3.359      | 3.042      | 0.91 |
| Q07500 | External NADH-ubiquinone oxidoreductase 2, mitochondrial [OS=Saccharomyces cerevisiae S288c]                 | 85147<br>4 | NDE2;<br>YDL085<br>W           | metabolic process                                                                                        | mitochondrion                                   | catalytic activity;nucleotide binding                                          | 4.012      | 3.642      | 0.91 |
| P36112 | MICOS complex subunit Mic60 [OS=Saccharomyces cerevisiae S288c]                                              | 85388<br>6 | FCJ1;<br>MIC60;<br>YKR016<br>W | cell organization and biogenesis;transport                                                               | membrane;mitochondrion                          |                                                                                | 12.89<br>5 | 11.79<br>8 | 0.91 |
| P32340 | Rotenone-insensitive NADH-ubiquinone oxidoreductase, mitochondrial [OS=Saccharomyces cerevisiae S288c]       | 85491<br>9 | NDI1;<br>YML120<br>C           | metabolic process;regulation of biological process                                                       | membrane;mitochondrion;organelle lumen          | catalytic activity;nucleotide binding                                          | 17.87<br>4 | 16.43<br>3 | 0.92 |
| P53312 | Succinyl-CoA ligase [ADP-forming] subunit beta, mitochondrial [OS=Saccharomyces cerevisiae S288c]            | 85315<br>9 | LSC2;<br>YGR244<br>C           | metabolic process                                                                                        | mitochondrion                                   | catalytic activity;nucleotide binding                                          | 9          | 8.284      | 0.92 |
| P07213 | Mitochondrial import receptor subunit TOM70 [OS=Saccharomyces cerevisiae S288c]                              | 85560<br>2 | TOM70;<br>YNL121C              | cell organization and biogenesis;transport                                                               | membrane;mitochondrion                          | protein binding;transporter activity                                           | 2.888      | 2.665      | 0.92 |
| P00830 | ATP synthase subunit beta, mitochondrial [OS=Saccharomyces cerevisiae S288c]                                 | 85358<br>5 | ATP2;<br>YJR121<br>W           | metabolic process;transport                                                                              | cytosol;membrane;mitochondrion                  | catalytic activity;nucleotide binding;protein binding;transporter activity     | 30.62<br>3 | 28.28<br>6 | 0.92 |
| P40341 | Mitochondrial respiratory chain complexes assembly protein YTA12 [OS=Saccharomyces cerevisiae S288c]         | 85511<br>4 | YTA12;<br>YMR089<br>C          | cell organization and biogenesis;metabolic process;response to stimulus;transport                        | cytoplasm;membrane;mitochondrion                | catalytic activity;metal ion binding;nucleotide binding;protein binding        | 1.184      | 1.096      | 0.93 |
| P46367 | Potassium-activated aldehyde dehydrogenase, mitochondrial [OS=Saccharomyces cerevisiae S288c]                | 85455<br>6 | ALD4;<br>YOR374<br>W           | metabolic process                                                                                        | mitochondrion;organelle lumen                   | catalytic activity                                                             | 25.82<br>7 | 24.11<br>9 | 0.93 |
| P30624 | Long-chain-fatty-acid--CoA ligase 1 [OS=Saccharomyces cerevisiae S288c]                                      | 85449<br>5 | FAA1;<br>YOR317<br>W           | metabolic process;transport                                                                              | endoplasmic reticulum;membrane;mitochondrion    | catalytic activity;nucleotide binding                                          | 7.072      | 7.072      | 1.00 |
| P07342 | Acetolactate synthase catalytic subunit, mitochondrial [OS=Saccharomyces cerevisiae S288c]                   | 85513<br>5 | ILV2;<br>YMR108<br>W           | metabolic process                                                                                        | mitochondrion                                   | catalytic activity;metal ion binding;nucleotide binding                        | 4.223      | 4.223      | 1.00 |
| P08067 | cytochrome b-c1 complex subunit Rieske, mitochondrial [OS=Saccharomyces cerevisiae S288c]                    | 85668<br>9 | RIP1;<br>YEL024<br>W           | metabolic process;transport                                                                              | membrane;mitochondrion                          | catalytic activity;metal ion binding;transporter activity                      | 20.54<br>4 | 20.54<br>4 | 1.00 |



|        |                                                                                                                         |        |                 |                                                                                     |                                  |                                                                           |        |        |      |
|--------|-------------------------------------------------------------------------------------------------------------------------|--------|-----------------|-------------------------------------------------------------------------------------|----------------------------------|---------------------------------------------------------------------------|--------|--------|------|
| Q02486 | ARS-binding factor 2, mitochondrial [OS=Saccharomyces cerevisiae S288c]                                                 | 855094 | ABF2; YMR072W   | cell organization and biogenesis;metabolic process;regulation of biological process | chromosome;mitochondrion;nucleus | DNA binding                                                               | 27.943 | 27.943 | 1.00 |
| P04037 | cytochrome c oxidase subunit 4, mitochondrial [OS=Saccharomyces cerevisiae S288c]                                       | 852688 | COX4; YGL187C   | cell organization and biogenesis;metabolic process;transport                        | membrane;mitochondrion           | catalytic activity;metal ion binding;transporter activity                 | 17.738 | 17.738 | 1.00 |
| P50085 | Prohibitin-2 [OS=Saccharomyces cerevisiae S288c]                                                                        | 853146 | PHB2; YGR231C   | cell organization and biogenesis;metabolic process;regulation of biological process | membrane;mitochondrion           | protein binding                                                           | 3.329  | 3.329  | 1.00 |
| P07246 | Alcohol dehydrogenase 3, mitochondrial [OS=Saccharomyces cerevisiae S288c]                                              | 855107 | ADH3; YMR083W   | metabolic process                                                                   | mitochondrion;organelle lumen    | catalytic activity;metal ion binding                                      | 4.179  | 4.179  | 1.00 |
| P32795 | Mitochondrial inner membrane F <sub>1</sub> -AAA protease supercomplex subunit YME1 [OS=Saccharomyces cerevisiae S288c] | 856135 | YME1; YPR024W   | metabolic process;response to stimulus;transport                                    | membrane;mitochondrion           | catalytic activity;metal ion binding;nucleotide binding;protein binding   | 0.891  | 0.891  | 1.00 |
| P38988 | Mitochondrial GTP/GDP carrier protein 1 [OS=Saccharomyces cerevisiae S288c]                                             | 851329 | GGC1; YDL198C   | cell organization and biogenesis;cellular homeostasis;metabolic process;transport   | membrane;mitochondrion           | structural molecule activity;transporter activity                         | 4.179  | 4.179  | 1.00 |
| Q12480 | Probable electron transfer flavoprotein subunit alpha, mitochondrial [OS=Saccharomyces cerevisiae S288c]                | 856112 | AIM45; YPR004C  | metabolic process;transport                                                         | mitochondrion;organelle lumen    | catalytic activity;nucleotide binding                                     | 1.818  | 1.818  | 1.00 |
| P40961 | prohibitin-1 [OS=Saccharomyces cerevisiae S288c]                                                                        | 853033 | PHB1; YGR132C   | cell organization and biogenesis;metabolic process;regulation of biological process | membrane;mitochondrion           | protein binding                                                           | 2.793  | 2.793  | 1.00 |
| P36046 | Mitochondrial intermembrane space import and assembly protein 40 [OS=Saccharomyces cerevisiae S288c]                    | 853639 | MIA40; YKL195W  | cellular component movement;metabolic process;response to stimulus;transport        | membrane;mitochondrion           | catalytic activity;protein binding;transporter activity                   | 1.555  | 1.555  | 1.00 |
| P53140 | Protein RMD9, mitochondrial [OS=Saccharomyces cerevisiae S288c]                                                         | 852771 | RMD9; YGL107C   | cell differentiation;metabolic process;regulation of biological process             | membrane;mitochondrion           | RNA binding                                                               | 0.585  | 0.585  | 1.00 |
| P53721 | Respiratory supercomplex factor 2, mitochondrial [OS=Saccharomyces cerevisiae S288c]                                    | 855752 | RCF2; YNR018W   | cell organization and biogenesis                                                    | membrane;mitochondrion           |                                                                           | 5.579  | 5.579  | 1.00 |
| P32897 | Mitochondrial import inner membrane translocase subunit tim23 [OS=Saccharomyces cerevisiae S288c]                       | 855751 | TIM23; YNR017W  | transport                                                                           | membrane;mitochondrion           | protein binding;transporter activity                                      | 2.981  | 2.981  | 1.00 |
| P43616 | Cys-Gly metalloprotease dug1 [OS=Saccharomyces cerevisiae S288c]                                                        | 850605 | DUG1; YFR044C   | metabolic process                                                                   | cytoplasm;mitochondrion;ribosome | catalytic activity;metal ion binding                                      | 0.711  | 0.711  | 1.00 |
| P00410 | Cytochrome c oxidase subunit 2 [OS=Saccharomyces cerevisiae S288c]                                                      | 854622 | COX2; QO250     | metabolic process;transport                                                         | membrane;mitochondrion           | catalytic activity;metal ion binding;protein binding;transporter activity | 1.61   | 1.61   | 1.00 |
| P32331 | Carrier protein YMC1, mitochondrial [OS=Saccharomyces cerevisiae S288c]                                                 | 856171 | YMC1; YPR058W   | metabolic process;transport                                                         | membrane;mitochondrion;vacuole   | structural molecule activity;transporter activity                         | 0.968  | 0.968  | 1.00 |
| P38325 | Mitochondrial outer membrane protein OM14 [OS=Saccharomyces cerevisiae S288c]                                           | 852531 | OM14; YBR230C   | transport                                                                           | membrane;mitochondrion           |                                                                           | 4.179  | 4.179  | 1.00 |
| P53881 | 54S ribosomal protein L22, mitochondrial [OS=Saccharomyces cerevisiae S288c]                                            | 855544 | MRPL22; YNL177C | cell organization and biogenesis;metabolic process                                  | mitochondrion;ribosome           | RNA binding;structural molecule activity                                  | 0.551  | 0.551  | 1.00 |
| P23644 | Mitochondrial import receptor subunit TOM40 [OS=Saccharomyces cerevisiae S288c]                                         | 855243 | TOM40; YMR203W  | transport                                                                           | cytosol;membrane;mitochondrion   | protein binding;transporter activity                                      | 0.896  | 0.896  | 1.00 |
| P10507 | mitochondrial-processing peptidase subunit beta [OS=Saccharomyces cerevisiae S288c]                                     | 850860 | MAS1; YLR163C   | metabolic process;transport                                                         | mitochondrion;organelle lumen    | catalytic activity;metal ion binding;protein binding                      | 0.616  | 0.616  | 1.00 |
| Q06493 | LETM1 domain-containing protein YLH47, mitochondrial [OS=Saccharomyces cerevisiae S288c]                                | 856243 | YLH47; YPR125W  | cell organization and biogenesis;transport                                          | membrane;mitochondrion           |                                                                           | 0.61   | 0.61   | 1.00 |
| Q04728 | Arginine biosynthesis bifunctional protein ArgJ, mitochondrial [OS=Saccharomyces cerevisiae S288c]                      | 855084 | ARG7; YMR062C   | metabolic process                                                                   | mitochondrion;organelle lumen    | catalytic activity                                                        | 0.417  | 0.417  | 1.00 |

|        |                                                                                                                |        |                  |                                                                                              |                                         |                                                                 |       |       |      |
|--------|----------------------------------------------------------------------------------------------------------------|--------|------------------|----------------------------------------------------------------------------------------------|-----------------------------------------|-----------------------------------------------------------------|-------|-------|------|
| P53969 | Sorting assembly machinery 50 kDa subunit [OS=Saccharomyces cerevisiae S288c]                                  | 855705 | SAM50; YNL026W   | cell organization and biogenesis;transport                                                   | membrane;mitochondrion                  | protein binding;transporter activity                            | 0.374 | 0.374 | 1.00 |
| P25573 | Mitochondrial inner membrane f-AAA protease supercomplex subunit MGR1 [OS=Saccharomyces cerevisiae S288c]      | 850313 | MGR1; YCL044C    | metabolic process                                                                            | membrane;mitochondrion                  | protein binding                                                 | 0.701 | 0.701 | 1.00 |
| P22136 | ATPase expression protein 2, mitochondrial [OS=Saccharomyces cerevisiae S288c]                                 | 855325 | AEP2; YMR282C    | metabolic process;regulation of biological process                                           | mitochondrion                           | RNA binding                                                     | 0.292 | 0.292 | 1.00 |
| P38910 | 10 kDa heat shock protein, mitochondrial [OS=Saccharomyces cerevisiae S288c]                                   | 854185 | HSP10; YOR020C   | cell organization and biogenesis;metabolic process;response to stimulus;transport            | cytoplasm;mitochondrion;organelle lumen | metal ion binding;nucleotide binding;protein binding            | 2.162 | 2.162 | 1.00 |
| P38523 | GrpE protein homolog, mitochondrial [OS=Saccharomyces cerevisiae S288c]                                        | 854407 | MGE1; YOR232W    | metabolic process;regulation of biological process;transport                                 | membrane;mitochondrion;organelle lumen  | enzyme regulator activity;nucleotide binding;protein binding    | 0.624 | 0.624 | 1.00 |
| P19955 | 37S ribosomal protein YMR-31, mitochondrial [OS=Saccharomyces cerevisiae S288c]                                | 850610 | YMR31; YFR049W   | cell organization and biogenesis;metabolic process                                           | mitochondrion;ribosome                  | catalytic activity;protein binding;structural molecule activity | 2.594 | 2.594 | 1.00 |
| Q03798 | Altered inheritance of mitochondria protein 36, mitochondrial [OS=Saccharomyces cerevisiae S288c]              | 855189 | AIM36; YMR157C   |                                                                                              | membrane;mitochondrion                  |                                                                 | 0.624 | 0.624 | 1.00 |
| Q12482 | Mitochondrial aspartate-glutamate transporter AGC1 [OS=Saccharomyces cerevisiae S288c]                         | 856132 | AGC1; YPR021C    | metabolic process;transport                                                                  | membrane;mitochondrion                  | structural molecule activity;transporter activity               | 0.238 | 0.238 | 1.00 |
| P41921 | glutathione reductase [OS=Saccharomyces cerevisiae S288c]                                                      | 856014 | GLR1; YPL091W    | cellular homeostasis;metabolic process;regulation of biological process;response to stimulus | cytoplasm;cytosol;mitochondrion;nucleus | antioxidant activity;catalytic activity;nucleotide binding      | 0.334 | 0.334 | 1.00 |
| P53889 | uncharacterized mitochondrial hydrolase FMP41 [OS=Saccharomyces cerevisiae S288c]                              | 855553 | FMP41; YNL168C   | metabolic process                                                                            | mitochondrion                           | catalytic activity;metal ion binding                            | 0.501 | 0.501 | 1.00 |
| O14467 | multi-protein-bridging factor 1 [OS=Saccharomyces cerevisiae S288c]                                            | 854474 | MBF1; YOR298C-A  | metabolic process;regulation of biological process                                           | cytoplasm;mitochondrion;nucleus         | DNA binding                                                     | 0.874 | 0.874 | 1.00 |
| P37299 | cytochrome b-c1 complex subunit 10 [OS=Saccharomyces cerevisiae S288c]                                         | 856390 | QCR10; YHR001W-A | metabolic process;transport                                                                  | membrane;mitochondrion                  | catalytic activity;transporter activity                         | 2.981 | 2.981 | 1.00 |
| Q03327 | Mitochondrial fusion and transport protein Ugo1 [OS=Saccharomyces cerevisiae S288c]                            | 852081 | UGO1; YDR470C    | cell organization and biogenesis;metabolic process                                           | membrane;mitochondrion                  | protein binding;structural molecule activity                    | 0.701 | 0.701 | 1.00 |
| P36151 | Uncharacterized protein YKR070W [OS=Saccharomyces cerevisiae S288c]                                            | 853944 | YKR070W; YKR070W | metabolic process                                                                            | mitochondrion                           |                                                                 | 0.438 | 0.438 | 1.00 |
| P32902 | 37S ribosomal protein MRP4, mitochondrial [OS=Saccharomyces cerevisiae S288c]                                  | 856384 | MRP4; YHL004W    | cell organization and biogenesis;metabolic process                                           | mitochondrion;ribosome                  | structural molecule activity                                    | 0.468 | 0.468 | 1.00 |
| Q02883 | N-acyl-phosphatidylethanolamine-hydrolyzing phospholipase D, mitochondrial [OS=Saccharomyces cerevisiae S288c] | 856001 | FMP30; YPL103C   | metabolic process                                                                            | membrane;mitochondrion                  | catalytic activity;metal ion binding                            | 0.304 | 0.304 | 1.00 |
| P17558 | 37S ribosomal protein PET123, mitochondrial [OS=Saccharomyces cerevisiae S288c]                                | 854329 | PET123; YOR158W  | cell organization and biogenesis;metabolic process                                           | mitochondrion;ribosome                  | structural molecule activity                                    | 0.668 | 0.668 | 1.00 |
| P47045 | mitochondrial import inner membrane translocase subunit TIM54 [OS=Saccharomyces cerevisiae S288c]              | 853392 | TIM54; YJL054W   | cell organization and biogenesis;transport                                                   | cytosol;membrane;mitochondrion          | transporter activity                                            | 0.334 | 0.334 | 1.00 |
| P00401 | Cytochrome c oxidase subunit 1 [OS=Saccharomyces cerevisiae S288c]                                             | 854598 | COX1; Q0045      | metabolic process;transport                                                                  | membrane;mitochondrion                  | catalytic activity;metal ion binding;transporter activity       | 0.778 | 0.778 | 1.00 |
| P38705 | Serine-tRNA ligase, mitochondrial [OS=Saccharomyces cerevisiae S288c]                                          | 856402 | DIA4; YHR011W    | metabolic process                                                                            | cytoplasm;mitochondrion;organelle lumen | catalytic activity;nucleotide binding                           | 0.15  | 0.15  | 1.00 |
| P25038 | Translation initiation factor IF-2, mitochondrial [OS=Saccharomyces cerevisiae S288c]                          | 854135 | IFM1; YOL023W    | cell organization and biogenesis;metabolic process                                           | mitochondrion;nucleus                   | catalytic activity;nucleotide binding;RNA binding               | 0.11  | 0.11  | 1.00 |

|          |                                                                                                            |            |                                       |                                                                                                        |                                                  |                                                            |       |       |      |
|----------|------------------------------------------------------------------------------------------------------------|------------|---------------------------------------|--------------------------------------------------------------------------------------------------------|--------------------------------------------------|------------------------------------------------------------|-------|-------|------|
| P32839   | Mitochondrial chaperone BCS1 [OS=Saccharomyces cerevisiae S288c]                                           | 85198<br>1 | BCS1;<br>YDR375<br>C                  | cell organization and biogenesis;metabolic process;response to stimulus;transport                      | cytosol;membrane;mitochondrion                   | catalytic activity;nucleotide binding;transporter activity | 0.194 | 0.194 | 1.00 |
| P38714   | Arginine--tRNA ligase, mitochondrial [OS=Saccharomyces cerevisiae S288c]                                   | 85649<br>1 | MSR1;<br>YHR091<br>C                  | cell organization and biogenesis;metabolic process                                                     | cytoplasm;mitochondrion;organelle lumen          | catalytic activity;nucleotide binding                      | 0.055 | 0.055 | 1.00 |
| Q12375   | mitochondrial ornithine transporter 1 [OS=Saccharomyces cerevisiae S288c]                                  | 85429<br>7 | ORT1;<br>YOR130<br>C                  | metabolic process;transport                                                                            | membrane;mitochondrion                           | structural molecule activity;transporter activity          | 0.54  | 0.54  | 1.00 |
| P38169   | Kynurenine 3-monooxygenase [OS=Saccharomyces cerevisiae S288c]                                             | 85217<br>9 | BNA4;<br>YBL098<br>W                  | metabolic process                                                                                      | membrane;mitochondrion                           | catalytic activity;nucleotide binding                      | 0.172 | 0.172 | 1.00 |
| P34222   | Peptidyl-tRNA hydrolase 2 [OS=Saccharomyces cerevisiae S288c]                                              | 85222<br>3 | PTH2;<br>YBL057C                      | regulation of biological process                                                                       | cytoplasm;cytosol;membrane;mitochondrion         | catalytic activity;protein binding                         | 0.425 | 0.425 | 1.00 |
| P53732   | 37S ribosomal protein S12, mitochondrial [OS=Saccharomyces cerevisiae S288c]                               | 85577<br>2 | MRPS12<br>;<br>YNR036<br>C            | cell organization and biogenesis;metabolic process                                                     | mitochondrion;ribosome                           | structural molecule activity                               | 0.668 | 0.668 | 1.00 |
| P40502   | Altered inheritance of mitochondria protein 19, mitochondrial [OS=Saccharomyces cerevisiae S288c]          | 85472<br>2 | AIM19;<br>YIL087C                     |                                                                                                        | membrane;mitochondrion                           |                                                            | 0.585 | 0.585 | 1.00 |
| P40165   | NAD(P)H-hydrate epimerase [OS=Saccharomyces cerevisiae S288c]                                              | 85552<br>1 | YNL200C<br>;<br>YNL200C               | metabolic process                                                                                      | cytoplasm;mitochondrion                          | catalytic activity;metal ion binding;nucleotide binding    | 0.468 | 0.468 | 1.00 |
| P38172   | MIOREX complex component 3 [OS=Saccharomyces cerevisiae S288c]                                             | 85218<br>1 | YBL095<br>W;<br>MRX3;<br>YBL095<br>W  |                                                                                                        | membrane;mitochondrion                           |                                                            | 0.311 | 0.311 | 1.00 |
| P39515   | mitochondrial import inner membrane translocase subunit Tim17 [OS=Saccharomyces cerevisiae S288c]          | 85329<br>8 | TIM17;<br>YJL143<br>W                 | cell organization and biogenesis;transport                                                             | membrane;mitochondrion                           | protein binding;transporter activity                       | 1.371 | 1.371 | 1.00 |
| P40159   | Uncharacterized protein YNL208W [OS=Saccharomyces cerevisiae S288c]                                        | 85551<br>3 | YNL208<br>W;<br>YNL208<br>W           |                                                                                                        | membrane;mitochondrion;ribosome                  |                                                            | 0.292 | 0.292 | 1.00 |
| P19516   | Cytochrome c oxidase assembly protein COX11, mitochondrial [OS=Saccharomyces cerevisiae S288c]             | 85597<br>1 | COX11;<br>YPL132<br>W                 | cell organization and biogenesis;metabolic process                                                     | membrane;mitochondrion;ribosome                  | metal ion binding                                          | 0.274 | 0.274 | 1.00 |
| P48360   | Probable NADPH:adenodoxin oxidoreductase, mitochondrial [OS=Saccharomyces cerevisiae S288c]                | 85198<br>2 | ARH1;<br>YDR376<br>W                  | cellular homeostasis;metabolic process;transport                                                       | cytoplasm;membrane;mitochondrion;organelle lumen | catalytic activity                                         | 0.16  | 0.16  | 1.00 |
| Q05648   | MIOREX complex component 10 [OS=Saccharomyces cerevisiae S288c]                                            | 85187<br>6 | YDR282<br>C;<br>MRX10;<br>YDR282<br>C |                                                                                                        | membrane;mitochondrion                           |                                                            | 0.222 | 0.222 | 1.00 |
| P40530   | [Pyruvate dehydrogenase (acetyl-transferring)] kinase 1, mitochondrial [OS=Saccharomyces cerevisiae S288c] | 85476<br>9 | PKP1;<br>YIL042C                      | metabolic process                                                                                      | mitochondrion;organelle lumen                    | catalytic activity;nucleotide binding;protein binding      | 0.245 | 0.245 | 1.00 |
| P22438   | Methionine--tRNA ligase, mitochondrial [OS=Saccharomyces cerevisiae S288c]                                 | 85308<br>1 | MSM1;<br>YGR171<br>C                  | metabolic process                                                                                      | cytoplasm;cytosol;mitochondrion;organelle lumen  | catalytic activity;nucleotide binding                      | 0.136 | 0.136 | 1.00 |
| Q01976   | ADP-ribose pyrophosphatase [OS=Saccharomyces cerevisiae S288c]                                             | 85240<br>8 | YSA1;<br>YBR111C                      | metabolic process                                                                                      | cytoplasm;mitochondrion;nucleus                  | catalytic activity;metal ion binding                       | 0.194 | 0.194 | 1.00 |
| Q01532-1 | Cysteine proteinase 1, mitochondrial [OS=Saccharomyces cerevisiae S288c]                                   |            |                                       | metabolic process;regulation of biological process;response to stimulus                                | cytoplasm;mitochondrion                          | catalytic activity;DNA binding;RNA binding                 | 0.179 | 0.179 | 1.00 |
| P25372   | Thioredoxin-3, mitochondrial [OS=Saccharomyces cerevisiae S288c]                                           | 85044<br>4 | TRX3;<br>YCR083<br>W                  | cellular homeostasis;metabolic process;regulation of biological process;response to stimulus;transport | cytoplasm;mitochondrion                          | catalytic activity                                         | 0.52  | 0.52  | 1.00 |
| P21306   | ATP synthase subunit epsilon, mitochondrial [OS=Saccharomyces cerevisiae S288c]                            | 85585<br>7 | ATP15;<br>YPL271<br>W                 | metabolic process;transport                                                                            | membrane;mitochondrion                           | catalytic activity;transporter activity                    | 0.778 | 0.778 | 1.00 |
| Q06405   | ATP synthase subunit f, mitochondrial [OS=Saccharomyces cerevisiae S288c]                                  | 85198<br>3 | ATP17;<br>YDR377<br>W                 | metabolic process;transport                                                                            | membrane;mitochondrion                           | catalytic activity;transporter activity                    | 1.512 | 1.512 | 1.00 |
| P46998   | mitochondrial membrane protein FMP33 [OS=Saccharomyces cerevisiae S288c]                                   | 85327<br>9 | FMP33;<br>YJL161<br>W                 |                                                                                                        | membrane;mitochondrion                           |                                                            | 0.334 | 0.334 | 1.00 |

|        |                                                                                            |            |                                 |                                                    |                                              |                                                      |       |       |      |
|--------|--------------------------------------------------------------------------------------------|------------|---------------------------------|----------------------------------------------------|----------------------------------------------|------------------------------------------------------|-------|-------|------|
| P32463 | Acyl carrier protein, mitochondrial [OS=Saccharomyces cerevisiae S288c]                    | 85364<br>2 | ACP1;<br>YKL192C                | metabolic process;transport                        | mitochondrion                                |                                                      | 0.259 | 0.259 | 1.00 |
| Q07821 | Iron-sulfur assembly protein 1 [OS=Saccharomyces cerevisiae S288c]                         | 85063<br>2 | ISA1;<br>YLL027<br>W            | cell organization and biogenesis;metabolic process | mitochondrion;organelle lumen                | metal ion binding;structural molecule activity       | 0.136 | 0.136 | 1.00 |
| P25345 | Asparagine-tRNA ligase, mitochondrial [OS=Saccharomyces cerevisiae S288c]                  | 85038<br>8 | SLM5;<br>YCR024C                | metabolic process                                  | cytoplasm;mitochondrion;organelle lumen      | catalytic activity;nucleotide binding                | 0.172 | 0.172 | 1.00 |
| P08525 | Cytochrome b-c1 complex subunit 8 [OS=Saccharomyces cerevisiae S288c]                      | 85327<br>3 | QCR8;<br>YJL166<br>W            | metabolic process;transport                        | membrane;mitochondrion                       | catalytic activity;transporter activity              | 0.585 | 0.585 | 1.00 |
| P34224 | Uncharacterized protein YBL059W [OS=Saccharomyces cerevisiae S288c]                        | 85222<br>1 | YBL059<br>W;<br>YBL059<br>W     |                                                    | membrane;mitochondrion                       |                                                      | 0.212 | 0.212 | 1.00 |
| P38271 | Protein OPY1 [OS=Saccharomyces cerevisiae S288c]                                           | 85242<br>6 | OPY1;<br>YBR129C                |                                                    | cytoplasm;mitochondrion                      |                                                      | 0.274 | 0.274 | 1.00 |
| P40015 | inositol phosphosphingolipids phospholipase C [OS=Saccharomyces cerevisiae S288c]          | 85673<br>9 | ISC1;<br>YER019<br>W            | metabolic process;response to stimulus             | endoplasmic reticulum;membrane;mitochondrion | catalytic activity;metal ion binding                 | 0.212 | 0.212 | 1.00 |
| Q3E776 | Uncharacterized protein YBR255C-A [OS=Saccharomyces cerevisiae S288c]                      | 85255<br>8 | YBR255C<br>-A;<br>YBR255C<br>-A |                                                    | membrane                                     |                                                      | 0.389 | 0.389 | 1.00 |
| P36163 | mitochondrial metalloendopeptidase OMA1 [OS=Saccharomyces cerevisiae S288c]                | 85396<br>2 | OMA1;<br>YKR087C                | metabolic process                                  | membrane;mitochondrion                       | catalytic activity;metal ion binding                 | 0.245 | 0.245 | 1.00 |
| P38122 | 3-methyl-2-oxobutanoate hydroxymethyltransferase [OS=Saccharomyces cerevisiae S288c]       | 85247<br>4 | ECM31;<br>YBR176<br>W           | metabolic process                                  | mitochondrion                                | catalytic activity                                   | 0.122 | 0.122 | 1.00 |
| P32378 | 4-hydroxybenzoate polyprenyltransferase, mitochondrial [OS=Saccharomyces cerevisiae S288c] | 85577<br>8 | COQ2;<br>YNR041<br>C            | metabolic process;transport                        | membrane;mitochondrion                       | catalytic activity                                   | 0.292 | 0.292 | 1.00 |
| P18900 | hexaprenyl pyrophosphate synthase, mitochondrial [OS=Saccharomyces cerevisiae S288c]       | 85228<br>8 | COQ1;<br>YBR003<br>W            | metabolic process                                  | membrane;mitochondrion                       | catalytic activity;metal ion binding;protein binding | 0.166 | 0.166 | 1.00 |
| Q05779 | Ubiquinone biosynthesis protein COQ9, mitochondrial [OS=Saccharomyces cerevisiae S288c]    | 85089<br>8 | COQ9;<br>YLR201C                | metabolic process                                  | membrane;mitochondrion                       |                                                      | 0.166 | 0.166 | 1.00 |
| P54115 | Magnesium-activated aldehyde dehydrogenase, cytosolic [OS=Saccharomyces cerevisiae S288c]  | 85604<br>4 | ALD6;<br>YPL061<br>W            | metabolic process;response to stimulus             | cytoplasm;cytosol;mitochondrion              | catalytic activity                                   | 0.077 | 0.077 | 1.00 |
| P25348 | 54S ribosomal protein L32, mitochondrial [OS=Saccharomyces cerevisiae S288c]               | 85035<br>9 | MRPL32;<br>YCR003<br>W          | cell organization and biogenesis;metabolic process | membrane;mitochondrion;ribosome              | RNA binding;structural molecule activity             | 0.179 | 0.179 | 1.00 |
| P38341 | MICOS complex subunit MIC12 [OS=Saccharomyces cerevisiae S288c]                            | 85256<br>6 | AIM5;<br>MIC12;<br>YBR262C      | cell organization and biogenesis                   | membrane;mitochondrion                       |                                                      | 0.292 | 0.292 | 1.00 |
| P10174 | cytochrome c oxidase subunit 7 [OS=Saccharomyces cerevisiae S288c]                         | 85529<br>8 | COX7;<br>YMR256<br>C            | metabolic process;transport                        | membrane;mitochondrion                       | catalytic activity;transporter activity              | 1.154 | 1.154 | 1.00 |
| P04039 | Cytochrome c oxidase polypeptide VIII, mitochondrial [OS=Saccharomyces cerevisiae S288c]   | 85111<br>1 | COX8;<br>YLR395C                | metabolic process;transport                        | membrane;mitochondrion                       | catalytic activity;transporter activity              | 0.778 | 0.778 | 1.00 |
| P53219 | Abhydrolase domain-containing protein IMO32 [OS=Saccharomyces cerevisiae S288c]            | 85291<br>9 | IMO32;<br>YGR031<br>W           | metabolic process;transport                        | mitochondrion                                | catalytic activity                                   | 0.116 | 0.116 | 1.00 |
| P00045 | Cytochrome c iso-2 [OS=Saccharomyces cerevisiae S288c]                                     | 85667<br>2 | CYC7;<br>YEL039C                | metabolic process;transport                        | mitochondrion                                | metal ion binding                                    | 0.259 | 0.259 | 1.00 |
| P49954 | probable hydrolase NIT3 [OS=Saccharomyces cerevisiae S288c]                                | 85106<br>5 | NIT3;<br>YLR351C                | metabolic process                                  | cytoplasm;mitochondrion                      | catalytic activity                                   | 0.129 | 0.129 | 1.00 |
| P36064 | COX assembly mitochondrial protein [OS=Saccharomyces cerevisiae S288c]                     | 85372<br>1 | CMC1;<br>YKL137<br>W            | cell organization and biogenesis                   | membrane;mitochondrion                       | metal ion binding                                    | 0.389 | 0.389 | 1.00 |
| P38152 | Tricarboxylate transport protein [OS=Saccharomyces cerevisiae S288c]                       | 85259<br>4 | CTP1;<br>YBR291C                | metabolic process;transport                        | membrane;mitochondrion                       | structural molecule activity;transporter activity    | 0.245 | 0.245 | 1.00 |
| P53724 | 54S ribosomal protein L50, mitochondrial [OS=Saccharomyces cerevisiae S288c]               | 85575<br>6 | MRPL50;<br>YNR022<br>C          | cell organization and biogenesis;metabolic process | mitochondrion;ribosome                       | structural molecule activity                         | 0.585 | 0.585 | 1.00 |

|        |                                                                                                               |        |                  |                                                                                               |                                                |                                                                                 |        |        |      |
|--------|---------------------------------------------------------------------------------------------------------------|--------|------------------|-----------------------------------------------------------------------------------------------|------------------------------------------------|---------------------------------------------------------------------------------|--------|--------|------|
|        | S288c]                                                                                                        |        |                  |                                                                                               |                                                |                                                                                 |        |        |      |
| Q06698 | Putative ATP-dependent RNA helicase YLR419W [OS=Saccharomyces cerevisiae S288c]                               | 851137 | YLR419W; YLR419W | metabolic process                                                                             | cytoplasm;mitochondrion;nucleus                | catalytic activity;nucleotide binding;protein binding;RNA binding               | 0.027  | 0.027  | 1.00 |
| P25578 | CDP-diacylglycerol--glycerol-3-phosphate 3-phosphatidyltransferase [OS=Saccharomyces cerevisiae S288c]        | 850352 | PGS1; YCL004W    | metabolic process                                                                             | mitochondrion                                  | catalytic activity;nucleotide binding                                           | 0.083  | 0.083  | 1.00 |
| Q04487 | Mitochondrial inner membrane protein SHH3 [OS=Saccharomyces cerevisiae S288c]                                 | 855145 | SHH3; YMR118C    | metabolic process                                                                             | membrane;mitochondrion                         | catalytic activity;metal ion binding                                            | 0.194  | 0.194  | 1.00 |
| P20967 | 2-oxoglutarate dehydrogenase, mitochondrial [OS=Saccharomyces cerevisiae S288c]                               | 854681 | KGD1; YIL125W    | metabolic process                                                                             | cytosol;mitochondrion;organelle lumen          | catalytic activity                                                              | 13.785 | 14.441 | 1.05 |
| P32843 | Mitochondrial escape protein 2 [OS=Saccharomyces cerevisiae S288c]                                            | 855348 | YME2; YMR302C    | cell organization and biogenesis;metabolic process                                            | membrane;mitochondrion                         | nucleotide binding;RNA binding                                                  | 2.227  | 2.36   | 1.06 |
| P16387 | Pyruvate dehydrogenase E1 component subunit alpha, mitochondrial [OS=Saccharomyces cerevisiae S288c]          | 856925 | PDA1; YER178W    | cell growth;metabolic process                                                                 | mitochondrion;organelle lumen                  | catalytic activity                                                              | 11.496 | 12.46  | 1.08 |
| P09440 | C-1-tetrahydrofolate synthase, mitochondrial [OS=Saccharomyces cerevisiae S288c]                              | 852378 | MIS1; YBR084W    | metabolic process                                                                             | cytosol;mitochondrion                          | catalytic activity;nucleotide binding                                           | 0.762  | 0.829  | 1.09 |
| Q01852 | Mitochondrial import inner membrane translocase subunit TIM44 [OS=Saccharomyces cerevisiae S288c]             | 854790 | TIM44; YIL022W   | transport                                                                                     | membrane;mitochondrion                         | nucleotide binding;protein binding                                              | 5.898  | 6.43   | 1.09 |
| P07275 | Delta-1-pyrroline-5-carboxylate dehydrogenase, mitochondrial [OS=Saccharomyces cerevisiae S288c]              | 856432 | PUT2; YHR037W    | metabolic process                                                                             | membrane;mitochondrion;organelle lumen         | catalytic activity                                                              | 3.977  | 4.337  | 1.09 |
| P07257 | Cytochrome b-c1 complex subunit 2, mitochondrial [OS=Saccharomyces cerevisiae S288c]                          | 856321 | QCR2; YPR191W    | metabolic process;transport                                                                   | membrane;mitochondrion                         | catalytic activity;metal ion binding;protein binding;transporter activity       | 27.943 | 30.623 | 1.10 |
| P36013 | NAD-dependent malic enzyme, mitochondrial [OS=Saccharomyces cerevisiae S288c]                                 | 853839 | MAE1; YKL029C    | metabolic process                                                                             | mitochondrion;organelle lumen                  | catalytic activity;metal ion binding;nucleotide binding                         | 1.371  | 1.512  | 1.10 |
| P00927 | Threonine dehydratase, mitochondrial [OS=Saccharomyces cerevisiae S288c]                                      | 856819 | ILV1; YER086W    | metabolic process                                                                             | cytoplasm;mitochondrion                        | catalytic activity                                                              | 1.285  | 1.424  | 1.11 |
| P38077 | ATP synthase subunit gamma, mitochondrial [OS=Saccharomyces cerevisiae S288c]                                 | 852327 | ATP3; YBR039W    | metabolic process;transport                                                                   | membrane;mitochondrion                         | catalytic activity;transporter activity                                         | 11.328 | 12.689 | 1.12 |
| P39925 | Mitochondrial respiratory chain complexes assembly protein AFG3 [OS=Saccharomyces cerevisiae S288c]           | 856737 | AFG3; YER017C    | cell organization and biogenesis;metabolic process;response to stimulus;transport             | membrane;mitochondrion                         | catalytic activity;metal ion binding;nucleotide binding;protein binding         | 0.734  | 0.823  | 1.12 |
| P48015 | Aminomethyltransferase, mitochondrial [OS=Saccharomyces cerevisiae S288c]                                     | 851582 | GCV1; YDR019C    | metabolic process                                                                             | mitochondrion                                  | catalytic activity;protein binding                                              | 6.406  | 7.185  | 1.12 |
| P32898 | Mitochondrial presequence protease [OS=Saccharomyces cerevisiae S288c]                                        | 852041 | CYM1; YDR430C    | metabolic process                                                                             | mitochondrion                                  | catalytic activity;metal ion binding                                            | 0.45   | 0.505  | 1.12 |
| P47127 | Altered inheritance of mitochondria protein 24, mitochondrial [OS=Saccharomyces cerevisiae S288c]             | 853543 | AIM24; YJR080C   | cell organization and biogenesis                                                              | mitochondrion                                  |                                                                                 | 1.807  | 2.039  | 1.13 |
| P38071 | Enoyl-[acyl-carrier protein] reductase [NADPH, B-specific], mitochondrial [OS=Saccharomyces cerevisiae S288c] | 852314 | ETR1; YBR026C    | metabolic process                                                                             | mitochondrion;organelle lumen                  | catalytic activity;DNA binding;metal ion binding                                | 4.926  | 5.579  | 1.13 |
| POCS90 | Heat shock protein SSC1, mitochondrial [OS=Saccharomyces cerevisiae S288c]                                    | 853503 | SSC1; YJR045C    | cell organization and biogenesis;metabolic process;regulation of biological process;transport | membrane;mitochondrion;nucleus;organelle lumen | catalytic activity;enzyme regulator activity;nucleotide binding;protein binding | 34.938 | 39.842 | 1.14 |

|        |                                                                                                                      |        |                  |                                                                                                  |                                                  |                                                                         |        |        |      |
|--------|----------------------------------------------------------------------------------------------------------------------|--------|------------------|--------------------------------------------------------------------------------------------------|--------------------------------------------------|-------------------------------------------------------------------------|--------|--------|------|
| P09457 | ATP synthase subunit 5, mitochondrial [OS=Saccharomyces cerevisiae S288c]                                            | 851892 | ATP5; YDR298C    | metabolic process;transport                                                                      | membrane;mitochondrion                           | catalytic activity;transporter activity                                 | 9      | 10.365 | 1.15 |
| Q08822 | Probable electron transfer flavoprotein-ubiquinone oxidoreductase, mitochondrial [OS=Saccharomyces cerevisiae S288c] | 854538 | CIR2; YOR356W    | metabolic process;transport                                                                      | membrane;mitochondrion                           | catalytic activity;metal ion binding;nucleotide binding                 | 1.873  | 2.162  | 1.15 |
| Q08179 | Mitochondrial distribution and morphology protein 38 [OS=Saccharomyces cerevisiae S288c]                             | 854130 | MDM38; YOL027C   | cell organization and biogenesis;cellular homeostasis;regulation of biological process;transport | membrane;mitochondrion                           |                                                                         | 3.732  | 4.309  | 1.15 |
| P33311 | ATP-dependent permease MDL2, mitochondrial [OS=Saccharomyces cerevisiae S288c]                                       | 855858 | MDL2; YPL270W    | response to stimulus;transport                                                                   | membrane;mitochondrion                           | catalytic activity;nucleotide binding;transporter activity              | 0.535  | 0.619  | 1.16 |
| P40215 | External NADH-ubiquinone oxidoreductase 1, mitochondrial [OS=Saccharomyces cerevisiae S288c]                         | 855176 | NDE1; YMR145C    | metabolic process                                                                                | mitochondrion                                    | catalytic activity;nucleotide binding                                   | 4.367  | 5.078  | 1.16 |
| Q08023 | Protein FMP25, mitochondrial [OS=Saccharomyces cerevisiae S288c]                                                     | 850766 | FMP25; YLR077W   | cell organization and biogenesis                                                                 | membrane;mitochondrion                           |                                                                         | 0.719  | 0.84   | 1.17 |
| P21954 | Isocitrate dehydrogenase [NADP], mitochondrial [OS=Saccharomyces cerevisiae S288c]                                   | 851493 | IDP1; YDL066W    | metabolic process                                                                                | mitochondrion                                    | catalytic activity;metal ion binding;nucleotide binding;protein binding | 26.123 | 30.623 | 1.17 |
| P37292 | Serine hydroxymethyltransferase, mitochondrial [OS=Saccharomyces cerevisiae S288c]                                   | 852565 | SHM1; YBR263W    | metabolic process                                                                                | mitochondrion                                    | catalytic activity                                                      | 5.136  | 6.055  | 1.18 |
| P53206 | putative cysteine synthase [OS=Saccharomyces cerevisiae S288c]                                                       | 852895 | YGR012W; YGR012W | metabolic process                                                                                | mitochondrion                                    | catalytic activity                                                      | 0.978  | 1.154  | 1.18 |
| P43567 | alanine-glyoxylate aminotransferase 1 [OS=Saccharomyces cerevisiae S288c]                                            | 850514 | AGX1; YFL030W    | metabolic process                                                                                | cytosol;mitochondrion                            | catalytic activity                                                      | 1.154  | 1.371  | 1.19 |
| P00924 | Enolase 1 [OS=Saccharomyces cerevisiae S288c]                                                                        | 853169 | ENO1; YGR254W    | metabolic process;regulation of biological process                                               | cytoplasm;cytosol;membrane;mitochondrion;vacuole | catalytic activity;metal ion binding;protein binding                    | 0.711  | 0.848  | 1.19 |
| P32317 | Protein AFG1 [OS=Saccharomyces cerevisiae S288c]                                                                     | 856658 | AFG1; YEL052W    | cell organization and biogenesis;metabolic process;response to stimulus;transport                | membrane;mitochondrion                           | catalytic activity;nucleotide binding                                   | 0.711  | 0.848  | 1.19 |
| P32787 | Mitochondrial genome maintenance protein MGM101 [OS=Saccharomyces cerevisiae S288c]                                  | 853609 | MGM101; YJR144W  | cell organization and biogenesis;metabolic process;response to stimulus                          | chromosome;mitochondrion                         | DNA binding                                                             | 1.976  | 2.36   | 1.19 |
| P30902 | ATP synthase subunit d, mitochondrial [OS=Saccharomyces cerevisiae S288c]                                            | 853853 | ATP7; YKL016C    | metabolic process;transport                                                                      | membrane;mitochondrion                           | catalytic activity;transporter activity                                 | 4.179  | 5.105  | 1.22 |
| P54783 | D-arabinono-1,4-lactone oxidase [OS=Saccharomyces cerevisiae S288c]                                                  | 854888 | ALO1; YML086C    | metabolic process;response to stimulus                                                           | membrane;mitochondrion                           | catalytic activity;nucleotide binding                                   | 2.415  | 2.981  | 1.23 |
| P40047 | Aldehyde dehydrogenase 5, mitochondrial [OS=Saccharomyces cerevisiae S288c]                                          | 856804 | ALD5; YER073W    | metabolic process                                                                                | mitochondrion;organelle lumen                    | catalytic activity                                                      | 1.581  | 1.955  | 1.24 |
| P40053 | Altered inheritance of mitochondria protein 9, mitochondrial [OS=Saccharomyces cerevisiae S288c]                     | 856813 | AIM9; YER080W    |                                                                                                  | mitochondrion                                    |                                                                         | 1.938  | 2.403  | 1.24 |
| Q06668 | Methyltransferase OMS1, mitochondrial [OS=Saccharomyces cerevisiae S288c]                                            | 851911 | OMS1; YDR316W    | metabolic process                                                                                | membrane;mitochondrion                           | catalytic activity                                                      | 0.389  | 0.484  | 1.24 |
| P08466 | mitochondrial nuclease [OS=Saccharomyces cerevisiae S288c]                                                           | 853222 | NUC1; YJL208C    | cell death;metabolic process                                                                     | membrane;mitochondrion;nucleus                   | catalytic activity;metal ion binding                                    | 1.069  | 1.336  | 1.25 |
| P04806 | Hexokinase-1 [OS=Saccharomyces cerevisiae S288c]                                                                     | 850614 | HXK1; YFR053C    | cellular homeostasis;metabolic process;transport                                                 | cytoplasm;cytosol;mitochondrion                  | catalytic activity;nucleotide binding                                   | 0.487  | 0.61   | 1.25 |
| P32860 | NifU-like protein, mitochondrial [OS=Saccharomyces cerevisiae S288c]                                                 | 853826 | NFU1; YKL040C    | cell organization and biogenesis;cellular homeostasis;metabolic process                          | mitochondrion;organelle lumen                    | metal ion binding                                                       | 1.371  | 1.738  | 1.27 |
| P49367 | Homoaconitase, mitochondrial [OS=Saccharomyces cerevisiae S288c]                                                     | 851820 | LYS4; YDR234W    | metabolic process                                                                                | mitochondrion                                    | catalytic activity;metal ion binding;protein                            | 0.73   | 0.931  | 1.28 |

|        |                                                                                                    |        |                   |                                                                                                                                       |                                                        |                                                                           |        |        |      |
|--------|----------------------------------------------------------------------------------------------------|--------|-------------------|---------------------------------------------------------------------------------------------------------------------------------------|--------------------------------------------------------|---------------------------------------------------------------------------|--------|--------|------|
|        |                                                                                                    |        |                   |                                                                                                                                       |                                                        | binding                                                                   |        |        |      |
| P37293 | N-terminal acetyltransferase 2 [OS=Saccharomyces cerevisiae S288c]                                 | 853050 | NAT2; YGR147C     | metabolic process                                                                                                                     | cytoplasm;mitochondrion                                | catalytic activity                                                        | 0.73   | 0.931  | 1.28 |
| P36775 | Lon protease homolog, mitochondrial [OS=Saccharomyces cerevisiae S288c]                            | 852259 | PIM1; YBL022C     | cell organization and biogenesis;metabolic process;regulation of biological process;response to stimulus                              | cytoplasm;mitochondrion;organelle lumen                | catalytic activity;DNA binding;nucleotide binding;RNA binding             | 0.537  | 0.685  | 1.28 |
| P25719 | Peptidyl-prolyl cis-trans isomerase C, mitochondrial [OS=Saccharomyces cerevisiae S288c]           | 854897 | CPR3; YML078W     | cell death;metabolic process                                                                                                          | mitochondrion;organelle lumen                          | catalytic activity                                                        | 1.512  | 1.929  | 1.28 |
| P38127 | mitochondrial carrier protein RIM2 [OS=Saccharomyces cerevisiae S288c]                             | 852491 | RIM2; YBR192W     | cell organization and biogenesis;metabolic process;transport                                                                          | membrane;mitochondrion                                 | structural molecule activity;transporter activity                         | 0.778  | 0.995  | 1.28 |
| Q02981 | ABC1 family protein YPL109C, mitochondrial [OS=Saccharomyces cerevisiae S288c]                     | 855995 | YPL109C ; YPL109C |                                                                                                                                       | mitochondrion                                          |                                                                           | 0.259  | 0.334  | 1.29 |
| P04840 | Mitochondrial outer membrane protein porin 1 [OS=Saccharomyces cerevisiae S288c]                   | 855669 | POR1; YNL055C     | cell death;cell organization and biogenesis;cellular homeostasis;regulation of biological process;transport                           | cytoplasm;membrane;mitochondrion                       | transporter activity                                                      | 17.33  | 22.357 | 1.29 |
| P33310 | ATP-dependent permease MDL1, mitochondrial [OS=Saccharomyces cerevisiae S288c]                     | 850885 | MDL1; YLR188W     | transport                                                                                                                             | membrane;mitochondrion                                 | catalytic activity;nucleotide binding;transporter activity                | 0.274  | 0.354  | 1.29 |
| P36060 | NADH-cytochrome b5 reductase 2 [OS=Saccharomyces cerevisiae S288c]                                 | 853707 | MCR1; YKL150W     | metabolic process;response to stimulus                                                                                                | membrane;mitochondrion                                 | catalytic activity;protein binding                                        | 13.384 | 17.33  | 1.29 |
| P53598 | Succinyl-CoA ligase [ADP-forming] subunit alpha, mitochondrial [OS=Saccharomyces cerevisiae S288c] | 854310 | LSC1; YOR142W     | metabolic process                                                                                                                     | cytosol;mitochondrion                                  | catalytic activity;nucleotide binding                                     | 9      | 11.743 | 1.30 |
| P04710 | ADP,ATP carrier protein 1 [OS=Saccharomyces cerevisiae S288c]                                      | 855078 | AAC1; YMR056C     | metabolic process;transport                                                                                                           | cytosol;membrane;mitochondrion                         | structural molecule activity;transporter activity                         | 6.848  | 9      | 1.31 |
| P32454 | Aminopeptidase 2, mitochondrial [OS=Saccharomyces cerevisiae S288c]                                | 853699 | APE2; YKL157W     | metabolic process                                                                                                                     | cytoplasm;extracellular;membrane;mitochondrion;nucleus | catalytic activity;metal ion binding                                      | 1.049  | 1.383  | 1.32 |
| P15424 | ATP-dependent RNA helicase MSS116, mitochondrial [OS=Saccharomyces cerevisiae S288c]               | 851775 | MSS116; YDR194C   | metabolic process;regulation of biological process                                                                                    | mitochondrion;organelle lumen                          | catalytic activity;nucleotide binding;RNA binding                         | 0.506  | 0.668  | 1.32 |
| P07256 | Cytochrome b-c1 complex subunit 1, mitochondrial [OS=Saccharomyces cerevisiae S288c]               | 852235 | COR1; YBL045C     | metabolic process;transport                                                                                                           | membrane;mitochondrion                                 | catalytic activity;metal ion binding;protein binding;transporter activity | 8.183  | 10.86  | 1.33 |
| P36534 | 54S ribosomal protein L40, mitochondrial [OS=Saccharomyces cerevisiae S288c]                       | 855930 | MRPL40; YPL173W   | cell organization and biogenesis;metabolic process                                                                                    | mitochondrion;ribosome                                 | protein binding;structural molecule activity                              | 0.585  | 0.778  | 1.33 |
| P28625 | Protein YIM1 [OS=Saccharomyces cerevisiae S288c]                                                   | 855183 | YIM1; YMR152W     | metabolic process;response to stimulus                                                                                                | cytoplasm;endoplasmic reticulum;mitochondrion          | catalytic activity;metal ion binding                                      | 0.624  | 0.833  | 1.33 |
| P36521 | 54S ribosomal protein L11, mitochondrial [OS=Saccharomyces cerevisiae S288c]                       | 851325 | MRPL11; YDL202W   | cell organization and biogenesis;metabolic process                                                                                    | mitochondrion;ribosome                                 | structural molecule activity                                              | 0.624  | 0.833  | 1.33 |
| P02992 | elongation factor Tu, mitochondrial [OS=Saccharomyces cerevisiae S288c]                            | 854359 | TUF1; YOR187W     | cell organization and biogenesis;metabolic process                                                                                    | mitochondrion                                          | catalytic activity;nucleotide binding;RNA binding                         | 6.667  | 9      | 1.35 |
| P32939 | GTP-binding protein ypt7 [OS=Saccharomyces cerevisiae S288c]                                       | 855012 | YPT7; YML001W     | cell communication;cell organization and biogenesis;metabolic process;regulation of biological process;response to stimulus;transport | cytosol;endosome;membrane;mitochondrion;vacuole        | catalytic activity;nucleotide binding;protein binding                     | 0.848  | 1.154  | 1.36 |
| P36525 | 54S ribosomal protein L24, mitochondrial [OS=Saccharomyces cerevisiae S288c]                       | 855231 | MRPL24; YMR193W   | cell organization and biogenesis;metabolic process                                                                                    | mitochondrion;ribosome                                 | RNA binding;structural molecule activity                                  | 0.848  | 1.154  | 1.36 |
| P39987 | Heat shock protein SSC3, mitochondrial [OS=Saccharomyces cerevisiae S288c]                         | 856682 | ECM10; YEL030W    | cell organization and biogenesis;metabolic process;transport                                                                          | mitochondrion                                          | nucleotide binding;protein binding                                        | 1.198  | 1.637  | 1.37 |
| Q05931 | Heat shock protein Ssq1, mitochondrial [OS=Saccharomyces cerevisiae S288c]                         | 851084 | SSQ1; YLR369W     | cell organization and biogenesis;metabolic process                                                                                    | mitochondrion;organelle lumen                          | nucleotide binding;protein binding                                        | 0.496  | 0.679  | 1.37 |

|        |                                                                                                                                                       |            |                                      |                                                                                               |                                     |                                                                   |       |       |      |
|--------|-------------------------------------------------------------------------------------------------------------------------------------------------------|------------|--------------------------------------|-----------------------------------------------------------------------------------------------|-------------------------------------|-------------------------------------------------------------------|-------|-------|------|
| Q12298 | uncharacterized ABC transporter ATP-binding protein YDR061W [OS=Saccharomyces cerevisiae S288c]                                                       | 85163<br>3 | YDR061<br>W;<br>YDR061<br>W          |                                                                                               | mitochondrion                       | catalytic activity;nucleotide binding                             | 0.194 | 0.266 | 1.37 |
| P53266 | Cytochrome oxidase assembly protein SHY1 [OS=Saccharomyces cerevisiae S288c]                                                                          | 85300<br>9 | SHY1;<br>YGR112<br>W                 | cell organization and biogenesis                                                              | membrane;mitochondrion              | protein binding                                                   | 0.978 | 1.346 | 1.38 |
| P32799 | Cytochrome c oxidase subunit 6A, mitochondrial [OS=Saccharomyces cerevisiae S288c]                                                                    | 85268<br>4 | COX13;<br>YGL191<br>W                | cell organization and biogenesis;metabolic process;regulation of biological process;transport | membrane;mitochondrion              | catalytic activity;enzyme regulator activity;transporter activity | 2.162 | 2.981 | 1.38 |
| Q06567 | ABC1 family protein MCP2 [OS=Saccharomyces cerevisiae S288c]                                                                                          | 85095<br>5 | YLR253<br>W;<br>MCP2;<br>YLR253<br>W | cell organization and biogenesis                                                              | membrane;mitochondrion              |                                                                   | 0.218 | 0.301 | 1.38 |
| P21375 | Fumarate reductase 2 [OS=Saccharomyces cerevisiae S288c]                                                                                              | 85351<br>0 | OSM1;<br>YJR051<br>W                 | metabolic process                                                                             | endoplasmic reticulum;mitochondrion | catalytic activity;nucleotide binding                             | 0.25  | 0.346 | 1.38 |
| P36066 | Protein MRG3-like [OS=Saccharomyces cerevisiae S288c]                                                                                                 | 85372<br>5 | YKL133C<br>;<br>YKL133C              | metabolic process                                                                             | membrane;mitochondrion              | protein binding                                                   | 0.241 | 0.334 | 1.39 |
| P47052 | succinate dehydrogenase [ubiquinone] flavoprotein subunit 2, mitochondrial [OS=Saccharomyces cerevisiae S288c]                                        | 85340<br>5 | YJL045<br>W;<br>YJL045<br>W          | metabolic process;transport                                                                   | membrane;mitochondrion              | catalytic activity;nucleotide binding                             | 2.695 | 3.739 | 1.39 |
| P34231 | Uncharacterized protein YKL187C [OS=Saccharomyces cerevisiae S288c]                                                                                   | 85364<br>8 | FAT3;<br>YKL187C<br>;<br>YKL187C     | cell organization and biogenesis;transport                                                    | membrane;mitochondrion              |                                                                   | 0.304 | 0.425 | 1.40 |
| P36101 | tRNA threonylcarbamoyladenosine dehydratase 2 [OS=Saccharomyces cerevisiae S288c]                                                                     | 85384<br>1 | TCD2;<br>YKL027<br>W;<br>YKL027<br>W | metabolic process                                                                             | cytosol;membrane;mitochondrion      | catalytic activity;nucleotide binding                             | 0.334 | 0.468 | 1.40 |
| P47015 | Altered inheritance of mitochondria protein 23, mitochondrial [OS=Saccharomyces cerevisiae S288c]                                                     | 85331<br>0 | AIM23;<br>YJL131C                    | metabolic process                                                                             | mitochondrion                       | RNA binding                                                       | 0.35  | 0.492 | 1.41 |
| P53326 | Uncharacterized protein YGR266W [OS=Saccharomyces cerevisiae S288c]                                                                                   | 85318<br>2 | YGR266<br>W;<br>YGR266<br>W          |                                                                                               | membrane;mitochondrion              |                                                                   | 0.369 | 0.52  | 1.41 |
| P40012 | protoporphyrinogen oxidase [OS=Saccharomyces cerevisiae S288c]                                                                                        | 85673<br>3 | HEM14;<br>YER014<br>W                | metabolic process                                                                             | membrane;mitochondrion              | catalytic activity                                                | 0.947 | 1.336 | 1.41 |
| P25605 | Acetolactate synthase small subunit, mitochondrial [OS=Saccharomyces cerevisiae S288c]                                                                | 85034<br>8 | ILV6;<br>YCL009C                     | metabolic process;regulation of biological process                                            | mitochondrion                       | catalytic activity;enzyme regulator activity                      | 1.976 | 2.793 | 1.41 |
| P50110 | Sorting assembly machinery 37 kDa subunit [OS=Saccharomyces cerevisiae S288c]                                                                         | 85508<br>2 | SAM37;<br>YMR060<br>C                | cell organization and biogenesis;transport                                                    | membrane;mitochondrion              | protein binding                                                   | 0.389 | 0.551 | 1.42 |
| P43617 | Uncharacterized mitochondrial carrier YFR045W [OS=Saccharomyces cerevisiae S288c]                                                                     | 85060<br>6 | YFR045<br>W;<br>YFR045<br>W          | metabolic process;transport                                                                   | membrane;mitochondrion              | structural molecule activity;transporter activity                 | 0.413 | 0.585 | 1.42 |
| P38300 | Inner membrane mitoribosome receptor MBA1, mitochondrial [OS=Saccharomyces cerevisiae S288c]                                                          | 85248<br>3 | MBA1;<br>YBR185C                     | cell organization and biogenesis;regulation of biological process                             | membrane;mitochondrion              |                                                                   | 0.413 | 0.585 | 1.42 |
| P38825 | Protein TOM71 [OS=Saccharomyces cerevisiae S288c]                                                                                                     | 85651<br>7 | TOM71;<br>YHR117<br>W                | transport                                                                                     | membrane;mitochondrion              | protein binding;transporter activity                              | 0.425 | 0.604 | 1.42 |
| P32904 | 54S ribosomal protein L6, mitochondrial [OS=Saccharomyces cerevisiae S288c]                                                                           | 85655<br>2 | MRPL6;<br>YHR147<br>C                | cell organization and biogenesis;metabolic process                                            | mitochondrion;ribosome              | RNA binding;structural molecule activity                          | 0.54  | 0.778 | 1.44 |
| Q02776 | Mitochondrial import inner membrane translocase subunit TIM50 [OS=Saccharomyces cerevisiae S288c]                                                     | 85604<br>2 | TIM50;<br>YPL063<br>W                | cell organization and biogenesis;metabolic process;transport                                  | membrane;mitochondrion              | catalytic activity;protein binding;transporter activity           | 6.197 | 9     | 1.45 |
| P37298 | Succinate dehydrogenase [ubiquinone] cytochrome b small subunit, mitochondrial [OS=Saccharomyces cerevisiae S288c]                                    | 85175<br>8 | SDH4;<br>YDR178<br>W                 | metabolic process;transport                                                                   | membrane;mitochondrion              | catalytic activity;metal ion binding                              | 1.783 | 2.594 | 1.45 |
| P19262 | Dihydropyridyllysine-residue succinyltransferase component of 2-oxoglutarate dehydrogenase complex, mitochondrial [OS=Saccharomyces cerevisiae S288c] | 85172<br>6 | KGD2;<br>YDR148<br>C                 | cell organization and biogenesis;metabolic process                                            | mitochondrion                       | catalytic activity;protein binding                                | 3.062 | 4.484 | 1.46 |
| Q03201 | 37S ribosomal protein S10, mitochondrial [OS=Saccharomyces cerevisiae S288c]                                                                          | 85161<br>1 | RSM10;<br>YDR041<br>W                | cell organization and biogenesis;metabolic process                                            | mitochondrion;ribosome              | structural molecule activity                                      | 0.701 | 1.031 | 1.47 |



|        |                                                                                             |        |                 |                                                                                     |                                         |                                                       |       |       |      |
|--------|---------------------------------------------------------------------------------------------|--------|-----------------|-------------------------------------------------------------------------------------|-----------------------------------------|-------------------------------------------------------|-------|-------|------|
|        | S288c]                                                                                      |        |                 |                                                                                     |                                         |                                                       |       |       |      |
| Q12029 | Probable mitochondrial transport protein fsf1 [OS=Saccharomyces cerevisiae S288c]           | 854445 | FSF1; YOR271C   | transport                                                                           | membrane;mitochondrion                  | transporter activity                                  | 1.336 | 1.976 | 1.48 |
| P32332 | Mitochondrial oxaloacetate transport protein [OS=Saccharomyces cerevisiae S288c]            | 853739 | OAC1; YKL120W   | metabolic process;transport                                                         | membrane;mitochondrion                  | structural molecule activity;transporter activity     | 1.448 | 2.162 | 1.49 |
| P32266 | Dynamin-like GTPase MGM1, mitochondrial [OS=Saccharomyces cerevisiae S288c]                 | 854386 | MGM1; YOR211C   | cell organization and biogenesis                                                    | membrane;mitochondrion                  | catalytic activity;nucleotide binding;protein binding | 0.086 | 0.131 | 1.52 |
| P28817 | 3-hydroxyisobutyryl-CoA hydrolase, mitochondrial [OS=Saccharomyces cerevisiae S288c]        | 851606 | EHD3; YDR036C   | metabolic process                                                                   | mitochondrion                           | catalytic activity                                    | 0.487 | 0.743 | 1.53 |
| P39952 | Mitochondrial inner membrane protein OXA1 [OS=Saccharomyces cerevisiae S288c]               | 856898 | OXA1; YER154W   | cell organization and biogenesis;transport                                          | membrane;mitochondrion                  | transporter activity                                  | 1.738 | 2.652 | 1.53 |
| P11325 | Leucine--tRNA ligase, mitochondrial [OS=Saccharomyces cerevisiae S288c]                     | 851098 | NAM2; YLR382C   | cell organization and biogenesis;metabolic process;regulation of biological process | cytosol;mitochondrion;organelle lumen   | catalytic activity;nucleotide binding;RNA binding     | 0.078 | 0.12  | 1.54 |
| P21560 | Protein CBP3, mitochondrial [OS=Saccharomyces cerevisiae S288c]                             | 855886 | CBP3; YPL215W   | cell organization and biogenesis;regulation of biological process                   | membrane;mitochondrion;ribosome         |                                                       | 0.557 | 0.859 | 1.54 |
| P32445 | Single-stranded DNA-binding protein RIM1, mitochondrial [OS=Saccharomyces cerevisiae S288c] | 850395 | RIM1; YCR028C-A | cell organization and biogenesis;metabolic process;regulation of biological process | mitochondrion                           | DNA binding                                           | 1.154 | 1.783 | 1.55 |
| P25349 | Flavoprotein-like protein YCP4 [OS=Saccharomyces cerevisiae S288c]                          | 850360 | YCP4; YCR004C   | metabolic process;regulation of biological process                                  | cytoplasm;membrane;mitochondrion        | catalytic activity;nucleotide binding;protein binding | 5.813 | 9     | 1.55 |
| P53166 | ATP-dependent RNA helicase mrh4, mitochondrial [OS=Saccharomyces cerevisiae S288c]          | 852816 | MRH4; YGL064C   | cell organization and biogenesis;metabolic process                                  | mitochondrion;organelle lumen           | catalytic activity;nucleotide binding;RNA binding     | 0.145 | 0.225 | 1.55 |
| P42900 | Sigma-like sequence protein 1, mitochondrial [OS=Saccharomyces cerevisiae S288c]            | 850830 | SLS1; YLR139C   | cell organization and biogenesis;metabolic process                                  | membrane;mitochondrion                  | protein binding                                       | 0.125 | 0.194 | 1.55 |
| P07236 | Threonine--tRNA ligase, mitochondrial [OS=Saccharomyces cerevisiae S288c]                   | 853640 | MST1; YKL194C   | metabolic process                                                                   | cytoplasm;mitochondrion;organelle lumen | catalytic activity;nucleotide binding;RNA binding     | 0.15  | 0.233 | 1.55 |
| P39518 | Long-chain-fatty-acid--CoA ligase 2 [OS=Saccharomyces cerevisiae S288c]                     | 856734 | FAA2; YER015W   | metabolic process;transport                                                         | cytoplasm;mitochondrion                 | catalytic activity;nucleotide binding                 | 0.455 | 0.708 | 1.56 |
| P25039 | Elongation factor G, mitochondrial [OS=Saccharomyces cerevisiae S288c]                      | 850758 | MEF1; YLR069C   | cell organization and biogenesis;metabolic process                                  | cytosol;mitochondrion                   | catalytic activity;nucleotide binding;RNA binding     | 0.207 | 0.326 | 1.57 |
| P38702 | mitochondrial carrier protein LEU5 [OS=Saccharomyces cerevisiae S288c]                      | 856391 | LEU5; YHR002W   | metabolic process;transport                                                         | membrane;mitochondrion                  | structural molecule activity;transporter activity     | 0.212 | 0.334 | 1.58 |
| Q06236 | Mitochondrial inner membrane protein SHH4 [OS=Saccharomyces cerevisiae S288c]               | 850861 | SHH4; YLR164W   | metabolic process                                                                   | membrane;mitochondrion                  | catalytic activity;metal ion binding                  | 1.371 | 2.162 | 1.58 |
| P38797 | Protein phosphatase 2C homolog 7, mitochondrial [OS=Saccharomyces cerevisiae S288c]         | 856475 | PTC7; YHR076W   | metabolic process                                                                   | mitochondrion                           | catalytic activity;metal ion binding;protein binding  | 0.233 | 0.369 | 1.58 |
| P15179 | Aspartate--tRNA ligase, mitochondrial [OS=Saccharomyces cerevisiae S288c]                   | 856000 | MSD1; YPL104W   | metabolic process                                                                   | cytoplasm;mitochondrion;organelle lumen | catalytic activity;nucleotide binding                 | 0.239 | 0.379 | 1.59 |
| P36520 | 54S ribosomal protein L10, mitochondrial [OS=Saccharomyces cerevisiae S288c]                | 855436 | MRPL10; YNL284C | cell organization and biogenesis;metabolic process                                  | mitochondrion;ribosome                  | structural molecule activity                          | 0.245 | 0.389 | 1.59 |
| Q08968 | UPF0061 protein FMP40 [OS=Saccharomyces cerevisiae S288c]                                   | 855879 | FMP40; YPL222W  |                                                                                     | mitochondrion                           | protein binding                                       | 0.917 | 1.462 | 1.59 |
| P18496 | Mitochondrial ATPase complex subunit ATP10 [OS=Saccharomyces cerevisiae S288c]              | 851109 | ATP10; YLR393W  | cell organization and biogenesis                                                    | cytoplasm;membrane;mitochondrion        | protein binding                                       | 0.259 | 0.413 | 1.59 |
| P27697 | Atypical kinase COQ8, mitochondrial [OS=Saccharomyces cerevisiae S288c]                     | 852758 | COQ8; YGL119W   | metabolic process                                                                   | membrane;mitochondrion;organelle lumen  | catalytic activity;nucleotide binding                 | 0.283 | 0.453 | 1.60 |

|        |                                                                                                   |        |                         |                                                                                                                               |                                |                                                                      |       |       |      |
|--------|---------------------------------------------------------------------------------------------------|--------|-------------------------|-------------------------------------------------------------------------------------------------------------------------------|--------------------------------|----------------------------------------------------------------------|-------|-------|------|
| P40035 | Mitochondrial phosphate carrier protein 2 [OS=Saccharomyces cerevisiae S288c]                     | 856779 | PIC2; YER053C           | cellular homeostasis;metabolic process;transport                                                                              | membrane;mitochondrion         | structural molecule activity;transporter activity                    | 0.833 | 1.336 | 1.60 |
| P46681 | D-lactate dehydrogenase [cytochrome] 2, mitochondrial [OS=Saccharomyces cerevisiae S288c]         | 851376 | DLD2; YDL178W           | metabolic process                                                                                                             | mitochondrion;organelle lumen  | catalytic activity;nucleotide binding;protein binding                | 0.682 | 1.102 | 1.62 |
| P05626 | ATP synthase subunit 4, mitochondrial [OS=Saccharomyces cerevisiae S288c]                         | 856027 | ATP4; YPL078C           | cell organization and biogenesis;metabolic process;transport                                                                  | membrane;mitochondrion         | catalytic activity;transporter activity                              | 3.084 | 4.995 | 1.62 |
| Q03246 | 37S ribosomal protein S17, mitochondrial [OS=Saccharomyces cerevisiae S288c]                      | 855226 | MRPS17; YMR188C         | cell differentiation;cell organization and biogenesis;metabolic process                                                       | mitochondrion;ribosome         | RNA binding;structural molecule activity                             | 0.389 | 0.638 | 1.64 |
| Q06678 | 54S ribosomal protein L35, mitochondrial [OS=Saccharomyces cerevisiae S288c]                      | 851921 | MRPL35; YDR322W         | cell organization and biogenesis;metabolic process                                                                            | mitochondrion;ribosome         | structural molecule activity                                         | 0.425 | 0.701 | 1.65 |
| P53311 | Mitochondrial pyruvate carrier 3 [OS=Saccharomyces cerevisiae S288c]                              | 853158 | FMP43; MPC3; YGR243W    | transport                                                                                                                     | membrane;mitochondrion         | transporter activity                                                 | 0.468 | 0.778 | 1.66 |
| Q12032 | Altered inheritance of mitochondria protein 41, mitochondrial [OS=Saccharomyces cerevisiae S288c] | 854390 | AIM41; YOR215C          |                                                                                                                               | mitochondrion                  | catalytic activity                                                   | 0.468 | 0.778 | 1.66 |
| P27929 | 37S ribosomal protein NAM9, mitochondrial [OS=Saccharomyces cerevisiae S288c]                     | 855585 | NAM9; YNL137C           | cell organization and biogenesis;metabolic process;regulation of biological process                                           | mitochondrion;ribosome         | RNA binding;structural molecule activity                             | 0.484 | 0.808 | 1.67 |
| P36517 | 54S ribosomal protein L4, mitochondrial [OS=Saccharomyces cerevisiae S288c]                       | 851160 | MRPL4; YLR439W          | cell organization and biogenesis;metabolic process                                                                            | mitochondrion;ribosome         | structural molecule activity                                         | 0.52  | 0.874 | 1.68 |
| P37267 | Assembly factor cbp4 [OS=Saccharomyces cerevisiae S288c]                                          |        | CBP4                    | cell organization and biogenesis                                                                                              | membrane;mitochondrion         |                                                                      | 0.52  | 0.874 | 1.68 |
| Q02784 | Monothiol glutaredoxin-5, mitochondrial [OS=Saccharomyces cerevisiae S288c]                       | 856048 | GRX5; YPL059W           | cell organization and biogenesis;cellular homeostasis;metabolic process;regulation of biological process;response to stimulus | mitochondrion;organelle lumen  | catalytic activity;metal ion binding                                 | 0.668 | 1.154 | 1.73 |
| P06169 | pyruvate decarboxylase isozyme 1 [OS=Saccharomyces cerevisiae S288c]                              | 850733 | PDC1; YLR044C           | metabolic process                                                                                                             | cytoplasm;cytosol;nucleus      | catalytic activity;metal ion binding                                 | 1.043 | 1.807 | 1.73 |
| P38771 | Ribosome-recycling factor, mitochondrial [OS=Saccharomyces cerevisiae S288c]                      | 856433 | RRF1; YHR038W           | cell organization and biogenesis;metabolic process                                                                            | mitochondrion                  | RNA binding                                                          | 0.719 | 1.254 | 1.74 |
| Q05892 | MIOREX complex component 2 [OS=Saccharomyces cerevisiae S288c]                                    | 850997 | YLR290C; COQ11; YLR290C | metabolic process                                                                                                             | mitochondrion                  | catalytic activity                                                   | 0.778 | 1.371 | 1.76 |
| Q12233 | ATP synthase subunit g, mitochondrial [OS=Saccharomyces cerevisiae S288c]                         | 856131 | ATP20; YPR020W          | cell organization and biogenesis;metabolic process;transport                                                                  | membrane;mitochondrion         | catalytic activity;transporter activity                              | 0.778 | 1.371 | 1.76 |
| P81449 | ATP synthase subunit e, mitochondrial [OS=Saccharomyces cerevisiae S288c]                         | 851922 | TIM11; YDR322C-A        | cell organization and biogenesis;metabolic process;transport                                                                  | membrane;mitochondrion         | catalytic activity;structural molecule activity;transporter activity | 0.778 | 1.371 | 1.76 |
| P40098 | uncharacterized mitochondrial membrane protein FMP10 [OS=Saccharomyces cerevisiae S288c]          | 856931 | FMP10; YER182W          |                                                                                                                               | membrane;mitochondrion         |                                                                      | 1.336 | 2.36  | 1.77 |
| Q96VH5 | MICOS complex subunit Mic10 [OS=Saccharomyces cerevisiae S288c]                                   | 850300 | MOS1; MIC10; YCL057C-A  | cell organization and biogenesis                                                                                              | membrane;mitochondrion         |                                                                      | 0.931 | 1.683 | 1.81 |
| P36516 | 54S ribosomal protein L3, mitochondrial [OS=Saccharomyces cerevisiae S288c]                       | 855039 | MRPL3; YMR024W          | cell organization and biogenesis;metabolic process;response to stimulus                                                       | mitochondrion;nucleus;ribosome | catalytic activity;RNA binding;structural molecule activity          | 0.269 | 0.487 | 1.81 |
| P00128 | Cytochrome b-c1 complex subunit 7 [OS=Saccharomyces cerevisiae S288c]                             | 852142 | QCR7; YDR529C           | cell organization and biogenesis;metabolic process;transport                                                                  | membrane;mitochondrion         | catalytic activity;transporter activity                              | 3.642 | 6.743 | 1.85 |
| P00427 | Cytochrome c oxidase subunit 6, mitochondrial [OS=Saccharomyces cerevisiae S288c]                 | 856448 | COX6; YHR051W           | metabolic process;transport                                                                                                   | membrane;mitochondrion         | catalytic activity;metal ion binding;transporter activity            | 1.154 | 2.162 | 1.87 |
| P12686 | 37S ribosomal protein MRP13, mitochondrial [OS=Saccharomyces cerevisiae S288c]                    | 852975 | MRP13; YGR084C          | cell organization and biogenesis;metabolic process                                                                            | mitochondrion;ribosome         | structural molecule activity                                         | 0.413 | 0.778 | 1.88 |

|        |                                                                                                            |        |                  |                                                                                                          |                                                               |                                                             |       |       |      |
|--------|------------------------------------------------------------------------------------------------------------|--------|------------------|----------------------------------------------------------------------------------------------------------|---------------------------------------------------------------|-------------------------------------------------------------|-------|-------|------|
| Q01574 | acetyl-coenzyme A synthetase 1 [OS=Saccharomyces cerevisiae S288c]                                         | 851245 | ACS1; YAL054C    | cell organization and biogenesis;metabolic process                                                       | cytoplasm;cytosol;endoplasmic reticulum;mitochondrion;nucleus | catalytic activity;nucleotide binding                       | 1.482 | 2.793 | 1.88 |
| Q12289 | mitochondrial carnitine carrier [OS=Saccharomyces cerevisiae S288c]                                        | 854267 | CRC1; YOR100C    | metabolic process;transport                                                                              | membrane;mitochondrion                                        | structural molecule activity;transporter activity           | 0.73  | 1.404 | 1.92 |
| Q03104 | Meiotic sister chromatid recombination protein 1 [OS=Saccharomyces cerevisiae S288c]                       | 854911 | MSC1; YML128C    | metabolic process                                                                                        | endoplasmic reticulum;membrane;mitochondrion                  |                                                             | 1.712 | 3.299 | 1.93 |
| Q02950 | 37S ribosomal protein MRP51, mitochondrial [OS=Saccharomyces cerevisiae S288c]                             | 855985 | MRP51; YPL118W   | cell organization and biogenesis;metabolic process                                                       | mitochondrion;ribosome                                        | structural molecule activity                                | 0.407 | 0.817 | 2.01 |
| P40008 | Protein FMP52, mitochondrial [OS=Saccharomyces cerevisiae S288c]                                           | 856721 | FMP52; YER004W   |                                                                                                          | endoplasmic reticulum;membrane;mitochondrion                  | catalytic activity                                          | 1.054 | 2.162 | 2.05 |
| P53170 | [Pyruvate dehydrogenase (acetyl-transferring)] kinase 2, mitochondrial [OS=Saccharomyces cerevisiae S288c] | 852821 | PKP2; YGL059W    | metabolic process;regulation of biological process                                                       | mitochondrion;organelle lumen                                 | catalytic activity;nucleotide binding;protein binding       | 0.086 | 0.179 | 2.08 |
| Q06510 | Lysophosphatidylcholine acyltransferase [OS=Saccharomyces cerevisiae S288c]                                | 856262 | TAZ1; YPR140W    | cell organization and biogenesis;metabolic process;transport                                             | membrane;mitochondrion                                        | catalytic activity                                          | 0.093 | 0.194 | 2.09 |
| P38909 | cytochrome c mitochondrial import factor CYC2 [OS=Saccharomyces cerevisiae S288c]                          | 854202 | CYC2; YOR037W    | cell organization and biogenesis;metabolic process                                                       | membrane;mitochondrion                                        | catalytic activity                                          | 0.093 | 0.194 | 2.09 |
| P41911 | Glycerol-3-phosphate dehydrogenase [NAD(+)] 2, mitochondrial [OS=Saccharomyces cerevisiae S288c]           | 854095 | GPD2; YOL059W    | metabolic process                                                                                        | cytoplasm;cytosol;mitochondrion                               | catalytic activity;nucleotide binding;protein binding       | 0.089 | 0.186 | 2.09 |
| P53736 | Uncharacterized protein YNR040W [OS=Saccharomyces cerevisiae S288c]                                        | 855776 | YNR040W; YNR040W |                                                                                                          | mitochondrion                                                 |                                                             | 0.116 | 0.245 | 2.11 |
| P36528 | 54S ribosomal protein L17, mitochondrial [OS=Saccharomyces cerevisiae S288c]                               | 855469 | MRPL17; YNL252C  | cell organization and biogenesis;metabolic process                                                       | mitochondrion;ribosome                                        | structural molecule activity                                | 0.11  | 0.233 | 2.12 |
| P02381 | Ribosomal protein VAR1, mitochondrial [OS=Saccharomyces cerevisiae S288c]                                  | 854586 | VAR1; Q0140      | cell organization and biogenesis;metabolic process                                                       | mitochondrion;ribosome                                        | structural molecule activity                                | 0.11  | 0.233 | 2.12 |
| P54857 | lipase 2 [OS=Saccharomyces cerevisiae S288c]                                                               | 851628 | TGL2; YDR058C    | metabolic process;transport                                                                              | mitochondrion                                                 | catalytic activity                                          | 0.11  | 0.233 | 2.12 |
| P39722 | Mitochondrial Rho GTPase 1 [OS=Saccharomyces cerevisiae S288c]                                             | 851249 | GEM1; YAL048C    | cell organization and biogenesis;regulation of biological process;response to stimulus;transport         | membrane;mitochondrion                                        | catalytic activity;metal ion binding;nucleotide binding     | 0.122 | 0.259 | 2.12 |
| P36139 | protein PET10 [OS=Saccharomyces cerevisiae S288c]                                                          | 853920 | PET10; YKR046C   | metabolic process                                                                                        | membrane                                                      |                                                             | 0.122 | 0.259 | 2.12 |
| P09201 | fructose-1,6-bisphosphatase [OS=Saccharomyces cerevisiae S288c]                                            | 851092 | FBP1; YLR377C    | metabolic process                                                                                        | cytosol                                                       | catalytic activity;metal ion binding                        | 0.129 | 0.274 | 2.12 |
| P25270 | rRNA methyltransferase 1, mitochondrial [OS=Saccharomyces cerevisiae S288c]                                | 854376 | MRM1; YOR201C    | metabolic process                                                                                        | mitochondrion                                                 | catalytic activity;RNA binding                              | 0.129 | 0.274 | 2.12 |
| P53982 | isocitrate dehydrogenase [NADP] [OS=Saccharomyces cerevisiae S288c]                                        | 855723 | IDP3; YNL009W    | metabolic process                                                                                        | cytoplasm;mitochondrion                                       | catalytic activity;metal ion binding;nucleotide binding     | 1.371 | 2.924 | 2.13 |
| P38323 | ATP-dependent clpX-like chaperone, mitochondrial [OS=Saccharomyces cerevisiae S288c]                       | 852528 | MCX1; YBR227C    | metabolic process                                                                                        | membrane;mitochondrion;organelle lumen                        | catalytic activity;nucleotide binding                       | 0.145 | 0.311 | 2.14 |
| P38816 | thioredoxin reductase 2, mitochondrial [OS=Saccharomyces cerevisiae S288c]                                 | 856506 | TRR2; YHR106W    | cellular homeostasis;metabolic process;regulation of biological process;response to stimulus             | cytoplasm;mitochondrion                                       | antioxidant activity;catalytic activity                     | 0.136 | 0.292 | 2.15 |
| Q06630 | Mitochondrial homologous recombination protein 1 [OS=Saccharomyces cerevisiae S288c]                       | 851890 | MHR1; YDR296W    | cell organization and biogenesis;metabolic process;regulation of biological process;response to stimulus | mitochondrion;nucleus                                         | catalytic activity;DNA binding;structural molecule activity | 0.166 | 0.359 | 2.16 |
| Q07560 | Cardiolipin synthase (CMP-forming) [OS=Saccharomyces cerevisiae S288c]                                     | 851413 | CRD1; YDL142C    | cell organization and biogenesis;cellular homeostasis;metabolic process                                  | membrane;mitochondrion                                        | catalytic activity                                          | 0.166 | 0.359 | 2.16 |
| P40086 | Cytochrome c oxidase assembly protein cox15 [OS=Saccharomyces cerevisiae S288c]                            | 856884 | COX15; YER141W   | cell organization and biogenesis;metabolic process;transport                                             | membrane;mitochondrion                                        | catalytic activity;transporter activity                     | 0.532 | 1.154 | 2.17 |

|        |                                                                                                                     |        |                        |                                                                                                        |                                         |                                                           |       |       |      |
|--------|---------------------------------------------------------------------------------------------------------------------|--------|------------------------|--------------------------------------------------------------------------------------------------------|-----------------------------------------|-----------------------------------------------------------|-------|-------|------|
| P53230 | Phosphatidate cytidyltransferase, mitochondrial [OS=Saccharomyces cerevisiae S288c]                                 | 852937 | TAM41; YGR046W         | metabolic process                                                                                      | membrane;mitochondrion;organelle lumen  | catalytic activity                                        | 0.186 | 0.407 | 2.19 |
| P23369 | 54S ribosomal protein L25, mitochondrial [OS=Saccharomyces cerevisiae S288c]                                        | 852967 | MRPL25; YGR076C        | cell organization and biogenesis;metabolic process                                                     | mitochondrion;ribosome                  | structural molecule activity                              | 0.233 | 0.52  | 2.23 |
| P40452 | Cytochrome c oxidase assembly factor 1 [OS=Saccharomyces cerevisiae S288c]                                          | 854649 | COA1; YIL157C          | cell organization and biogenesis                                                                       | membrane;mitochondrion                  | protein binding                                           | 0.233 | 0.52  | 2.23 |
| P17709 | Glucokinase-1 [OS=Saccharomyces cerevisiae S288c]                                                                   | 850317 | GLK1; YCL040W          | cellular homeostasis;metabolic process;transport                                                       | cytosol;membrane                        | catalytic activity;nucleotide binding                     | 0.259 | 0.585 | 2.26 |
| P23833 | Protein SCO1, mitochondrial [OS=Saccharomyces cerevisiae S288c]                                                     | 852325 | SCO1; YBR037C          | cell organization and biogenesis;cellular homeostasis;response to stimulus;transport                   | membrane;mitochondrion                  | antioxidant activity;catalytic activity;metal ion binding | 0.292 | 0.668 | 2.29 |
| Q12165 | ATP synthase subunit delta, mitochondrial [OS=Saccharomyces cerevisiae S288c]                                       | 851560 | ATP16; YDL004W         | metabolic process;transport                                                                            | membrane;mitochondrion                  | catalytic activity;transporter activity                   | 0.334 | 0.778 | 2.33 |
| P00447 | Superoxide dismutase [Mn], mitochondrial [OS=Saccharomyces cerevisiae S288c]                                        | 856399 | SOD2; YHR008C          | metabolic process;response to stimulus                                                                 | mitochondrion;organelle lumen           | antioxidant activity;catalytic activity;metal ion binding | 1.031 | 2.455 | 2.38 |
| P35180 | mitochondrial import receptor subunit Tom20 [OS=Saccharomyces cerevisiae S288c]                                     | 852973 | TOM20; YGR082W         | cell organization and biogenesis;transport                                                             | membrane;mitochondrion                  | protein binding;transporter activity                      | 0.425 | 1.031 | 2.43 |
| P40513 | Mitochondrial acidic protein MAM33 [OS=Saccharomyces cerevisiae S288c]                                              | 854740 | MAM33; YIL070C         | metabolic process;regulation of biological process                                                     | mitochondrion;organelle lumen           | translation regulator activity                            | 1.154 | 2.831 | 2.45 |
| P53163 | 54S ribosomal protein L12, mitochondrial [OS=Saccharomyces cerevisiae S288c]                                        | 852811 | MNP1; YGL068W          | cell organization and biogenesis;metabolic process                                                     | mitochondrion;ribosome                  | RNA binding;structural molecule activity                  | 0.52  | 1.31  | 2.52 |
| Q01217 | Protein ARG5,6, mitochondrial [OS=Saccharomyces cerevisiae S288c]                                                   | 856800 | ARG5,6; YER069W        | metabolic process;regulation of biological process                                                     | cytoplasm;mitochondrion;organelle lumen | catalytic activity;nucleotide binding;protein binding     | 0.087 | 0.233 | 2.68 |
| P81451 | ATP synthase subunit K, mitochondrial [OS=Saccharomyces cerevisiae S288c]                                           | 854077 | ATP19; YOL077W-A       | cell organization and biogenesis;metabolic process;transport                                           | membrane;mitochondrion                  | catalytic activity;transporter activity                   | 1.154 | 3.642 | 3.16 |
| P39677 | Ribosome-releasing factor 2, mitochondrial [OS=Saccharomyces cerevisiae S288c]                                      | 853342 | MEF2; YJL102W          | cell organization and biogenesis;metabolic process                                                     | cytosol;mitochondrion                   | catalytic activity;nucleotide binding;RNA binding         | 0.056 | 0.179 | 3.20 |
| Q04472 | Mitochondrial inner membrane $\epsilon$ -AAA protease supercomplex subunit MGR3 [OS=Saccharomyces cerevisiae S288c] | 855142 | MGR3; YMR115W          | metabolic process                                                                                      | membrane;mitochondrion                  | protein binding                                           | 0.072 | 0.233 | 3.24 |
| P38756 | tRNA threonylcarbamoyladenosine dehydratase 1 [OS=Saccharomyces cerevisiae S288c]                                   | 856392 | TCD1; YHR003C; YHR003C | metabolic process                                                                                      | cytosol;membrane;mitochondrion          | catalytic activity;nucleotide binding                     | 0.093 | 0.304 | 3.27 |
| P47039 | Probable kynurenine--oxoglutarate transaminase BNA3 [OS=Saccharomyces cerevisiae S288c]                             | 853386 | BNA3; YJL060W          | metabolic process;regulation of biological process                                                     | cytoplasm;mitochondrion                 | catalytic activity                                        | 0.101 | 0.334 | 3.31 |
| P47140 | Altered inheritance rate of mitochondria protein 25 [OS=Saccharomyces cerevisiae S288c]                             | 853563 | AIM25; YJR100C         | cell organization and biogenesis                                                                       | membrane;mitochondrion                  | transporter activity                                      | 0.11  | 0.369 | 3.35 |
| P14693 | sorting assembly machinery 35 kDa subunit [OS=Saccharomyces cerevisiae S288c]                                       | 856483 | SAM35; YHR083W         | cell organization and biogenesis;transport                                                             | membrane;mitochondrion                  | protein binding                                           | 0.155 | 0.54  | 3.48 |
| P22353 | 54S ribosomal protein L8, mitochondrial [OS=Saccharomyces cerevisiae S288c]                                         | 853382 | MRPL8; YJL063C         | cell organization and biogenesis;metabolic process                                                     | mitochondrion;ribosome                  | structural molecule activity                              | 0.166 | 0.585 | 3.52 |
| P17695 | Glutaredoxin-2, mitochondrial [OS=Saccharomyces cerevisiae S288c]                                                   | 852124 | GRX2; YDR513W          | cellular homeostasis;metabolic process;regulation of biological process;response to stimulus;transport | cytoplasm;cytosol;mitochondrion;nucleus | antioxidant activity;catalytic activity                   | 0.233 | 0.874 | 3.75 |
| P39994 | Putative 2-hydroxyacyl-CoA lyase [OS=Saccharomyces cerevisiae S288c]                                                | 856694 | YEL020C; YEL020C       |                                                                                                        | cytoplasm                               | catalytic activity;metal ion binding                      | 0.083 | 0.374 | 4.51 |

**Supplemental Table S9. The relative concentrations of proteins in mitochondria purified from *ups1Δ* cells cultured with or without LCA.** Mitochondria were purified from *ups1Δ* cells recovered on day 7 of cell culturing with or without LCA. Mass spectrometry-based identification and quantitation of proteins recovered in purified mitochondria were performed as described in Materials and methods. The exponentially modified protein abundance index (emPAI) provided by the "Proteome Discoverer" software was used to calculate the relative abundance of mitochondrial proteins between specified datasets. Data on the relative concentrations of mitochondrial proteins are presented as means of 2 independent experiments.

| Accession | Description                                                                                                        | Entrez Gene ID | Gene ID              | Biological Process                                             | Cellular Component                             | Molecular Function                                            | emPAI <i>ups1</i> | emPAI <i>ups1</i> + LCA | Ratio <i>ups1</i> + LCA / <i>ups1</i> |
|-----------|--------------------------------------------------------------------------------------------------------------------|----------------|----------------------|----------------------------------------------------------------|------------------------------------------------|---------------------------------------------------------------|-------------------|-------------------------|---------------------------------------|
| Q12374    | Nuclear control of ATPase protein 2                                                                                | 856278         | NCA2                 | metabolic process                                              | membrane; mitochondrion                        |                                                               | 1.154             | 0.066                   | 0.06                                  |
| P50088    | Stationary phase gene 1 protein [OS=Saccharomyces cerevisiae S288c]                                                | 853151         | SPG1; YGR236C        |                                                                | endoplasmic reticulum; membrane; mitochondrion |                                                               | 250.19            | 14.849                  | 0.06                                  |
| P00128    | Cytochrome b-c1 complex subunit 7 [OS=Saccharomyces cerevisiae S288c]                                              | 852142         | QCR7; YDR529C        | cell organization and biogenesis; metabolic process; transport | membrane; mitochondrion                        | catalytic activity; transporter activity                      | 15.681            | 1.154                   | 0.07                                  |
| P37298    | Succinate dehydrogenase [ubiquinone] cytochrome b small subunit, mitochondrial [OS=Saccharomyces cerevisiae S288c] | 851758         | SDH4; YDR178W        | metabolic process; transport                                   | membrane; mitochondrion                        | catalytic activity; metal ion binding                         | 9                 | 0.668                   | 0.07                                  |
| P16547    | Mitochondrial outer membrane protein OM45 [OS=Saccharomyces cerevisiae S288c]                                      | 854670         | OM45; YIL136W        |                                                                | membrane; mitochondrion                        |                                                               | 2088.3            | 189.546                 | 0.09                                  |
| P18239    | ADP, ATP carrier protein 2 [OS=Saccharomyces cerevisiae S288c]                                                     | 852250         | PET9; YBL030C        | cell death; metabolic process; transport                       | membrane; mitochondrion                        | structural molecule activity; transporter activity            | 591.55            | 64.793                  | 0.11                                  |
| P39952    | Mitochondrial inner membrane protein OXA1 [OS=Saccharomyces cerevisiae S288c]                                      | 856898         | OXA1; YER154W        | cell organization and biogenesis; transport                    | membrane; mitochondrion                        | transporter activity                                          | 2.652             | 0.334                   | 0.13                                  |
| P12687    | 54S ribosomal protein L2, mitochondrial [OS=Saccharomyces cerevisiae S288c]                                        | 855727         | MRP7; YNL005C        | cell organization and biogenesis; metabolic process            | mitochondrion; ribosome                        | catalytic activity; RNA binding; structural molecule activity | 1.848             | 0.233                   | 0.13                                  |
| P39726    | Glycine cleavage system H protein, mitochondrial [OS=Saccharomyces cerevisiae S288c]                               | 851254         | GCV3; YAL044C        | metabolic process                                              | mitochondrion                                  | catalytic activity                                            | 20.544            | 2.594                   | 0.13                                  |
| P33421    | Succinate dehydrogenase [ubiquinone] cytochrome b subunit, mitochondrial [OS=Saccharomyces cerevisiae S288c]       | 853716         | SDH3; YKL141W        | cell organization and biogenesis; metabolic process; transport | membrane; mitochondrion                        | catalytic activity; metal ion binding                         | 1.276             | 0.179                   | 0.14                                  |
| P32897    | Mitochondrial import inner membrane translocase subunit tim23 [OS=Saccharomyces cerevisiae S288c]                  | 855751         | TIM23; YNR017W       | transport                                                      | membrane; mitochondrion                        | protein binding; transporter activity                         | 4.012             | 0.585                   | 0.15                                  |
| P32340    | Rotenone-insensitive NADH-ubiquinone oxidoreductase, mitochondrial [OS=Saccharomyces cerevisiae S288c]             | 854919         | ND1; YML120C         | metabolic process; regulation of biological process            | membrane; mitochondrion; organelle lumen       | catalytic activity; nucleotide binding                        | 61.102            | 9                       | 0.15                                  |
| P00424    | Cytochrome c oxidase polypeptide 5A, mitochondrial [OS=Saccharomyces cerevisiae S288c]                             | 855675         | COX5A; YNL052W       | metabolic process; transport                                   | membrane; mitochondrion                        | catalytic activity; transporter activity                      | 3.329             | 0.52                    | 0.16                                  |
| Q12165    | ATP synthase subunit delta, mitochondrial [OS=Saccharomyces cerevisiae S288c]                                      | 851560         | ATP16; YDL004W       | metabolic process; transport                                   | membrane; mitochondrion                        | catalytic activity; transporter activity                      | 4.623             | 0.778                   | 0.17                                  |
| P07251    | ATP synthase subunit alpha, mitochondrial [OS=Saccharomyces cerevisiae S288c]                                      | 852177         | ATP1; YBL099W        | metabolic process; transport                                   | cytosol; membrane; mitochondrion               | catalytic activity; nucleotide binding; transporter activity  | 120.15            | 20.544                  | 0.17                                  |
| P36526    | 54S ribosomal protein L27, mitochondrial [OS=Saccharomyces cerevisiae S288c]                                       | 852585         | MRPL27; YBR282W      | cell organization and biogenesis; metabolic process            | mitochondrion; ribosome                        | structural molecule activity                                  | 1.512             | 0.259                   | 0.17                                  |
| P27697    | Atypical kinase COQ8, mitochondrial [OS=Saccharomyces cerevisiae S288c]                                            | 852758         | COQ8; YGL119W        | metabolic process                                              | membrane; mitochondrion; organelle lumen       | catalytic activity; nucleotide binding                        | 0.365             | 0.064                   | 0.18                                  |
| P46367    | Potassium-activated aldehyde dehydrogenase, mitochondrial [OS=Saccharomyces cerevisiae S288c]                      | 854556         | ALD4; YOR374W        | metabolic process                                              | mitochondrion; organelle lumen                 | catalytic activity                                            | 219.22            | 38.811                  | 0.18                                  |
| P32316    | acetyl-CoA hydrolase [OS=Saccharomyces cerevisiae S288c]                                                           | 852266         | ACH1; YBL015W        | metabolic process                                              | cytoplasm; cytosol; mitochondrion              | catalytic activity                                            | 99                | 17.738                  | 0.18                                  |
| P53311    | Mitochondrial pyruvate carrier 3 [OS=Saccharomyces cerevisiae S288c]                                               | 853158         | FMP43; MPC3; YGR243W | transport                                                      | membrane; mitochondrion                        | transporter activity                                          | 1.154             | 0.212                   | 0.18                                  |
| P20967    | 2-oxoglutarate dehydrogenase, mitochondrial [OS=Saccharomyces cerevisiae S288c]                                    | 854681         | KGD1; YIL125W        | metabolic process                                              | cytosol; mitochondrion; organelle lumen        | catalytic activity                                            | 55.848            | 10.392                  | 0.19                                  |

|        |                                                                                                                                              |        |                 |                                                                                              |                                                 |                                                            |        |        |      |
|--------|----------------------------------------------------------------------------------------------------------------------------------------------|--------|-----------------|----------------------------------------------------------------------------------------------|-------------------------------------------------|------------------------------------------------------------|--------|--------|------|
| P53312 | Succinyl-CoA ligase [ADP-forming] subunit beta, mitochondrial [OS=Saccharomyces cerevisiae S288c]                                            | 853159 | LSC2; YGR244C   | metabolic process                                                                            | mitochondrion                                   | catalytic activity;nucleotide binding                      | 37.075 | 7.003  | 0.19 |
| P06168 | ketol-acid reductoisomerase, mitochondrial [OS=Saccharomyces cerevisiae S288c]                                                               | 851069 | ILV5; YLR355C   | cell organization and biogenesis;metabolic process                                           | mitochondrion                                   | catalytic activity;DNA binding;metal ion binding           | 42.94  | 8.211  | 0.19 |
| P07213 | Mitochondrial import receptor subunit TOM70 [OS=Saccharomyces cerevisiae S288c]                                                              | 855602 | TOM70; YNL121C  | cell organization and biogenesis;transport                                                   | membrane;mitochondrion                          | protein binding;transporter activity                       | 5.236  | 1.031  | 0.20 |
| P32891 | D-lactate dehydrogenase [cytochrome] 1, mitochondrial [OS=Saccharomyces cerevisiae S288c]                                                    | 851380 | DLD1; YDL174C   | metabolic process;transport                                                                  | membrane;mitochondrion                          | catalytic activity;nucleotide binding                      | 32.839 | 6.627  | 0.20 |
| P21771 | 37S ribosomal protein S28, mitochondrial [OS=Saccharomyces cerevisiae S288c]                                                                 | 851937 | MRPS28; YDR337W | cell organization and biogenesis;metabolic process                                           | mitochondrion;ribosome                          | RNA binding;structural molecule activity                   | 1.336  | 0.274  | 0.21 |
| P38910 | 10 kDa heat shock protein, mitochondrial [OS=Saccharomyces cerevisiae S288c]                                                                 | 854185 | HSP10; YOR020C  | cell organization and biogenesis;metabolic process;response to stimulus;transport            | cytoplasm;mitochondrion;organelle lumen         | metal ion binding;nucleotide binding;protein binding       | 6.499  | 1.371  | 0.21 |
| P15179 | Aspartate--tRNA ligase, mitochondrial [OS=Saccharomyces cerevisiae S288c]                                                                    | 856000 | MSD1; YPL104W   | metabolic process                                                                            | cytoplasm;mitochondrion;organelle lumen         | catalytic activity;nucleotide binding                      | 0.535  | 0.113  | 0.21 |
| P47039 | Probable kynurenine--oxoglutarate transaminase BNA3 [OS=Saccharomyces cerevisiae S288c]                                                      | 853386 | BNA3; YJL060W   | metabolic process;regulation of biological process                                           | cytoplasm;mitochondrion                         | catalytic activity                                         | 0.468  | 0.101  | 0.22 |
| P09624 | Dihydrolipoyl dehydrogenase, mitochondrial [OS=Saccharomyces cerevisiae S288c]                                                               | 850527 | LPD1; YFL018C   | cellular homeostasis;metabolic process;regulation of biological process                      | mitochondrion;organelle lumen                   | catalytic activity;nucleotide binding                      | 113.51 | 24.809 | 0.22 |
| P34227 | Mitochondrial peroxiredoxin PRX1 [OS=Saccharomyces cerevisiae S288c]                                                                         | 852215 | PRX1; YBL064C   | cellular homeostasis;metabolic process;regulation of biological process;response to stimulus | mitochondrion                                   | antioxidant activity;catalytic activity                    | 17.33  | 3.833  | 0.22 |
| P33303 | Succinate/fumarate mitochondrial transporter [OS=Saccharomyces cerevisiae S288c]                                                             | 853558 | SFC1; YJR095W   | metabolic process;transport                                                                  | membrane;mitochondrion                          | structural molecule activity;transporter activity          | 39.842 | 9      | 0.23 |
| P47045 | mitochondrial import inner membrane translocase subunit TIM54 [OS=Saccharomyces cerevisiae S288c]                                            | 853392 | TIM54; YJL054W  | cell organization and biogenesis;transport                                                   | cytosol;membrane;mitochondrion                  | transporter activity                                       | 1.054  | 0.241  | 0.23 |
| Q06892 | NADH kinase POS5, mitochondrial [OS=Saccharomyces cerevisiae S288c]                                                                          | 855913 | POS5; YPL188W   | metabolic process;response to stimulus                                                       | mitochondrion;organelle lumen                   | catalytic activity;nucleotide binding                      | 1.565  | 0.369  | 0.24 |
| P41921 | glutathione reductase [OS=Saccharomyces cerevisiae S288c]                                                                                    | 856014 | GLR1; YPL091W   | cellular homeostasis;metabolic process;regulation of biological process;response to stimulus | cytoplasm;cytosol;mitochondrion;nucleus         | antioxidant activity;catalytic activity;nucleotide binding | 0.655  | 0.155  | 0.24 |
| P19414 | Aconitate hydratase, mitochondrial [OS=Saccharomyces cerevisiae S288c]                                                                       | 851013 | ACO1; YLR304C   | cell organization and biogenesis;metabolic process;transport                                 | cytoplasm;cytosol;mitochondrion;organelle lumen | catalytic activity;DNA binding;metal ion binding           | 109.53 | 26.213 | 0.24 |
| P30902 | ATP synthase subunit d, mitochondrial [OS=Saccharomyces cerevisiae S288c]                                                                    | 853853 | ATP7; YKL016C   | metabolic process;transport                                                                  | membrane;mitochondrion                          | catalytic activity;transporter activity                    | 9      | 2.162  | 0.24 |
| P02992 | elongation factor Tu, mitochondrial [OS=Saccharomyces cerevisiae S288c]                                                                      | 854359 | TUF1; YOR187W   | cell organization and biogenesis;metabolic process                                           | mitochondrion                                   | catalytic activity;nucleotide binding;RNA binding          | 33.551 | 8.152  | 0.24 |
| Q06236 | Mitochondrial inner membrane protein SHH4 [OS=Saccharomyces cerevisiae S288c]                                                                | 850861 | SHH4; YLR164W   | metabolic process                                                                            | membrane;mitochondrion                          | catalytic activity;metal ion binding                       | 1.371  | 0.334  | 0.24 |
| P38120 | 37S ribosomal protein S9, mitochondrial [OS=Saccharomyces cerevisiae S288c]                                                                  | 852443 | MRPS9; YBR146W  | cell organization and biogenesis;metabolic process                                           | mitochondrion;ribosome                          | RNA binding;structural molecule activity                   | 1.254  | 0.311  | 0.25 |
| P12695 | Dihydrolipoyllysine-residue acetyltransferase component of pyruvate dehydrogenase complex, mitochondrial [OS=Saccharomyces cerevisiae S288c] | 855653 | LAT1; YNL071W   | metabolic process                                                                            | mitochondrion;organelle lumen                   | catalytic activity                                         | 21.638 | 5.404  | 0.25 |
| Q03028 | Mitochondrial 2-oxodicarboxylate carrier 1 [OS=Saccharomyces cerevisiae S288c]                                                               | 855969 | ODC1; YPL134C   | metabolic process;transport                                                                  | membrane;mitochondrion                          | structural molecule activity;transporter activity          | 10.365 | 2.594  | 0.25 |
| P32191 | Glycerol-3-phosphate dehydrogenase, mitochondrial [OS=Saccharomyces cerevisiae S288c]                                                        | 854651 | GUT2; YIL155C   | metabolic process                                                                            | membrane;mitochondrion                          | catalytic activity                                         | 18.855 | 4.834  | 0.26 |
| P37292 | Serine hydroxymethyltransferase, mitochondrial [OS=Saccharomyces cerevisiae S288c]                                                           | 852565 | SHM1; YBR263W   | metabolic process                                                                            | mitochondrion                                   | catalytic activity                                         | 14.199 | 3.642  | 0.26 |
| P23180 | Probable oxidoreductase AIM17 [OS=Saccharomyces cerevisiae S288c]                                                                            | 856365 | AIM17; YHL021C  | cell organization and biogenesis;metabolic process                                           | mitochondrion                                   | catalytic activity;metal ion binding                       | 11.589 | 2.981  | 0.26 |
| P40530 | [Pyruvate dehydrogenase (acetyl-transferring)] kinase 1, mitochondrial [OS=Saccharomyces cerevisiae S288c]                                   | 854769 | PKP1; YIL042C   | metabolic process                                                                            | mitochondrion;organelle lumen                   | catalytic activity;nucleotide binding;protein binding      | 0.931  | 0.245  | 0.26 |
| P17505 | Malate dehydrogenase, mitochondrial [OS=Saccharomyces cerevisiae S288c]                                                                      | 853777 | MDH1; YKL085W   | metabolic process                                                                            | mitochondrion;organelle lumen                   | catalytic activity;protein binding;RNA binding             | 172.02 | 45.416 | 0.26 |

|        |                                                                                                            |        |                        |                                                                                                             |                                                          |                                                                                        |        |        |      |
|--------|------------------------------------------------------------------------------------------------------------|--------|------------------------|-------------------------------------------------------------------------------------------------------------|----------------------------------------------------------|----------------------------------------------------------------------------------------|--------|--------|------|
| P19882 | heat shock protein 60, mitochondrial [OS=Saccharomyces cerevisiae S288c]                                   | 850963 | HSP60; YLR259C         | cell organization and biogenesis;metabolic process;regulation of biological process;transport               | cytoplasm;cytosol;membrane;mitochondrion;organelle lumen | catalytic activity;DNA binding;nucleotide binding;protein binding                      | 93.12  | 25.367 | 0.27 |
| P10662 | 37S ribosomal protein MRP1, mitochondrial [OS=Saccharomyces cerevisiae S288c]                              | 851948 | MRP1; YDR347W          | cell organization and biogenesis;metabolic process;response to stimulus                                     | mitochondrion;ribosome                                   | antioxidant activity;catalytic activity;metal ion binding;structural molecule activity | 1.512  | 0.413  | 0.27 |
| P32335 | Protein MSS51, mitochondrial [OS=Saccharomyces cerevisiae S288c]                                           | 850900 | MSS51; YLR203C         | metabolic process;regulation of biological process                                                          | membrane;mitochondrion                                   | protein binding;translation regulator activity                                         | 1.712  | 0.468  | 0.27 |
| P49367 | Homoaconitase, mitochondrial [OS=Saccharomyces cerevisiae S288c]                                           | 851820 | LYS4; YDR234W          | metabolic process                                                                                           | mitochondrion                                            | catalytic activity;metal ion binding;protein binding                                   | 1.994  | 0.551  | 0.28 |
| Q03201 | 37S ribosomal protein S10, mitochondrial [OS=Saccharomyces cerevisiae S288c]                               | 851611 | RSM10; YDR041W         | cell organization and biogenesis;metabolic process                                                          | mitochondrion;ribosome                                   | structural molecule activity                                                           | 0.701  | 0.194  | 0.28 |
| Q12230 | Sphingolipid long chain base-responsive protein LSP1 [OS=Saccharomyces cerevisiae S288c]                   | 856103 | LSP1; YPL004C          | regulation of biological process;response to stimulus;transport                                             | cytoplasm;membrane;mitochondrion                         |                                                                                        | 72.564 | 20.544 | 0.28 |
| Q02486 | ARS-binding factor 2, mitochondrial [OS=Saccharomyces cerevisiae S288c]                                    | 855094 | ABF2; YMR072W          | cell organization and biogenesis;metabolic process;regulation of biological process                         | chromosome;mitochondrion;nucleus                         | DNA binding                                                                            | 118.38 | 33.551 | 0.28 |
| P04840 | Mitochondrial outer membrane protein porin 1 [OS=Saccharomyces cerevisiae S288c]                           | 855669 | POR1; YNL055C          | cell death;cell organization and biogenesis;cellular homeostasis;regulation of biological process;transport | cytoplasm;membrane;mitochondrion                         | transporter activity                                                                   | 60.585 | 17.33  | 0.29 |
| P27929 | 37S ribosomal protein NAM9, mitochondrial [OS=Saccharomyces cerevisiae S288c]                              | 855585 | NAM9; YNL137C          | cell organization and biogenesis;metabolic process;regulation of biological process                         | mitochondrion;ribosome                                   | RNA binding;structural molecule activity                                               | 1.352  | 0.389  | 0.29 |
| P38172 | MIOREX complex component 3 [OS=Saccharomyces cerevisiae S288c]                                             | 852181 | YBL095W; MRX3; YBL095W |                                                                                                             | membrane;mitochondrion                                   |                                                                                        | 0.501  | 0.145  | 0.29 |
| P38884 | Altered inheritance of mitochondria protein 18, mitochondrial [OS=Saccharomyces cerevisiae S288c]          | 856605 | AIM18; YHR198C         |                                                                                                             | mitochondrion                                            | catalytic activity                                                                     | 0.501  | 0.145  | 0.29 |
| P36519 | 54S ribosomal protein L7, mitochondrial [OS=Saccharomyces cerevisiae S288c]                                | 851823 | MRPL7; YDR237W         | cell organization and biogenesis;metabolic process                                                          | mitochondrion;ribosome                                   | RNA binding;structural molecule activity                                               | 0.468  | 0.136  | 0.29 |
| P04803 | Tryptophan-tRNA ligase, mitochondrial [OS=Saccharomyces cerevisiae S288c]                                  | 851861 | MSW1; YDR268W          | metabolic process                                                                                           | cytoplasm;mitochondrion;organelle lumen                  | catalytic activity;nucleotide binding                                                  | 0.468  | 0.136  | 0.29 |
| Q03976 | 37S ribosomal protein S24, mitochondrial [OS=Saccharomyces cerevisiae S288c]                               | 851755 | RSM24; YDR175C         | cell organization and biogenesis;metabolic process                                                          | mitochondrion;ribosome                                   | structural molecule activity                                                           | 1.089  | 0.318  | 0.29 |
| POCS90 | Heat shock protein SSC1, mitochondrial [OS=Saccharomyces cerevisiae S288c]                                 | 853503 | SSC1; YJR045C          | cell organization and biogenesis;metabolic process;regulation of biological process;transport               | membrane;mitochondrion;nucleus;organelle lumen           | catalytic activity;enzyme regulator activity;nucleotide binding;protein binding        | 243.84 | 71.629 | 0.29 |
| Q06678 | 54S ribosomal protein L35, mitochondrial [OS=Saccharomyces cerevisiae S288c]                               | 851921 | MRPL35; YDR322W        | cell organization and biogenesis;metabolic process                                                          | mitochondrion;ribosome                                   | structural molecule activity                                                           | 1.894  | 0.557  | 0.29 |
| Q12251 | Uncharacterized mitochondrial carrier YPR011C [OS=Saccharomyces cerevisiae S288c]                          | 856121 | YPR011C; YPR011C       | metabolic process;transport                                                                                 | membrane;mitochondrion                                   | structural molecule activity;transporter activity                                      | 0.389  | 0.116  | 0.30 |
| P38152 | Tricarboxylate transport protein [OS=Saccharomyces cerevisiae S288c]                                       | 852594 | CTP1; YBR291C          | metabolic process;transport                                                                                 | membrane;mitochondrion                                   | structural molecule activity;transporter activity                                      | 0.389  | 0.116  | 0.30 |
| P53170 | [Pyruvate dehydrogenase (acetyl-transferring)] kinase 2, mitochondrial [OS=Saccharomyces cerevisiae S288c] | 852821 | PKP2; YGL059W          | metabolic process;regulation of biological process                                                          | mitochondrion;organelle lumen                            | catalytic activity;nucleotide binding;protein binding                                  | 0.931  | 0.28   | 0.30 |
| Q02950 | 37S ribosomal protein MRP51, mitochondrial [OS=Saccharomyces cerevisiae S288c]                             | 855985 | MRP51; YPL118W         | cell organization and biogenesis;metabolic process                                                          | mitochondrion;ribosome                                   | structural molecule activity                                                           | 1.346  | 0.407  | 0.30 |
| P25039 | Elongation factor G, mitochondrial [OS=Saccharomyces cerevisiae S288c]                                     | 850758 | MEF1; YLR069C          | cell organization and biogenesis;metabolic process                                                          | cytosol;mitochondrion                                    | catalytic activity;nucleotide binding;RNA binding                                      | 0.677  | 0.207  | 0.31 |
| P21954 | Isocitrate dehydrogenase [NADP], mitochondrial [OS=Saccharomyces cerevisiae S288c]                         | 851493 | IDP1; YDL066W          | metabolic process                                                                                           | mitochondrion                                            | catalytic activity;metal ion binding;nucleotide binding;protein binding                | 67.129 | 20.544 | 0.31 |
| P07257 | Cytochrome b-c1 complex subunit 2, mitochondrial [OS=Saccharomyces cerevisiae S288c]                       | 856321 | QCR2; YPR191W          | metabolic process;transport                                                                                 | membrane;mitochondrion                                   | catalytic activity;metal ion binding;protein binding;transporter activity              | 82.768 | 25.49  | 0.31 |

|          |                                                                                                              |        |                       |                                                                                                          |                                        |                                                                      |        |        |      |
|----------|--------------------------------------------------------------------------------------------------------------|--------|-----------------------|----------------------------------------------------------------------------------------------------------|----------------------------------------|----------------------------------------------------------------------|--------|--------|------|
| Q04172   | Sensitive to high expression protein 9, mitochondrial [OS=Saccharomyces cerevisiae S288c]                    | 852002 | SHE9; YDR393W         | cell organization and biogenesis                                                                         | membrane;mitochondrion                 |                                                                      | 0.269  | 0.083  | 0.31 |
| P25605   | Acetolactate synthase small subunit, mitochondrial [OS=Saccharomyces cerevisiae S288c]                       | 850348 | ILV6; YCL009C         | metabolic process;regulation of biological process                                                       | mitochondrion                          | catalytic activity;enzyme regulator activity                         | 9      | 2.793  | 0.31 |
| P33416   | Heat shock protein 78, mitochondrial [OS=Saccharomyces cerevisiae S288c]                                     | 851845 | HSP78; YDR258C        | cell organization and biogenesis;metabolic process;regulation of biological process;response to stimulus | mitochondrion;organelle lumen          | catalytic activity;nucleotide binding;protein binding                | 9.784  | 3.042  | 0.31 |
| P00447   | Superoxide dismutase [Mn], mitochondrial [OS=Saccharomyces cerevisiae S288c]                                 | 856399 | SOD2; YHR008C         | metabolic process;response to stimulus                                                                   | mitochondrion;organelle lumen          | antioxidant activity;catalytic activity;metal ion binding            | 6.017  | 1.894  | 0.31 |
| P36060   | NADH-cytochrome b5 reductase 2 [OS=Saccharomyces cerevisiae S288c]                                           | 853707 | MCR1; YKL150W         | metabolic process;response to stimulus                                                                   | membrane;mitochondrion                 | catalytic activity;protein binding                                   | 36.927 | 11.743 | 0.32 |
| P50945   | MICOS complex subunit MIC27 [OS=Saccharomyces cerevisiae S288c]                                              | 855623 | AIM37; MIC27; YNL100W | cell organization and biogenesis                                                                         | membrane;mitochondrion                 |                                                                      | 0.968  | 0.311  | 0.32 |
| P53220   | Mitochondrial import inner membrane translocase subunit TIM21 [OS=Saccharomyces cerevisiae S288c]            | 852921 | TIM21; YGR033C        | cell organization and biogenesis;transport                                                               | membrane;mitochondrion                 | protein binding                                                      | 0.968  | 0.311  | 0.32 |
| P40495   | Homoisocitrate dehydrogenase, mitochondrial [OS=Saccharomyces cerevisiae S288c]                              | 854714 | LYS12; YIL094C        | metabolic process                                                                                        | mitochondrion                          | catalytic activity;metal ion binding;nucleotide binding              | 10.007 | 3.217  | 0.32 |
| Q08179   | Mitochondrial distribution and morphology protein 38 [OS=Saccharomyces cerevisiae S288c]                     | 854130 | MDM38; YOL027C        | cell organization and biogenesis;cellular homeostasis;regulation of biological process;transport         | membrane;mitochondrion                 |                                                                      | 7.913  | 2.548  | 0.32 |
| Q03430   | 37S ribosomal protein RSM28, mitochondrial [OS=Saccharomyces cerevisiae S288c]                               | 852105 | RSM28; YDR494W        | cell organization and biogenesis;metabolic process                                                       | mitochondrion;ribosome                 | structural molecule activity                                         | 2.008  | 0.65   | 0.32 |
| Q00711   | Succinate dehydrogenase [ubiquinone] flavoprotein subunit, mitochondrial [OS=Saccharomyces cerevisiae S288c] | 853709 | SDH1; YKL148C         | metabolic process;transport                                                                              | membrane;mitochondrion                 | catalytic activity;nucleotide binding;protein binding                | 16.535 | 5.381  | 0.33 |
| P36151   | Uncharacterized protein YKR070W [OS=Saccharomyces cerevisiae S288c]                                          | 853944 | YKR070W; YKR070W      | metabolic process                                                                                        | mitochondrion                          |                                                                      | 1.336  | 0.438  | 0.33 |
| P38523   | GrpE protein homolog, mitochondrial [OS=Saccharomyces cerevisiae S288c]                                      | 854407 | MGE1; YOR232W         | metabolic process;regulation of biological process;transport                                             | membrane;mitochondrion;organelle lumen | enzyme regulator activity;nucleotide binding;protein binding         | 0.833  | 0.274  | 0.33 |
| P36013   | NAD-dependent malic enzyme, mitochondrial [OS=Saccharomyces cerevisiae S288c]                                | 853839 | MAE1; YKL029C         | metabolic process                                                                                        | mitochondrion;organelle lumen          | catalytic activity;metal ion binding;nucleotide binding              | 3.732  | 1.239  | 0.33 |
| P16387   | Pyruvate dehydrogenase E1 component subunit alpha, mitochondrial [OS=Saccharomyces cerevisiae S288c]         | 856925 | PDA1; YER178W         | cell growth;metabolic process                                                                            | mitochondrion;organelle lumen          | catalytic activity                                                   | 31.819 | 10.602 | 0.33 |
| P06208-1 | 2-isopropylmalate synthase [OS=Saccharomyces cerevisiae S288c]                                               | 855619 | LEU4; YNL104C         | metabolic process                                                                                        | cytoplasm;mitochondrion                | catalytic activity;protein binding                                   | 19.309 | 6.444  | 0.33 |
| P36520   | 54S ribosomal protein L10, mitochondrial [OS=Saccharomyces cerevisiae S288c]                                 | 855436 | MRPL10; YNL284C       | cell organization and biogenesis;metabolic process                                                       | mitochondrion;ribosome                 | structural molecule activity                                         | 0.73   | 0.245  | 0.34 |
| P04037   | cytochrome c oxidase subunit 4, mitochondrial [OS=Saccharomyces cerevisiae S288c]                            | 852688 | COX4; YGL187C         | cell organization and biogenesis;metabolic process;transport                                             | membrane;mitochondrion                 | catalytic activity;metal ion binding;transporter activity            | 42.288 | 14.199 | 0.34 |
| P51998   | 54S ribosomal protein yml6, mitochondrial [OS=Saccharomyces cerevisiae S288c]                                | 854983 | YML6; YML025C         | cell organization and biogenesis;metabolic process                                                       | mitochondrion;ribosome                 | RNA binding;structural molecule activity                             | 1.154  | 0.389  | 0.34 |
| P32902   | 37S ribosomal protein MRP4, mitochondrial [OS=Saccharomyces cerevisiae S288c]                                | 856384 | MRP4; YHL004W         | cell organization and biogenesis;metabolic process                                                       | mitochondrion;ribosome                 | structural molecule activity                                         | 1.371  | 0.468  | 0.34 |
| P38891   | Branched-chain-amino-acid aminotransferase, mitochondrial [OS=Saccharomyces cerevisiae S288c]                | 856615 | BAT1; YHR208W         | metabolic process;regulation of biological process;response to stimulus                                  | mitochondrion;organelle lumen          | catalytic activity                                                   | 17.738 | 6.305  | 0.36 |
| P00427   | Cytochrome c oxidase subunit 6, mitochondrial [OS=Saccharomyces cerevisiae S288c]                            | 856448 | COX6; YHR051W         | metabolic process;transport                                                                              | membrane;mitochondrion                 | catalytic activity;metal ion binding;transporter activity            | 2.162  | 0.778  | 0.36 |
| P81449   | ATP synthase subunit e, mitochondrial [OS=Saccharomyces cerevisiae S288c]                                    | 851922 | TIM11; YDR322C-A      | cell organization and biogenesis;metabolic process;transport                                             | membrane;mitochondrion                 | catalytic activity;structural molecule activity;transporter activity | 2.162  | 0.778  | 0.36 |
| P40098   | uncharacterized mitochondrial membrane protein FMP10 [OS=Saccharomyces cerevisiae S288c]                     | 856931 | FMP10; YER182W        |                                                                                                          | membrane;mitochondrion                 |                                                                      | 4.456  | 1.637  | 0.37 |
| P38077   | ATP synthase subunit gamma, mitochondrial [OS=Saccharomyces cerevisiae S288c]                                | 852327 | ATP3; YBR039W         | metabolic process;transport                                                                              | membrane;mitochondrion                 | catalytic activity;transporter activity                              | 27.48  | 10.103 | 0.37 |



|        |                                                                                                          |        |                  |                                                                                                        |                                                               |                                                                           |        |        |      |
|--------|----------------------------------------------------------------------------------------------------------|--------|------------------|--------------------------------------------------------------------------------------------------------|---------------------------------------------------------------|---------------------------------------------------------------------------|--------|--------|------|
| P25626 | 54S ribosomal protein IMG1, mitochondrial [OS=Saccharomyces cerevisiae S288c]                            | 850413 | IMG1; YCR046C    | cell organization and biogenesis;metabolic process                                                     | mitochondrion;ribosome                                        | structural molecule activity                                              | 1.894  | 0.701  | 0.37 |
| P08067 | cytochrome b-c1 complex subunit Rieske, mitochondrial [OS=Saccharomyces cerevisiae S288c]                | 856689 | RIP1; YEL024W    | metabolic process;transport                                                                            | membrane;mitochondrion                                        | catalytic activity;metal ion binding;transporter activity                 | 67.129 | 25.102 | 0.37 |
| P23644 | Mitochondrial import receptor subunit TOM40 [OS=Saccharomyces cerevisiae S288c]                          | 855243 | TOM40; YMR203W   | transport                                                                                              | cytosol;membrane;mitochondrion                                | protein binding;transporter activity                                      | 1.783  | 0.668  | 0.37 |
| Q02981 | ABC1 family protein YPL109C, mitochondrial [OS=Saccharomyces cerevisiae S288c]                           | 855995 | YPL109C; YPL109C |                                                                                                        | mitochondrion                                                 |                                                                           | 0.496  | 0.189  | 0.38 |
| P16451 | Pyruvate dehydrogenase complex protein X component, mitochondrial [OS=Saccharomyces cerevisiae S288c]    | 853107 | PDX1; YGR193C    | metabolic process                                                                                      | mitochondrion;organelle lumen                                 | catalytic activity;structural molecule activity                           | 4.055  | 1.555  | 0.38 |
| P40502 | Altered inheritance of mitochondria protein 19, mitochondrial [OS=Saccharomyces cerevisiae S288c]        | 854722 | AIM19; YIL087C   |                                                                                                        | membrane;mitochondrion                                        |                                                                           | 1.512  | 0.585  | 0.39 |
| P53881 | 54S ribosomal protein L22, mitochondrial [OS=Saccharomyces cerevisiae S288c]                             | 855544 | MRPL22; YNL177C  | cell organization and biogenesis;metabolic process                                                     | mitochondrion;ribosome                                        | RNA binding;structural molecule activity                                  | 1.404  | 0.551  | 0.39 |
| Q12480 | Probable electron transfer flavoprotein subunit alpha, mitochondrial [OS=Saccharomyces cerevisiae S288c] | 856112 | AIM45; YPR004C   | metabolic process;transport                                                                            | mitochondrion;organelle lumen                                 | catalytic activity;nucleotide binding                                     | 4.623  | 1.818  | 0.39 |
| P25372 | Thioredoxin-3, mitochondrial [OS=Saccharomyces cerevisiae S288c]                                         | 850444 | TRX3; YCR083W    | cellular homeostasis;metabolic process;regulation of biological process;response to stimulus;transport | cytoplasm;mitochondrion                                       | catalytic activity                                                        | 1.31   | 0.52   | 0.40 |
| Q01574 | acetyl-coenzyme A synthetase 1 [OS=Saccharomyces cerevisiae S288c]                                       | 851245 | ACS1; YAL054C    | cell organization and biogenesis;metabolic process                                                     | cytoplasm;cytosol;endoplasmic reticulum;mitochondrion;nucleus | catalytic activity;nucleotide binding                                     | 4.456  | 1.801  | 0.40 |
| P16622 | Ferrochelatase, mitochondrial [OS=Saccharomyces cerevisiae S288c]                                        | 854347 | HEM15; YOR176W   | metabolic process                                                                                      | membrane;mitochondrion                                        | catalytic activity                                                        | 7.111  | 2.899  | 0.41 |
| P40035 | Mitochondrial phosphate carrier protein 2 [OS=Saccharomyces cerevisiae S288c]                            | 856779 | PIC2; YER053C    | cellular homeostasis;metabolic process;transport                                                       | membrane;mitochondrion                                        | structural molecule activity;transporter activity                         | 1.069  | 0.438  | 0.41 |
| P00431 | cytochrome c peroxidase, mitochondrial [OS=Saccharomyces cerevisiae S288c]                               | 853940 | CCP1; YKR066C    | metabolic process;response to stimulus                                                                 | mitochondrion;organelle lumen                                 | antioxidant activity;catalytic activity;metal ion binding;protein binding | 1.031  | 0.425  | 0.41 |
| P52893 | probable alanine aminotransferase, mitochondrial [OS=Saccharomyces cerevisiae S288c]                     | 850778 | ALT1; YLR089C    | metabolic process                                                                                      | mitochondrion;organelle lumen                                 | catalytic activity                                                        | 2.282  | 0.951  | 0.42 |
| P07246 | Alcohol dehydrogenase 3, mitochondrial [OS=Saccharomyces cerevisiae S288c]                               | 855107 | ADH3; YMR083W    | metabolic process                                                                                      | mitochondrion;organelle lumen                                 | catalytic activity;metal ion binding                                      | 11.452 | 4.78   | 0.42 |
| Q03246 | 37S ribosomal protein S17, mitochondrial [OS=Saccharomyces cerevisiae S288c]                             | 855226 | MRPS17; YMR188C  | cell differentiation;cell organization and biogenesis;metabolic process                                | mitochondrion;ribosome                                        | RNA binding;structural molecule activity                                  | 0.931  | 0.389  | 0.42 |
| Q12349 | ATP synthase subunit H, mitochondrial [OS=Saccharomyces cerevisiae S288c]                                | 851002 | ATP14; YLR295C   | cell organization and biogenesis;metabolic process;transport                                           | membrane;mitochondrion                                        | catalytic activity;transporter activity                                   | 0.931  | 0.389  | 0.42 |
| Q12428 | Probable 2-methylcitrate dehydratase [OS=Saccharomyces cerevisiae S288c]                                 | 856108 | PDH1; YPR002W    | metabolic process                                                                                      | cytoplasm;membrane;mitochondrion                              | catalytic activity                                                        | 18.11  | 7.66   | 0.42 |
| P00890 | citrate synthase, mitochondrial [OS=Saccharomyces cerevisiae S288c]                                      | 855732 | CIT1; YNR001C    | metabolic process;transport                                                                            | cytosol;mitochondrion;organelle lumen                         | catalytic activity                                                        | 36.276 | 15.379 | 0.42 |
| Q07914 | mitochondrial import inner membrane translocase subunit TIM14 [OS=Saccharomyces cerevisiae S288c]        | 850694 | PAM18; YLR008C   | regulation of biological process;transport                                                             | membrane;mitochondrion                                        | enzyme regulator activity;protein binding;transporter activity            | 0.778  | 0.334  | 0.43 |
| P11914 | Mitochondrial-processing peptidase subunit alpha [OS=Saccharomyces cerevisiae S288c]                     | 856419 | MAS2; YHR024C    | metabolic process;transport                                                                            | membrane;mitochondrion;organelle lumen                        | catalytic activity;metal ion binding;protein binding                      | 0.738  | 0.318  | 0.43 |
| P31334 | 54S ribosomal protein L9, mitochondrial [OS=Saccharomyces cerevisiae S288c]                              | 853135 | MRPL9; YGR220C   | cell organization and biogenesis;metabolic process                                                     | mitochondrion;ribosome                                        | structural molecule activity                                              | 0.719  | 0.311  | 0.43 |
| Q12289 | mitochondrial carnitine carrier [OS=Saccharomyces cerevisiae S288c]                                      | 854267 | CRC1; YOR100C    | metabolic process;transport                                                                            | membrane;mitochondrion                                        | structural molecule activity;transporter activity                         | 1.683  | 0.73   | 0.43 |
| P49095 | Glycine dehydrogenase (Decarboxylating), mitochondrial [OS=Saccharomyces cerevisiae S288c]               | 855227 | GCV2; YMR189W    | metabolic process                                                                                      | cytosol;mitochondrion                                         | catalytic activity                                                        | 2.728  | 1.184  | 0.43 |
| P40215 | External NADH-ubiquinone oxidoreductase 1, mitochondrial [OS=Saccharomyces cerevisiae S288c]             | 855176 | NDE1; YMR145C    | metabolic process                                                                                      | mitochondrion                                                 | catalytic activity;nucleotide binding                                     | 7.297  | 3.184  | 0.44 |
| Q12283 | Malonyl CoA-acyl carrier protein transacylase, mitochondrial [OS=Saccharomyces cerevisiae S288c]         | 854396 | MCT1; YOR221C    | metabolic process                                                                                      | mitochondrion                                                 | catalytic activity                                                        | 0.668  | 0.292  | 0.44 |

|        |                                                                                                 |            |                                 |                                                                                                        |                                             |                                                                                     |            |            |      |
|--------|-------------------------------------------------------------------------------------------------|------------|---------------------------------|--------------------------------------------------------------------------------------------------------|---------------------------------------------|-------------------------------------------------------------------------------------|------------|------------|------|
| P19516 | Cytochrome c oxidase assembly protein COX11, mitochondrial [OS=Saccharomyces cerevisiae S288c]  | 85597<br>1 | COX11;<br>YPL132<br>W           | cell organization and biogenesis;metabolic process                                                     | membrane;mitochondrion;ribosome             | metal ion binding                                                                   | 0.62<br>4  | 0.274      | 0.44 |
| Q01163 | 37S ribosomal protein S23, mitochondrial [OS=Saccharomyces cerevisiae S288c]                    | 85274<br>8 | RSM23;<br>YGL129<br>C           | cell organization and biogenesis;metabolic process                                                     | mitochondrion;ribosome                      | catalytic activity;nucleotide binding;RNA binding;structural molecule activity      | 1.70<br>7  | 0.751      | 0.44 |
| P53969 | Sorting assembly machinery 50 kDa subunit [OS=Saccharomyces cerevisiae S288c]                   | 85570<br>5 | SAM50<br>;<br>YNL026<br>W       | cell organization and biogenesis;transport                                                             | membrane;mitochondrion                      | protein binding;transporter activity                                                | 0.61       | 0.269      | 0.44 |
| P43617 | Uncharacterized mitochondrial carrier YFR045W [OS=Saccharomyces cerevisiae S288c]               | 85060<br>6 | YFR045<br>W;<br>YFR045<br>W     | metabolic process;transport                                                                            | membrane;mitochondrion                      | structural molecule activity;transporter activity                                   | 0.58<br>5  | 0.259      | 0.44 |
| P05626 | ATP synthase subunit 4, mitochondrial [OS=Saccharomyces cerevisiae S288c]                       | 85602<br>7 | ATP4;<br>YPL078<br>C            | cell organization and biogenesis;metabolic process;transport                                           | membrane;mitochondrion                      | catalytic activity;transporter activity                                             | 5.81<br>3  | 2.594      | 0.45 |
| P23641 | mitochondrial phosphate carrier protein [OS=Saccharomyces cerevisiae S288c]                     | 85354<br>0 | MIR1;<br>YJR077<br>C            | metabolic process;transport                                                                            | membrane;mitochondrion                      | protein binding;structural molecule activity;transporter activity                   | 30.6<br>23 | 13.67<br>8 | 0.45 |
| P17695 | Glutaredoxin-2, mitochondrial [OS=Saccharomyces cerevisiae S288c]                               | 85212<br>4 | GRX2;<br>YDR51<br>3W            | cellular homeostasis;metabolic process;regulation of biological process;response to stimulus;transport | cytoplasm;cytosol;mitochondrion;nucl<br>eus | antioxidant activity;catalytic activity                                             | 0.52       | 0.233      | 0.45 |
| P43594 | MICOS complex subunit MIC19 [OS=Saccharomyces cerevisiae S288c]                                 | 85056<br>3 | AIM13;<br>MIC19;<br>YFR011<br>C | cell organization and biogenesis                                                                       | cytoplasm;membrane;mitochondrion            |                                                                                     | 0.52       | 0.233      | 0.45 |
| P09440 | C-1-tetrahydrofolate synthase, mitochondrial [OS=Saccharomyces cerevisiae S288c]                | 85237<br>8 | MIS1;<br>YBR084<br>W            | metabolic process                                                                                      | cytosol;mitochondrion                       | catalytic activity;nucleotide binding                                               | 1.98<br>8  | 0.9        | 0.45 |
| P40165 | NAD(P)H-hydrate epimerase [OS=Saccharomyces cerevisiae S288c]                                   | 85552<br>1 | YNL200<br>C;<br>YNL200<br>C     | metabolic process                                                                                      | cytoplasm;mitochondrion                     | catalytic activity;metal ion binding;nucleotide binding                             | 0.46<br>8  | 0.212      | 0.45 |
| Q03020 | iron sulfur cluster assembly protein 1, mitochondrial [OS=Saccharomyces cerevisiae S288c]       | 85596<br>8 | ISU1;<br>YPL135<br>W            | cell organization and biogenesis;cellular homeostasis;metabolic process                                | cytoplasm;mitochondrion;organelle lumen     | catalytic activity;metal ion binding;protein binding                                | 0.46<br>8  | 0.212      | 0.45 |
| P28834 | Isocitrate dehydrogenase [NAD] subunit 1, mitochondrial [OS=Saccharomyces cerevisiae S288c]     | 85569<br>1 | IDH1;<br>YNL037<br>C            | metabolic process;transport                                                                            | cytosol;mitochondrion;organelle lumen       | catalytic activity;metal ion binding;nucleotide binding;protein binding;RNA binding | 19.6<br>91 | 9          | 0.46 |
| P38169 | Kynurenine 3-monoxygenase [OS=Saccharomyces cerevisiae S288c]                                   | 85217<br>9 | BNA4;<br>YBL098<br>W            | metabolic process                                                                                      | membrane;mitochondrion                      | catalytic activity;nucleotide binding                                               | 0.37<br>4  | 0.172      | 0.46 |
| P25348 | 54S ribosomal protein L32, mitochondrial [OS=Saccharomyces cerevisiae S288c]                    | 85035<br>9 | MRPL3<br>2;<br>YCR003<br>W      | cell organization and biogenesis;metabolic process                                                     | membrane;mitochondrion;ribosome             | RNA binding;structural molecule activity                                            | 0.38<br>9  | 0.179      | 0.46 |
| P53212 | Probable transcriptional regulatory protein HAH1 [OS=Saccharomyces cerevisiae S288c]            | 85290<br>4 | YGR02<br>1W;<br>YGR02<br>1W     |                                                                                                        | mitochondrion                               |                                                                                     | 0.35<br>9  | 0.166      | 0.46 |
| P07342 | Acetolactate synthase catalytic subunit, mitochondrial [OS=Saccharomyces cerevisiae S288c]      | 85513<br>5 | ILV2;<br>YMR10<br>8W            | metabolic process                                                                                      | mitochondrion                               | catalytic activity;metal ion binding;nucleotide binding                             | 8.42<br>7  | 3.924      | 0.47 |
| Q12298 | uncharacterized ABC transporter ATP-binding protein YDR061W [OS=Saccharomyces cerevisiae S288c] | 85163<br>3 | YDR06<br>1W;<br>YDR06<br>1W     |                                                                                                        | mitochondrion                               | catalytic activity;nucleotide binding                                               | 0.26<br>6  | 0.125      | 0.47 |
| P40416 | Iron-sulfur clusters transporter ATM1, mitochondrial [OS=Saccharomyces cerevisiae S288c]        | 85534<br>7 | ATM1;<br>YMR30<br>1C            | cellular homeostasis;metabolic process;transport                                                       | membrane;mitochondrion                      | catalytic activity;nucleotide binding;transporter activity                          | 0.28<br>3  | 0.133      | 0.47 |
| P49954 | probable hydrolase NIT3 [OS=Saccharomyces cerevisiae S288c]                                     | 85106<br>5 | NIT3;<br>YLR351<br>C            | metabolic process                                                                                      | cytoplasm;mitochondrion                     | catalytic activity                                                                  | 0.27<br>4  | 0.129      | 0.47 |
| P14908 | Mitochondrial transcription factor 1 [OS=Saccharomyces cerevisiae S288c]                        | 85526<br>8 | MTF1;<br>YMR22<br>8W            | metabolic process;regulation of biological process                                                     | mitochondrion;organelle lumen               | catalytic activity;DNA binding;RNA binding                                          | 0.25<br>9  | 0.122      | 0.47 |
| P10834 | protein PET54 [OS=Saccharomyces cerevisiae S288c]                                               | 85313<br>7 | PET54;<br>YGR22<br>2W           | metabolic process;regulation of biological process                                                     | membrane;mitochondrion;organelle lumen      | nucleotide binding;RNA binding;translation regulator activity                       | 0.23<br>3  | 0.11       | 0.47 |
| P36528 | 54S ribosomal protein L17, mitochondrial [OS=Saccharomyces cerevisiae S288c]                    | 85546<br>9 | MRPL1<br>7;<br>YNL252<br>C      | cell organization and biogenesis;metabolic process                                                     | mitochondrion;ribosome                      | structural molecule activity                                                        | 0.23<br>3  | 0.11       | 0.47 |
| P11325 | Leucine--tRNA ligase, mitochondrial [OS=Saccharomyces cerevisiae S288c]                         | 85109<br>8 | NAM2;<br>YLR382<br>C            | cell organization and biogenesis;metabolic process;regulation of biological process                    | cytosol;mitochondrion;organelle lumen       | catalytic activity;nucleotide binding;RNA binding                                   | 0.25<br>4  | 0.12       | 0.47 |

|        |                                                                                                             |        |                        |                                                                                                          |                                                       |                                                                                |        |        |      |
|--------|-------------------------------------------------------------------------------------------------------------|--------|------------------------|----------------------------------------------------------------------------------------------------------|-------------------------------------------------------|--------------------------------------------------------------------------------|--------|--------|------|
| Q12166 | 2-isopropylmalate synthase 2, mitochondrial [OS=Saccharomyces cerevisiae S288c]                             | 854275 | LEU9; YOR108W          | metabolic process                                                                                        | mitochondrion                                         | catalytic activity;protein binding                                             | 4.367  | 2.065  | 0.47 |
| P53163 | 54S ribosomal protein L12, mitochondrial [OS=Saccharomyces cerevisiae S288c]                                | 852811 | MNP1; YGL068W          | cell organization and biogenesis;metabolic process                                                       | mitochondrion;ribosome                                | RNA binding;structural molecule activity                                       | 1.848  | 0.874  | 0.47 |
| Q06143 | mitochondrial dicarboxylate transporter [OS=Saccharomyces cerevisiae S288c]                                 | 851063 | DIC1; YLR348C          | metabolic process;transport                                                                              | membrane;mitochondrion                                | structural molecule activity;transporter activity                              | 1.154  | 0.551  | 0.48 |
| Q12031 | Mitochondrial 2-methylisocitrate lyase [OS=Saccharomyces cerevisiae S288c]                                  | 856114 | ICL2; YPR006C          | metabolic process                                                                                        | mitochondrion;organelle lumen                         | catalytic activity                                                             | 4.135  | 1.976  | 0.48 |
| Q08970 | Mitochondrial metal transporter 2 [OS=Saccharomyces cerevisiae S288c]                                       | 855877 | MMT2; YPL224C          | cellular homeostasis;regulation of biological process;response to stimulus;transport                     | membrane;mitochondrion                                | transporter activity                                                           | 0.186  | 0.089  | 0.48 |
| P32839 | Mitochondrial chaperone BCS1 [OS=Saccharomyces cerevisiae S288c]                                            | 851981 | BCS1; YDR375C          | cell organization and biogenesis;metabolic process;response to stimulus;transport                        | cytosol;membrane;mitochondrion                        | catalytic activity;nucleotide binding;transporter activity                     | 0.194  | 0.093  | 0.48 |
| Q06510 | Lysophosphatidylcholine acyltransferase [OS=Saccharomyces cerevisiae S288c]                                 | 856262 | TAZ1; YPR140W          | cell organization and biogenesis;metabolic process;transport                                             | membrane;mitochondrion                                | catalytic activity                                                             | 0.194  | 0.093  | 0.48 |
| P07236 | Threonine--tRNA ligase, mitochondrial [OS=Saccharomyces cerevisiae S288c]                                   | 853640 | MST1; YKL194C          | metabolic process                                                                                        | cytoplasm;mitochondrion;organelle lumen               | catalytic activity;nucleotide binding;RNA binding                              | 0.15   | 0.072  | 0.48 |
| P42940 | Probable electron transfer flavoprotein subunit beta [OS=Saccharomyces cerevisiae S288c]                    | 853121 | CIR1; YGR207C          | metabolic process;transport                                                                              | mitochondrion;organelle lumen                         |                                                                                | 5.494  | 2.652  | 0.48 |
| P00401 | Cytochrome c oxidase subunit 1 [OS=Saccharomyces cerevisiae S288c]                                          | 854598 | COX1; Q0045            | metabolic process;transport                                                                              | membrane;mitochondrion                                | catalytic activity;metal ion binding;transporter activity                      | 1.61   | 0.778  | 0.48 |
| P07256 | Cytochrome b-c1 complex subunit 1, mitochondrial [OS=Saccharomyces cerevisiae S288c]                        | 852235 | COR1; YBL045C          | metabolic process;transport                                                                              | membrane;mitochondrion                                | catalytic activity;metal ion binding;protein binding;transporter activity      | 24.551 | 11.915 | 0.49 |
| Q07349 | MIOREX complex component 9 [OS=Saccharomyces cerevisiae S288c]                                              | 851535 | YDL027C; MRX9; YDL027C |                                                                                                          | endoplasmic reticulum;membrane;mitochondrion          |                                                                                | 1.913  | 0.931  | 0.49 |
| P21801 | Succinate dehydrogenase [ubiquinone] iron-sulfur subunit, mitochondrial [OS=Saccharomyces cerevisiae S288c] | 850685 | SDH2; YLL041C          | metabolic process;transport                                                                              | membrane;mitochondrion                                | catalytic activity;metal ion binding                                           | 24.809 | 12.111 | 0.49 |
| P32445 | Single-stranded DNA-binding protein RIM1, mitochondrial [OS=Saccharomyces cerevisiae S288c]                 | 850395 | RIM1; YCR028C-A        | cell organization and biogenesis;metabolic process;regulation of biological process                      | mitochondrion                                         | DNA binding                                                                    | 3.642  | 1.783  | 0.49 |
| P08417 | fumarate hydratase, mitochondrial [OS=Saccharomyces cerevisiae S288c]                                       | 855866 | FUM1; YPL262W          | cell organization and biogenesis;metabolic process                                                       | cytoplasm;cytosol;mitochondrion;organelle lumen       | catalytic activity                                                             | 12.738 | 6.279  | 0.49 |
| P48526 | Isoleucine--tRNA ligase, mitochondrial [OS=Saccharomyces cerevisiae S288c]                                  | 856067 | ISM1; YPL040C          | cell organization and biogenesis;metabolic process;regulation of biological process                      | cytoplasm;cytosol;mitochondrion;organelle lumen       | catalytic activity;nucleotide binding                                          | 0.081  | 0.04   | 0.49 |
| P53326 | Uncharacterized protein YGR266W [OS=Saccharomyces cerevisiae S288c]                                         | 853182 | YGR266W; YGR266W       |                                                                                                          | membrane;mitochondrion                                |                                                                                | 0.602  | 0.299  | 0.50 |
| P35191 | DnaJ homolog 1, mitochondrial [OS=Saccharomyces cerevisiae S288c]                                           | 850530 | MDJ1; YFL016C          | cell organization and biogenesis;metabolic process;regulation of biological process;response to stimulus | mitochondrion;organelle lumen                         | enzyme regulator activity;metal ion binding;nucleotide binding;protein binding | 3.329  | 1.656  | 0.50 |
| P00175 | Cytochrome b2, mitochondrial [OS=Saccharomyces cerevisiae S288c]                                            | 854950 | CYB2; YML054C          | metabolic process;transport                                                                              | cytosol;membrane;mitochondrion;nucleus                | catalytic activity;metal ion binding;nucleotide binding                        | 0.995  | 0.496  | 0.50 |
| P15424 | ATP-dependent RNA helicase MSS116, mitochondrial [OS=Saccharomyces cerevisiae S288c]                        | 851775 | MSS116; YDR194C        | metabolic process;regulation of biological process                                                       | mitochondrion;organelle lumen                         | catalytic activity;nucleotide binding;RNA binding                              | 1.512  | 0.756  | 0.50 |
| P40047 | Aldehyde dehydrogenase 5, mitochondrial [OS=Saccharomyces cerevisiae S288c]                                 | 856804 | ALD5; YER073W          | metabolic process                                                                                        | mitochondrion;organelle lumen                         | catalytic activity                                                             | 3.146  | 1.581  | 0.50 |
| P54783 | D-arabinono-1,4-lactone oxidase [OS=Saccharomyces cerevisiae S288c]                                         | 854888 | ALO1; YML086C          | metabolic process;response to stimulus                                                                   | membrane;mitochondrion                                | catalytic activity;nucleotide binding                                          | 5.31   | 2.687  | 0.51 |
| P08466 | mitochondrial nuclease [OS=Saccharomyces cerevisiae S288c]                                                  | 853222 | NUC1; YJL208C          | cell death;metabolic process                                                                             | membrane;mitochondrion;nucleus                        | catalytic activity;metal ion binding                                           | 1.637  | 0.833  | 0.51 |
| Q04458 | Fatty aldehyde dehydrogenase HFD1 [OS=Saccharomyces cerevisiae S288c]                                       | 855137 | HFD1; YMR110C          | metabolic process                                                                                        | endoplasmic reticulum;endosome;membrane;mitochondrion | catalytic activity                                                             | 4.505  | 2.3    | 0.51 |
| P32473 | Pyruvate dehydrogenase E1 component subunit beta, mitochondrial [OS=Saccharomyces                           | 852522 | PDB1; YBR221C          | metabolic process                                                                                        | mitochondrion;organelle lumen                         | catalytic activity                                                             | 13.384 | 6.848  | 0.51 |

|        |                                                                                                                                                     |        |                        |                                                                                                                               |                                          |                                                                                     |        |        |      |
|--------|-----------------------------------------------------------------------------------------------------------------------------------------------------|--------|------------------------|-------------------------------------------------------------------------------------------------------------------------------|------------------------------------------|-------------------------------------------------------------------------------------|--------|--------|------|
|        | cerevisiae S288c]                                                                                                                                   |        |                        |                                                                                                                               |                                          |                                                                                     |        |        |      |
| P04710 | ADP,ATP carrier protein 1 [OS=Saccharomyces cerevisiae S288c]                                                                                       | 855078 | AAC1; YMR056C          | metabolic process;transport                                                                                                   | cytosol;membrane;mitochondrion           | structural molecule activity;transporter activity                                   | 13.384 | 6.848  | 0.51 |
| Q06089 | Uncharacterized mitochondrial outer membrane protein YPR098C [OS=Saccharomyces cerevisiae S288c]                                                    | 856213 | YPR098C; YPR098C       |                                                                                                                               | membrane;mitochondrion                   |                                                                                     | 9      | 4.623  | 0.51 |
| Q08822 | Probable electron transfer flavoprotein-ubiquinone oxidoreductase, mitochondrial [OS=Saccharomyces cerevisiae S288c]                                | 854538 | CIR2; YOR356W          | metabolic process;transport                                                                                                   | membrane;mitochondrion                   | catalytic activity;metal ion binding;nucleotide binding                             | 3.642  | 1.873  | 0.51 |
| P39522 | Dihydroxy-acid dehydratase, mitochondrial [OS=Saccharomyces cerevisiae S288c]                                                                       | 853473 | ILV3; YJR016C          | metabolic process                                                                                                             | mitochondrion                            | catalytic activity;metal ion binding                                                | 27.48  | 14.199 | 0.52 |
| P19262 | Dihydrolipoylysine-residue succinyltransferase component of 2-oxoglutarate dehydrogenase complex, mitochondrial [OS=Saccharomyces cerevisiae S288c] | 851726 | KGD2; YDR148C          | cell organization and biogenesis;metabolic process                                                                            | mitochondrion                            | catalytic activity;protein binding                                                  | 15.496 | 8.047  | 0.52 |
| P43635 | Citrate synthase 3, mitochondrial [OS=Saccharomyces cerevisiae S288c]                                                                               | 856107 | CIT3; YPR001W          | metabolic process                                                                                                             | mitochondrion                            | catalytic activity                                                                  | 4.995  | 2.594  | 0.52 |
| P00445 | Superoxide dismutase [Cu-Zn] [OS=Saccharomyces cerevisiae S288c]                                                                                    | 853568 | SOD1; YJR104C          | cell organization and biogenesis;cellular homeostasis;metabolic process;regulation of biological process;response to stimulus | cytoplasm;cytosol;mitochondrion;nucl eus | antioxidant activity;catalytic activity;metal ion binding;protein binding           | 2.511  | 1.31   | 0.52 |
| P25719 | Peptidyl-prolyl cis-trans isomerase C, mitochondrial [OS=Saccharomyces cerevisiae S288c]                                                            | 854897 | CPR3; YML078W          | cell death;metabolic process                                                                                                  | mitochondrion;organelle lumen            | catalytic activity                                                                  | 3.642  | 1.929  | 0.53 |
| P28241 | Isocitrate dehydrogenase [NAD] subunit 2, mitochondrial [OS=Saccharomyces cerevisiae S288c]                                                         | 854303 | IDH2; YOR136W          | metabolic process                                                                                                             | mitochondrion;organelle lumen            | catalytic activity;metal ion binding;nucleotide binding;protein binding;RNA binding | 9      | 4.78   | 0.53 |
| P37293 | N-terminal acetyltransferase 2 [OS=Saccharomyces cerevisiae S288c]                                                                                  | 853050 | NAT2; YGR147C          | metabolic process                                                                                                             | cytoplasm;mitochondrion                  | catalytic activity                                                                  | 0.73   | 0.389  | 0.53 |
| P32332 | Mitochondrial oxaloacetate transport protein [OS=Saccharomyces cerevisiae S288c]                                                                    | 853739 | OAC1; YKL120W          | metabolic process;transport                                                                                                   | membrane;mitochondrion                   | structural molecule activity;transporter activity                                   | 2.162  | 1.154  | 0.53 |
| P43616 | Cys-Gly metallopeptidase dug1 [OS=Saccharomyces cerevisiae S288c]                                                                                   | 850605 | DUG1; YFR044C          | metabolic process                                                                                                             | cytoplasm;mitochondrion;ribosome         | catalytic activity;metal ion binding                                                | 1.326  | 0.711  | 0.54 |
| Q07500 | External NADH-ubiquinone oxidoreductase 2, mitochondrial [OS=Saccharomyces cerevisiae S288c]                                                        | 851474 | NDE2; YDL085W          | metabolic process                                                                                                             | mitochondrion                            | catalytic activity;nucleotide binding                                               | 9.798  | 5.31   | 0.54 |
| P53266 | Cytochrome oxidase assembly protein SHY1 [OS=Saccharomyces cerevisiae S288c]                                                                        | 853009 | SHY1; YGR112W          | cell organization and biogenesis                                                                                              | membrane;mitochondrion                   | protein binding                                                                     | 0.978  | 0.532  | 0.54 |
| Q96VH5 | MICOS complex subunit Mic10 [OS=Saccharomyces cerevisiae S288c]                                                                                     | 850300 | MOS1; MIC10; YCL057C-A | cell organization and biogenesis                                                                                              | membrane;mitochondrion                   |                                                                                     | 1.683  | 0.931  | 0.55 |
| P19955 | 37S ribosomal protein YMR-31, mitochondrial [OS=Saccharomyces cerevisiae S288c]                                                                     | 850610 | YMR31; YFR049W         | cell organization and biogenesis;metabolic process                                                                            | mitochondrion;ribosome                   | catalytic activity;protein binding;structural molecule activity                     | 9      | 4.995  | 0.56 |
| P38825 | Protein TOM71 [OS=Saccharomyces cerevisiae S288c]                                                                                                   | 856517 | TOM71; YHR117W         | transport                                                                                                                     | membrane;mitochondrion                   | protein binding;transporter activity                                                | 0.914  | 0.512  | 0.56 |
| P36525 | 54S ribosomal protein L24, mitochondrial [OS=Saccharomyces cerevisiae S288c]                                                                        | 855231 | MRPL24; YMR193W        | cell organization and biogenesis;metabolic process                                                                            | mitochondrion;ribosome                   | RNA binding;structural molecule activity                                            | 1.512  | 0.848  | 0.56 |
| P40364 | Mitochondrial peculiar membrane protein 1 [OS=Saccharomyces cerevisiae S288c]                                                                       | 853379 | MPM1; YJL066C          |                                                                                                                               | membrane;mitochondrion                   |                                                                                     | 1.512  | 0.848  | 0.56 |
| P36147 | Presequence translocated-associated motor subunit pam17, mitochondrial [OS=Saccharomyces cerevisiae S288c]                                          | 853939 | PAM17; YKR065C         | transport                                                                                                                     | membrane;mitochondrion                   |                                                                                     | 1.371  | 0.778  | 0.57 |
| P39515 | mitochondrial import inner membrane translocase subunit Tim17 [OS=Saccharomyces cerevisiae S288c]                                                   | 853298 | TIM17; YJL143W         | cell organization and biogenesis;transport                                                                                    | membrane;mitochondrion                   | protein binding;transporter activity                                                | 1.371  | 0.778  | 0.57 |
| Q12233 | ATP synthase subunit g, mitochondrial [OS=Saccharomyces cerevisiae S288c]                                                                           | 856131 | ATP20; YPR020W         | cell organization and biogenesis;metabolic process;transport                                                                  | membrane;mitochondrion                   | catalytic activity;transporter activity                                             | 1.371  | 0.778  | 0.57 |
| P25349 | Flavoprotein-like protein YCP4 [OS=Saccharomyces cerevisiae S288c]                                                                                  | 850360 | YCP4; YCR004C          | metabolic process;regulation of biological process                                                                            | cytoplasm;membrane;mitochondrion         | catalytic activity;nucleotide binding;protein binding                               | 13.678 | 7.799  | 0.57 |
| P40341 | Mitochondrial respiratory chain complexes assembly protein YTA12 [OS=Saccharomyces cerevisiae S288c]                                                | 855114 | YTA12; YMR089C         | cell organization and biogenesis;metabolic process;response to stimulus;transport                                             | cytoplasm;membrane;mitochondrion         | catalytic activity;metal ion binding;nucleotide binding;protein                     | 1.913  | 1.096  | 0.57 |

|        |                                                                                                     |        |                      |                                                                                                                           |                                                 |                                                                            |        |        |      |
|--------|-----------------------------------------------------------------------------------------------------|--------|----------------------|---------------------------------------------------------------------------------------------------------------------------|-------------------------------------------------|----------------------------------------------------------------------------|--------|--------|------|
|        |                                                                                                     |        |                      |                                                                                                                           |                                                 | binding                                                                    |        |        |      |
| P22136 | ATPase expression protein 2, mitochondrial [OS=Saccharomyces cerevisiae S288c]                      | 855325 | AEP2; YMR282C        | metabolic process;regulation of biological process                                                                        | mitochondrion                                   | RNA binding                                                                | 0.506  | 0.292  | 0.58 |
| Q08818 | Meiotic sister-chromatid recombination protein 6, mitochondrial [OS=Saccharomyces cerevisiae S288c] | 854536 | MSC6; YOR354C        | metabolic process                                                                                                         | mitochondrion;organelle lumen                   | RNA binding                                                                | 0.506  | 0.292  | 0.58 |
| P00830 | ATP synthase subunit beta, mitochondrial [OS=Saccharomyces cerevisiae S288c]                        | 853585 | ATP2; YJR121W        | metabolic process;transport                                                                                               | cytosol;membrane;mitochondrion                  | catalytic activity;nucleotide binding;protein binding;transporter activity | 91.612 | 53.117 | 0.58 |
| Q00402 | Nuclear migration protein NUM1 [OS=Saccharomyces cerevisiae S288c]                                  | 851727 | NUM1; YDR150W        | cell organization and biogenesis;cellular component movement;metabolic process;regulation of biological process;transport | endoplasmic reticulum;mitochondrion             | catalytic activity;motor activity;protein binding                          | 0.134  | 0.078  | 0.58 |
| P40185 | Protein mmf1, mitochondrial [OS=Saccharomyces cerevisiae S288c]                                     | 854760 | MMF1; YIL051C        | cell organization and biogenesis;metabolic process                                                                        | mitochondrion;organelle lumen                   |                                                                            | 9      | 5.31   | 0.59 |
| P32898 | Mitochondrial presequence protease [OS=Saccharomyces cerevisiae S288c]                              | 852041 | CYM1; YDR430C        | metabolic process                                                                                                         | mitochondrion                                   | catalytic activity;metal ion binding                                       | 0.951  | 0.562  | 0.59 |
| P36112 | MICOS complex subunit Mic60 [OS=Saccharomyces cerevisiae S288c]                                     | 853886 | FCJ1; MIC60; YKR016W | cell organization and biogenesis;transport                                                                                | membrane;mitochondrion                          |                                                                            | 19.962 | 11.798 | 0.59 |
| P33311 | ATP-dependent permease MDL2, mitochondrial [OS=Saccharomyces cerevisiae S288c]                      | 855858 | MDL2; YPL270W        | response to stimulus;transport                                                                                            | membrane;mitochondrion                          | catalytic activity;nucleotide binding;transporter activity                 | 0.901  | 0.535  | 0.59 |
| P10507 | mitochondrial-processing peptidase subunit beta [OS=Saccharomyces cerevisiae S288c]                 | 850860 | MAS1; YLR163C        | metabolic process;transport                                                                                               | mitochondrion;organelle lumen                   | catalytic activity;metal ion binding;protein binding                       | 1.61   | 0.957  | 0.59 |
| P53721 | Respiratory supercomplex factor 2, mitochondrial [OS=Saccharomyces cerevisiae S288c]                | 855752 | RCF2; YNR018W        | cell organization and biogenesis                                                                                          | membrane;mitochondrion                          |                                                                            | 7.111  | 4.337  | 0.61 |
| P32317 | Protein AFG1 [OS=Saccharomyces cerevisiae S288c]                                                    | 856658 | AFG1; YEL052W        | cell organization and biogenesis;metabolic process;response to stimulus;transport                                         | membrane;mitochondrion                          | catalytic activity;nucleotide binding                                      | 1.154  | 0.711  | 0.62 |
| P41735 | 5-demethoxyubiquinone hydroxylase, mitochondrial [OS=Saccharomyces cerevisiae S288c]                | 854292 | CAT5; YOR125C        | metabolic process                                                                                                         | membrane;mitochondrion                          | catalytic activity;metal ion binding                                       | 0.54   | 0.334  | 0.62 |
| P53292 | 37S ribosomal protein S35, mitochondrial [OS=Saccharomyces cerevisiae S288c]                        | 853075 | MRP535; YGR165W      | cell organization and biogenesis;metabolic process                                                                        | mitochondrion;ribosome                          | structural molecule activity                                               | 1.754  | 1.089  | 0.62 |
| P07275 | Delta-1-pyrroline-5-carboxylate dehydrogenase, mitochondrial [OS=Saccharomyces cerevisiae S288c]    | 856432 | PUT2; YHR037W        | metabolic process                                                                                                         | membrane;mitochondrion;organelle lumen          | catalytic activity                                                         | 9.723  | 6.055  | 0.62 |
| P40053 | Altered inheritance of mitochondria protein 9, mitochondrial [OS=Saccharomyces cerevisiae S288c]    | 856813 | AIM9; YER080W        |                                                                                                                           | mitochondrion                                   |                                                                            | 3.348  | 2.086  | 0.62 |
| P53206 | putative cysteine synthase [OS=Saccharomyces cerevisiae S288c]                                      | 852895 | YGR012W; YGR012W     | metabolic process                                                                                                         |                                                 | catalytic activity                                                         | 1.555  | 0.978  | 0.63 |
| Q06485 | Autophagy-related protein 33 [OS=Saccharomyces cerevisiae S288c]                                    | 851070 | ATG33; YLR356W       | cell communication;metabolic process;response to stimulus                                                                 | membrane;mitochondrion                          |                                                                            | 2.162  | 1.371  | 0.63 |
| P29704 | squalene synthase [OS=Saccharomyces cerevisiae S288c]                                               | 856597 | ERG9; YHR190W        | metabolic process                                                                                                         | endoplasmic reticulum;membrane;mitochondrion    | catalytic activity                                                         | 0.35   | 0.222  | 0.63 |
| P41911 | Glycerol-3-phosphate dehydrogenase [NAD(+)] 2, mitochondrial [OS=Saccharomyces cerevisiae S288c]    | 854095 | GPD2; YOL059W        | metabolic process                                                                                                         | cytoplasm;cytosol;mitochondrion                 | catalytic activity;nucleotide binding;protein binding                      | 0.292  | 0.186  | 0.64 |
| P53140 | Protein RMD9, mitochondrial [OS=Saccharomyces cerevisiae S288c]                                     | 852771 | RMD9; YGL107C        | cell differentiation;metabolic process;regulation of biological process                                                   | membrane;mitochondrion                          | RNA binding                                                                | 1.047  | 0.668  | 0.64 |
| P21560 | Protein CBP3, mitochondrial [OS=Saccharomyces cerevisiae S288c]                                     | 855886 | CBP3; YPL215W        | cell organization and biogenesis;regulation of biological process                                                         | membrane;mitochondrion;ribosome                 |                                                                            | 0.304  | 0.194  | 0.64 |
| P39006 | Phosphatidylserine decarboxylase proenzyme 1, mitochondrial [OS=Saccharomyces cerevisiae S288c]     | 855552 | PSD1; YNL169C        | metabolic process;regulation of biological process                                                                        | membrane;mitochondrion                          | catalytic activity                                                         | 0.269  | 0.172  | 0.64 |
| P32843 | Mitochondrial escape protein 2 [OS=Saccharomyces cerevisiae S288c]                                  | 855348 | YME2; YMR302C        | cell organization and biogenesis;metabolic process                                                                        | membrane;mitochondrion                          | nucleotide binding;RNA binding                                             | 3.281  | 2.099  | 0.64 |
| P47127 | Altered inheritance of mitochondria protein 24, mitochondrial [OS=Saccharomyces cerevisiae S288c]   | 853543 | AIM24; YJR080C       | cell organization and biogenesis                                                                                          | mitochondrion                                   |                                                                            | 3.175  | 2.039  | 0.64 |
| P48527 | Tyrosine--tRNA ligase, mitochondrial [OS=Saccharomyces cerevisiae S288c]                            | 856007 | MSY1; YPL097W        | metabolic process                                                                                                         | cytoplasm;cytosol;mitochondrion;organelle lumen | catalytic activity;nucleotide binding;RNA binding                          | 0.233  | 0.15   | 0.64 |

|        |                                                                                                                |        |                         |                                                                                                          |                                              |                                                                             |        |        |      |
|--------|----------------------------------------------------------------------------------------------------------------|--------|-------------------------|----------------------------------------------------------------------------------------------------------|----------------------------------------------|-----------------------------------------------------------------------------|--------|--------|------|
| P42900 | Sigma-like sequence protein 1, mitochondrial [OS=Saccharomyces cerevisiae S288c]                               | 850830 | SLS1; YLR139C           | cell organization and biogenesis;metabolic process                                                       | membrane;mitochondrion                       | protein binding                                                             | 0.194  | 0.125  | 0.64 |
| P36775 | Lon protease homolog, mitochondrial [OS=Saccharomyces cerevisiae S288c]                                        | 852259 | PIM1; YBL022C           | cell organization and biogenesis;metabolic process;regulation of biological process;response to stimulus | cytoplasm;mitochondrion;organelle lumen      | catalytic activity;DNA binding;nucleotide binding;RNA binding               | 1.59   | 1.026  | 0.65 |
| P47052 | succinate dehydrogenase [ubiquinone] flavoprotein subunit 2, mitochondrial [OS=Saccharomyces cerevisiae S288c] | 853405 | YJL045W; YJL045W        | metabolic process;transport                                                                              | membrane;mitochondrion                       | catalytic activity;nucleotide binding                                       | 3.453  | 2.262  | 0.66 |
| Q05892 | MIOREX complex component 2 [OS=Saccharomyces cerevisiae S288c]                                                 | 850997 | YLR290C; COQ11; YLR290C | metabolic process                                                                                        | mitochondrion                                | catalytic activity                                                          | 2.652  | 1.738  | 0.66 |
| Q06493 | LETM1 domain-containing protein YLH47, mitochondrial [OS=Saccharomyces cerevisiae S288c]                       | 856243 | YLH47; YPR125W          | cell organization and biogenesis;transport                                                               | membrane;mitochondrion                       |                                                                             | 0.743  | 0.487  | 0.66 |
| P28817 | 3-hydroxyisobutyryl-CoA hydrolase, mitochondrial [OS=Saccharomyces cerevisiae S288c]                           | 851606 | EHD3; YDR036C           | metabolic process                                                                                        | mitochondrion                                | catalytic activity                                                          | 0.743  | 0.487  | 0.66 |
| P32795 | Mitochondrial inner membrane i-AAA protease supercomplex subunit YME1 [OS=Saccharomyces cerevisiae S288c]      | 856135 | YME1; YPR024W           | metabolic process;response to stimulus;transport                                                         | membrane;mitochondrion                       | catalytic activity;metal ion binding;nucleotide binding;protein binding     | 1.085  | 0.714  | 0.66 |
| P40012 | protoporphyrinogen oxidase [OS=Saccharomyces cerevisiae S288c]                                                 | 856733 | HEM14; YER014W          | metabolic process                                                                                        | membrane;mitochondrion                       | catalytic activity                                                          | 0.947  | 0.624  | 0.66 |
| P25087 | Sterol 24-C-methyltransferase [OS=Saccharomyces cerevisiae S288c]                                              | 855003 | ERG6; YML008C           | metabolic process                                                                                        | endoplasmic reticulum;membrane;mitochondrion | catalytic activity                                                          | 2.775  | 1.894  | 0.68 |
| P22354 | 54S ribosomal protein L20, mitochondrial [OS=Saccharomyces cerevisiae S288c]                                   | 853960 | MRPL20; YKR085C         | cell organization and biogenesis;metabolic process                                                       | mitochondrion;ribosome                       | structural molecule activity                                                | 0.931  | 0.638  | 0.69 |
| Q12029 | Probable mitochondrial transport protein fsf1 [OS=Saccharomyces cerevisiae S288c]                              | 854445 | FSF1; YOR271C           | transport                                                                                                | membrane;mitochondrion                       | transporter activity                                                        | 2.36   | 1.637  | 0.69 |
| Q99297 | Mitochondrial 2-oxodicarboxylate carrier 2 [OS=Saccharomyces cerevisiae S288c]                                 | 854397 | ODC2; YOR222W           | metabolic process;transport                                                                              | membrane;mitochondrion                       | structural molecule activity;transporter activity                           | 0.778  | 0.54   | 0.69 |
| P00044 | Cytochrome c iso-1 [OS=Saccharomyces cerevisiae S288c]                                                         | 853507 | CYC1; YJR048W           | metabolic process;transport                                                                              | mitochondrion                                | metal ion binding;protein binding                                           | 4.623  | 3.217  | 0.70 |
| P53889 | uncharacterized mitochondrial hydrolase FMP41 [OS=Saccharomyces cerevisiae S288c]                              | 855553 | FMP41; YNL168C          | metabolic process                                                                                        | mitochondrion                                | catalytic activity;metal ion binding                                        | 0.719  | 0.501  | 0.70 |
| P32387 | 54S ribosomal protein L41, mitochondrial [OS=Saccharomyces cerevisiae S288c]                                   | 852014 | MRP20; YDR405W          | cell organization and biogenesis;metabolic process                                                       | mitochondrion;ribosome                       | nucleotide binding;protein binding;RNA binding;structural molecule activity | 0.719  | 0.501  | 0.70 |
| P38071 | Enoyl-[acyl-carrier protein] reductase [NADPH, B-specific], mitochondrial [OS=Saccharomyces cerevisiae S288c]  | 852314 | ETR1; YBR026C           | metabolic process                                                                                        | mitochondrion;organelle lumen                | catalytic activity;DNA binding;metal ion binding                            | 9      | 6.305  | 0.70 |
| P07806 | Valine-tRNA ligase, mitochondrial [OS=Saccharomyces cerevisiae S288c]                                          | 852986 | VAS1; YGR094W           | metabolic process;regulation of biological process                                                       | cytoplasm;cytosol;mitochondrion              | catalytic activity;nucleotide binding                                       | 0.668  | 0.468  | 0.70 |
| P36521 | 54S ribosomal protein L11, mitochondrial [OS=Saccharomyces cerevisiae S288c]                                   | 851325 | MRPL11; YDL202W         | cell organization and biogenesis;metabolic process                                                       | mitochondrion;ribosome                       | structural molecule activity                                                | 0.624  | 0.438  | 0.70 |
| P38325 | Mitochondrial outer membrane protein OM14 [OS=Saccharomyces cerevisiae S288c]                                  | 852531 | OM14; YBR230C           | transport                                                                                                | membrane;mitochondrion                       |                                                                             | 18.307 | 12.895 | 0.70 |
| P38300 | Inner membrane mitoribosome receptor MBA1, mitochondrial [OS=Saccharomyces cerevisiae S288c]                   | 852483 | MBA1; YBR185C           | cell organization and biogenesis;regulation of biological process                                        | membrane;mitochondrion                       |                                                                             | 0.585  | 0.413  | 0.71 |
| P38072 | Protein SCO2, mitochondrial [OS=Saccharomyces cerevisiae S288c]                                                | 852312 | SCO2; YBR024W           | cell organization and biogenesis;cellular homeostasis;metabolic process;transport                        | membrane;mitochondrion                       | antioxidant activity;catalytic activity;metal ion binding                   | 0.551  | 0.389  | 0.71 |
| P48015 | Aminomethyltransferase, mitochondrial [OS=Saccharomyces cerevisiae S288c]                                      | 851582 | GCV1; YDR019C           | metabolic process                                                                                        | mitochondrion                                | catalytic activity;protein binding                                          | 11.217 | 8.047  | 0.72 |
| P36516 | 54S ribosomal protein L3, mitochondrial [OS=Saccharomyces cerevisiae S288c]                                    | 855039 | MRPL3; YMR024W          | cell organization and biogenesis;metabolic process;response to stimulus                                  | mitochondrion;nucleus;ribosome               | catalytic activity;RNA binding;structural molecule activity                 | 0.374  | 0.269  | 0.72 |
| P39965 | probable proline-tRNA ligase, mitochondrial [OS=Saccharomyces cerevisiae S288c]                                | 856820 | AIM10; YER087W          | metabolic process                                                                                        | cytoplasm;mitochondrion                      | catalytic activity;nucleotide binding;RNA binding                           | 0.266  | 0.194  | 0.73 |
| P25038 | Translation initiation factor IF-2, mitochondrial [OS=Saccharomyces cerevisiae S288c]                          | 854135 | IFM1; YOL023            | cell organization and biogenesis;metabolic process                                                       | mitochondrion;nucleus                        | catalytic activity;nucleotide                                               | 0.233  | 0.17   | 0.73 |

|        |                                                                                                     |        |                        |                                                                                     |                                              |                                                                         |        |        |      |
|--------|-----------------------------------------------------------------------------------------------------|--------|------------------------|-------------------------------------------------------------------------------------|----------------------------------------------|-------------------------------------------------------------------------|--------|--------|------|
|        | cerevisiae S288c]                                                                                   |        | W                      |                                                                                     |                                              | binding;RNA binding                                                     |        |        |      |
| Q01217 | Protein ARG5,6, mitochondrial [OS=Saccharomyces cerevisiae S288c]                                   | 856800 | ARG5,6 ; YER069W       | metabolic process;regulation of biological process                                  | cytoplasm;mitochondrion;organelle lumen      | catalytic activity;nucleotide binding;protein binding                   | 0.182  | 0.134  | 0.74 |
| P32904 | 54S ribosomal protein L6, mitochondrial [OS=Saccharomyces cerevisiae S288c]                         | 856552 | MRP16; YHR147C         | cell organization and biogenesis;metabolic process                                  | mitochondrion;ribosome                       | RNA binding;structural molecule activity                                | 1.054  | 0.778  | 0.74 |
| P40086 | Cytochrome c oxidase assembly protein cox15 [OS=Saccharomyces cerevisiae S288c]                     | 856884 | COX15; YER141W         | cell organization and biogenesis;metabolic process;transport                        | membrane;mitochondrion                       | catalytic activity;transporter activity                                 | 1.555  | 1.154  | 0.74 |
| P43567 | alanine-glyoxylate aminotransferase 1 [OS=Saccharomyces cerevisiae S288c]                           | 850514 | AGX1; YFL030W          | metabolic process                                                                   | cytosol;mitochondrion                        | catalytic activity                                                      | 2.162  | 1.61   | 0.74 |
| P40508 | Uncharacterized protein YIL077C [OS=Saccharomyces cerevisiae S288c]                                 | 854733 | YIL077C; YIL077C       |                                                                                     | mitochondrion                                |                                                                         | 0.896  | 0.668  | 0.75 |
| P40961 | prohibitin-1 [OS=Saccharomyces cerevisiae S288c]                                                    | 853033 | PHB1; YGR132C          | cell organization and biogenesis;metabolic process;regulation of biological process | membrane;mitochondrion                       | protein binding                                                         | 5.952  | 4.456  | 0.75 |
| P38885 | Altered inheritance of mitochondria protein 46, mitochondrial [OS=Saccharomyces cerevisiae S288c]   | 856606 | AIM46; YHR199C         |                                                                                     | mitochondrion                                | catalytic activity                                                      | 0.73   | 0.551  | 0.75 |
| P36101 | tRNA threonylcarbamoyladenosine dehydratase 2 [OS=Saccharomyces cerevisiae S288c]                   | 853841 | TCO2; YKL027W; YKL027W | metabolic process                                                                   | cytosol;membrane;mitochondrion               | catalytic activity;nucleotide binding                                   | 0.616  | 0.468  | 0.76 |
| Q03327 | Mitochondrial fusion and transport protein Ugo1 [OS=Saccharomyces cerevisiae S288c]                 | 852081 | UGO1; YDR470C          | cell organization and biogenesis;metabolic process                                  | membrane;mitochondrion                       | protein binding;structural molecule activity                            | 0.557  | 0.425  | 0.76 |
| P21375 | Fumarate reductase 2 [OS=Saccharomyces cerevisiae S288c]                                            | 853510 | OSM1; YJR051W          | metabolic process                                                                   | endoplasmic reticulum;mitochondrion          | catalytic activity;nucleotide binding                                   | 0.45   | 0.346  | 0.77 |
| P36066 | Protein MRG3-like [OS=Saccharomyces cerevisiae S288c]                                               | 853725 | YKL133C; YKL133C       | metabolic process                                                                   | membrane;mitochondrion                       | protein binding                                                         | 0.433  | 0.334  | 0.77 |
| Q06567 | ABC1 family protein MCP2 [OS=Saccharomyces cerevisiae S288c]                                        | 850955 | YLR253W; MCP2; YLR253W | cell organization and biogenesis                                                    | membrane;mitochondrion                       |                                                                         | 0.389  | 0.301  | 0.77 |
| P25374 | Cysteine desulfurase, mitochondrial [OS=Saccharomyces cerevisiae S288c]                             | 850343 | NFS1; YCL017C          | cell organization and biogenesis;cellular homeostasis;metabolic process             | mitochondrion;nucleus                        | catalytic activity;metal ion binding;protein binding                    | 2.3    | 1.783  | 0.78 |
| P39525 | 3-oxoacyl-[acyl-carrier-protein] synthase homolog [OS=Saccharomyces cerevisiae S288c]               | 856790 | CEM1; YER061C          | metabolic process                                                                   | mitochondrion                                | catalytic activity                                                      | 0.874  | 0.688  | 0.79 |
| P40008 | Protein FMP52, mitochondrial [OS=Saccharomyces cerevisiae S288c]                                    | 856721 | FMP52; YER004W         |                                                                                     | endoplasmic reticulum;membrane;mitochondrion | catalytic activity                                                      | 1.738  | 1.371  | 0.79 |
| P39925 | Mitochondrial respiratory chain complexes assembly protein AFG3 [OS=Saccharomyces cerevisiae S288c] | 856737 | AFG3; YER017C          | cell organization and biogenesis;metabolic process;response to stimulus;transport   | membrane;mitochondrion                       | catalytic activity;metal ion binding;nucleotide binding;protein binding | 0.823  | 0.65   | 0.79 |
| P32331 | Carrier protein YMC1, mitochondrial [OS=Saccharomyces cerevisiae S288c]                             | 856171 | YMC1; YPR058W          | metabolic process;transport                                                         | membrane;mitochondrion;vacuole               | structural molecule activity;transporter activity                       | 1.581  | 1.254  | 0.79 |
| P17558 | 37S ribosomal protein PET123, mitochondrial [OS=Saccharomyces cerevisiae S288c]                     | 854329 | PET123 ; YOR158W       | cell organization and biogenesis;metabolic process                                  | mitochondrion;ribosome                       | structural molecule activity                                            | 1.448  | 1.154  | 0.80 |
| P32860 | NifU-like protein, mitochondrial [OS=Saccharomyces cerevisiae S288c]                                | 853826 | NFU1; YKL040C          | cell organization and biogenesis;cellular homeostasis;metabolic process             | mitochondrion;organelle lumen                | metal ion binding                                                       | 2.652  | 2.162  | 0.82 |
| Q07651 | SUR7 family protein FMP45 [OS=Saccharomyces cerevisiae S288c]                                       | 851304 | FMP45; YDL222C         | cell differentiation;cell organization and biogenesis                               | membrane;mitochondrion                       |                                                                         | 7.377  | 6.017  | 0.82 |
| P07143 | Cytochrome c1, heme protein, mitochondrial [OS=Saccharomyces cerevisiae S288c]                      | 854231 | CYT1; YOR065W          | metabolic process;transport                                                         | cytosol;membrane;mitochondrion               | metal ion binding                                                       | 13.251 | 10.938 | 0.83 |
| Q03104 | Meiotic sister chromatid recombination protein 1 [OS=Saccharomyces cerevisiae S288c]                | 854911 | MSC1; YML128C          | metabolic process                                                                   | endoplasmic reticulum;membrane;mitochondrion |                                                                         | 5.31   | 4.412  | 0.83 |
| Q01852 | Mitochondrial import inner membrane translocase subunit TIM44 [OS=Saccharomyces cerevisiae S288c]   | 854790 | TIM44; YIL022W         | transport                                                                           | membrane;mitochondrion                       | nucleotide binding;protein binding                                      | 5.404  | 4.52   | 0.84 |
| P00927 | Threonine dehydratase, mitochondrial [OS=Saccharomyces cerevisiae S288c]                            | 856819 | ILV1; YER086W          | metabolic process                                                                   | cytoplasm;mitochondrion                      | catalytic activity                                                      | 2.257  | 1.894  | 0.84 |
| Q04013 | Citrate/oxoglutarate carrier protein [OS=Saccharomyces cerevisiae S288c]                            | 855282 | YHM2; YMR241W          | cell organization and biogenesis;metabolic process;transport                        | membrane;mitochondrion                       | DNA binding;structural molecule                                         | 4.012  | 3.467  | 0.86 |

|        |                                                                                                    |         |                      |                                                                                     |                                              |                                                                           |        |        |      |
|--------|----------------------------------------------------------------------------------------------------|---------|----------------------|-------------------------------------------------------------------------------------|----------------------------------------------|---------------------------------------------------------------------------|--------|--------|------|
|        |                                                                                                    |         |                      |                                                                                     |                                              | activity;transporter activity                                             |        |        |      |
| P38988 | Mitochondrial GTP/GDP carrier protein 1 [OS=Saccharomyces cerevisiae S288c]                        | 851329  | GGC1; YDL198C        | cell organization and biogenesis;cellular homeostasis;metabolic process;transport   | membrane;mitochondrion                       | structural molecule activity;transporter activity                         | 3.642  | 3.16   | 0.87 |
| P09457 | ATP synthase subunit 5, mitochondrial [OS=Saccharomyces cerevisiae S288c]                          | 851892  | ATP5; YDR298C        | metabolic process;transport                                                         | membrane;mitochondrion                       | catalytic activity;transporter activity                                   | 11.915 | 10.365 | 0.87 |
| P46681 | D-lactate dehydrogenase [cytochrome] 2, mitochondrial [OS=Saccharomyces cerevisiae S288c]          | 851376  | DLD2; YDL178W        | metabolic process                                                                   | mitochondrion;organelle lumen                | catalytic activity;nucleotide binding;protein binding                     | 1.264  | 1.102  | 0.87 |
| P50085 | Prohibitin-2 [OS=Saccharomyces cerevisiae S288c]                                                   | 853146  | PHB2; YGR231C        | cell organization and biogenesis;metabolic process;regulation of biological process | membrane;mitochondrion                       | protein binding                                                           | 4.337  | 3.806  | 0.88 |
| Q02776 | Mitochondrial import inner membrane translocase subunit TIM50 [OS=Saccharomyces cerevisiae S288c]  | 856042  | TIM50; YPL063W       | cell organization and biogenesis;metabolic process;transport                        | membrane;mitochondrion                       | catalytic activity;protein binding;transporter activity                   | 9.857  | 9      | 0.91 |
| Q08968 | UPF0061 protein FMP40 [OS=Saccharomyces cerevisiae S288c]                                          | 855879  | FMP40; YPL222W       |                                                                                     | mitochondrion                                | protein binding                                                           | 1.721  | 1.588  | 0.92 |
| P53598 | Succinyl-CoA ligase [ADP-forming] subunit alpha, mitochondrial [OS=Saccharomyces cerevisiae S288c] | 854310  | LSC1; YOR142W        | metabolic process                                                                   | cytosol;mitochondrion                        | catalytic activity;nucleotide binding                                     | 11.743 | 11.743 | 1.00 |
| P00410 | Cytochrome c oxidase subunit 2 [OS=Saccharomyces cerevisiae S288c]                                 | 854622  | COX2; Q0250          | metabolic process;transport                                                         | membrane;mitochondrion                       | catalytic activity;metal ion binding;protein binding;transporter activity | 3.642  | 3.642  | 1.00 |
| P40513 | Mitochondrial acidic protein MAM33 [OS=Saccharomyces cerevisiae S288c]                             | 854740  | MAM33; YIL070C       | metabolic process;regulation of biological process                                  | mitochondrion;organelle lumen                | translation regulator activity                                            | 2.831  | 2.831  | 1.00 |
| Q08023 | Protein FMP25, mitochondrial [OS=Saccharomyces cerevisiae S288c]                                   | 850766  | FMP25; YLR077W       | cell organization and biogenesis                                                    | membrane;mitochondrion                       |                                                                           | 0.719  | 0.719  | 1.00 |
| Q04728 | Arginine biosynthesis bifunctional protein Arg1, mitochondrial [OS=Saccharomyces cerevisiae S288c] | 855084  | ARG7; YMR062C        | metabolic process                                                                   | mitochondrion;organelle lumen                | catalytic activity                                                        | 0.52   | 0.52   | 1.00 |
| P38797 | Protein phosphatase 2C homolog 7, mitochondrial [OS=Saccharomyces cerevisiae S288c]                | 856475  | PTC7; YHR076W        | metabolic process                                                                   | mitochondrion                                | catalytic activity;metal ion binding;protein binding                      | 0.874  | 0.874  | 1.00 |
| P36517 | 54S ribosomal protein L4, mitochondrial [OS=Saccharomyces cerevisiae S288c]                        | 851160  | MRPL4; YLR439W       | cell organization and biogenesis;metabolic process                                  | mitochondrion;ribosome                       | structural molecule activity                                              | 0.874  | 0.874  | 1.00 |
| P38079 | protein YRO2 [OS=Saccharomyces cerevisiae S288c]                                                   | 852343  | YRO2; YBR054W        | transport                                                                           | endoplasmic reticulum;membrane;mitochondrion | transporter activity                                                      | 1.424  | 1.424  | 1.00 |
| P32611 | 54S ribosomal protein RML2, mitochondrial [OS=Saccharomyces cerevisiae S288c]                      | 856660  | RML2; YEL050C        | cell organization and biogenesis;metabolic process                                  | mitochondrion;ribosome                       | catalytic activity;RNA binding;structural molecule activity               | 0.638  | 0.638  | 1.00 |
| Q06668 | Methyltransferase OMS1, mitochondrial [OS=Saccharomyces cerevisiae S288c]                          | 851911  | OMS1; YDR316W        | metabolic process                                                                   | membrane;mitochondrion                       | catalytic activity                                                        | 0.389  | 0.389  | 1.00 |
| P32453 | Protein ATP11, mitochondrial [OS=Saccharomyces cerevisiae S288c]                                   | 855401  | ATP11; YNL315C       | cell organization and biogenesis                                                    | mitochondrion                                | protein binding                                                           | 0.585  | 0.585  | 1.00 |
| P35180 | mitochondrial import receptor subunit Tom20 [OS=Saccharomyces cerevisiae S288c]                    | 852973  | TOM20; YGR082W       | cell organization and biogenesis;transport                                          | membrane;mitochondrion                       | protein binding;transporter activity                                      | 0.425  | 0.425  | 1.00 |
| Q3E824 | Uncharacterized protein YOR020W-A [OS=Saccharomyces cerevisiae S288c]                              | 1466480 | YOR020W-A; YOR020W-A | metabolic process;transport                                                         | membrane;mitochondrion                       |                                                                           | 2.162  | 2.162  | 1.00 |
| P37299 | cytochrome b-c1 complex subunit 10 [OS=Saccharomyces cerevisiae S288c]                             | 856390  | QCR10; YHR001W-A     | metabolic process;transport                                                         | membrane;mitochondrion                       | catalytic activity;transporter activity                                   | 2.981  | 2.981  | 1.00 |
| P49334 | Mitochondrial import receptor subunit tom22 [OS=Saccharomyces cerevisiae S288c]                    | 855592  | TOM22; YNL131W       | cell organization and biogenesis;transport                                          | membrane;mitochondrion                       | protein binding;transporter activity                                      | 0.668  | 0.668  | 1.00 |
| P39112 | Exoribonuclease II, mitochondrial [OS=Saccharomyces cerevisiae S288c]                              | 855331  | DSS1; YMR287C        | metabolic process                                                                   | mitochondrion;organelle lumen                | catalytic activity;RNA binding                                            | 0.087  | 0.087  | 1.00 |
| P14693 | sorting assembly machinery 35 kDa subunit [OS=Saccharomyces cerevisiae S288c]                      | 856483  | SAM35; YHR083W       | cell organization and biogenesis;transport                                          | membrane;mitochondrion                       | protein binding                                                           | 0.334  | 0.334  | 1.00 |
| P25345 | Asparagine-tRNA ligase, mitochondrial [OS=Saccharomyces cerevisiae S288c]                          | 850388  | SLM5; YCR024C        | metabolic process                                                                   | cytoplasm;mitochondrion;organelle lumen      | catalytic activity;nucleotide binding                                     | 0.172  | 0.172  | 1.00 |
| P34222 | Peptidyl-tRNA hydrolase 2 [OS=Saccharomyces cerevisiae S288c]                                      | 852223  | PTH2; YBL057C        | regulation of biological process                                                    | cytoplasm;cytosol;membrane;mitochondrion     | catalytic activity;protein binding                                        | 0.425  | 0.425  | 1.00 |



|          |                                                                                                  |        |                         |                                                                                                                    |                                                 |                                                                   |       |       |      |
|----------|--------------------------------------------------------------------------------------------------|--------|-------------------------|--------------------------------------------------------------------------------------------------------------------|-------------------------------------------------|-------------------------------------------------------------------|-------|-------|------|
| P28737   | Protein MSP1 [OS=Saccharomyces cerevisiae S288c]                                                 | 852915 | MSP1; YGR028W           | cell organization and biogenesis;metabolic process;regulation of biological process;response to stimulus;transport | membrane;mitochondrion;nucleus                  | catalytic activity;nucleotide binding;protein binding;RNA binding | 0.413 | 0.413 | 1.00 |
| P21306   | ATP synthase subunit epsilon, mitochondrial [OS=Saccharomyces cerevisiae S288c]                  | 855857 | ATP15; YPL271W          | metabolic process;transport                                                                                        | membrane;mitochondrion                          | catalytic activity;transporter activity                           | 2.162 | 2.162 | 1.00 |
| Q01532-1 | Cysteine proteinase 1, mitochondrial [OS=Saccharomyces cerevisiae S288c]                         |        | MCY1                    | metabolic process;regulation of biological process;response to stimulus                                            | cytoplasm;mitochondrion                         | catalytic activity;DNA binding;RNA binding                        | 0.179 | 0.179 | 1.00 |
| Q03557   | Glutamyl-tRNA(Gln) amidotransferase subunit A, mitochondrial [OS=Saccharomyces cerevisiae S288c] | 855338 | HER2; YMR293C           | cell organization and biogenesis;metabolic process                                                                 | mitochondrion                                   | catalytic activity;nucleotide binding                             | 0.166 | 0.166 | 1.00 |
| P53732   | 37S ribosomal protein S12, mitochondrial [OS=Saccharomyces cerevisiae S288c]                     | 855772 | MRP512; YNR036C         | cell organization and biogenesis;metabolic process                                                                 | mitochondrion;ribosome                          | structural molecule activity                                      | 0.668 | 0.668 | 1.00 |
| P32792   | UPF0744 protein YSC83 [OS=Saccharomyces cerevisiae S288c]                                        | 856410 | YSC83; YHR017W          |                                                                                                                    | membrane;mitochondrion                          |                                                                   | 0.233 | 0.233 | 1.00 |
| P23833   | Protein SCO1, mitochondrial [OS=Saccharomyces cerevisiae S288c]                                  | 852325 | SCO1; YBR037C           | cell organization and biogenesis;cellular homeostasis;response to stimulus;transport                               | membrane;mitochondrion                          | antioxidant activity;catalytic activity;metal ion binding         | 0.468 | 0.468 | 1.00 |
| Q05648   | MIOREX complex component 10 [OS=Saccharomyces cerevisiae S288c]                                  | 851876 | YDR282C; MRX10; YDR282C |                                                                                                                    | membrane;mitochondrion                          |                                                                   | 0.222 | 0.222 | 1.00 |
| P40496   | 37S ribosomal protein S25, mitochondrial [OS=Saccharomyces cerevisiae S288c]                     | 854715 | RSM25; YIL093C          | cell organization and biogenesis;metabolic process                                                                 | mitochondrion;ribosome                          | structural molecule activity                                      | 0.468 | 0.468 | 1.00 |
| P50087   | MICOS subunit MIC26 [OS=Saccharomyces cerevisiae S288c]                                          | 853150 | MOS2; MIC26; YGR235C    | cell organization and biogenesis                                                                                   | membrane;mitochondrion                          |                                                                   | 0.638 | 0.638 | 1.00 |
| P33759   | 37S ribosomal protein S5, mitochondrial [OS=Saccharomyces cerevisiae S288c]                      | 852553 | MRP55; YBR251W          | cell organization and biogenesis;metabolic process                                                                 | mitochondrion;ribosome                          | RNA binding;structural molecule activity                          | 0.413 | 0.413 | 1.00 |
| P18496   | Mitochondrial ATPase complex subunit ATP10 [OS=Saccharomyces cerevisiae S288c]                   | 851109 | ATP10; YLR393W          | cell organization and biogenesis                                                                                   | cytoplasm;membrane;mitochondrion                | protein binding                                                   | 0.413 | 0.413 | 1.00 |
| P18900   | hexaprenyl pyrophosphate synthase, mitochondrial [OS=Saccharomyces cerevisiae S288c]             | 852288 | COQ1; YBR003W           | metabolic process                                                                                                  | membrane;mitochondrion                          | catalytic activity;metal ion binding;protein binding              | 0.166 | 0.166 | 1.00 |
| Q07821   | Iron-sulfur assembly protein 1 [OS=Saccharomyces cerevisiae S288c]                               | 850632 | ISA1; YLL027W           | cell organization and biogenesis;metabolic process                                                                 | mitochondrion;organelle lumen                   | metal ion binding;structural molecule activity                    | 0.136 | 0.136 | 1.00 |
| Q06630   | Mitochondrial homologous recombination protein 1 [OS=Saccharomyces cerevisiae S288c]             | 851890 | MHR1; YDR296W           | cell organization and biogenesis;metabolic process;regulation of biological process;response to stimulus           | mitochondrion;nucleus                           | catalytic activity;DNA binding;structural molecule activity       | 0.359 | 0.359 | 1.00 |
| P32606   | putative mitochondrial translation system component PET127 [OS=Saccharomyces cerevisiae S288c]   | 854182 | PET127; YOR017W         | cell organization and biogenesis;metabolic process;regulation of biological process                                | mitochondrion                                   |                                                                   | 0.099 | 0.099 | 1.00 |
| P08525   | Cytochrome b-c1 complex subunit 8 [OS=Saccharomyces cerevisiae S288c]                            | 853273 | QCR8; YJL166W           | metabolic process;transport                                                                                        | membrane;mitochondrion                          | catalytic activity;transporter activity                           | 0.585 | 0.585 | 1.00 |
| Q02608   | 37S ribosomal protein S16, mitochondrial [OS=Saccharomyces cerevisiae S288c]                     | 856094 | MRP516; YPL013C         | cell organization and biogenesis;metabolic process                                                                 | mitochondrion;ribosome                          | structural molecule activity                                      | 0.389 | 0.389 | 1.00 |
| P40581   | peroxiredoxin HYR1 [OS=Saccharomyces cerevisiae S288c]                                           | 854855 | HYR1; YIR037W           | metabolic process;response to stimulus                                                                             | cytoplasm;cytosol;mitochondrion;organelle lumen | antioxidant activity;catalytic activity                           | 0.259 | 0.259 | 1.00 |
| P38122   | 3-methyl-2-oxobutanoate hydroxymethyltransferase [OS=Saccharomyces cerevisiae S288c]             | 852474 | ECM31; YBR176W          | metabolic process                                                                                                  | mitochondrion                                   | catalytic activity                                                | 0.122 | 0.122 | 1.00 |
| P32463   | Acyl carrier protein, mitochondrial [OS=Saccharomyces cerevisiae S288c]                          | 853642 | ACP1; YKL192C           | metabolic process;transport                                                                                        | mitochondrion                                   |                                                                   | 0.259 | 0.259 | 1.00 |
| P04039   | Cytochrome c oxidase polypeptide VIII, mitochondrial [OS=Saccharomyces cerevisiae S288c]         | 851111 | COX8; YLR395C           | metabolic process;transport                                                                                        | membrane;mitochondrion                          | catalytic activity;transporter activity                           | 0.778 | 0.778 | 1.00 |
| Q05779   | Ubiquinone biosynthesis protein COQ9, mitochondrial [OS=Saccharomyces cerevisiae S288c]          | 850898 | COQ9; YLR201C           | metabolic process                                                                                                  | membrane;mitochondrion                          |                                                                   | 0.166 | 0.166 | 1.00 |
| P03879   | Intron-encoded RNA maturase bi4 [OS=Saccharomyces cerevisiae S288c]                              | 854582 | BI4; Q0120              | metabolic process                                                                                                  | membrane;mitochondrion                          | catalytic activity;RNA binding                                    | 0.179 | 0.179 | 1.00 |
| P46998   | mitochondrial membrane protein FMP33 [OS=Saccharomyces cerevisiae S288c]                         | 853279 | FMP33; YJL161W          |                                                                                                                    | membrane;mitochondrion                          |                                                                   | 0.334 | 0.334 | 1.00 |
| Q12487   | 54S ribosomal protein L23, mitochondrial [OS=Saccharomyces cerevisiae S288c]                     | 854321 | MRPL23; YOR15           | cell organization and biogenesis;metabolic process                                                                 | mitochondrion;ribosome;vacuole                  | RNA binding;structural molecule activity                          | 0.233 | 0.233 | 1.00 |

|        |                                                                                                           |        |                 |                                                                                               |                                                  |                                                                   |  |  |       |       |      |
|--------|-----------------------------------------------------------------------------------------------------------|--------|-----------------|-----------------------------------------------------------------------------------------------|--------------------------------------------------|-------------------------------------------------------------------|--|--|-------|-------|------|
|        |                                                                                                           |        | OW              |                                                                                               |                                                  |                                                                   |  |  |       |       |      |
| Q04689 | Altered inheritance of mitochondria protein 32 [OS=Saccharomyces cerevisiae S288c]                        | 854955 | AIM32; YML050W  |                                                                                               |                                                  |                                                                   |  |  | 0.11  | 0.11  | 1.00 |
| P07253 | cytochrome B pre-mRNA-processing protein 6 [OS=Saccharomyces cerevisiae S288c]                            | 852417 | CBP6; YBR120C   | cell organization and biogenesis;metabolic process;regulation of biological process           | mitochondrion;ribosome                           |                                                                   |  |  | 0.389 | 0.389 | 1.00 |
| P00045 | Cytochrome c iso-2 [OS=Saccharomyces cerevisiae S288c]                                                    | 856672 | CYC7; YEL039C   | metabolic process;transport                                                                   | mitochondrion                                    | metal ion binding                                                 |  |  | 0.259 | 0.259 | 1.00 |
| P53724 | 54S ribosomal protein L50, mitochondrial [OS=Saccharomyces cerevisiae S288c]                              | 855756 | MRPL50; YNR022C | cell organization and biogenesis;metabolic process                                            | mitochondrion;ribosome                           | structural molecule activity                                      |  |  | 0.585 | 0.585 | 1.00 |
| P27882 | Mitochondrial FAD-linked sulfhydryl oxidase erv1 [OS=Saccharomyces cerevisiae S288c]                      | 852916 | ERV1; YGR029W   | cellular homeostasis;metabolic process;response to stimulus;transport                         | mitochondrion                                    | catalytic activity;protein binding                                |  |  | 0.212 | 0.212 | 1.00 |
| P36046 | Mitochondrial intermembrane space import and assembly protein 40 [OS=Saccharomyces cerevisiae S288c]      | 853639 | MIA40; YKL195W  | cellular component movement;metabolic process;response to stimulus;transport                  | membrane;mitochondrion                           | catalytic activity;protein binding;transporter activity           |  |  | 1.783 | 1.783 | 1.15 |
| P32787 | Mitochondrial genome maintenance protein MGM101 [OS=Saccharomyces cerevisiae S288c]                       | 853609 | MGM101; YJR144W | cell organization and biogenesis;metabolic process;response to stimulus                       | chromosome;mitochondrion                         | DNA binding                                                       |  |  | 3.833 | 3.833 | 1.17 |
| P39987 | Heat shock protein SSC3, mitochondrial [OS=Saccharomyces cerevisiae S288c]                                | 856682 | ECM10; YEL030W  | cell organization and biogenesis;metabolic process;transport                                  | mitochondrion                                    | nucleotide binding;protein binding                                |  |  | 1.976 | 1.976 | 1.21 |
| P38297 | Mitofusin FZO1 [OS=Saccharomyces cerevisiae S288c]                                                        | 852477 | FZO1; YBR179C   | cell organization and biogenesis                                                              | membrane;mitochondrion                           | catalytic activity;nucleotide binding;protein binding             |  |  | 0.304 | 0.304 | 1.23 |
| P32266 | Dynamin-like GTPase MGM1, mitochondrial [OS=Saccharomyces cerevisiae S288c]                               | 854386 | MGM1; YOR211C   | cell organization and biogenesis                                                              | membrane;mitochondrion                           | catalytic activity;nucleotide binding;protein binding             |  |  | 0.228 | 0.228 | 1.27 |
| P38088 | Glycine-tRNA ligase 1, mitochondrial [OS=Saccharomyces cerevisiae S288c]                                  |        | GRS1            | metabolic process                                                                             | cytoplasm;mitochondrion;organelle lumen          | catalytic activity;nucleotide binding;protein binding             |  |  | 0.271 | 0.271 | 1.28 |
| P38771 | Ribosome-recycling factor, mitochondrial [OS=Saccharomyces cerevisiae S288c]                              | 856433 | RRF1; YHR038W   | cell organization and biogenesis;metabolic process                                            | mitochondrion                                    | RNA binding                                                       |  |  | 1.254 | 1.254 | 1.30 |
| Q05931 | Heat shock protein SSQ1, mitochondrial [OS=Saccharomyces cerevisiae S288c]                                | 851084 | SSQ1; YLR369W   | cell organization and biogenesis;metabolic process                                            | mitochondrion;organelle lumen                    | nucleotide binding;protein binding                                |  |  | 0.884 | 0.884 | 1.30 |
| P25573 | Mitochondrial inner membrane i-AAA protease supercomplex subunit MGR1 [OS=Saccharomyces cerevisiae S288c] | 850313 | MGR1; YCL044C   | metabolic process                                                                             | membrane;mitochondrion                           | protein binding                                                   |  |  | 0.557 | 0.557 | 1.31 |
| P36534 | 54S ribosomal protein L40, mitochondrial [OS=Saccharomyces cerevisiae S288c]                              | 855930 | MRPL40; YPL173W | cell organization and biogenesis;metabolic process                                            | mitochondrion;ribosome                           | protein binding;structural molecule activity                      |  |  | 0.778 | 0.778 | 1.33 |
| P33310 | ATP-dependent permease MDL1, mitochondrial [OS=Saccharomyces cerevisiae S288c]                            | 850885 | MDL1; YLR188W   | transport                                                                                     | membrane;mitochondrion                           | catalytic activity;nucleotide binding;transporter activity        |  |  | 0.725 | 0.725 | 1.37 |
| P32799 | Cytochrome c oxidase subunit 6A, mitochondrial [OS=Saccharomyces cerevisiae S288c]                        | 852684 | COX13; YGL191W  | cell organization and biogenesis;metabolic process;regulation of biological process;transport | membrane;mitochondrion                           | catalytic activity;enzyme regulator activity;transporter activity |  |  | 2.981 | 2.981 | 1.38 |
| P38323 | ATP-dependent clpX-like chaperone, mitochondrial [OS=Saccharomyces cerevisiae S288c]                      | 852528 | MCX1; YBR227C   | metabolic process                                                                             | membrane;mitochondrion;organelle lumen           | catalytic activity;nucleotide binding                             |  |  | 0.311 | 0.311 | 1.38 |
| Q08223 | Altered inheritance of mitochondria protein 39, mitochondrial [OS=Saccharomyces cerevisiae S288c]         | 854103 | AIM39; YOL053W  |                                                                                               | cytosol;membrane;mitochondrion                   |                                                                   |  |  | 0.359 | 0.359 | 1.39 |
| P53230 | Phosphatidate cytidyltransferase, mitochondrial [OS=Saccharomyces cerevisiae S288c]                       | 852937 | TAM41; YGR046W  | metabolic process                                                                             | membrane;mitochondrion;organelle lumen           | catalytic activity                                                |  |  | 0.407 | 0.407 | 1.39 |
| P48360 | Probable NADPH:adrenodoxin oxidoreductase, mitochondrial [OS=Saccharomyces cerevisiae S288c]              | 851982 | ARH1; YDR376W   | cellular homeostasis;metabolic process;transport                                              | cytoplasm;membrane;mitochondrion;organelle lumen | catalytic activity                                                |  |  | 0.25  | 0.25  | 1.56 |
| P47140 | Altered inheritance rate of mitochondria protein 25 [OS=Saccharomyces cerevisiae S288c]                   | 853563 | AIM25; YJR100C  | cell organization and biogenesis                                                              | membrane;mitochondrion                           | transporter activity                                              |  |  | 0.369 | 0.369 | 1.58 |
| P36163 | mitochondrial metalloendopeptidase OMA1 [OS=Saccharomyces cerevisiae S288c]                               | 853962 | OMA1; YKR087C   | metabolic process                                                                             | membrane;mitochondrion                           | catalytic activity;metal ion binding                              |  |  | 0.389 | 0.389 | 1.59 |
| P42847 | 37S ribosomal protein S18, mitochondrial [OS=Saccharomyces cerevisiae S288c]                              | 855410 | MRPS18; YNL306W | cell organization and biogenesis;metabolic process                                            | mitochondrion;ribosome                           | RNA binding;structural molecule activity                          |  |  | 0.54  | 0.54  | 1.62 |
| Q03798 | Altered inheritance of mitochondria protein 36, mitochondrial [OS=Saccharomyces cerevisiae S288c]         | 855189 | AIM36; YMR157C  |                                                                                               | membrane;mitochondrion                           |                                                                   |  |  | 0.833 | 0.833 | 1.90 |

|        |                                                                                    |        |                  |                                                                                                  |                                                 |                                                         |       |       |      |
|--------|------------------------------------------------------------------------------------|--------|------------------|--------------------------------------------------------------------------------------------------|-------------------------------------------------|---------------------------------------------------------|-------|-------|------|
| Q12204 | Probable phospholipase YOR022C, mitochondrial [OS=Saccharomyces cerevisiae S288c]  | 854187 | YOR022C; YOR022C | metabolic process                                                                                | mitochondrion                                   | catalytic activity;metal ion binding                    | 0.054 | 0.11  | 2.04 |
| P22438 | Methionine--tRNA ligase, mitochondrial [OS=Saccharomyces cerevisiae S288c]         | 853081 | MSM1; YGR171C    | metabolic process                                                                                | cytoplasm;cytosol;mitochondrion;organelle lumen | catalytic activity;nucleotide binding                   | 0.066 | 0.136 | 2.06 |
| P38127 | mitochondrial carrier protein RIM2 [OS=Saccharomyces cerevisiae S288c]             | 852491 | RIM2; YBR192W    | cell organization and biogenesis;metabolic process;transport                                     | membrane;mitochondrion                          | structural molecule activity;transporter activity       | 0.585 | 1.239 | 2.12 |
| P25270 | rRNA methyltransferase 1, mitochondrial [OS=Saccharomyces cerevisiae S288c]        | 854376 | MRM1; YOR201C    | metabolic process                                                                                | mitochondrion                                   | catalytic activity;RNA binding                          | 0.129 | 0.274 | 2.12 |
| P38816 | thioredoxin reductase 2, mitochondrial [OS=Saccharomyces cerevisiae S288c]         | 856506 | TRR2; YHR106W    | cellular homeostasis;metabolic process;regulation of biological process;response to stimulus     | cytoplasm;mitochondrion                         | antioxidant activity;catalytic activity                 | 0.136 | 0.292 | 2.15 |
| P39722 | Mitochondrial Rho GTPase 1 [OS=Saccharomyces cerevisiae S288c]                     | 851249 | GEM1; YAL048C    | cell organization and biogenesis;regulation of biological process;response to stimulus;transport | membrane;mitochondrion                          | catalytic activity;metal ion binding;nucleotide binding | 0.059 | 0.189 | 3.20 |
| Q04935 | Cytochrome c oxidase protein 20, mitochondrial [OS=Saccharomyces cerevisiae S288c] | 851817 | COX20; YDR231C   | cell organization and biogenesis;metabolic process                                               | membrane;mitochondrion                          | protein binding                                         | 0.194 | 0.701 | 3.61 |
| P38705 | Serine--tRNA ligase, mitochondrial [OS=Saccharomyces cerevisiae S288c]             | 856402 | DIA4; YHR011W    | metabolic process                                                                                | cytoplasm;mitochondrion;organelle lumen         | catalytic activity;nucleotide binding                   | 0.072 | 0.322 | 4.47 |

**Supplemental Table S10. The relative concentrations of proteins in mitochondria purified from WT or *ups2Δ* cells cultured without LCA.** Mitochondria were purified from WT or *ups2Δ* cells recovered on day 2 of cell culturing without LCA. Mass spectrometry-based identification and quantitation of proteins recovered in purified mitochondria were performed as described in Materials and methods. The exponentially modified protein abundance index (emPAI) provided by the "Proteome Discoverer" software was used to calculate the relative abundance of mitochondrial proteins between specified datasets. Data on the relative concentrations of mitochondrial proteins are presented as means of 2 independent experiments.

| Accession | Description                                                                                         | Entre z Gene ID | Gene ID          | Biological Process                                                                                          | Cellular Component                                          | Molecular Function                                                           | emPAI WT | emPAI <i>ups2</i> | Ratio <i>ups2</i> / WT |
|-----------|-----------------------------------------------------------------------------------------------------|-----------------|------------------|-------------------------------------------------------------------------------------------------------------|-------------------------------------------------------------|------------------------------------------------------------------------------|----------|-------------------|------------------------|
| P00431    | cytochrome c peroxidase, mitochondrial [OS= <i>Saccharomyces cerevisiae</i> S288c]                  | 853940          | CCP1; YKR066C    | metabolic process; response to stimulus                                                                     | mitochondrion; organelle lumen                              | antioxidant activity; catalytic activity; metal ion binding; protein binding | 2.162    | 0.093             | 0.04                   |
| P39522    | Dihydroxy-acid dehydratase, mitochondrial [OS= <i>Saccharomyces cerevisiae</i> S288c]               | 853473          | ILV3; YJR016C    | metabolic process                                                                                           | mitochondrion                                               | catalytic activity; metal ion binding                                        | 39.37    | 2.054             | 0.05                   |
| P25605    | Acetolactate synthase small subunit, mitochondrial [OS= <i>Saccharomyces cerevisiae</i> S288c]      | 850348          | ILV6; YCL009C    | metabolic process; regulation of biological process                                                         | mitochondrion                                               | catalytic activity; enzyme regulator activity                                | 11.743   | 0.624             | 0.05                   |
| Q06678    | 54S ribosomal protein L35, mitochondrial [OS= <i>Saccharomyces cerevisiae</i> S288c]                | 851921          | MRPL35; YDR322W  | cell organization and biogenesis; metabolic process                                                         | mitochondrion; ribosome                                     | structural molecule activity                                                 | 1.424    | 0.093             | 0.07                   |
| P19955    | 37S ribosomal protein YMR-31, mitochondrial [OS= <i>Saccharomyces cerevisiae</i> S288c]             | 850610          | YMR31; YFR049W   | cell organization and biogenesis; metabolic process                                                         | mitochondrion; ribosome                                     | catalytic activity; protein binding; structural molecule activity            | 15.681   | 1.154             | 0.07                   |
| P53219    | Abhydrolase domain-containing protein IMO32 [OS= <i>Saccharomyces cerevisiae</i> S288c]             | 852919          | IMO32; YGR031W   | metabolic process; transport                                                                                | mitochondrion                                               | catalytic activity                                                           | 1.404    | 0.116             | 0.08                   |
| P81449    | ATP synthase subunit e, mitochondrial [OS= <i>Saccharomyces cerevisiae</i> S288c]                   | 851922          | TIM11; YDR322C-A | cell organization and biogenesis; metabolic process; transport                                              | membrane; mitochondrion                                     | catalytic activity; structural molecule activity; transporter activity       | 9        | 0.778             | 0.09                   |
| P11914    | Mitochondrial-processing peptidase subunit alpha [OS= <i>Saccharomyces cerevisiae</i> S288c]        | 856419          | MAS2; YHR024C    | metabolic process; transport                                                                                | membrane; mitochondrion; organelle lumen                    | catalytic activity; metal ion binding; protein binding                       | 2.311    | 0.202             | 0.09                   |
| Q06892    | NADH kinase POSS, mitochondrial [OS= <i>Saccharomyces cerevisiae</i> S288c]                         | 855913          | POS5; YPL188W    | metabolic process; response to stimulus                                                                     | mitochondrion; organelle lumen                              | catalytic activity; nucleotide binding                                       | 2.511    | 0.233             | 0.09                   |
| P39676    | Flavoheмоprotein [OS= <i>Saccharomyces cerevisiae</i> S288c]                                        | 853149          | YHB1; YGR234W    | metabolic process; response to stimulus                                                                     | cytoplasm; cytosol; mitochondrion; nucleus; organelle lumen | catalytic activity; metal ion binding; protein binding                       | 4.179    | 0.389             | 0.09                   |
| P37267    | Assembly factor cbp4 [OS= <i>Saccharomyces cerevisiae</i> S288c]                                    |                 | CBP4             | cell organization and biogenesis                                                                            | membrane; mitochondrion                                     |                                                                              | 5.579    | 0.52              | 0.09                   |
| P25039    | Elongation factor G, mitochondrial [OS= <i>Saccharomyces cerevisiae</i> S288c]                      | 850758          | MEF1; YLR069C    | cell organization and biogenesis; metabolic process                                                         | cytosol; mitochondrion                                      | catalytic activity; nucleotide binding; RNA binding                          | 1.024    | 0.099             | 0.10                   |
| P32445    | Single-stranded DNA-binding protein RIM1, mitochondrial [OS= <i>Saccharomyces cerevisiae</i> S288c] | 850395          | RIM1; YCR028C-A  | cell organization and biogenesis; metabolic process; regulation of biological process                       | mitochondrion                                               | DNA binding                                                                  | 6.743    | 0.668             | 0.10                   |
| P38088    | Glycine--tRNA ligase 1, mitochondrial [OS= <i>Saccharomyces cerevisiae</i> S288c]                   |                 | GRS1             | metabolic process                                                                                           | cytoplasm; mitochondrion; organelle lumen                   | catalytic activity; nucleotide binding; protein binding                      | 0.468    | 0.049             | 0.10                   |
| Q02486    | ARS-binding factor 2, mitochondrial [OS= <i>Saccharomyces cerevisiae</i> S288c]                     | 855094          | ABF2; YMR072W    | cell organization and biogenesis; metabolic process; regulation of biological process                       | chromosome; mitochondrion; nucleus                          | DNA binding                                                                  | 69.17    | 7.377             | 0.11                   |
| P08525    | Cytochrome b-c1 complex subunit 8 [OS= <i>Saccharomyces cerevisiae</i> S288c]                       | 853273          | QCR8; YJL166W    | metabolic process; transport                                                                                | membrane; mitochondrion                                     | catalytic activity; transporter activity                                     | 5.31     | 0.585             | 0.11                   |
| P33416    | Heat shock protein 78, mitochondrial [OS= <i>Saccharomyces cerevisiae</i> S288c]                    | 851845          | HSP78; YDR258C   | cell organization and biogenesis; metabolic process; regulation of biological process; response to stimulus | mitochondrion; organelle lumen                              | catalytic activity; nucleotide binding; protein binding                      | 12.525   | 1.383             | 0.11                   |
| P23180    | Probable oxidoreductase AIM17 [OS= <i>Saccharomyces cerevisiae</i> S288c]                           | 856365          | AIM17; YHL021C   | cell organization and biogenesis; metabolic process                                                         | mitochondrion                                               | catalytic activity; metal ion binding                                        | 9        | 0.995             | 0.11                   |

|        |                                                                                                            |        |                  |                                                                                                                               |                                        |                                                                                |        |       |      |
|--------|------------------------------------------------------------------------------------------------------------|--------|------------------|-------------------------------------------------------------------------------------------------------------------------------|----------------------------------------|--------------------------------------------------------------------------------|--------|-------|------|
| Q02784 | Monothiol glutaredoxin-5, mitochondrial [OS=Saccharomyces cerevisiae S288c]                                | 856048 | GRX5; YPL059W    | cell organization and biogenesis;cellular homeostasis;metabolic process;regulation of biological process;response to stimulus | mitochondrion;organelle lumen          | catalytic activity;metal ion binding                                           | 2.594  | 0.292 | 0.11 |
| P00128 | Cytochrome b-c1 complex subunit 7 [OS=Saccharomyces cerevisiae S288c]                                      | 852142 | QCR7; YDR529C    | cell organization and biogenesis;metabolic process;transport                                                                  | membrane;mitochondrion                 | catalytic activity;transporter activity                                        | 15.681 | 1.783 | 0.11 |
| P38771 | Ribosome-recycling factor, mitochondrial [OS=Saccharomyces cerevisiae S288c]                               | 856433 | RRF1; YHR038W    | cell organization and biogenesis;metabolic process                                                                            | mitochondrion                          | RNA binding                                                                    | 1.254  | 0.145 | 0.12 |
| P32898 | Mitochondrial presequence protease [OS=Saccharomyces cerevisiae S288c]                                     | 852041 | CYM1; YDR430C    | metabolic process                                                                                                             | mitochondrion                          | catalytic activity;metal ion binding                                           | 2.162  | 0.25  | 0.12 |
| Q12031 | Mitochondrial 2-methylisocitrate lyase [OS=Saccharomyces cerevisiae S288c]                                 | 856114 | ICL2; YPR006C    | metabolic process                                                                                                             | mitochondrion;organelle lumen          | catalytic activity                                                             | 7.859  | 0.947 | 0.12 |
| P06168 | ketol-acid reductoisomerase, mitochondrial [OS=Saccharomyces cerevisiae S288c]                             | 851069 | ILV5; YLR355C    | cell organization and biogenesis;metabolic process                                                                            | mitochondrion                          | catalytic activity;DNA binding;metal ion binding                               | 28.126 | 3.394 | 0.12 |
| P21954 | Isocitrate dehydrogenase [NADP], mitochondrial [OS=Saccharomyces cerevisiae S288c]                         | 851493 | IDP1; YDL066W    | metabolic process                                                                                                             | mitochondrion                          | catalytic activity;metal ion binding;nucleotide binding;protein binding        | 35.869 | 4.412 | 0.12 |
| P40530 | [Pyruvate dehydrogenase (acetyl-transferring)] kinase 1, mitochondrial [OS=Saccharomyces cerevisiae S288c] | 854769 | PKP1; YIL042C    | metabolic process                                                                                                             | mitochondrion;organelle lumen          | catalytic activity;nucleotide binding;protein binding                          | 0.931  | 0.116 | 0.12 |
| P10834 | protein PET54 [OS=Saccharomyces cerevisiae S288c]                                                          | 853137 | PET54; YGR222W   | metabolic process;regulation of biological process                                                                            | membrane;mitochondrion;organelle lumen | nucleotide binding;RNA binding;translation regulator activity                  | 0.874  | 0.11  | 0.13 |
| P00927 | Threonine dehydratase, mitochondrial [OS=Saccharomyces cerevisiae S288c]                                   | 856819 | ILV1; YER086W    | metabolic process                                                                                                             | cytoplasm;mitochondrion                | catalytic activity                                                             | 3.375  | 0.425 | 0.13 |
| P12687 | 54S ribosomal protein L2, mitochondrial [OS=Saccharomyces cerevisiae S288c]                                | 855727 | MRP7; YNL005C    | cell organization and biogenesis;metabolic process                                                                            | mitochondrion;ribosome                 | catalytic activity;RNA binding;structural molecule activity                    | 1.848  | 0.233 | 0.13 |
| P39726 | Glycine cleavage system H protein, mitochondrial [OS=Saccharomyces cerevisiae S288c]                       | 851254 | GCV3; YAL044C    | metabolic process                                                                                                             | mitochondrion                          | catalytic activity                                                             | 9      | 1.154 | 0.13 |
| P49095 | Glycine dehydrogenase (Decarboxylating), mitochondrial [OS=Saccharomyces cerevisiae S288c]                 | 855227 | GCV2; YMR189W    | metabolic process                                                                                                             | cytosol;mitochondrion                  | catalytic activity                                                             | 2.884  | 0.389 | 0.13 |
| Q01163 | 37S ribosomal protein S23, mitochondrial [OS=Saccharomyces cerevisiae S288c]                               | 852748 | RSM23; YGL129C   | cell organization and biogenesis;metabolic process                                                                            | mitochondrion;ribosome                 | catalytic activity;nucleotide binding;RNA binding;structural molecule activity | 2.695  | 0.365 | 0.14 |
| Q03201 | 37S ribosomal protein S10, mitochondrial [OS=Saccharomyces cerevisiae S288c]                               | 851611 | RSM10; YDR041W   | cell organization and biogenesis;metabolic process                                                                            | mitochondrion;ribosome                 | structural molecule activity                                                   | 1.424  | 0.194 | 0.14 |
| P36151 | Uncharacterized protein YKR070W [OS=Saccharomyces cerevisiae S288c]                                        | 853944 | YKR070W; YKR070W | metabolic process                                                                                                             | mitochondrion                          |                                                                                | 1.976  | 0.274 | 0.14 |
| P38323 | ATP-dependent clpX-like chaperone, mitochondrial [OS=Saccharomyces cerevisiae S288c]                       | 852528 | MCX1; YBR227C    | metabolic process                                                                                                             | membrane;mitochondrion;organelle lumen | catalytic activity;nucleotide binding                                          | 0.501  | 0.07  | 0.14 |
| P36060 | NADH-cytochrome b5 reductase 2 [OS=Saccharomyces cerevisiae S288c]                                         | 853707 | MCR1; YKL150W    | metabolic process;response to stimulus                                                                                        | membrane;mitochondrion                 | catalytic activity;protein binding                                             | 19.691 | 2.793 | 0.14 |
| P18496 | Mitochondrial ATPase complex subunit ATP10 [OS=Saccharomyces cerevisiae S288c]                             | 851109 | ATP10; YLR393W   | cell organization and biogenesis                                                                                              | cytoplasm;membrane;mitochondrion       | protein binding                                                                | 1.818  | 0.259 | 0.14 |
| P15424 | ATP-dependent RNA helicase MSS116, mitochondrial [OS=Saccharomyces cerevisiae S288c]                       | 851775 | MSS116; YDR194C  | metabolic process;regulation of biological process                                                                            | mitochondrion;organelle lumen          | catalytic activity;nucleotide binding;RNA binding                              | 1.154  | 0.166 | 0.14 |
| P42847 | 37S ribosomal protein S18, mitochondrial [OS=Saccharomyces cerevisiae S288c]                               | 855410 | MRPS18; YNL306W  | cell organization and biogenesis;metabolic process                                                                            | mitochondrion;ribosome                 | RNA binding;structural molecule activity                                       | 1.054  | 0.155 | 0.15 |
| P40961 | prohibitin-1 [OS=Saccharomyces cerevisiae S288c]                                                           | 853033 | PHB1; YGR132C    | cell organization and biogenesis;metabolic process;regulation of biological                                                   | membrane;mitochondrion                 | protein binding                                                                | 9      | 1.336 | 0.15 |

|        |                                                                                                              |        |                 |                                                                                               |                                                 |                                                                                     |        |        |      |  |
|--------|--------------------------------------------------------------------------------------------------------------|--------|-----------------|-----------------------------------------------------------------------------------------------|-------------------------------------------------|-------------------------------------------------------------------------------------|--------|--------|------|--|
|        |                                                                                                              |        |                 | process                                                                                       |                                                 |                                                                                     |        |        |      |  |
| P36517 | 54S ribosomal protein L4, mitochondrial [OS=Saccharomyces cerevisiae S288c]                                  | 85160  | MRPL4; YLR439W  | cell organization and biogenesis;metabolic process                                            | mitochondrion;ribosome                          | structural molecule activity                                                        | 1.565  | 0.233  | 0.15 |  |
| P19414 | Aconitate hydratase, mitochondrial [OS=Saccharomyces cerevisiae S288c]                                       | 85103  | ACO1; YLR304C   | cell organization and biogenesis;metabolic process;transport                                  | cytoplasm;cytosol;mitochondrion;organelle lumen | catalytic activity;DNA binding;metal ion binding                                    | 66.002 | 10.053 | 0.15 |  |
| P46998 | mitochondrial membrane protein FMP33 [OS=Saccharomyces cerevisiae S288c]                                     | 85329  | FMP33; YJL161W  |                                                                                               | membrane;mitochondrion                          |                                                                                     | 2.162  | 0.334  | 0.15 |  |
| P28834 | Isocitrate dehydrogenase [NAD] subunit 1, mitochondrial [OS=Saccharomyces cerevisiae S288c]                  | 855691 | IDH1; YNL037C   | metabolic process;transport                                                                   | cytosol;mitochondrion;organelle lumen           | catalytic activity;metal ion binding;nucleotide binding;protein binding;RNA binding | 15.238 | 2.36   | 0.15 |  |
| P32799 | Cytochrome c oxidase subunit 6A, mitochondrial [OS=Saccharomyces cerevisiae S288c]                           | 852684 | COX13; YGL191W  | cell organization and biogenesis;metabolic process;regulation of biological process;transport | membrane;mitochondrion                          | catalytic activity;enzyme regulator activity;transporter activity                   | 18.953 | 2.981  | 0.16 |  |
| P38891 | Branched-chain-amino-acid aminotransferase, mitochondrial [OS=Saccharomyces cerevisiae S288c]                | 856615 | BAT1; YHR208W   | metabolic process;regulation of biological process;response to stimulus                       | mitochondrion;organelle lumen                   | catalytic activity                                                                  | 15.876 | 2.511  | 0.16 |  |
| P00447 | Superoxide dismutase [Mn], mitochondrial [OS=Saccharomyces cerevisiae S288c]                                 | 856399 | SOD2; YHR008C   | metabolic process;response to stimulus                                                        | mitochondrion;organelle lumen                   | antioxidant activity;catalytic activity;metal ion binding                           | 9      | 1.424  | 0.16 |  |
| P08067 | cytochrome b-c1 complex subunit Rieske, mitochondrial [OS=Saccharomyces cerevisiae S288c]                    | 856689 | RIP1; YEL024W   | metabolic process;transport                                                                   | membrane;mitochondrion                          | catalytic activity;metal ion binding;transporter activity                           | 55.234 | 9      | 0.16 |  |
| P04037 | cytochrome c oxidase subunit 4, mitochondrial [OS=Saccharomyces cerevisiae S288c]                            | 852688 | COX4; YGL187C   | cell organization and biogenesis;metabolic process;transport                                  | membrane;mitochondrion                          | catalytic activity;metal ion binding;transporter activity                           | 34.112 | 5.579  | 0.16 |  |
| P36516 | 54S ribosomal protein L3, mitochondrial [OS=Saccharomyces cerevisiae S288c]                                  | 855039 | MRPL3; YMR024W  | cell organization and biogenesis;metabolic process;response to stimulus                       | mitochondrion;nucleus;ribosome                  | catalytic activity;RNA binding;structural molecule activity                         | 1.043  | 0.172  | 0.16 |  |
| Q00711 | Succinate dehydrogenase [ubiquinone] flavoprotein subunit, mitochondrial [OS=Saccharomyces cerevisiae S288c] | 853709 | SDH1; YKL148C   | metabolic process;transport                                                                   | membrane;mitochondrion                          | catalytic activity;nucleotide binding;protein binding                               | 18.619 | 3.072  | 0.16 |  |
| P02992 | elongation factor Tu, mitochondrial [OS=Saccharomyces cerevisiae S288c]                                      | 854359 | TUF1; YOR187W   | cell organization and biogenesis;metabolic process                                            | mitochondrion                                   | catalytic activity;nucleotide binding;RNA binding                                   | 23.245 | 3.924  | 0.17 |  |
| P39006 | Phosphatidylserine decarboxylase proenzyme 1, mitochondrial [OS=Saccharomyces cerevisiae S288c]              | 855552 | PSD1; YNL169C   | metabolic process;regulation of biological process                                            | membrane;mitochondrion                          | catalytic activity                                                                  | 0.487  | 0.083  | 0.17 |  |
| P53312 | Succinyl-CoA ligase [ADP-forming] subunit beta, mitochondrial [OS=Saccharomyces cerevisiae S288c]            | 853159 | LSC2; YGR244C   | metabolic process                                                                             | mitochondrion                                   | catalytic activity;nucleotide binding                                               | 20.017 | 3.417  | 0.17 |  |
| P12686 | 37S ribosomal protein MRP13, mitochondrial [OS=Saccharomyces cerevisiae S288c]                               | 852975 | MRP13; YGR084C  | cell organization and biogenesis;metabolic process                                            | mitochondrion;ribosome                          | structural molecule activity                                                        | 1.512  | 0.259  | 0.17 |  |
| P36534 | 54S ribosomal protein L40, mitochondrial [OS=Saccharomyces cerevisiae S288c]                                 | 855930 | MRPL40; YPL173W | cell organization and biogenesis;metabolic process                                            | mitochondrion;ribosome                          | protein binding;structural molecule activity                                        | 1.512  | 0.259  | 0.17 |  |
| P32316 | acetyl-CoA hydrolase [OS=Saccharomyces cerevisiae S288c]                                                     | 852266 | ACH1; YBL015W   | metabolic process                                                                             | cytoplasm;cytosol;mitochondrion                 | catalytic activity                                                                  | 29.539 | 5.136  | 0.17 |  |
| P38885 | Altered inheritance of mitochondria protein 46, mitochondrial [OS=Saccharomyces cerevisiae S288c]            | 856606 | AIM46; YHR199C  | mitochondrion                                                                                 | catalytic activity                              | 1.404                                                                               | 0.245  | 0.17   |      |  |
| P00830 | ATP synthase subunit beta, mitochondrial [OS=Saccharomyces cerevisiae S288c]                                 | 853585 | ATP2; YJR121W   | metabolic process;transport                                                                   | cytosol;membrane;mitochondrion                  | catalytic activity;nucleotide binding;protein binding;transporter activity          | 99     | 17.478 | 0.18 |  |
| P53140 | Protein RMD9, mitochondrial [OS=Saccharomyces cerevisiae S288c]                                              | 852771 | RMD9; YGL107C   | cell differentiation;metabolic process;regulation of biological process                       | membrane;mitochondrion                          | RNA binding                                                                         | 1.268  | 0.227  | 0.18 |  |
| P32902 | 37S ribosomal protein MRP4, mitochondrial                                                                    | 856384 | MRP4; YHL004    | cell organization and biogenesis;metabolic process                                            | mitochondrion;ribosome                          | structural molecule activity                                                        | 1.154  | 0.212  | 0.18 |  |

|          |                                                                                                                |        |                  |                                                                                                        |                                                 |                                                              |        |       |      |
|----------|----------------------------------------------------------------------------------------------------------------|--------|------------------|--------------------------------------------------------------------------------------------------------|-------------------------------------------------|--------------------------------------------------------------|--------|-------|------|
|          | [OS=Saccharomyces cerevisiae S288c]                                                                            |        | W                |                                                                                                        |                                                 |                                                              |        |       |      |
| P08417   | fumarate hydratase, mitochondrial [OS=Saccharomyces cerevisiae S288c]                                          | 855866 | FUM1; YPL262W    | cell organization and biogenesis;metabolic process                                                     | cytoplasm;cytosol;mitochondrion;organelle lumen | catalytic activity                                           | 13.874 | 2.562 | 0.18 |
| P38523   | GrpE protein homolog, mitochondrial [OS=Saccharomyces cerevisiae S288c]                                        | 854407 | MGE1; YOR232W    | metabolic process;regulation of biological process;transport                                           | membrane;mitochondrion;organelle lumen          | enzyme regulator activity;nucleotide binding;protein binding | 2.36   | 0.438 | 0.19 |
| P32787   | Mitochondrial genome maintenance protein MGM101 [OS=Saccharomyces cerevisiae S288c]                            | 853609 | MGM101; YJR144W  | cell organization and biogenesis;metabolic process;response to stimulus                                | chromosome;mitochondrion                        | DNA binding                                                  | 4.456  | 0.833 | 0.19 |
| P43567   | alanine--glyoxylate aminotransferase 1 [OS=Saccharomyces cerevisiae S288c]                                     | 850514 | AGX1; YFL030W    | metabolic process                                                                                      | cytosol;mitochondrion                           | catalytic activity                                           | 2.481  | 0.468 | 0.19 |
| P10507   | mitochondrial-processing peptidase subunit beta [OS=Saccharomyces cerevisiae S288c]                            | 850860 | MAS1; YLR163C    | metabolic process;transport                                                                            | mitochondrion;organelle lumen                   | catalytic activity;metal ion binding;protein binding         | 2.481  | 0.468 | 0.19 |
| P47052   | succinate dehydrogenase [ubiquinone] flavoprotein subunit 2, mitochondrial [OS=Saccharomyces cerevisiae S288c] | 853405 | YJL045W; YJL045W | metabolic process;transport                                                                            | membrane;mitochondrion                          | catalytic activity;nucleotide binding                        | 5.884  | 1.11  | 0.19 |
| Q05931   | Heat shock protein SSO1, mitochondrial [OS=Saccharomyces cerevisiae S288c]                                     | 851084 | SSO1; YLR369W    | cell organization and biogenesis;metabolic process                                                     | mitochondrion;organelle lumen                   | nucleotide binding;protein binding                           | 0.995  | 0.189 | 0.19 |
| P06208-1 | 2-isopropylmalate synthase [OS=Saccharomyces cerevisiae S288c]                                                 | 855619 | LEU4; YNL104C    | metabolic process                                                                                      | cytoplasm;mitochondrion                         | catalytic activity;protein binding                           | 9      | 1.728 | 0.19 |
| P53881   | 54S ribosomal protein L22, mitochondrial [OS=Saccharomyces cerevisiae S288c]                                   | 855544 | MRPL22; YNL177C  | cell organization and biogenesis;metabolic process                                                     | mitochondrion;ribosome                          | RNA binding;structural molecule activity                     | 1.994  | 0.389 | 0.20 |
| P25719   | Peptidyl-prolyl cis-trans isomerase C, mitochondrial [OS=Saccharomyces cerevisiae S288c]                       | 854897 | CPR3; YML078W    | cell death;metabolic process                                                                           | mitochondrion;organelle lumen                   | catalytic activity                                           | 2.981  | 0.585 | 0.20 |
| P39525   | 3-oxoacyl-[acyl-carrier-protein] synthase homolog [OS=Saccharomyces cerevisiae S288c]                          | 856790 | CEM1; YER061C    | metabolic process                                                                                      | mitochondrion                                   | catalytic activity                                           | 1.848  | 0.369 | 0.20 |
| P25372   | Thioredoxin-3, mitochondrial [OS=Saccharomyces cerevisiae S288c]                                               | 850444 | TRX3; YCR083W    | cellular homeostasis;metabolic process;regulation of biological process;response to stimulus;transport | cytoplasm;mitochondrion                         | catalytic activity                                           | 2.511  | 0.52  | 0.21 |
| P38122   | 3-methyl-2-oxobutanoate hydroxymethyltransferase [OS=Saccharomyces cerevisiae S288c]                           | 852474 | ECM31; YBR176W   | metabolic process                                                                                      | mitochondrion                                   | catalytic activity                                           | 0.585  | 0.122 | 0.21 |
| P36520   | 54S ribosomal protein L10, mitochondrial [OS=Saccharomyces cerevisiae S288c]                                   | 855436 | MRPL10; YNL284C  | cell organization and biogenesis;metabolic process                                                     | mitochondrion;ribosome                          | structural molecule activity                                 | 0.551  | 0.116 | 0.21 |
| P36013   | NAD-dependent malic enzyme, mitochondrial [OS=Saccharomyces cerevisiae S288c]                                  | 853839 | MAE1; YKL029C    | metabolic process                                                                                      | mitochondrion;organelle lumen                   | catalytic activity;metal ion binding;nucleotide binding      | 2.35   | 0.496 | 0.21 |
| P36528   | 54S ribosomal protein L17, mitochondrial [OS=Saccharomyces cerevisiae S288c]                                   | 855469 | MRPL17; YNL252C  | cell organization and biogenesis;metabolic process                                                     | mitochondrion;ribosome                          | structural molecule activity                                 | 0.52   | 0.11  | 0.21 |
| Q07500   | External NADH-ubiquinone oxidoreductase 2, mitochondrial [OS=Saccharomyces cerevisiae S288c]                   | 851474 | NDE2; YDL085W    | metabolic process                                                                                      | mitochondrion                                   | catalytic activity;nucleotide binding                        | 12.594 | 2.687 | 0.21 |
| P40513   | Mitochondrial acidic protein MAM33 [OS=Saccharomyces cerevisiae S288c]                                         | 854740 | MAM33; YIL070C   | metabolic process;regulation of biological process                                                     | mitochondrion;organelle lumen                   | translation regulator activity                               | 3.642  | 0.778 | 0.21 |
| P32839   | Mitochondrial chaperone BCS1 [OS=Saccharomyces cerevisiae S288c]                                               | 851981 | BCS1; YDR375C    | cell organization and biogenesis;metabolic process;response to stimulus;transport                      | cytosol;membrane;mitochondrion                  | catalytic activity;nucleotide binding;transporter activity   | 0.425  | 0.093 | 0.22 |
| P43635   | Citrate synthase 3, mitochondrial [OS=Saccharomyces cerevisiae S288c]                                          | 856107 | CIT3; YPR001W    | metabolic process                                                                                      | mitochondrion                                   | catalytic activity                                           | 6.11   | 1.346 | 0.22 |
| P32891   | D-lactate dehydrogenase [cytochrome] 1, mitochondrial [OS=Saccharomyces cerevisiae S288c]                      | 851380 | DLD1; YDL174C    | metabolic process;transport                                                                            | membrane;mitochondrion                          | catalytic activity;nucleotide binding                        | 13.03  | 2.875 | 0.22 |
| P28817   | 3-hydroxyisobutyryl-CoA hydrolase, mitochondrial [OS=Saccharomyces cerevisiae S288c]                           | 851606 | EHD3; YDR036C    | metabolic process                                                                                      | mitochondrion                                   | catalytic activity                                           | 1.212  | 0.269 | 0.22 |

|        |                                                                                                                    |        |                         |                                                                                              |                                        |                                                                                        |       |      |      |        |       |      |
|--------|--------------------------------------------------------------------------------------------------------------------|--------|-------------------------|----------------------------------------------------------------------------------------------|----------------------------------------|----------------------------------------------------------------------------------------|-------|------|------|--------|-------|------|
| Q96VH5 | MICOS complex subunit Mic10 [OS=Saccharomyces cerevisiae S288c]                                                    | 850300 | MOS1; MIC10; YCL057 C-A | cell organization and biogenesis                                                             | membrane;mitochondrion                 |                                                                                        |       |      |      | 4.179  | 0.931 | 0.22 |
| Q03976 | 37S ribosomal protein S24, mitochondrial [OS=Saccharomyces cerevisiae S288c]                                       | 851755 | RSM24; YDR175 C         | cell organization and biogenesis;metabolic process                                           | mitochondrion;ribosome                 | structural molecule activity                                                           |       |      |      | 0.905  | 0.202 | 0.22 |
| P07246 | Alcohol dehydrogenase 3, mitochondrial [OS=Saccharomyces cerevisiae S288c]                                         | 855107 | ADH3; YMR08 3W          | metabolic process                                                                            | mitochondrion;organelle lumen          | catalytic activity;metal ion binding                                                   |       |      |      | 10.159 | 2.34  | 0.23 |
| P37298 | Succinate dehydrogenase [ubiquinone] cytochrome b small subunit, mitochondrial [OS=Saccharomyces cerevisiae S288c] | 851758 | SDH4; YDR178 W          | metabolic process;transport                                                                  | membrane;mitochondrion                 | catalytic activity;metal ion binding                                                   |       |      |      | 4.995  | 1.154 | 0.23 |
| P16387 | Pyruvate dehydrogenase E1 component subunit alpha, mitochondrial [OS=Saccharomyces cerevisiae S288c]               | 856925 | PDA1; YER178 W          | cell growth;metabolic process                                                                | mitochondrion;organelle lumen          | catalytic activity                                                                     |       |      |      | 25.264 | 5.898 | 0.23 |
| P34227 | Mitochondrial peroxiredoxin PRX1 [OS=Saccharomyces cerevisiae S288c]                                               | 852215 | PRX1; YBL064 C          | cellular homeostasis;metabolic process;regulation of biological process;response to stimulus | mitochondrion                          | antioxidant activity;catalytic activity                                                |       |      |      | 6.848  | 1.637 | 0.24 |
| P52893 | probable alanine aminotransferase, mitochondrial [OS=Saccharomyces cerevisiae S288c]                               | 850778 | ALT1; YLR089 C          | metabolic process                                                                            | mitochondrion;organelle lumen          | catalytic activity                                                                     |       |      |      | 1.438  | 0.346 | 0.24 |
| P16451 | Pyruvate dehydrogenase complex protein X component, mitochondrial [OS=Saccharomyces cerevisiae S288c]              | 853107 | PDX1; YGR193 C          | metabolic process                                                                            | mitochondrion;organelle lumen          | catalytic activity;structural molecule activity                                        |       |      |      | 4.055  | 0.978 | 0.24 |
| P37292 | Serine hydroxymethyltransferase, mitochondrial [OS=Saccharomyces cerevisiae S288c]                                 | 852565 | SHM1; YBR263 W          | metabolic process                                                                            | mitochondrion                          | catalytic activity                                                                     |       |      |      | 12.219 | 3.037 | 0.25 |
| P32340 | Rotenone-insensitive NADH-ubiquinone oxidoreductase, mitochondrial [OS=Saccharomyces cerevisiae S288c]             | 854919 | NDI1; YML12 0C          | metabolic process;regulation of biological process                                           | membrane;mitochondrion;organelle lumen | catalytic activity;nucleotide binding                                                  |       |      |      | 22.95  | 5.723 | 0.25 |
| P32860 | NifU-like protein, mitochondrial [OS=Saccharomyces cerevisiae S288c]                                               | 853826 | NFU1; YKL040 C          | cell organization and biogenesis;cellular homeostasis;metabolic process                      | mitochondrion;organelle lumen          | metal ion binding                                                                      |       |      |      | 5.494  | 1.371 | 0.25 |
| P00427 | Cytochrome c oxidase subunit 6, mitochondrial [OS=Saccharomyces cerevisiae S288c]                                  | 856448 | COX6; YHR051 W          | metabolic process;transport                                                                  | membrane;mitochondrion                 | catalytic activity;metal ion binding;transporter activity                              |       |      |      | 4.623  | 1.154 | 0.25 |
| Q02950 | 37S ribosomal protein MRP51, mitochondrial [OS=Saccharomyces cerevisiae S288c]                                     | 855985 | MRP51; YPL118 W         | cell organization and biogenesis;metabolic process                                           | mitochondrion;ribosome                 | structural molecule activity                                                           |       |      |      | 1.154  | 0.292 | 0.25 |
| P53732 | 37S ribosomal protein S12, mitochondrial [OS=Saccharomyces cerevisiae S288c]                                       | 855772 | MRP51 2; YNR036 C       | cell organization and biogenesis;metabolic process                                           | mitochondrion;ribosome                 | structural molecule activity                                                           |       |      |      | 1.154  | 0.292 | 0.25 |
| P19516 | Cytochrome c oxidase assembly protein COX11, mitochondrial [OS=Saccharomyces cerevisiae S288c]                     | 855971 | COX11; YPL132 W         | cell organization and biogenesis;metabolic process                                           | membrane;mitochondrion;ribosome        | metal ion binding                                                                      |       |      |      | 1.069  | 0.274 | 0.26 |
| P36521 | 54S ribosomal protein L11, mitochondrial [OS=Saccharomyces cerevisiae S288c]                                       | 851325 | MRPL1 1; YDL202 W       | cell organization and biogenesis;metabolic process                                           | mitochondrion;ribosome                 | structural molecule activity                                                           |       |      |      | 1.069  | 0.274 | 0.26 |
| P40502 | Altered inheritance of mitochondria protein 19, mitochondrial [OS=Saccharomyces cerevisiae S288c]                  | 854722 | AIM19; YIL087C          |                                                                                              | membrane;mitochondrion                 |                                                                                        |       |      |      | 0.995  | 0.259 | 0.26 |
| P38300 | Inner membrane mitoribosome receptor MBA1, mitochondrial [OS=Saccharomyces cerevisiae S288c]                       | 852483 | MBA1; YBR185 C          | cell organization and biogenesis;regulation of biological process                            | membrane;mitochondrion                 |                                                                                        |       |      |      | 0.995  | 0.259 | 0.26 |
| Q08968 | UPF0061 protein FMP40 [OS=Saccharomyces cerevisiae S288c]                                                          | 855879 | FMP40; YPL222 W         | mitochondrion                                                                                | protein binding                        |                                                                                        | 2.495 | 0.65 | 0.26 |        |       |      |
| P10662 | 37S ribosomal protein MRP1, mitochondrial [OS=Saccharomyces cerevisiae S288c]                                      | 851948 | MRP1; YDR347 W          | cell organization and biogenesis;metabolic process;response to stimulus                      | mitochondrion;ribosome                 | antioxidant activity;catalytic activity;metal ion binding;structural molecule activity |       |      |      | 2.981  | 0.778 | 0.26 |
| P23833 | Protein SCO1, mitochondrial [OS=Saccharomyces cerevisiae S288c]                                                    | 852325 | SCO1; YBR037 C          | cell organization and biogenesis;cellular homeostasis;response to                            | membrane;mitochondrion                 | antioxidant activity;catalytic activity;metal ion                                      |       |      |      | 1.783  | 0.468 | 0.26 |



|        |                                                                                                          |        |                 |                                                                                                                                       |                                                 |                                                                           |        |        |      |
|--------|----------------------------------------------------------------------------------------------------------|--------|-----------------|---------------------------------------------------------------------------------------------------------------------------------------|-------------------------------------------------|---------------------------------------------------------------------------|--------|--------|------|
|        |                                                                                                          |        |                 | stimulus;transport                                                                                                                    |                                                 | binding                                                                   |        |        |      |
| P51998 | 54S ribosomal protein yml6, mitochondrial [OS=Saccharomyces cerevisiae S288c]                            | 854983 | YML6; YML025C   | cell organization and biogenesis;metabolic process                                                                                    | mitochondrion;ribosome                          | RNA binding;structural molecule activity                                  | 0.931  | 0.245  | 0.26 |
| Q12029 | Probable mitochondrial transport protein fsf1 [OS=Saccharomyces cerevisiae S288c]                        | 854445 | FSF1; YOR271C   | transport                                                                                                                             | membrane;mitochondrion                          | transporter activity                                                      | 2.36   | 0.624  | 0.26 |
| P38797 | Protein phosphatase 2C homolog 7, mitochondrial [OS=Saccharomyces cerevisiae S288c]                      | 856475 | PTC7; YHR076W   | metabolic process                                                                                                                     | mitochondrion                                   | catalytic activity;metal ion binding;protein binding                      | 0.874  | 0.233  | 0.27 |
| P32191 | Glycerol-3-phosphate dehydrogenase, mitochondrial [OS=Saccharomyces cerevisiae S288c]                    | 854651 | GUT2; YIL155C   | metabolic process                                                                                                                     | membrane;mitochondrion                          | catalytic activity                                                        | 9.502  | 2.574  | 0.27 |
| P32453 | Protein ATP11, mitochondrial [OS=Saccharomyces cerevisiae S288c]                                         | 855401 | ATP11; YNL315C  | cell organization and biogenesis                                                                                                      | mitochondrion                                   | protein binding                                                           | 1.512  | 0.413  | 0.27 |
| P46367 | Potassium-activated aldehyde dehydrogenase, mitochondrial [OS=Saccharomyces cerevisiae S288c]            | 854556 | ALD4; YOR374W   | metabolic process                                                                                                                     | mitochondrion;organelle lumen                   | catalytic activity                                                        | 58.078 | 15.927 | 0.27 |
| P35180 | mitochondrial import receptor subunit Tom20 [OS=Saccharomyces cerevisiae S288c]                          | 852973 | TOM20 ; YGR082W | cell organization and biogenesis;transport                                                                                            | membrane;mitochondrion                          | protein binding;transporter activity                                      | 0.701  | 0.194  | 0.28 |
| P40053 | Altered inheritance of mitochondria protein 9, mitochondrial [OS=Saccharomyces cerevisiae S288c]         | 856813 | AIM9; YER080W   |                                                                                                                                       | mitochondrion                                   |                                                                           | 4.289  | 1.19   | 0.28 |
| P33303 | Succinate/fumarate mitochondrial transporter [OS=Saccharomyces cerevisiae S288c]                         | 853558 | SFC1; YJR095W   | metabolic process;transport                                                                                                           | membrane;mitochondrion                          | structural molecule activity;transporter activity                         | 17.957 | 4.995  | 0.28 |
| Q04728 | Arginine biosynthesis bifunctional protein ArgJ, mitochondrial [OS=Saccharomyces cerevisiae S288c]       | 855084 | ARG7; YMR062C   | metabolic process                                                                                                                     | mitochondrion;organelle lumen                   | catalytic activity                                                        | 1.154  | 0.322  | 0.28 |
| P00445 | Superoxide dismutase [Cu-Zn] [OS=Saccharomyces cerevisiae S288c]                                         | 853568 | SOD1; YJR104C   | cell organization and biogenesis;cellular homeostasis;metabolic process;regulation of biological process;response to stimulus         | cytoplasm;cytosol;mitochondrion;nucleus         | antioxidant activity;catalytic activity;metal ion binding;protein binding | 1.848  | 0.52   | 0.28 |
| P07275 | Delta-1-pyrroline-5-carboxylate dehydrogenase, mitochondrial [OS=Saccharomyces cerevisiae S288c]         | 856432 | PUT2; YHR037W   | metabolic process                                                                                                                     | membrane;mitochondrion;organelle lumen          | catalytic activity                                                        | 6.565  | 1.848  | 0.28 |
| P42940 | Probable electron transfer flavoprotein subunit beta [OS=Saccharomyces cerevisiae S288c]                 | 853121 | CIR1; YGR207C   | metabolic process;transport                                                                                                           | mitochondrion;organelle lumen                   |                                                                           | 7.66   | 2.162  | 0.28 |
| P32939 | GTP-binding protein ypt7 [OS=Saccharomyces cerevisiae S288c]                                             | 855012 | YPT7; YML001W   | cell communication;cell organization and biogenesis;metabolic process;regulation of biological process;response to stimulus;transport | cytosol;endosome;membrane;mitochondrion;vacuole | catalytic activity;nucleotide binding;protein binding                     | 0.585  | 0.166  | 0.28 |
| Q06630 | Mitochondrial homologous recombination protein 1 [OS=Saccharomyces cerevisiae S288c]                     | 851890 | MHR1; YDR296W   | cell organization and biogenesis;metabolic process;regulation of biological process;response to stimulus                              | mitochondrion;nucleus                           | catalytic activity;DNA binding;structural molecule activity               | 0.585  | 0.166  | 0.28 |
| Q12480 | Probable electron transfer flavoprotein subunit alpha, mitochondrial [OS=Saccharomyces cerevisiae S288c] | 856112 | AIM45; YPR004C  | metabolic process;transport                                                                                                           | mitochondrion;organelle lumen                   | catalytic activity;nucleotide binding                                     | 3.467  | 0.995  | 0.29 |
| P41735 | 5-demethoxyubiquinone hydroxylase, mitochondrial [OS=Saccharomyces cerevisiae S288c]                     | 854292 | CAT5; YOR125C   | metabolic process                                                                                                                     | membrane;mitochondrion                          | catalytic activity;metal ion binding                                      | 0.54   | 0.155  | 0.29 |
| P07806 | Valine--tRNA ligase, mitochondrial [OS=Saccharomyces cerevisiae S288c]                                   | 852986 | VAS1; YGR094W   | metabolic process;regulation of biological process                                                                                    | cytoplasm;cytosol;mitochondrion                 | catalytic activity;nucleotide binding                                     | 0.722  | 0.212  | 0.29 |
| P36775 | Lon protease homolog, mitochondrial [OS=Saccharomyces cerevisiae S288c]                                  | 852259 | PIM1; YBL022C   | cell organization and biogenesis;metabolic process;regulation of biological process;response to stimulus                              | cytoplasm;mitochondrion;organelle lumen         | catalytic activity;DNA binding;nucleotide binding;RNA binding             | 1.222  | 0.359  | 0.29 |
| P07256 | Cytochrome b-c1 complex subunit 1, mitochondrial [OS=Saccharomyces cerevisiae S288c]                     | 852235 | COR1; YBL045C   | metabolic process;transport                                                                                                           | membrane;mitochondrion                          | catalytic activity;metal ion binding;protein binding;transporter activity | 18.783 | 5.529  | 0.29 |
| P38910 | 10 kDa heat shock protein, mitochondrial [OS=Saccharomyces cerevisiae S288c]                             | 854185 | HSP10; YOR020C  | cell organization and biogenesis;metabolic process;response to stimulus;transport                                                     | cytoplasm;mitochondrion;organelle lumen         | metal ion binding;nucleotide binding;protein binding                      | 4.623  | 1.371  | 0.30 |

|        |                                                                                                                                                          |        |                         |                                                                                                          |                                         |                                                                                |         |        |      |
|--------|----------------------------------------------------------------------------------------------------------------------------------------------------------|--------|-------------------------|----------------------------------------------------------------------------------------------------------|-----------------------------------------|--------------------------------------------------------------------------------|---------|--------|------|
|        | S288c]                                                                                                                                                   |        |                         |                                                                                                          |                                         | binding                                                                        |         |        |      |
| Q12166 | 2-isopropylmalate synthase 2, mitochondrial [OS=Saccharomyces cerevisiae S288c]                                                                          | 854275 | LEU9; YOR108W           | metabolic process                                                                                        | mitochondrion                           | catalytic activity;protein binding                                             | 3.739   | 1.11   | 0.30 |
| P16547 | Mitochondrial outer membrane protein OM45 [OS=Saccharomyces cerevisiae S288c]                                                                            | 854670 | OM45; YIL136W           |                                                                                                          | membrane;mitochondrion                  |                                                                                | 274.423 | 82.176 | 0.30 |
| P19262 | Dihydropyridoxyl-lysine-residue succinyltransferase component of 2-oxoglutarate dehydrogenase complex, mitochondrial [OS=Saccharomyces cerevisiae S288c] | 851726 | KGD2; YDR148C           | cell organization and biogenesis;metabolic process                                                       | mitochondrion                           | catalytic activity;protein binding                                             | 5.7     | 1.721  | 0.30 |
| P36525 | 54S ribosomal protein L24, mitochondrial [OS=Saccharomyces cerevisiae S288c]                                                                             | 855231 | MRPL24; YMR193W         | cell organization and biogenesis;metabolic process                                                       | mitochondrion;ribosome                  | RNA binding;structural molecule activity                                       | 1.929   | 0.585  | 0.30 |
| P22354 | 54S ribosomal protein L20, mitochondrial [OS=Saccharomyces cerevisiae S288c]                                                                             | 853960 | MRPL20; YKR085C         | cell organization and biogenesis;metabolic process                                                       | mitochondrion;ribosome                  | structural molecule activity                                                   | 1.276   | 0.389  | 0.30 |
| Q12428 | Probable 2-methylcitrate dehydratase [OS=Saccharomyces cerevisiae S288c]                                                                                 | 856108 | PDH1; YPR002W           | metabolic process                                                                                        | cytoplasm;membrane;mitochondrion        | catalytic activity                                                             | 19.535  | 5.978  | 0.31 |
| P40047 | Aldehyde dehydrogenase 5, mitochondrial [OS=Saccharomyces cerevisiae S288c]                                                                              | 856804 | ALD5; YER073W           | metabolic process                                                                                        | mitochondrion;organelle lumen           | catalytic activity                                                             | 3.146   | 0.968  | 0.31 |
| P38169 | Kynurenine 3-monoxygenase [OS=Saccharomyces cerevisiae S288c]                                                                                            | 852179 | BNA4; YBL098W           | metabolic process                                                                                        | membrane;mitochondrion                  | catalytic activity;nucleotide binding                                          | 0.269   | 0.083  | 0.31 |
| P48015 | Aminomethyltransferase, mitochondrial [OS=Saccharomyces cerevisiae S288c]                                                                                | 851582 | GCV1; YDR019C           | metabolic process                                                                                        | mitochondrion                           | catalytic activity;protein binding                                             | 11.217  | 3.489  | 0.31 |
| P41921 | glutathione reductase [OS=Saccharomyces cerevisiae S288c]                                                                                                | 856014 | GLR1; YPL091W           | cellular homeostasis;metabolic process;regulation of biological process;response to stimulus             | cytoplasm;cytosol;mitochondrion;nucleus | antioxidant activity;catalytic activity;nucleotide binding                     | 0.241   | 0.075  | 0.31 |
| Q06567 | ABC1 family protein MCP2 [OS=Saccharomyces cerevisiae S288c]                                                                                             | 850955 | YLR253W; MCP2; YLR253W  | cell organization and biogenesis                                                                         | membrane;mitochondrion                  |                                                                                | 0.218   | 0.068  | 0.31 |
| P35191 | DnaJ homolog 1, mitochondrial [OS=Saccharomyces cerevisiae S288c]                                                                                        | 850530 | MDJ1; YFL016C           | cell organization and biogenesis;metabolic process;regulation of biological process;response to stimulus | mitochondrion;organelle lumen           | enzyme regulator activity;metal ion binding;nucleotide binding;protein binding | 4.722   | 1.477  | 0.31 |
| P25374 | Cysteine desulfurase, mitochondrial [OS=Saccharomyces cerevisiae S288c]                                                                                  | 850343 | NFS1; YCL017C           | cell organization and biogenesis;cellular homeostasis;metabolic process                                  | mitochondrion;nucleus                   | catalytic activity;metal ion binding;protein binding                           | 2.594   | 0.817  | 0.31 |
| P09624 | Dihydropyridoxyl dehydrogenase, mitochondrial [OS=Saccharomyces cerevisiae S288c]                                                                        | 850527 | LPD1; YFL018C           | cellular homeostasis;metabolic process;regulation of biological process                                  | mitochondrion;organelle lumen           | catalytic activity;nucleotide binding                                          | 30.623  | 9.701  | 0.32 |
| P38172 | MIOREX complex component 3 [OS=Saccharomyces cerevisiae S288c]                                                                                           | 852181 | YBL095W; MRX3; YBL095W  |                                                                                                          | membrane;mitochondrion                  |                                                                                | 0.968   | 0.311  | 0.32 |
| P17558 | 37S ribosomal protein PET123, mitochondrial [OS=Saccharomyces cerevisiae S288c]                                                                          | 854329 | PET123; YOR158W         | cell organization and biogenesis;metabolic process                                                       | mitochondrion;ribosome                  | structural molecule activity                                                   | 1.448   | 0.468  | 0.32 |
| P27929 | 37S ribosomal protein NAM9, mitochondrial [OS=Saccharomyces cerevisiae S288c]                                                                            | 855585 | NAM9; YNL137C           | cell organization and biogenesis;metabolic process;regulation of biological process                      | mitochondrion;ribosome                  | RNA binding;structural molecule activity                                       | 0.931   | 0.301  | 0.32 |
| P17505 | Malate dehydrogenase, mitochondrial [OS=Saccharomyces cerevisiae S288c]                                                                                  | 853777 | MDH1; YKL085W           | metabolic process                                                                                        | mitochondrion;organelle lumen           | catalytic activity;protein binding;RNA binding                                 | 99      | 32.405 | 0.33 |
| Q05892 | MIOREX complex component 2 [OS=Saccharomyces cerevisiae S288c]                                                                                           | 850997 | YLR290C; COQ11; YLR290C | metabolic process                                                                                        | mitochondrion                           | catalytic activity                                                             | 3.217   | 1.054  | 0.33 |
| P21771 | 37S ribosomal protein S28, mitochondrial [OS=Saccharomyces cerevisiae S288c]                                                                             | 851937 | MRPS28; YDR337W         | cell organization and biogenesis;metabolic process                                                       | mitochondrion;ribosome                  | RNA binding;structural molecule activity                                       | 0.833   | 0.274  | 0.33 |
| P30902 | ATP synthase subunit d, mitochondrial [OS=Saccharomyces cerevisiae                                                                                       | 853853 | ATP7; YKL016C           | metabolic process;transport                                                                              | membrane;mitochondrion                  | catalytic activity;transporter activity                                        | 5.105   | 1.683  | 0.33 |

|        |                                                                                                             |         |                      |                                                                                               |                                                |       |       |      |  |  |                                                                                     |        |        |      |
|--------|-------------------------------------------------------------------------------------------------------------|---------|----------------------|-----------------------------------------------------------------------------------------------|------------------------------------------------|-------|-------|------|--|--|-------------------------------------------------------------------------------------|--------|--------|------|
|        | S288c]                                                                                                      |         |                      |                                                                                               |                                                |       |       |      |  |  |                                                                                     |        |        |      |
| P43617 | Uncharacterized mitochondrial carrier YFR045W [OS=Saccharomyces cerevisiae S288c]                           | 85066   | YFR045W; YFR045W     | metabolic process;transport                                                                   | membrane;mitochondrion                         |       |       |      |  |  | structural molecule activity;transporter activity                                   | 0.778  | 0.259  | 0.33 |
| P53736 | Uncharacterized protein YNR040W [OS=Saccharomyces cerevisiae S288c]                                         | 855776  | YNR040W; YNR040W     | mitochondrion                                                                                 |                                                | 1.154 | 0.389 | 0.34 |  |  |                                                                                     |        |        |      |
| P53326 | Uncharacterized protein YGR266W [OS=Saccharomyces cerevisiae S288c]                                         | 853182  | YGR266W; YGR266W     | membrane;mitochondrion                                                                        |                                                | 1.081 | 0.369 | 0.34 |  |  |                                                                                     |        |        |      |
| P0CS90 | Heat shock protein SSC1, mitochondrial [OS=Saccharomyces cerevisiae S288c]                                  | 853503  | SSC1; YJR045C        | cell organization and biogenesis;metabolic process;regulation of biological process;transport | membrane;mitochondrion;nucleus;organelle lumen |       |       |      |  |  | catalytic activity;enzyme regulator activity;nucleotide binding;protein binding     | 51.75  | 17.957 | 0.35 |
| P36046 | Mitochondrial intermembrane space import and assembly protein 40 [OS=Saccharomyces cerevisiae S288c]        | 853639  | MIA40; YKL195W       | cellular component movement;metabolic process;response to stimulus;transport                  | membrane;mitochondrion                         |       |       |      |  |  | catalytic activity;protein binding;transporter activity                             | 2.3    | 0.817  | 0.36 |
| Q06485 | Autophagy-related protein 33 [OS=Saccharomyces cerevisiae S288c]                                            | 851070  | ATG33; YLR356W       | cell communication;metabolic process;response to stimulus                                     | membrane;mitochondrion                         |       |       |      |  |  |                                                                                     | 2.162  | 0.778  | 0.36 |
| P21306 | ATP synthase subunit epsilon, mitochondrial [OS=Saccharomyces cerevisiae S288c]                             | 855857  | ATP15; YPL271W       | metabolic process;transport                                                                   | membrane;mitochondrion                         |       |       |      |  |  | catalytic activity;transporter activity                                             | 2.162  | 0.778  | 0.36 |
| P21801 | Succinate dehydrogenase [ubiquinone] iron-sulfur subunit, mitochondrial [OS=Saccharomyces cerevisiae S288c] | 850685  | SDH2; YLL041C        | metabolic process;transport                                                                   | membrane;mitochondrion                         |       |       |      |  |  | catalytic activity;metal ion binding                                                | 32.839 | 12.111 | 0.37 |
| Q3E824 | Uncharacterized protein YOR020W-A [OS=Saccharomyces cerevisiae S288c]                                       | 1466480 | YOR020W-A; YOR020W-A | metabolic process;transport                                                                   | membrane;mitochondrion                         |       |       |      |  |  |                                                                                     | 5.813  | 2.162  | 0.37 |
| P32473 | Pyruvate dehydrogenase E1 component subunit beta, mitochondrial [OS=Saccharomyces cerevisiae S288c]         | 852522  | PDB1; YBR221C        | metabolic process                                                                             | mitochondrion;organelle lumen                  |       |       |      |  |  | catalytic activity                                                                  | 10.288 | 3.833  | 0.37 |
| P46681 | D-lactate dehydrogenase [cytochrome] 2, mitochondrial [OS=Saccharomyces cerevisiae S288c]                   | 851376  | DLD2; YDL178W        | metabolic process                                                                             | mitochondrion;organelle lumen                  |       |       |      |  |  | catalytic activity;nucleotide binding;protein binding                               | 1.829  | 0.682  | 0.37 |
| P53266 | Cytochrome oxidase assembly protein SHY1 [OS=Saccharomyces cerevisiae S288c]                                | 853009  | SHY1; YGR112W        | cell organization and biogenesis                                                              | membrane;mitochondrion                         |       |       |      |  |  | protein binding                                                                     | 1.783  | 0.668  | 0.37 |
| P00044 | Cytochrome c iso-1 [OS=Saccharomyces cerevisiae S288c]                                                      | 853507  | CYC1; YJR048W        | metabolic process;transport                                                                   | mitochondrion                                  |       |       |      |  |  | metal ion binding;protein binding                                                   | 12.335 | 4.623  | 0.37 |
| Q12374 | Nuclear control of ATPase protein 2 [OS=Saccharomyces cerevisiae S288c]                                     | 856278  | NCA2; YPR155C        | metabolic process                                                                             | membrane;mitochondrion                         |       |       |      |  |  |                                                                                     | 0.565  | 0.212  | 0.38 |
| P20967 | 2-oxoglutarate dehydrogenase, mitochondrial [OS=Saccharomyces cerevisiae S288c]                             | 854681  | KGD1; YIL125W        | metabolic process                                                                             | cytosol;mitochondrion;organelle lumen          |       |       |      |  |  | catalytic activity                                                                  | 13.785 | 5.201  | 0.38 |
| P28241 | Isocitrate dehydrogenase [NAD] subunit 2, mitochondrial [OS=Saccharomyces cerevisiae S288c]                 | 854303  | IDH2; YOR136W        | metabolic process                                                                             | mitochondrion;organelle lumen                  |       |       |      |  |  | catalytic activity;metal ion binding;nucleotide binding;protein binding;RNA binding | 6.197  | 2.34   | 0.38 |
| P09440 | C-1-tetrahydrofolate synthase, mitochondrial [OS=Saccharomyces cerevisiae S288c]                            | 852378  | MIS1; YBR084W        | metabolic process                                                                             | cytosol;mitochondrion                          |       |       |      |  |  | catalytic activity;nucleotide binding                                               | 1.668  | 0.633  | 0.38 |
| P40495 | Homoisocitrate dehydrogenase, mitochondrial [OS=Saccharomyces cerevisiae S288c]                             | 854714  | LYS12; YIL094C       | metabolic process                                                                             | mitochondrion                                  |       |       |      |  |  | catalytic activity;metal ion binding;nucleotide binding                             | 6.499  | 2.481  | 0.38 |
| P07143 | Cytochrome c1, heme protein, mitochondrial [OS=Saccharomyces cerevisiae S288c]                              | 854231  | CYT1; YOR065W        | metabolic process;transport                                                                   | cytosol;membrane;mitochondrion                 |       |       |      |  |  | metal ion binding                                                                   | 19.309 | 7.377  | 0.38 |
| P23641 | mitochondrial phosphate carrier protein [OS=Saccharomyces cerevisiae S288c]                                 | 853540  | MIR1; YJR077C        | metabolic process;transport                                                                   | membrane;mitochondrion                         |       |       |      |  |  | protein binding;structural molecule activity;transporter activity                   | 26.826 | 10.365 | 0.39 |
| P16622 | Ferrochelatase, mitochondrial [OS=Saccharomyces cerevisiae S288c]                                           | 854347  | HEM15; YOR176W       | metabolic process                                                                             | membrane;mitochondrion                         |       |       |      |  |  | catalytic activity                                                                  | 5.579  | 2.162  | 0.39 |

|        |                                                                                                           |       |                       |                                                                                                        |                                         |                                                                         |        |        |      |
|--------|-----------------------------------------------------------------------------------------------------------|-------|-----------------------|--------------------------------------------------------------------------------------------------------|-----------------------------------------|-------------------------------------------------------------------------|--------|--------|------|
| P07251 | ATP synthase subunit alpha, mitochondrial [OS=Saccharomyces cerevisiae S288c]                             | 85217 | ATP1; YBL099W         | metabolic process;transport                                                                            | cytosol;membrane;mitochondrion          | catalytic activity;nucleotide binding;transporter activity              | 34.938 | 13.678 | 0.39 |
| P50088 | Stationary phase gene 1 protein [OS=Saccharomyces cerevisiae S288c]                                       | 85315 | SPG1; YGR236C         | endoplasmic reticulum;membrane;mitochondrion                                                           | 250.189                                 | 99                                                                      | 0.40   |        |      |
| P17695 | Glutaredoxin-2, mitochondrial [OS=Saccharomyces cerevisiae S288c]                                         | 85214 | GRX2; YDR513W         | cellular homeostasis;metabolic process;regulation of biological process;response to stimulus;transport | cytoplasm;cytosol;mitochondrion;nucleus | antioxidant activity;catalytic activity                                 | 1.31   | 0.52   | 0.40 |
| P53889 | uncharacterized mitochondrial hydrolase FMP41 [OS=Saccharomyces cerevisiae S288c]                         | 85553 | FMP41; YNL168C        | metabolic process                                                                                      | mitochondrion                           | catalytic activity;metal ion binding                                    | 1.254  | 0.501  | 0.40 |
| P50945 | MICOS complex subunit MIC27 [OS=Saccharomyces cerevisiae S288c]                                           | 85562 | AIM37; MIC27; YNL100W | cell organization and biogenesis                                                                       | membrane;mitochondrion                  |                                                                         | 1.254  | 0.501  | 0.40 |
| P32317 | Protein AFG1 [OS=Saccharomyces cerevisiae S288c]                                                          | 85665 | AFG1; YEL052W         | cell organization and biogenesis;metabolic process;response to stimulus;transport                      | membrane;mitochondrion                  | catalytic activity;nucleotide binding                                   | 1.154  | 0.468  | 0.41 |
| P23644 | Mitochondrial import receptor subunit TOM40 [OS=Saccharomyces cerevisiae S288c]                           | 85524 | TOM40; YMR203W        | transport                                                                                              | cytosol;membrane;mitochondrion          | protein binding;transporter activity                                    | 1.154  | 0.468  | 0.41 |
| P32331 | Carrier protein YMC1, mitochondrial [OS=Saccharomyces cerevisiae S288c]                                   | 85617 | YMC1; YPR058W         | metabolic process;transport                                                                            | membrane;mitochondrion;vacuole          | structural molecule activity;transporter activity                       | 2.384  | 0.968  | 0.41 |
| P32795 | Mitochondrial inner membrane i-AAA protease supercomplex subunit YME1 [OS=Saccharomyces cerevisiae S288c] | 85613 | YME1; YPR024W         | metabolic process;response to stimulus;transport                                                       | membrane;mitochondrion                  | catalytic activity;metal ion binding;nucleotide binding;protein binding | 1.938  | 0.8    | 0.41 |
| P33759 | 37S ribosomal protein S5, mitochondrial [OS=Saccharomyces cerevisiae S288c]                               | 85253 | MRP55; YBR251W        | cell organization and biogenesis;metabolic process                                                     | mitochondrion;ribosome                  | RNA binding;structural molecule activity                                | 0.995  | 0.413  | 0.42 |
| P37293 | N-terminal acetyltransferase 2 [OS=Saccharomyces cerevisiae S288c]                                        | 85305 | NAT2; YGR147C         | metabolic process                                                                                      | cytoplasm;mitochondrion                 | catalytic activity                                                      | 0.931  | 0.389  | 0.42 |
| Q03246 | 37S ribosomal protein S17, mitochondrial [OS=Saccharomyces cerevisiae S288c]                              | 85522 | MRP517; YMR188C       | cell differentiation;cell organization and biogenesis;metabolic process                                | mitochondrion;ribosome                  | RNA binding;structural molecule activity                                | 0.931  | 0.389  | 0.42 |
| Q07914 | mitochondrial import inner membrane translocase subunit TIM14 [OS=Saccharomyces cerevisiae S288c]         | 85069 | PAM18; YLR008C        | regulation of biological process;transport                                                             | membrane;mitochondrion                  | enzyme regulator activity;protein binding;transporter activity          | 0.778  | 0.334  | 0.43 |
| P39515 | mitochondrial import inner membrane translocase subunit Tim17 [OS=Saccharomyces cerevisiae S288c]         | 85329 | TIM17; YJL143W        | cell organization and biogenesis;transport                                                             | membrane;mitochondrion                  | protein binding;transporter activity                                    | 0.778  | 0.334  | 0.43 |
| P49367 | Homoaconitase, mitochondrial [OS=Saccharomyces cerevisiae S288c]                                          | 85182 | LYS4; YDR234W         | metabolic process                                                                                      | mitochondrion                           | catalytic activity;metal ion binding;protein binding                    | 1.276  | 0.551  | 0.43 |
| P40341 | Mitochondrial respiratory chain complexes assembly protein YTA12 [OS=Saccharomyces cerevisiae S288c]      | 85511 | YTA12; YMR089C        | cell organization and biogenesis;metabolic process;response to stimulus;transport                      | cytoplasm;membrane;mitochondrion        | catalytic activity;metal ion binding;nucleotide binding;protein binding | 1.795  | 0.778  | 0.43 |
| Q04013 | Citrate/oxoglutarate carrier protein [OS=Saccharomyces cerevisiae S288c]                                  | 85528 | YHM2; YMR241W         | cell organization and biogenesis;metabolic process;transport                                           | membrane;mitochondrion                  | DNA binding;structural molecule activity;transporter activity           | 3.467  | 1.512  | 0.44 |
| P36112 | MICOS complex subunit Mic60 [OS=Saccharomyces cerevisiae S288c]                                           | 85388 | FCJ1; MIC60; YKR016W  | cell organization and biogenesis;transport                                                             | membrane;mitochondrion                  |                                                                         | 12.895 | 5.629  | 0.44 |
| P47127 | Altered inheritance of mitochondria protein 24, mitochondrial [OS=Saccharomyces cerevisiae S288c]         | 85354 | AIM24; YJR080C        | cell organization and biogenesis                                                                       | mitochondrion                           |                                                                         | 3.175  | 1.395  | 0.44 |
| P40185 | Protein mmf1, mitochondrial [OS=Saccharomyces cerevisiae S288c]                                           | 85476 | MMF1; YIL051C         | cell organization and biogenesis;metabolic process                                                     | mitochondrion;organelle lumen           |                                                                         | 9      | 4.012  | 0.45 |
| P39952 | Mitochondrial inner membrane protein OXA1 [OS=Saccharomyces cerevisiae S288c]                             | 85689 | OXA1; YER154W         | cell organization and biogenesis;transport                                                             | membrane;mitochondrion                  | transporter activity                                                    | 1.738  | 0.778  | 0.45 |
| P42949 | Mitochondrial import inner membrane translocase subunit TIM16 [OS=Saccharomyces cerevisiae S288c]         | 85334 | PAM16; YJL104W        | transport                                                                                              | membrane;mitochondrion                  | protein binding                                                         | 0.52   | 0.233  | 0.45 |
| P40098 | uncharacterized mitochondrial membrane protein FMP10 [OS=Saccharomyces cerevisiae S288c]                  | 85693 | FMP10; YER182W        |                                                                                                        | membrane;mitochondrion                  |                                                                         | 2.36   | 1.069  | 0.45 |

|          |                                                                                                                      |        |                        |                                                                                               |                                                          |                    |       |       |      |  |  |  |  |  |  |  |        |        |      |
|----------|----------------------------------------------------------------------------------------------------------------------|--------|------------------------|-----------------------------------------------------------------------------------------------|----------------------------------------------------------|--------------------|-------|-------|------|--|--|--|--|--|--|--|--------|--------|------|
|          | S288c]                                                                                                               |        |                        |                                                                                               |                                                          |                    |       |       |      |  |  |  |  |  |  |  |        |        |      |
| Q04172   | Sensitive to high expression protein 9, mitochondrial [OS=Saccharomyces cerevisiae S288c]                            | 852002 | SHE9; YDR393W          | cell organization and biogenesis                                                              | membrane;mitochondrion                                   |                    |       |       |      |  |  |  |  |  |  |  | 0.374  | 0.172  | 0.46 |
| P22353   | 54S ribosomal protein L8, mitochondrial [OS=Saccharomyces cerevisiae S288c]                                          | 853382 | MRPL8; YJL063C         | cell organization and biogenesis;metabolic process                                            | mitochondrion;ribosome                                   |                    |       |       |      |  |  |  |  |  |  |  | 0.359  | 0.166  | 0.46 |
| P39925   | Mitochondrial respiratory chain complexes assembly protein AFG3 [OS=Saccharomyces cerevisiae S288c]                  | 856737 | AFG3; YER017C          | cell organization and biogenesis;metabolic process;response to stimulus;transport             | membrane;mitochondrion                                   |                    |       |       |      |  |  |  |  |  |  |  | 1.228  | 0.569  | 0.46 |
| P38884   | Altered inheritance of mitochondria protein 18, mitochondrial [OS=Saccharomyces cerevisiae S288c]                    | 856605 | AIM18; YHR198C         | mitochondrion                                                                                 | mitochondrion                                            | catalytic activity | 0.311 | 0.145 | 0.47 |  |  |  |  |  |  |  |        |        |      |
| Q06493   | LETM1 domain-containing protein YLH47, mitochondrial [OS=Saccharomyces cerevisiae S288c]                             | 856243 | YLH47; YPR125W         | cell organization and biogenesis;transport                                                    | membrane;mitochondrion                                   |                    |       |       |      |  |  |  |  |  |  |  | 1.043  | 0.487  | 0.47 |
| P38071   | Enoyl-[acyl-carrier protein] reductase [NADPH, B-specific], mitochondrial [OS=Saccharomyces cerevisiae S288c]        | 852314 | ETR1; YBR026C          | metabolic process                                                                             | mitochondrion;organelle lumen                            |                    |       |       |      |  |  |  |  |  |  |  | 7.111  | 3.329  | 0.47 |
| P32335   | Protein MSS51, mitochondrial [OS=Saccharomyces cerevisiae S288c]                                                     | 850900 | MSS51; YLR203C         | metabolic process;regulation of biological process                                            | membrane;mitochondrion                                   |                    |       |       |      |  |  |  |  |  |  |  | 1.512  | 0.711  | 0.47 |
| Q01532-1 | Cysteine proteinase 1, mitochondrial [OS=Saccharomyces cerevisiae S288c]                                             |        | MCY1                   | metabolic process;regulation of biological process;response to stimulus                       | cytoplasm;mitochondrion                                  |                    |       |       |      |  |  |  |  |  |  |  | 0.179  | 0.086  | 0.48 |
| P21375   | Fumarate reductase 2 [OS=Saccharomyces cerevisiae S288c]                                                             | 853510 | OSM1; YJR051W          | metabolic process                                                                             | endoplasmic reticulum;mitochondrion                      |                    |       |       |      |  |  |  |  |  |  |  | 0.16   | 0.077  | 0.48 |
| Q12032   | Altered inheritance of mitochondria protein 41, mitochondrial [OS=Saccharomyces cerevisiae S288c]                    | 854390 | AIM41; YOR215C         | mitochondrion                                                                                 | mitochondrion                                            | catalytic activity | 1.61  | 0.778 | 0.48 |  |  |  |  |  |  |  |        |        |      |
| Q07349   | MIOREX complex component 9 [OS=Saccharomyces cerevisiae S288c]                                                       | 851535 | YDL027C; MRX9; YDL027C |                                                                                               | endoplasmic reticulum;membrane;mitochondrion             |                    |       |       |      |  |  |  |  |  |  |  | 1.913  | 0.931  | 0.49 |
| P40008   | Protein FMP52, mitochondrial [OS=Saccharomyces cerevisiae S288c]                                                     | 856721 | FMP52; YER004W         |                                                                                               | endoplasmic reticulum;membrane;mitochondrion             |                    |       |       |      |  |  |  |  |  |  |  | 2.162  | 1.054  | 0.49 |
| P53292   | 37S ribosomal protein S35, mitochondrial [OS=Saccharomyces cerevisiae S288c]                                         | 853075 | MRP535; YGR165W        | cell organization and biogenesis;metabolic process                                            | mitochondrion;ribosome                                   |                    |       |       |      |  |  |  |  |  |  |  | 1.512  | 0.738  | 0.49 |
| Q08822   | Probable electron transfer flavoprotein-ubiquinone oxidoreductase, mitochondrial [OS=Saccharomyces cerevisiae S288c] | 854538 | CIR2; YOR356W          | metabolic process;transport                                                                   | membrane;mitochondrion                                   |                    |       |       |      |  |  |  |  |  |  |  | 3.019  | 1.488  | 0.49 |
| P19882   | heat shock protein 60, mitochondrial [OS=Saccharomyces cerevisiae S288c]                                             | 850963 | HSP60; YLR259C         | cell organization and biogenesis;metabolic process;regulation of biological process;transport | cytoplasm;cytosol;membrane;mitochondrion;organelle lumen |                    |       |       |      |  |  |  |  |  |  |  | 23.816 | 11.743 | 0.49 |
| P33421   | Succinate dehydrogenase [ubiquinone] cytochrome b subunit, mitochondrial [OS=Saccharomyces cerevisiae S288c]         | 853716 | SDH3; YKL141W          | cell organization and biogenesis;metabolic process;transport                                  | membrane;mitochondrion                                   |                    |       |       |      |  |  |  |  |  |  |  | 1.276  | 0.638  | 0.50 |
| Q02776   | Mitochondrial import inner membrane translocase subunit TIM50 [OS=Saccharomyces cerevisiae S288c]                    | 856042 | TIM50; YPL063W         | cell organization and biogenesis;metabolic process;transport                                  | membrane;mitochondrion                                   |                    |       |       |      |  |  |  |  |  |  |  | 7.483  | 3.771  | 0.50 |
| P43616   | Cys-Gly metalloprotease 1 [OS=Saccharomyces cerevisiae S288c]                                                        | 850605 | DUG1; YFR044C          | metabolic process                                                                             | cytoplasm;mitochondrion;ribosome                         |                    |       |       |      |  |  |  |  |  |  |  | 1.154  | 0.585  | 0.51 |
| P00950   | Phosphoglycerate mutase 1 [OS=Saccharomyces cerevisiae S288c]                                                        | 853705 | GPM1; YKL152C          | metabolic process;regulation of biological process                                            | cytoplasm;cytosol;membrane;mitochondrion                 |                    |       |       |      |  |  |  |  |  |  |  | 2.981  | 1.512  | 0.51 |
| P07342   | Acetolactate synthase catalytic subunit, mitochondrial [OS=Saccharomyces cerevisiae S288c]                           | 855135 | ILV2; YMR108W          | metabolic process                                                                             | mitochondrion                                            |                    |       |       |      |  |  |  |  |  |  |  | 5.236  | 2.665  | 0.51 |
| P50085   | Prohibitin-2 [OS=Saccharomyces cerevisiae S288c]                                                                     | 853146 | PHB2; YGR231C          | cell organization and biogenesis;metabolic process;regulation of biological process           | membrane;mitochondrion                                   |                    |       |       |      |  |  |  |  |  |  |  | 4.926  | 2.511  | 0.51 |

|        |                                                                                                                                              |        |                        |                                                                                                             |                                         |                                                                             |        |        |      |
|--------|----------------------------------------------------------------------------------------------------------------------------------------------|--------|------------------------|-------------------------------------------------------------------------------------------------------------|-----------------------------------------|-----------------------------------------------------------------------------|--------|--------|------|
| P36066 | Protein MRG3-like [OS=Saccharomyces cerevisiae S288c]                                                                                        | 853725 | YKL133C; YKL133C       | metabolic process                                                                                           | membrane;mitochondrion                  | protein binding                                                             | 0.655  | 0.334  | 0.51 |
| P47045 | mitochondrial import inner membrane translocase subunit TIM54 [OS=Saccharomyces cerevisiae S288c]                                            | 853392 | TIM54; YJL054W         | cell organization and biogenesis;transport                                                                  | cytosol;membrane;mitochondrion          | transporter activity                                                        | 0.655  | 0.334  | 0.51 |
| P38072 | Protein SCO2, mitochondrial [OS=Saccharomyces cerevisiae S288c]                                                                              | 852312 | SCO2; YBR024W          | cell organization and biogenesis;cellular homeostasis;metabolic process;transport                           | membrane;mitochondrion                  | antioxidant activity;catalytic activity;metal ion binding                   | 1.404  | 0.73   | 0.52 |
| P04803 | Tryptophan--tRNA ligase, mitochondrial [OS=Saccharomyces cerevisiae S288c]                                                                   | 851861 | MSW1; YDR268W          | metabolic process                                                                                           | cytoplasm;mitochondrion;organelle lumen | catalytic activity;nucleotide binding                                       | 0.896  | 0.468  | 0.52 |
| P07257 | Cytochrome b-c1 complex subunit 2, mitochondrial [OS=Saccharomyces cerevisiae S288c]                                                         | 856321 | QCR2; YPR191W          | metabolic process;transport                                                                                 | membrane;mitochondrion                  | catalytic activity;metal ion binding;protein binding;transporter activity   | 33.551 | 17.588 | 0.52 |
| P32843 | Mitochondrial escape protein 2 [OS=Saccharomyces cerevisiae S288c]                                                                           | 855348 | YME2; YMR302C          | cell organization and biogenesis;metabolic process                                                          | membrane;mitochondrion                  | nucleotide binding;RNA binding                                              | 3.112  | 1.637  | 0.53 |
| P12695 | Dihydrolipoyllysine-residue acetyltransferase component of pyruvate dehydrogenase complex, mitochondrial [OS=Saccharomyces cerevisiae S288c] | 855653 | LAT1; YNL071W          | metabolic process                                                                                           | mitochondrion;organelle lumen           | catalytic activity                                                          | 7.003  | 3.758  | 0.54 |
| P36101 | tRNA threonylcarbamoyladenine dehydratase 2 [OS=Saccharomyces cerevisiae S288c]                                                              | 853841 | TCO2; YKL027W; YKL027W | metabolic process                                                                                           | cytosol;membrane;mitochondrion          | catalytic activity;nucleotide binding                                       | 0.616  | 0.334  | 0.54 |
| Q03028 | Mitochondrial 2-oxodicarboxylate carrier 1 [OS=Saccharomyces cerevisiae S288c]                                                               | 855969 | ODC1; YPL134C          | metabolic process;transport                                                                                 | membrane;mitochondrion                  | structural molecule activity;transporter activity                           | 7.799  | 4.275  | 0.55 |
| P38705 | Serine--tRNA ligase, mitochondrial [OS=Saccharomyces cerevisiae S288c]                                                                       | 856402 | DIA4; YHR011W          | metabolic process                                                                                           | cytoplasm;mitochondrion;organelle lumen | catalytic activity;nucleotide binding                                       | 0.417  | 0.233  | 0.56 |
| P37299 | cytochrome b-c1 complex subunit 10 [OS=Saccharomyces cerevisiae S288c]                                                                       | 856390 | QCR10; YHR001W-A       | metabolic process;transport                                                                                 | membrane;mitochondrion                  | catalytic activity;transporter activity                                     | 5.31   | 2.981  | 0.56 |
| P32904 | 54S ribosomal protein L6, mitochondrial [OS=Saccharomyces cerevisiae S288c]                                                                  | 856552 | MRPL6; YHR147C         | cell organization and biogenesis;metabolic process                                                          | mitochondrion;ribosome                  | RNA binding;structural molecule activity                                    | 1.371  | 0.778  | 0.57 |
| Q12233 | ATP synthase subunit g, mitochondrial [OS=Saccharomyces cerevisiae S288c]                                                                    | 856131 | ATP20; YPR020W         | cell organization and biogenesis;metabolic process;transport                                                | membrane;mitochondrion                  | catalytic activity;transporter activity                                     | 1.371  | 0.778  | 0.57 |
| P36147 | Presequence translocated-associated motor subunit pam17, mitochondrial [OS=Saccharomyces cerevisiae S288c]                                   | 853939 | PAM17; YKR065C         | transport                                                                                                   | membrane;mitochondrion                  |                                                                             | 1.371  | 0.778  | 0.57 |
| P53598 | Succinyl-CoA ligase [ADP-forming] subunit alpha, mitochondrial [OS=Saccharomyces cerevisiae S288c]                                           | 854310 | LSC1; YOR142W          | metabolic process                                                                                           | cytosol;mitochondrion                   | catalytic activity;nucleotide binding                                       | 9      | 5.158  | 0.57 |
| P32387 | 54S ribosomal protein L41, mitochondrial [OS=Saccharomyces cerevisiae S288c]                                                                 | 852014 | MRP20; YDR405W         | cell organization and biogenesis;metabolic process                                                          | mitochondrion;ribosome                  | nucleotide binding;protein binding;RNA binding;structural molecule activity | 1.254  | 0.719  | 0.57 |
| P33311 | ATP-dependent permease MDL2, mitochondrial [OS=Saccharomyces cerevisiae S288c]                                                               | 855858 | MDL2; YPL270W          | response to stimulus;transport                                                                              | membrane;mitochondrion                  | catalytic activity;nucleotide binding;transporter activity                  | 1.233  | 0.708  | 0.57 |
| P04710 | ADP,ATP carrier protein 1 [OS=Saccharomyces cerevisiae S288c]                                                                                | 855078 | AAC1; YMR056C          | metabolic process;transport                                                                                 | cytosol;membrane;mitochondrion          | structural molecule activity;transporter activity                           | 10.288 | 5.952  | 0.58 |
| Q12482 | Mitochondrial aspartate-glutamate transporter AGC1 [OS=Saccharomyces cerevisiae S288c]                                                       | 856132 | AGC1; YPR021C          | metabolic process;transport                                                                                 | membrane;mitochondrion                  | structural molecule activity;transporter activity                           | 0.407  | 0.238  | 0.58 |
| P40035 | Mitochondrial phosphate carrier protein 2 [OS=Saccharomyces cerevisiae S288c]                                                                | 856779 | PIC2; YER053C          | cellular homeostasis;metabolic process;transport                                                            | membrane;mitochondrion                  | structural molecule activity;transporter activity                           | 2.793  | 1.637  | 0.59 |
| P04840 | Mitochondrial outer membrane protein porin 1 [OS=Saccharomyces cerevisiae S288c]                                                             | 855669 | POR1; YNL055C          | cell death;cell organization and biogenesis;cellular homeostasis;regulation of biological process;transport | cytoplasm;membrane;mitochondrion        | transporter activity                                                        | 15.238 | 9      | 0.59 |

|        |                                                                                                   |            |                                       |                                                                                                  |                                                  |       |       |      |  |                                                                           |       |       |      |
|--------|---------------------------------------------------------------------------------------------------|------------|---------------------------------------|--------------------------------------------------------------------------------------------------|--------------------------------------------------|-------|-------|------|--|---------------------------------------------------------------------------|-------|-------|------|
| P00410 | Cytochrome c oxidase subunit 2 [OS=Saccharomyces cerevisiae S288c]                                | 85462<br>2 | COX2;<br>Q0250                        | metabolic process;transport                                                                      | membrane;mitochondrion                           |       |       |      |  | catalytic activity;metal ion binding;protein binding;transporter activity | 3.642 | 2.162 | 0.59 |
| Q08179 | Mitochondrial distribution and morphology protein 38 [OS=Saccharomyces cerevisiae S288c]          | 85413<br>0 | MDM3<br>8;<br>YOL027<br>C             | cell organization and biogenesis;cellular homeostasis;regulation of biological process;transport | membrane;mitochondrion                           |       |       |      |  |                                                                           | 5.683 | 3.467 | 0.61 |
| Q03798 | Altered inheritance of mitochondria protein 36, mitochondrial [OS=Saccharomyces cerevisiae S288c] | 85518<br>9 | AIM36;<br>YMR15<br>7C                 | membrane;mitochondrion                                                                           |                                                  | 1.336 | 0.833 | 0.62 |  |                                                                           |       |       |      |
| Q12298 | uncharacterized ABC transporter ATP-binding protein YDR061W [OS=Saccharomyces cerevisiae S288c]   | 85163<br>3 | YDR061<br>W;<br>YDR061<br>W           |                                                                                                  | mitochondrion                                    |       |       |      |  | catalytic activity;nucleotide binding                                     | 0.425 | 0.266 | 0.63 |
| P32332 | Mitochondrial oxaloacetate transport protein [OS=Saccharomyces cerevisiae S288c]                  | 85373<br>9 | OAC1;<br>YKL120<br>W                  | metabolic process;transport                                                                      | membrane;mitochondrion                           |       |       |      |  | structural molecule activity;transporter activity                         | 5.813 | 3.642 | 0.63 |
| P38152 | Tricarboxylate transport protein [OS=Saccharomyces cerevisiae S288c]                              | 85259<br>4 | CTP1;<br>YBR291<br>C                  | metabolic process;transport                                                                      | membrane;mitochondrion                           |       |       |      |  | structural molecule activity;transporter activity                         | 0.389 | 0.245 | 0.63 |
| Q06143 | mitochondrial dicarboxylate transporter [OS=Saccharomyces cerevisiae S288c]                       | 85106<br>3 | DIC1;<br>YLR348<br>C                  | metabolic process;transport                                                                      | membrane;mitochondrion                           |       |       |      |  | structural molecule activity;transporter activity                         | 1.154 | 0.73  | 0.63 |
| Q05648 | MIOREX complex component 10 [OS=Saccharomyces cerevisiae S288c]                                   | 85187<br>6 | YDR282<br>C;<br>MRX10;<br>YDR282<br>C |                                                                                                  | membrane;mitochondrion                           |       |       |      |  |                                                                           | 0.35  | 0.222 | 0.63 |
| P38702 | mitochondrial carrier protein LEU5 [OS=Saccharomyces cerevisiae S288c]                            | 85639<br>1 | LEU5;<br>YHR002<br>W                  | metabolic process;transport                                                                      | membrane;mitochondrion                           |       |       |      |  | structural molecule activity;transporter activity                         | 0.334 | 0.212 | 0.63 |
| P40012 | protoporphyrinogen oxidase [OS=Saccharomyces cerevisiae S288c]                                    | 85673<br>3 | HEM14<br>;<br>YER014<br>W             | metabolic process                                                                                | membrane;mitochondrion                           |       |       |      |  | catalytic activity                                                        | 1.482 | 0.947 | 0.64 |
| P32266 | Dynamine-like GTPase MGM1, mitochondrial [OS=Saccharomyces cerevisiae S288c]                      | 85438<br>6 | MGM1;<br>YOR211<br>C                  | cell organization and biogenesis                                                                 | membrane;mitochondrion                           |       |       |      |  | catalytic activity;nucleotide binding;protein binding                     | 0.28  | 0.179 | 0.64 |
| P38969 | Pentamidine resistance factor, mitochondrial [OS=Saccharomyces cerevisiae S288c]                  | 85444<br>0 | PNT1;<br>YOR266<br>W                  | cell organization and biogenesis;response to stimulus                                            | membrane;mitochondrion                           |       |       |      |  |                                                                           | 0.259 | 0.166 | 0.64 |
| P07236 | Threonine-tRNA ligase, mitochondrial [OS=Saccharomyces cerevisiae S288c]                          | 85364<br>0 | MST1;<br>YKL194<br>C                  | metabolic process                                                                                | cytoplasm;mitochondrion;organelle lumen          |       |       |      |  | catalytic activity;nucleotide binding;RNA binding                         | 0.233 | 0.15  | 0.64 |
| P09457 | ATP synthase subunit 5, mitochondrial [OS=Saccharomyces cerevisiae S288c]                         | 85189<br>2 | ATP5;<br>YDR298<br>C                  | metabolic process;transport                                                                      | membrane;mitochondrion                           |       |       |      |  | catalytic activity;transporter activity                                   | 9     | 5.813 | 0.65 |
| P54783 | D-arabinono-1,4-lactone oxidase [OS=Saccharomyces cerevisiae S288c]                               | 85488<br>8 | ALO1;<br>YML08<br>6C                  | metabolic process;response to stimulus                                                           | membrane;mitochondrion                           |       |       |      |  | catalytic activity;nucleotide binding                                     | 3.299 | 2.162 | 0.66 |
| Q08223 | Altered inheritance of mitochondria protein 39, mitochondrial [OS=Saccharomyces cerevisiae S288c] | 85410<br>3 | AIM39;<br>YOL053<br>W                 | cytosol;membrane;mitochondrion                                                                   |                                                  | 0.711 | 0.468 | 0.66 |  |                                                                           |       |       |      |
| P07213 | Mitochondrial import receptor subunit TOM70 [OS=Saccharomyces cerevisiae S288c]                   | 85560<br>2 | TOM70<br>;<br>YNL121<br>C             | cell organization and biogenesis;transport                                                       | membrane;mitochondrion                           |       |       |      |  | protein binding;transporter activity                                      | 1.728 | 1.154 | 0.67 |
| P53311 | Mitochondrial pyruvate carrier 3 [OS=Saccharomyces cerevisiae S288c]                              | 85315<br>8 | FMP43;<br>MPC3;<br>YGR243<br>W        | transport                                                                                        | membrane;mitochondrion                           |       |       |      |  | transporter activity                                                      | 1.154 | 0.778 | 0.67 |
| P00359 | Glyceraldehyde-3-phosphate dehydrogenase 3 [OS=Saccharomyces cerevisiae S288c]                    | 85310<br>6 | TDH3;<br>YGR192<br>C                  | cell death;metabolic process                                                                     | cytoplasm;cytosol;membrane;mitochondrion;nucleus |       |       |      |  | catalytic activity;nucleotide binding;RNA binding                         | 3.962 | 2.675 | 0.68 |
| P38325 | Mitochondrial outer membrane protein OM14 [OS=Saccharomyces cerevisiae S288c]                     | 85253<br>1 | OM14;<br>YBR230<br>C                  | transport                                                                                        | membrane;mitochondrion                           |       |       |      |  |                                                                           | 9     | 6.197 | 0.69 |
| P54003 | Protein SUR7 [OS=Saccharomyces cerevisiae S288c]                                                  | 85495<br>3 | SUR7;<br>YML05<br>2W                  | cell differentiation;transport                                                                   | membrane;mitochondrion                           |       |       |      |  |                                                                           | 0.848 | 0.585 | 0.69 |
| Q99297 | Mitochondrial 2-oxodicarboxylate carrier 2 [OS=Saccharomyces cerevisiae S288c]                    | 85439<br>7 | ODC2;<br>YOR222<br>W                  | metabolic process;transport                                                                      | membrane;mitochondrion                           |       |       |      |  | structural molecule activity;transporter activity                         | 0.778 | 0.54  | 0.69 |

|        |                                                                                                                |        |                  |                                                                                      |                                                       |                                                            |         |         |      |
|--------|----------------------------------------------------------------------------------------------------------------|--------|------------------|--------------------------------------------------------------------------------------|-------------------------------------------------------|------------------------------------------------------------|---------|---------|------|
| P53220 | Mitochondrial import inner membrane translocase subunit TIM21 [OS=Saccharomyces cerevisiae S288c]              | 852921 | TIM21; YGR033C   | cell organization and biogenesis;transport                                           | membrane;mitochondrion                                | protein binding                                            | 0.719   | 0.501   | 0.70 |
| Q12251 | Uncharacterized mitochondrial carrier YPR011C [OS=Saccharomyces cerevisiae S288c]                              | 856121 | YPR011C; YPR011C | metabolic process;transport                                                          | membrane;mitochondrion                                | structural molecule activity;transporter activity          | 0.551   | 0.389   | 0.71 |
| P36163 | mitochondrial metalloendopeptidase OMA1 [OS=Saccharomyces cerevisiae S288c]                                    | 853962 | OMA1; YKR087C    | metabolic process                                                                    | membrane;mitochondrion                                | catalytic activity;metal ion binding                       | 0.551   | 0.389   | 0.71 |
| P00424 | Cytochrome c oxidase polypeptide 5A, mitochondrial [OS=Saccharomyces cerevisiae S288c]                         | 855675 | COX5A; YNL052W   | metabolic process;transport                                                          | membrane;mitochondrion                                | catalytic activity;transporter activity                    | 1.848   | 1.31    | 0.71 |
| Q03327 | Mitochondrial fusion and transport protein Ugo1 [OS=Saccharomyces cerevisiae S288c]                            | 852081 | UGO1; YDR470C    | cell organization and biogenesis;metabolic process                                   | membrane;mitochondrion                                | protein binding;structural molecule activity               | 0.425   | 0.304   | 0.72 |
| Q02883 | N-acyl-phosphatidylethanolamine-hydrolyzing phospholipase D, mitochondrial [OS=Saccharomyces cerevisiae S288c] | 856001 | FMP30; YPL103C   | metabolic process                                                                    | membrane;mitochondrion                                | catalytic activity;metal ion binding                       | 0.425   | 0.304   | 0.72 |
| P53969 | Sorting assembly machinery 50 kDa subunit [OS=Saccharomyces cerevisiae S288c]                                  | 855705 | SAM50; YNL026W   | cell organization and biogenesis;transport                                           | membrane;mitochondrion                                | protein binding;transporter activity                       | 0.374   | 0.269   | 0.72 |
| P40215 | External NADH-ubiquinone oxidoreductase 1, mitochondrial [OS=Saccharomyces cerevisiae S288c]                   | 855176 | NDE1; YMR145C    | metabolic process                                                                    | mitochondrion                                         | catalytic activity;nucleotide binding                      | 5.469   | 4.043   | 0.74 |
| P38988 | Mitochondrial GTP/GDP carrier protein 1 [OS=Saccharomyces cerevisiae S288c]                                    | 851329 | GGC1; YDL198C    | cell organization and biogenesis;cellular homeostasis;metabolic process;transport    | membrane;mitochondrion                                | structural molecule activity;transporter activity          | 3.642   | 2.728   | 0.75 |
| Q04935 | Cytochrome c oxidase protein 20, mitochondrial [OS=Saccharomyces cerevisiae S288c]                             | 851817 | COX20; YDR231C   | cell organization and biogenesis;metabolic process                                   | membrane;mitochondrion                                | protein binding                                            | 1.894   | 1.424   | 0.75 |
| Q04458 | Fatty aldehyde dehydrogenase HFD1 [OS=Saccharomyces cerevisiae S288c]                                          | 855137 | HFD1; YMR110C    | metabolic process                                                                    | endoplasmic reticulum;endosome;membrane;mitochondrion | catalytic activity                                         | 1.783   | 1.346   | 0.75 |
| P25087 | Sterol 24-C-methyltransferase [OS=Saccharomyces cerevisiae S288c]                                              | 855003 | ERG6; YML008C    | metabolic process                                                                    | endoplasmic reticulum;membrane;mitochondrion          | catalytic activity                                         | 0.557   | 0.425   | 0.76 |
| Q08970 | Mitochondrial metal transporter 2 [OS=Saccharomyces cerevisiae S288c]                                          | 855877 | MMT2; YPL224C    | cellular homeostasis;regulation of biological process;response to stimulus;transport | membrane;mitochondrion                                | transporter activity                                       | 0.532   | 0.407   | 0.77 |
| P53721 | Respiratory supercomplex factor 2, mitochondrial [OS=Saccharomyces cerevisiae S288c]                           | 855752 | RCF2; YNR018W    | cell organization and biogenesis                                                     | membrane;mitochondrion                                |                                                            | 7.111   | 5.579   | 0.78 |
| P07253 | cytochrome B pre-mRNA-processing protein 6 [OS=Saccharomyces cerevisiae S288c]                                 | 852417 | CBP6; YBR120C    | cell organization and biogenesis;metabolic process;regulation of biological process  | mitochondrion;ribosome                                |                                                            | 2.728   | 2.162   | 0.79 |
| P38077 | ATP synthase subunit gamma, mitochondrial [OS=Saccharomyces cerevisiae S288c]                                  | 852327 | ATP3; YBR039W    | metabolic process;transport                                                          | membrane;mitochondrion                                | catalytic activity;transporter activity                    | 11.328  | 9       | 0.79 |
| P40508 | Uncharacterized protein YIL077C [OS=Saccharomyces cerevisiae S288c]                                            | 854733 | YIL077C; YIL077C |                                                                                      | mitochondrion                                         |                                                            | 1.448   | 1.154   | 0.80 |
| P38127 | mitochondrial carrier protein RIM2 [OS=Saccharomyces cerevisiae S288c]                                         | 852491 | RIM2; YBR192W    | cell organization and biogenesis;metabolic process;transport                         | membrane;mitochondrion                                | structural molecule activity;transporter activity          | 1.239   | 0.995   | 0.80 |
| P27697 | Atypical kinase COQ8, mitochondrial [OS=Saccharomyces cerevisiae S288c]                                        | 852758 | COQ8; YGL119W    | metabolic process                                                                    | membrane;mitochondrion;organelle lumen                | catalytic activity;nucleotide binding                      | 0.453   | 0.365   | 0.81 |
| P18239 | ADP,ATP carrier protein 2 [OS=Saccharomyces cerevisiae S288c]                                                  | 852250 | PET9; YBL030C    | cell death;metabolic process;transport                                               | membrane;mitochondrion                                | structural molecule activity;transporter activity          | 135.887 | 110.034 | 0.81 |
| P53206 | putative cysteine synthase [OS=Saccharomyces cerevisiae S288c]                                                 | 852895 | YGR012W; YGR012W | metabolic process                                                                    |                                                       | catalytic activity                                         | 0.817   | 0.668   | 0.82 |
| P33310 | ATP-dependent permease MDL1, mitochondrial [OS=Saccharomyces cerevisiae S288c]                                 | 850885 | MDL1; YLR188W    | transport                                                                            | membrane;mitochondrion                                | catalytic activity;nucleotide binding;transporter activity | 0.624   | 0.528   | 0.85 |
| P05626 | ATP synthase subunit 4, mitochondrial                                                                          | 856027 | ATP4; YPL078     | cell organization and biogenesis;metabolic                                           | membrane;mitochondrion                                | catalytic activity;transport                               | 3.642   | 3.084   | 0.85 |



|        |                                                                                                           |         |                  |                                                              |                                                               |                                                       |        |        |      |
|--------|-----------------------------------------------------------------------------------------------------------|---------|------------------|--------------------------------------------------------------|---------------------------------------------------------------|-------------------------------------------------------|--------|--------|------|
|        | [OS=Saccharomyces cerevisiae S288c]                                                                       |         | C                | process;transport                                            |                                                               | er activity                                           |        |        |      |
| P25349 | Flavoprotein-like protein YCP4 [OS=Saccharomyces cerevisiae S288c]                                        | 850360  | YCP4; YCR004C    | metabolic process;regulation of biological process           | cytoplasm;membrane;mitochondrion                              | catalytic activity;nucleotide binding;protein binding | 6.743  | 5.813  | 0.86 |
| P40086 | Cytochrome c oxidase assembly protein cox15 [OS=Saccharomyces cerevisiae S288c]                           | 856884  | COX15; YER141W   | cell organization and biogenesis;metabolic process;transport | membrane;mitochondrion                                        | catalytic activity;transporter activity               | 1.555  | 1.346  | 0.87 |
| Q01852 | Mitochondrial import inner membrane translocase subunit TIM44 [OS=Saccharomyces cerevisiae S288c]         | 854790  | TIM44; YIL022W   | transport                                                    | membrane;mitochondrion                                        | nucleotide binding;protein binding                    | 4.125  | 3.758  | 0.91 |
| P00890 | citrate synthase, mitochondrial [OS=Saccharomyces cerevisiae S288c]                                       | 855732  | CIT1; YNR001C    | metabolic process;transport                                  | cytosol;mitochondrion;organelle lumen                         | catalytic activity                                    | 11.798 | 10.788 | 0.91 |
| Q08023 | Protein FMP25, mitochondrial [OS=Saccharomyces cerevisiae S288c]                                          | 850766  | FMP25; YLR077W   | cell organization and biogenesis                             | membrane;mitochondrion                                        |                                                       | 0.968  | 0.968  | 1.00 |
| P25573 | Mitochondrial inner membrane i-AAA protease supercomplex subunit MGR1 [OS=Saccharomyces cerevisiae S288c] | 850313  | MGR1; YCL044C    | metabolic process                                            | membrane;mitochondrion                                        | protein binding                                       | 0.701  | 0.701  | 1.00 |
| P08466 | mitochondrial nuclease [OS=Saccharomyces cerevisiae S288c]                                                | 853222  | NUC1; YJL208C    | cell death;metabolic process                                 | membrane;mitochondrion;nucleus                                | catalytic activity;metal ion binding                  | 1.336  | 1.336  | 1.00 |
| P00360 | glyceraldehyde-3-phosphate dehydrogenase 1 [OS=Saccharomyces cerevisiae S288c]                            | 853395  | TDH1; YJL052W    | metabolic process                                            | cytoplasm;cytosol;membrane;mitochondrion                      | catalytic activity;nucleotide binding                 | 0.823  | 0.823  | 1.00 |
| Q01574 | acetyl-coenzyme A synthetase 1 [OS=Saccharomyces cerevisiae S288c]                                        | 851245  | ACS1; YAL054C    | cell organization and biogenesis;metabolic process           | cytoplasm;cytosol;endoplasmic reticulum;mitochondrion;nucleus | catalytic activity;nucleotide binding                 | 0.624  | 0.624  | 1.00 |
| Q06668 | Methyltransferase OMS1, mitochondrial [OS=Saccharomyces cerevisiae S288c]                                 | 851911  | OMS1; YDR316W    | metabolic process                                            | membrane;mitochondrion                                        | catalytic activity                                    | 0.484  | 0.484  | 1.00 |
| Q12375 | mitochondrial ornithine transporter 1 [OS=Saccharomyces cerevisiae S288c]                                 | 854297  | ORT1; YOR130C    | metabolic process;transport                                  | membrane;mitochondrion                                        | structural molecule activity;transporter activity     | 0.54   | 0.54   | 1.00 |
| P53163 | 54S ribosomal protein L12, mitochondrial [OS=Saccharomyces cerevisiae S288c]                              | 852811  | MNP1; YGL068W    | cell organization and biogenesis;metabolic process           | mitochondrion;ribosome                                        | RNA binding;structural molecule activity              | 1.31   | 1.31   | 1.00 |
| P40496 | 37S ribosomal protein S25, mitochondrial [OS=Saccharomyces cerevisiae S288c]                              | 854715  | RSM25; YIL093C   | cell organization and biogenesis;metabolic process           | mitochondrion;ribosome                                        | structural molecule activity                          | 0.468  | 0.468  | 1.00 |
| P39533 | Homocitrate dehydratase, mitochondrial [OS=Saccharomyces cerevisiae S288c]                                | 853230  | ACO2; YJL200C    | metabolic process                                            | mitochondrion                                                 | catalytic activity;metal ion binding                  | 0.17   | 0.17   | 1.00 |
| P34224 | Uncharacterized protein YBL059W [OS=Saccharomyces cerevisiae S288c]                                       | 852221  | YBL059W; YBL059W |                                                              | membrane;mitochondrion                                        |                                                       | 0.468  | 0.468  | 1.00 |
| P34222 | Peptidyl-tRNA hydrolase 2 [OS=Saccharomyces cerevisiae S288c]                                             | 852223  | PTH2; YBL057C    | regulation of biological process                             | cytoplasm;cytosol;membrane;mitochondrion                      | catalytic activity;protein binding                    | 0.425  | 0.425  | 1.00 |
| Q2V2P9 | Uncharacterized protein YDR119W-A [OS=Saccharomyces cerevisiae S288c]                                     | 3799970 | COX26; YDR119W-A |                                                              | membrane;mitochondrion                                        |                                                       | 1.154  | 1.154  | 1.00 |
| Q06510 | Lysophosphatidylcholine acyltransferase [OS=Saccharomyces cerevisiae S288c]                               | 856262  | TAZ1; YPR140W    | cell organization and biogenesis;metabolic process;transport | membrane;mitochondrion                                        | catalytic activity                                    | 0.194  | 0.194  | 1.00 |
| P54857 | lipase 2 [OS=Saccharomyces cerevisiae S288c]                                                              | 851628  | TGL2; YDR058C    | metabolic process;transport                                  | mitochondrion                                                 | catalytic activity                                    | 0.369  | 0.369  | 1.00 |
| P32463 | Acyl carrier protein, mitochondrial [OS=Saccharomyces cerevisiae S288c]                                   | 853642  | ACP1; YKL192C    | metabolic process;transport                                  | mitochondrion                                                 |                                                       | 0.259  | 0.259  | 1.00 |
| Q05867 | Uncharacterized protein YLR283W, mitochondrial [OS=Saccharomyces cerevisiae S288c]                        | 850988  | YLR283W; YLR283W | endoplasmic reticulum;membrane;mitochondrion                 |                                                               |                                                       | 0.11   | 0.11   | 1.00 |
| P40581 | peroxiredoxin HYR1 [OS=Saccharomyces cerevisiae S288c]                                                    | 854855  | HYR1; YIR037W    | metabolic process;response to stimulus                       | cytoplasm;cytosol;mitochondrion;organelle lumen               | antioxidant activity;catalytic activity               | 0.259  | 0.259  | 1.00 |
| Q12328 | Mitochondrial import inner membrane translocase subunit TIM22 [OS=Saccharomyces cerevisiae S288c]         | 851309  | TIM22; YDL217C   | cell organization and biogenesis;transport                   | cytosol;membrane;mitochondrion                                | protein binding;transporter activity                  | 0.233  | 0.233  | 1.00 |
| P04039 | Cytochrome c oxidase polypeptide VIII, mitochondrial                                                      | 851111  | COX8; YLR395     | metabolic process;transport                                  | membrane;mitochondrion                                        | catalytic activity;transport                          | 0.778  | 0.778  | 1.00 |

|        |                                                                                            |        |                      |                                                                                                                                              |                                                   |  |       |       |      |                                                                                                    |        |        |      |
|--------|--------------------------------------------------------------------------------------------|--------|----------------------|----------------------------------------------------------------------------------------------------------------------------------------------|---------------------------------------------------|--|-------|-------|------|----------------------------------------------------------------------------------------------------|--------|--------|------|
|        | [OS=Saccharomyces cerevisiae S288c]                                                        |        | C                    |                                                                                                                                              |                                                   |  |       |       |      | er activity                                                                                        |        |        |      |
| P38816 | thioredoxin reductase 2, mitochondrial [OS=Saccharomyces cerevisiae S288c]                 | 856506 | TRR2; YHR106W        | cellular homeostasis;metabolic process;regulation of biological process;response to stimulus                                                 | cytoplasm;mitochondrion                           |  |       |       |      | antioxidant activity;catalytic activity                                                            | 0.136  | 0.136  | 1.00 |
| P14693 | sorting assembly machinery 35 kDa subunit [OS=Saccharomyces cerevisiae S288c]              | 856483 | SAM35; YHR083W       | cell organization and biogenesis;transport                                                                                                   | membrane;mitochondrion                            |  |       |       |      | protein binding                                                                                    | 0.334  | 0.334  | 1.00 |
| Q02863 | ubiquitin carboxyl-terminal hydrolase 16 [OS=Saccharomyces cerevisiae S288c]               | 856032 | UBP16; YPL072W       | metabolic process                                                                                                                            | membrane;mitochondrion                            |  |       |       |      | catalytic activity                                                                                 | 0.072  | 0.072  | 1.00 |
| P00358 | glyceraldehyde-3-phosphate dehydrogenase 2 [OS=Saccharomyces cerevisiae S288c]             | 853465 | TDH2; YJR009C        | cell death;metabolic process                                                                                                                 | cytoplasm;cytosol;membrane;mitochondrion ;nucleus |  |       |       |      | catalytic activity;nucleotide binding;protein binding                                              | 1.721  | 2.008  | 1.17 |
| P21560 | Protein CBP3, mitochondrial [OS=Saccharomyces cerevisiae S288c]                            | 855886 | CBP3; YPL215W        | cell organization and biogenesis;regulation of biological process                                                                            | membrane;mitochondrion;ribosome                   |  |       |       |      |                                                                                                    | 1.031  | 1.219  | 1.18 |
| P08539 | Guanine nucleotide-binding protein alpha-1 subunit [OS=Saccharomyces cerevisiae S288c]     | 856394 | GPA1; YHR005C        | cell organization and biogenesis;cellular component movement;regulation of biological process;response to stimulus;transport                 | cytosol;endosome;membrane                         |  |       |       |      | catalytic activity;metal ion binding;nucleotide binding;protein binding;signal transducer activity | 0.682  | 0.812  | 1.19 |
| P22136 | ATPase expression protein 2, mitochondrial [OS=Saccharomyces cerevisiae S288c]             | 855325 | AEP2; YMR282C        | metabolic process;regulation of biological process                                                                                           | mitochondrion                                     |  |       |       |      | RNA binding                                                                                        | 0.359  | 0.431  | 1.20 |
| P40416 | Iron-sulfur clusters transporter ATM1, mitochondrial [OS=Saccharomyces cerevisiae S288c]   | 855347 | ATM1; YMR301C        | cellular homeostasis;metabolic process;transport                                                                                             | membrane;mitochondrion                            |  |       |       |      | catalytic activity;nucleotide binding;transporter activity                                         | 0.453  | 0.546  | 1.21 |
| P53982 | isocitrate dehydrogenase [NADP] [OS=Saccharomyces cerevisiae S288c]                        | 855723 | IDP3; YNL009W        | metabolic process                                                                                                                            | cytoplasm;mitochondrion                           |  |       |       |      | catalytic activity;metal ion binding;nucleotide binding                                            | 1.943  | 2.398  | 1.23 |
| P00560 | Phosphoglycerate kinase [OS=Saccharomyces cerevisiae S288c]                                | 850370 | PGK1; YCR012W        | metabolic process                                                                                                                            | cytoplasm;membrane;mitochondrion                  |  |       |       |      | catalytic activity;nucleotide binding                                                              | 2.415  | 2.981  | 1.23 |
| Q07651 | SUR7 family protein FMP45 [OS=Saccharomyces cerevisiae S288c]                              | 851304 | FMP45; YDL222C       | cell differentiation;cell organization and biogenesis                                                                                        | membrane;mitochondrion                            |  |       |       |      |                                                                                                    | 3.125  | 3.924  | 1.26 |
| P10823 | Guanine nucleotide-binding protein alpha-2 subunit [OS=Saccharomyces cerevisiae S288c]     | 856741 | GPA2; YER020W        | cell differentiation;cell growth;cell organization and biogenesis;cellular homeostasis;regulation of biological process;response to stimulus | cytosol;membrane;mitochondrion                    |  |       |       |      | catalytic activity;metal ion binding;nucleotide binding;protein binding;signal transducer activity | 0.978  | 1.346  | 1.38 |
| P53230 | Phosphatidate cytidyltransferase, mitochondrial [OS=Saccharomyces cerevisiae S288c]        | 852937 | TAM41; YGR046W       | metabolic process                                                                                                                            | membrane;mitochondrion;organelle lumen            |  |       |       |      | catalytic activity                                                                                 | 0.292  | 0.407  | 1.39 |
| P50087 | MICOS subunit MIC26 [OS=Saccharomyces cerevisiae S288c]                                    | 853150 | MOS2; MIC26; YGR235C | cell organization and biogenesis                                                                                                             | membrane;mitochondrion                            |  |       |       |      |                                                                                                    | 0.638  | 0.931  | 1.46 |
| P32792 | UPF0744 protein YSC83 [OS=Saccharomyces cerevisiae S288c]                                  | 856410 | YSC83; YHR017W       |                                                                                                                                              | membrane;mitochondrion                            |  | 0.233 | 0.369 | 1.58 |                                                                                                    |        |        |      |
| P32378 | 4-hydroxybenzoate polyprenyltransferase, mitochondrial [OS=Saccharomyces cerevisiae S288c] | 855778 | COQ2; YNR041C        | metabolic process;transport                                                                                                                  | membrane;mitochondrion                            |  |       |       |      | catalytic activity                                                                                 | 0.292  | 0.468  | 1.60 |
| Q12289 | mitochondrial carnitine carrier [OS=Saccharomyces cerevisiae S288c]                        | 854267 | CRC1; YOR100C        | metabolic process;transport                                                                                                                  | membrane;mitochondrion                            |  |       |       |      | structural molecule activity;transporter activity                                                  | 0.931  | 1.683  | 1.81 |
| Q08245 | protein ZEO1 [OS=Saccharomyces cerevisiae S288c]                                           | 854040 | ZEO1; YOL109W        | cell organization and biogenesis                                                                                                             | membrane;mitochondrion                            |  |       |       |      | protein binding                                                                                    | 2.162  | 4.012  | 1.86 |
| Q12230 | Sphingolipid long chain base-responsive protein LSP1 [OS=Saccharomyces cerevisiae S288c]   | 856103 | LSP1; YPL004C        | regulation of biological process;response to stimulus;transport                                                                              | cytoplasm;membrane;mitochondrion                  |  |       |       |      |                                                                                                    | 14.849 | 28.286 | 1.90 |
| Q12466 | tricalbin-1 [OS=Saccharomyces cerevisiae S288c]                                            | 854253 | TCB1; YOR086C        | cell organization and biogenesis;regulation of biological process                                                                            | endoplasmic reticulum;membrane;mitochondrion      |  |       |       |      | metal ion binding;protein binding                                                                  | 0.191  | 0.369  | 1.93 |
| Q06405 | ATP synthase subunit f, mitochondrial [OS=Saccharomyces cerevisiae S288c]                  | 851983 | ATP17; YDR377W       | metabolic process;transport                                                                                                                  | membrane;mitochondrion                            |  |       |       |      | catalytic activity;transporter activity                                                            | 1.512  | 2.981  | 1.97 |
| P38909 | cytochrome c mitochondrial import factor CYC2                                              | 854202 | CYC2; YOR037         | cell organization and biogenesis;metabolic process                                                                                           | membrane;mitochondrion                            |  |       |       |      | catalytic activity                                                                                 | 0.093  | 0.194  | 2.09 |

|        |                                                                                                           |            |                                      |                                                                                                                                           |  |                                                                |       |                                                                   |       |       |       |  |  |
|--------|-----------------------------------------------------------------------------------------------------------|------------|--------------------------------------|-------------------------------------------------------------------------------------------------------------------------------------------|--|----------------------------------------------------------------|-------|-------------------------------------------------------------------|-------|-------|-------|--|--|
|        | [OS=Saccharomyces cerevisiae S288c]                                                                       |            | W                                    |                                                                                                                                           |  |                                                                |       |                                                                   |       |       |       |  |  |
| Q04472 | Mitochondrial inner membrane i-AAA protease supercomplex subunit MGR3 [OS=Saccharomyces cerevisiae S288c] | 85514<br>2 | MGR3;<br>YMR11<br>5W                 | metabolic process                                                                                                                         |  | membrane;mitochondrion                                         |       | protein binding                                                   | 0.15  | 0.322 | 2.15  |  |  |
| P29311 | Protein BMH1 [OS=Saccharomyces cerevisiae S288c]                                                          | 85692<br>4 | BMH1;<br>YER177<br>W                 | cell differentiation;cell growth;cell organization and biogenesis;metabolic process;regulation of biological process;response to stimulus |  | cytoplasm;membrane;nucleus                                     |       | DNA binding;protein binding                                       | 0.136 | 0.292 | 2.15  |  |  |
| Q00873 | cytochrome c1 heme lyase [OS=Saccharomyces cerevisiae S288c]                                              | 85377<br>5 | CYT2;<br>YKL087<br>C                 | cell organization and biogenesis;metabolic process                                                                                        |  | membrane;mitochondrion                                         |       | catalytic activity;metal ion binding                              | 0.166 | 0.359 | 2.16  |  |  |
| P38626 | NADH-cytochrome b5 reductase 1 [OS=Saccharomyces cerevisiae S288c]                                        | 85476<br>8 | CBR1;<br>YIL043C                     | metabolic process                                                                                                                         |  | endoplasmic reticulum;membrane;mitochondrion;nucleus           |       | catalytic activity                                                | 0.334 | 0.778 | 2.33  |  |  |
| P16603 | NADPH--cytochrome P450 reductase [OS=Saccharomyces cerevisiae S288c]                                      | 85643<br>8 | NCP1;<br>YHR042<br>W                 | metabolic process                                                                                                                         |  | cytoplasm;cytosol;endoplasmic reticulum;membrane;mitochondrion |       | catalytic activity;metal ion binding;nucleotide binding           | 0.194 | 0.604 | 3.11  |  |  |
| Q02981 | ABC1 family protein YPL109C, mitochondrial [OS=Saccharomyces cerevisiae S288c]                            | 85599<br>5 | YPL109<br>C;<br>YPL109<br>C          | mitochondrion                                                                                                                             |  |                                                                | 0.059 | 0.259                                                             | 4.39  |       |       |  |  |
| P54115 | Magnesium-activated aldehyde dehydrogenase, cytosolic [OS=Saccharomyces cerevisiae S288c]                 | 85604<br>4 | ALD6;<br>YPL061<br>W                 | metabolic process;response to stimulus                                                                                                    |  | cytoplasm;cytosol;mitochondrion                                |       | catalytic activity                                                | 0.077 | 0.346 | 4.49  |  |  |
| P34231 | Uncharacterized protein YKL187C [OS=Saccharomyces cerevisiae S288c]                                       | 85364<br>8 | FAT3;<br>YKL187<br>C;<br>YKL187<br>C | cell organization and biogenesis;transport                                                                                                |  | membrane;mitochondrion                                         |       |                                                                   | 0.093 | 0.425 | 4.57  |  |  |
| P28737 | Protein MSP1 [OS=Saccharomyces cerevisiae S288c]                                                          | 85291<br>5 | MSP1;<br>YGR028<br>W                 | cell organization and biogenesis;metabolic process;regulation of biological process;response to stimulus;transport                        |  | membrane;mitochondrion;nucleus                                 |       | catalytic activity;nucleotide binding;protein binding;RNA binding | 0.122 | 0.585 | 4.80  |  |  |
| P38825 | Protein TOM71 [OS=Saccharomyces cerevisiae S288c]                                                         | 85651<br>7 | TOM71<br>;<br>YHR117<br>W            | transport                                                                                                                                 |  | membrane;mitochondrion                                         |       | protein binding;transport er activity                             | 0.061 | 0.512 | 8.39  |  |  |
| P39518 | Long-chain-fatty-acid--CoA ligase 2 [OS=Saccharomyces cerevisiae S288c]                                   | 85673<br>4 | FAA2;<br>YER015<br>W                 | metabolic process;transport                                                                                                               |  | cytoplasm;mitochondrion                                        |       | catalytic activity;nucleotide binding                             | 0.055 | 0.619 | 11.25 |  |  |
| Q03640 | Tricalbin-3 [OS=Saccharomyces cerevisiae S288c]                                                           | 85490<br>3 | TCB3;<br>YML07<br>2C                 | cell organization and biogenesis;regulation of biological process                                                                         |  | endoplasmic reticulum;membrane;mitochondrion                   |       | metal ion binding;protein binding                                 | 0.032 | 0.365 | 11.41 |  |  |

**Supplemental Table S11. The relative concentrations of proteins in mitochondria purified from WT or *ups2Δ* cells cultured without LCA.** Mitochondria were purified from WT or *ups2Δ* cells recovered on day 4 of cell culturing without LCA. Mass spectrometry-based identification and quantitation of proteins recovered in purified mitochondria were performed as described in Materials and methods. The exponentially modified protein abundance index (emPAI) provided by the "Proteome Discoverer" software was used to calculate the relative abundance of mitochondrial proteins between specified datasets. Data on the relative concentrations of mitochondrial proteins are presented as means of 2 independent experiments.

| Accession | Description                                                                                       | Entre z Gene ID | Gene ID                | Biological Process                                                                            | Cellular Component                     | Molecular Function                                                   | emPAI WT | emPAI <i>ups2</i> | Ratio <i>ups2</i> / WT |
|-----------|---------------------------------------------------------------------------------------------------|-----------------|------------------------|-----------------------------------------------------------------------------------------------|----------------------------------------|----------------------------------------------------------------------|----------|-------------------|------------------------|
| P37267    | Assembly factor cbp4 [OS=Saccharomyces cerevisiae S288c]                                          |                 | CBP4                   | cell organization and biogenesis                                                              | membrane;mitochondrion                 |                                                                      | 7.111    | 0.233             | 0.03                   |
| P81449    | ATP synthase subunit e, mitochondrial [OS=Saccharomyces cerevisiae S288c]                         | 851922          | TIM11; YDR322C-A       | cell organization and biogenesis;metabolic process;transport                                  | membrane;mitochondrion                 | catalytic activity;structural molecule activity;transporter activity | 9        | 0.334             | 0.04                   |
| P07253    | cytochrome B pre-mRNA-processing protein 6 [OS=Saccharomyces cerevisiae S288c]                    | 852417          | CBP6; YBR120C          | cell organization and biogenesis;metabolic process;regulation of biological process           | mitochondrion;ribosome                 |                                                                      | 4.179    | 0.179             | 0.04                   |
| P19955    | 37S ribosomal protein YMR-31, mitochondrial [OS=Saccharomyces cerevisiae S288c]                   | 850610          | YMR31; YFR049W         | cell organization and biogenesis;metabolic process                                            | mitochondrion;ribosome                 | catalytic activity;protein binding;structural molecule activity      | 26.826   | 1.154             | 0.04                   |
| P00128    | Cytochrome b-c1 complex subunit 7 [OS=Saccharomyces cerevisiae S288c]                             | 852142          | QCR7; YDR529C          | cell organization and biogenesis;metabolic process;transport                                  | membrane;mitochondrion                 | catalytic activity;transporter activity                              | 34.938   | 1.783             | 0.05                   |
| P32799    | Cytochrome c oxidase subunit 6A, mitochondrial [OS=Saccharomyces cerevisiae S288c]                | 852684          | COX13; YGL191W         | cell organization and biogenesis;metabolic process;regulation of biological process;transport | membrane;mitochondrion                 | catalytic activity;enzyme regulator activity;transporter activity    | 18.953   | 0.995             | 0.05                   |
| P43594    | MICOS complex subunit MIC19 [OS=Saccharomyces cerevisiae S288c]                                   | 850563          | AIM13; MIC19; YFR011C  | cell organization and biogenesis                                                              | cytoplasm;membrane;mitochondrion       |                                                                      | 4.337    | 0.233             | 0.05                   |
| Q12165    | ATP synthase subunit delta, mitochondrial [OS=Saccharomyces cerevisiae S288c]                     | 851560          | ATP16; YDL004W         | metabolic process;transport                                                                   | membrane;mitochondrion                 | catalytic activity;transporter activity                              | 4.623    | 0.334             | 0.07                   |
| P38885    | Altered inheritance of mitochondria protein 46, mitochondrial [OS=Saccharomyces cerevisiae S288c] | 856606          | AIM46; YHR199C         |                                                                                               | mitochondrion                          | catalytic activity                                                   | 2.728    | 0.245             | 0.09                   |
| P40165    | NAD(P)H-hydrate epimerase [OS=Saccharomyces cerevisiae S288c]                                     | 855521          | YNL200C; YNL200C       | metabolic process                                                                             | cytoplasm;mitochondrion                | catalytic activity;metal ion binding;nucleotide binding              | 2.162    | 0.212             | 0.10                   |
| P04037    | cytochrome c oxidase subunit 4, mitochondrial [OS=Saccharomyces cerevisiae S288c]                 | 852688          | COX4; YGL187C          | cell organization and biogenesis;metabolic process;transport                                  | membrane;mitochondrion                 | catalytic activity;metal ion binding;transporter activity            | 42.288   | 4.337             | 0.10                   |
| P35736    | Uncharacterized protein YKL050C [OS=Saccharomyces cerevisiae S288c]                               | 853816          | YKL050C; YKL050C       | cell organization and biogenesis                                                              | membrane                               |                                                                      | 0.374    | 0.04              | 0.11                   |
| P00427    | Cytochrome c oxidase subunit 6, mitochondrial [OS=Saccharomyces cerevisiae S288c]                 | 856448          | COX6; YHR051W          | metabolic process;transport                                                                   | membrane;mitochondrion                 | catalytic activity;metal ion binding;transporter activity            | 7.254    | 0.778             | 0.11                   |
| P36141    | Putative redox protein fmp46, mitochondrial [OS=Saccharomyces cerevisiae S288c]                   | 853923          | FMP46; YKR049C         | metabolic process                                                                             | mitochondrion                          | catalytic activity;protein binding                                   | 4.337    | 0.52              | 0.12                   |
| Q96VH5    | MICOS complex subunit Mic10 [OS=Saccharomyces cerevisiae S288c]                                   | 850300          | MOS1; MIC10; YCL057C-A | cell organization and biogenesis                                                              | membrane;mitochondrion                 |                                                                      | 6.197    | 0.931             | 0.15                   |
| P00175    | Cytochrome b2, mitochondrial [OS=Saccharomyces cerevisiae S288c]                                  | 854950          | CYB2; YML054C          | metabolic process;transport                                                                   | cytosol;membrane;mitochondrion;nucleus | catalytic activity;metal ion binding;nucleotide binding              | 1.239    | 0.189             | 0.15                   |
| P38341    | MICOS complex subunit MIC12 [OS=Saccharomyces cerevisiae S288c]                                   | 852566          | AIM5; MIC12; YBR262C   | cell organization and biogenesis                                                              | membrane;mitochondrion                 |                                                                      | 1.783    | 0.292             | 0.16                   |

|        |                                                                                                           |        |                         |                                                                                                        |                                        |                                                               |        |        |      |
|--------|-----------------------------------------------------------------------------------------------------------|--------|-------------------------|--------------------------------------------------------------------------------------------------------|----------------------------------------|---------------------------------------------------------------|--------|--------|------|
| Q05892 | MIOREX complex component 2 [OS=Saccharomyces cerevisiae S288c]                                            | 850997 | YLR290C; COQ11; YLR290C | metabolic process                                                                                      | mitochondrion                          | catalytic activity                                            | 3.217  | 0.54   | 0.17 |
| P40502 | Altered inheritance of mitochondria protein 19, mitochondrial [OS=Saccharomyces cerevisiae S288c]         | 854722 | AIM19; YIL087C          |                                                                                                        | membrane;mitochondrion                 |                                                               | 1.512  | 0.259  | 0.17 |
| P39525 | 3-oxoacyl-[acyl-carrier-protein] synthase homolog [OS=Saccharomyces cerevisiae S288c]                     | 856790 | CEM1; YER061C           | metabolic process                                                                                      | mitochondrion                          | catalytic activity                                            | 2.899  | 0.52   | 0.18 |
| P22353 | 54S ribosomal protein L8, mitochondrial [OS=Saccharomyces cerevisiae S288c]                               | 853382 | MRPL8; YJL063C          | cell organization and biogenesis;metabolic process                                                     | mitochondrion;ribosome                 | structural molecule activity                                  | 0.848  | 0.166  | 0.20 |
| P08525 | Cytochrome b-c1 complex subunit 8 [OS=Saccharomyces cerevisiae S288c]                                     | 853273 | QCR8; YJL166W           | metabolic process;transport                                                                            | membrane;mitochondrion                 | catalytic activity;transporter activity                       | 2.981  | 0.585  | 0.20 |
| P02992 | elongation factor Tu, mitochondrial [OS=Saccharomyces cerevisiae S288c]                                   | 854359 | TUF1; YOR187W           | cell organization and biogenesis;metabolic process                                                     | mitochondrion                          | catalytic activity;nucleotide binding;RNA binding             | 30.623 | 6.017  | 0.20 |
| P08067 | cytochrome b-c1 complex subunit Rieske, mitochondrial [OS=Saccharomyces cerevisiae S288c]                 | 856689 | RIP1; YEL024W           | metabolic process;transport                                                                            | membrane;mitochondrion                 | catalytic activity;metal ion binding;transporter activity     | 55.234 | 11.115 | 0.20 |
| P38523 | GrpE protein homolog, mitochondrial [OS=Saccharomyces cerevisiae S288c]                                   | 854407 | MGE1; YOR232W           | metabolic process;regulation of biological process;transport                                           | membrane;mitochondrion;organelle lumen | enzyme regulator activity;nucleotide binding;protein binding  | 1.336  | 0.274  | 0.21 |
| P00424 | Cytochrome c oxidase polypeptide 5A, mitochondrial [OS=Saccharomyces cerevisiae S288c]                    | 855675 | COX5A; YNL052W          | metabolic process;transport                                                                            | membrane;mitochondrion                 | catalytic activity;transporter activity                       | 2.511  | 0.52   | 0.21 |
| P25372 | Thioredoxin-3, mitochondrial [OS=Saccharomyces cerevisiae S288c]                                          | 850444 | TRX3; YCR083W           | cellular homeostasis;metabolic process;regulation of biological process;response to stimulus;transport | cytoplasm;mitochondrion                | catalytic activity                                            | 2.511  | 0.52   | 0.21 |
| Q04689 | Altered inheritance of mitochondria protein 32 [OS=Saccharomyces cerevisiae S288c]                        | 854955 | AIM32; YML050W          |                                                                                                        |                                        |                                                               | 0.52   | 0.11   | 0.21 |
| P53305 | Mitochondrial 37S ribosomal protein S27 [OS=Saccharomyces cerevisiae S288c]                               | 853129 | RSM27; YGR215W          | cell organization and biogenesis;metabolic process                                                     | mitochondrion;ribosome                 | structural molecule activity                                  | 2.162  | 0.468  | 0.22 |
| Q08970 | Mitochondrial metal transporter 2 [OS=Saccharomyces cerevisiae S288c]                                     | 855877 | MMT2; YPL224C           | cellular homeostasis;regulation of biological process;response to stimulus;transport                   | membrane;mitochondrion                 | transporter activity                                          | 0.407  | 0.089  | 0.22 |
| Q02608 | 37S ribosomal protein S16, mitochondrial [OS=Saccharomyces cerevisiae S288c]                              | 856094 | MRPS16; YPL013C         | cell organization and biogenesis;metabolic process                                                     | mitochondrion;ribosome                 | structural molecule activity                                  | 1.683  | 0.389  | 0.23 |
| P10834 | protein PET54 [OS=Saccharomyces cerevisiae S288c]                                                         | 853137 | PET54; YGR222W          | metabolic process;regulation of biological process                                                     | membrane;mitochondrion;organelle lumen | nucleotide binding;RNA binding;translation regulator activity | 1.565  | 0.369  | 0.24 |
| Q07500 | External NADH-ubiquinone oxidoreductase 2, mitochondrial [OS=Saccharomyces cerevisiae S288c]              | 851474 | NDE2; YDL085W           | metabolic process                                                                                      | mitochondrion                          | catalytic activity;nucleotide binding                         | 13.678 | 3.299  | 0.24 |
| Q06236 | Mitochondrial inner membrane protein SHH4 [OS=Saccharomyces cerevisiae S288c]                             | 850861 | SHH4; YLR164W           | metabolic process                                                                                      | membrane;mitochondrion                 | catalytic activity;metal ion binding                          | 3.217  | 0.778  | 0.24 |
| P00127 | Cytochrome b-c1 complex subunit 6 [OS=Saccharomyces cerevisiae S288c]                                     | 850593 | QCR6; YFR033C           | metabolic process;transport                                                                            | membrane;mitochondrion                 | catalytic activity;transporter activity                       | 1.371  | 0.334  | 0.24 |
| Q12428 | Probable 2-methylcitrate dehydratase [OS=Saccharomyces cerevisiae S288c]                                  | 856108 | PDH1; YPR002W           | metabolic process                                                                                      | cytoplasm;membrane;mitochondrion       | catalytic activity                                            | 18.11  | 4.623  | 0.26 |
| P48569 | Uncharacterized protein YDL183C [OS=Saccharomyces cerevisiae S288c]                                       | 851345 | YDL183C; YDL183C        | transport                                                                                              | mitochondrion                          |                                                               | 1.069  | 0.274  | 0.26 |
| P19516 | Cytochrome c oxidase assembly protein COX11, mitochondrial [OS=Saccharomyces cerevisiae S288c]            | 855971 | COX11; YPL132W          | cell organization and biogenesis;metabolic process                                                     | membrane;mitochondrion;ribosome        | metal ion binding                                             | 1.069  | 0.274  | 0.26 |
| P25573 | Mitochondrial inner membrane i-AAA protease supercomplex subunit MGR1 [OS=Saccharomyces cerevisiae S288c] | 850313 | MGR1; YCL044C           | metabolic process                                                                                      | membrane;mitochondrion                 | protein binding                                               | 1.649  | 0.425  | 0.26 |
| P53219 | Abhydrolase domain-containing protein IMO32 [OS=Saccharomyces cerevisiae S288c]                           | 852919 | IMO32; YGR031W          | metabolic process;transport                                                                            | mitochondrion                          | catalytic activity                                            | 0.931  | 0.245  | 0.26 |

|        |                                                                                                           |        |                  |                                                                                                                               |                                         |                                                                           |        |        |      |
|--------|-----------------------------------------------------------------------------------------------------------|--------|------------------|-------------------------------------------------------------------------------------------------------------------------------|-----------------------------------------|---------------------------------------------------------------------------|--------|--------|------|
| Q03798 | Altered inheritance of mitochondria protein 36, mitochondrial [OS=Saccharomyces cerevisiae S288c]         | 855189 | AIM36; YMR157C   |                                                                                                                               | membrane;mitochondrion                  |                                                                           | 1.637  | 0.438  | 0.27 |
| P53326 | Uncharacterized protein YGR266W [OS=Saccharomyces cerevisiae S288c]                                       | 853182 | YGR266W; YGR266W |                                                                                                                               | membrane;mitochondrion                  |                                                                           | 1.081  | 0.299  | 0.28 |
| Q03201 | 37S ribosomal protein S10, mitochondrial [OS=Saccharomyces cerevisiae S288c]                              | 851611 | RSM10; YDR041W   | cell organization and biogenesis;metabolic process                                                                            | mitochondrion;ribosome                  | structural molecule activity                                              | 0.701  | 0.194  | 0.28 |
| P38175 | 37S ribosomal protein MRP21, mitochondrial [OS=Saccharomyces cerevisiae S288c]                            | 852188 | MRP21; YBL090W   | cell organization and biogenesis;metabolic process                                                                            | mitochondrion;ribosome                  | structural molecule activity                                              | 0.701  | 0.194  | 0.28 |
| P00445 | Superoxide dismutase [Cu-Zn] [OS=Saccharomyces cerevisiae S288c]                                          | 853568 | SOD1; YJR104C    | cell organization and biogenesis;cellular homeostasis;metabolic process;regulation of biological process;response to stimulus | cytoplasm;cytosol;mitochondrion         | antioxidant activity;catalytic activity;metal ion binding;protein binding | 1.848  | 0.52   | 0.28 |
| Q06892 | NADH kinase POS5, mitochondrial [OS=Saccharomyces cerevisiae S288c]                                       | 855913 | POS5; YPL188W    | metabolic process;response to stimulus                                                                                        | mitochondrion;organelle lumen           | catalytic activity;nucleotide binding                                     | 1.31   | 0.369  | 0.28 |
| P25719 | Peptidyl-prolyl cis-trans isomerase C, mitochondrial [OS=Saccharomyces cerevisiae S288c]                  | 854897 | CPR3; YML078W    | cell death;metabolic process                                                                                                  | mitochondrion;organelle lumen           | catalytic activity                                                        | 2.981  | 0.848  | 0.28 |
| P43567 | alanine-glyoxylate aminotransferase 1 [OS=Saccharomyces cerevisiae S288c]                                 | 850514 | AGX1; YFL030W    | metabolic process                                                                                                             | cytosol;mitochondrion                   | catalytic activity                                                        | 2.162  | 0.616  | 0.28 |
| Q04935 | Cytochrome c oxidase protein 20, mitochondrial [OS=Saccharomyces cerevisiae S288c]                        | 851817 | COX20; YDR231C   | cell organization and biogenesis;metabolic process                                                                            | membrane;mitochondrion                  | protein binding                                                           | 2.455  | 0.701  | 0.29 |
| P14693 | sorting assembly machinery 35 kDa subunit [OS=Saccharomyces cerevisiae S288c]                             | 856483 | SAM35; YHR083W   | cell organization and biogenesis;transport                                                                                    | membrane;mitochondrion                  | protein binding                                                           | 0.54   | 0.155  | 0.29 |
| P42847 | 37S ribosomal protein S18, mitochondrial [OS=Saccharomyces cerevisiae S288c]                              | 855410 | MRPS18; YNL306W  | cell organization and biogenesis;metabolic process                                                                            | mitochondrion;ribosome                  | RNA binding;structural molecule activity                                  | 0.54   | 0.155  | 0.29 |
| Q04472 | Mitochondrial inner membrane i-AAA protease supercomplex subunit MGR3 [OS=Saccharomyces cerevisiae S288c] | 855142 | MGR3; YMR115W    | metabolic process                                                                                                             | membrane;mitochondrion                  | protein binding                                                           | 0.52   | 0.15   | 0.29 |
| P25605 | Acetolactate synthase small subunit, mitochondrial [OS=Saccharomyces cerevisiae S288c]                    | 850348 | ILV6; YCL009C    | metabolic process;regulation of biological process                                                                            | mitochondrion                           | catalytic activity;enzyme regulator activity                              | 6.848  | 1.976  | 0.29 |
| P00401 | Cytochrome c oxidase subunit 1 [OS=Saccharomyces cerevisiae S288c]                                        | 854598 | COX1; Q0045      | metabolic process;transport                                                                                                   | membrane;mitochondrion                  | catalytic activity;metal ion binding;transporter activity                 | 1.61   | 0.468  | 0.29 |
| P00927 | Threonine dehydratase, mitochondrial [OS=Saccharomyces cerevisiae S288c]                                  | 856819 | ILV1; YER086W    | metabolic process                                                                                                             | cytoplasm;mitochondrion                 | catalytic activity                                                        | 3.125  | 0.914  | 0.29 |
| Q06678 | 54S ribosomal protein L35, mitochondrial [OS=Saccharomyces cerevisiae S288c]                              | 851921 | MRPL35; YDR322W  | cell organization and biogenesis;metabolic process                                                                            | mitochondrion;ribosome                  | structural molecule activity                                              | 1.031  | 0.304  | 0.29 |
| P38122 | 3-methyl-2-oxobutanoate hydroxymethyltransferase [OS=Saccharomyces cerevisiae S288c]                      | 852474 | ECM31; YBR176W   | metabolic process                                                                                                             | mitochondrion                           | catalytic activity                                                        | 0.413  | 0.122  | 0.30 |
| P21954 | Isocitrate dehydrogenase [NADP], mitochondrial [OS=Saccharomyces cerevisiae S288c]                        | 851493 | IDP1; YDL066W    | metabolic process                                                                                                             | mitochondrion                           | catalytic activity;metal ion binding;nucleotide binding;protein binding   | 38.811 | 11.589 | 0.30 |
| P38120 | 37S ribosomal protein S9, mitochondrial [OS=Saccharomyces cerevisiae S288c]                               | 852443 | MRPS9; YBR146W   | cell organization and biogenesis;metabolic process                                                                            | mitochondrion;ribosome                  | RNA binding;structural molecule activity                                  | 2.384  | 0.719  | 0.30 |
| Q01217 | Protein ARG5,6, mitochondrial [OS=Saccharomyces cerevisiae S288c]                                         | 856800 | ARG5,6; YER069W  | metabolic process;regulation of biological process                                                                            | cytoplasm;mitochondrion;organelle lumen | catalytic activity;nucleotide binding;protein binding                     | 0.286  | 0.087  | 0.30 |
| Q03246 | 37S ribosomal protein S17, mitochondrial [OS=Saccharomyces cerevisiae S288c]                              | 855226 | MRPS17; YMR188C  | cell differentiation;cell organization and biogenesis;metabolic process                                                       | mitochondrion;ribosome                  | RNA binding;structural molecule                                           | 1.276  | 0.389  | 0.30 |

|        |                                                                                                                    |        |                  |                                                                                      |                                              |                                                                                        |        |        |      |
|--------|--------------------------------------------------------------------------------------------------------------------|--------|------------------|--------------------------------------------------------------------------------------|----------------------------------------------|----------------------------------------------------------------------------------------|--------|--------|------|
|        | S288c]                                                                                                             |        |                  |                                                                                      |                                              | activity                                                                               |        |        |      |
| P22354 | 54S ribosomal protein L20, mitochondrial [OS=Saccharomyces cerevisiae S288c]                                       | 853960 | MRPL20; YKR085C  | cell organization and biogenesis;metabolic process                                   | mitochondrion;ribosome                       | structural molecule activity                                                           | 1.276  | 0.389  | 0.30 |
| P09950 | 5-aminolevulinate synthase, mitochondrial [OS=Saccharomyces cerevisiae S288c]                                      | 851818 | HEM1; YDR232W    | metabolic process                                                                    | mitochondrion;organelle lumen                | catalytic activity                                                                     | 0.28   | 0.086  | 0.31 |
| P00830 | ATP synthase subunit beta, mitochondrial [OS=Saccharomyces cerevisiae S288c]                                       | 853585 | ATP2; YJR121W    | metabolic process;transport                                                          | cytosol;membrane;mitochondrion               | catalytic activity;nucleotide binding;protein binding;transporter activity             | 78.433 | 24.119 | 0.31 |
| P07236 | Threonine--tRNA ligase, mitochondrial [OS=Saccharomyces cerevisiae S288c]                                          | 853640 | MST1; YKL194C    | metabolic process                                                                    | cytoplasm;mitochondrion;organelle lumen      | catalytic activity;nucleotide binding;RNA binding                                      | 0.233  | 0.072  | 0.31 |
| P32445 | Single-stranded DNA-binding protein RIM1, mitochondrial [OS=Saccharomyces cerevisiae S288c]                        | 850395 | RIM1; YCR028C-A  | cell organization and biogenesis;metabolic process;regulation of biological process  | mitochondrion                                | DNA binding                                                                            | 3.642  | 1.154  | 0.32 |
| P37298 | Succinate dehydrogenase [ubiquinone] cytochrome b small subunit, mitochondrial [OS=Saccharomyces cerevisiae S288c] | 851758 | SDH4; YDR178W    | metabolic process;transport                                                          | membrane;mitochondrion                       | catalytic activity;metal ion binding                                                   | 3.642  | 1.154  | 0.32 |
| P81451 | ATP synthase subunit K, mitochondrial [OS=Saccharomyces cerevisiae S288c]                                          | 854077 | ATP19; YOL077W-A | cell organization and biogenesis;metabolic process;transport                         | membrane;mitochondrion                       | catalytic activity;transporter activity                                                | 3.642  | 1.154  | 0.32 |
| P32387 | 54S ribosomal protein L41, mitochondrial [OS=Saccharomyces cerevisiae S288c]                                       | 852014 | MRP20; YDR405W   | cell organization and biogenesis;metabolic process                                   | mitochondrion;ribosome                       | nucleotide binding;protein binding;RNA binding;structural molecule activity            | 1.581  | 0.501  | 0.32 |
| Q99297 | Mitochondrial 2-oxodicarboxylate carrier 2 [OS=Saccharomyces cerevisiae S288c]                                     | 854397 | ODC2; YOR222W    | metabolic process;transport                                                          | membrane;mitochondrion                       | structural molecule activity;transporter activity                                      | 1.054  | 0.334  | 0.32 |
| P23833 | Protein SCO1, mitochondrial [OS=Saccharomyces cerevisiae S288c]                                                    | 852325 | SCO1; YBR037C    | cell organization and biogenesis;cellular homeostasis;response to stimulus;transport | membrane;mitochondrion                       | antioxidant activity;catalytic activity;metal ion binding                              | 1.448  | 0.468  | 0.32 |
| Q12283 | Malonyl CoA-acyl carrier protein transacylase, mitochondrial [OS=Saccharomyces cerevisiae S288c]                   | 854396 | MCT1; YOR221C    | metabolic process                                                                    | mitochondrion                                | catalytic activity                                                                     | 0.896  | 0.292  | 0.33 |
| P40008 | Protein FMP52, mitochondrial [OS=Saccharomyces cerevisiae S288c]                                                   | 856721 | FMP52; YER004W   |                                                                                      | endoplasmic reticulum;membrane;mitochondrion | catalytic activity                                                                     | 3.217  | 1.054  | 0.33 |
| P39522 | Dihydroxy-acid dehydratase, mitochondrial [OS=Saccharomyces cerevisiae S288c]                                      | 853473 | ILV3; YJR016C    | metabolic process                                                                    | mitochondrion                                | catalytic activity;metal ion binding                                                   | 29.539 | 9.723  | 0.33 |
| P12686 | 37S ribosomal protein MRP13, mitochondrial [OS=Saccharomyces cerevisiae S288c]                                     | 852975 | MRP13; YGR084C   | cell organization and biogenesis;metabolic process                                   | mitochondrion;ribosome                       | structural molecule activity                                                           | 1.239  | 0.413  | 0.33 |
| P10662 | 37S ribosomal protein MRP1, mitochondrial [OS=Saccharomyces cerevisiae S288c]                                      | 851948 | MRP1; YDR347W    | cell organization and biogenesis;metabolic process;response to stimulus              | mitochondrion;ribosome                       | antioxidant activity;catalytic activity;metal ion binding;structural molecule activity | 2.981  | 0.995  | 0.33 |
| P02381 | Ribosomal protein VAR1, mitochondrial [OS=Saccharomyces cerevisiae S288c]                                          | 854586 | VAR1; QO140      | cell organization and biogenesis;metabolic process                                   | mitochondrion;ribosome                       | structural molecule activity                                                           | 0.688  | 0.233  | 0.34 |
| P11325 | Leucine--tRNA ligase, mitochondrial [OS=Saccharomyces cerevisiae S288c]                                            | 851098 | NAM2; YLR382C    | cell organization and biogenesis;metabolic process;regulation of biological process  | cytosol;mitochondrion;organelle lumen        | catalytic activity;nucleotide binding;RNA binding                                      | 0.353  | 0.12   | 0.34 |
| P25349 | Flavoprotein-like protein YCP4 [OS=Saccharomyces cerevisiae S288c]                                                 | 850360 | YCP4; YCR004C    | metabolic process;regulation of biological process                                   | cytoplasm;membrane;mitochondrion             | catalytic activity;nucleotide binding;protein binding                                  | 9      | 3.084  | 0.34 |
| P40961 | prohibitin-1 [OS=Saccharomyces cerevisiae S288c]                                                                   | 853033 | PHB1; YGR132C    | cell organization and biogenesis;metabolic process;regulation of biological process  | membrane;mitochondrion                       | protein binding                                                                        | 6.848  | 2.36   | 0.34 |
| P00410 | Cytochrome c oxidase subunit 2 [OS=Saccharomyces cerevisiae S288c]                                                 | 854622 | COX2; QO250      | metabolic process;transport                                                          | membrane;mitochondrion                       | catalytic activity;metal ion binding;protei                                            | 4.623  | 1.61   | 0.35 |

|        |                                                                                                                |         |                      |                                                                                                                               |                                                 |                                                                           |        |       |      |
|--------|----------------------------------------------------------------------------------------------------------------|---------|----------------------|-------------------------------------------------------------------------------------------------------------------------------|-------------------------------------------------|---------------------------------------------------------------------------|--------|-------|------|
|        |                                                                                                                |         |                      |                                                                                                                               |                                                 | n binding;transporter activity                                            |        |       |      |
| Q02883 | N-acyl-phosphatidylethanolamine-hydrolyzing phospholipase D, mitochondrial [OS=Saccharomyces cerevisiae S288c] | 856001  | FMP30; YPL103C       | metabolic process                                                                                                             | membrane;mitochondrion                          | catalytic activity;metal ion binding                                      | 0.557  | 0.194 | 0.35 |
| P32860 | NifU-like protein, mitochondrial [OS=Saccharomyces cerevisiae S288c]                                           | 853826  | NFU1; YKL040C        | cell organization and biogenesis;cellular homeostasis;metabolic process                                                       | mitochondrion;organelle lumen                   | metal ion binding                                                         | 3.87   | 1.371 | 0.35 |
| P18900 | hexaprenyl pyrophosphate synthase, mitochondrial [OS=Saccharomyces cerevisiae S288c]                           | 852288  | COQ1; YBR003W        | metabolic process                                                                                                             | membrane;mitochondrion                          | catalytic activity;metal ion binding;protein binding                      | 0.468  | 0.166 | 0.35 |
| P39726 | Glycine cleavage system H protein, mitochondrial [OS=Saccharomyces cerevisiae S288c]                           | 851254  | GCV3; YAL044C        | metabolic process                                                                                                             | mitochondrion                                   | catalytic activity                                                        | 4.995  | 1.783 | 0.36 |
| P00044 | Cytochrome c iso-1 [OS=Saccharomyces cerevisiae S288c]                                                         | 853507  | CYC1; YJR048W        | metabolic process;transport                                                                                                   | mitochondrion                                   | metal ion binding;protein binding                                         | 9      | 3.217 | 0.36 |
| P49367 | Homoaconitase, mitochondrial [OS=Saccharomyces cerevisiae S288c]                                               | 851820  | LYS4; YDR234W        | metabolic process                                                                                                             | mitochondrion                                   | catalytic activity;metal ion binding;protein binding                      | 1.54   | 0.551 | 0.36 |
| P21306 | ATP synthase subunit epsilon, mitochondrial [OS=Saccharomyces cerevisiae S288c]                                | 855857  | ATP15; YPL271W       | metabolic process;transport                                                                                                   | membrane;mitochondrion                          | catalytic activity;transporter activity                                   | 2.162  | 0.778 | 0.36 |
| P53170 | [Pyruvate dehydrogenase (acetyl-transferring)] kinase 2, mitochondrial [OS=Saccharomyces cerevisiae S288c]     | 852821  | PKP2; YGL059W        | metabolic process;regulation of biological process                                                                            | mitochondrion;organelle lumen                   | catalytic activity;nucleotide binding;protein binding                     | 0.778  | 0.28  | 0.36 |
| Q3E824 | Uncharacterized protein YOR020W-A [OS=Saccharomyces cerevisiae S288c]                                          | 1466480 | YOR020W-A; YOR020W-A | metabolic process;transport                                                                                                   | membrane;mitochondrion                          |                                                                           | 5.813  | 2.162 | 0.37 |
| Q02784 | Monothiol glutaredoxin-5, mitochondrial [OS=Saccharomyces cerevisiae S288c]                                    | 856048  | GRX5; YPL059W        | cell organization and biogenesis;cellular homeostasis;metabolic process;regulation of biological process;response to stimulus | mitochondrion;organelle lumen                   | catalytic activity;metal ion binding                                      | 1.783  | 0.668 | 0.37 |
| Q6Q560 | Protein isd11 [OS=Saccharomyces cerevisiae S288c]                                                              | 856774  | ISD11; YER048W-A     | cell organization and biogenesis;metabolic process                                                                            | mitochondrion;organelle lumen                   | catalytic activity;protein binding                                        | 1.783  | 0.668 | 0.37 |
| P08417 | fumarate hydratase, mitochondrial [OS=Saccharomyces cerevisiae S288c]                                          | 855866  | FUM1; YPL262W        | cell organization and biogenesis;metabolic process                                                                            | cytoplasm;cytosol;mitochondrion;organelle lumen | catalytic activity                                                        | 13.874 | 5.21  | 0.38 |
| P25374 | Cysteine desulfurase, mitochondrial [OS=Saccharomyces cerevisiae S288c]                                        | 850343  | NFS1; YCL017C        | cell organization and biogenesis;cellular homeostasis;metabolic process                                                       | mitochondrion;nucleus                           | catalytic activity;metal ion binding;protein binding                      | 2.594  | 0.978 | 0.38 |
| Q12298 | uncharacterized ABC transporter ATP-binding protein YDR061W [OS=Saccharomyces cerevisiae S288c]                | 851633  | YDR061W; YDR061W     |                                                                                                                               | mitochondrion                                   | catalytic activity;nucleotide binding                                     | 0.512  | 0.194 | 0.38 |
| P32891 | D-lactate dehydrogenase [cytochrome] 1, mitochondrial [OS=Saccharomyces cerevisiae S288c]                      | 851380  | DLD1; YDL174C        | metabolic process;transport                                                                                                   | membrane;mitochondrion                          | catalytic activity;nucleotide binding                                     | 18.684 | 7.161 | 0.38 |
| P33416 | Heat shock protein 78, mitochondrial [OS=Saccharomyces cerevisiae S288c]                                       | 851845  | HSP78; YDR258C       | cell organization and biogenesis;metabolic process;regulation of biological process;response to stimulus                      | mitochondrion;organelle lumen                   | catalytic activity;nucleotide binding;protein binding                     | 7.929  | 3.042 | 0.38 |
| P36525 | 54S ribosomal protein L24, mitochondrial [OS=Saccharomyces cerevisiae S288c]                                   | 855231  | MRPL24; YMR193W      | cell organization and biogenesis;metabolic process                                                                            | mitochondrion;ribosome                          | RNA binding;structural molecule activity                                  | 1.512  | 0.585 | 0.39 |
| P54003 | Protein SUR7 [OS=Saccharomyces cerevisiae S288c]                                                               | 854953  | SUR7; YML052W        | cell differentiation;transport                                                                                                | membrane;mitochondrion                          |                                                                           | 1.512  | 0.585 | 0.39 |
| P00431 | cytochrome c peroxidase, mitochondrial [OS=Saccharomyces cerevisiae S288c]                                     | 853940  | CCP1; YKR066C        | metabolic process;response to stimulus                                                                                        | mitochondrion;organelle lumen                   | antioxidant activity;catalytic activity;metal ion binding;protein binding | 1.424  | 0.557 | 0.39 |
| P21560 | Protein CBP3, mitochondrial [OS=Saccharomyces cerevisiae S288c]                                                | 855886  | CBP3; YPL215W        | cell organization and biogenesis;regulation of biological process                                                             | membrane;mitochondrion;ribosome                 |                                                                           | 1.424  | 0.557 | 0.39 |
| P37293 | N-terminal acetyltransferase 2 [OS=Saccharomyces cerevisiae S288c]                                             | 853050  | NAT2; YGR147C        | metabolic process                                                                                                             | cytoplasm;mitochondrion                         | catalytic activity                                                        | 1.404  | 0.551 | 0.39 |



|          |                                                                                                                |        |                        |                                                                                   |                                                               |                                                                |        |       |      |
|----------|----------------------------------------------------------------------------------------------------------------|--------|------------------------|-----------------------------------------------------------------------------------|---------------------------------------------------------------|----------------------------------------------------------------|--------|-------|------|
| P40053   | Altered inheritance of mitochondria protein 9, mitochondrial [OS=Saccharomyces cerevisiae S288c]               | 856813 | AIM9; YER080W          |                                                                                   | mitochondrion                                                 |                                                                | 4.555  | 1.798 | 0.39 |
| P53163   | 54S ribosomal protein L12, mitochondrial [OS=Saccharomyces cerevisiae S288c]                                   | 852811 | MNP1; YGL068W          | cell organization and biogenesis;metabolic process                                | mitochondrion;ribosome                                        | RNA binding;structural molecule activity                       | 1.31   | 0.52  | 0.40 |
| P47052   | succinate dehydrogenase [ubiquinone] flavoprotein subunit 2, mitochondrial [OS=Saccharomyces cerevisiae S288c] | 853405 | YJL045W; YJL045W       | metabolic process;transport                                                       | membrane;mitochondrion                                        | catalytic activity;nucleotide binding                          | 4.712  | 1.88  | 0.40 |
| Q01574   | acetyl-coenzyme A synthetase 1 [OS=Saccharomyces cerevisiae S288c]                                             | 851245 | ACS1; YAL054C          | cell organization and biogenesis;metabolic process                                | cytoplasm;cytosol;endoplasmic reticulum;mitochondrion;nucleus | catalytic activity;nucleotide binding                          | 2.36   | 0.947 | 0.40 |
| P40185   | Protein mfm1, mitochondrial [OS=Saccharomyces cerevisiae S288c]                                                | 854760 | MMF1; YIL051C          | cell organization and biogenesis;metabolic process                                | mitochondrion;organelle lumen                                 |                                                                | 5.31   | 2.162 | 0.41 |
| P00447   | Superoxide dismutase [Mn], mitochondrial [OS=Saccharomyces cerevisiae S288c]                                   | 856399 | SOD2; YHR008C          | metabolic process;response to stimulus                                            | mitochondrion;organelle lumen                                 | antioxidant activity;catalytic activity;metal ion binding      | 6.017  | 2.455 | 0.41 |
| Q04599   | 54S ribosomal protein L1, mitochondrial [OS=Saccharomyces cerevisiae S288c]                                    | 851694 | MRPL1; YDR116C         | cell organization and biogenesis;metabolic process                                | mitochondrion;ribosome                                        | RNA binding;structural molecule activity                       | 1.069  | 0.438 | 0.41 |
| P36066   | Protein MRG3-like [OS=Saccharomyces cerevisiae S288c]                                                          | 853725 | YKL133C; YKL133C       | metabolic process                                                                 | membrane;mitochondrion                                        | protein binding                                                | 1.054  | 0.433 | 0.41 |
| P07246   | Alcohol dehydrogenase 3, mitochondrial [OS=Saccharomyces cerevisiae S288c]                                     | 855107 | ADH3; YMR083W          | metabolic process                                                                 | mitochondrion;organelle lumen                                 | catalytic activity;metal ion binding                           | 10.159 | 4.179 | 0.41 |
| P35180   | mitochondrial import receptor subunit Tom20 [OS=Saccharomyces cerevisiae S288c]                                | 852973 | TOM20; YGR082W         | cell organization and biogenesis;transport                                        | membrane;mitochondrion                                        | protein binding;transporter activity                           | 1.031  | 0.425 | 0.41 |
| Q03799   | 37S ribosomal protein S8, mitochondrial [OS=Saccharomyces cerevisiae S288c]                                    | 855190 | MRP58; YMR158W         | cell organization and biogenesis;metabolic process                                | mitochondrion;ribosome                                        | structural molecule activity                                   | 1.031  | 0.425 | 0.41 |
| P46367   | Potassium-activated aldehyde dehydrogenase, mitochondrial [OS=Saccharomyces cerevisiae S288c]                  | 854556 | ALD4; YOR374W          | metabolic process                                                                 | mitochondrion;organelle lumen                                 | catalytic activity                                             | 47.497 | 19.62 | 0.41 |
| P43617   | Uncharacterized mitochondrial carrier YFR045W [OS=Saccharomyces cerevisiae S288c]                              | 850606 | YFR045W; YFR045W       | metabolic process;transport                                                       | membrane;mitochondrion                                        | structural molecule activity;transporter activity              | 0.995  | 0.413 | 0.42 |
| P32796-1 | Carnitine O-acetyltransferase, mitochondrial [OS=Saccharomyces cerevisiae S288c]                               | 854965 | CAT2; YML042W          | metabolic process;transport                                                       | membrane;mitochondrion                                        | catalytic activity                                             | 13.816 | 5.749 | 0.42 |
| P36101   | tRNA threonylcarbamoyladenosine dehydratase 2 [OS=Saccharomyces cerevisiae S288c]                              | 853841 | TCD2; YKL027W; YKL027W | metabolic process                                                                 | cytosol;membrane;mitochondrion                                | catalytic activity;nucleotide binding                          | 0.778  | 0.334 | 0.43 |
| Q07914   | mitochondrial import inner membrane translocase subunit TIM14 [OS=Saccharomyces cerevisiae S288c]              | 850694 | PAM18; YLR008C         | regulation of biological process;transport                                        | membrane;mitochondrion                                        | enzyme regulator activity;protein binding;transporter activity | 0.778  | 0.334 | 0.43 |
| P05626   | ATP synthase subunit 4, mitochondrial [OS=Saccharomyces cerevisiae S288c]                                      | 856027 | ATP4; YPL078C          | cell organization and biogenesis;metabolic process;transport                      | membrane;mitochondrion                                        | catalytic activity;transporter activity                        | 4.995  | 2.162 | 0.43 |
| P40159   | Uncharacterized protein YNL208W [OS=Saccharomyces cerevisiae S288c]                                            | 855513 | YNL208W; YNL208W       |                                                                                   | membrane;mitochondrion;ribosome                               |                                                                | 0.668  | 0.292 | 0.44 |
| P36531   | 54S ribosomal protein L36, mitochondrial [OS=Saccharomyces cerevisiae S288c]                                   | 852419 | MRPL36; YBR122C        | cell organization and biogenesis;metabolic process                                | mitochondrion;ribosome                                        | structural molecule activity                                   | 0.668  | 0.292 | 0.44 |
| Q04458   | Fatty aldehyde dehydrogenase HFD1 [OS=Saccharomyces cerevisiae S288c]                                          | 855137 | HFD1; YMR110C          | metabolic process                                                                 | endoplasmic reticulum;endosome;membrane;mitochondrion         | catalytic activity                                             | 4.055  | 1.783 | 0.44 |
| P38325   | Mitochondrial outer membrane protein OM14 [OS=Saccharomyces cerevisiae S288c]                                  | 852531 | OM14; YBR230C          | transport                                                                         | membrane;mitochondrion                                        |                                                                | 6.197  | 2.728 | 0.44 |
| P32317   | Protein AFG1 [OS=Saccharomyces cerevisiae S288c]                                                               | 856658 | AFG1; YEL052W          | cell organization and biogenesis;metabolic process;response to stimulus;transport | membrane;mitochondrion                                        | catalytic activity;nucleotide binding                          | 1.326  | 0.585 | 0.44 |
| P53140   | Protein RMD9, mitochondrial [OS=Saccharomyces cerevisiae S288c]                                                | 852771 | RMD9; YGL107C          | cell differentiation;metabolic process;regulation of biological process           | membrane;mitochondrion                                        | RNA binding                                                    | 1.512  | 0.668 | 0.44 |

|        |                                                                                                            |        |                    |                                                                                                  |                                                 |                                                                   |        |        |      |
|--------|------------------------------------------------------------------------------------------------------------|--------|--------------------|--------------------------------------------------------------------------------------------------|-------------------------------------------------|-------------------------------------------------------------------|--------|--------|------|
| P40513 | Mitochondrial acidic protein MAM33 [OS=Saccharomyces cerevisiae S288c]                                     | 854740 | MAM33; YIL070C     | metabolic process;regulation of biological process                                               | mitochondrion;organelle lumen                   | translation regulator activity                                    | 3.642  | 1.61   | 0.44 |
| P40581 | peroxiredoxin HYR1 [OS=Saccharomyces cerevisiae S288c]                                                     | 854855 | HYR1; YIR037W      | metabolic process;response to stimulus                                                           | cytoplasm;cytosol;mitochondrion;organelle lumen | antioxidant activity;catalytic activity                           | 0.585  | 0.259  | 0.44 |
| P40530 | [Pyruvate dehydrogenase (acetyl-transferring)] kinase 1, mitochondrial [OS=Saccharomyces cerevisiae S288c] | 854769 | PKP1; YIL042C      | metabolic process                                                                                | mitochondrion;organelle lumen                   | catalytic activity;nucleotide binding;protein binding             | 0.551  | 0.245  | 0.44 |
| P40086 | Cytochrome c oxidase assembly protein cox15 [OS=Saccharomyces cerevisiae S288c]                            | 856884 | COX15; YER141W     | cell organization and biogenesis;metabolic process;transport                                     | membrane;mitochondrion                          | catalytic activity;transporter activity                           | 2.594  | 1.154  | 0.44 |
| P23641 | mitochondrial phosphate carrier protein [OS=Saccharomyces cerevisiae S288c]                                | 853540 | MIR1; YJR077C      | metabolic process;transport                                                                      | membrane;mitochondrion                          | protein binding;structural molecule activity;transporter activity | 30.623 | 13.678 | 0.45 |
| P10507 | mitochondrial-processing peptidase subunit beta [OS=Saccharomyces cerevisiae S288c]                        | 850860 | MAS1; YLR163C      | metabolic process;transport                                                                      | mitochondrion;organelle lumen                   | catalytic activity;metal ion binding;protein binding              | 1.371  | 0.616  | 0.45 |
| P53312 | Succinyl-CoA ligase [ADP-forming] subunit beta, mitochondrial [OS=Saccharomyces cerevisiae S288c]          | 853159 | LSC2; YGR244C      | metabolic process                                                                                | mitochondrion                                   | catalytic activity;nucleotide binding                             | 20.017 | 9      | 0.45 |
| P40858 | 54S ribosomal protein L49, mitochondrial [OS=Saccharomyces cerevisiae S288c]                               | 853349 | MRPL49; YJL096W    | cell organization and biogenesis;metabolic process                                               | mitochondrion;ribosome                          | RNA binding;structural molecule activity                          | 0.468  | 0.212  | 0.45 |
| P34224 | Uncharacterized protein YBL059W [OS=Saccharomyces cerevisiae S288c]                                        | 852221 | YBL059W ; YBL059W  |                                                                                                  | membrane;mitochondrion                          |                                                                   | 0.468  | 0.212  | 0.45 |
| Q03020 | iron sulfur cluster assembly protein 1, mitochondrial [OS=Saccharomyces cerevisiae S288c]                  | 855968 | ISU1; YPL135W      | cell organization and biogenesis;cellular homeostasis;metabolic process                          | cytoplasm;mitochondrion;organelle lumen         | catalytic activity;metal ion binding;protein binding              | 0.468  | 0.212  | 0.45 |
| P32839 | Mitochondrial chaperone BCS1 [OS=Saccharomyces cerevisiae S288c]                                           | 851981 | BCS1; YDR375C      | cell organization and biogenesis;metabolic process;response to stimulus;transport                | cytosol;membrane;mitochondrion                  | catalytic activity;nucleotide binding;transporter activity        | 0.425  | 0.194  | 0.46 |
| Q01976 | ADP-ribose pyrophosphatase [OS=Saccharomyces cerevisiae S288c]                                             | 852408 | YSA1; YBR111C      | metabolic process                                                                                | cytoplasm;mitochondrion;nucleus                 | catalytic activity;metal ion binding                              | 0.425  | 0.194  | 0.46 |
| P34222 | Peptidyl-tRNA hydrolase 2 [OS=Saccharomyces cerevisiae S288c]                                              | 852223 | PTH2; YBL057C      | regulation of biological process                                                                 | cytoplasm;cytosol;membrane;mitochondrion        | catalytic activity;protein binding                                | 0.425  | 0.194  | 0.46 |
| Q04487 | Mitochondrial inner membrane protein SHH3 [OS=Saccharomyces cerevisiae S288c]                              | 855145 | SHH3; YMR118C      | metabolic process                                                                                | membrane;mitochondrion                          | catalytic activity;metal ion binding                              | 0.425  | 0.194  | 0.46 |
| P36523 | 54S ribosomal protein L15, mitochondrial [OS=Saccharomyces cerevisiae S288c]                               | 851022 | MRPL15; YLR312W -A | cell organization and biogenesis;metabolic process                                               | mitochondrion;ribosome                          | catalytic activity;RNA binding;structural molecule activity       | 0.334  | 0.155  | 0.46 |
| P36519 | 54S ribosomal protein L7, mitochondrial [OS=Saccharomyces cerevisiae S288c]                                | 851823 | MRPL7; YDR237W     | cell organization and biogenesis;metabolic process                                               | mitochondrion;ribosome                          | RNA binding;structural molecule activity                          | 0.292  | 0.136  | 0.47 |
| Q05931 | Heat shock protein SSQ1, mitochondrial [OS=Saccharomyces cerevisiae S288c]                                 | 851084 | SSQ1; YLR369W      | cell organization and biogenesis;metabolic process                                               | mitochondrion;organelle lumen                   | nucleotide binding;protein binding                                | 0.884  | 0.413  | 0.47 |
| P00560 | Phosphoglycerate kinase [OS=Saccharomyces cerevisiae S288c]                                                | 850370 | PGK1; YCR012W      | metabolic process                                                                                | cytoplasm;membrane;mitochondrion                | catalytic activity;nucleotide binding                             | 6.356  | 2.981  | 0.47 |
| P40098 | uncharacterized mitochondrial membrane protein FMP10 [OS=Saccharomyces cerevisiae S288c]                   | 856931 | FMP10; YER182W     |                                                                                                  | membrane;mitochondrion                          |                                                                   | 5.952  | 2.793  | 0.47 |
| Q08968 | UPF0061 protein FMP40 [OS=Saccharomyces cerevisiae S288c]                                                  | 855879 | FMP40; YPL222W     |                                                                                                  | mitochondrion                                   | protein binding                                                   | 2.162  | 1.015  | 0.47 |
| P07143 | Cytochrome c1, heme protein, mitochondrial [OS=Saccharomyces cerevisiae S288c]                             | 854231 | CYT1; YOR065W      | metabolic process;transport                                                                      | cytosol;membrane;mitochondrion                  | metal ion binding                                                 | 23.245 | 10.938 | 0.47 |
| P39722 | Mitochondrial Rho GTPase 1 [OS=Saccharomyces cerevisiae S288c]                                             | 851249 | GEM1; YAL048C      | cell organization and biogenesis;regulation of biological process;response to stimulus;transport | membrane;mitochondrion                          | catalytic activity;metal ion binding;nucleotide binding           | 0.259  | 0.122  | 0.47 |
| P18496 | Mitochondrial ATPase complex subunit ATP10                                                                 | 851109 | ATP10; YLR393W     | cell organization and biogenesis                                                                 | cytoplasm;membrane;mitochondrion                | protein binding                                                   | 1.239  | 0.585  | 0.47 |

|        |                                                                                                              |        |                      |                                                                                     |                                                  |                                                                         |        |        |      |  |
|--------|--------------------------------------------------------------------------------------------------------------|--------|----------------------|-------------------------------------------------------------------------------------|--------------------------------------------------|-------------------------------------------------------------------------|--------|--------|------|--|
|        | [OS=Saccharomyces cerevisiae S288c]                                                                          |        |                      |                                                                                     |                                                  |                                                                         |        |        |      |  |
| P29704 | squalene synthase [OS=Saccharomyces cerevisiae S288c]                                                        | 856597 | ERG9; YHR190W        | metabolic process                                                                   | endoplasmic reticulum;membrane;mitochondrion     | catalytic activity                                                      | 0.222  | 0.105  | 0.47 |  |
| P43122 | tRNA N6-adenosine threonylcarbamoyltransferase, mitochondrial [OS=Saccharomyces cerevisiae S288c]            | 851454 | QRI7; YDL104C        | cell organization and biogenesis;metabolic process                                  | mitochondrion                                    | catalytic activity;metal ion binding                                    | 0.212  | 0.101  | 0.48 |  |
| P36046 | Mitochondrial intermembrane space import and assembly protein 40 [OS=Saccharomyces cerevisiae S288c]         | 853639 | MIA40; YKL195W       | cellular component movement;metabolic process;response to stimulus;transport        | membrane;mitochondrion                           | catalytic activity;protein binding;transporter activity                 | 3.262  | 1.555  | 0.48 |  |
| P38072 | Protein SCO2, mitochondrial [OS=Saccharomyces cerevisiae S288c]                                              | 852312 | SCO2; YBR024W        | cell organization and biogenesis;cellular homeostasis;metabolic process;transport   | membrane;mitochondrion                           | antioxidant activity;catalytic activity;metal ion binding               | 1.154  | 0.551  | 0.48 |  |
| P53311 | Mitochondrial pyruvate carrier 3 [OS=Saccharomyces cerevisiae S288c]                                         | 853158 | FMP43; MPC3; YGR243W | transport                                                                           | membrane;mitochondrion                           | transporter activity                                                    | 1.61   | 0.778  | 0.48 |  |
| Q08818 | Meiotic sister-chromatid recombination protein 6, mitochondrial [OS=Saccharomyces cerevisiae S288c]          | 854536 | MSC6; YOR354C        | metabolic process                                                                   | mitochondrion;organelle lumen                    | RNA binding                                                             | 1.047  | 0.506  | 0.48 |  |
| P39925 | Mitochondrial respiratory chain complexes assembly protein AFG3 [OS=Saccharomyces cerevisiae S288c]          | 856737 | AFG3; YER017C        | cell organization and biogenesis;metabolic process;response to stimulus;transport   | membrane;mitochondrion                           | catalytic activity;metal ion binding;nucleotide binding;protein binding | 1.342  | 0.65   | 0.48 |  |
| Q02486 | ARS-binding factor 2, mitochondrial [OS=Saccharomyces cerevisiae S288c]                                      | 855094 | ABF2; YMR072W        | cell organization and biogenesis;metabolic process;regulation of biological process | chromosome;mitochondrion                         | DNA binding                                                             | 69.17  | 33.551 | 0.49 |  |
| P25039 | Elongation factor G, mitochondrial [OS=Saccharomyces cerevisiae S288c]                                       | 850758 | MEF1; YLR069C        | cell organization and biogenesis;metabolic process                                  | cytosol;mitochondrion                            | catalytic activity;nucleotide binding;RNA binding                       | 0.931  | 0.456  | 0.49 |  |
| P32473 | Pyruvate dehydrogenase E1 component subunit beta, mitochondrial [OS=Saccharomyces cerevisiae S288c]          | 852522 | PDB1; YBR221C        | metabolic process                                                                   | mitochondrion;organelle lumen                    | catalytic activity                                                      | 9      | 4.456  | 0.50 |  |
| P32787 | Mitochondrial genome maintenance protein MGM101 [OS=Saccharomyces cerevisiae S288c]                          | 853609 | MGM101; YJR144W      | cell organization and biogenesis;metabolic process;response to stimulus             | chromosome;mitochondrion                         | DNA binding                                                             | 3.281  | 1.637  | 0.50 |  |
| P33421 | Succinate dehydrogenase [ubiquinone] cytochrome b subunit, mitochondrial [OS=Saccharomyces cerevisiae S288c] | 853716 | SDH3; YKL141W        | cell organization and biogenesis;metabolic process;transport                        | membrane;mitochondrion                           | catalytic activity;metal ion binding                                    | 1.276  | 0.638  | 0.50 |  |
| P32898 | Mitochondrial presequence protease [OS=Saccharomyces cerevisiae S288c]                                       | 852041 | CYM1; YDR430C        | metabolic process                                                                   | mitochondrion                                    | catalytic activity;metal ion binding                                    | 1.349  | 0.682  | 0.51 |  |
| P00358 | glyceraldehyde-3-phosphate dehydrogenase 2 [OS=Saccharomyces cerevisiae S288c]                               | 853465 | TDH2; YJR009C        | cell death;metabolic process                                                        | cytoplasm;cytosol;membrane;mitochondrion;nucleus | catalytic activity;nucleotide binding;protein binding                   | 3.962  | 2.008  | 0.51 |  |
| P53598 | Succinyl-CoA ligase [ADP-forming] subunit alpha, mitochondrial [OS=Saccharomyces cerevisiae S288c]           | 854310 | LSC1; YOR142W        | metabolic process                                                                   | cytosol;mitochondrion                            | catalytic activity;nucleotide binding                                   | 11.743 | 5.952  | 0.51 |  |
| Q12480 | Probable electron transfer flavoprotein subunit alpha, mitochondrial [OS=Saccharomyces cerevisiae S288c]     | 856112 | AIM45; YPR004C       | metabolic process;transport                                                         | mitochondrion;organelle lumen                    | catalytic activity;nucleotide binding                                   | 2.981  | 1.512  | 0.51 |  |
| P32266 | Dynamin-like GTPase MGM1, mitochondrial [OS=Saccharomyces cerevisiae S288c]                                  | 854386 | MGM1; YOR211C        | cell organization and biogenesis                                                    | membrane;mitochondrion                           | catalytic activity;nucleotide binding;protein binding                   | 0.448  | 0.228  | 0.51 |  |
| P50085 | Prohibitin-2 [OS=Saccharomyces cerevisiae S288c]                                                             | 853146 | PHB2; YGR231C        | cell organization and biogenesis;metabolic process;regulation of biological process | membrane;mitochondrion                           | protein binding                                                         | 4.926  | 2.511  | 0.51 |  |
| P32843 | Mitochondrial escape protein 2 [OS=Saccharomyces cerevisiae S288c]                                           | 855348 | YME2; YMR302C        | cell organization and biogenesis;metabolic process                                  | membrane;mitochondrion                           | nucleotide binding;RNA binding                                          | 5.158  | 2.643  | 0.51 |  |
| Q02776 | Mitochondrial import inner membrane translocase subunit TIM50 [OS=Saccharomyces cerevisiae S288c]            | 856042 | TIM50; YPL063W       | cell organization and biogenesis;metabolic process;transport                        | membrane;mitochondrion                           | catalytic activity;protein binding;transporter activity                 | 9      | 4.623  | 0.51 |  |
| P38127 | mitochondrial carrier protein RIM2 [OS=Saccharomyces                                                         | 852491 | RIM2; YBR192W        | cell organization and biogenesis;metabolic process;transport                        | membrane;mitochondrion                           | structural molecule                                                     | 1.512  | 0.778  | 0.51 |  |



|        |                                                                                                            |        |                      |                                                                                                          |                                                      |                                                                                     |        |        |      |
|--------|------------------------------------------------------------------------------------------------------------|--------|----------------------|----------------------------------------------------------------------------------------------------------|------------------------------------------------------|-------------------------------------------------------------------------------------|--------|--------|------|
|        | [OS=Saccharomyces cerevisiae S288c]                                                                        |        |                      |                                                                                                          |                                                      | tidal binding;RNA binding                                                           |        |        |      |
| P40582 | Glutathione S-transferase 1 [OS=Saccharomyces cerevisiae S288c]                                            | 854856 | GTT1; YIR038C        | metabolic process                                                                                        | endoplasmic reticulum;membrane;mitochondrion;nucleus | antioxidant activity;catalytic activity;protein binding;RNA binding                 | 1.683  | 0.931  | 0.55 |
| P50087 | MICOS subunit MIC26 [OS=Saccharomyces cerevisiae S288c]                                                    | 853150 | MOS2; MIC26; YGR235C | cell organization and biogenesis                                                                         | membrane;mitochondrion                               |                                                                                     | 1.683  | 0.931  | 0.55 |
| P39987 | Heat shock protein SSC3, mitochondrial [OS=Saccharomyces cerevisiae S288c]                                 | 856682 | ECM10; YEL030W       | cell organization and biogenesis;metabolic process;transport                                             | mitochondrion                                        | nucleotide binding;protein binding                                                  | 2.162  | 1.198  | 0.55 |
| P15108 | ATP-dependent molecular chaperone HSC82 [OS=Saccharomyces cerevisiae S288c]                                | 855224 | HSC82; YMR186W       | cell organization and biogenesis;metabolic process;response to stimulus                                  | cytoplasm;membrane;mitochondrion                     | catalytic activity;nucleotide binding;protein binding                               | 1.081  | 0.602  | 0.56 |
| P40364 | Mitochondrial peculiar membrane protein 1 [OS=Saccharomyces cerevisiae S288c]                              | 853379 | MPM1; YJL066C        |                                                                                                          | membrane;mitochondrion                               |                                                                                     | 1.512  | 0.848  | 0.56 |
| P37299 | cytochrome b-c1 complex subunit 10 [OS=Saccharomyces cerevisiae S288c]                                     | 856390 | QCR10; YHR001W-A     | metabolic process;transport                                                                              | membrane;mitochondrion                               | catalytic activity;transporter activity                                             | 5.31   | 2.981  | 0.56 |
| Q12233 | ATP synthase subunit g, mitochondrial [OS=Saccharomyces cerevisiae S288c]                                  | 856131 | ATP20; YPR020W       | cell organization and biogenesis;metabolic process;transport                                             | membrane;mitochondrion                               | catalytic activity;transporter activity                                             | 1.371  | 0.778  | 0.57 |
| P36147 | Presequence translocated-associated motor subunit pam17, mitochondrial [OS=Saccharomyces cerevisiae S288c] | 853939 | PAM17; YKR065C       | transport                                                                                                | membrane;mitochondrion                               |                                                                                     | 1.371  | 0.778  | 0.57 |
| Q06485 | Autophagy-related protein 33 [OS=Saccharomyces cerevisiae S288c]                                           | 851070 | ATG33; YLR356W       | cell communication;metabolic process;response to stimulus                                                | membrane;mitochondrion                               |                                                                                     | 1.371  | 0.778  | 0.57 |
| P17505 | Malate dehydrogenase, mitochondrial [OS=Saccharomyces cerevisiae S288c]                                    | 853777 | MDH1; YKL085W        | metabolic process                                                                                        | mitochondrion;organelle lumen                        | catalytic activity;protein binding;RNA binding                                      | 56.797 | 32.405 | 0.57 |
| P42940 | Probable electron transfer flavoprotein subunit beta [OS=Saccharomyces cerevisiae S288c]                   | 853121 | CIR1; YGR207C        | metabolic process;transport                                                                              | mitochondrion;organelle lumen                        |                                                                                     | 4.623  | 2.652  | 0.57 |
| P16387 | Pyruvate dehydrogenase E1 component subunit alpha, mitochondrial [OS=Saccharomyces cerevisiae S288c]       | 856925 | PDA1; YER178W        | cell growth;metabolic process                                                                            | mitochondrion;organelle lumen                        | catalytic activity                                                                  | 21.638 | 12.46  | 0.58 |
| P36775 | Lon protease homolog, mitochondrial [OS=Saccharomyces cerevisiae S288c]                                    | 852259 | PIM1; YBL022C        | cell organization and biogenesis;metabolic process;regulation of biological process;response to stimulus | cytoplasm;mitochondrion;organelle lumen              | catalytic activity;DNA binding;nucleotide binding;RNA binding                       | 1.362  | 0.792  | 0.58 |
| P04710 | ADP,ATP carrier protein 1 [OS=Saccharomyces cerevisiae S288c]                                              | 855078 | AAC1; YMR056C        | metabolic process;transport                                                                              | cytosol;membrane;mitochondrion                       | structural molecule activity;transporter activity                                   | 11.743 | 6.848  | 0.58 |
| P28834 | Isocitrate dehydrogenase [NAD] subunit 1, mitochondrial [OS=Saccharomyces cerevisiae S288c]                | 855691 | IDH1; YNL037C        | metabolic process;transport                                                                              | cytosol;mitochondrion;organelle lumen                | catalytic activity;metal ion binding;nucleotide binding;protein binding;RNA binding | 15.238 | 9      | 0.59 |
| P36527 | 54S ribosomal protein L28, mitochondrial [OS=Saccharomyces cerevisiae S288c]                               | 852073 | MRPL28; YDR462W      | cell organization and biogenesis;metabolic process                                                       | mitochondrion;ribosome                               | structural molecule activity                                                        | 0.874  | 0.52   | 0.59 |
| P16622 | Ferrochelatase, mitochondrial [OS=Saccharomyces cerevisiae S288c]                                          | 854347 | HEM15; YOR176W       | metabolic process                                                                                        | membrane;mitochondrion                               | catalytic activity                                                                  | 6.305  | 3.806  | 0.60 |
| P40012 | protoporphyrinogen oxidase [OS=Saccharomyces cerevisiae S288c]                                             | 856733 | HEM14; YER014W       | metabolic process                                                                                        | membrane;mitochondrion                               | catalytic activity                                                                  | 2.162  | 1.336  | 0.62 |
| P32453 | Protein ATP11, mitochondrial [OS=Saccharomyces cerevisiae S288c]                                           | 855401 | ATP11; YNL315C       | cell organization and biogenesis                                                                         | mitochondrion                                        | protein binding                                                                     | 1.239  | 0.778  | 0.63 |
| P40215 | External NADH-ubiquinone oxidoreductase 1, mitochondrial [OS=Saccharomyces cerevisiae S288c]               | 855176 | NDE1; YMR145C        | metabolic process                                                                                        | mitochondrion                                        | catalytic activity;nucleotide binding                                               | 5.469  | 3.453  | 0.63 |
| Q08822 | Probable electron transfer flavoprotein-ubiquinone oxidoreductase, mitochondrial                           | 854538 | CIR2; YOR356W        | metabolic process;transport                                                                              | membrane;mitochondrion                               | catalytic activity;metal ion                                                        | 3.424  | 2.162  | 0.63 |

|          |                                                                                                    |        |                         |                                                                                              |                                         |                                                            |       |       |      |
|----------|----------------------------------------------------------------------------------------------------|--------|-------------------------|----------------------------------------------------------------------------------------------|-----------------------------------------|------------------------------------------------------------|-------|-------|------|
|          | [OS=Saccharomyces cerevisiae S288c]                                                                |        |                         |                                                                                              |                                         | binding;nucleotide binding                                 |       |       |      |
| P54857   | lipase 2 [OS=Saccharomyces cerevisiae S288c]                                                       | 851628 | TGL2; YDR058C           | metabolic process;transport                                                                  | mitochondrion                           | catalytic activity                                         | 0.369 | 0.233 | 0.63 |
| P51998   | 54S ribosomal protein yml6, mitochondrial [OS=Saccharomyces cerevisiae S288c]                      | 854983 | YML6; YML025C           | cell organization and biogenesis;metabolic process                                           | mitochondrion;ribosome                  | RNA binding;structural molecule activity                   | 1.154 | 0.73  | 0.63 |
| P33310   | ATP-dependent permease MDL1, mitochondrial [OS=Saccharomyces cerevisiae S288c]                     | 850885 | MDL1; YLR188W           | transport                                                                                    | membrane;mitochondrion                  | catalytic activity;nucleotide binding;transporter activity | 0.833 | 0.528 | 0.63 |
| Q05648   | MIOREX complex component 10 [OS=Saccharomyces cerevisiae S288c]                                    | 851876 | YDR282C; MRX10; YDR282C |                                                                                              | membrane;mitochondrion                  |                                                            | 0.35  | 0.222 | 0.63 |
| P47015   | Altered inheritance of mitochondria protein 23, mitochondrial [OS=Saccharomyces cerevisiae S288c]  | 853310 | AIM23; YJL131C          | metabolic process                                                                            | mitochondrion                           | RNA binding                                                | 0.35  | 0.222 | 0.63 |
| P28817   | 3-hydroxyisobutyryl-CoA hydrolase, mitochondrial [OS=Saccharomyces cerevisiae S288c]               | 851606 | EHD3; YDR036C           | metabolic process                                                                            | mitochondrion                           | catalytic activity                                         | 1.395 | 0.887 | 0.64 |
| Q01532-1 | Cysteine proteinase 1, mitochondrial [OS=Saccharomyces cerevisiae S288c]                           |        | MCY1                    | metabolic process;regulation of biological process;response to stimulus                      | cytoplasm;mitochondrion                 | catalytic activity;DNA binding;RNA binding                 | 0.28  | 0.179 | 0.64 |
| P03879   | Intron-encoded RNA maturase bi4 [OS=Saccharomyces cerevisiae S288c]                                | 854582 | BI4; Q0120              | metabolic process                                                                            | membrane;mitochondrion                  | catalytic activity;RNA binding                             | 0.28  | 0.179 | 0.64 |
| P17967   | Protein disulfide-isomerase [OS=Saccharomyces cerevisiae S288c]                                    | 850314 | PDI1; YCL043C           | cellular homeostasis;metabolic process;regulation of biological process;response to stimulus | endoplasmic reticulum;organelle lumen   | catalytic activity;protein binding                         | 1.326 | 0.848 | 0.64 |
| P10849   | mitochondrial transcription factor 2 [OS=Saccharomyces cerevisiae S288c]                           | 851517 | MTF2; YDL044C           | metabolic process                                                                            | mitochondrion;organelle lumen           | protein binding;RNA binding                                | 0.259 | 0.166 | 0.64 |
| Q03557   | Glutamyl-tRNA(Gln) amidotransferase subunit A, mitochondrial [OS=Saccharomyces cerevisiae S288c]   | 855338 | HER2; YMR293C           | cell organization and biogenesis;metabolic process                                           | mitochondrion                           | catalytic activity;nucleotide binding                      | 0.259 | 0.166 | 0.64 |
| P38705   | Serine-tRNA ligase, mitochondrial [OS=Saccharomyces cerevisiae S288c]                              | 856402 | DIA4; YHR011W           | metabolic process                                                                            | cytoplasm;mitochondrion;organelle lumen | catalytic activity;nucleotide binding                      | 0.233 | 0.15  | 0.64 |
| P23180   | Probable oxidoreductase AIM17 [OS=Saccharomyces cerevisiae S288c]                                  | 856365 | AIM17; YHL021C          | cell organization and biogenesis;metabolic process                                           | mitochondrion                           | catalytic activity;metal ion binding                       | 4.623 | 2.981 | 0.64 |
| P53732   | 37S ribosomal protein S12, mitochondrial [OS=Saccharomyces cerevisiae S288c]                       | 855772 | MRPS12; YNR036C         | cell organization and biogenesis;metabolic process                                           | mitochondrion;ribosome                  | structural molecule activity                               | 1.783 | 1.154 | 0.65 |
| P39677   | Ribosome-releasing factor 2, mitochondrial [OS=Saccharomyces cerevisiae S288c]                     | 853342 | MEF2; YJL102W           | cell organization and biogenesis;metabolic process                                           | cytosol;mitochondrion                   | catalytic activity;nucleotide binding;RNA binding          | 0.179 | 0.116 | 0.65 |
| P39006   | Phosphatidylserine decarboxylase proenzyme 1, mitochondrial [OS=Saccharomyces cerevisiae S288c]    | 855552 | PSD1; YNL169C           | metabolic process;regulation of biological process                                           | membrane;mitochondrion                  | catalytic activity                                         | 0.743 | 0.487 | 0.66 |
| P53969   | Sorting assembly machinery 50 kDa subunit [OS=Saccharomyces cerevisiae S288c]                      | 855705 | SAM50; YNL026W          | cell organization and biogenesis;transport                                                   | membrane;mitochondrion                  | protein binding;transporter activity                       | 0.743 | 0.487 | 0.66 |
| Q04728   | Arginine biosynthesis bifunctional protein Arg1, mitochondrial [OS=Saccharomyces cerevisiae S288c] | 855084 | ARG7; YMR062C           | metabolic process                                                                            | mitochondrion;organelle lumen           | catalytic activity                                         | 0.63  | 0.417 | 0.66 |
| Q06143   | mitochondrial dicarboxylate transporter [OS=Saccharomyces cerevisiae S288c]                        | 851063 | DIC1; YLR348C           | metabolic process;transport                                                                  | membrane;mitochondrion                  | structural molecule activity;transporter activity          | 1.404 | 0.931 | 0.66 |
| P23369   | 54S ribosomal protein L25, mitochondrial [OS=Saccharomyces cerevisiae S288c]                       | 852967 | MRPL25; YGR076C         | cell organization and biogenesis;metabolic process                                           | mitochondrion;ribosome                  | structural molecule activity                               | 1.31  | 0.874 | 0.67 |
| P38910   | 10 kDa heat shock protein, mitochondrial [OS=Saccharomyces cerevisiae S288c]                       | 854185 | HSP10; YOR020C          | cell organization and biogenesis;metabolic process;response to stimulus;transport            | cytoplasm;mitochondrion;organelle lumen | metal ion binding;nucleotide binding;protein binding       | 3.217 | 2.162 | 0.67 |
| P07806   | Valine-tRNA ligase, mitochondrial [OS=Saccharomyces cerevisiae S288c]                              | 852986 | VAS1; YGR094W           | metabolic process;regulation of biological process                                           | cytoplasm;cytosol;mitochondrion         | catalytic activity;nucleotide binding                      | 0.616 | 0.422 | 0.69 |

|        |                                                                                                                                                     |        |                 |                                                                                                                                                            |                                        |                                                                           |        |       |      |
|--------|-----------------------------------------------------------------------------------------------------------------------------------------------------|--------|-----------------|------------------------------------------------------------------------------------------------------------------------------------------------------------|----------------------------------------|---------------------------------------------------------------------------|--------|-------|------|
| P16451 | Pyruvate dehydrogenase complex protein X component, mitochondrial [OS=Saccharomyces cerevisiae S288c]                                               | 853107 | PDX1; YGR193C   | metabolic process                                                                                                                                          | mitochondrion;organelle lumen          | catalytic activity;structural molecule activity                           | 2.594  | 1.783 | 0.69 |
| P38969 | Pentamidine resistance factor, mitochondrial [OS=Saccharomyces cerevisiae S288c]                                                                    | 854440 | PNT1; YOR266W   | cell organization and biogenesis;response to stimulus                                                                                                      | membrane;mitochondrion                 |                                                                           | 0.848  | 0.585 | 0.69 |
| P49095 | Glycine dehydrogenase (Decarboxylating), mitochondrial [OS=Saccharomyces cerevisiae S288c]                                                          | 855227 | GCV2; YMR189W   | metabolic process                                                                                                                                          | cytosol;mitochondrion                  | catalytic activity                                                        | 2.433  | 1.683 | 0.69 |
| P07257 | Cytochrome b-c1 complex subunit 2, mitochondrial [OS=Saccharomyces cerevisiae S288c]                                                                | 856321 | QCR2; YPR191W   | metabolic process;transport                                                                                                                                | membrane;mitochondrion                 | catalytic activity;metal ion binding;protein binding;transporter activity | 36.751 | 25.49 | 0.69 |
| Q06668 | Methyltransferase OMS1, mitochondrial [OS=Saccharomyces cerevisiae S288c]                                                                           | 851911 | OMS1; YDR316W   | metabolic process                                                                                                                                          | membrane;mitochondrion                 | catalytic activity                                                        | 0.693  | 0.484 | 0.70 |
| P19262 | Dihydrolipoylysine-residue succinyltransferase component of 2-oxoglutarate dehydrogenase complex, mitochondrial [OS=Saccharomyces cerevisiae S288c] | 851726 | KGD2; YDR148C   | cell organization and biogenesis;metabolic process                                                                                                         | mitochondrion                          | catalytic activity;protein binding                                        | 6.406  | 4.484 | 0.70 |
| P38891 | Branched-chain-amino-acid aminotransferase, mitochondrial [OS=Saccharomyces cerevisiae S288c]                                                       | 856615 | BAT1; YHR208W   | metabolic process;regulation of biological process;response to stimulus                                                                                    | mitochondrion;organelle lumen          | catalytic activity                                                        | 9      | 6.305 | 0.70 |
| P11914 | Mitochondrial-processing peptidase subunit alpha [OS=Saccharomyces cerevisiae S288c]                                                                | 856419 | MAS2; YHR024C   | metabolic process;transport                                                                                                                                | membrane;mitochondrion;organelle lumen | catalytic activity;metal ion binding;protein binding                      | 1.291  | 0.905 | 0.70 |
| P38152 | Tricarboxylate transport protein [OS=Saccharomyces cerevisiae S288c]                                                                                | 852594 | CTP1; YBR291C   | metabolic process;transport                                                                                                                                | membrane;mitochondrion                 | structural molecule activity;transporter activity                         | 0.551  | 0.389 | 0.71 |
| Q08179 | Mitochondrial distribution and morphology protein 38 [OS=Saccharomyces cerevisiae S288c]                                                            | 854130 | MDM38; YOL027C  | cell organization and biogenesis;cellular homeostasis;regulation of biological process;transport                                                           | membrane;mitochondrion                 |                                                                           | 6.079  | 4.309 | 0.71 |
| P38077 | ATP synthase subunit gamma, mitochondrial [OS=Saccharomyces cerevisiae S288c]                                                                       | 852327 | ATP3; YBR039W   | metabolic process;transport                                                                                                                                | membrane;mitochondrion                 | catalytic activity;transporter activity                                   | 12.689 | 9     | 0.71 |
| P36528 | 54S ribosomal protein L17, mitochondrial [OS=Saccharomyces cerevisiae S288c]                                                                        | 855469 | MRPL17; YNL252C | cell organization and biogenesis;metabolic process                                                                                                         | mitochondrion;ribosome                 | structural molecule activity                                              | 0.52   | 0.369 | 0.71 |
| P48015 | Aminomethyltransferase, mitochondrial [OS=Saccharomyces cerevisiae S288c]                                                                           | 851582 | GCV1; YDR019C   | metabolic process                                                                                                                                          | mitochondrion                          | catalytic activity;protein binding                                        | 9      | 6.406 | 0.71 |
| P38702 | mitochondrial carrier protein LEU5 [OS=Saccharomyces cerevisiae S288c]                                                                              | 856391 | LEU5; YHR002W   | metabolic process;transport                                                                                                                                | membrane;mitochondrion                 | structural molecule activity;transporter activity                         | 0.468  | 0.334 | 0.71 |
| Q04172 | Sensitive to high expression protein 9, mitochondrial [OS=Saccharomyces cerevisiae S288c]                                                           | 852002 | SHE9; YDR393W   | cell organization and biogenesis                                                                                                                           | membrane;mitochondrion                 |                                                                           | 0.374  | 0.269 | 0.72 |
| P04807 | Hexokinase-2 [OS=Saccharomyces cerevisiae S288c]                                                                                                    | 852639 | HXK2; YGL253W   | cell communication;cell organization and biogenesis;cellular homeostasis;metabolic process;regulation of biological process;response to stimulus;transport | cytosol;mitochondrion                  | catalytic activity;nucleotide binding                                     | 0.359  | 0.259 | 0.72 |
| P32897 | Mitochondrial import inner membrane translocase subunit tim23 [OS=Saccharomyces cerevisiae S288c]                                                   | 855751 | TIM23; YNR017W  | transport                                                                                                                                                  | membrane;mitochondrion                 | protein binding;transporter activity                                      | 2.981  | 2.162 | 0.73 |
| P37292 | Serine hydroxymethyltransferase, mitochondrial [OS=Saccharomyces cerevisiae S288c]                                                                  | 852565 | SHM1; YBR263W   | metabolic process                                                                                                                                          | mitochondrion                          | catalytic activity                                                        | 9      | 6.565 | 0.73 |
| P07213 | Mitochondrial import receptor subunit TOM70 [OS=Saccharomyces cerevisiae S288c]                                                                     | 855602 | TOM70; YNL121C  | cell organization and biogenesis;transport                                                                                                                 | membrane;mitochondrion                 | protein binding;transporter activity                                      | 3.642  | 2.665 | 0.73 |
| P54783 | D-arabinono-1,4-lactone oxidase [OS=Saccharomyces cerevisiae S288c]                                                                                 | 854888 | ALO1; YML086C   | metabolic process;response to stimulus                                                                                                                     | membrane;mitochondrion                 | catalytic activity;nucleotide binding                                     | 3.299  | 2.415 | 0.73 |
| P43616 | Cys-Gly metalloprotease dug1 [OS=Saccharomyces cerevisiae S288c]                                                                                    | 850605 | DUG1; YFR044C   | metabolic process                                                                                                                                          | cytoplasm;mitochondrion;ribosome       | catalytic activity;metal ion binding                                      | 1.154  | 0.848 | 0.73 |

|        |                                                                                                              |        |                       |                                                                                               |                                                 |                                                                                 |        |        |      |
|--------|--------------------------------------------------------------------------------------------------------------|--------|-----------------------|-----------------------------------------------------------------------------------------------|-------------------------------------------------|---------------------------------------------------------------------------------|--------|--------|------|
| Q02204 | 54S ribosomal protein L13, mitochondrial [OS=Saccharomyces cerevisiae S288c]                                 | 853875 | MRPL13; YKR006C       | cell organization and biogenesis;metabolic process                                            | mitochondrion;ribosome                          | structural molecule activity                                                    | 1.054  | 0.778  | 0.74 |
| P40047 | Aldehyde dehydrogenase 5, mitochondrial [OS=Saccharomyces cerevisiae S288c]                                  | 856804 | ALD5; YER073W         | metabolic process                                                                             | mitochondrion;organelle lumen                   | catalytic activity                                                              | 2.384  | 1.762  | 0.74 |
| P50945 | MICOS complex subunit MIC27 [OS=Saccharomyces cerevisiae S288c]                                              | 855623 | AIM37; MIC27; YNL100W | cell organization and biogenesis                                                              | membrane;mitochondrion                          |                                                                                 | 0.968  | 0.719  | 0.74 |
| P28625 | Protein YIM1 [OS=Saccharomyces cerevisiae S288c]                                                             | 855183 | YIM1; YMR152W         | metabolic process;response to stimulus                                                        | cytoplasm;endoplasmic reticulum;mitochondrion   | catalytic activity;metal ion binding                                            | 0.833  | 0.624  | 0.75 |
| P53736 | Uncharacterized protein YNR040W [OS=Saccharomyces cerevisiae S288c]                                          | 855776 | YNR040W; YNR040W      |                                                                                               | mitochondrion                                   |                                                                                 | 0.73   | 0.551  | 0.75 |
| P36013 | NAD-dependent malic enzyme, mitochondrial [OS=Saccharomyces cerevisiae S288c]                                | 853839 | MAE1; YKL029C         | metabolic process                                                                             | mitochondrion;organelle lumen                   | catalytic activity;metal ion binding;nucleotide binding                         | 1.985  | 1.512  | 0.76 |
| P36112 | MICOS complex subunit Mic60 [OS=Saccharomyces cerevisiae S288c]                                              | 853886 | FCJ1; MIC60; YKR016W  | cell organization and biogenesis;transport                                                    | membrane;mitochondrion                          |                                                                                 | 15.379 | 11.798 | 0.77 |
| P07251 | ATP synthase subunit alpha, mitochondrial [OS=Saccharomyces cerevisiae S288c]                                | 852177 | ATP1; YBL099W         | metabolic process;transport                                                                   | cytosol;membrane;mitochondrion                  | catalytic activity;nucleotide binding;transporter activity                      | 34.938 | 26.826 | 0.77 |
| P32904 | 54S ribosomal protein L6, mitochondrial [OS=Saccharomyces cerevisiae S288c]                                  | 856552 | MRPL6; YHR147C        | cell organization and biogenesis;metabolic process                                            | mitochondrion;ribosome                          | RNA binding;structural molecule activity                                        | 1.371  | 1.054  | 0.77 |
| P0CS90 | Heat shock protein SSC1, mitochondrial [OS=Saccharomyces cerevisiae S288c]                                   | 853503 | SSC1; YJR045C         | cell organization and biogenesis;metabolic process;regulation of biological process;transport | membrane;mitochondrion;nucleus;organelle lumen  | catalytic activity;enzyme regulator activity;nucleotide binding;protein binding | 48.482 | 37.312 | 0.77 |
| P36060 | NADH-cytochrome b5 reductase 2 [OS=Saccharomyces cerevisiae S288c]                                           | 853707 | MCR1; YKL150W         | metabolic process;response to stimulus                                                        | membrane;mitochondrion                          | catalytic activity;protein binding                                              | 15.238 | 11.743 | 0.77 |
| P38771 | Ribosome-recycling factor, mitochondrial [OS=Saccharomyces cerevisiae S288c]                                 | 856433 | RRF1; YHR038W         | cell organization and biogenesis;metabolic process                                            | mitochondrion                                   | RNA binding                                                                     | 1.254  | 0.968  | 0.77 |
| P23644 | Mitochondrial import receptor subunit TOM40 [OS=Saccharomyces cerevisiae S288c]                              | 855243 | TOM40; YMR203W        | transport                                                                                     | cytosol;membrane;mitochondrion                  | protein binding;transporter activity                                            | 1.154  | 0.896  | 0.78 |
| P36521 | 54S ribosomal protein L11, mitochondrial [OS=Saccharomyces cerevisiae S288c]                                 | 851325 | MRPL11; YDL202W       | cell organization and biogenesis;metabolic process                                            | mitochondrion;ribosome                          | structural molecule activity                                                    | 1.069  | 0.833  | 0.78 |
| Q00711 | Succinate dehydrogenase [ubiquinone] flavoprotein subunit, mitochondrial [OS=Saccharomyces cerevisiae S288c] | 853709 | SDH1; YKL148C         | metabolic process;transport                                                                   | membrane;mitochondrion                          | catalytic activity;nucleotide binding;protein binding                           | 12.242 | 9.578  | 0.78 |
| Q08023 | Protein FMP25, mitochondrial [OS=Saccharomyces cerevisiae S288c]                                             | 850766 | FMP25; YLR077W        | cell organization and biogenesis                                                              | membrane;mitochondrion                          |                                                                                 | 1.412  | 1.106  | 0.78 |
| P48526 | Isoleucine--tRNA ligase, mitochondrial [OS=Saccharomyces cerevisiae S288c]                                   | 856067 | ISM1; YPL040C         | cell organization and biogenesis;metabolic process;regulation of biological process           | cytoplasm;cytosol;mitochondrion;organelle lumen | catalytic activity;nucleotide binding                                           | 0.215  | 0.169  | 0.79 |
| P32611 | 54S ribosomal protein RML2, mitochondrial [OS=Saccharomyces cerevisiae S288c]                                | 856660 | RML2; YEL050C         | cell organization and biogenesis;metabolic process                                            | mitochondrion;ribosome                          | catalytic activity;RNA binding;structural molecule activity                     | 0.638  | 0.509  | 0.80 |
| Q06493 | LETM1 domain-containing protein YLH47, mitochondrial [OS=Saccharomyces cerevisiae S288c]                     | 856243 | YLH47; YPR125W        | cell organization and biogenesis;transport                                                    | membrane;mitochondrion                          |                                                                                 | 0.61   | 0.487  | 0.80 |
| Q08223 | Altered inheritance of mitochondria protein 39, mitochondrial [OS=Saccharomyces cerevisiae S288c]            | 854103 | AIM39; YOL053W        |                                                                                               | cytosol;membrane;mitochondrion                  |                                                                                 | 0.585  | 0.468  | 0.80 |
| P48527 | Tyrosine--tRNA ligase, mitochondrial [OS=Saccharomyces cerevisiae S288c]                                     | 856007 | MSY1; YPL097W         | metabolic process                                                                             | cytoplasm;cytosol;mitochondrion;organelle lumen | catalytic activity;nucleotide binding;RNA binding                               | 0.52   | 0.417  | 0.80 |
| P38323 | ATP-dependent clpX-like chaperone, mitochondrial [OS=Saccharomyces cerevisiae S288c]                         | 852528 | MCX1; YBR227C         | metabolic process                                                                             | membrane;mitochondrion;organelle lumen          | catalytic activity;nucleotide binding                                           | 0.501  | 0.403  | 0.80 |



|          |                                                                                                      |        |                 |                                                                                                             |                                                 |                                                                         |        |        |      |
|----------|------------------------------------------------------------------------------------------------------|--------|-----------------|-------------------------------------------------------------------------------------------------------------|-------------------------------------------------|-------------------------------------------------------------------------|--------|--------|------|
|          | S288c]                                                                                               |        |                 |                                                                                                             |                                                 |                                                                         |        |        |      |
| P53881   | 54S ribosomal protein L22, mitochondrial [OS=Saccharomyces cerevisiae S288c]                         | 855544 | MRPL22; YNL177C | cell organization and biogenesis;metabolic process                                                          | mitochondrion;ribosome                          | RNA binding;structural molecule activity                                | 1.154  | 0.931  | 0.81 |
| P33311   | ATP-dependent permease MDL2, mitochondrial [OS=Saccharomyces cerevisiae S288c]                       | 855858 | MDL2; YPL270W   | response to stimulus;transport                                                                              | membrane;mitochondrion                          | catalytic activity;nucleotide binding;transporter activity              | 1.116  | 0.901  | 0.81 |
| Q03976   | 37S ribosomal protein S24, mitochondrial [OS=Saccharomyces cerevisiae S288c]                         | 851755 | RSM24; YDR175C  | cell organization and biogenesis;metabolic process                                                          | mitochondrion;ribosome                          | structural molecule activity                                            | 0.905  | 0.738  | 0.82 |
| P08466   | mitochondrial nuclease [OS=Saccharomyces cerevisiae S288c]                                           | 853222 | NUC1; YJL208C   | cell death;metabolic process                                                                                | membrane;mitochondrion;nucleus                  | catalytic activity;metal ion binding                                    | 1.637  | 1.336  | 0.82 |
| P30902   | ATP synthase subunit d, mitochondrial [OS=Saccharomyces cerevisiae S288c]                            | 853853 | ATP7; YKL016C   | metabolic process;transport                                                                                 | membrane;mitochondrion                          | catalytic activity;transporter activity                                 | 5.105  | 4.179  | 0.82 |
| P36516   | 54S ribosomal protein L3, mitochondrial [OS=Saccharomyces cerevisiae S288c]                          | 855039 | MRPL3; YMR024W  | cell organization and biogenesis;metabolic process;response to stimulus                                     | mitochondrion;nucleus;ribosome                  | catalytic activity;RNA binding;structural molecule activity             | 0.743  | 0.61   | 0.82 |
| P47045   | mitochondrial import inner membrane translocase subunit TIM54 [OS=Saccharomyces cerevisiae S288c]    | 853392 | TIM54; YJL054W  | cell organization and biogenesis;transport                                                                  | cytosol;membrane;mitochondrion                  | transporter activity                                                    | 0.655  | 0.54   | 0.82 |
| Q12166   | 2-isopropylmalate synthase 2, mitochondrial [OS=Saccharomyces cerevisiae S288c]                      | 854275 | LEU9; YOR108W   | metabolic process                                                                                           | mitochondrion                                   | catalytic activity;protein binding                                      | 2.472  | 2.065  | 0.84 |
| P06168   | ketol-acid reductoisomerase, mitochondrial [OS=Saccharomyces cerevisiae S288c]                       | 851069 | ILV5; YLR355C   | cell organization and biogenesis;metabolic process                                                          | mitochondrion                                   | catalytic activity;DNA binding;metal ion binding                        | 12.895 | 10.788 | 0.84 |
| P15424   | ATP-dependent RNA helicase MSS116, mitochondrial [OS=Saccharomyces cerevisiae S288c]                 | 851775 | MSS116; YDR194C | metabolic process;regulation of biological process                                                          | mitochondrion;organelle lumen                   | catalytic activity;nucleotide binding;RNA binding                       | 1.644  | 1.387  | 0.84 |
| P07275   | Delta-1-pyrroline-5-carboxylate dehydrogenase, mitochondrial [OS=Saccharomyces cerevisiae S288c]     | 856432 | PUT2; YHR037W   | metabolic process                                                                                           | membrane;mitochondrion;organelle lumen          | catalytic activity                                                      | 6.055  | 5.136  | 0.85 |
| P00360   | glyceraldehyde-3-phosphate dehydrogenase 1 [OS=Saccharomyces cerevisiae S288c]                       | 853395 | TDH1; YJL052W   | metabolic process                                                                                           | cytoplasm;cytosol;membrane;mitochondrion        | catalytic activity;nucleotide binding                                   | 1.721  | 1.462  | 0.85 |
| P09440   | C-1-tetrahydrofolate synthase, mitochondrial [OS=Saccharomyces cerevisiae S288c]                     | 852378 | MIS1; YBR084W   | metabolic process                                                                                           | cytosol;mitochondrion                           | catalytic activity;nucleotide binding                                   | 1.049  | 0.9    | 0.86 |
| P09457   | ATP synthase subunit 5, mitochondrial [OS=Saccharomyces cerevisiae S288c]                            | 851892 | ATP5; YDR298C   | metabolic process;transport                                                                                 | membrane;mitochondrion                          | catalytic activity;transporter activity                                 | 9      | 7.799  | 0.87 |
| P04840   | Mitochondrial outer membrane protein porin 1 [OS=Saccharomyces cerevisiae S288c]                     | 855669 | POR1; YNL055C   | cell death;cell organization and biogenesis;cellular homeostasis;regulation of biological process;transport | cytoplasm;membrane;mitochondrion                | transporter activity                                                    | 15.238 | 13.384 | 0.88 |
| P40341   | Mitochondrial respiratory chain complexes assembly protein YTA12 [OS=Saccharomyces cerevisiae S288c] | 855114 | YTA12; YMR089C  | cell organization and biogenesis;metabolic process;response to stimulus;transport                           | cytoplasm;membrane;mitochondrion                | catalytic activity;metal ion binding;nucleotide binding;protein binding | 1.371  | 1.276  | 0.93 |
| P06208-1 | 2-isopropylmalate synthase [OS=Saccharomyces cerevisiae S288c]                                       | 855619 | LEU4; YNL104C   | metabolic process                                                                                           | cytoplasm;mitochondrion                         | catalytic activity;protein binding                                      | 5.236  | 4.878  | 0.93 |
| P19414   | Aconitate hydratase, mitochondrial [OS=Saccharomyces cerevisiae S288c]                               | 851013 | ACO1; YLR304C   | cell organization and biogenesis;metabolic process;transport                                                | cytoplasm;cytosol;mitochondrion;organelle lumen | catalytic activity;DNA binding;metal ion binding                        | 48.619 | 46.197 | 0.95 |
| P07342   | Acetolactate synthase catalytic subunit, mitochondrial [OS=Saccharomyces cerevisiae S288c]           | 855135 | ILV2; YMR108W   | metabolic process                                                                                           | mitochondrion                                   | catalytic activity;metal ion binding;nucleotide binding                 | 4.223  | 4.223  | 1.00 |
| P47127   | Altered inheritance of mitochondria protein 24, mitochondrial [OS=Saccharomyces cerevisiae S288c]    | 853543 | AIM24; YJR080C  | cell organization and biogenesis                                                                            | mitochondrion                                   |                                                                         | 2.857  | 2.857  | 1.00 |
| P34227   | Mitochondrial peroxiredoxin PRX1 [OS=Saccharomyces cerevisiae S288c]                                 | 852215 | PRX1; YBL064C   | cellular homeostasis;metabolic process;regulation of biological process;response to stimulus                | mitochondrion                                   | antioxidant activity;catalytic activity                                 | 5.158  | 5.158  | 1.00 |

|        |                                                                                                   |        |                        |                                                                                                                                       |                                                      |                                                            |       |       |      |
|--------|---------------------------------------------------------------------------------------------------|--------|------------------------|---------------------------------------------------------------------------------------------------------------------------------------|------------------------------------------------------|------------------------------------------------------------|-------|-------|------|
| Q03104 | Meiotic sister chromatid recombination protein 1 [OS=Saccharomyces cerevisiae S288c]              | 854911 | MSC1; YML128C          | metabolic process                                                                                                                     | endoplasmic reticulum;membrane;mitochondrion         |                                                            | 2.415 | 2.415 | 1.00 |
| Q03028 | Mitochondrial 2-oxodicarboxylate carrier 1 [OS=Saccharomyces cerevisiae S288c]                    | 855969 | ODC1; YPL134C          | metabolic process;transport                                                                                                           | membrane;mitochondrion                               | structural molecule activity;transporter activity          | 5.813 | 5.813 | 1.00 |
| P52893 | probable alanine aminotransferase, mitochondrial [OS=Saccharomyces cerevisiae S288c]              | 850778 | ALT1; YLR089C          | metabolic process                                                                                                                     | mitochondrion;organelle lumen                        | catalytic activity                                         | 1.102 | 1.102 | 1.00 |
| P38988 | Mitochondrial GTP/GDP carrier protein 1 [OS=Saccharomyces cerevisiae S288c]                       | 851329 | GGC1; YDL198C          | cell organization and biogenesis;cellular homeostasis;metabolic process;transport                                                     | membrane;mitochondrion                               | structural molecule activity;transporter activity          | 3.16  | 3.16  | 1.00 |
| Q12029 | Probable mitochondrial transport protein fsf1 [OS=Saccharomyces cerevisiae S288c]                 | 854445 | FSF1; YOR271C          | transport                                                                                                                             | membrane;mitochondrion                               | transporter activity                                       | 2.36  | 2.36  | 1.00 |
| Q07349 | MIOREX complex component 9 [OS=Saccharomyces cerevisiae S288c]                                    | 851535 | YDL027C; MRX9; YDL027C |                                                                                                                                       | endoplasmic reticulum;membrane;mitochondrion         |                                                            | 1.913 | 1.913 | 1.00 |
| P39518 | Long-chain-fatty-acid--CoA ligase 2 [OS=Saccharomyces cerevisiae S288c]                           | 856734 | FAA2; YER015W          | metabolic process;transport                                                                                                           | cytoplasm;mitochondrion                              | catalytic activity;nucleotide binding                      | 0.619 | 0.619 | 1.00 |
| P32331 | Carrier protein YMC1, mitochondrial [OS=Saccharomyces cerevisiae S288c]                           | 856171 | YMC1; YPR058W          | metabolic process;transport                                                                                                           | membrane;mitochondrion;vacuole                       | structural molecule activity;transporter activity          | 1.581 | 1.581 | 1.00 |
| P38825 | Protein TOM71 [OS=Saccharomyces cerevisiae S288c]                                                 | 856517 | TOM71; YHR117W         | transport                                                                                                                             | membrane;mitochondrion                               | protein binding;transporter activity                       | 0.512 | 0.512 | 1.00 |
| P40508 | Uncharacterized protein YIL077C [OS=Saccharomyces cerevisiae S288c]                               | 854733 | YIL077C; YIL077C       |                                                                                                                                       | mitochondrion                                        |                                                            | 0.896 | 0.896 | 1.00 |
| P15179 | Aspartate--tRNA ligase, mitochondrial [OS=Saccharomyces cerevisiae S288c]                         | 856000 | MSD1; YPL104W          | metabolic process                                                                                                                     | cytoplasm;mitochondrion;organelle lumen              | catalytic activity;nucleotide binding                      | 0.379 | 0.379 | 1.00 |
| P00950 | Phosphoglycerate mutase 1 [OS=Saccharomyces cerevisiae S288c]                                     | 853705 | GPM1; YKL152C          | metabolic process;regulation of biological process                                                                                    | cytoplasm;cytosol;membrane;mitochondrion             | catalytic activity                                         | 1.929 | 1.929 | 1.00 |
| P40416 | Iron-sulfur clusters transporter ATM1, mitochondrial [OS=Saccharomyces cerevisiae S288c]          | 855347 | ATM1; YMR301C          | cellular homeostasis;metabolic process;transport                                                                                      | membrane;mitochondrion                               | catalytic activity;nucleotide binding;transporter activity | 0.453 | 0.453 | 1.00 |
| P38626 | NADH-cytochrome b5 reductase 1 [OS=Saccharomyces cerevisiae S288c]                                | 854768 | CBR1; YIL043C          | metabolic process                                                                                                                     | endoplasmic reticulum;membrane;mitochondrion;nucleus | catalytic activity                                         | 0.957 | 0.957 | 1.00 |
| P53230 | Phosphatidate cytidyltransferase, mitochondrial [OS=Saccharomyces cerevisiae S288c]               | 852937 | TAM41; YGR046W         | metabolic process                                                                                                                     | membrane;mitochondrion;organelle lumen               | catalytic activity                                         | 0.668 | 0.668 | 1.00 |
| P27697 | Atypical kinase COQ8, mitochondrial [OS=Saccharomyces cerevisiae S288c]                           | 852758 | COQ8; YGL119W          | metabolic process                                                                                                                     | membrane;mitochondrion;organelle lumen               | catalytic activity;nucleotide binding                      | 0.453 | 0.453 | 1.00 |
| P47039 | Probable kynurenine--oxoglutarate transaminase BNA3 [OS=Saccharomyces cerevisiae S288c]           | 853386 | BNA3; YJL060W          | metabolic process;regulation of biological process                                                                                    | cytoplasm;mitochondrion                              | catalytic activity                                         | 0.468 | 0.468 | 1.00 |
| P25626 | 54S ribosomal protein IMG1, mitochondrial [OS=Saccharomyces cerevisiae S288c]                     | 850413 | IMG1; YCR046C          | cell organization and biogenesis;metabolic process                                                                                    | mitochondrion;ribosome                               | structural molecule activity                               | 1.031 | 1.031 | 1.00 |
| P53220 | Mitochondrial import inner membrane translocase subunit TIM21 [OS=Saccharomyces cerevisiae S288c] | 852921 | TIM21; YGR033C         | cell organization and biogenesis;transport                                                                                            | membrane;mitochondrion                               | protein binding                                            | 0.719 | 0.719 | 1.00 |
| P32939 | GTP-binding protein ypt7 [OS=Saccharomyces cerevisiae S288c]                                      | 855012 | YPT7; YML001W          | cell communication;cell organization and biogenesis;metabolic process;regulation of biological process;response to stimulus;transport | cytosol;endosome;membrane;mitochondrion;vacuole      | catalytic activity;nucleotide binding;protein binding      | 0.585 | 0.585 | 1.00 |
| P48360 | Probable NADPH:adrenodoxin oxidoreductase, mitochondrial [OS=Saccharomyces cerevisiae S288c]      | 851982 | ARH1; YDR376W          | cellular homeostasis;metabolic process;transport                                                                                      | cytoplasm;membrane;mitochondrion;organelle lumen     | catalytic activity                                         | 0.346 | 0.346 | 1.00 |
| P25270 | rRNA methyltransferase 1, mitochondrial [OS=Saccharomyces cerevisiae S288c]                       | 854376 | MRM1; YOR201C          | metabolic process                                                                                                                     | mitochondrion                                        | catalytic activity;RNA binding                             | 0.274 | 0.274 | 1.00 |
| P38172 | MIOREX complex component 3 [OS=Saccharomyces cerevisiae S288c]                                    | 852181 | YBL095W; MRX3; YBL095W |                                                                                                                                       | membrane;mitochondrion                               |                                                            | 0.501 | 0.501 | 1.00 |
| P09201 | fructose-1,6-bisphosphatase [OS=Saccharomyces cerevisiae S288c]                                   | 851092 | FBP1; YLR377C          | metabolic process                                                                                                                     | cytosol                                              | catalytic activity;metal ion binding                       | 0.274 | 0.274 | 1.00 |

|        |                                                                                                   |         |                        |                                                                                                                           |                                         |                                                             |        |        |      |
|--------|---------------------------------------------------------------------------------------------------|---------|------------------------|---------------------------------------------------------------------------------------------------------------------------|-----------------------------------------|-------------------------------------------------------------|--------|--------|------|
| Q06005 | Octanoyltransferase, mitochondrial [OS=Saccharomyces cerevisiae S288c]                            | 850940  | LIP2; YLR239C          | metabolic process                                                                                                         | cytoplasm;mitochondrion                 | catalytic activity                                          | 0.245  | 0.245  | 1.00 |
| Q06630 | Mitochondrial homologous recombination protein 1 [OS=Saccharomyces cerevisiae S288c]              | 851890  | MHR1; YDR296W          | cell organization and biogenesis;metabolic process;regulation of biological process;response to stimulus                  | mitochondrion                           | catalytic activity;DNA binding;structural molecule activity | 0.359  | 0.359  | 1.00 |
| P18409 | Mitochondrial distribution and morphology protein 10 [OS=Saccharomyces cerevisiae S288c]          | 851223  | MDM10; YAL010C         | cell organization and biogenesis;transport                                                                                | membrane;mitochondrion                  | protein binding                                             | 0.16   | 0.16   | 1.00 |
| P32378 | 4-hydroxybenzoate polyprenyltransferase, mitochondrial [OS=Saccharomyces cerevisiae S288c]        | 855778  | COQ2; YNR041C          | metabolic process;transport                                                                                               | membrane;mitochondrion                  | catalytic activity                                          | 0.292  | 0.292  | 1.00 |
| P32493 | ATPase expression protein 1, mitochondrial [OS=Saccharomyces cerevisiae S288c]                    | 855086  | AEP1; YMR064W          | regulation of biological process                                                                                          | mitochondrion                           | translation regulator activity                              | 0.15   | 0.15   | 1.00 |
| Q07821 | Iron-sulfur assembly protein 1 [OS=Saccharomyces cerevisiae S288c]                                | 850632  | ISA1; YLL027W          | cell organization and biogenesis;metabolic process                                                                        | mitochondrion;organelle lumen           | metal ion binding;structural molecule activity              | 0.136  | 0.136  | 1.00 |
| Q00402 | Nuclear migration protein NUM1 [OS=Saccharomyces cerevisiae S288c]                                | 851727  | NUM1; YDR150W          | cell organization and biogenesis;cellular component movement;metabolic process;regulation of biological process;transport | endoplasmic reticulum;mitochondrion     | catalytic activity;motor activity;protein binding           | 0.025  | 0.025  | 1.00 |
| P34231 | Uncharacterized protein YKL187C [OS=Saccharomyces cerevisiae S288c]                               | 853648  | FAT3; YKL187C; YKL187C | cell organization and biogenesis;transport                                                                                | membrane;mitochondrion                  |                                                             | 0.194  | 0.194  | 1.00 |
| P39515 | mitochondrial import inner membrane translocase subunit Tim17 [OS=Saccharomyces cerevisiae S288c] | 853298  | TIM17; YJL143W         | cell organization and biogenesis;transport                                                                                | membrane;mitochondrion                  | protein binding;transporter activity                        | 0.778  | 0.778  | 1.00 |
| P38884 | Altered inheritance of mitochondria protein 18, mitochondrial [OS=Saccharomyces cerevisiae S288c] | 856605  | AIM18; YHR198C         |                                                                                                                           | mitochondrion                           | catalytic activity                                          | 0.145  | 0.145  | 1.00 |
| Q2V2P9 | Uncharacterized protein YDR119W-A [OS=Saccharomyces cerevisiae S288c]                             | 3799970 | COX26; YDR119W-A       |                                                                                                                           | membrane;mitochondrion                  |                                                             | 1.154  | 1.154  | 1.00 |
| P32463 | Acyl carrier protein, mitochondrial [OS=Saccharomyces cerevisiae S288c]                           | 853642  | ACP1; YKL192C          | metabolic process;transport                                                                                               | mitochondrion                           |                                                             | 0.259  | 0.259  | 1.00 |
| P47158 | Putative transferase CAF17, mitochondrial [OS=Saccharomyces cerevisiae S288c]                     | 853586  | IBA57; YJR122W         | cell organization and biogenesis;metabolic process                                                                        | mitochondrion;organelle lumen           | catalytic activity                                          | 0.075  | 0.075  | 1.00 |
| P40051 | Intermediate cleaving peptidase 55 [OS=Saccharomyces cerevisiae S288c]                            | 856811  | ICP55; YER078C         | metabolic process;regulation of biological process                                                                        | membrane;mitochondrion                  | catalytic activity;metal ion binding                        | 0.077  | 0.077  | 1.00 |
| P38816 | thioredoxin reductase 2, mitochondrial [OS=Saccharomyces cerevisiae S288c]                        | 856506  | TRR2; YHR106W          | cellular homeostasis;metabolic process;regulation of biological process;response to stimulus                              | cytoplasm;mitochondrion                 | antioxidant activity;catalytic activity                     | 0.136  | 0.136  | 1.00 |
| Q06510 | Lysophosphatidylcholine acyltransferase [OS=Saccharomyces cerevisiae S288c]                       | 856262  | TAZ1; YPR140W          | cell organization and biogenesis;metabolic process;transport                                                              | membrane;mitochondrion                  | catalytic activity                                          | 0.093  | 0.093  | 1.00 |
| P04039 | Cytochrome c oxidase polypeptide VIII, mitochondrial [OS=Saccharomyces cerevisiae S288c]          | 851111  | COX8; YLR395C          | metabolic process;transport                                                                                               | membrane;mitochondrion                  | catalytic activity;transporter activity                     | 0.778  | 0.778  | 1.00 |
| P10174 | cytochrome c oxidase subunit 7 [OS=Saccharomyces cerevisiae S288c]                                | 855298  | COX7; YMR256C          | metabolic process;transport                                                                                               | membrane;mitochondrion                  | catalytic activity;transporter activity                     | 1.154  | 1.154  | 1.00 |
| P13433 | DNA-directed RNA polymerase, mitochondrial [OS=Saccharomyces cerevisiae S288c]                    | 850507  | RPO41; YFL036W         | cell organization and biogenesis;metabolic process                                                                        | cytoplasm;mitochondrion;organelle lumen | catalytic activity;DNA binding                              | 0.056  | 0.056  | 1.00 |
| Q05779 | Ubiquinone biosynthesis protein COQ9, mitochondrial [OS=Saccharomyces cerevisiae S288c]           | 850898  | COQ9; YLR201C          | metabolic process                                                                                                         | membrane;mitochondrion                  |                                                             | 0.166  | 0.166  | 1.00 |
| Q02863 | ubiquitin carboxyl-terminal hydrolase 16 [OS=Saccharomyces cerevisiae S288c]                      | 856032  | UBP16; YPL072W         | metabolic process                                                                                                         | membrane;mitochondrion                  | catalytic activity                                          | 0.072  | 0.072  | 1.00 |
| P04801 | Threonine--tRNA ligase, cytoplasmic [OS=Saccharomyces cerevisiae S288c]                           | 854732  | THS1; YIL078W          | metabolic process                                                                                                         | cytoplasm;mitochondrion                 | catalytic activity;nucleotide binding;RNA binding           | 0.05   | 0.05   | 1.00 |
| P09624 | Dihydropolyl dehydrogenase, mitochondrial [OS=Saccharomyces cerevisiae S288c]                     | 850527  | LPD1; YFL018C          | cellular homeostasis;metabolic process;regulation of biological process                                                   | mitochondrion;organelle lumen           | catalytic activity;nucleotide binding                       | 21.539 | 23.119 | 1.07 |

|        |                                                                                                                                              |        |                        |                                                                   |                                                  |                                                               |         |         |      |
|--------|----------------------------------------------------------------------------------------------------------------------------------------------|--------|------------------------|-------------------------------------------------------------------|--------------------------------------------------|---------------------------------------------------------------|---------|---------|------|
| P16547 | Mitochondrial outer membrane protein OM45 [OS=Saccharomyces cerevisiae S288c]                                                                | 854670 | OM45; YIL136W          |                                                                   | membrane;mitochondrion                           |                                                               | 250.189 | 274.423 | 1.10 |
| Q12466 | tricalbin-1 [OS=Saccharomyces cerevisiae S288c]                                                                                              | 854253 | TCB1; YOR086C          | cell organization and biogenesis;regulation of biological process | endoplasmic reticulum;membrane;mitochondrion     | metal ion binding;protein binding                             | 0.417   | 0.468   | 1.12 |
| P32332 | Mitochondrial oxaloacetate transport protein [OS=Saccharomyces cerevisiae S288c]                                                             | 853739 | OAC1; YKL120W          | metabolic process;transport                                       | membrane;mitochondrion                           | structural molecule activity;transporter activity             | 4.995   | 5.813   | 1.16 |
| Q12482 | Mitochondrial aspartate-glutamate transporter AGC1 [OS=Saccharomyces cerevisiae S288c]                                                       | 856132 | AGC1; YPR021C          | metabolic process;transport                                       | membrane;mitochondrion                           | structural molecule activity;transporter activity             | 0.348   | 0.407   | 1.17 |
| P00924 | Enolase 1 [OS=Saccharomyces cerevisiae S288c]                                                                                                | 853169 | ENO1; YGR254W          | metabolic process;regulation of biological process                | cytoplasm;cytosol;membrane;mitochondrion;vacuole | catalytic activity;metal ion binding;protein binding          | 0.848   | 0.995   | 1.17 |
| P12695 | Dihydrolipoyllysine-residue acetyltransferase component of pyruvate dehydrogenase complex, mitochondrial [OS=Saccharomyces cerevisiae S288c] | 855653 | LAT1; YNL071W          | metabolic process                                                 | mitochondrion;organelle lumen                    | catalytic activity                                            | 6.43    | 7.62    | 1.19 |
| P40035 | Mitochondrial phosphate carrier protein 2 [OS=Saccharomyces cerevisiae S288c]                                                                | 856779 | PIC2; YER053C          | cellular homeostasis;metabolic process;transport                  | membrane;mitochondrion                           | structural molecule activity;transporter activity             | 1.637   | 1.976   | 1.21 |
| Q12374 | Nuclear control of ATPase protein 2 [OS=Saccharomyces cerevisiae S288c]                                                                      | 856278 | NCA2; YPR155C          | metabolic process                                                 | membrane;mitochondrion                           |                                                               | 0.468   | 0.565   | 1.21 |
| Q07651 | SUR7 family protein FMP45 [OS=Saccharomyces cerevisiae S288c]                                                                                | 851304 | FMP45; YDL222C         | cell differentiation;cell organization and biogenesis             | membrane;mitochondrion                           |                                                               | 4.878   | 6.017   | 1.23 |
| Q01852 | Mitochondrial import inner membrane translocase subunit TIM44 [OS=Saccharomyces cerevisiae S288c]                                            | 854790 | TIM44; YIL022W         | transport                                                         | membrane;mitochondrion                           | nucleotide binding;protein binding                            | 3.758   | 4.946   | 1.32 |
| P33303 | Succinate/fumarate mitochondrial transporter [OS=Saccharomyces cerevisiae S288c]                                                             | 853558 | SFC1; YJR095W          | metabolic process;transport                                       | membrane;mitochondrion                           | structural molecule activity;transporter activity             | 9       | 11.915  | 1.32 |
| P25087 | Sterol 24-C-methyltransferase [OS=Saccharomyces cerevisiae S288c]                                                                            | 855003 | ERG6; YML008C          | metabolic process                                                 | endoplasmic reticulum;membrane;mitochondrion     | catalytic activity                                            | 1.424   | 1.894   | 1.33 |
| Q04013 | Citrate/oxoglutarate carrier protein [OS=Saccharomyces cerevisiae S288c]                                                                     | 855282 | YHM2; YMR241W          | cell organization and biogenesis;metabolic process;transport      | membrane;mitochondrion                           | DNA binding;structural molecule activity;transporter activity | 3.467   | 4.623   | 1.33 |
| P53292 | 37S ribosomal protein S35, mitochondrial [OS=Saccharomyces cerevisiae S288c]                                                                 | 853075 | MRPS35; YGR165W        | cell organization and biogenesis;metabolic process                | mitochondrion;ribosome                           | structural molecule activity                                  | 1.512   | 2.02    | 1.34 |
| P53266 | Cytochrome oxidase assembly protein SHY1 [OS=Saccharomyces cerevisiae S288c]                                                                 | 853009 | SHY1; YGR112W          | cell organization and biogenesis                                  | membrane;mitochondrion                           | protein binding                                               | 1.154   | 1.555   | 1.35 |
| P42900 | Sigma-like sequence protein 1, mitochondrial [OS=Saccharomyces cerevisiae S288c]                                                             | 850830 | SLS1; YLR139C          | cell organization and biogenesis;metabolic process                | membrane;mitochondrion                           | protein binding                                               | 0.194   | 0.266   | 1.37 |
| P54115 | Magnesium-activated aldehyde dehydrogenase, cytosolic [OS=Saccharomyces cerevisiae S288c]                                                    | 856044 | ALD6; YPL061W          | metabolic process;response to stimulus                            | cytoplasm;cytosol;mitochondrion                  | catalytic activity                                            | 0.25    | 0.346   | 1.38 |
| P20967 | 2-oxoglutarate dehydrogenase, mitochondrial [OS=Saccharomyces cerevisiae S288c]                                                              | 854681 | KGD1; YIL125W          | metabolic process                                                 | cytosol;mitochondrion;organelle lumen            | catalytic activity                                            | 11.426  | 15.843  | 1.39 |
| P53206 | putative cysteine synthase [OS=Saccharomyces cerevisiae S288c]                                                                               | 852895 | YGR012W; YGR012W       | metabolic process                                                 |                                                  | catalytic activity                                            | 0.817   | 1.154   | 1.41 |
| Q12289 | mitochondrial carnitine carrier [OS=Saccharomyces cerevisiae S288c]                                                                          | 854267 | CRC1; YOR100C          | metabolic process;transport                                       | membrane;mitochondrion                           | structural molecule activity;transporter activity             | 1.404   | 1.994   | 1.42 |
| P21771 | 37S ribosomal protein S28, mitochondrial [OS=Saccharomyces cerevisiae S288c]                                                                 | 851937 | MRPS28; YDR337W        | cell organization and biogenesis;metabolic process                | mitochondrion;ribosome                           | RNA binding;structural molecule activity                      | 0.438   | 0.624   | 1.42 |
| Q06567 | ABC1 family protein MCP2 [OS=Saccharomyces cerevisiae S288c]                                                                                 | 850955 | YLR253W; MCP2; YLR253W | cell organization and biogenesis                                  | membrane;mitochondrion                           |                                                               | 0.484   | 0.693   | 1.43 |
| P00890 | citrate synthase, mitochondrial [OS=Saccharomyces cerevisiae S288c]                                                                          | 855732 | CIT1; YNR001C          | metabolic process;transport                                       | cytosol;mitochondrion;organelle lumen            | catalytic activity                                            | 9       | 12.895  | 1.43 |

|        |                                                                                                             |        |                  |                                                                                               |                                                                |                                                                                     |         |         |      |
|--------|-------------------------------------------------------------------------------------------------------------|--------|------------------|-----------------------------------------------------------------------------------------------|----------------------------------------------------------------|-------------------------------------------------------------------------------------|---------|---------|------|
| P17558 | 37S ribosomal protein PET123, mitochondrial [OS=Saccharomyces cerevisiae S288c]                             | 854329 | PET123; YOR158W  | cell organization and biogenesis;metabolic process                                            | mitochondrion;ribosome                                         | structural molecule activity                                                        | 1.448   | 2.162   | 1.49 |
| P28241 | Isocitrate dehydrogenase [NAD] subunit 2, mitochondrial [OS=Saccharomyces cerevisiae S288c]                 | 854303 | IDH2; YOR136W    | metabolic process                                                                             | mitochondrion;organelle lumen                                  | catalytic activity;metal ion binding;nucleotide binding;protein binding;RNA binding | 3.642   | 5.449   | 1.50 |
| P18239 | ADP,ATP carrier protein 2 [OS=Saccharomyces cerevisiae S288c]                                               | 852250 | PET9; YBL030C    | cell death;metabolic process;transport                                                        | membrane;mitochondrion                                         | structural molecule activity;transporter activity                                   | 110.034 | 167.761 | 1.52 |
| P21801 | Succinate dehydrogenase [ubiquinone] iron-sulfur subunit, mitochondrial [OS=Saccharomyces cerevisiae S288c] | 850685 | SDH2; YLL041C    | metabolic process;transport                                                                   | membrane;mitochondrion                                         | catalytic activity;metal ion binding                                                | 18.684  | 28.552  | 1.53 |
| P24720 | Protein MNE1 [OS=Saccharomyces cerevisiae S288c]                                                            | 854532 | MNE1; YOR350C    | metabolic process                                                                             | cytoplasm;mitochondrion;organelle lumen                        |                                                                                     | 0.125   | 0.194   | 1.55 |
| P22438 | Methionine--tRNA ligase, mitochondrial [OS=Saccharomyces cerevisiae S288c]                                  | 853081 | MSM1; YGR171C    | metabolic process                                                                             | cytoplasm;cytosol;mitochondrion;organelle lumen                | catalytic activity;nucleotide binding                                               | 0.136   | 0.212   | 1.56 |
| P53721 | Respiratory supercomplex factor 2, mitochondrial [OS=Saccharomyces cerevisiae S288c]                        | 855752 | RCF2; YNR018W    | cell organization and biogenesis                                                              | membrane;mitochondrion                                         |                                                                                     | 5.579   | 9       | 1.61 |
| P14540 | fructose-bisphosphate aldolase [OS=Saccharomyces cerevisiae S288c]                                          | 853805 | FBA1; YKL060C    | metabolic process                                                                             | cytoplasm;cytosol;membrane;mitochondrion                       | catalytic activity;metal ion binding                                                | 0.896   | 1.448   | 1.62 |
| Q12375 | mitochondrial ornithine transporter 1 [OS=Saccharomyces cerevisiae S288c]                                   | 854297 | ORT1; YOR130C    | metabolic process;transport                                                                   | membrane;mitochondrion                                         | structural molecule activity;transporter activity                                   | 0.334   | 0.54    | 1.62 |
| P00942 | Triosephosphate isomerase [OS=Saccharomyces cerevisiae S288c]                                               | 851620 | TPI1; YDR050C    | metabolic process                                                                             | cytoplasm;cytosol;membrane;mitochondrion                       | catalytic activity                                                                  | 0.425   | 0.701   | 1.65 |
| P36526 | 54S ribosomal protein L27, mitochondrial [OS=Saccharomyces cerevisiae S288c]                                | 852585 | MRPL27; YBR282W  | cell organization and biogenesis;metabolic process                                            | mitochondrion;ribosome                                         | structural molecule activity                                                        | 0.585   | 0.995   | 1.70 |
| P40033 | 37S ribosomal protein rsm18, mitochondrial [OS=Saccharomyces cerevisiae S288c]                              | 856776 | RSM18; YER050C   | cell organization and biogenesis;metabolic process                                            | mitochondrion;ribosome                                         | structural molecule activity                                                        | 0.585   | 0.995   | 1.70 |
| Q02981 | ABC1 family protein YPL109C, mitochondrial [OS=Saccharomyces cerevisiae S288c]                              | 855995 | YPL109C; YPL109C |                                                                                               | mitochondrion                                                  |                                                                                     | 0.334   | 0.585   | 1.75 |
| P27929 | 37S ribosomal protein NAM9, mitochondrial [OS=Saccharomyces cerevisiae S288c]                               | 855585 | NAM9; YNL137C    | cell organization and biogenesis;metabolic process;regulation of biological process           | mitochondrion;ribosome                                         | RNA binding;structural molecule activity                                            | 1.062   | 1.865   | 1.76 |
| P19882 | heat shock protein 60, mitochondrial [OS=Saccharomyces cerevisiae S288c]                                    | 850963 | HSP60; YLR259C   | cell organization and biogenesis;metabolic process;regulation of biological process;transport | cytoplasm;cytosol;membrane;mitochondrion;organelle lumen       | catalytic activity;DNA binding;nucleotide binding;protein binding                   | 22.357  | 39.296  | 1.76 |
| P16603 | NADPH--cytochrome P450 reductase [OS=Saccharomyces cerevisiae S288c]                                        | 856438 | NCP1; YHR042W    | metabolic process                                                                             | cytoplasm;cytosol;endoplasmic reticulum;membrane;mitochondrion | catalytic activity;metal ion binding;nucleotide binding                             | 0.343   | 0.604   | 1.76 |
| P21375 | Fumarate reductase 2 [OS=Saccharomyces cerevisiae S288c]                                                    | 853510 | OSM1; YJR051W    | metabolic process                                                                             | endoplasmic reticulum;mitochondrion                            | catalytic activity;nucleotide binding                                               | 0.25    | 0.45    | 1.80 |
| P12687 | 54S ribosomal protein L2, mitochondrial [OS=Saccharomyces cerevisiae S288c]                                 | 855727 | MRP7; YNL005C    | cell organization and biogenesis;metabolic process                                            | mitochondrion;ribosome                                         | catalytic activity;RNA binding;structural molecule activity                         | 1.565   | 2.899   | 1.85 |
| P48237 | Mitochondrial group I intron splicing factor CCM1 [OS=Saccharomyces cerevisiae S288c]                       | 853053 | CCM1; YGR150C    | cell organization and biogenesis;metabolic process                                            | mitochondrion                                                  | RNA binding                                                                         | 0.044   | 0.089   | 2.02 |
| Q01802 | Aspartate aminotransferase, mitochondrial [OS=Saccharomyces cerevisiae S288c]                               | 853755 | AAT1; YKL106W    | metabolic process                                                                             | mitochondrion;organelle lumen                                  | catalytic activity;protein binding                                                  | 0.075   | 0.155   | 2.07 |
| P41911 | Glycerol-3-phosphate dehydrogenase [NAD(+)] 2, mitochondrial [OS=Saccharomyces cerevisiae S288c]            | 854095 | GPD2; YOL059W    | metabolic process                                                                             | cytoplasm;cytosol;mitochondrion                                | catalytic activity;nucleotide binding;protein binding                               | 0.089   | 0.186   | 2.09 |

|        |                                                                                     |        |                  |                                                                                                                    |                                                      |                                                                                |       |       |      |
|--------|-------------------------------------------------------------------------------------|--------|------------------|--------------------------------------------------------------------------------------------------------------------|------------------------------------------------------|--------------------------------------------------------------------------------|-------|-------|------|
| Q01163 | 37S ribosomal protein S23, mitochondrial [OS=Saccharomyces cerevisiae S288c]        | 852748 | RSM23; YGL129C   | cell organization and biogenesis;metabolic process                                                                 | mitochondrion;ribosome                               | catalytic activity;nucleotide binding;RNA binding;structural molecule activity | 0.983 | 2.065 | 2.10 |
| P32792 | UPF0744 protein YSC83 [OS=Saccharomyces cerevisiae S288c]                           | 856410 | YSC83; YHR017W   |                                                                                                                    | membrane;mitochondrion                               |                                                                                | 0.11  | 0.233 | 2.12 |
| P49954 | probable hydrolase NIT3 [OS=Saccharomyces cerevisiae S288c]                         | 851065 | NIT3; YLR351C    | metabolic process                                                                                                  | cytoplasm;mitochondrion                              | catalytic activity                                                             | 0.129 | 0.274 | 2.12 |
| P38297 | Mitofusin FZO1 [OS=Saccharomyces cerevisiae S288c]                                  | 852477 | FZO1; YBR179C    | cell organization and biogenesis                                                                                   | membrane;mitochondrion                               | catalytic activity;nucleotide binding;protein binding                          | 0.142 | 0.304 | 2.14 |
| Q08926 | ULP1-interacting protein 4 [OS=Saccharomyces cerevisiae S288c]                      | 855916 | UIP4; YPL186C    |                                                                                                                    | endoplasmic reticulum;membrane;mitochondrion;nucleus |                                                                                | 0.136 | 0.292 | 2.15 |
| P41921 | glutathione reductase [OS=Saccharomyces cerevisiae S288c]                           | 856014 | GLR1; YPL091W    | cellular homeostasis;metabolic process;regulation of biological process;response to stimulus                       | cytoplasm;cytosol;mitochondrion;nucleus              | antioxidant activity;catalytic activity;nucleotide binding                     | 0.155 | 0.334 | 2.15 |
| P12709 | glucose-6-phosphate isomerase [OS=Saccharomyces cerevisiae S288c]                   | 852495 | PGI1; YBR196C    | metabolic process                                                                                                  | cytoplasm;membrane;mitochondrion                     | catalytic activity                                                             | 0.166 | 0.359 | 2.16 |
| P53166 | ATP-dependent RNA helicase mrh4, mitochondrial [OS=Saccharomyces cerevisiae S288c]  | 852816 | MRH4; YGL064C    | cell organization and biogenesis;metabolic process                                                                 | mitochondrion;organelle lumen                        | catalytic activity;nucleotide binding;RNA binding                              | 0.225 | 0.501 | 2.23 |
| P50110 | Sorting assembly machinery 37 kDa subunit [OS=Saccharomyces cerevisiae S288c]       | 855082 | SAM37; YMR060C   | cell organization and biogenesis;transport                                                                         | membrane;mitochondrion                               | protein binding                                                                | 0.245 | 0.551 | 2.25 |
| P22136 | ATPase expression protein 2, mitochondrial [OS=Saccharomyces cerevisiae S288c]      | 855325 | AEP2; YMR282C    | metabolic process;regulation of biological process                                                                 | mitochondrion                                        | RNA binding                                                                    | 0.292 | 0.668 | 2.29 |
| P04803 | Tryptophan-tRNA ligase, mitochondrial [OS=Saccharomyces cerevisiae S288c]           | 851861 | MSW1; YDR268W    | metabolic process                                                                                                  | cytoplasm;mitochondrion;organelle lumen              | catalytic activity;nucleotide binding                                          | 0.292 | 0.668 | 2.29 |
| P40496 | 37S ribosomal protein S25, mitochondrial [OS=Saccharomyces cerevisiae S288c]        | 854715 | RSM25; YIL093C   | cell organization and biogenesis;metabolic process                                                                 | mitochondrion;ribosome                               | structural molecule activity                                                   | 0.292 | 0.668 | 2.29 |
| Q03430 | 37S ribosomal protein RSM28, mitochondrial [OS=Saccharomyces cerevisiae S288c]      | 852105 | RSM28; YDR494W   | cell organization and biogenesis;metabolic process                                                                 | mitochondrion;ribosome                               | structural molecule activity                                                   | 1.462 | 3.489 | 2.39 |
| P36520 | 54S ribosomal protein L10, mitochondrial [OS=Saccharomyces cerevisiae S288c]        | 855436 | MRPL10; YNL284C  | cell organization and biogenesis;metabolic process                                                                 | mitochondrion;ribosome                               | structural molecule activity                                                   | 0.551 | 1.404 | 2.55 |
| Q03653 | protein EFR3 [OS=Saccharomyces cerevisiae S288c]                                    | 855252 | EFR3; YMR212C    |                                                                                                                    | membrane;mitochondrion                               |                                                                                | 0.096 | 0.259 | 2.70 |
| P39952 | Mitochondrial inner membrane protein OXA1 [OS=Saccharomyces cerevisiae S288c]       | 856898 | OXA1; YER154W    | cell organization and biogenesis;transport                                                                         | membrane;mitochondrion                               | transporter activity                                                           | 1.371 | 3.87  | 2.82 |
| P38169 | Kynurenine 3-monooxygenase [OS=Saccharomyces cerevisiae S288c]                      | 852179 | BNA4; YBL098W    | metabolic process                                                                                                  | membrane;mitochondrion                               | catalytic activity;nucleotide binding                                          | 0.172 | 0.487 | 2.83 |
| Q03640 | Tricalbin-3 [OS=Saccharomyces cerevisiae S288c]                                     | 854903 | TCB3; YML072C    | cell organization and biogenesis;regulation of biological process                                                  | endoplasmic reticulum;membrane;mitochondrion         | metal ion binding;protein binding                                              | 0.283 | 0.806 | 2.85 |
| P36517 | 54S ribosomal protein L4, mitochondrial [OS=Saccharomyces cerevisiae S288c]         | 851160 | MRPL4; YLR439W   | cell organization and biogenesis;metabolic process                                                                 | mitochondrion;ribosome                               | structural molecule activity                                                   | 0.369 | 1.081 | 2.93 |
| Q12251 | Uncharacterized mitochondrial carrier YPR011C [OS=Saccharomyces cerevisiae S288c]   | 856121 | YPR011C; YPR011C | metabolic process;transport                                                                                        | membrane;mitochondrion                               | structural molecule activity;transporter activity                              | 0.245 | 0.73  | 2.98 |
| P28737 | Protein MSP1 [OS=Saccharomyces cerevisiae S288c]                                    | 852915 | MSP1; YGR028W    | cell organization and biogenesis;metabolic process;regulation of biological process;response to stimulus;transport | membrane;mitochondrion;nucleus                       | catalytic activity;nucleotide binding;protein binding;RNA binding              | 0.259 | 0.778 | 3.00 |
| P40015 | inositol phosphosphingolipids phospholipase C [OS=Saccharomyces cerevisiae S288c]   | 856739 | ISC1; YER019W    | metabolic process;response to stimulus                                                                             | endoplasmic reticulum;membrane;mitochondrion         | catalytic activity;metal ion binding                                           | 0.101 | 0.334 | 3.31 |
| Q03327 | Mitochondrial fusion and transport protein Ugo1 [OS=Saccharomyces cerevisiae S288c] | 852081 | UGO1; YDR470C    | cell organization and biogenesis;metabolic process                                                                 | membrane;mitochondrion                               | protein binding;structural molecule activity                                   | 0.425 | 1.424 | 3.35 |

|        |                                                                                                          |            |                   |                                                    |                                              |                                                   |       |       |      |
|--------|----------------------------------------------------------------------------------------------------------|------------|-------------------|----------------------------------------------------|----------------------------------------------|---------------------------------------------------|-------|-------|------|
| P25038 | Translation initiation factor IF-2, mitochondrial<br>[OS=Saccharomyces cerevisiae S288c]                 | 85413<br>5 | IFM1;<br>YOL023W  | cell organization and biogenesis;metabolic process | mitochondrion;nucleus                        | catalytic activity;nucleotide binding;RNA binding | 0.11  | 0.369 | 3.35 |
| Q12117 | Protein MRH1<br>[OS=Saccharomyces cerevisiae S288c]                                                      | 85159<br>7 | MRH1;<br>YDR033W  | transport                                          | endoplasmic reticulum;membrane;mitochondrion | transporter activity                              | 2.162 | 7.254 | 3.36 |
| P49334 | Mitochondrial import receptor subunit tom22<br>[OS=Saccharomyces cerevisiae S288c]                       | 85559<br>2 | TOM22;<br>YNL131W | cell organization and biogenesis;transport         | membrane;mitochondrion                       | protein binding;transporter activity              | 0.292 | 1.154 | 3.95 |
| P25578 | CDP-diacylglycerol-glycerol-3-phosphate 3-phosphatidyltransferase<br>[OS=Saccharomyces cerevisiae S288c] | 85035<br>2 | PGS1;<br>YCL004W  | metabolic process                                  | mitochondrion                                | catalytic activity;nucleotide binding             | 0.083 | 0.374 | 4.51 |

**Supplemental Table S12. The relative concentrations of proteins in mitochondria purified from WT or *ups2Δ* cells cultured without LCA.** Mitochondria were purified from WT or *ups2Δ* cells recovered on day 7 of cell culturing without LCA. Mass spectrometry-based identification and quantitation of proteins recovered in purified mitochondria were performed as described in Materials and methods. The exponentially modified protein abundance index (emPAI) provided by the "Proteome Discoverer" software was used to calculate the relative abundance of mitochondrial proteins between specified datasets. Data on the relative concentrations of mitochondrial proteins are presented as means of 2 independent experiments.

| Accession | Description                                                                                       | Entrez Gene ID | Gene ID          | Biological Process                                           | Cellular Component                              | Molecular Function                                                   | emPAI WT | emPAI <i>ups2</i> | Ratio <i>ups2</i> / WT |
|-----------|---------------------------------------------------------------------------------------------------|----------------|------------------|--------------------------------------------------------------|-------------------------------------------------|----------------------------------------------------------------------|----------|-------------------|------------------------|
| P38120    | 37S ribosomal protein S9, mitochondrial [OS=Saccharomyces cerevisiae S288c]                       | 852443         | MRPS9; YBR146W   | cell organization and biogenesis;metabolic process           | mitochondrion;ribosome                          | RNA binding;structural molecule activity                             | 3.437    | 0.145             | 0.04                   |
| P12687    | 54S ribosomal protein L2, mitochondrial [OS=Saccharomyces cerevisiae S288c]                       | 855727         | MRP7; YNL005C    | cell organization and biogenesis;metabolic process           | mitochondrion;ribosome                          | catalytic activity;RNA binding;structural molecule activity          | 1.848    | 0.11              | 0.06                   |
| P08525    | Cytochrome b-c1 complex subunit 8 [OS=Saccharomyces cerevisiae S288c]                             | 853273         | QCR8; YJL166W    | metabolic process;transport                                  | membrane;mitochondrion                          | catalytic activity;transporter activity                              | 5.31     | 0.585             | 0.11                   |
| P48527    | Tyrosine-tRNA ligase, mitochondrial [OS=Saccharomyces cerevisiae S288c]                           | 856007         | MSY1; YPL097W    | metabolic process                                            | cytoplasm;cytosol;mitochondrion;organelle lumen | catalytic activity;nucleotide binding;RNA binding                    | 0.63     | 0.072             | 0.11                   |
| Q03430    | 37S ribosomal protein RSM28, mitochondrial [OS=Saccharomyces cerevisiae S288c]                    | 852105         | RSM28; YDR494W   | cell organization and biogenesis;metabolic process           | mitochondrion;ribosome                          | structural molecule activity                                         | 3.062    | 0.35              | 0.11                   |
| P36141    | Putative redox protein fmp46, mitochondrial [OS=Saccharomyces cerevisiae S288c]                   | 853923         | FMP46; YKR049C   | metabolic process                                            | mitochondrion                                   | catalytic activity;protein binding                                   | 4.337    | 0.52              | 0.12                   |
| P38885    | Altered inheritance of mitochondria protein 46, mitochondrial [OS=Saccharomyces cerevisiae S288c] | 856606         | AIM46; YHR199C   | mitochondrion                                                |                                                 | catalytic activity                                                   | 1.994    | 0.245             | 0.12                   |
| P38797    | Protein phosphatase 2C homolog 7, mitochondrial [OS=Saccharomyces cerevisiae S288c]               | 856475         | PTC7; YHR076W    | metabolic process                                            | mitochondrion                                   | catalytic activity;metal ion binding;protein binding                 | 0.874    | 0.11              | 0.13                   |
| P25605    | Acetolactate synthase small subunit, mitochondrial [OS=Saccharomyces cerevisiae S288c]            | 850348         | ILV6; YCL009C    | metabolic process;regulation of biological process           | mitochondrion                                   | catalytic activity;enzyme regulator activity                         | 10.288   | 1.336             | 0.13                   |
| P40165    | NAD(P)H-hydrate epimerase [OS=Saccharomyces cerevisiae S288c]                                     | 855521         | YNL200C; YNL200C | metabolic process                                            | cytoplasm;mitochondrion                         | catalytic activity;metal ion binding;nucleotide binding              | 1.61     | 0.212             | 0.13                   |
| Q12349    | ATP synthase subunit H, mitochondrial [OS=Saccharomyces cerevisiae S288c]                         | 851002         | ATP14; YLR295C   | cell organization and biogenesis;metabolic process;transport | membrane;mitochondrion                          | catalytic activity;transporter activity                              | 2.728    | 0.389             | 0.14                   |
| P42847    | 37S ribosomal protein S18, mitochondrial [OS=Saccharomyces cerevisiae S288c]                      | 855410         | MRPS18; YNL306W  | cell organization and biogenesis;metabolic process           | mitochondrion;ribosome                          | RNA binding;structural molecule activity                             | 1.054    | 0.155             | 0.15                   |
| P00128    | Cytochrome b-c1 complex subunit 7 [OS=Saccharomyces cerevisiae S288c]                             | 852142         | QCR7; YDR529C    | cell organization and biogenesis;metabolic process;transport | membrane;mitochondrion                          | catalytic activity;transporter activity                              | 11.915   | 1.783             | 0.15                   |
| P81449    | ATP synthase subunit e, mitochondrial [OS=Saccharomyces cerevisiae S288c]                         | 851922         | TIM11; YDR322C-A | cell organization and biogenesis;metabolic process;transport | membrane;mitochondrion                          | catalytic activity;structural molecule activity;transporter activity | 9        | 1.371             | 0.15                   |
| P36521    | 54S ribosomal protein L11, mitochondrial [OS=Saccharomyces cerevisiae S288c]                      | 851325         | MRPL11; YDL202W  | cell organization and biogenesis;metabolic process           | mitochondrion;ribosome                          | structural molecule activity                                         | 0.833    | 0.129             | 0.15                   |
| P37267    | Assembly factor cbp4 [OS=Saccharomyces cerevisiae S288c]                                          |                | CBP4             | cell organization and biogenesis                             | membrane;mitochondrion                          |                                                                      | 3.329    | 0.52              | 0.16                   |
| P14908    | Mitochondrial transcription factor 1                                                              | 855268         | MTF1; YMR228W    | metabolic process;regulation of                              | mitochondrion;organelle lumen                   | catalytic activity;DNA                                               | 0.778    | 0.122             | 0.16                   |



|        |                                                                                                     |        |                  |                                                                                               |                                                         |                                                                                |        |        |      |
|--------|-----------------------------------------------------------------------------------------------------|--------|------------------|-----------------------------------------------------------------------------------------------|---------------------------------------------------------|--------------------------------------------------------------------------------|--------|--------|------|
|        | [OS=Saccharomyces cerevisiae S288c]                                                                 |        |                  | biological process                                                                            |                                                         | binding;RNA binding                                                            |        |        |      |
| Q02486 | ARS-binding factor 2, mitochondrial [OS=Saccharomyces cerevisiae S288c]                             | 855094 | ABF2; YMR072W    | cell organization and biogenesis;metabolic process;regulation of biological process           | chromosome;mitochondrion;nucleus                        | DNA binding                                                                    | 69.17  | 10.938 | 0.16 |
| P36520 | 54S ribosomal protein L10, mitochondrial [OS=Saccharomyces cerevisiae S288c]                        | 855436 | MRPL10; YNL284C  | cell organization and biogenesis;metabolic process                                            | mitochondrion;ribosome                                  | structural molecule activity                                                   | 0.73   | 0.116  | 0.16 |
| P40159 | Uncharacterized protein YNL208W [OS=Saccharomyces cerevisiae S288c]                                 | 855513 | YNL208W; YNL208W | membrane;mitochondrion;ribosome                                                               |                                                         |                                                                                | 1.783  | 0.292  | 0.16 |
| P19955 | 37S ribosomal protein YMR-31, mitochondrial [OS=Saccharomyces cerevisiae S288c]                     | 850610 | YMR31; YFR049W   | cell organization and biogenesis;metabolic process                                            | mitochondrion;ribosome                                  | catalytic activity;protein binding;structural molecule activity                | 15.681 | 2.594  | 0.17 |
| P36517 | 54S ribosomal protein L4, mitochondrial [OS=Saccharomyces cerevisiae S288c]                         | 851160 | MRPL4; YLR439W   | cell organization and biogenesis;metabolic process                                            | mitochondrion;ribosome                                  | structural molecule activity                                                   | 2.162  | 0.369  | 0.17 |
| P40502 | Altered inheritance of mitochondria protein 19, mitochondrial [OS=Saccharomyces cerevisiae S288c]   | 854722 | AIM19; YIL087C   | membrane;mitochondrion                                                                        |                                                         |                                                                                | 1.512  | 0.259  | 0.17 |
| P00045 | Cytochrome c iso-2 [OS=Saccharomyces cerevisiae S288c]                                              | 856672 | CYC7; YEL039C    | metabolic process;transport                                                                   | mitochondrion                                           | metal ion binding                                                              | 1.512  | 0.259  | 0.17 |
| P36526 | 54S ribosomal protein L27, mitochondrial [OS=Saccharomyces cerevisiae S288c]                        | 852585 | MRPL27; YBR282W  | cell organization and biogenesis;metabolic process                                            | mitochondrion;ribosome                                  | structural molecule activity                                                   | 1.512  | 0.259  | 0.17 |
| Q01163 | 37S ribosomal protein S23, mitochondrial [OS=Saccharomyces cerevisiae S288c]                        | 852748 | RSM23; YGL129C   | cell organization and biogenesis;metabolic process                                            | mitochondrion;ribosome                                  | catalytic activity;nucleotide binding;RNA binding;structural molecule activity | 4.367  | 0.751  | 0.17 |
| P51998 | 54S ribosomal protein yml6, mitochondrial [OS=Saccharomyces cerevisiae S288c]                       | 854983 | YML6; YML025C    | cell organization and biogenesis;metabolic process                                            | mitochondrion;ribosome                                  | RNA binding;structural molecule activity                                       | 1.404  | 0.245  | 0.17 |
| P32799 | Cytochrome c oxidase subunit 6A, mitochondrial [OS=Saccharomyces cerevisiae S288c]                  | 852684 | COX13; YGL191W   | cell organization and biogenesis;metabolic process;regulation of biological process;transport | membrane;mitochondrion                                  | catalytic activity;enzyme regulator activity;transporter activity              | 11.589 | 2.162  | 0.19 |
| P07253 | cytochrome B pre-mRNA-processing protein 6 [OS=Saccharomyces cerevisiae S288c]                      | 852417 | CBP6; YBR120C    | cell organization and biogenesis;metabolic process;regulation of biological process           | mitochondrion;ribosome                                  |                                                                                | 3.394  | 0.638  | 0.19 |
| P35180 | mitochondrial import receptor subunit Tom20 [OS=Saccharomyces cerevisiae S288c]                     | 852973 | TOM20; YGR082W   | cell organization and biogenesis;transport                                                    | membrane;mitochondrion                                  | protein binding;transporter activity                                           | 1.031  | 0.194  | 0.19 |
| P11914 | Mitochondrial-processing peptidase subunit alpha [OS=Saccharomyces cerevisiae S288c]                | 856419 | MAS2; YHR024C    | metabolic process;transport                                                                   | membrane;mitochondrion;organelle lumen                  | catalytic activity;metal ion binding;protein binding                           | 2.311  | 0.445  | 0.19 |
| P22353 | 54S ribosomal protein L8, mitochondrial [OS=Saccharomyces cerevisiae S288c]                         | 853382 | MRPL8; YJL063C   | cell organization and biogenesis;metabolic process                                            | mitochondrion;ribosome                                  | structural molecule activity                                                   | 0.848  | 0.166  | 0.20 |
| P21771 | 37S ribosomal protein S28, mitochondrial [OS=Saccharomyces cerevisiae S288c]                        | 851937 | MRPS28; YDR337W  | cell organization and biogenesis;metabolic process                                            | mitochondrion;ribosome                                  | RNA binding;structural molecule activity                                       | 0.624  | 0.129  | 0.21 |
| P02381 | Ribosomal protein VAR1, mitochondrial [OS=Saccharomyces cerevisiae S288c]                           | 854586 | VAR1; Q0140      | cell organization and biogenesis;metabolic process                                            | mitochondrion;ribosome                                  | structural molecule activity                                                   | 0.52   | 0.11   | 0.21 |
| Q08818 | Meiotic sister-chromatid recombination protein 6, mitochondrial [OS=Saccharomyces cerevisiae S288c] | 854536 | MSC6; YOR354C    | metabolic process                                                                             | mitochondrion;organelle lumen                           | RNA binding                                                                    | 1.047  | 0.227  | 0.22 |
| P39676 | Flavoheмоprotein [OS=Saccharomyces cerevisiae S288c]                                                | 853149 | YHB1; YGR234W    | metabolic process;response to stimulus                                                        | cytoplasm;cytosol;mitochondrion;nucleus;organelle lumen | catalytic activity;metal ion binding;protein binding                           | 4.179  | 0.931  | 0.22 |
| P53881 | 54S ribosomal protein L22, mitochondrial [OS=Saccharomyces cerevisiae S288c]                        | 855544 | MRPL22; YNL177C  | cell organization and biogenesis;metabolic process                                            | mitochondrion;ribosome                                  | RNA binding;structural molecule activity                                       | 1.683  | 0.389  | 0.23 |

|        |                                                                                                    |        |                         |                                                                                                                               |                                                      |                                                                           |       |       |      |
|--------|----------------------------------------------------------------------------------------------------|--------|-------------------------|-------------------------------------------------------------------------------------------------------------------------------|------------------------------------------------------|---------------------------------------------------------------------------|-------|-------|------|
| P28817 | 3-hydroxyisobutyryl-CoA hydrolase, mitochondrial [OS=Saccharomyces cerevisiae S288c]               | 851606 | EHD3; YDR036C           | metabolic process                                                                                                             | mitochondrion                                        | catalytic activity                                                        | 0.743 | 0.172 | 0.23 |
| Q04728 | Arginine biosynthesis bifunctional protein ArgJ, mitochondrial [OS=Saccharomyces cerevisiae S288c] | 855084 | ARG7; YMR062C           | metabolic process                                                                                                             | mitochondrion;organelle lumen                        | catalytic activity                                                        | 0.63  | 0.15  | 0.24 |
| P38323 | ATP-dependent clpX-like chaperone, mitochondrial [OS=Saccharomyces cerevisiae S288c]               | 852528 | MCX1; YBR227C           | metabolic process                                                                                                             | membrane;mitochondrion;organelle lumen               | catalytic activity;nucleotide binding                                     | 0.607 | 0.145 | 0.24 |
| P32897 | Mitochondrial import inner membrane translocase subunit tim23 [OS=Saccharomyces cerevisiae S288c]  | 855751 | TIM23; YNR017W          | transport                                                                                                                     | membrane;mitochondrion                               | protein binding;transporter activity                                      | 4.012 | 0.995 | 0.25 |
| P38088 | Glycine--tRNA ligase 1, mitochondrial [OS=Saccharomyces cerevisiae S288c]                          |        | GRS1                    | metabolic process                                                                                                             | cytoplasm;mitochondrion;organelle lumen              | catalytic activity;nucleotide binding;protein binding                     | 0.616 | 0.155 | 0.25 |
| P23833 | Protein SCO1, mitochondrial [OS=Saccharomyces cerevisiae S288c]                                    | 852325 | SCO1; YBR037C           | cell organization and biogenesis;cellular homeostasis;response to stimulus;transport                                          | membrane;mitochondrion                               | antioxidant activity;catalytic activity;metal ion binding                 | 1.154 | 0.292 | 0.25 |
| P38771 | Ribosome-recycling factor, mitochondrial [OS=Saccharomyces cerevisiae S288c]                       | 856433 | RRF1; YHR038W           | cell organization and biogenesis;metabolic process                                                                            | mitochondrion                                        | RNA binding                                                               | 1.955 | 0.501 | 0.26 |
| P17558 | 37S ribosomal protein PET123, mitochondrial [OS=Saccharomyces cerevisiae S288c]                    | 854329 | PET123; YOR158W         | cell organization and biogenesis;metabolic process                                                                            | mitochondrion;ribosome                               | structural molecule activity                                              | 2.594 | 0.668 | 0.26 |
| P40581 | peroxiredoxin HYR1 [OS=Saccharomyces cerevisiae S288c]                                             | 854855 | HYR1; YIR037W           | metabolic process;response to stimulus                                                                                        | cytoplasm;cytosol;mitochondrion;organelle lumen      | antioxidant activity;catalytic activity                                   | 0.995 | 0.259 | 0.26 |
| P17695 | Glutaredoxin-2, mitochondrial [OS=Saccharomyces cerevisiae S288c]                                  | 852124 | GRX2; YDR513W           | cellular homeostasis;metabolic process;regulation of biological process;response to stimulus;transport                        | cytoplasm;cytosol;mitochondrion;nucleus              | antioxidant activity;catalytic activity                                   | 0.874 | 0.233 | 0.27 |
| P00927 | Threonine dehydratase, mitochondrial [OS=Saccharomyces cerevisiae S288c]                           | 856819 | ILV1; YER086W           | metabolic process                                                                                                             | cytoplasm;mitochondrion                              | catalytic activity                                                        | 2.257 | 0.604 | 0.27 |
| P32860 | NifU-like protein, mitochondrial [OS=Saccharomyces cerevisiae S288c]                               | 853826 | NFU1; YKL040C           | cell organization and biogenesis;cellular homeostasis;metabolic process                                                       | mitochondrion;organelle lumen                        | metal ion binding                                                         | 3.87  | 1.054 | 0.27 |
| Q05892 | MIOREX complex component 2 [OS=Saccharomyces cerevisiae S288c]                                     | 850997 | YLR290C; COQ11; YLR290C | metabolic process                                                                                                             | mitochondrion                                        | catalytic activity                                                        | 3.87  | 1.054 | 0.27 |
| P40513 | Mitochondrial acidic protein MAM33 [OS=Saccharomyces cerevisiae S288c]                             | 854740 | MAM33; YIL070C          | metabolic process;regulation of biological process                                                                            | mitochondrion;organelle lumen                        | translation regulator activity                                            | 2.831 | 0.778 | 0.27 |
| P00427 | Cytochrome c oxidase subunit 6, mitochondrial [OS=Saccharomyces cerevisiae S288c]                  | 856448 | COX6; YHR051W           | metabolic process;transport                                                                                                   | membrane;mitochondrion                               | catalytic activity;metal ion binding;transporter activity                 | 2.831 | 0.778 | 0.27 |
| P00445 | Superoxide dismutase [Cu-Zn] [OS=Saccharomyces cerevisiae S288c]                                   | 853568 | SOD1; YJR104C           | cell organization and biogenesis;cellular homeostasis;metabolic process;regulation of biological process;response to stimulus | cytoplasm;cytosol;mitochondrion;nucleus              | antioxidant activity;catalytic activity;metal ion binding;protein binding | 1.848 | 0.52  | 0.28 |
| P42900 | Sigma-like sequence protein 1, mitochondrial [OS=Saccharomyces cerevisiae S288c]                   | 850830 | SLS1; YLR139C           | cell organization and biogenesis;metabolic process                                                                            | membrane;mitochondrion                               | protein binding                                                           | 0.425 | 0.125 | 0.29 |
| P40582 | Glutathione S-transferase 1 [OS=Saccharomyces cerevisiae S288c]                                    | 854856 | GTT1; YIR038C           | metabolic process                                                                                                             | endoplasmic reticulum;membrane;mitochondrion;nucleus | antioxidant activity;catalytic activity;protein binding;RNA binding       | 2.162 | 0.638 | 0.30 |
| P41911 | Glycerol-3-phosphate dehydrogenase [NAD(+)] 2, mitochondrial [OS=Saccharomyces cerevisiae S288c]   | 854095 | GPD2; YOL059W           | metabolic process                                                                                                             | cytoplasm;cytosol;mitochondrion                      | catalytic activity;nucleotide binding;protein binding                     | 0.292 | 0.089 | 0.30 |
| P38169 | Kynurenine 3-monoxygenase [OS=Saccharomyces                                                        | 852179 | BNA4; YBL098W           | metabolic process                                                                                                             | membrane;mitochondrion                               | catalytic activity;nucleotide binding                                     | 0.269 | 0.083 | 0.31 |

|        |                                                                                                                    |        |                       |                                                                                     |                               |                                                                         |        |        |      |
|--------|--------------------------------------------------------------------------------------------------------------------|--------|-----------------------|-------------------------------------------------------------------------------------|-------------------------------|-------------------------------------------------------------------------|--------|--------|------|
|        | cerevisiae S288c]                                                                                                  |        |                       |                                                                                     |                               |                                                                         |        |        |      |
| Q03557 | Glutamyl-tRNA(Gln) amidotransferase subunit A, mitochondrial [OS=Saccharomyces cerevisiae S288c]                   | 855338 | HER2; YMR293C         | cell organization and biogenesis;metabolic process                                  | mitochondrion                 | catalytic activity;nucleotide binding                                   | 0.259  | 0.08   | 0.31 |
| Q02863 | ubiquitin carboxyl-terminal hydrolase 16 [OS=Saccharomyces cerevisiae S288c]                                       | 856032 | UBP16; YPL072W        | metabolic process                                                                   | membrane;mitochondrion        | catalytic activity                                                      | 0.233  | 0.072  | 0.31 |
| P37298 | Succinate dehydrogenase [ubiquinone] cytochrome b small subunit, mitochondrial [OS=Saccharomyces cerevisiae S288c] | 851758 | SDH4; YDR178W         | metabolic process;transport                                                         | membrane;mitochondrion        | catalytic activity;metal ion binding                                    | 3.642  | 1.154  | 0.32 |
| P36066 | Protein MRG3-like [OS=Saccharomyces cerevisiae S288c]                                                              | 853725 | YKL133C; YKL133C      | metabolic process                                                                   | membrane;mitochondrion        | protein binding                                                         | 1.054  | 0.334  | 0.32 |
| P50945 | MICOS complex subunit MIC27 [OS=Saccharomyces cerevisiae S288c]                                                    | 855623 | AIM37; MIC27; YNL100W | cell organization and biogenesis                                                    | membrane;mitochondrion        |                                                                         | 0.968  | 0.311  | 0.32 |
| P27929 | 37S ribosomal protein NAM9, mitochondrial [OS=Saccharomyces cerevisiae S288c]                                      | 855585 | NAM9; YNL137C         | cell organization and biogenesis;metabolic process;regulation of biological process | mitochondrion;ribosome        | RNA binding;structural molecule activity                                | 1.202  | 0.389  | 0.32 |
| P32787 | Mitochondrial genome maintenance protein MGM101 [OS=Saccharomyces cerevisiae S288c]                                | 853609 | MGM101; YJR144W       | cell organization and biogenesis;metabolic process;response to stimulus             | chromosome;mitochondrion      | DNA binding                                                             | 3.281  | 1.069  | 0.33 |
| P04037 | cytochrome c oxidase subunit 4, mitochondrial [OS=Saccharomyces cerevisiae S288c]                                  | 852688 | COX4; YGL187C         | cell organization and biogenesis;metabolic process;transport                        | membrane;mitochondrion        | catalytic activity;metal ion binding;transporter activity               | 27.48  | 9      | 0.33 |
| P36151 | Uncharacterized protein YKR070W [OS=Saccharomyces cerevisiae S288c]                                                | 853944 | YKR070W; YKR070W      | metabolic process                                                                   | mitochondrion                 |                                                                         | 1.336  | 0.438  | 0.33 |
| P15424 | ATP-dependent RNA helicase MS5116, mitochondrial [OS=Saccharomyces cerevisiae S288c]                               | 851775 | MSS116; YDR194C       | metabolic process;regulation of biological process                                  | mitochondrion;organelle lumen | catalytic activity;nucleotide binding;RNA binding                       | 1.783  | 0.585  | 0.33 |
| Q06892 | NADH kinase POS5, mitochondrial [OS=Saccharomyces cerevisiae S288c]                                                | 855913 | POS5; YPL188W         | metabolic process;response to stimulus                                              | mitochondrion;organelle lumen | catalytic activity;nucleotide binding                                   | 1.565  | 0.52   | 0.33 |
| P12686 | 37S ribosomal protein MRP13, mitochondrial [OS=Saccharomyces cerevisiae S288c]                                     | 852975 | MRP13; YGR084C        | cell organization and biogenesis;metabolic process                                  | mitochondrion;ribosome        | structural molecule activity                                            | 0.778  | 0.259  | 0.33 |
| P38300 | Inner membrane mitoribosome receptor MBA1, mitochondrial [OS=Saccharomyces cerevisiae S288c]                       | 852483 | MBA1; YBR185C         | cell organization and biogenesis;regulation of biological process                   | membrane;mitochondrion        |                                                                         | 0.778  | 0.259  | 0.33 |
| P39525 | 3-oxoacyl-[acyl-carrier-protein] synthase homolog [OS=Saccharomyces cerevisiae S288c]                              | 856790 | CEM1; YER061C         | metabolic process                                                                   | mitochondrion                 | catalytic activity                                                      | 1.081  | 0.369  | 0.34 |
| Q06678 | 54S ribosomal protein L35, mitochondrial [OS=Saccharomyces cerevisiae S288c]                                       | 851921 | MRPL35; YDR322W       | cell organization and biogenesis;metabolic process                                  | mitochondrion;ribosome        | structural molecule activity                                            | 1.219  | 0.425  | 0.35 |
| P32902 | 37S ribosomal protein MRP4, mitochondrial [OS=Saccharomyces cerevisiae S288c]                                      | 856384 | MRP4; YHL004W         | cell organization and biogenesis;metabolic process                                  | mitochondrion;ribosome        | structural molecule activity                                            | 0.957  | 0.334  | 0.35 |
| P21954 | Isocitrate dehydrogenase [NADP], mitochondrial [OS=Saccharomyces cerevisiae S288c]                                 | 851493 | IDP1; YDL066W         | metabolic process                                                                   | mitochondrion                 | catalytic activity;metal ion binding;nucleotide binding;protein binding | 33.145 | 11.589 | 0.35 |
| P25719 | Peptidyl-prolyl cis-trans isomerase C, mitochondrial [OS=Saccharomyces cerevisiae S288c]                           | 854897 | CPR3; YML078W         | cell death;metabolic process                                                        | mitochondrion;organelle lumen | catalytic activity                                                      | 2.415  | 0.848  | 0.35 |
| P25374 | Cysteine desulfurase, mitochondrial [OS=Saccharomyces cerevisiae S288c]                                            | 850343 | NFS1; YCL017C         | cell organization and biogenesis;cellular homeostasis;metabolic process             | mitochondrion;nucleus         | catalytic activity;metal ion binding;protein binding                    | 2.3    | 0.817  | 0.36 |

|        |                                                                                                  |        |                  |                                                                                                          |                                                 |                                                             |         |        |      |
|--------|--------------------------------------------------------------------------------------------------|--------|------------------|----------------------------------------------------------------------------------------------------------|-------------------------------------------------|-------------------------------------------------------------|---------|--------|------|
| P36516 | 54S ribosomal protein L3, mitochondrial [OS=Saccharomyces cerevisiae S288c]                      | 855039 | MRPL3; YMR024W   | cell organization and biogenesis;metabolic process;response to stimulus                                  | mitochondrion;nucleus;ribosome                  | catalytic activity;RNA binding;structural molecule activity | 1.043   | 0.374  | 0.36 |
| P43567 | alanine--glyoxylate aminotransferase 1 [OS=Saccharomyces cerevisiae S288c]                       | 850514 | AGX1; YFL030W    | metabolic process                                                                                        | cytosol;mitochondrion                           | catalytic activity                                          | 2.162   | 0.778  | 0.36 |
| P21306 | ATP synthase subunit epsilon, mitochondrial [OS=Saccharomyces cerevisiae S288c]                  | 855857 | ATP15; YPL271W   | metabolic process;transport                                                                              | membrane;mitochondrion                          | catalytic activity;transporter activity                     | 2.162   | 0.778  | 0.36 |
| P02992 | elongation factor Tu, mitochondrial [OS=Saccharomyces cerevisiae S288c]                          | 854359 | TUF1; YOR187W    | cell organization and biogenesis;metabolic process                                                       | mitochondrion                                   | catalytic activity;nucleotide binding;RNA binding           | 12.043  | 4.38   | 0.36 |
| P38969 | Pentamidine resistance factor, mitochondrial [OS=Saccharomyces cerevisiae S288c]                 | 854440 | PNT1; YOR266W    | cell organization and biogenesis;response to stimulus                                                    | membrane;mitochondrion                          |                                                             | 0.711   | 0.259  | 0.36 |
| P18900 | hexaprenyl pyrophosphate synthase, mitochondrial [OS=Saccharomyces cerevisiae S288c]             | 852288 | COQ1; YBR003W    | metabolic process                                                                                        | membrane;mitochondrion                          | catalytic activity;metal ion binding;protein binding        | 0.711   | 0.259  | 0.36 |
| P32898 | Mitochondrial presequence protease [OS=Saccharomyces cerevisiae S288c]                           | 852041 | CYM1; YDR430C    | metabolic process                                                                                        | mitochondrion                                   | catalytic activity;metal ion binding                        | 0.812   | 0.297  | 0.37 |
| P25038 | Translation initiation factor IF-2, mitochondrial [OS=Saccharomyces cerevisiae S288c]            | 854135 | IFM1; YOL023W    | cell organization and biogenesis;metabolic process                                                       | mitochondrion;nucleus                           | catalytic activity;nucleotide binding;RNA binding           | 0.299   | 0.11   | 0.37 |
| P33416 | Heat shock protein 78, mitochondrial [OS=Saccharomyces cerevisiae S288c]                         | 851845 | HSP78; YDR258C   | cell organization and biogenesis;metabolic process;regulation of biological process;response to stimulus | mitochondrion;organelle lumen                   | catalytic activity;nucleotide binding;protein binding       | 4.264   | 1.569  | 0.37 |
| Q04935 | Cytochrome c oxidase protein 20, mitochondrial [OS=Saccharomyces cerevisiae S288c]               | 851817 | COX20; YDR231C   | cell organization and biogenesis;metabolic process                                                       | membrane;mitochondrion                          | protein binding                                             | 1.894   | 0.701  | 0.37 |
| P32445 | Single-stranded DNA-binding protein RIM1, mitochondrial [OS=Saccharomyces cerevisiae S288c]      | 850395 | RIM1; YCR028C-A  | cell organization and biogenesis;metabolic process;regulation of biological process                      | mitochondrion                                   | DNA binding                                                 | 1.783   | 0.668  | 0.37 |
| P00044 | Cytochrome c iso-1 [OS=Saccharomyces cerevisiae S288c]                                           | 853507 | CYC1; YJR048W    | metabolic process;transport                                                                              | mitochondrion                                   | metal ion binding;protein binding                           | 12.335  | 4.623  | 0.37 |
| P07806 | Valine--tRNA ligase, mitochondrial [OS=Saccharomyces cerevisiae S288c]                           | 852986 | VAS1; YGR094W    | metabolic process;regulation of biological process                                                       | cytoplasm;cytosol;mitochondrion                 | catalytic activity;nucleotide binding                       | 0.668   | 0.251  | 0.38 |
| Q08968 | UPF0061 protein FMP40 [OS=Saccharomyces cerevisiae S288c]                                        | 855879 | FMP40; YPL222W   | mitochondrion                                                                                            |                                                 | protein binding                                             | 2.162   | 0.823  | 0.38 |
| P40053 | Altered inheritance of mitochondria protein 9, mitochondrial [OS=Saccharomyces cerevisiae S288c] | 856813 | AIM9; YER080W    | mitochondrion                                                                                            |                                                 |                                                             | 4.036   | 1.537  | 0.38 |
| P53326 | Uncharacterized protein YGR266W [OS=Saccharomyces cerevisiae S288c]                              | 853182 | YGR266W; YGR266W | membrane;mitochondrion                                                                                   |                                                 |                                                             | 0.778   | 0.299  | 0.38 |
| P39726 | Glycine cleavage system H protein, mitochondrial [OS=Saccharomyces cerevisiae S288c]             | 851254 | GCV3; YAL044C    | metabolic process                                                                                        | mitochondrion                                   | catalytic activity                                          | 6.743   | 2.594  | 0.38 |
| P08417 | fumarate hydratase, mitochondrial [OS=Saccharomyces cerevisiae S288c]                            | 855866 | FUM1; YPL262W    | cell organization and biogenesis;metabolic process                                                       | cytoplasm;cytosol;mitochondrion;organelle lumen | catalytic activity                                          | 8.237   | 3.175  | 0.39 |
| P32453 | Protein ATP11, mitochondrial [OS=Saccharomyces cerevisiae S288c]                                 | 855401 | ATP11; YNL315C   | cell organization and biogenesis                                                                         | mitochondrion                                   | protein binding                                             | 1.512   | 0.585  | 0.39 |
| Q03713 | Respiratory supercomplex factor 1, mitochondrial [OS=Saccharomyces cerevisiae S288c]             | 854978 | RCF1; YML030W    | cell organization and biogenesis                                                                         | membrane;mitochondrion                          |                                                             | 1.512   | 0.585  | 0.39 |
| P50088 | Stationary phase gene 1 protein [OS=Saccharomyces cerevisiae S288c]                              | 853151 | SPG1; YGR236C    | endoplasmic reticulum;membrane;mitochondrion                                                             |                                                 |                                                             | 157.489 | 62.096 | 0.39 |

|        |                                                                                                       |        |                        |                                                                         |                                         |                                                                           |        |       |      |
|--------|-------------------------------------------------------------------------------------------------------|--------|------------------------|-------------------------------------------------------------------------|-----------------------------------------|---------------------------------------------------------------------------|--------|-------|------|
| P37292 | Serine hydroxymethyltransferase, mitochondrial [OS=Saccharomyces cerevisiae S288c]                    | 852565 | SHM1; YBR263W          | metabolic process                                                       | mitochondrion                           | catalytic activity                                                        | 7.697  | 3.037 | 0.39 |
| P40452 | Cytochrome c oxidase assembly factor 1 [OS=Saccharomyces cerevisiae S288c]                            | 854649 | COA1; YIL157C          | cell organization and biogenesis                                        | membrane;mitochondrion                  | protein binding                                                           | 1.31   | 0.52  | 0.40 |
| P39522 | Dihydroxy-acid dehydratase, mitochondrial [OS=Saccharomyces cerevisiae S288c]                         | 853473 | ILV3; YJR016C          | metabolic process                                                       | mitochondrion                           | catalytic activity;metal ion binding                                      | 16.475 | 6.565 | 0.40 |
| P40496 | 37S ribosomal protein S25, mitochondrial [OS=Saccharomyces cerevisiae S288c]                          | 854715 | RSM25; YIL093C         | cell organization and biogenesis;metabolic process                      | mitochondrion;ribosome                  | structural molecule activity                                              | 1.154  | 0.468 | 0.41 |
| P53311 | Mitochondrial pyruvate carrier 3 [OS=Saccharomyces cerevisiae S288c]                                  | 853158 | FMP43; MPC3; YGR243W   | transport                                                               | membrane;mitochondrion                  | transporter activity                                                      | 1.154  | 0.468 | 0.41 |
| Q12032 | Altered inheritance of mitochondria protein 41, mitochondrial [OS=Saccharomyces cerevisiae S288c]     | 854390 | AIM41; YOR215C         | mitochondrion                                                           |                                         | catalytic activity                                                        | 1.154  | 0.468 | 0.41 |
| P48569 | Uncharacterized protein YDL183C [OS=Saccharomyces cerevisiae S288c]                                   | 851345 | YDL183C; YDL183C       | transport                                                               |                                         |                                                                           | 1.069  | 0.438 | 0.41 |
| P36163 | mitochondrial metalloendopeptidase OMA1 [OS=Saccharomyces cerevisiae S288c]                           | 853962 | OMA1; YKR087C          | metabolic process                                                       | membrane;mitochondrion                  | catalytic activity;metal ion binding                                      | 0.931  | 0.389 | 0.42 |
| Q03246 | 37S ribosomal protein S17, mitochondrial [OS=Saccharomyces cerevisiae S288c]                          | 855226 | MRPS17; YMR188C        | cell differentiation;cell organization and biogenesis;metabolic process | mitochondrion;ribosome                  | RNA binding;structural molecule activity                                  | 0.931  | 0.389 | 0.42 |
| P00431 | cytochrome c peroxidase, mitochondrial [OS=Saccharomyces cerevisiae S288c]                            | 853940 | CCP1; YKR066C          | metabolic process;response to stimulus                                  | mitochondrion;organelle lumen           | antioxidant activity;catalytic activity;metal ion binding;protein binding | 1.649  | 0.701 | 0.43 |
| P16451 | Pyruvate dehydrogenase complex protein X component, mitochondrial [OS=Saccharomyces cerevisiae S288c] | 853107 | PDX1; YGR193C          | metabolic process                                                       | mitochondrion;organelle lumen           | catalytic activity;structural molecule activity                           | 2.3    | 0.978 | 0.43 |
| Q02204 | 54S ribosomal protein L13, mitochondrial [OS=Saccharomyces cerevisiae S288c]                          | 853875 | MRPL13; YKR006C        | cell organization and biogenesis;metabolic process                      | mitochondrion;ribosome                  | structural molecule activity                                              | 0.778  | 0.334 | 0.43 |
| P46998 | mitochondrial membrane protein FMP33 [OS=Saccharomyces cerevisiae S288c]                              | 853279 | FMP33; YJL161W         | membrane;mitochondrion                                                  |                                         |                                                                           | 0.778  | 0.334 | 0.43 |
| Q07914 | mitochondrial import inner membrane translocase subunit TIM14 [OS=Saccharomyces cerevisiae S288c]     | 850694 | PAM18; YLR008C         | regulation of biological process;transport                              | membrane;mitochondrion                  | enzyme regulator activity;protein binding;transporter activity            | 0.778  | 0.334 | 0.43 |
| P40185 | Protein mmf1, mitochondrial [OS=Saccharomyces cerevisiae S288c]                                       | 854760 | MMF1; YIL051C          | cell organization and biogenesis;metabolic process                      | mitochondrion;organelle lumen           |                                                                           | 6.943  | 2.981 | 0.43 |
| P38172 | MIOREX complex component 3 [OS=Saccharomyces cerevisiae S288c]                                        | 852181 | YBL095W; MRX3; YBL095W | membrane;mitochondrion                                                  |                                         |                                                                           | 0.719  | 0.311 | 0.43 |
| P53220 | Mitochondrial import inner membrane translocase subunit TIM21 [OS=Saccharomyces cerevisiae S288c]     | 852921 | TIM21; YGR033C         | cell organization and biogenesis;transport                              | membrane;mitochondrion                  | protein binding                                                           | 0.719  | 0.311 | 0.43 |
| P15179 | Aspartate--tRNA ligase, mitochondrial [OS=Saccharomyces cerevisiae S288c]                             | 856000 | MSD1; YPL104W          | metabolic process                                                       | cytoplasm;mitochondrion;organelle lumen | catalytic activity;nucleotide binding                                     | 0.708  | 0.307 | 0.43 |
| P30902 | ATP synthase subunit d, mitochondrial [OS=Saccharomyces cerevisiae S288c]                             | 853853 | ATP7; YKL016C          | metabolic process;transport                                             | membrane;mitochondrion                  | catalytic activity;transporter activity                                   | 6.197  | 2.728 | 0.44 |
| P46681 | D-lactate dehydrogenase [cytochrome] 2,                                                               | 851376 | DLD2; YDL178W          | metabolic process                                                       | mitochondrion;organelle lumen           | catalytic activity;nucleoti                                               | 1.264  | 0.562 | 0.44 |

|        |                                                                                                      |        |                        |                                                                                                          |                                          |                                                                                        |       |       |      |
|--------|------------------------------------------------------------------------------------------------------|--------|------------------------|----------------------------------------------------------------------------------------------------------|------------------------------------------|----------------------------------------------------------------------------------------|-------|-------|------|
|        | mitochondrial<br>[OS=Saccharomyces cerevisiae S288c]                                                 |        |                        |                                                                                                          |                                          | de binding;protein binding                                                             |       |       |      |
| P38152 | Tricarboxylate transport protein<br>[OS=Saccharomyces cerevisiae S288c]                              | 852594 | CTP1; YBR291C          | metabolic process;transport                                                                              | membrane;mitochondrion                   | structural molecule activity;transporter activity                                      | 0.551 | 0.245 | 0.44 |
| P36528 | 54S ribosomal protein L17, mitochondrial<br>[OS=Saccharomyces cerevisiae S288c]                      | 855469 | MRPL17; YNL252C        | cell organization and biogenesis;metabolic process                                                       | mitochondrion;ribosome                   | structural molecule activity                                                           | 0.52  | 0.233 | 0.45 |
| Q07349 | MIOREX complex component 9<br>[OS=Saccharomyces cerevisiae S288c]                                    | 851535 | YDL027C; MRX9; YDL027C | endoplasmic reticulum;membrane;mitochondrion                                                             |                                          |                                                                                        | 2.433 | 1.096 | 0.45 |
| P32839 | Mitochondrial chaperone BCS1<br>[OS=Saccharomyces cerevisiae S288c]                                  | 851981 | BCS1; YDR375C          | cell organization and biogenesis;metabolic process;response to stimulus;transport                        | cytosol;membrane;mitochondrion           | catalytic activity;nucleotide binding;transporter activity                             | 0.425 | 0.194 | 0.46 |
| Q01976 | ADP-ribose pyrophosphatase<br>[OS=Saccharomyces cerevisiae S288c]                                    | 852408 | YSA1; YBR111C          | metabolic process                                                                                        | cytoplasm;mitochondrion;nucleus          | catalytic activity;metal ion binding                                                   | 0.425 | 0.194 | 0.46 |
| P03879 | Intron-encoded RNA maturase bI4<br>[OS=Saccharomyces cerevisiae S288c]                               | 854582 | BI4; Q0120             | metabolic process                                                                                        | membrane;mitochondrion                   | catalytic activity;RNA binding                                                         | 0.389 | 0.179 | 0.46 |
| P54115 | Magnesium-activated aldehyde dehydrogenase, cytosolic<br>[OS=Saccharomyces cerevisiae S288c]         | 856044 | ALD6; YPL061W          | metabolic process;response to stimulus                                                                   | cytoplasm;cytosol;mitochondrion          | catalytic activity                                                                     | 0.346 | 0.16  | 0.46 |
| P36523 | 54S ribosomal protein L15, mitochondrial<br>[OS=Saccharomyces cerevisiae S288c]                      | 851022 | MRPL15; YLR312W-A      | cell organization and biogenesis;metabolic process                                                       | mitochondrion;ribosome                   | catalytic activity;RNA binding;structural molecule activity                            | 0.334 | 0.155 | 0.46 |
| P38297 | Mitofusin FZO1<br>[OS=Saccharomyces cerevisiae S288c]                                                | 852477 | FZO1; YBR179C          | cell organization and biogenesis                                                                         | membrane;mitochondrion                   | catalytic activity;nucleotide binding;protein binding                                  | 0.304 | 0.142 | 0.47 |
| Q05931 | Heat shock protein SSQ1, mitochondrial<br>[OS=Saccharomyces cerevisiae S288c]                        | 851084 | SSQ1; YLR369W          | cell organization and biogenesis;metabolic process                                                       | mitochondrion;organelle lumen            | nucleotide binding;protein binding                                                     | 0.884 | 0.413 | 0.47 |
| Q06089 | Uncharacterized mitochondrial outer membrane protein YPR098C<br>[OS=Saccharomyces cerevisiae S288c]  | 856213 | YPR098C; YPR098C       | membrane;mitochondrion                                                                                   |                                          |                                                                                        | 4.623 | 2.162 | 0.47 |
| Q08223 | Altered inheritance of mitochondria protein 39, mitochondrial<br>[OS=Saccharomyces cerevisiae S288c] | 854103 | AIM39; YOL053W         | cytosol;membrane;mitochondrion                                                                           |                                          |                                                                                        | 0.995 | 0.468 | 0.47 |
| P10662 | 37S ribosomal protein MRP1, mitochondrial<br>[OS=Saccharomyces cerevisiae S288c]                     | 851948 | MRP1; YDR347W          | cell organization and biogenesis;metabolic process;response to stimulus                                  | mitochondrion;ribosome                   | antioxidant activity;catalytic activity;metal ion binding;structural molecule activity | 1.239 | 0.585 | 0.47 |
| P52893 | probable alanine aminotransferase, mitochondrial<br>[OS=Saccharomyces cerevisiae S288c]              | 850778 | ALT1; YLR089C          | metabolic process                                                                                        | mitochondrion;organelle lumen            | catalytic activity                                                                     | 0.951 | 0.45  | 0.47 |
| P35191 | DnaJ homolog 1, mitochondrial<br>[OS=Saccharomyces cerevisiae S288c]                                 | 850530 | MDJ1; YFL016C          | cell organization and biogenesis;metabolic process;regulation of biological process;response to stimulus | mitochondrion;organelle lumen            | enzyme regulator activity;metal ion binding;nucleotide binding;protein binding         | 2.765 | 1.31  | 0.47 |
| P36008 | Elongation factor 1-gamma 2<br>[OS=Saccharomyces cerevisiae S288c]                                   | 853781 | TEF4; YKL081W          | metabolic process;regulation of biological process                                                       | cytoplasm;mitochondrion;nucleus;ribosome | catalytic activity;protein binding;RNA binding                                         | 0.202 | 0.096 | 0.48 |
| Q12029 | Probable mitochondrial transport protein fsf1<br>[OS=Saccharomyces cerevisiae S288c]                 | 854445 | FSF1; YOR271C          | transport                                                                                                | membrane;mitochondrion                   | transporter activity                                                                   | 2.793 | 1.336 | 0.48 |
| P18409 | Mitochondrial distribution and morphology protein 10<br>[OS=Saccharomyces cerevisiae S288c]          | 851223 | MDM10; YAL010C         | cell organization and biogenesis;transport                                                               | membrane;mitochondrion                   | protein binding                                                                        | 0.16  | 0.077 | 0.48 |

|        |                                                                                                                |        |                  |                                                                                   |                                         |                                                                                     |        |       |      |
|--------|----------------------------------------------------------------------------------------------------------------|--------|------------------|-----------------------------------------------------------------------------------|-----------------------------------------|-------------------------------------------------------------------------------------|--------|-------|------|
| P00447 | Superoxide dismutase [Mn], mitochondrial [OS=Saccharomyces cerevisiae S288c]                                   | 856399 | SOD2; YHR008C    | metabolic process;response to stimulus                                            | mitochondrion;organelle lumen           | antioxidant activity;catalytic activity;metal ion binding                           | 3.924  | 1.894 | 0.48 |
| P00401 | Cytochrome c oxidase subunit 1 [OS=Saccharomyces cerevisiae S288c]                                             | 854598 | COX1; Q0045      | metabolic process;transport                                                       | membrane;mitochondrion                  | catalytic activity;metal ion binding;transporter activity                           | 1.61   | 0.778 | 0.48 |
| Q12480 | Probable electron transfer flavoprotein subunit alpha, mitochondrial [OS=Saccharomyces cerevisiae S288c]       | 856112 | AIM45; YPR004C   | metabolic process;transport                                                       | mitochondrion;organelle lumen           | catalytic activity;nucleotide binding                                               | 2.548  | 1.239 | 0.49 |
| P38714 | Arginine-tRNA ligase, mitochondrial [OS=Saccharomyces cerevisiae S288c]                                        | 856491 | MSR1; YHR091C    | cell organization and biogenesis;metabolic process                                | cytoplasm;mitochondrion;organelle lumen | catalytic activity;nucleotide binding                                               | 0.113  | 0.055 | 0.49 |
| P28834 | Isocitrate dehydrogenase [NAD] subunit 1, mitochondrial [OS=Saccharomyces cerevisiae S288c]                    | 855691 | IDH1; YNL037C    | metabolic process;transport                                                       | cytosol;mitochondrion;organelle lumen   | catalytic activity;metal ion binding;nucleotide binding;protein binding;RNA binding | 7.859  | 3.833 | 0.49 |
| P38825 | Protein TOM71 [OS=Saccharomyces cerevisiae S288c]                                                              | 856517 | TOM71; YHR117W   | transport                                                                         | membrane;mitochondrion                  | protein binding;transporter activity                                                | 0.701  | 0.343 | 0.49 |
| P43635 | Citrate synthase 3, mitochondrial [OS=Saccharomyces cerevisiae S288c]                                          | 856107 | CIT3; YPR001W    | metabolic process                                                                 | mitochondrion                           | catalytic activity                                                                  | 3.642  | 1.783 | 0.49 |
| P07275 | Delta-1-pyrroline-5-carboxylate dehydrogenase, mitochondrial [OS=Saccharomyces cerevisiae S288c]               | 856432 | PUT2; YHR037W    | metabolic process                                                                 | membrane;mitochondrion;organelle lumen  | catalytic activity                                                                  | 5.579  | 2.765 | 0.50 |
| P32891 | D-lactate dehydrogenase [cytochrome] 1, mitochondrial [OS=Saccharomyces cerevisiae S288c]                      | 851380 | DLD1; YDL174C    | metabolic process;transport                                                       | membrane;mitochondrion                  | catalytic activity;nucleotide binding                                               | 11.253 | 5.661 | 0.50 |
| P53140 | Protein RMD9, mitochondrial [OS=Saccharomyces cerevisiae S288c]                                                | 852771 | RMD9; YGL107C    | cell differentiation;metabolic process;regulation of biological process           | membrane;mitochondrion                  | RNA binding                                                                         | 1.154  | 0.585 | 0.51 |
| P32317 | Protein AFG1 [OS=Saccharomyces cerevisiae S288c]                                                               | 856658 | AFG1; YEL052W    | cell organization and biogenesis;metabolic process;response to stimulus;transport | membrane;mitochondrion                  | catalytic activity;nucleotide binding                                               | 1.154  | 0.585 | 0.51 |
| P36525 | 54S ribosomal protein L24, mitochondrial [OS=Saccharomyces cerevisiae S288c]                                   | 855231 | MRPL24; YMR193W  | cell organization and biogenesis;metabolic process                                | mitochondrion;ribosome                  | RNA binding;structural molecule activity                                            | 1.154  | 0.585 | 0.51 |
| P47052 | succinate dehydrogenase [ubiquinone] flavoprotein subunit 2, mitochondrial [OS=Saccharomyces cerevisiae S288c] | 853405 | YJL045W; YJL045W | metabolic process;transport                                                       | membrane;mitochondrion                  | catalytic activity;nucleotide binding                                               | 4.043  | 2.065 | 0.51 |
| Q12031 | Mitochondrial 2-methylisocitrate lyase [OS=Saccharomyces cerevisiae S288c]                                     | 856114 | ICL2; YPR006C    | metabolic process                                                                 | mitochondrion;organelle lumen           | catalytic activity                                                                  | 3.833  | 1.976 | 0.52 |
| P40008 | Protein FMP52, mitochondrial [OS=Saccharomyces cerevisiae S288c]                                               | 856721 | FMP52; YER004W   | endoplasmic reticulum;membrane;mitochondrion                                      |                                         | catalytic activity                                                                  | 2.652  | 1.371 | 0.52 |
| P40086 | Cytochrome c oxidase assembly protein cox15 [OS=Saccharomyces cerevisiae S288c]                                | 856884 | COX15; YER141W   | cell organization and biogenesis;metabolic process;transport                      | membrane;mitochondrion                  | catalytic activity;transporter activity                                             | 2.594  | 1.346 | 0.52 |
| P40098 | uncharacterized mitochondrial membrane protein FMP10 [OS=Saccharomyces cerevisiae S288c]                       | 856931 | FMP10; YER182W   | membrane;mitochondrion                                                            |                                         |                                                                                     | 4.456  | 2.36  | 0.53 |
| P43617 | Uncharacterized mitochondrial carrier YFR045W [OS=Saccharomyces cerevisiae S288c]                              | 850606 | YFR045W; YFR045W | metabolic process;transport                                                       | membrane;mitochondrion                  | structural molecule activity;transporter activity                                   | 0.778  | 0.413 | 0.53 |
| P38891 | Branched-chain-amino acid aminotransferase, mitochondrial [OS=Saccharomyces                                    | 856615 | BAT1; YHR208W    | metabolic process;regulation of biological process;response to                    | mitochondrion;organelle lumen           | catalytic activity                                                                  | 7.111  | 3.806 | 0.54 |

|        |                                                                                                                                                        |            |                         |                                                                                              |                                        |                                                               |        |       |      |
|--------|--------------------------------------------------------------------------------------------------------------------------------------------------------|------------|-------------------------|----------------------------------------------------------------------------------------------|----------------------------------------|---------------------------------------------------------------|--------|-------|------|
|        | cerevisiae S288c]                                                                                                                                      |            |                         | stimulus                                                                                     |                                        |                                                               |        |       |      |
| P10834 | protein PET54<br>[OS=Saccharomyces cerevisiae S288c]                                                                                                   | 85313<br>7 | PET54; YGR222W          | metabolic process;regulation of biological process                                           | membrane;mitochondrion;organelle lumen | nucleotide binding;RNA binding;translation regulator activity | 0.688  | 0.369 | 0.54 |
| P19262 | Dihydropolyllysine-residue succinyltransferase component of 2-oxoglutarate dehydrogenase complex, mitochondrial<br>[OS=Saccharomyces cerevisiae S288c] | 85172<br>6 | KGD2; YDR148C           | cell organization and biogenesis;metabolic process                                           | mitochondrion                          | catalytic activity;protein binding                            | 5.7    | 3.062 | 0.54 |
| Q05648 | MIOREX complex component 10<br>[OS=Saccharomyces cerevisiae S288c]                                                                                     | 85187<br>6 | YDR282C; MRX10; YDR282C | membrane;mitochondrion                                                                       |                                        |                                                               | 0.65   | 0.35  | 0.54 |
| P34227 | Mitochondrial peroxiredoxin PRX1<br>[OS=Saccharomyces cerevisiae S288c]                                                                                | 85221<br>5 | PRX1; YBL064C           | cellular homeostasis;metabolic process;regulation of biological process;response to stimulus | mitochondrion                          | antioxidant activity;catalytic activity                       | 5.158  | 2.793 | 0.54 |
| P40961 | prohibitin-1<br>[OS=Saccharomyces cerevisiae S288c]                                                                                                    | 85303<br>3 | PHB1; YGR132C           | cell organization and biogenesis;metabolic process;regulation of biological process          | membrane;mitochondrion                 | protein binding                                               | 5.158  | 2.793 | 0.54 |
| P39006 | Phosphatidylserine decarboxylase proenzyme 1, mitochondrial<br>[OS=Saccharomyces cerevisiae S288c]                                                     | 85555<br>2 | PSD1; YNL169C           | metabolic process;regulation of biological process                                           | membrane;mitochondrion                 | catalytic activity                                            | 0.487  | 0.269 | 0.55 |
| Q96VH5 | MICOS complex subunit Mic10<br>[OS=Saccharomyces cerevisiae S288c]                                                                                     | 85030<br>0 | MOS1; MIC10; YLR057C-A  | cell organization and biogenesis                                                             | membrane;mitochondrion                 |                                                               | 1.683  | 0.931 | 0.55 |
| P42940 | Probable electron transfer flavoprotein subunit beta<br>[OS=Saccharomyces cerevisiae S288c]                                                            | 85312<br>1 | CIR1; YGR207C           | metabolic process;transport                                                                  | mitochondrion;organelle lumen          |                                                               | 3.87   | 2.162 | 0.56 |
| Q04472 | Mitochondrial inner membrane i-AAA protease supercomplex subunit MGR3<br>[OS=Saccharomyces cerevisiae S288c]                                           | 85514<br>2 | MGR3; YMR115W           | metabolic process                                                                            | membrane;mitochondrion                 | protein binding                                               | 0.417  | 0.233 | 0.56 |
| Q06567 | ABC1 family protein MCP2<br>[OS=Saccharomyces cerevisiae S288c]                                                                                        | 85095<br>5 | YLR253W; MCP2; YLR253W  | cell organization and biogenesis                                                             | membrane;mitochondrion                 |                                                               | 0.389  | 0.218 | 0.56 |
| P09457 | ATP synthase subunit 5, mitochondrial<br>[OS=Saccharomyces cerevisiae S288c]                                                                           | 85189<br>2 | ATP5; YDR298C           | metabolic process;transport                                                                  | membrane;mitochondrion                 | catalytic activity;transporter activity                       | 10.365 | 5.813 | 0.56 |
| P37299 | cytochrome b-c1 complex subunit 10<br>[OS=Saccharomyces cerevisiae S288c]                                                                              | 85639<br>0 | QCR10; YHR001W-A        | metabolic process;transport                                                                  | membrane;mitochondrion                 | catalytic activity;transporter activity                       | 5.31   | 2.981 | 0.56 |
| Q12374 | Nuclear control of ATPase protein 2<br>[OS=Saccharomyces cerevisiae S288c]                                                                             | 85627<br>8 | NCA2; YPR155C           | metabolic process                                                                            | membrane;mitochondrion                 |                                                               | 0.668  | 0.377 | 0.56 |
| P40047 | Aldehyde dehydrogenase 5, mitochondrial<br>[OS=Saccharomyces cerevisiae S288c]                                                                         | 85680<br>4 | ALD5; YER073W           | metabolic process                                                                            | mitochondrion;organelle lumen          | catalytic activity                                            | 1.955  | 1.106 | 0.57 |
| Q12233 | ATP synthase subunit g, mitochondrial<br>[OS=Saccharomyces cerevisiae S288c]                                                                           | 85613<br>1 | ATP20; YPR020W          | cell organization and biogenesis;metabolic process;transport                                 | membrane;mitochondrion                 | catalytic activity;transporter activity                       | 1.371  | 0.778 | 0.57 |
| P36147 | Presequence translocated-associated motor subunit pam17, mitochondrial<br>[OS=Saccharomyces cerevisiae S288c]                                          | 85393<br>9 | PAM17; YKR065C          | transport                                                                                    | membrane;mitochondrion                 |                                                               | 1.371  | 0.778 | 0.57 |
| Q12428 | Probable 2-methylcitrate dehydratase<br>[OS=Saccharomyces cerevisiae S288c]                                                                            | 85610<br>8 | PDH1; YPR002W           | metabolic process                                                                            | cytoplasm;membrane;mitochondrion       | catalytic activity                                            | 12.335 | 7.058 | 0.57 |
| P53732 | 37S ribosomal protein S12, mitochondrial<br>[OS=Saccharomyces cerevisiae S288c]                                                                        | 85577<br>2 | MRP512; YNR036C         | cell organization and biogenesis;metabolic process                                           | mitochondrion;ribosome                 | structural molecule activity                                  | 1.154  | 0.668 | 0.58 |



|        |                                                                                                               |        |                |                                                                                                          |                                         |                                                                           |        |       |      |
|--------|---------------------------------------------------------------------------------------------------------------|--------|----------------|----------------------------------------------------------------------------------------------------------|-----------------------------------------|---------------------------------------------------------------------------|--------|-------|------|
| P36775 | Lon protease homolog, mitochondrial [OS=Saccharomyces cerevisiae S288c]                                       | 852259 | PIM1; YBL022C  | cell organization and biogenesis;metabolic process;regulation of biological process;response to stimulus | cytoplasm;mitochondrion;organelle lumen | catalytic activity;DNA binding;nucleotide binding;RNA binding             | 0.685  | 0.402 | 0.59 |
| P53598 | Succinyl-CoA ligase [ADP-forming] subunit alpha, mitochondrial [OS=Saccharomyces cerevisiae S288c]            | 854310 | LSC1; YOR142W  | metabolic process                                                                                        | cytosol;mitochondrion                   | catalytic activity;nucleotide binding                                     | 13.384 | 7.859 | 0.59 |
| Q06143 | mitochondrial dicarboxylate transporter [OS=Saccharomyces cerevisiae S288c]                                   | 851063 | DIC1; YLR348C  | metabolic process;transport                                                                              | membrane;mitochondrion                  | structural molecule activity;transporter activity                         | 0.931  | 0.551 | 0.59 |
| P00410 | Cytochrome c oxidase subunit 2 [OS=Saccharomyces cerevisiae S288c]                                            | 854622 | COX2; Q0250    | metabolic process;transport                                                                              | membrane;mitochondrion                  | catalytic activity;metal ion binding;protein binding;transporter activity | 3.642  | 2.162 | 0.59 |
| P07246 | Alcohol dehydrogenase 3, mitochondrial [OS=Saccharomyces cerevisiae S288c]                                    | 855107 | ADH3; YMR083W  | metabolic process                                                                                        | mitochondrion;organelle lumen           | catalytic activity;metal ion binding                                      | 7.031  | 4.179 | 0.59 |
| Q08023 | Protein FMP25, mitochondrial [OS=Saccharomyces cerevisiae S288c]                                              | 850766 | FMP25; YLR077W | cell organization and biogenesis                                                                         | membrane;mitochondrion                  |                                                                           | 1.412  | 0.84  | 0.59 |
| P53292 | 37S ribosomal protein S35, mitochondrial [OS=Saccharomyces cerevisiae S288c]                                  | 853075 | MRP35; YGR165W | cell organization and biogenesis;metabolic process                                                       | mitochondrion;ribosome                  | structural molecule activity                                              | 1.512  | 0.905 | 0.60 |
| P09624 | Dihydrolipoyl dehydrogenase, mitochondrial [OS=Saccharomyces cerevisiae S288c]                                | 850527 | LPD1; YFL018C  | cellular homeostasis;metabolic process;regulation of biological process                                  | mitochondrion;organelle lumen           | catalytic activity;nucleotide binding                                     | 21.539 | 13.03 | 0.60 |
| P32843 | Mitochondrial escape protein 2 [OS=Saccharomyces cerevisiae S288c]                                            | 855348 | YME2; YMR302C  | cell organization and biogenesis;metabolic process                                                       | membrane;mitochondrion                  | nucleotide binding;RNA binding                                            | 3.458  | 2.099 | 0.61 |
| Q02950 | 37S ribosomal protein MRP51, mitochondrial [OS=Saccharomyces cerevisiae S288c]                                | 855985 | MRP51; YPL118W | cell organization and biogenesis;metabolic process                                                       | mitochondrion;ribosome                  | structural molecule activity                                              | 0.668  | 0.407 | 0.61 |
| P32611 | 54S ribosomal protein RML2, mitochondrial [OS=Saccharomyces cerevisiae S288c]                                 | 856660 | RML2; YEL050C  | cell organization and biogenesis;metabolic process                                                       | mitochondrion;ribosome                  | catalytic activity;RNA binding;structural molecule activity               | 0.638  | 0.389 | 0.61 |
| P23180 | Probable oxidoreductase AIM17 [OS=Saccharomyces cerevisiae S288c]                                             | 856365 | AIM17; YHL021C | cell organization and biogenesis;metabolic process                                                       | mitochondrion                           | catalytic activity;metal ion binding                                      | 2.981  | 1.818 | 0.61 |
| P33311 | ATP-dependent permease MDL2, mitochondrial [OS=Saccharomyces cerevisiae S288c]                                | 855858 | MDL2; YPL270W  | response to stimulus;transport                                                                           | membrane;mitochondrion                  | catalytic activity;nucleotide binding;transporter activity                | 1.006  | 0.619 | 0.62 |
| Q12375 | mitochondrial ornithine transporter 1 [OS=Saccharomyces cerevisiae S288c]                                     | 854297 | ORT1; YOR130C  | metabolic process;transport                                                                              | membrane;mitochondrion                  | structural molecule activity;transporter activity                         | 0.54   | 0.334 | 0.62 |
| P14693 | sorting assembly machinery 35 kDa subunit [OS=Saccharomyces cerevisiae S288c]                                 | 856483 | SAM35; YHR083W | cell organization and biogenesis;transport                                                               | membrane;mitochondrion                  | protein binding                                                           | 0.54   | 0.334 | 0.62 |
| P38071 | Enoyl-[acyl-carrier protein] reductase [NADPH, B-specific], mitochondrial [OS=Saccharomyces cerevisiae S288c] | 852314 | ETR1; YBR026C  | metabolic process                                                                                        | mitochondrion;organelle lumen           | catalytic activity;DNA binding;metal ion binding                          | 9      | 5.579 | 0.62 |
| P53889 | uncharacterized mitochondrial hydrolase FMP41 [OS=Saccharomyces cerevisiae S288c]                             | 855553 | FMP41; YNL168C | metabolic process                                                                                        | mitochondrion                           | catalytic activity;metal ion binding                                      | 0.501  | 0.311 | 0.62 |
| Q03798 | Altered inheritance of mitochondria protein 36, mitochondrial [OS=Saccharomyces cerevisiae S288c]             | 855189 | AIM36; YMR157C |                                                                                                          | membrane;mitochondrion                  |                                                                           | 1.336  | 0.833 | 0.62 |
| P19516 | Cytochrome c oxidase assembly protein COX11, mitochondrial [OS=Saccharomyces cerevisiae S288c]                | 855971 | COX11; YPL132W | cell organization and biogenesis;metabolic process                                                       | membrane;mitochondrion;ribosome         | metal ion binding                                                         | 0.438  | 0.274 | 0.63 |

|          |                                                                                                                 |            |                |                                                                                              |                                              |                                                                   |        |        |      |
|----------|-----------------------------------------------------------------------------------------------------------------|------------|----------------|----------------------------------------------------------------------------------------------|----------------------------------------------|-------------------------------------------------------------------|--------|--------|------|
| P38271   | Protein OPY1<br>[OS=Saccharomyces cerevisiae S288c]                                                             | 85242<br>6 | OPY1; YBR129C  | cytoplasm;mitochondrion                                                                      |                                              | 0.438                                                             | 0.274  | 0.63   |      |
| P48015   | Aminomethyltransferase , mitochondrial<br>[OS=Saccharomyces cerevisiae S288c]                                   | 85158<br>2 | GCV1; YDR019C  | metabolic process                                                                            | mitochondrion                                | catalytic activity;protein binding                                | 8.047  | 5.062  | 0.63 |
| Q07500   | External NADH-ubiquinone oxidoreductase 2, mitochondrial<br>[OS=Saccharomyces cerevisiae S288c]                 | 85147<br>4 | NDE2; YDL085W  | metabolic process                                                                            | mitochondrion                                | catalytic activity;nucleotide binding                             | 6.356  | 4.012  | 0.63 |
| P32792   | UPF0744 protein YSC83<br>[OS=Saccharomyces cerevisiae S288c]                                                    | 85641<br>0 | YSC83; YHR017W | membrane;mitochondrion                                                                       |                                              |                                                                   | 0.369  | 0.233  | 0.63 |
| P47127   | Altered inheritance of mitochondria protein 24, mitochondrial<br>[OS=Saccharomyces cerevisiae S288c]            | 85354<br>3 | AIM24; YJR080C | cell organization and biogenesis                                                             | mitochondrion                                |                                                                   | 2.857  | 1.807  | 0.63 |
| P37293   | N-terminal acetyltransferase 2<br>[OS=Saccharomyces cerevisiae S288c]                                           | 85305<br>0 | NAT2; YGR147C  | metabolic process                                                                            | cytoplasm;mitochondrion                      | catalytic activity                                                | 1.154  | 0.73   | 0.63 |
| P40015   | inositol phosphosphingolipids phospholipase C<br>[OS=Saccharomyces cerevisiae S288c]                            | 85673<br>9 | ISC1; YER019W  | metabolic process;response to stimulus                                                       | endoplasmic reticulum;membrane;mitochondrion | catalytic activity;metal ion binding                              | 0.334  | 0.212  | 0.63 |
| Q00711   | Succinate dehydrogenase [ubiquinone] flavoprotein subunit, mitochondrial<br>[OS=Saccharomyces cerevisiae S288c] | 85370<br>9 | SDH1; YKL148C  | metabolic process;transport                                                                  | membrane;mitochondrion                       | catalytic activity;nucleotide binding;protein binding             | 8.454  | 5.381  | 0.64 |
| Q01532-1 | Cysteine proteinase 1, mitochondrial<br>[OS=Saccharomyces cerevisiae S288c]                                     |            | MCY1           | metabolic process;regulation of biological process;response to stimulus                      | cytoplasm;mitochondrion                      | catalytic activity;DNA binding;RNA binding                        | 0.28   | 0.179  | 0.64 |
| P41921   | glutathione reductase<br>[OS=Saccharomyces cerevisiae S288c]                                                    | 85601<br>4 | GLR1; YPL091W  | cellular homeostasis;metabolic process;regulation of biological process;response to stimulus | cytoplasm;cytosol;mitochondrion              | antioxidant activity;catalytic activity;nucleotide binding        | 0.241  | 0.155  | 0.64 |
| P38705   | Serine--tRNA ligase, mitochondrial<br>[OS=Saccharomyces cerevisiae S288c]                                       | 85640<br>2 | DIA4; YHR011W  | metabolic process                                                                            | cytoplasm;mitochondrion;organelle lumen      | catalytic activity;nucleotide binding                             | 0.233  | 0.15   | 0.64 |
| P07236   | Threonine--tRNA ligase, mitochondrial<br>[OS=Saccharomyces cerevisiae S288c]                                    | 85364<br>0 | MST1; YKL194C  | metabolic process                                                                            | cytoplasm;mitochondrion;organelle lumen      | catalytic activity;nucleotide binding;RNA binding                 | 0.233  | 0.15   | 0.64 |
| P53266   | Cytochrome oxidase assembly protein SHY1<br>[OS=Saccharomyces cerevisiae S288c]                                 | 85300<br>9 | SHY1; YGR112W  | cell organization and biogenesis                                                             | membrane;mitochondrion                       | protein binding                                                   | 1.783  | 1.154  | 0.65 |
| P32340   | Rotenone-insensitive NADH-ubiquinone oxidoreductase, mitochondrial<br>[OS=Saccharomyces cerevisiae S288c]       | 85491<br>9 | NDI1; YML120C  | metabolic process;regulation of biological process                                           | membrane;mitochondrion;organelle lumen       | catalytic activity;nucleotide binding                             | 16.433 | 10.721 | 0.65 |
| P36013   | NAD-dependent malic enzyme, mitochondrial<br>[OS=Saccharomyces cerevisiae S288c]                                | 85383<br>9 | MAE1; YKL029C  | metabolic process                                                                            | mitochondrion;organelle lumen                | catalytic activity;metal ion binding;nucleotide binding           | 1.512  | 0.995  | 0.66 |
| P38127   | mitochondrial carrier protein RIM2<br>[OS=Saccharomyces cerevisiae S288c]                                       | 85249<br>1 | RIM2; YBR192W  | cell organization and biogenesis;metabolic process;transport                                 | membrane;mitochondrion                       | structural molecule activity;transporter activity                 | 1.512  | 0.995  | 0.66 |
| Q06668   | Methyltransferase OMS1, mitochondrial<br>[OS=Saccharomyces cerevisiae S288c]                                    | 85191<br>1 | OMS1; YDR316W  | metabolic process                                                                            | membrane;mitochondrion                       | catalytic activity                                                | 0.585  | 0.389  | 0.66 |
| P04710   | ADP,ATP carrier protein 1<br>[OS=Saccharomyces cerevisiae S288c]                                                | 85507<br>8 | AAC1; YMR056C  | metabolic process;transport                                                                  | cytosol;membrane;mitochondrion               | structural molecule activity;transporter activity                 | 10.288 | 6.848  | 0.67 |
| P23641   | mitochondrial phosphate carrier protein<br>[OS=Saccharomyces cerevisiae S288c]                                  | 85354<br>0 | MIR1; YJR077C  | metabolic process;transport                                                                  | membrane;mitochondrion                       | protein binding;structural molecule activity;transporter activity | 20.544 | 13.678 | 0.67 |
| P08067   | cytochrome b-c1 complex subunit Rieske, mitochondrial                                                           | 85668<br>9 | RIP1; YEL024W  | metabolic process;transport                                                                  | membrane;mitochondrion                       | catalytic activity;metal ion                                      | 25.102 | 16.783 | 0.67 |

|        |                                                                                                              |        |                  |                                                                                         |                                                          |                                                                                |        |        |      |
|--------|--------------------------------------------------------------------------------------------------------------|--------|------------------|-----------------------------------------------------------------------------------------|----------------------------------------------------------|--------------------------------------------------------------------------------|--------|--------|------|
|        | [OS=Saccharomyces cerevisiae S288c]                                                                          |        |                  |                                                                                         |                                                          | binding; transporter activity                                                  |        |        |      |
| P38910 | 10 kDa heat shock protein, mitochondrial [OS=Saccharomyces cerevisiae S288c]                                 | 854185 | HSP10; YOR020C   | cell organization and biogenesis; metabolic process; response to stimulus; transport    | cytoplasm; mitochondrion; organelle lumen                | metal ion binding; nucleotide binding; protein binding                         | 3.217  | 2.162  | 0.67 |
| P00830 | ATP synthase subunit beta, mitochondrial [OS=Saccharomyces cerevisiae S288c]                                 | 853585 | ATP2; YJR121W    | metabolic process; transport                                                            | cytosol; membrane; mitochondrion                         | catalytic activity; nucleotide binding; protein binding; transporter activity  | 38.811 | 26.123 | 0.67 |
| P21560 | Protein CBP3, mitochondrial [OS=Saccharomyces cerevisiae S288c]                                              | 855886 | CBP3; YPL215W    | cell organization and biogenesis; regulation of biological process                      | membrane; mitochondrion; ribosome                        |                                                                                | 1.031  | 0.701  | 0.68 |
| P15108 | ATP-dependent molecular chaperone HSC82 [OS=Saccharomyces cerevisiae S288c]                                  | 855224 | HSC82; YMR186W   | cell organization and biogenesis; metabolic process; response to stimulus               | cytoplasm; membrane; mitochondrion                       | catalytic activity; nucleotide binding; protein binding                        | 1.565  | 1.081  | 0.69 |
| P49095 | Glycine dehydrogenase (Decarboxylating), mitochondrial [OS=Saccharomyces cerevisiae S288c]                   | 855227 | GCV2; YMR189W    | metabolic process                                                                       | cytosol; mitochondrion                                   | catalytic activity                                                             | 1.575  | 1.096  | 0.70 |
| P36046 | Mitochondrial intermembrane space import and assembly protein 40 [OS=Saccharomyces cerevisiae S288c]         | 853639 | MIA40; YKL195W   | cellular component movement; metabolic process; response to stimulus; transport         | membrane; mitochondrion                                  | catalytic activity; protein binding; transporter activity                      | 2.914  | 2.03   | 0.70 |
| P32387 | 54S ribosomal protein L41, mitochondrial [OS=Saccharomyces cerevisiae S288c]                                 | 852014 | MRP20; YDR405W   | cell organization and biogenesis; metabolic process                                     | mitochondrion; ribosome                                  | nucleotide binding; protein binding; RNA binding; structural molecule activity | 0.719  | 0.501  | 0.70 |
| P32191 | Glycerol-3-phosphate dehydrogenase, mitochondrial [OS=Saccharomyces cerevisiae S288c]                        | 854651 | GUT2; YIL155C    | metabolic process                                                                       | membrane; mitochondrion                                  | catalytic activity                                                             | 6.097  | 4.289  | 0.70 |
| Q12251 | Uncharacterized mitochondrial carrier YPR011C [OS=Saccharomyces cerevisiae S288c]                            | 856121 | YPR011C; YPR011C | metabolic process; transport                                                            | membrane; mitochondrion                                  | structural molecule activity; transporter activity                             | 0.551  | 0.389  | 0.71 |
| P40035 | Mitochondrial phosphate carrier protein 2 [OS=Saccharomyces cerevisiae S288c]                                | 856779 | PIC2; YER053C    | cellular homeostasis; metabolic process; transport                                      | membrane; mitochondrion                                  | structural molecule activity; transporter activity                             | 2.793  | 1.976  | 0.71 |
| Q04458 | Fatty aldehyde dehydrogenase HFD1 [OS=Saccharomyces cerevisiae S288c]                                        | 855137 | HFD1; YMR110C    | metabolic process                                                                       | endoplasmic reticulum; endosome; membrane; mitochondrion | catalytic activity                                                             | 3.642  | 2.594  | 0.71 |
| P38702 | mitochondrial carrier protein LEU5 [OS=Saccharomyces cerevisiae S288c]                                       | 856391 | LEU5; YHR002W    | metabolic process; transport                                                            | membrane; mitochondrion                                  | structural molecule activity; transporter activity                             | 0.468  | 0.334  | 0.71 |
| Q08970 | Mitochondrial metal transporter 2 [OS=Saccharomyces cerevisiae S288c]                                        | 855877 | MMT2; YPL224C    | cellular homeostasis; regulation of biological process; response to stimulus; transport | membrane; mitochondrion                                  | transporter activity                                                           | 0.407  | 0.292  | 0.72 |
| P39925 | Mitochondrial respiratory chain complexes assembly protein AFG3 [OS=Saccharomyces cerevisiae S288c]          | 856737 | AFG3; YER017C    | cell organization and biogenesis; metabolic process; response to stimulus; transport    | membrane; mitochondrion                                  | catalytic activity; metal ion binding; nucleotide binding; protein binding     | 1.015  | 0.734  | 0.72 |
| P33421 | Succinate dehydrogenase [ubiquinone] cytochrome b subunit, mitochondrial [OS=Saccharomyces cerevisiae S288c] | 853716 | SDH3; YKL141W    | cell organization and biogenesis; metabolic process; transport                          | membrane; mitochondrion                                  | catalytic activity; metal ion binding                                          | 1.276  | 0.931  | 0.73 |
| Q12166 | 2-isopropylmalate synthase 2, mitochondrial [OS=Saccharomyces cerevisiae S288c]                              | 854275 | LEU9; YOR108W    | metabolic process                                                                       | mitochondrion                                            | catalytic activity; protein binding                                            | 1.707  | 1.246  | 0.73 |
| P19414 | Aconitate hydratase, mitochondrial [OS=Saccharomyces cerevisiae S288c]                                       | 851013 | ACO1; YLR304C    | cell organization and biogenesis; metabolic process; transport                          | cytoplasm; cytosol; mitochondrion; organelle lumen       | catalytic activity; DNA binding; metal ion binding                             | 24.885 | 18.169 | 0.73 |

|          |                                                                                                     |        |                        |                                                                                     |                                                               |                                                                           |        |        |      |
|----------|-----------------------------------------------------------------------------------------------------|--------|------------------------|-------------------------------------------------------------------------------------|---------------------------------------------------------------|---------------------------------------------------------------------------|--------|--------|------|
| P40215   | External NADH-ubiquinone oxidoreductase 1, mitochondrial [OS=Saccharomyces cerevisiae S288c]        | 855176 | NDE1; YMR145C          | metabolic process                                                                   | mitochondrion                                                 | catalytic activity;nucleotide binding                                     | 5.078  | 3.739  | 0.74 |
| P32904   | 54S ribosomal protein L6, mitochondrial [OS=Saccharomyces cerevisiae S288c]                         | 856552 | MRPL6; YHR147C         | cell organization and biogenesis;metabolic process                                  | mitochondrion;ribosome                                        | RNA binding;structural molecule activity                                  | 1.054  | 0.778  | 0.74 |
| P06208-1 | 2-isopropylmalate synthase [OS=Saccharomyces cerevisiae S288c]                                      | 855619 | LEU4; YNL104C          | metabolic process                                                                   | cytoplasm;mitochondrion                                       | catalytic activity;protein binding                                        | 4.223  | 3.125  | 0.74 |
| P23644   | Mitochondrial import receptor subunit TOM40 [OS=Saccharomyces cerevisiae S288c]                     | 855243 | TOM40; YMR203W         | transport                                                                           | cytosol;membrane;mitochondrion                                | protein binding;transporter activity                                      | 0.896  | 0.668  | 0.75 |
| P38523   | GrpE protein homolog, mitochondrial [OS=Saccharomyces cerevisiae S288c]                             | 854407 | MGE1; YOR232W          | metabolic process;regulation of biological process;transport                        | membrane;mitochondrion;organelle lumen                        | enzyme regulator activity;nucleotide binding;protein binding              | 0.833  | 0.624  | 0.75 |
| P07256   | Cytochrome b-c1 complex subunit 1, mitochondrial [OS=Saccharomyces cerevisiae S288c]                | 852235 | COR1; YBL045C          | metabolic process;transport                                                         | membrane;mitochondrion                                        | catalytic activity;metal ion binding;protein binding;transporter activity | 9.89   | 7.432  | 0.75 |
| P36534   | 54S ribosomal protein L40, mitochondrial [OS=Saccharomyces cerevisiae S288c]                        | 855930 | MRPL40; YPL173W        | cell organization and biogenesis;metabolic process                                  | mitochondrion;ribosome                                        | protein binding;structural molecule activity                              | 0.778  | 0.585  | 0.75 |
| P32473   | Pyruvate dehydrogenase E1 component subunit beta, mitochondrial [OS=Saccharomyces cerevisiae S288c] | 852522 | PDB1; YBR221C          | metabolic process                                                                   | mitochondrion;organelle lumen                                 | catalytic activity                                                        | 6.848  | 5.158  | 0.75 |
| P53736   | Uncharacterized protein YNR040W [OS=Saccharomyces cerevisiae S288c]                                 | 855776 | YNR040W; YNR040W       | mitochondrion                                                                       |                                                               |                                                                           | 0.73   | 0.551  | 0.75 |
| P50085   | Prohibitin-2 [OS=Saccharomyces cerevisiae S288c]                                                    | 853146 | PHB2; YGR231C          | cell organization and biogenesis;metabolic process;regulation of biological process | membrane;mitochondrion                                        | protein binding                                                           | 3.806  | 2.899  | 0.76 |
| P07251   | ATP synthase subunit alpha, mitochondrial [OS=Saccharomyces cerevisiae S288c]                       | 852177 | ATP1; YBL099W          | metabolic process;transport                                                         | cytosol;membrane;mitochondrion                                | catalytic activity;nucleotide binding;transporter activity                | 26.826 | 20.544 | 0.77 |
| P36112   | MICOS complex subunit Mic60 [OS=Saccharomyces cerevisiae S288c]                                     | 853886 | FCJ1; MIC60; YKR016W   | cell organization and biogenesis;transport                                          | membrane;mitochondrion                                        |                                                                           | 15.379 | 11.798 | 0.77 |
| P40508   | Uncharacterized protein YIL077C [OS=Saccharomyces cerevisiae S288c]                                 | 854733 | YIL077C; YIL077C       | mitochondrion                                                                       |                                                               |                                                                           | 1.154  | 0.896  | 0.78 |
| Q01574   | acetyl-coenzyme A synthetase 1 [OS=Saccharomyces cerevisiae S288c]                                  | 851245 | ACS1; YAL054C          | cell organization and biogenesis;metabolic process                                  | cytoplasm;cytosol;endoplasmic reticulum;mitochondrion;nucleus | catalytic activity;nucleotide binding                                     | 3.281  | 2.57   | 0.78 |
| P40012   | protoporphyrinogen oxidase [OS=Saccharomyces cerevisiae S288c]                                      | 856733 | HEM14; YER014W         | metabolic process                                                                   | membrane;mitochondrion                                        | catalytic activity                                                        | 1.198  | 0.947  | 0.79 |
| P36101   | tRNA threonylcarbamoyladenosine dehydratase 2 [OS=Saccharomyces cerevisiae S288c]                   | 853841 | TCD2; YKL027W; YKL027W | metabolic process                                                                   | cytosol;membrane;mitochondrion                                | catalytic activity;nucleotide binding                                     | 0.778  | 0.616  | 0.79 |
| P10507   | mitochondrial-processing peptidase subunit beta [OS=Saccharomyces cerevisiae S288c]                 | 850860 | MAS1; YLR163C          | metabolic process;transport                                                         | mitochondrion;organelle lumen                                 | catalytic activity;metal ion binding;protein binding                      | 0.778  | 0.616  | 0.79 |
| P53969   | Sorting assembly machinery 50 kDa subunit [OS=Saccharomyces cerevisiae S288c]                       | 855705 | SAM50; YNL026W         | cell organization and biogenesis;transport                                          | membrane;mitochondrion                                        | protein binding;transporter activity                                      | 0.61   | 0.487  | 0.80 |
| Q02981   | ABC1 family protein YPL109C, mitochondrial [OS=Saccharomyces cerevisiae S288c]                      | 855995 | YPL109C; YPL109C       | mitochondrion                                                                       |                                                               |                                                                           | 0.413  | 0.334  | 0.81 |
| P46367   | Potassium-activated aldehyde dehydrogenase, mitochondrial                                           | 854556 | ALD4; YOR374W          | metabolic process                                                                   | mitochondrion;organelle lumen                                 | catalytic activity                                                        | 24.119 | 19.62  | 0.81 |

|        |                                                                                                                                              |        |                  |                                                                                               |                                                |                                                                                 |        |        |      |
|--------|----------------------------------------------------------------------------------------------------------------------------------------------|--------|------------------|-----------------------------------------------------------------------------------------------|------------------------------------------------|---------------------------------------------------------------------------------|--------|--------|------|
|        | [OS=Saccharomyces cerevisiae S288c]                                                                                                          |        |                  |                                                                                               |                                                |                                                                                 |        |        |      |
| P47045 | mitochondrial import inner membrane translocase subunit TIM54 [OS=Saccharomyces cerevisiae S288c]                                            | 853392 | TIM54; YJL054W   | cell organization and biogenesis;transport                                                    | cytosol;membrane;mitochondrion                 | transporter activity                                                            | 0.655  | 0.54   | 0.82 |
| P25573 | Mitochondrial inner membrane i-AAA protease supercomplex subunit MGR1 [OS=Saccharomyces cerevisiae S288c]                                    | 850313 | MGR1; YCL044C    | metabolic process                                                                             | membrane;mitochondrion                         | protein binding                                                                 | 1.031  | 0.859  | 0.83 |
| P53312 | Succinyl-CoA ligase [ADP-forming] subunit beta, mitochondrial [OS=Saccharomyces cerevisiae S288c]                                            | 853159 | LSC2; YGR244C    | metabolic process                                                                             | mitochondrion                                  | catalytic activity;nucleotide binding                                           | 7.003  | 5.898  | 0.84 |
| P40416 | Iron-sulfur clusters transporter ATM1, mitochondrial [OS=Saccharomyces cerevisiae S288c]                                                     | 855347 | ATM1; YMR301C    | cellular homeostasis;metabolic process;transport                                              | membrane;mitochondrion                         | catalytic activity;nucleotide binding;transporter activity                      | 0.645  | 0.546  | 0.85 |
| P00360 | glyceraldehyde-3-phosphate dehydrogenase 1 [OS=Saccharomyces cerevisiae S288c]                                                               | 853395 | TDH1; YJL052W    | metabolic process                                                                             | cytoplasm;cytosol;membrane;mitochondrion       | catalytic activity;nucleotide binding                                           | 1.721  | 1.462  | 0.85 |
| P53206 | putative cysteine synthase [OS=Saccharomyces cerevisiae S288c]                                                                               | 852895 | YGR012W; YGR012W | metabolic process                                                                             |                                                | catalytic activity                                                              | 1.346  | 1.154  | 0.86 |
| P07342 | Acetolactate synthase catalytic subunit, mitochondrial [OS=Saccharomyces cerevisiae S288c]                                                   | 855135 | ILV2; YMR108W    | metabolic process                                                                             | mitochondrion                                  | catalytic activity;metal ion binding;nucleotide binding                         | 4.223  | 3.642  | 0.86 |
| P21801 | Succinate dehydrogenase [ubiquinone] iron-sulfur subunit, mitochondrial [OS=Saccharomyces cerevisiae S288c]                                  | 850685 | SDH2; YLL041C    | metabolic process;transport                                                                   | membrane;mitochondrion                         | catalytic activity;metal ion binding                                            | 18.684 | 16.191 | 0.87 |
| P54783 | D-arabinono-1,4-lactone oxidase [OS=Saccharomyces cerevisiae S288c]                                                                          | 854888 | ALO1; YML086C    | metabolic process;response to stimulus                                                        | membrane;mitochondrion                         | catalytic activity;nucleotide binding                                           | 3.299  | 2.981  | 0.90 |
| P06168 | ketol-acid reductoisomerase, mitochondrial [OS=Saccharomyces cerevisiae S288c]                                                               | 851069 | ILV5; YLR355C    | cell organization and biogenesis;metabolic process                                            | mitochondrion                                  | catalytic activity;DNA binding;metal ion binding                                | 9      | 8.211  | 0.91 |
| P12695 | Dihydrolipoyllysine-residue acetyltransferase component of pyruvate dehydrogenase complex, mitochondrial [OS=Saccharomyces cerevisiae S288c] | 855653 | LAT1; YNL071W    | metabolic process                                                                             | mitochondrion;organelle lumen                  | catalytic activity                                                              | 5.898  | 5.404  | 0.92 |
| P16387 | Pyruvate dehydrogenase E1 component subunit alpha, mitochondrial [OS=Saccharomyces cerevisiae S288c]                                         | 856925 | PDA1; YER178W    | cell growth;metabolic process                                                                 | mitochondrion;organelle lumen                  | catalytic activity                                                              | 12.46  | 11.496 | 0.92 |
| P0CS90 | Heat shock protein SSC1, mitochondrial [OS=Saccharomyces cerevisiae S288c]                                                                   | 853503 | SSC1; YJR045C    | cell organization and biogenesis;metabolic process;regulation of biological process;transport | membrane;mitochondrion;nucleus;organelle lumen | catalytic activity;enzyme regulator activity;nucleotide binding;protein binding | 26.826 | 25.102 | 0.94 |
| P07257 | Cytochrome b-c1 complex subunit 2, mitochondrial [OS=Saccharomyces cerevisiae S288c]                                                         | 856321 | QCR2; YPR191W    | metabolic process;transport                                                                   | membrane;mitochondrion                         | catalytic activity;metal ion binding;protein binding;transporter activity       | 21.19  | 21.19  | 1.00 |
| P00560 | Phosphoglycerate kinase [OS=Saccharomyces cerevisiae S288c]                                                                                  | 850370 | PGK1; YCR012W    | metabolic process                                                                             | cytoplasm;membrane;mitochondrion               | catalytic activity;nucleotide binding                                           | 4.843  | 4.843  | 1.00 |
| Q01852 | Mitochondrial import inner membrane translocase subunit TIM44 [OS=Saccharomyces cerevisiae S288c]                                            | 854790 | TIM44; YIL022W   | transport                                                                                     | membrane;mitochondrion                         | nucleotide binding;protein binding                                              | 4.125  | 4.125  | 1.00 |
| P36060 | NADH-cytochrome b5 reductase 2 [OS=Saccharomyces cerevisiae S288c]                                                                           | 853707 | MCR1; YKL150W    | metabolic process;response to stimulus                                                        | membrane;mitochondrion                         | catalytic activity;protein binding                                              | 10.288 | 10.288 | 1.00 |

|        |                                                                                             |        |                      |                                                                                   |                                                      |                                                                                     |       |       |      |
|--------|---------------------------------------------------------------------------------------------|--------|----------------------|-----------------------------------------------------------------------------------|------------------------------------------------------|-------------------------------------------------------------------------------------|-------|-------|------|
| P28241 | Isocitrate dehydrogenase [NAD] subunit 2, mitochondrial [OS=Saccharomyces cerevisiae S288c] | 854303 | IDH2; YOR136W        | metabolic process                                                                 | mitochondrion;organelle lumen                        | catalytic activity;metal ion binding;nucleotide binding;protein binding;RNA binding | 4.179 | 4.179 | 1.00 |
| Q07651 | SUR7 family protein FMP45 [OS=Saccharomyces cerevisiae S288c]                               | 851304 | FMP45; YDL222C       | cell differentiation;cell organization and biogenesis                             | membrane;mitochondrion                               |                                                                                     | 6.017 | 6.017 | 1.00 |
| P09440 | C-1-tetrahydrofolate synthase, mitochondrial [OS=Saccharomyces cerevisiae S288c]            | 852378 | MIS1; YBR084W        | metabolic process                                                                 | cytosol;mitochondrion                                | catalytic activity;nucleotide binding                                               | 0.9   | 0.9   | 1.00 |
| P36148 | glycerol-3-phosphate O-acyltransferase 2 [OS=Saccharomyces cerevisiae S288c]                | 853941 | GPT2; YKR067W        | metabolic process                                                                 | cytoplasm;endoplasmic reticulum;membrane             | catalytic activity                                                                  | 1.116 | 1.116 | 1.00 |
| P32335 | Protein MSS51, mitochondrial [OS=Saccharomyces cerevisiae S288c]                            | 850900 | MSS51; YLR203C       | metabolic process;regulation of biological process                                | membrane;mitochondrion                               | protein binding;translation regulator activity                                      | 1.154 | 1.154 | 1.00 |
| P32332 | Mitochondrial oxaloacetate transport protein [OS=Saccharomyces cerevisiae S288c]            | 853739 | OAC1; YKL120W        | metabolic process;transport                                                       | membrane;mitochondrion                               | structural molecule activity;transporter activity                                   | 2.594 | 2.594 | 1.00 |
| P53721 | Respiratory supercomplex factor 2, mitochondrial [OS=Saccharomyces cerevisiae S288c]        | 855752 | RCF2; YNR018W        | cell organization and biogenesis                                                  | membrane;mitochondrion                               |                                                                                     | 7.111 | 7.111 | 1.00 |
| P38325 | Mitochondrial outer membrane protein OM14 [OS=Saccharomyces cerevisiae S288c]               | 852531 | OM14; YBR230C        | transport                                                                         | membrane;mitochondrion                               |                                                                                     | 6.197 | 6.197 | 1.00 |
| P38626 | NADH-cytochrome b5 reductase 1 [OS=Saccharomyces cerevisiae S288c]                          | 854768 | CBR1; YIL043C        | metabolic process                                                                 | endoplasmic reticulum;membrane;mitochondrion;nucleus | catalytic activity                                                                  | 1.61  | 1.61  | 1.00 |
| P40364 | Mitochondrial peculiar membrane protein 1 [OS=Saccharomyces cerevisiae S288c]               | 853379 | MPM1; YJL066C        | membrane;mitochondrion                                                            |                                                      |                                                                                     | 1.512 | 1.512 | 1.00 |
| P32266 | Dynammin-like GTPase MGM1, mitochondrial [OS=Saccharomyces cerevisiae S288c]                | 854386 | MGM1; YOR211C        | cell organization and biogenesis                                                  | membrane;mitochondrion                               | catalytic activity;nucleotide binding;protein binding                               | 0.389 | 0.389 | 1.00 |
| P32331 | Carrier protein YMC1, mitochondrial [OS=Saccharomyces cerevisiae S288c]                     | 856171 | YMC1; YPR058W        | metabolic process;transport                                                       | membrane;mitochondrion;vacuole                       | structural molecule activity;transporter activity                                   | 1.254 | 1.254 | 1.00 |
| Q06493 | LETM1 domain-containing protein YLH47, mitochondrial [OS=Saccharomyces cerevisiae S288c]    | 856243 | YLH47; YPR125W       | cell organization and biogenesis;transport                                        | membrane;mitochondrion                               |                                                                                     | 0.61  | 0.61  | 1.00 |
| P38072 | Protein SCO2, mitochondrial [OS=Saccharomyces cerevisiae S288c]                             | 852312 | SCO2; YBR024W        | cell organization and biogenesis;cellular homeostasis;metabolic process;transport | membrane;mitochondrion                               | antioxidant activity;catalytic activity;metal ion binding                           | 0.73  | 0.73  | 1.00 |
| P21375 | Fumarate reductase 2 [OS=Saccharomyces cerevisiae S288c]                                    | 853510 | OSM1; YJR051W        | metabolic process                                                                 | endoplasmic reticulum;mitochondrion                  | catalytic activity;nucleotide binding                                               | 0.346 | 0.346 | 1.00 |
| Q03976 | 37S ribosomal protein S24, mitochondrial [OS=Saccharomyces cerevisiae S288c]                | 851755 | RSM24; YDR175C       | cell organization and biogenesis;metabolic process                                | mitochondrion;ribosome                               | structural molecule activity                                                        | 0.585 | 0.585 | 1.00 |
| P27697 | Atypical kinase COQ8, mitochondrial [OS=Saccharomyces cerevisiae S288c]                     | 852758 | COQ8; YGL119W        | metabolic process                                                                 | membrane;mitochondrion;organelle lumen               | catalytic activity;nucleotide binding                                               | 0.365 | 0.365 | 1.00 |
| Q99297 | Mitochondrial 2-oxodicarboxylate carrier 2 [OS=Saccharomyces cerevisiae S288c]              | 854397 | ODC2; YOR222W        | metabolic process;transport                                                       | membrane;mitochondrion                               | structural molecule activity;transporter activity                                   | 0.778 | 0.778 | 1.00 |
| Q06485 | Autophagy-related protein 33 [OS=Saccharomyces cerevisiae S288c]                            | 851070 | ATG33; YLR356W       | cell communication;metabolic process;response to stimulus                         | membrane;mitochondrion                               |                                                                                     | 1.371 | 1.371 | 1.00 |
| P50087 | MICOS subunit MIC26 [OS=Saccharomyces cerevisiae S288c]                                     | 853150 | MOS2; MIC26; YGR235C | cell organization and biogenesis                                                  | membrane;mitochondrion                               |                                                                                     | 0.931 | 0.931 | 1.00 |
| Q12298 | uncharacterized ABC transporter ATP-binding protein YDR061W [OS=Saccharomyces               | 851633 | YDR061W; YDR061W     | mitochondrion                                                                     |                                                      | catalytic activity;nucleotide binding                                               | 0.266 | 0.266 | 1.00 |

|        |                                                                                                                |         |                      |                                                                                     |                                                 |                                                                         |       |       |      |
|--------|----------------------------------------------------------------------------------------------------------------|---------|----------------------|-------------------------------------------------------------------------------------|-------------------------------------------------|-------------------------------------------------------------------------|-------|-------|------|
|        | cerevisiae S288c]                                                                                              |         |                      |                                                                                     |                                                 |                                                                         |       |       |      |
| Q02883 | N-acyl-phosphatidylethanolamine-hydrolyzing phospholipase D, mitochondrial [OS=Saccharomyces cerevisiae S288c] | 856001  | FMP30; YPL103C       | metabolic process                                                                   | membrane;mitochondrion                          | catalytic activity;metal ion binding                                    | 0.304 | 0.304 | 1.00 |
| P34224 | Uncharacterized protein YBL059W [OS=Saccharomyces cerevisiae S288c]                                            | 852221  | YBL059W; YBL059W     | membrane;mitochondrion                                                              |                                                 |                                                                         | 0.468 | 0.468 | 1.00 |
| P34222 | Peptidyl-tRNA hydrolase 2 [OS=Saccharomyces cerevisiae S288c]                                                  | 852223  | PTH2; YBL057C        | regulation of biological process                                                    | cytoplasm;cytosol;membrane;mitochondrion        | catalytic activity;protein binding                                      | 0.425 | 0.425 | 1.00 |
| P38122 | 3-methyl-2-oxobutanoate hydroxymethyltransferase [OS=Saccharomyces cerevisiae S288c]                           | 852474  | ECM31; YBR176W       | metabolic process                                                                   | mitochondrion                                   | catalytic activity                                                      | 0.259 | 0.259 | 1.00 |
| Q06510 | Lysophosphatidylcholine acyltransferase [OS=Saccharomyces cerevisiae S288c]                                    | 856262  | TAZ1; YPR140W        | cell organization and biogenesis;metabolic process;transport                        | membrane;mitochondrion                          | catalytic activity                                                      | 0.194 | 0.194 | 1.00 |
| Q06405 | ATP synthase subunit f, mitochondrial [OS=Saccharomyces cerevisiae S288c]                                      | 851983  | ATP17; YDR377W       | metabolic process;transport                                                         | membrane;mitochondrion                          | catalytic activity;transporter activity                                 | 2.981 | 2.981 | 1.00 |
| Q3E6R5 | uncharacterized mitochondrial outer membrane protein YDR381C-A [OS=Saccharomyces cerevisiae S288c]             | 851989  | YDR381C-A; YDR381C-A | membrane;mitochondrion                                                              |                                                 |                                                                         | 0.389 | 0.389 | 1.00 |
| Q05867 | Uncharacterized protein YLR283W, mitochondrial [OS=Saccharomyces cerevisiae S288c]                             | 850988  | YLR283W; YLR283W     | endoplasmic reticulum;membrane;mitochondrion                                        |                                                 |                                                                         | 0.11  | 0.11  | 1.00 |
| Q2V2P9 | Uncharacterized protein YDR119W-A [OS=Saccharomyces cerevisiae S288c]                                          | 3799970 | COX26; YDR119W-A     | membrane;mitochondrion                                                              |                                                 |                                                                         | 1.154 | 1.154 | 1.00 |
| P48526 | Isoleucine-tRNA ligase, mitochondrial [OS=Saccharomyces cerevisiae S288c]                                      | 856067  | ISM1; YPL040C        | cell organization and biogenesis;metabolic process;regulation of biological process | cytoplasm;cytosol;mitochondrion;organelle lumen | catalytic activity;nucleotide binding                                   | 0.04  | 0.04  | 1.00 |
| P32378 | 4-hydroxybenzoate polyprenyltransferase, mitochondrial [OS=Saccharomyces cerevisiae S288c]                     | 855778  | COQ2; YNR041C        | metabolic process;transport                                                         | membrane;mitochondrion                          | catalytic activity                                                      | 0.292 | 0.292 | 1.00 |
| P38909 | cytochrome c mitochondrial import factor CYC2 [OS=Saccharomyces cerevisiae S288c]                              | 854202  | CYC2; YOR037W        | cell organization and biogenesis;metabolic process                                  | membrane;mitochondrion                          | catalytic activity                                                      | 0.194 | 0.194 | 1.00 |
| P36064 | COX assembly mitochondrial protein [OS=Saccharomyces cerevisiae S288c]                                         | 853721  | CMC1; YKL137W        | cell organization and biogenesis                                                    | membrane;mitochondrion                          | metal ion binding                                                       | 0.389 | 0.389 | 1.00 |
| P32463 | Acyl carrier protein, mitochondrial [OS=Saccharomyces cerevisiae S288c]                                        | 853642  | ACP1; YKL192C        | metabolic process;transport                                                         | mitochondrion                                   |                                                                         | 0.259 | 0.259 | 1.00 |
| P04039 | Cytochrome c oxidase polypeptide VIII, mitochondrial [OS=Saccharomyces cerevisiae S288c]                       | 851111  | COX8; YLR395C        | metabolic process;transport                                                         | membrane;mitochondrion                          | catalytic activity;transporter activity                                 | 0.778 | 0.778 | 1.00 |
| P39103 | Cytochrome c oxidase assembly protein COX14 [OS=Saccharomyces cerevisiae S288c]                                | 854910  | COX14; YML129C       | cell organization and biogenesis;regulation of biological process                   | membrane;mitochondrion;organelle lumen          | protein binding                                                         | 0.585 | 0.585 | 1.00 |
| Q00873 | cytochrome c1 heme lyase [OS=Saccharomyces cerevisiae S288c]                                                   | 853775  | CYT2; YKL087C        | cell organization and biogenesis;metabolic process                                  | membrane;mitochondrion                          | catalytic activity;metal ion binding                                    | 0.359 | 0.359 | 1.00 |
| P53320 | Mitochondrial carrier protein MTM1 [OS=Saccharomyces cerevisiae S288c]                                         | 853173  | MTM1; YGR257C        | metabolic process;transport                                                         | membrane;mitochondrion                          | structural molecule activity                                            | 0.11  | 0.11  | 1.00 |
| P40341 | Mitochondrial respiratory chain complexes assembly protein YTA12 [OS=Saccharomyces cerevisiae S288c]           | 855114  | YTA12; YMR089C       | cell organization and biogenesis;metabolic process;response to stimulus;transport   | cytoplasm;membrane;mitochondrion                | catalytic activity;metal ion binding;nucleotide binding;protein binding | 1.184 | 1.276 | 1.08 |
| P32795 | Mitochondrial inner membrane i-AAA                                                                             | 856135  | YME1; YPR024W        | metabolic process;response to                                                       | membrane;mitochondrion                          | catalytic activity;metal                                                | 1.3   | 1.415 | 1.09 |

|        |                                                                                                                      |        |                |                                                                                                                           |                                                   |                                                            |         |         |      |
|--------|----------------------------------------------------------------------------------------------------------------------|--------|----------------|---------------------------------------------------------------------------------------------------------------------------|---------------------------------------------------|------------------------------------------------------------|---------|---------|------|
|        | protease supercomplex subunit YME1 [OS=Saccharomyces cerevisiae S288c]                                               |        |                | stimulus;transport                                                                                                        |                                                   | ion binding;nucleotide binding;protein binding             |         |         |      |
| P16547 | Mitochondrial outer membrane protein OM45 [OS=Saccharomyces cerevisiae S288c]                                        | 854670 | OM45; YIL136W  | membrane;mitochondrion                                                                                                    |                                                   |                                                            | 300.995 | 330.131 | 1.10 |
| Q12466 | tricalbin-1 [OS=Saccharomyces cerevisiae S288c]                                                                      | 854253 | TCB1; YOR086C  | cell organization and biogenesis;regulation of biological process                                                         | endoplasmic reticulum;membrane;mitochondrion      | metal ion binding;protein binding                          | 0.52    | 0.574   | 1.10 |
| P17505 | Malate dehydrogenase, mitochondrial [OS=Saccharomyces cerevisiae S288c]                                              | 853777 | MDH1; YKL085W  | metabolic process                                                                                                         | mitochondrion;organelle lumen                     | catalytic activity;protein binding;RNA binding             | 28.936  | 32.405  | 1.12 |
| P16622 | Ferrochelatase, mitochondrial [OS=Saccharomyces cerevisiae S288c]                                                    | 854347 | HEM15; YOR176W | metabolic process                                                                                                         | membrane;mitochondrion                            | catalytic activity                                         | 4.337   | 4.926   | 1.14 |
| P49367 | Homoaconitase, mitochondrial [OS=Saccharomyces cerevisiae S288c]                                                     | 851820 | LYS4; YDR234W  | metabolic process                                                                                                         | mitochondrion                                     | catalytic activity;metal ion binding;protein binding       | 0.638   | 0.73    | 1.14 |
| Q08822 | Probable electron transfer flavoprotein-ubiquinone oxidoreductase, mitochondrial [OS=Saccharomyces cerevisiae S288c] | 854538 | CIR2; YOR356W  | metabolic process;transport                                                                                               | membrane;mitochondrion                            | catalytic activity;metal ion binding;nucleotide binding    | 2.162   | 2.481   | 1.15 |
| P25087 | Sterol 24-C-methyltransferase [OS=Saccharomyces cerevisiae S288c]                                                    | 855003 | ERG6; YML008C  | metabolic process                                                                                                         | endoplasmic reticulum;membrane;mitochondrion      | catalytic activity                                         | 1.424   | 1.649   | 1.16 |
| Q12482 | Mitochondrial aspartate-glutamate transporter AGC1 [OS=Saccharomyces cerevisiae S288c]                               | 856132 | AGC1; YPR021C  | metabolic process;transport                                                                                               | membrane;mitochondrion                            | structural molecule activity;transporter activity          | 0.348   | 0.407   | 1.17 |
| P07213 | Mitochondrial import receptor subunit TOM70 [OS=Saccharomyces cerevisiae S288c]                                      | 855602 | TOM70; YNL121C | cell organization and biogenesis;transport                                                                                | membrane;mitochondrion                            | protein binding;transporter activity                       | 2.665   | 3.125   | 1.17 |
| Q00402 | Nuclear migration protein NUM1 [OS=Saccharomyces cerevisiae S288c]                                                   | 851727 | NUM1; YDR150W  | cell organization and biogenesis;cellular component movement;metabolic process;regulation of biological process;transport | endoplasmic reticulum;mitochondrion               | catalytic activity;motor activity;protein binding          | 0.065   | 0.078   | 1.20 |
| P33310 | ATP-dependent permease MDL1, mitochondrial [OS=Saccharomyces cerevisiae S288c]                                       | 850885 | MDL1; YLR188W  | transport                                                                                                                 | membrane;mitochondrion                            | catalytic activity;nucleotide binding;transporter activity | 0.438   | 0.528   | 1.21 |
| P07143 | Cytochrome c1, heme protein, mitochondrial [OS=Saccharomyces cerevisiae S288c]                                       | 854231 | CYT1; YOR065W  | metabolic process;transport                                                                                               | cytosol;membrane;mitochondrion                    | metal ion binding                                          | 13.251  | 16.013  | 1.21 |
| P20967 | 2-oxoglutarate dehydrogenase, mitochondrial [OS=Saccharomyces cerevisiae S288c]                                      | 854681 | KGD1; YIL125W  | metabolic process                                                                                                         | cytosol;mitochondrion;organelle lumen             | catalytic activity                                         | 8.168   | 9.908   | 1.21 |
| P00358 | glyceraldehyde-3-phosphate dehydrogenase 2 [OS=Saccharomyces cerevisiae S288c]                                       | 853465 | TDH2; YJR009C  | cell death;metabolic process                                                                                              | cytoplasm;cytosol;membrane;mitochondrion; nucleus | catalytic activity;nucleotide binding;protein binding      | 3.489   | 4.484   | 1.29 |
| P04840 | Mitochondrial outer membrane protein porin 1 [OS=Saccharomyces cerevisiae S288c]                                     | 855669 | POR1; YNL055C  | cell death;cell organization and biogenesis;cellular homeostasis;regulation of biological process;transport               | cytoplasm;membrane;mitochondrion                  | transporter activity                                       | 15.238  | 19.691  | 1.29 |
| P53230 | Phosphatidate cytidyltransferase, mitochondrial [OS=Saccharomyces cerevisiae S288c]                                  | 852937 | TAM41; YGR046W | metabolic process                                                                                                         | membrane;mitochondrion;organelle lumen            | catalytic activity                                         | 0.407   | 0.532   | 1.31 |
| Q02776 | Mitochondrial import inner membrane translocase subunit TIM50 [OS=Saccharomyces cerevisiae S288c]                    | 856042 | TIM50; YPL063W | cell organization and biogenesis;metabolic process;transport                                                              | membrane;mitochondrion                            | catalytic activity;protein binding;transporter activity    | 7.483   | 9.857   | 1.32 |
| P28737 | Protein MSP1 [OS=Saccharomyces                                                                                       | 852915 | MSP1; YGR028W  | cell organization and biogenesis;metabolic                                                                                | membrane;mitochondrion;nucleus                    | catalytic activity;nucleoti                                | 0.585   | 0.778   | 1.33 |



|        |                                                                                           |        |                |                                                                                                  |                                                                |                                                               |       |        |      |
|--------|-------------------------------------------------------------------------------------------|--------|----------------|--------------------------------------------------------------------------------------------------|----------------------------------------------------------------|---------------------------------------------------------------|-------|--------|------|
|        | cerevisiae S288c]                                                                         |        |                | process;regulation of biological process;response to stimulus;transport                          |                                                                | de binding;protein binding;RNA binding                        |       |        |      |
| P33303 | Succinate/fumarate mitochondrial transporter [OS=Saccharomyces cerevisiae S288c]          | 853558 | SFC1; YJR095W  | metabolic process;transport                                                                      | membrane;mitochondrion                                         | structural molecule activity;transporter activity             | 6.743 | 9      | 1.33 |
| P39722 | Mitochondrial Rho GTPase 1 [OS=Saccharomyces cerevisiae S288c]                            | 851249 | GEM1; YAL048C  | cell organization and biogenesis;regulation of biological process;response to stimulus;transport | membrane;mitochondrion                                         | catalytic activity;metal ion binding;nucleotide binding       | 0.189 | 0.259  | 1.37 |
| P25039 | Elongation factor G, mitochondrial [OS=Saccharomyces cerevisiae S288c]                    | 850758 | MEF1; YLR069C  | cell organization and biogenesis;metabolic process                                               | cytosol;mitochondrion                                          | catalytic activity;nucleotide binding;RNA binding             | 0.151 | 0.207  | 1.37 |
| Q04013 | Citrate/oxoglutarate carrier protein [OS=Saccharomyces cerevisiae S288c]                  | 855282 | YHM2; YMR241W  | cell organization and biogenesis;metabolic process;transport                                     | membrane;mitochondrion                                         | DNA binding;structural molecule activity;transporter activity | 2.162 | 2.981  | 1.38 |
| P05626 | ATP synthase subunit 4, mitochondrial [OS=Saccharomyces cerevisiae S288c]                 | 856027 | ATP4; YPL078C  | cell organization and biogenesis;metabolic process;transport                                     | membrane;mitochondrion                                         | catalytic activity;transporter activity                       | 3.084 | 4.275  | 1.39 |
| Q04172 | Sensitive to high expression protein 9, mitochondrial [OS=Saccharomyces cerevisiae S288c] | 852002 | SHE9; YDR393W  | cell organization and biogenesis                                                                 | membrane;mitochondrion                                         |                                                               | 0.269 | 0.374  | 1.39 |
| P38077 | ATP synthase subunit gamma, mitochondrial [OS=Saccharomyces cerevisiae S288c]             | 852327 | ATP3; YBR039W  | metabolic process;transport                                                                      | membrane;mitochondrion                                         | catalytic activity;transporter activity                       | 9     | 12.689 | 1.41 |
| P00424 | Cytochrome c oxidase polypeptide 5A, mitochondrial [OS=Saccharomyces cerevisiae S288c]    | 855675 | COX5A; YNL052W | metabolic process;transport                                                                      | membrane;mitochondrion                                         | catalytic activity;transporter activity                       | 1.31  | 1.848  | 1.41 |
| P33759 | 37S ribosomal protein S5, mitochondrial [OS=Saccharomyces cerevisiae S288c]               | 852553 | MRP55; YBR251W | cell organization and biogenesis;metabolic process                                               | mitochondrion;ribosome                                         | RNA binding;structural molecule activity                      | 0.413 | 0.585  | 1.42 |
| Q08179 | Mitochondrial distribution and morphology protein 38 [OS=Saccharomyces cerevisiae S288c]  | 854130 | MDM38; YOL027C | cell organization and biogenesis;cellular homeostasis;regulation of biological process;transport | membrane;mitochondrion                                         |                                                               | 3.732 | 5.31   | 1.42 |
| P40495 | Homoisocitrate dehydrogenase, mitochondrial [OS=Saccharomyces cerevisiae S288c]           | 854714 | LYS12; YIL094C | metabolic process                                                                                | mitochondrion                                                  | catalytic activity;metal ion binding;nucleotide binding       | 3.217 | 4.623  | 1.44 |
| P08466 | mitochondrial nuclease [OS=Saccharomyces cerevisiae S288c]                                | 853222 | NUC1; YJL208C  | cell death;metabolic process                                                                     | membrane;mitochondrion;nucleus                                 | catalytic activity;metal ion binding                          | 1.336 | 1.976  | 1.48 |
| P00950 | Phosphoglycerate mutase 1 [OS=Saccharomyces cerevisiae S288c]                             | 853705 | GPM1; YKL152C  | metabolic process;regulation of biological process                                               | cytoplasm;cytosol;membrane;mitochondrion                       | catalytic activity                                            | 2.981 | 4.412  | 1.48 |
| P39518 | Long-chain-fatty-acid--CoA ligase 2 [OS=Saccharomyces cerevisiae S288c]                   | 856734 | FAA2; YER015W  | metabolic process;transport                                                                      | cytoplasm;mitochondrion                                        | catalytic activity;nucleotide binding                         | 0.535 | 0.802  | 1.50 |
| P25349 | Flavoprotein-like protein YCP4 [OS=Saccharomyces cerevisiae S288c]                        | 850360 | YCP4; YCR004C  | metabolic process;regulation of biological process                                               | cytoplasm;membrane;mitochondrion                               | catalytic activity;nucleotide binding;protein binding         | 5.813 | 9      | 1.55 |
| P16603 | NADPH--cytochrome P450 reductase [OS=Saccharomyces cerevisiae S288c]                      | 856438 | NCP1; YHR042W  | metabolic process                                                                                | cytoplasm;cytosol;endoplasmic reticulum;membrane;mitochondrion | catalytic activity;metal ion binding;nucleotide binding       | 0.512 | 0.805  | 1.57 |
| P29704 | squalene synthase [OS=Saccharomyces cerevisiae S288c]                                     | 856597 | ERG9; YHR190W  | metabolic process                                                                                | endoplasmic reticulum;membrane;mitochondrion                   | catalytic activity                                            | 0.222 | 0.35   | 1.58 |
| Q03028 | Mitochondrial 2-oxodicarboxylate carrier 1 [OS=Saccharomyces cerevisiae S288c]            | 855969 | ODC1; YPL134C  | metabolic process;transport                                                                      | membrane;mitochondrion                                         | structural molecule activity;transporter activity             | 4.275 | 6.743  | 1.58 |
| Q99190 | Very-long-chain enoyl-CoA reductase [OS=Saccharomyces cerevisiae S288c]                   | 851547 | TSC13; YDL015C | metabolic process                                                                                | cytoplasm;endoplasmic reticulum;membrane;mitochondrion         | catalytic activity;protein binding                            | 0.311 | 0.501  | 1.61 |
| P14540 | fructose-bisphosphate aldolase [OS=Saccharomyces cerevisiae S288c]                        | 853805 | FBA1; YKL060C  | metabolic process                                                                                | cytoplasm;cytosol;membrane;mitochondrion                       | catalytic activity;metal ion binding                          | 0.896 | 1.448  | 1.62 |

|        |                                                                                                   |        |                        |                                                                                                                                       |                                                          |                                                                   |        |        |      |
|--------|---------------------------------------------------------------------------------------------------|--------|------------------------|---------------------------------------------------------------------------------------------------------------------------------------|----------------------------------------------------------|-------------------------------------------------------------------|--------|--------|------|
| P22136 | ATPase expression protein 2, mitochondrial [OS=Saccharomyces cerevisiae S288c]                    | 855325 | AEP2; YMR282C          | metabolic process;regulation of biological process                                                                                    | mitochondrion                                            | RNA binding                                                       | 0.359  | 0.585  | 1.63 |
| P00942 | Triosephosphate isomerase [OS=Saccharomyces cerevisiae S288c]                                     | 851620 | TPI1; YDR050C          | metabolic process                                                                                                                     | cytoplasm;cytosol;membrane;mitochondrion                 | catalytic activity                                                | 0.425  | 0.701  | 1.65 |
| Q05050 | Eisosome protein 1 [OS=Saccharomyces cerevisiae S288c]                                            | 855047 | EIS1; YMR031C          | cell organization and biogenesis;metabolic process;transport                                                                          | cytoplasm;extracellular;membrane;mitochondrion           |                                                                   | 0.661  | 1.099  | 1.66 |
| P53163 | 54S ribosomal protein L12, mitochondrial [OS=Saccharomyces cerevisiae S288c]                      | 852811 | MNP1; YGL068W          | cell organization and biogenesis;metabolic process                                                                                    | mitochondrion;ribosome                                   | RNA binding;structural molecule activity                          | 0.52   | 0.874  | 1.68 |
| P00890 | citrate synthase, mitochondrial [OS=Saccharomyces cerevisiae S288c]                               | 855732 | CIT1; YNR001C          | metabolic process;transport                                                                                                           | cytosol;mitochondrion;organelle lumen                    | catalytic activity                                                | 8.211  | 14.086 | 1.72 |
| P38988 | Mitochondrial GTP/GDP carrier protein 1 [OS=Saccharomyces cerevisiae S288c]                       | 851329 | GGC1; YDL198C          | cell organization and biogenesis;cellular homeostasis;metabolic process;transport                                                     | membrane;mitochondrion                                   | structural molecule activity;transporter activity                 | 3.16   | 5.449  | 1.72 |
| P39515 | mitochondrial import inner membrane translocase subunit Tim17 [OS=Saccharomyces cerevisiae S288c] | 853298 | TIM17; YJL143W         | cell organization and biogenesis;transport                                                                                            | membrane;mitochondrion                                   | protein binding;transporter activity                              | 0.778  | 1.371  | 1.76 |
| Q12289 | mitochondrial carnitine carrier [OS=Saccharomyces cerevisiae S288c]                               | 854267 | CRC1; YOR100C          | metabolic process;transport                                                                                                           | membrane;mitochondrion                                   | structural molecule activity;transporter activity                 | 0.931  | 1.683  | 1.81 |
| P15992 | heat shock protein 26 [OS=Saccharomyces cerevisiae S288c]                                         | 852364 | HSP26; YBR072W         | metabolic process;response to stimulus                                                                                                | cytoplasm;mitochondrion;nucleus                          | protein binding;RNA binding                                       | 4.878  | 9      | 1.85 |
| Q03327 | Mitochondrial fusion and transport protein Ugo1 [OS=Saccharomyces cerevisiae S288c]               | 852081 | UGO1; YDR470C          | cell organization and biogenesis;metabolic process                                                                                    | membrane;mitochondrion                                   | protein binding;structural molecule activity                      | 0.557  | 1.031  | 1.85 |
| P18239 | ADP,ATP carrier protein 2 [OS=Saccharomyces cerevisiae S288c]                                     | 852250 | PET9; YBL030C          | cell death;metabolic process;transport                                                                                                | membrane;mitochondrion                                   | structural molecule activity;transporter activity                 | 47.064 | 89.063 | 1.89 |
| P25613 | Accumulation of dyads protein 2 [OS=Saccharomyces cerevisiae S288c]                               | 850368 | ADY2; YCR010C          | transport                                                                                                                             | membrane;mitochondrion                                   | transporter activity                                              | 9      | 18.307 | 2.03 |
| P53252 | sphingolipid long chain base-responsive protein PIL1 [OS=Saccharomyces cerevisiae S288c]          | 852977 | PIL1; YGR086C          | cell organization and biogenesis;regulation of biological process;response to stimulus;transport                                      | cytoplasm;membrane;mitochondrion                         | protein binding                                                   | 10.45  | 21.539 | 2.06 |
| P34231 | Uncharacterized protein YKL187C [OS=Saccharomyces cerevisiae S288c]                               | 853648 | FAT3; YKL187C; YKL187C | cell organization and biogenesis;transport                                                                                            | membrane;mitochondrion                                   |                                                                   | 0.093  | 0.194  | 2.09 |
| P09368 | Proline dehydrogenase, mitochondrial [OS=Saccharomyces cerevisiae S288c]                          | 850833 | PUT1; YLR142W          | metabolic process                                                                                                                     | mitochondrion;organelle lumen                            | catalytic activity                                                | 0.093  | 0.194  | 2.09 |
| P43603 | LAS seventeen-binding protein 3 [OS=Saccharomyces cerevisiae S288c]                               | 850580 | LSB3; YFR024C-A        | cell organization and biogenesis;regulation of biological process                                                                     | cytoplasm;mitochondrion                                  | protein binding                                                   | 0.089  | 0.186  | 2.09 |
| P32939 | GTP-binding protein ypt7 [OS=Saccharomyces cerevisiae S288c]                                      | 855012 | YPT7; YML001W          | cell communication;cell organization and biogenesis;metabolic process;regulation of biological process;response to stimulus;transport | cytosol;endosome;membrane;mitochondrion;vacuole          | catalytic activity;nucleotide binding;protein binding             | 0.166  | 0.359  | 2.16 |
| P54857 | lipase 2 [OS=Saccharomyces cerevisiae S288c]                                                      | 851628 | TGL2; YDR058C          | metabolic process;transport                                                                                                           | mitochondrion                                            | catalytic activity                                                | 0.233  | 0.52   | 2.23 |
| P49334 | Mitochondrial import receptor subunit tom22 [OS=Saccharomyces cerevisiae S288c]                   | 855592 | TOM22; YNL131W         | cell organization and biogenesis;transport                                                                                            | membrane;mitochondrion                                   | protein binding;transporter activity                              | 0.292  | 0.668  | 2.29 |
| P19882 | heat shock protein 60, mitochondrial [OS=Saccharomyces cerevisiae S288c]                          | 850963 | HSP60; YLR259C         | cell organization and biogenesis;metabolic process;regulation of biological process;transport                                         | cytoplasm;cytosol;membrane;mitochondrion;organelle lumen | catalytic activity;DNA binding;nucleotide binding;protein binding | 13.384 | 32.598 | 2.44 |
| Q08245 | protein ZEO1 [OS=Saccharomyces cerevisiae S288c]                                                  | 854040 | ZEO1; YOL109W          | cell organization and biogenesis                                                                                                      | membrane;mitochondrion                                   | protein binding                                                   | 2.162  | 5.31   | 2.46 |
| Q12230 | Sphingolipid long chain base-responsive protein LSP1 [OS=Saccharomyces                            | 856103 | LSP1; YPL004C          | regulation of biological process;response to stimulus;transport                                                                       | cytoplasm;membrane;mitochondrion                         |                                                                   | 24.119 | 62.096 | 2.57 |

|        |                                                                                  |            |                |                                                              |                                                                |                                                         |       |       |      |
|--------|----------------------------------------------------------------------------------|------------|----------------|--------------------------------------------------------------|----------------------------------------------------------------|---------------------------------------------------------|-------|-------|------|
|        | cerevisiae S288c]                                                                |            |                |                                                              |                                                                |                                                         |       |       |      |
| P12709 | glucose-6-phosphate isomerase<br>[OS=Saccharomyces cerevisiae S288c]             | 85249<br>5 | PGI1; YBR196C  | metabolic process                                            | cytoplasm;membrane;mitochondrion                               | catalytic activity                                      | 0.166 | 0.468 | 2.82 |
| P39952 | Mitochondrial inner membrane protein OXA1<br>[OS=Saccharomyces cerevisiae S288c] | 85689<br>8 | OXA1; YER154W  | cell organization and biogenesis;transport                   | membrane;mitochondrion                                         | transporter activity                                    | 1.054 | 3.217 | 3.05 |
| P50110 | Sorting assembly machinery 37 kDa subunit<br>[OS=Saccharomyces cerevisiae S288c] | 85508<br>2 | SAM37; YMR060C | cell organization and biogenesis;transport                   | membrane;mitochondrion                                         | protein binding                                         | 0.116 | 0.389 | 3.35 |
| P04803 | Tryptophan--tRNA ligase, mitochondrial<br>[OS=Saccharomyces cerevisiae S288c]    | 85186<br>1 | MSW1; YDR268W  | metabolic process                                            | cytoplasm;mitochondrion;organelle lumen                        | catalytic activity;nucleotide binding                   | 0.136 | 0.468 | 3.44 |
| Q00955 | Acetyl-CoA carboxylase<br>[OS=Saccharomyces cerevisiae S288c]                    | 85575<br>0 | ACC1; YNR016C  | cell organization and biogenesis;metabolic process;transport | cytoplasm;cytosol;endoplasmic reticulum;membrane;mitochondrion | catalytic activity;metal ion binding;nucleotide binding | 0.032 | 0.271 | 8.47 |

**Supplemental Table S13. The relative concentrations of proteins in mitochondria purified from *ups2Δ* cells cultured with or without LCA.** Mitochondria were purified from *ups2Δ* cells recovered on day 2 of cell culturing with or without LCA. Mass spectrometry-based identification and quantitation of proteins recovered in purified mitochondria were performed as described in Materials and methods. The exponentially modified protein abundance index (emPAI) provided by the "Proteome Discoverer" software was used to calculate the relative abundance of mitochondrial proteins between specified datasets. Data on the relative concentrations of mitochondrial proteins are presented as means of 2 independent experiments.

| Accession | Description                                                                                      | Entre<br>z<br>Gene<br>ID | Gene<br>ID          | Biological Process                                                                                                            | Cellular Component                       | Molecular Function                                                          | emP<br>AI<br><i>ups2</i> | emP<br>AI<br><i>ups2</i><br>+ LCA | Ratio<br><i>ups2</i><br>+ LCA<br>/ <i>ups2</i> |
|-----------|--------------------------------------------------------------------------------------------------|--------------------------|---------------------|-------------------------------------------------------------------------------------------------------------------------------|------------------------------------------|-----------------------------------------------------------------------------|--------------------------|-----------------------------------|------------------------------------------------|
| P40513    | Mitochondrial acidic protein MAM33 [OS=Saccharomyces cerevisiae S288c]                           | 854740                   | MAM33;<br>Y1L070C   | metabolic process;regulation of biological process                                                                            | mitochondrion;organelle lumen            | translation regulator activity                                              | 0.778                    | 0.212                             | 0.27                                           |
| P17558    | 37S ribosomal protein PET123, mitochondrial [OS=Saccharomyces cerevisiae S288c]                  | 854329                   | PET123;<br>YOR158W  | cell organization and biogenesis;metabolic process                                                                            | mitochondrion;ribosome                   | structural molecule activity                                                | 0.468                    | 0.136                             | 0.29                                           |
| P46681    | D-lactate dehydrogenase [cytochrome] 2, mitochondrial [OS=Saccharomyces cerevisiae S288c]        | 851376                   | DLD2;<br>YDL178W    | metabolic process                                                                                                             | mitochondrion;organelle lumen            | catalytic activity;nucleotide binding;protein binding                       | 0.682                    | 0.25                              | 0.37                                           |
| P32387    | 54S ribosomal protein L41, mitochondrial [OS=Saccharomyces cerevisiae S288c]                     | 852014                   | MRP20;<br>YDR405W   | cell organization and biogenesis;metabolic process                                                                            | mitochondrion;ribosome                   | nucleotide binding;protein binding;RNA binding;structural molecule activity | 0.719                    | 0.311                             | 0.43                                           |
| P25372    | Thioredoxin-3, mitochondrial [OS=Saccharomyces cerevisiae S288c]                                 | 850444                   | TRX3;<br>YCR083W    | cellular homeostasis;metabolic process;regulation of biological process;response to stimulus;transport                        | cytoplasm;mitochondrion                  | catalytic activity                                                          | 0.52                     | 0.233                             | 0.45                                           |
| P00445    | Superoxide dismutase [Cu-Zn] [OS=Saccharomyces cerevisiae S288c]                                 | 853568                   | SOD1;<br>YJR104C    | cell organization and biogenesis;cellular homeostasis;metabolic process;regulation of biological process;response to stimulus | cytoplasm;cytosol;mitochondrion;nucleus  | antioxidant activity;catalytic activity;metal ion binding;protein binding   | 0.52                     | 0.233                             | 0.45                                           |
| P14693    | sorting assembly machinery 35 kDa subunit [OS=Saccharomyces cerevisiae S288c]                    | 856483                   | SAM35;<br>YHR083W   | cell organization and biogenesis;transport                                                                                    | membrane;mitochondrion                   | protein binding                                                             | 0.334                    | 0.155                             | 0.46                                           |
| Q12298    | uncharacterized ABC transporter ATP-binding protein YDR061W [OS=Saccharomyces cerevisiae S288c]  | 851633                   | YDR061W;<br>YDR061W |                                                                                                                               | mitochondrion                            | catalytic activity;nucleotide binding                                       | 0.266                    | 0.125                             | 0.47                                           |
| P21771    | 37S ribosomal protein S28, mitochondrial [OS=Saccharomyces cerevisiae S288c]                     | 851937                   | MRP528;<br>YDR337W  | cell organization and biogenesis;metabolic process                                                                            | mitochondrion;ribosome                   | RNA binding;structural molecule activity                                    | 0.274                    | 0.129                             | 0.47                                           |
| P38797    | Protein phosphatase 2C homolog 7, mitochondrial [OS=Saccharomyces cerevisiae S288c]              | 856475                   | PTC7;<br>YHR076W    | metabolic process                                                                                                             | mitochondrion                            | catalytic activity;metal ion binding;protein binding                        | 0.233                    | 0.11                              | 0.47                                           |
| P36517    | 54S ribosomal protein L4, mitochondrial [OS=Saccharomyces cerevisiae S288c]                      | 851160                   | MRPL4;<br>YLR439W   | cell organization and biogenesis;metabolic process                                                                            | mitochondrion;ribosome                   | structural molecule activity                                                | 0.233                    | 0.11                              | 0.47                                           |
| P51998    | 54S ribosomal protein yml6, mitochondrial [OS=Saccharomyces cerevisiae S288c]                    | 854983                   | YML6;<br>YML025C    | cell organization and biogenesis;metabolic process                                                                            | mitochondrion;ribosome                   | RNA binding;structural molecule activity                                    | 0.245                    | 0.116                             | 0.47                                           |
| P53140    | Protein RMD9, mitochondrial [OS=Saccharomyces cerevisiae S288c]                                  | 852771                   | RMD9;<br>YGL107C    | cell differentiation;metabolic process;regulation of biological process                                                       | membrane;mitochondrion                   | RNA binding                                                                 | 0.227                    | 0.108                             | 0.48                                           |
| P07236    | Threonine--tRNA ligase, mitochondrial [OS=Saccharomyces cerevisiae S288c]                        | 853640                   | MST1;<br>YKL194C    | metabolic process                                                                                                             | cytoplasm;mitochondrion;organelle lumen  | catalytic activity;nucleotide binding;RNA binding                           | 0.15                     | 0.072                             | 0.48                                           |
| P32332    | Mitochondrial oxaloacetate transport protein [OS=Saccharomyces cerevisiae S288c]                 | 853739                   | OAC1;<br>YKL120W    | metabolic process;transport                                                                                                   | membrane;mitochondrion                   | structural molecule activity;transporter activity                           | 3.642                    | 1.783                             | 0.49                                           |
| P07275    | Delta-1-pyrroline-5-carboxylate dehydrogenase, mitochondrial [OS=Saccharomyces cerevisiae S288c] | 856432                   | PUT2;<br>YHR037W    | metabolic process                                                                                                             | membrane;mitochondrion;organelle lumen   | catalytic activity                                                          | 1.848                    | 1.009                             | 0.55                                           |
| P00950    | Phosphoglycerate mutase 1 [OS=Saccharomyces cerevisiae S288c]                                    | 853705                   | GPM1;<br>YKL152C    | metabolic process;regulation of biological process                                                                            | cytoplasm;cytosol;membrane;mitochondrion | catalytic activity                                                          | 1.512                    | 0.848                             | 0.56                                           |
| P32860    | NifU-like protein, mitochondrial [OS=Saccharomyces cerevisiae S288c]                             | 853826                   | NFU1;<br>YKL040C    | cell organization and biogenesis;cellular homeostasis;metabolic process                                                       | mitochondrion;organelle lumen            | metal ion binding                                                           | 1.371                    | 0.778                             | 0.57                                           |
| P43635    | Citrate synthase 3, mitochondrial [OS=Saccharomyces cerevisiae S288c]                            | 856107                   | CIT3;<br>YPR001W    | metabolic process                                                                                                             | mitochondrion                            | catalytic activity                                                          | 1.346                    | 0.817                             | 0.61                                           |
| P40086    | Cytochrome c oxidase assembly protein cox15 [OS=Saccharomyces                                    | 856884                   | COX15;<br>YER141    | cell organization and biogenesis;metabolic                                                                                    | membrane;mitochondrion                   | catalytic activity;transporter                                              | 1.346                    | 0.817                             | 0.61                                           |

|        |                                                                                                               |        |                    |                                                                                                          |                                                                |                                                                   |       |       |      |
|--------|---------------------------------------------------------------------------------------------------------------|--------|--------------------|----------------------------------------------------------------------------------------------------------|----------------------------------------------------------------|-------------------------------------------------------------------|-------|-------|------|
|        | cerevisiae S288c]                                                                                             |        | W                  | process;transport                                                                                        |                                                                | activity                                                          |       |       |      |
| P36525 | 54S ribosomal protein L24, mitochondrial [OS=Saccharomyces cerevisiae S288c]                                  | 855231 | MRPL24;<br>YMR193W | cell organization and biogenesis;metabolic process                                                       | mitochondrion;ribosome                                         | RNA binding;structural molecule activity                          | 0.585 | 0.359 | 0.61 |
| P39525 | 3-oxoacyl-[acyl-carrier-protein] synthase homolog [OS=Saccharomyces cerevisiae S288c]                         | 856790 | CEM1;<br>YER061C   | metabolic process                                                                                        | mitochondrion                                                  | catalytic activity                                                | 0.369 | 0.233 | 0.63 |
| P32898 | Mitochondrial presequence protease [OS=Saccharomyces cerevisiae S288c]                                        | 852041 | CYM1;<br>YDR430C   | metabolic process                                                                                        | mitochondrion                                                  | catalytic activity;metal ion binding                              | 0.25  | 0.16  | 0.64 |
| P07806 | Valine--tRNA ligase, mitochondrial [OS=Saccharomyces cerevisiae S288c]                                        | 852986 | VAS1;<br>YGR094W   | metabolic process;regulation of biological process                                                       | cytoplasm;cytosol;mitochondrion                                | catalytic activity;nucleotide binding                             | 0.212 | 0.136 | 0.64 |
| Q05931 | Heat shock protein SSQ1, mitochondrial [OS=Saccharomyces cerevisiae S288c]                                    | 851084 | SSQ1;<br>YLR369W   | cell organization and biogenesis;metabolic process                                                       | mitochondrion;organelle lumen                                  | nucleotide binding;protein binding                                | 0.189 | 0.122 | 0.65 |
| P38071 | Enoyl-[acyl-carrier protein] reductase [NADPH, B-specific], mitochondrial [OS=Saccharomyces cerevisiae S288c] | 852314 | ETR1;<br>YBR026C   | metabolic process                                                                                        | mitochondrion;organelle lumen                                  | catalytic activity;DNA binding;metal ion binding                  | 3.329 | 2.162 | 0.65 |
| P15424 | ATP-dependent RNA helicase MSS116, mitochondrial [OS=Saccharomyces cerevisiae S288c]                          | 851775 | MSS116;<br>YDR194C | metabolic process;regulation of biological process                                                       | mitochondrion;organelle lumen                                  | catalytic activity;nucleotide binding;RNA binding                 | 0.166 | 0.108 | 0.65 |
| P25374 | Cysteine desulfurase, mitochondrial [OS=Saccharomyces cerevisiae S288c]                                       | 850343 | NFS1;<br>YCL017C   | cell organization and biogenesis;cellular homeostasis;metabolic process                                  | mitochondrion;nucleus                                          | catalytic activity;metal ion binding;protein binding              | 0.817 | 0.532 | 0.65 |
| P38825 | Protein TOM71 [OS=Saccharomyces cerevisiae S288c]                                                             | 856517 | TOM71;<br>YHR117W  | transport                                                                                                | membrane;mitochondrion                                         | protein binding;transporter activity                              | 0.512 | 0.343 | 0.67 |
| P33310 | ATP-dependent permease MDL1, mitochondrial [OS=Saccharomyces cerevisiae S288c]                                | 850885 | MDL1;<br>YLR188W   | transport                                                                                                | membrane;mitochondrion                                         | catalytic activity;nucleotide binding;transporter activity        | 0.528 | 0.354 | 0.67 |
| P38325 | Mitochondrial outer membrane protein OM14 [OS=Saccharomyces cerevisiae S288c]                                 | 852531 | OM14;<br>YBR230C   | transport                                                                                                | membrane;mitochondrion                                         |                                                                   | 6.197 | 4.179 | 0.67 |
| P32904 | 54S ribosomal protein L6, mitochondrial [OS=Saccharomyces cerevisiae S288c]                                   | 856552 | MRPL6;<br>YHR147C  | cell organization and biogenesis;metabolic process                                                       | mitochondrion;ribosome                                         | RNA binding;structural molecule activity                          | 0.778 | 0.54  | 0.69 |
| P33416 | Heat shock protein 78, mitochondrial [OS=Saccharomyces cerevisiae S288c]                                      | 851845 | HSP78;<br>YDR258C  | cell organization and biogenesis;metabolic process;regulation of biological process;response to stimulus | mitochondrion;organelle lumen                                  | catalytic activity;nucleotide binding;protein binding             | 1.383 | 0.973 | 0.70 |
| P16603 | NADPH--cytochrome P450 reductase [OS=Saccharomyces cerevisiae S288c]                                          | 856438 | NCP1;<br>YHR042W   | metabolic process                                                                                        | cytoplasm;cytosol;endoplasmic reticulum;membrane;mitochondrion | catalytic activity;metal ion binding;nucleotide binding           | 0.604 | 0.425 | 0.70 |
| P49367 | Homoaconitase, mitochondrial [OS=Saccharomyces cerevisiae S288c]                                              | 851820 | LYS4;<br>YDR234W   | metabolic process                                                                                        | mitochondrion                                                  | catalytic activity;metal ion binding;protein binding              | 0.551 | 0.389 | 0.71 |
| P43567 | alanine--glyoxylate aminotransferase 1 [OS=Saccharomyces cerevisiae S288c]                                    | 850514 | AGX1;<br>YFL030W   | metabolic process                                                                                        | cytosol;mitochondrion                                          | catalytic activity                                                | 0.468 | 0.334 | 0.71 |
| P10507 | mitochondrial-processing peptidase subunit beta [OS=Saccharomyces cerevisiae S288c]                           | 850860 | MAS1;<br>YLR163C   | metabolic process;transport                                                                              | mitochondrion;organelle lumen                                  | catalytic activity;metal ion binding;protein binding              | 0.468 | 0.334 | 0.71 |
| Q08970 | Mitochondrial metal transporter 2 [OS=Saccharomyces cerevisiae S288c]                                         | 855877 | MMT2;<br>YPL224C   | cellular homeostasis;regulation of biological process;response to stimulus;transport                     | membrane;mitochondrion                                         | transporter activity                                              | 0.407 | 0.292 | 0.72 |
| P00447 | Superoxide dismutase [Mn], mitochondrial [OS=Saccharomyces cerevisiae S288c]                                  | 856399 | SOD2;<br>YHR008C   | metabolic process;response to stimulus                                                                   | mitochondrion;organelle lumen                                  | antioxidant activity;catalytic activity;metal ion binding         | 1.424 | 1.031 | 0.72 |
| P09440 | C-1-tetrahydrofolate synthase, mitochondrial [OS=Saccharomyces cerevisiae S288c]                              | 852378 | MIS1;<br>YBR084W   | metabolic process                                                                                        | cytosol;mitochondrion                                          | catalytic activity;nucleotide binding                             | 0.633 | 0.459 | 0.73 |
| P32799 | Cytochrome c oxidase subunit 6A, mitochondrial [OS=Saccharomyces cerevisiae S288c]                            | 852684 | COX13;<br>YGL191W  | cell organization and biogenesis;metabolic process;regulation of biological process;transport            | membrane;mitochondrion                                         | catalytic activity;enzyme regulator activity;transporter activity | 2.981 | 2.162 | 0.73 |
| Q04458 | Fatty aldehyde dehydrogenase HFD1 [OS=Saccharomyces cerevisiae S288c]                                         | 855137 | HFD1;<br>YMR110C   | metabolic process                                                                                        | endoplasmic reticulum;endosome;membrane;mitochondrion          | catalytic activity                                                | 1.346 | 0.978 | 0.73 |
| P53312 | Succinyl-CoA ligase [ADP-forming] subunit beta, mitochondrial [OS=Saccharomyces cerevisiae S288c]             | 853159 | LSC2;<br>YGR244C   | metabolic process                                                                                        | mitochondrion                                                  | catalytic activity;nucleotide binding                             | 3.417 | 2.535 | 0.74 |
| P40185 | Protein mmf1, mitochondrial [OS=Saccharomyces cerevisiae S288c]                                               | 854760 | MMF1;<br>YIL051C   | cell organization and biogenesis;metabolic process                                                       | mitochondrion;organelle lumen                                  |                                                                   | 4.012 | 2.981 | 0.74 |
| P00410 | Cytochrome c oxidase subunit 2 [OS=Saccharomyces cerevisiae S288c]                                            | 854622 | COX2;<br>Q0250     | metabolic process;transport                                                                              | membrane;mitochondrion                                         | catalytic activity;metal ion binding;protein                      | 2.162 | 1.61  | 0.74 |

|        |                                                                                                          |        |                |                                                                                                          |                                                          |                                                                                        |        |        |      |
|--------|----------------------------------------------------------------------------------------------------------|--------|----------------|----------------------------------------------------------------------------------------------------------|----------------------------------------------------------|----------------------------------------------------------------------------------------|--------|--------|------|
|        |                                                                                                          |        |                |                                                                                                          |                                                          | binding;transporter activity                                                           |        |        |      |
| P40053 | Altered inheritance of mitochondria protein 9, mitochondrial [OS=Saccharomyces cerevisiae S288c]         | 856813 | AIM9; YER080W  |                                                                                                          | mitochondrion                                            |                                                                                        | 1.19   | 0.891  | 0.75 |
| Q03798 | Altered inheritance of mitochondria protein 36, mitochondrial [OS=Saccharomyces cerevisiae S288c]        | 855189 | AIM36; YMR157C |                                                                                                          | membrane;mitochondrion                                   |                                                                                        | 0.833  | 0.624  | 0.75 |
| P10662 | 37S ribosomal protein MRP1, mitochondrial [OS=Saccharomyces cerevisiae S288c]                            | 851948 | MRP1; YDR347W  | cell organization and biogenesis;metabolic process;response to stimulus                                  | mitochondrion;ribosome                                   | antioxidant activity;catalytic activity;metal ion binding;structural molecule activity | 0.778  | 0.585  | 0.75 |
| Q06143 | mitochondrial dicarboxylate transporter [OS=Saccharomyces cerevisiae S288c]                              | 851063 | DIC1; YLR348C  | metabolic process;transport                                                                              | membrane;mitochondrion                                   | structural molecule activity;transporter activity                                      | 0.73   | 0.551  | 0.75 |
| P00890 | citrate synthase, mitochondrial [OS=Saccharomyces cerevisiae S288c]                                      | 855732 | CIT1; YNR001C  | metabolic process;transport                                                                              | cytosol;mitochondrion;organelle lumen                    | catalytic activity                                                                     | 10.788 | 8.211  | 0.76 |
| P19882 | heat shock protein 60, mitochondrial [OS=Saccharomyces cerevisiae S288c]                                 | 850963 | HSP60; YLR259C | cell organization and biogenesis;metabolic process;regulation of biological process;transport            | cytoplasm;cytosol;membrane;mitochondrion;organelle lumen | catalytic activity;DNA binding;nucleotide binding;protein binding                      | 11.743 | 9      | 0.77 |
| P27697 | Atypical kinase COQ8, mitochondrial [OS=Saccharomyces cerevisiae S288c]                                  | 852758 | COQ8; YGL119W  | metabolic process                                                                                        | membrane;mitochondrion;organelle lumen                   | catalytic activity;nucleotide binding                                                  | 0.365  | 0.283  | 0.78 |
| Q01163 | 37S ribosomal protein S23, mitochondrial [OS=Saccharomyces cerevisiae S288c]                             | 852748 | RSM23; YGL129C | cell organization and biogenesis;metabolic process                                                       | mitochondrion;ribosome                                   | catalytic activity;nucleotide binding;RNA binding;structural molecule activity         | 0.365  | 0.283  | 0.78 |
| P07253 | cytochrome B pre-mRNA-processing protein 6 [OS=Saccharomyces cerevisiae S288c]                           | 852417 | CBP6; YBR120C  | cell organization and biogenesis;metabolic process;regulation of biological process                      | mitochondrion;ribosome                                   |                                                                                        | 2.162  | 1.683  | 0.78 |
| Q12480 | Probable electron transfer flavoprotein subunit alpha, mitochondrial [OS=Saccharomyces cerevisiae S288c] | 856112 | AIM45; YPR004C | metabolic process;transport                                                                              | mitochondrion;organelle lumen                            | catalytic activity;nucleotide binding                                                  | 0.995  | 0.778  | 0.78 |
| P53292 | 37S ribosomal protein S35, mitochondrial [OS=Saccharomyces cerevisiae S288c]                             | 853075 | MRP53; YGR165W | cell organization and biogenesis;metabolic process                                                       | mitochondrion;ribosome                                   | structural molecule activity                                                           | 0.738  | 0.585  | 0.79 |
| POCS90 | Heat shock protein SSC1, mitochondrial [OS=Saccharomyces cerevisiae S288c]                               | 853503 | SSC1; YJR045C  | cell organization and biogenesis;metabolic process;regulation of biological process;transport            | membrane;mitochondrion;nucleus;organelle lumen           | catalytic activity;enzyme regulator activity;nucleotide binding;protein binding        | 17.957 | 14.647 | 0.82 |
| P40035 | Mitochondrial phosphate carrier protein 2 [OS=Saccharomyces cerevisiae S288c]                            | 856779 | PIC2; YER053C  | cellular homeostasis;metabolic process;transport                                                         | membrane;mitochondrion                                   | structural molecule activity;transporter activity                                      | 1.637  | 1.336  | 0.82 |
| P22136 | ATPase expression protein 2, mitochondrial [OS=Saccharomyces cerevisiae S288c]                           | 855325 | AEP2; YMR282C  | metabolic process;regulation of biological process                                                       | mitochondrion                                            | RNA binding                                                                            | 0.431  | 0.359  | 0.83 |
| P32473 | Pyruvate dehydrogenase E1 component subunit beta, mitochondrial [OS=Saccharomyces cerevisiae S288c]      | 852522 | PDB1; YBR221C  | metabolic process                                                                                        | mitochondrion;organelle lumen                            | catalytic activity                                                                     | 3.833  | 3.281  | 0.86 |
| P33311 | ATP-dependent permease MDL2, mitochondrial [OS=Saccharomyces cerevisiae S288c]                           | 855858 | MDL2; YPL270W  | response to stimulus;transport                                                                           | membrane;mitochondrion                                   | catalytic activity;nucleotide binding;transporter activity                             | 0.708  | 0.619  | 0.87 |
| P48015 | Aminomethyltransferase, mitochondrial [OS=Saccharomyces cerevisiae S288c]                                | 851582 | GCV1; YDR019C  | metabolic process                                                                                        | mitochondrion                                            | catalytic activity;protein binding                                                     | 3.489  | 3.062  | 0.88 |
| Q12031 | Mitochondrial 2-methylisocitrate lyase [OS=Saccharomyces cerevisiae S288c]                               | 856114 | ICL2; YPR006C  | metabolic process                                                                                        | mitochondrion;organelle lumen                            | catalytic activity                                                                     | 0.947  | 0.833  | 0.88 |
| P36775 | Lon protease homolog, mitochondrial [OS=Saccharomyces cerevisiae S288c]                                  | 852259 | PIM1; YBL022C  | cell organization and biogenesis;metabolic process;regulation of biological process;response to stimulus | cytoplasm;mitochondrion;organelle lumen                  | catalytic activity;DNA binding;nucleotide binding;RNA binding                          | 0.359  | 0.318  | 0.89 |
| P35191 | DnaJ homolog 1, mitochondrial [OS=Saccharomyces cerevisiae S288c]                                        | 850530 | MDJ1; YFL016C  | cell organization and biogenesis;metabolic process;regulation of biological process;response to stimulus | mitochondrion;organelle lumen                            | enzyme regulator activity;metal ion binding;nucleotide binding;protein binding         | 1.477  | 1.31   | 0.89 |
| P54783 | D-arabinono-1,4-lactone oxidase [OS=Saccharomyces cerevisiae S288c]                                      | 854888 | ALO1; YML086C  | metabolic process;response to stimulus                                                                   | membrane;mitochondrion                                   | catalytic activity;nucleotide binding                                                  | 2.162  | 1.929  | 0.89 |
| P17505 | Malate dehydrogenase, mitochondrial [OS=Saccharomyces cerevisiae S288c]                                  | 853777 | MDH1; YKL085W  | metabolic process                                                                                        | mitochondrion;organelle lumen                            | catalytic activity;protein binding;RNA binding                                         | 32.405 | 28.936 | 0.89 |
| P37292 | Serine hydroxymethyltransferase, mitochondrial [OS=Saccharomyces cerevisiae S288c]                       | 852565 | SHM1; YBR263W  | metabolic process                                                                                        | mitochondrion                                            | catalytic activity                                                                     | 3.037  | 2.765  | 0.91 |

|        |                                                                                                           |        |                  |                                                                                                  |                                                  |                                                                                     |        |        |      |
|--------|-----------------------------------------------------------------------------------------------------------|--------|------------------|--------------------------------------------------------------------------------------------------|--------------------------------------------------|-------------------------------------------------------------------------------------|--------|--------|------|
| P16387 | Pyruvate dehydrogenase E1 component subunit alpha, mitochondrial [OS=Saccharomyces cerevisiae S288c]      | 856925 | PDA1; YER178W    | cell growth;metabolic process                                                                    | mitochondrion;organelle lumen                    | catalytic activity                                                                  | 5.898  | 5.404  | 0.92 |
| Q12428 | Probable 2-methylcitrate dehydratase [OS=Saccharomyces cerevisiae S288c]                                  | 856108 | PDH1; YPR002W    | metabolic process                                                                                | cytoplasm;membrane;mitochondrion                 | catalytic activity                                                                  | 5.978  | 5.494  | 0.92 |
| P07342 | Acetolactate synthase catalytic subunit, mitochondrial [OS=Saccharomyces cerevisiae S288c]                | 855135 | ILV2; YMR108W    | metabolic process                                                                                | mitochondrion                                    | catalytic activity;metal ion binding;nucleotide binding                             | 2.665  | 2.455  | 0.92 |
| P07251 | ATP synthase subunit alpha, mitochondrial [OS=Saccharomyces cerevisiae S288c]                             | 852177 | ATP1; YBL099W    | metabolic process;transport                                                                      | cytosol;membrane;mitochondrion                   | catalytic activity;nucleotide binding;transporter activity                          | 13.678 | 13.678 | 1.00 |
| Q08179 | Mitochondrial distribution and morphology protein 38 [OS=Saccharomyces cerevisiae S288c]                  | 854130 | MDM38; YOL027C   | cell organization and biogenesis;cellular homeostasis;regulation of biological process;transport | membrane;mitochondrion                           |                                                                                     | 3.467  | 3.467  | 1.00 |
| P02992 | elongation factor Tu, mitochondrial [OS=Saccharomyces cerevisiae S288c]                                   | 854359 | TUF1; YOR187W    | cell organization and biogenesis;metabolic process                                               | mitochondrion                                    | catalytic activity;nucleotide binding;RNA binding                                   | 3.924  | 3.924  | 1.00 |
| P25349 | Flavoprotein-like protein YCP4 [OS=Saccharomyces cerevisiae S288c]                                        | 850360 | YCP4; YCR004C    | metabolic process;regulation of biological process                                               | cytoplasm;membrane;mitochondrion                 | catalytic activity;nucleotide binding;protein binding                               | 5.813  | 5.813  | 1.00 |
| P00359 | Glyceraldehyde-3-phosphate dehydrogenase 3 [OS=Saccharomyces cerevisiae S288c]                            | 853106 | TDH3; YGR192C    | cell death;metabolic process                                                                     | cytoplasm;cytosol;membrane;mitochondrion;nucleus | catalytic activity;nucleotide binding;RNA binding                                   | 2.675  | 2.675  | 1.00 |
| Q03028 | Mitochondrial 2-oxodicarboxylate carrier 1 [OS=Saccharomyces cerevisiae S288c]                            | 855969 | ODC1; YPL134C    | metabolic process;transport                                                                      | membrane;mitochondrion                           | structural molecule activity;transporter activity                                   | 4.275  | 4.275  | 1.00 |
| P32795 | Mitochondrial inner membrane i-AAA protease supercomplex subunit YME1 [OS=Saccharomyces cerevisiae S288c] | 856135 | YME1; YPR024W    | metabolic process;response to stimulus;transport                                                 | membrane;mitochondrion                           | catalytic activity;metal ion binding;nucleotide binding;protein binding             | 0.8    | 0.8    | 1.00 |
| P28834 | Isocitrate dehydrogenase [NAD] subunit 1, mitochondrial [OS=Saccharomyces cerevisiae S288c]               | 855691 | IDH1; YNL037C    | metabolic process;transport                                                                      | cytosol;mitochondrion;organelle lumen            | catalytic activity;metal ion binding;nucleotide binding;protein binding;RNA binding | 2.36   | 2.36   | 1.00 |
| P04037 | cytochrome c oxidase subunit 4, mitochondrial [OS=Saccharomyces cerevisiae S288c]                         | 852688 | COX4; YGL187C    | cell organization and biogenesis;metabolic process;transport                                     | membrane;mitochondrion                           | catalytic activity;metal ion binding;transporter activity                           | 5.579  | 5.579  | 1.00 |
| Q08968 | UPF0061 protein FMP40 [OS=Saccharomyces cerevisiae S288c]                                                 | 855879 | FMP40; YPL222W   |                                                                                                  | mitochondrion                                    | protein binding                                                                     | 0.65   | 0.65   | 1.00 |
| P53721 | Respiratory supercomplex factor 2, mitochondrial [OS=Saccharomyces cerevisiae S288c]                      | 855752 | RCF2; YNR018W    | cell organization and biogenesis                                                                 | membrane;mitochondrion                           |                                                                                     | 5.579  | 5.579  | 1.00 |
| P08466 | mitochondrial nuclease [OS=Saccharomyces cerevisiae S288c]                                                | 853222 | NUC1; YJL208C    | cell death;metabolic process                                                                     | membrane;mitochondrion                           | catalytic activity;metal ion binding                                                | 1.336  | 1.336  | 1.00 |
| P40508 | Uncharacterized protein YIL077C [OS=Saccharomyces cerevisiae S288c]                                       | 854733 | YIL077C; YIL077C |                                                                                                  | mitochondrion                                    |                                                                                     | 1.154  | 1.154  | 1.00 |
| P00360 | glyceraldehyde-3-phosphate dehydrogenase 1 [OS=Saccharomyces cerevisiae S288c]                            | 853395 | TDH1; YJL052W    | metabolic process                                                                                | cytoplasm;cytosol;membrane;mitochondrion         | catalytic activity;nucleotide binding                                               | 0.823  | 0.823  | 1.00 |
| P16451 | Pyruvate dehydrogenase complex protein X component, mitochondrial [OS=Saccharomyces cerevisiae S288c]     | 853107 | PDX1; YGR193C    | metabolic process                                                                                | mitochondrion;organelle lumen                    | catalytic activity;structural molecule activity                                     | 0.978  | 0.978  | 1.00 |
| P39726 | Glycine cleavage system H protein, mitochondrial [OS=Saccharomyces cerevisiae S288c]                      | 851254 | GCV3; YAL044C    | metabolic process                                                                                | mitochondrion                                    | catalytic activity                                                                  | 1.154  | 1.154  | 1.00 |
| Q06668 | Methyltransferase OMS1, mitochondrial [OS=Saccharomyces cerevisiae S288c]                                 | 851911 | OMS1; YDR316W    | metabolic process                                                                                | membrane;mitochondrion                           | catalytic activity                                                                  | 0.484  | 0.484  | 1.00 |
| P25573 | Mitochondrial inner membrane i-AAA protease supercomplex subunit MGR1 [OS=Saccharomyces cerevisiae S288c] | 850313 | MGR1; YCL044C    | metabolic process                                                                                | membrane;mitochondrion                           | protein binding                                                                     | 0.701  | 0.701  | 1.00 |
| P40416 | Iron-sulfur clusters transporter ATM1, mitochondrial [OS=Saccharomyces cerevisiae S288c]                  | 855347 | ATM1; YMR301C    | cellular homeostasis;metabolic process;transport                                                 | membrane;mitochondrion                           | catalytic activity;nucleotide binding;transporter activity                          | 0.546  | 0.546  | 1.00 |
| P42940 | Probable electron transfer flavoprotein subunit beta [OS=Saccharomyces cerevisiae S288c]                  | 853121 | CIR1; YGR207C    | metabolic process;transport                                                                      | mitochondrion;organelle lumen                    |                                                                                     | 2.162  | 2.162  | 1.00 |
| P25605 | Acetolactate synthase small subunit, mitochondrial [OS=Saccharomyces cerevisiae S288c]                    | 850348 | ILV6; YCL009C    | metabolic process;regulation of biological process                                               | mitochondrion                                    | catalytic activity;enzyme regulator activity                                        | 0.624  | 0.624  | 1.00 |
| P38127 | mitochondrial carrier protein RIM2 [OS=Saccharomyces cerevisiae S288c]                                    | 852491 | RIM2; YBR192W    | cell organization and biogenesis;metabolic process;transport                                     | membrane;mitochondrion                           | structural molecule activity;transporter activity                                   | 0.995  | 0.995  | 1.00 |

|        |                                                                                                           |         |                         |                                                                                                                    |                                                      |                                                                   |       |       |      |
|--------|-----------------------------------------------------------------------------------------------------------|---------|-------------------------|--------------------------------------------------------------------------------------------------------------------|------------------------------------------------------|-------------------------------------------------------------------|-------|-------|------|
| P38626 | NADH-cytochrome b5 reductase 1 [OS=Saccharomyces cerevisiae S288c]                                        | 854768  | CBR1; YL043C            | metabolic process                                                                                                  | endoplasmic reticulum;membrane;mitochondrion;nucleus | catalytic activity                                                | 0.778 | 0.778 | 1.00 |
| P38072 | Protein SCO2, mitochondrial [OS=Saccharomyces cerevisiae S288c]                                           | 852312  | SCO2; YBR024W           | cell organization and biogenesis;cellular homeostasis;metabolic process;transport                                  | membrane;mitochondrion                               | antioxidant activity;catalytic activity;metal ion binding         | 0.73  | 0.73  | 1.00 |
| P40008 | Protein FMP52, mitochondrial [OS=Saccharomyces cerevisiae S288c]                                          | 856721  | FMP52; YER004W          |                                                                                                                    | endoplasmic reticulum;membrane;mitochondrion         | catalytic activity                                                | 1.054 | 1.054 | 1.00 |
| P32331 | Carrier protein YMC1, mitochondrial [OS=Saccharomyces cerevisiae S288c]                                   | 856171  | YMC1; YPR058W           | metabolic process;transport                                                                                        | membrane;mitochondrion;vacuole                       | structural molecule activity;transporter activity                 | 0.968 | 0.968 | 1.00 |
| Q04472 | Mitochondrial inner membrane i-AAA protease supercomplex subunit MGR3 [OS=Saccharomyces cerevisiae S288c] | 855142  | MGR3; YMR115W           | metabolic process                                                                                                  | membrane;mitochondrion                               | protein binding                                                   | 0.322 | 0.322 | 1.00 |
| P38079 | protein YRO2 [OS=Saccharomyces cerevisiae S288c]                                                          | 852343  | YRO2; YBR054W           | transport                                                                                                          | endoplasmic reticulum;membrane;mitochondrion         | transporter activity                                              | 1.424 | 1.424 | 1.00 |
| P32787 | Mitochondrial genome maintenance protein MGM101 [OS=Saccharomyces cerevisiae S288c]                       | 853609  | MGM101; YJR144W         | cell organization and biogenesis;metabolic process;response to stimulus                                            | chromosome;mitochondrion                             | DNA binding                                                       | 0.833 | 0.833 | 1.00 |
| Q04935 | Cytochrome c oxidase protein 20, mitochondrial [OS=Saccharomyces cerevisiae S288c]                        | 851817  | COX20; YDR231C          | cell organization and biogenesis;metabolic process                                                                 | membrane;mitochondrion                               | protein binding                                                   | 1.424 | 1.424 | 1.00 |
| P50087 | MICOS subunit MIC26 [OS=Saccharomyces cerevisiae S288c]                                                   | 853150  | MOS2; MIC26; YGR235C    | cell organization and biogenesis                                                                                   | membrane;mitochondrion                               |                                                                   | 0.931 | 0.931 | 1.00 |
| P54115 | Magnesium-activated aldehyde dehydrogenase, cytosolic [OS=Saccharomyces cerevisiae S288c]                 | 856044  | ALD6; YPL061W           | metabolic process;response to stimulus                                                                             | cytoplasm;cytosol;mitochondrion                      | catalytic activity                                                | 0.346 | 0.346 | 1.00 |
| P28737 | Protein MSP1 [OS=Saccharomyces cerevisiae S288c]                                                          | 852915  | MSP1; YGR028W           | cell organization and biogenesis;metabolic process;regulation of biological process;response to stimulus;transport | membrane;mitochondrion;nucleus                       | catalytic activity;nucleotide binding;protein binding;RNA binding | 0.585 | 0.585 | 1.00 |
| Q05892 | MIOREX complex component 2 [OS=Saccharomyces cerevisiae S288c]                                            | 850997  | YLR290C; COQ11; YLR290C | metabolic process                                                                                                  | mitochondrion                                        | catalytic activity                                                | 1.054 | 1.054 | 1.00 |
| Q3E824 | Uncharacterized protein YOR020W-A [OS=Saccharomyces cerevisiae S288c]                                     | 1466480 | YOR020W-A; YOR020W-A    | metabolic process;transport                                                                                        | membrane;mitochondrion                               |                                                                   | 2.162 | 2.162 | 1.00 |
| P36151 | Uncharacterized protein YKR070W [OS=Saccharomyces cerevisiae S288c]                                       | 853944  | YKR070W; YKR070W        | metabolic process                                                                                                  | mitochondrion                                        |                                                                   | 0.274 | 0.274 | 1.00 |
| Q04438 | Stationary phase protein 4 [OS=Saccharomyces cerevisiae S288c]                                            | 855134  | SPG4; YMR107W           |                                                                                                                    |                                                      |                                                                   | 1.783 | 1.783 | 1.00 |
| Q03246 | 37S ribosomal protein S17, mitochondrial [OS=Saccharomyces cerevisiae S288c]                              | 855226  | MRPS17; YMR188C         | cell differentiation;cell organization and biogenesis;metabolic process                                            | mitochondrion;ribosome                               | RNA binding;structural molecule activity                          | 0.389 | 0.389 | 1.00 |
| P38910 | 10 kDa heat shock protein, mitochondrial [OS=Saccharomyces cerevisiae S288c]                              | 854185  | HSP10; YOR020C          | cell organization and biogenesis;metabolic process;response to stimulus;transport                                  | cytoplasm;mitochondrion;organelle lumen              | metal ion binding;nucleotide binding;protein binding              | 1.371 | 1.371 | 1.00 |
| P32792 | UPF0744 protein YSC83 [OS=Saccharomyces cerevisiae S288c]                                                 | 856410  | YSC83; YHR017W          |                                                                                                                    | membrane;mitochondrion                               |                                                                   | 0.369 | 0.369 | 1.00 |
| P25719 | Peptidyl-prolyl cis-trans isomerase C, mitochondrial [OS=Saccharomyces cerevisiae S288c]                  | 854897  | CPR3; YML078W           | cell death;metabolic process                                                                                       | mitochondrion;organelle lumen                        | catalytic activity                                                | 0.585 | 0.585 | 1.00 |
| P36163 | mitochondrial metalloendopeptidase OMA1 [OS=Saccharomyces cerevisiae S288c]                               | 853962  | OMA1; YKR087C           | metabolic process                                                                                                  | membrane;mitochondrion                               | catalytic activity;metal ion binding                              | 0.389 | 0.389 | 1.00 |
| P53230 | Phosphatidate cytidyltransferase, mitochondrial [OS=Saccharomyces cerevisiae S288c]                       | 852937  | TAM41; YGR046W          | metabolic process                                                                                                  | membrane;mitochondrion;organelle lumen               | catalytic activity                                                | 0.407 | 0.407 | 1.00 |
| P34231 | Uncharacterized protein YKL187C [OS=Saccharomyces cerevisiae S288c]                                       | 853648  | FAT3; YKL187C; YKL187C  | cell organization and biogenesis;transport                                                                         | membrane;mitochondrion                               |                                                                   | 0.425 | 0.425 | 1.00 |
| Q96VH5 | MICOS complex subunit Mic10 [OS=Saccharomyces cerevisiae S288c]                                           | 850300  | MOS1; MIC10; YCL057C-A  | cell organization and biogenesis                                                                                   | membrane;mitochondrion                               |                                                                   | 0.931 | 0.931 | 1.00 |
| Q12374 | Nuclear control of ATPase protein 2 [OS=Saccharomyces cerevisiae S288c]                                   | 856278  | NCA2; YPR155C           | metabolic process                                                                                                  | membrane;mitochondrion                               |                                                                   | 0.212 | 0.212 | 1.00 |
| P17695 | Glutaredoxin-2, mitochondrial [OS=Saccharomyces cerevisiae S288c]                                         | 852124  | GRX2; YDR513W           | cellular homeostasis;metabolic process;regulation of biological process;response to                                | cytoplasm;cytosol;mitochondrion                      | antioxidant activity;catalytic activity                           | 0.52  | 0.52  | 1.00 |



|        |                                                                                                            |             |                                           |                                                              |                                              |                                                       |       |       |      |
|--------|------------------------------------------------------------------------------------------------------------|-------------|-------------------------------------------|--------------------------------------------------------------|----------------------------------------------|-------------------------------------------------------|-------|-------|------|
|        |                                                                                                            |             |                                           | stimulus;transport                                           |                                              |                                                       |       |       |      |
| Q12375 | mitochondrial ornithine transporter 1 [OS=Saccharomyces cerevisiae S288c]                                  | 85429<br>7  | ORT1;<br>YOR13<br>OC                      | metabolic process;transport                                  | membrane;mitochondrion                       | structural molecule activity;transporter activity     | 0.54  | 0.54  | 1.00 |
| P28817 | 3-hydroxyisobutyryl-CoA hydrolase, mitochondrial [OS=Saccharomyces cerevisiae S288c]                       | 85160<br>6  | EHD3;<br>YDR03<br>6C                      | metabolic process                                            | mitochondrion                                | catalytic activity                                    | 0.269 | 0.269 | 1.00 |
| P50110 | Sorting assembly machinery 37 kDa subunit [OS=Saccharomyces cerevisiae S288c]                              | 85508<br>2  | SAM37<br>;<br>YMR06<br>OC                 | cell organization and biogenesis;transport                   | membrane;mitochondrion                       | protein binding                                       | 0.245 | 0.245 | 1.00 |
| P40496 | 37S ribosomal protein S25, mitochondrial [OS=Saccharomyces cerevisiae S288c]                               | 85471<br>5  | RSM25;<br>YIL093<br>C                     | cell organization and biogenesis;metabolic process           | mitochondrion;ribosome                       | structural molecule activity                          | 0.468 | 0.468 | 1.00 |
| P34222 | Peptidyl-tRNA hydrolase 2 [OS=Saccharomyces cerevisiae S288c]                                              | 85222<br>3  | PTH2;<br>YBL057<br>C                      | regulation of biological process                             | cytoplasm;cytosol;membrane;mitochondrion     | catalytic activity;protein binding                    | 0.425 | 0.425 | 1.00 |
| Q05648 | MIOREX complex component 10 [OS=Saccharomyces cerevisiae S288c]                                            | 85187<br>6  | YDR28<br>2C;<br>MRX10<br>;<br>YDR28<br>2C |                                                              | membrane;mitochondrion                       |                                                       | 0.222 | 0.222 | 1.00 |
| P38152 | Tricarboxylate transport protein [OS=Saccharomyces cerevisiae S288c]                                       | 85259<br>4  | CTP1;<br>YBR291<br>C                      | metabolic process;transport                                  | membrane;mitochondrion                       | structural molecule activity;transporter activity     | 0.245 | 0.245 | 1.00 |
| P25039 | Elongation factor G, mitochondrial [OS=Saccharomyces cerevisiae S288c]                                     | 85075<br>8  | MEF1;<br>YLR069<br>C                      | cell organization and biogenesis;metabolic process           | cytosol;mitochondrion                        | catalytic activity;nucleotide binding;RNA binding     | 0.099 | 0.099 | 1.00 |
| P34224 | Uncharacterized protein YBL059W [OS=Saccharomyces cerevisiae S288c]                                        | 85222<br>1  | YBL059<br>W;<br>YBL059<br>W               |                                                              | membrane;mitochondrion                       |                                                       | 0.468 | 0.468 | 1.00 |
| P12686 | 37S ribosomal protein MRP13, mitochondrial [OS=Saccharomyces cerevisiae S288c]                             | 85297<br>5  | MRP13<br>;<br>YGR08<br>4C                 | cell organization and biogenesis;metabolic process           | mitochondrion;ribosome                       | structural molecule activity                          | 0.259 | 0.259 | 1.00 |
| P36147 | Presequence translocated-associated motor subunit pam17, mitochondrial [OS=Saccharomyces cerevisiae S288c] | 85393<br>9  | PAM17<br>;<br>YKR065<br>C                 | transport                                                    | membrane;mitochondrion                       |                                                       | 0.778 | 0.778 | 1.00 |
| P53220 | Mitochondrial import inner membrane translocase subunit TIM21 [OS=Saccharomyces cerevisiae S288c]          | 85292<br>1  | TIM21;<br>YGR03<br>3C                     | cell organization and biogenesis;transport                   | membrane;mitochondrion                       | protein binding                                       | 0.501 | 0.501 | 1.00 |
| P38172 | MIOREX complex component 3 [OS=Saccharomyces cerevisiae S288c]                                             | 85218<br>1  | YBL095<br>W;<br>MRX3;<br>YBL095<br>W      |                                                              | membrane;mitochondrion                       |                                                       | 0.311 | 0.311 | 1.00 |
| P38702 | mitochondrial carrier protein LEU5 [OS=Saccharomyces cerevisiae S288c]                                     | 85639<br>1  | LEU5;<br>YHR00<br>2W                      | metabolic process;transport                                  | membrane;mitochondrion                       | structural molecule activity;transporter activity     | 0.212 | 0.212 | 1.00 |
| P11914 | Mitochondrial-processing peptidase subunit alpha [OS=Saccharomyces cerevisiae S288c]                       | 85641<br>9  | MAS2;<br>YHR02<br>4C                      | metabolic process;transport                                  | membrane;mitochondrion;organelle lumen       | catalytic activity;metal ion binding;protein binding  | 0.202 | 0.202 | 1.00 |
| P38088 | Glycine-tRNA ligase 1, mitochondrial [OS=Saccharomyces cerevisiae S288c]                                   |             | GRS1                                      | metabolic process                                            | cytoplasm;mitochondrion;organelle lumen      | catalytic activity;nucleotide binding;protein binding | 0.049 | 0.049 | 1.00 |
| Q06510 | Lysophosphatidylcholine acyltransferase [OS=Saccharomyces cerevisiae S288c]                                | 85626<br>2  | TAZ1;<br>YPR140<br>W                      | cell organization and biogenesis;metabolic process;transport | membrane;mitochondrion                       | catalytic activity                                    | 0.194 | 0.194 | 1.00 |
| P22353 | 54S ribosomal protein L8, mitochondrial [OS=Saccharomyces cerevisiae S288c]                                | 85338<br>2  | MRPL8;<br>YJL063<br>C                     | cell organization and biogenesis;metabolic process           | mitochondrion;ribosome                       | structural molecule activity                          | 0.166 | 0.166 | 1.00 |
| Q12251 | Uncharacterized mitochondrial carrier YPR011C [OS=Saccharomyces cerevisiae S288c]                          | 85612<br>1  | YPR011<br>C;<br>YPR011<br>C               | metabolic process;transport                                  | membrane;mitochondrion                       | structural molecule activity;transporter activity     | 0.389 | 0.389 | 1.00 |
| P00127 | Cytochrome b-c1 complex subunit 6 [OS=Saccharomyces cerevisiae S288c]                                      | 85059<br>3  | QCR6;<br>YFR033<br>C                      | metabolic process;transport                                  | membrane;mitochondrion                       | catalytic activity;transporter activity               | 0.334 | 0.334 | 1.00 |
| Q12233 | ATP synthase subunit g, mitochondrial [OS=Saccharomyces cerevisiae S288c]                                  | 85613<br>1  | ATP20;<br>YPR020<br>W                     | cell organization and biogenesis;metabolic process;transport | membrane;mitochondrion                       | catalytic activity;transporter activity               | 0.778 | 0.778 | 1.00 |
| Q02950 | 37S ribosomal protein MRP51, mitochondrial [OS=Saccharomyces cerevisiae S288c]                             | 85598<br>5  | MRP51<br>;<br>YPL118<br>W                 | cell organization and biogenesis;metabolic process           | mitochondrion;ribosome                       | structural molecule activity                          | 0.292 | 0.292 | 1.00 |
| Q2V2P9 | Uncharacterized protein YDR119W-A [OS=Saccharomyces cerevisiae S288c]                                      | 37999<br>70 | COX26;<br>YDR11<br>9W-A                   |                                                              | membrane;mitochondrion                       |                                                       | 1.154 | 1.154 | 1.00 |
| Q05867 | Uncharacterized protein YLR283W, mitochondrial [OS=Saccharomyces cerevisiae S288c]                         | 85098<br>8  | YLR283<br>W;<br>YLR283<br>W               |                                                              | endoplasmic reticulum;membrane;mitochondrion |                                                       | 0.11  | 0.11  | 1.00 |

|          |                                                                                                            |            |                            |                                                                                                                               |                                                 |                                                                           |            |            |      |
|----------|------------------------------------------------------------------------------------------------------------|------------|----------------------------|-------------------------------------------------------------------------------------------------------------------------------|-------------------------------------------------|---------------------------------------------------------------------------|------------|------------|------|
| P19516   | Cytochrome c oxidase assembly protein COX11, mitochondrial [OS=Saccharomyces cerevisiae S288c]             | 85597<br>1 | COX11;<br>YPL132<br>W      | cell organization and biogenesis;metabolic process                                                                            | membrane;mitochondrion;ribosome                 | metal ion binding                                                         | 0.274      | 0.274      | 1.00 |
| P38323   | ATP-dependent clpX-like chaperone, mitochondrial [OS=Saccharomyces cerevisiae S288c]                       | 85252<br>8 | MCK1;<br>YBR227<br>C       | metabolic process                                                                                                             | membrane;mitochondrion;organelle lumen          | catalytic activity;nucleotide binding                                     | 0.07       | 0.07       | 1.00 |
| P40530   | [Pyruvate dehydrogenase (acetyl-transferring)] kinase 1, mitochondrial [OS=Saccharomyces cerevisiae S288c] | 85476<br>9 | PKP1;<br>YIL042<br>C       | metabolic process                                                                                                             | mitochondrion;organelle lumen                   | catalytic activity;nucleotide binding;protein binding                     | 0.116      | 0.116      | 1.00 |
| P40581   | peroxiredoxin HYR1 [OS=Saccharomyces cerevisiae S288c]                                                     | 85485<br>5 | HYR1;<br>YIR037<br>W       | metabolic process;response to stimulus                                                                                        | cytoplasm;cytosol;mitochondrion;organelle lumen | antioxidant activity;catalytic activity                                   | 0.259      | 0.259      | 1.00 |
| P36528   | 54S ribosomal protein L17, mitochondrial [OS=Saccharomyces cerevisiae S288c]                               | 85546<br>9 | MRPL1<br>7;<br>YNL252<br>C | cell organization and biogenesis;metabolic process                                                                            | mitochondrion;ribosome                          | structural molecule activity                                              | 0.11       | 0.11       | 1.00 |
| P53732   | 37S ribosomal protein S12, mitochondrial [OS=Saccharomyces cerevisiae S288c]                               | 85577<br>2 | MRPS1<br>2;<br>YNR03<br>6C | cell organization and biogenesis;metabolic process                                                                            | mitochondrion;ribosome                          | structural molecule activity                                              | 0.292      | 0.292      | 1.00 |
| Q01532-1 | Cysteine proteinase 1, mitochondrial [OS=Saccharomyces cerevisiae S288c]                                   |            | MCY1                       | metabolic process;regulation of biological process;response to stimulus                                                       | cytoplasm;mitochondrion                         | catalytic activity;DNA binding;RNA binding                                | 0.086      | 0.086      | 1.00 |
| P41735   | 5-demethoxyubiquinone hydroxylase, mitochondrial [OS=Saccharomyces cerevisiae S288c]                       | 85429<br>2 | CAT5;<br>YOR12<br>5C       | metabolic process                                                                                                             | membrane;mitochondrion                          | catalytic activity;metal ion binding                                      | 0.155      | 0.155      | 1.00 |
| Q12328   | Mitochondrial import inner membrane translocase subunit TIM22 [OS=Saccharomyces cerevisiae S288c]          | 85130<br>9 | TIM22;<br>YDL217<br>C      | cell organization and biogenesis;transport                                                                                    | cytosol;membrane;mitochondrion                  | protein binding;transporter activity                                      | 0.233      | 0.233      | 1.00 |
| P40502   | Altered inheritance of mitochondria protein 19, mitochondrial [OS=Saccharomyces cerevisiae S288c]          | 85472<br>2 | AIM19;<br>YIL087<br>C      |                                                                                                                               | membrane;mitochondrion                          |                                                                           | 0.259      | 0.259      | 1.00 |
| P32463   | Acyl carrier protein, mitochondrial [OS=Saccharomyces cerevisiae S288c]                                    | 85364<br>2 | ACP1;<br>YKL192<br>C       | metabolic process;transport                                                                                                   | mitochondrion                                   |                                                                           | 0.259      | 0.259      | 1.00 |
| P38816   | thioredoxin reductase 2, mitochondrial [OS=Saccharomyces cerevisiae S288c]                                 | 85650<br>6 | TRR2;<br>YHR10<br>6W       | cellular homeostasis;metabolic process;regulation of biological process;response to stimulus                                  | cytoplasm;mitochondrion                         | antioxidant activity;catalytic activity                                   | 0.136      | 0.136      | 1.00 |
| P43557   | Protein fmp32, mitochondrial [OS=Saccharomyces cerevisiae S288c]                                           | 85049<br>8 | FMP32;<br>YFL046<br>W      | cell organization and biogenesis                                                                                              | membrane;mitochondrion                          |                                                                           | 0.179      | 0.179      | 1.00 |
| P38122   | 3-methyl-2-oxobutanoate hydroxymethyltransferase [OS=Saccharomyces cerevisiae S288c]                       | 85247<br>4 | ECM31;<br>YBR176<br>W      | metabolic process                                                                                                             | mitochondrion                                   | catalytic activity                                                        | 0.122      | 0.122      | 1.00 |
| P14832   | peptidyl-prolyl cis-trans isomerase [OS=Saccharomyces cerevisiae S288c]                                    | 85173<br>3 | CPR1;<br>YDR15<br>5C       | cell differentiation;cell organization and biogenesis;metabolic process;regulation of biological process;transport            | cytoplasm;mitochondrion;nucleus                 | catalytic activity;RNA binding                                            | 0.233      | 0.233      | 1.00 |
| P04039   | Cytochrome c oxidase polypeptide VIII, mitochondrial [OS=Saccharomyces cerevisiae S288c]                   | 85111<br>1 | COX8;<br>YLR395<br>C       | metabolic process;transport                                                                                                   | membrane;mitochondrion                          | catalytic activity;transporter activity                                   | 0.778      | 0.778      | 1.00 |
| Q02784   | Monothiol glutaredoxin-5, mitochondrial [OS=Saccharomyces cerevisiae S288c]                                | 85604<br>8 | GRX5;<br>YPL059<br>W       | cell organization and biogenesis;cellular homeostasis;metabolic process;regulation of biological process;response to stimulus | mitochondrion;organelle lumen                   | catalytic activity;metal ion binding                                      | 0.292      | 0.292      | 1.00 |
| Q06630   | Mitochondrial homologous recombination protein 1 [OS=Saccharomyces cerevisiae S288c]                       | 85189<br>0 | MHR1;<br>YDR29<br>6W       | cell organization and biogenesis;metabolic process;regulation of biological process;response to stimulus                      | mitochondrion;nucleus                           | catalytic activity;DNA binding;structural molecule activity               | 0.166      | 0.166      | 1.00 |
| P36520   | 54S ribosomal protein L10, mitochondrial [OS=Saccharomyces cerevisiae S288c]                               | 85543<br>6 | MRPL1<br>0;<br>YNL284<br>C | cell organization and biogenesis;metabolic process                                                                            | mitochondrion;ribosome                          | structural molecule activity                                              | 0.116      | 0.116      | 1.00 |
| Q03976   | 37S ribosomal protein S24, mitochondrial [OS=Saccharomyces cerevisiae S288c]                               | 85175<br>5 | RSM24;<br>YDR17<br>5C      | cell organization and biogenesis;metabolic process                                                                            | mitochondrion;ribosome                          | structural molecule activity                                              | 0.202      | 0.202      | 1.00 |
| P38909   | cytochrome c mitochondrial import factor CYC2 [OS=Saccharomyces cerevisiae S288c]                          | 85420<br>2 | CYC2;<br>YOR03<br>7W       | cell organization and biogenesis;metabolic process                                                                            | membrane;mitochondrion                          | catalytic activity                                                        | 0.194      | 0.194      | 1.00 |
| Q02863   | ubiquitin carboxyl-terminal hydrolase 16 [OS=Saccharomyces cerevisiae S288c]                               | 85603<br>2 | UBP16;<br>YPL072<br>W      | metabolic process                                                                                                             | membrane;mitochondrion                          | catalytic activity                                                        | 0.072      | 0.072      | 1.00 |
| P00431   | cytochrome c peroxidase, mitochondrial [OS=Saccharomyces cerevisiae S288c]                                 | 85394<br>0 | CCP1;<br>YKR066<br>C       | metabolic process;response to stimulus                                                                                        | mitochondrion;organelle lumen                   | antioxidant activity;catalytic activity;metal ion binding;protein binding | 0.093      | 0.093      | 1.00 |
| P10834   | protein PET54 [OS=Saccharomyces cerevisiae S288c]                                                          | 85313<br>7 | PET54;<br>YGR22<br>2W      | metabolic process;regulation of biological process                                                                            | membrane;mitochondrion;organelle lumen          | nucleotide binding;RNA binding;translation regulator activity             | 0.11       | 0.11       | 1.00 |
| P46367   | Potassium-activated aldehyde dehydrogenase, mitochondrial [OS=Saccharomyces cerevisiae S288c]              | 85455<br>6 | ALD4;<br>YOR37<br>4W       | metabolic process                                                                                                             | mitochondrion;organelle lumen                   | catalytic activity                                                        | 15.92<br>7 | 17.07<br>8 | 1.07 |
| P40215   | External NADH-ubiquinone oxidoreductase 1, mitochondrial                                                   | 85517<br>6 | NDE1;<br>YMR14             | metabolic process                                                                                                             | mitochondrion                                   | catalytic activity;nucleotide                                             | 4.043      | 4.367      | 1.08 |

|          |                                                                                                             |            |                             |                                                                                     |                                       |                                                                            |            |            |      |
|----------|-------------------------------------------------------------------------------------------------------------|------------|-----------------------------|-------------------------------------------------------------------------------------|---------------------------------------|----------------------------------------------------------------------------|------------|------------|------|
|          | [OS=Saccharomyces cerevisiae S288c]                                                                         |            | 5C                          |                                                                                     |                                       | binding                                                                    |            |            |      |
| P20967   | 2-oxoglutarate dehydrogenase, mitochondrial [OS=Saccharomyces cerevisiae S288c]                             | 85468<br>1 | KGD1;<br>YIL125<br>W        | metabolic process                                                                   | cytosol;mitochondrion;organelle lumen | catalytic activity                                                         | 5.201      | 5.764      | 1.11 |
| Q07500   | External NADH-ubiquinone oxidoreductase 2, mitochondrial [OS=Saccharomyces cerevisiae S288c]                | 85147<br>4 | NDE2;<br>YDL085<br>W        | metabolic process                                                                   | mitochondrion                         | catalytic activity;nucleotide binding                                      | 2.687      | 2.981      | 1.11 |
| P38077   | ATP synthase subunit gamma, mitochondrial [OS=Saccharomyces cerevisiae S288c]                               | 85232<br>7 | ATP3;<br>YBR039<br>W        | metabolic process;transport                                                         | membrane;mitochondrion                | catalytic activity;transporter activity                                    | 9          | 10.10<br>3 | 1.12 |
| P40012   | protoporphyrinogen oxidase [OS=Saccharomyces cerevisiae S288c]                                              | 85673<br>3 | HEM14<br>;<br>YER014<br>W   | metabolic process                                                                   | membrane;mitochondrion                | catalytic activity                                                         | 0.947      | 1.069      | 1.13 |
| P32843   | Mitochondrial escape protein 2 [OS=Saccharomyces cerevisiae S288c]                                          | 85534<br>8 | YME2;<br>YMR30<br>2C        | cell organization and biogenesis;metabolic process                                  | membrane;mitochondrion                | nucleotide binding;RNA binding                                             | 1.637      | 1.859      | 1.14 |
| P40495   | Homoisocitrate dehydrogenase, mitochondrial [OS=Saccharomyces cerevisiae S288c]                             | 85471<br>4 | LYS12;<br>YIL094<br>C       | metabolic process                                                                   | mitochondrion                         | catalytic activity;metal ion binding;nucleotide binding                    | 2.481      | 2.831      | 1.14 |
| P47127   | Altered inheritance of mitochondria protein 24, mitochondrial [OS=Saccharomyces cerevisiae S288c]           | 85354<br>3 | AIM24;<br>YJR080<br>C       | cell organization and biogenesis                                                    | mitochondrion                         |                                                                            | 1.395      | 1.593      | 1.14 |
| P40047   | Aldehyde dehydrogenase 5, mitochondrial [OS=Saccharomyces cerevisiae S288c]                                 | 85680<br>4 | ALD5;<br>YER073<br>W        | metabolic process                                                                   | mitochondrion;organelle lumen         | catalytic activity                                                         | 0.968      | 1.106      | 1.14 |
| P23641   | mitochondrial phosphate carrier protein [OS=Saccharomyces cerevisiae S288c]                                 | 85354<br>0 | MIR1;<br>YJR077<br>C        | metabolic process;transport                                                         | membrane;mitochondrion                | protein binding;structural molecule activity;transporter activity          | 10.36<br>5 | 11.91<br>5 | 1.15 |
| P53598   | Succinyl-CoA ligase [ADP-forming] subunit alpha, mitochondrial [OS=Saccharomyces cerevisiae S288c]          | 85431<br>0 | LSC1;<br>YOR14<br>2W        | metabolic process                                                                   | cytosol;mitochondrion                 | catalytic activity;nucleotide binding                                      | 5.158      | 5.952      | 1.15 |
| P38891   | Branched-chain-amino-acid aminotransferase, mitochondrial [OS=Saccharomyces cerevisiae S288c]               | 85661<br>5 | BAT1;<br>YHR20<br>8W        | metabolic process;regulation of biological process;response to stimulus             | mitochondrion;organelle lumen         | catalytic activity                                                         | 2.511      | 2.899      | 1.15 |
| P50085   | Prohibitin-2 [OS=Saccharomyces cerevisiae S288c]                                                            | 85314<br>6 | PHB2;<br>YGR23<br>1C        | cell organization and biogenesis;metabolic process;regulation of biological process | membrane;mitochondrion                | protein binding                                                            | 2.511      | 2.899      | 1.15 |
| P21801   | Succinate dehydrogenase [ubiquinone] iron-sulfur subunit, mitochondrial [OS=Saccharomyces cerevisiae S288c] | 85068<br>5 | SDH2;<br>YLL041<br>C        | metabolic process;transport                                                         | membrane;mitochondrion                | catalytic activity;metal ion binding                                       | 12.11<br>1 | 14.01<br>3 | 1.16 |
| P38988   | Mitochondrial GTP/GDP carrier protein 1 [OS=Saccharomyces cerevisiae S288c]                                 | 85132<br>9 | GGC1;<br>YDL198<br>C        | cell organization and biogenesis;cellular homeostasis;metabolic process;transport   | membrane;mitochondrion                | structural molecule activity;transporter activity                          | 2.728      | 3.16       | 1.16 |
| P33303   | Succinate/fumarate mitochondrial transporter [OS=Saccharomyces cerevisiae S288c]                            | 85355<br>8 | SFC1;<br>YJR095<br>W        | metabolic process;transport                                                         | membrane;mitochondrion                | structural molecule activity;transporter activity                          | 4.995      | 5.813      | 1.16 |
| P07246   | Alcohol dehydrogenase 3, mitochondrial [OS=Saccharomyces cerevisiae S288c]                                  | 85510<br>7 | ADH3;<br>YMR08<br>3W        | metabolic process                                                                   | mitochondrion;organelle lumen         | catalytic activity;metal ion binding                                       | 2.34       | 2.728      | 1.17 |
| P32796-1 | Carnitine O-acetyltransferase, mitochondrial [OS=Saccharomyces cerevisiae S288c]                            | 85496<br>5 | CAT2;<br>YML04<br>2W        | metabolic process;transport                                                         | membrane;mitochondrion                | catalytic activity                                                         | 2.44       | 2.849      | 1.17 |
| P00830   | ATP synthase subunit beta, mitochondrial [OS=Saccharomyces cerevisiae S288c]                                | 85358<br>5 | ATP2;<br>YJR121<br>W        | metabolic process;transport                                                         | cytosol;membrane;mitochondrion        | catalytic activity;nucleotide binding;protein binding;transporter activity | 17.47<br>8 | 20.54<br>4 | 1.18 |
| P53326   | Uncharacterized protein YGR266W [OS=Saccharomyces cerevisiae S288c]                                         | 85318<br>2 | YGR26<br>6W;<br>YGR26<br>6W |                                                                                     | membrane;mitochondrion                |                                                                            | 0.369      | 0.442      | 1.20 |
| P32191   | Glycerol-3-phosphate dehydrogenase, mitochondrial [OS=Saccharomyces cerevisiae S288c]                       | 85465<br>1 | GUT2;<br>YIL155<br>C        | metabolic process                                                                   | membrane;mitochondrion                | catalytic activity                                                         | 2.574      | 3.14       | 1.22 |
| Q02486   | ARS-binding factor 2, mitochondrial [OS=Saccharomyces cerevisiae S288c]                                     | 85509<br>4 | ABF2;<br>YMR07<br>2W        | cell organization and biogenesis;metabolic process;regulation of biological process | chromosome;mitochondrion;nucleus      | DNA binding                                                                | 7.377      | 9          | 1.22 |
| P00560   | Phosphoglycerate kinase [OS=Saccharomyces cerevisiae S288c]                                                 | 85037<br>0 | PGK1;<br>YCR012<br>W        | metabolic process                                                                   | cytoplasm;membrane;mitochondrion      | catalytic activity;nucleotide binding                                      | 2.981      | 3.642      | 1.22 |
| P39522   | Dihydroxy-acid dehydratase, mitochondrial [OS=Saccharomyces cerevisiae S288c]                               | 85347<br>3 | ILV3;<br>YJR016<br>C        | metabolic process                                                                   | mitochondrion                         | catalytic activity;metal ion binding                                       | 2.054      | 2.511      | 1.22 |
| P53206   | putative cysteine synthase [OS=Saccharomyces cerevisiae S288c]                                              | 85289<br>5 | YGR01<br>2W;<br>YGR01<br>2W | metabolic process                                                                   |                                       | catalytic activity                                                         | 0.668      | 0.817      | 1.22 |
| Q12482   | Mitochondrial aspartate-glutamate transporter AGC1 [OS=Saccharomyces cerevisiae S288c]                      | 85613<br>2 | AGC1;<br>YPR021<br>C        | metabolic process;transport                                                         | membrane;mitochondrion                | structural molecule activity;transporter activity                          | 0.238      | 0.292      | 1.23 |

|        |                                                                                                                                              |        |                        |                                                                                                                           |                                                 |                                                           |       |        |      |
|--------|----------------------------------------------------------------------------------------------------------------------------------------------|--------|------------------------|---------------------------------------------------------------------------------------------------------------------------|-------------------------------------------------|-----------------------------------------------------------|-------|--------|------|
| Q00711 | Succinate dehydrogenase [ubiquinone] flavoprotein subunit, mitochondrial [OS=Saccharomyces cerevisiae S288c]                                 | 853709 | SDH1; YKL148C          | metabolic process;transport                                                                                               | membrane;mitochondrion                          | catalytic activity;nucleotide binding;protein binding     | 3.072 | 3.819  | 1.24 |
| Q08223 | Altered inheritance of mitochondria protein 39, mitochondrial [OS=Saccharomyces cerevisiae S288c]                                            | 854103 | AIM39; YOL053W         |                                                                                                                           | cytosol;membrane;mitochondrion                  |                                                           | 0.468 | 0.585  | 1.25 |
| Q00402 | Nuclear migration protein NUM1 [OS=Saccharomyces cerevisiae S288c]                                                                           | 851727 | NUM1; YDR150W          | cell organization and biogenesis;cellular component movement;metabolic process;regulation of biological process;transport | endoplasmic reticulum;mitochondrion             | catalytic activity;motor activity;protein binding         | 0.052 | 0.065  | 1.25 |
| Q12166 | 2-isopropylmalate synthase 2, mitochondrial [OS=Saccharomyces cerevisiae S288c]                                                              | 854275 | LEU9; YOR108W          | metabolic process                                                                                                         | mitochondrion                                   | catalytic activity;protein binding                        | 1.11  | 1.39   | 1.25 |
| Q06493 | LETM1 domain-containing protein YLH47, mitochondrial [OS=Saccharomyces cerevisiae S288c]                                                     | 856243 | YLH47; YPR125W         | cell organization and biogenesis;transport                                                                                | membrane;mitochondrion                          |                                                           | 0.487 | 0.61   | 1.25 |
| Q12117 | Protein MRH1 [OS=Saccharomyces cerevisiae S288c]                                                                                             | 851597 | MRH1; YDR033W          | transport                                                                                                                 | endoplasmic reticulum;membrane;mitochondrion    | transporter activity                                      | 2.831 | 3.642  | 1.29 |
| P27929 | 37S ribosomal protein NAM9, mitochondrial [OS=Saccharomyces cerevisiae S288c]                                                                | 855585 | NAM9; YNL137C          | cell organization and biogenesis;metabolic process;regulation of biological process                                       | mitochondrion;ribosome                          | RNA binding;structural molecule activity                  | 0.301 | 0.389  | 1.29 |
| Q08023 | Protein FMP25, mitochondrial [OS=Saccharomyces cerevisiae S288c]                                                                             | 850766 | FMP25; YLR077W         | cell organization and biogenesis                                                                                          | membrane;mitochondrion                          |                                                           | 0.968 | 1.254  | 1.30 |
| P39518 | Long-chain-fatty-acid--CoA ligase 2 [OS=Saccharomyces cerevisiae S288c]                                                                      | 856734 | FAA2; YER015W          | metabolic process;transport                                                                                               | cytoplasm;mitochondrion                         | catalytic activity;nucleotide binding                     | 0.619 | 0.802  | 1.30 |
| P47045 | mitochondrial import inner membrane translocase subunit TIM54 [OS=Saccharomyces cerevisiae S288c]                                            | 853392 | TIM54; YJL054W         | cell organization and biogenesis;transport                                                                                | cytosol;membrane;mitochondrion                  | transporter activity                                      | 0.334 | 0.433  | 1.30 |
| P52893 | probable alanine aminotransferase, mitochondrial [OS=Saccharomyces cerevisiae S288c]                                                         | 850778 | ALT1; YLR089C          | metabolic process                                                                                                         | mitochondrion;organelle lumen                   | catalytic activity                                        | 0.346 | 0.45   | 1.30 |
| P32891 | D-lactate dehydrogenase [cytochrome] 1, mitochondrial [OS=Saccharomyces cerevisiae S288c]                                                    | 851380 | DLD1; YDL174C          | metabolic process;transport                                                                                               | membrane;mitochondrion                          | catalytic activity;nucleotide binding                     | 2.875 | 3.748  | 1.30 |
| P04840 | Mitochondrial outer membrane protein porin 1 [OS=Saccharomyces cerevisiae S288c]                                                             | 855669 | POR1; YNL055C          | cell death;cell organization and biogenesis;cellular homeostasis;regulation of biological process;transport               | cytoplasm;membrane;mitochondrion                | transporter activity                                      | 9     | 11.743 | 1.30 |
| P12695 | Dihydrolipoyllysine-residue acetyltransferase component of pyruvate dehydrogenase complex, mitochondrial [OS=Saccharomyces cerevisiae S288c] | 855653 | LAT1; YNL071W          | metabolic process                                                                                                         | mitochondrion;organelle lumen                   | catalytic activity                                        | 3.758 | 4.946  | 1.32 |
| P09624 | Dihydrolipoyl dehydrogenase, mitochondrial [OS=Saccharomyces cerevisiae S288c]                                                               | 850527 | LPD1; YFL018C          | cellular homeostasis;metabolic process;regulation of biological process                                                   | mitochondrion;organelle lumen                   | catalytic activity;nucleotide binding                     | 9.701 | 13.03  | 1.34 |
| P07213 | Mitochondrial import receptor subunit TOM70 [OS=Saccharomyces cerevisiae S288c]                                                              | 855602 | TOM70; YNL121C         | cell organization and biogenesis;transport                                                                                | membrane;mitochondrion                          | protein binding;transporter activity                      | 1.154 | 1.572  | 1.36 |
| P36013 | NAD-dependent malic enzyme, mitochondrial [OS=Saccharomyces cerevisiae S288c]                                                                | 853839 | MAE1; YKL029C          | metabolic process                                                                                                         | mitochondrion;organelle lumen                   | catalytic activity;metal ion binding;nucleotide binding   | 0.496 | 0.679  | 1.37 |
| Q07349 | MIOREX complex component 9 [OS=Saccharomyces cerevisiae S288c]                                                                               | 851535 | YDL027C; MRX9; YDL027C |                                                                                                                           | endoplasmic reticulum;membrane;mitochondrion    |                                                           | 0.931 | 1.276  | 1.37 |
| P08417 | fumarate hydratase, mitochondrial [OS=Saccharomyces cerevisiae S288c]                                                                        | 855866 | FUM1; YPL262W          | cell organization and biogenesis;metabolic process                                                                        | cytoplasm;cytosol;mitochondrion;organelle lumen | catalytic activity                                        | 2.562 | 3.52   | 1.37 |
| P05626 | ATP synthase subunit 4, mitochondrial [OS=Saccharomyces cerevisiae S288c]                                                                    | 856027 | ATP4; YPL078C          | cell organization and biogenesis;metabolic process;transport                                                              | membrane;mitochondrion                          | catalytic activity;transporter activity                   | 3.084 | 4.275  | 1.39 |
| P47052 | succinate dehydrogenase [ubiquinone] flavoprotein subunit 2, mitochondrial [OS=Saccharomyces cerevisiae S288c]                               | 853405 | YJL045W; YJL045W       | metabolic process;transport                                                                                               | membrane;mitochondrion                          | catalytic activity;nucleotide binding                     | 1.11  | 1.543  | 1.39 |
| P53969 | Sorting assembly machinery 50 kDa subunit [OS=Saccharomyces cerevisiae S288c]                                                                | 855705 | SAM50; YNL026W         | cell organization and biogenesis;transport                                                                                | membrane;mitochondrion                          | protein binding;transporter activity                      | 0.269 | 0.374  | 1.39 |
| Q12289 | mitochondrial carnitine carrier [OS=Saccharomyces cerevisiae S288c]                                                                          | 854267 | CRC1; YOR100C          | metabolic process;transport                                                                                               | membrane;mitochondrion                          | structural molecule activity;transporter activity         | 1.683 | 2.34   | 1.39 |
| P00427 | Cytochrome c oxidase subunit 6, mitochondrial [OS=Saccharomyces cerevisiae S288c]                                                            | 856448 | COX6; YHR051W          | metabolic process;transport                                                                                               | membrane;mitochondrion                          | catalytic activity;metal ion binding;transporter activity | 1.154 | 1.61   | 1.40 |
| Q02883 | N-acyl-phosphatidylethanolamine-hydrolyzing phospholipase D, mitochondrial [OS=Saccharomyces cerevisiae S288c]                               | 856001 | FMP30; YPL103C         | metabolic process                                                                                                         | membrane;mitochondrion                          | catalytic activity;metal ion binding                      | 0.304 | 0.425  | 1.40 |

|        |                                                                                                        |        |                      |                                                                                      |                                        |                                                                           |        |       |      |
|--------|--------------------------------------------------------------------------------------------------------|--------|----------------------|--------------------------------------------------------------------------------------|----------------------------------------|---------------------------------------------------------------------------|--------|-------|------|
| P32335 | Protein MSS51, mitochondrial [OS=Saccharomyces cerevisiae S288c]                                       | 850900 | MSS51; YLR203C       | metabolic process;regulation of biological process                                   | membrane;mitochondrion                 | protein binding;translation regulator activity                            | 0.711  | 0.995 | 1.40 |
| P00044 | Cytochrome c iso-1 [OS=Saccharomyces cerevisiae S288c]                                                 | 853507 | CYC1; YJR048W        | metabolic process;transport                                                          | mitochondrion                          | metal ion binding;protein binding                                         | 4.623  | 6.499 | 1.41 |
| P40341 | Mitochondrial respiratory chain complexes assembly protein YTA12 [OS=Saccharomyces cerevisiae S288c]   | 855114 | YTA12; YMR089C       | cell organization and biogenesis;metabolic process;response to stimulus;transport    | cytoplasm;membrane;mitochondrion       | catalytic activity;metal ion binding;nucleotide binding;protein binding   | 0.778  | 1.096 | 1.41 |
| P54857 | lipase 2 [OS=Saccharomyces cerevisiae S288c]                                                           | 851628 | TGL2; YDR058C        | metabolic process;transport                                                          | mitochondrion                          | catalytic activity                                                        | 0.369  | 0.52  | 1.41 |
| P00424 | Cytochrome c oxidase polypeptide 5A, mitochondrial [OS=Saccharomyces cerevisiae S288c]                 | 855675 | COX5A; YNL052W       | metabolic process;transport                                                          | membrane;mitochondrion                 | catalytic activity;transporter activity                                   | 1.31   | 1.848 | 1.41 |
| P53163 | 54S ribosomal protein L12, mitochondrial [OS=Saccharomyces cerevisiae S288c]                           | 852811 | MNP1; YGL068W        | cell organization and biogenesis;metabolic process                                   | mitochondrion;ribosome                 | RNA binding;structural molecule activity                                  | 1.31   | 1.848 | 1.41 |
| P36046 | Mitochondrial intermembrane space import and assembly protein 40 [OS=Saccharomyces cerevisiae S288c]   | 853639 | MIA40; YKL195W       | cellular component movement;metabolic process;response to stimulus;transport         | membrane;mitochondrion                 | catalytic activity;protein binding;transporter activity                   | 0.817  | 1.154 | 1.41 |
| P32453 | Protein ATP11, mitochondrial [OS=Saccharomyces cerevisiae S288c]                                       | 855401 | ATP11; YNL315C       | cell organization and biogenesis                                                     | mitochondrion                          | protein binding                                                           | 0.413  | 0.585 | 1.42 |
| P33759 | 37S ribosomal protein S5, mitochondrial [OS=Saccharomyces cerevisiae S288c]                            | 852553 | MRP55; YBR251W       | cell organization and biogenesis;metabolic process                                   | mitochondrion;ribosome                 | RNA binding;structural molecule activity                                  | 0.413  | 0.585 | 1.42 |
| P38523 | GrpE protein homolog, mitochondrial [OS=Saccharomyces cerevisiae S288c]                                | 854407 | MGE1; YOR232W        | metabolic process;regulation of biological process;transport                         | membrane;mitochondrion;organelle lumen | enzyme regulator activity;nucleotide binding;protein binding              | 0.438  | 0.624 | 1.42 |
| P23644 | Mitochondrial import receptor subunit TOM40 [OS=Saccharomyces cerevisiae S288c]                        | 855243 | TOM40 ; YMR203W      | transport                                                                            | cytosol;membrane;mitochondrion         | protein binding;transporter activity                                      | 0.468  | 0.668 | 1.43 |
| P23833 | Protein SCO1, mitochondrial [OS=Saccharomyces cerevisiae S288c]                                        | 852325 | SCO1; YBR037C        | cell organization and biogenesis;cellular homeostasis;response to stimulus;transport | membrane;mitochondrion                 | antioxidant activity;catalytic activity;metal ion binding                 | 0.468  | 0.668 | 1.43 |
| P32378 | 4-hydroxybenzoate polyphenyltransferase, mitochondrial [OS=Saccharomyces cerevisiae S288c]             | 855778 | COQ2; YNR041C        | metabolic process;transport                                                          | membrane;mitochondrion                 | catalytic activity                                                        | 0.468  | 0.668 | 1.43 |
| P53889 | uncharacterized mitochondrial hydrolase FMP41 [OS=Saccharomyces cerevisiae S288c]                      | 855553 | FMP41; YNL168C       | metabolic process                                                                    | mitochondrion                          | catalytic activity;metal ion binding                                      | 0.501  | 0.719 | 1.44 |
| Q01852 | Mitochondrial import inner membrane translocase subunit TIM44 [OS=Saccharomyces cerevisiae S288c]      | 854790 | TIM44; YIL022W       | transport                                                                            | membrane;mitochondrion                 | nucleotide binding;protein binding                                        | 3.758  | 5.404 | 1.44 |
| P32340 | Rotenone-insensitive NADH-ubiquinone oxidoreductase, mitochondrial [OS=Saccharomyces cerevisiae S288c] | 854919 | NDI1; YML120C        | metabolic process;regulation of biological process                                   | membrane;mitochondrion;organelle lumen | catalytic activity;nucleotide binding                                     | 5.723  | 8.237 | 1.44 |
| Q99297 | Mitochondrial 2-oxodicarboxylate carrier 2 [OS=Saccharomyces cerevisiae S288c]                         | 854397 | ODC2; YOR222W        | metabolic process;transport                                                          | membrane;mitochondrion                 | structural molecule activity;transporter activity                         | 0.54   | 0.778 | 1.44 |
| P39925 | Mitochondrial respiratory chain complexes assembly protein AFG3 [OS=Saccharomyces cerevisiae S288c]    | 856737 | AFG3; YER017C        | cell organization and biogenesis;metabolic process;response to stimulus;transport    | membrane;mitochondrion                 | catalytic activity;metal ion binding;nucleotide binding;protein binding   | 0.569  | 0.823 | 1.45 |
| P07257 | Cytochrome b-c1 complex subunit 2, mitochondrial [OS=Saccharomyces cerevisiae S288c]                   | 856321 | QCR2; YPR191W        | metabolic process;transport                                                          | membrane;mitochondrion                 | catalytic activity;metal ion binding;protein binding;transporter activity | 17.588 | 25.49 | 1.45 |
| P00128 | Cytochrome b-c1 complex subunit 7 [OS=Saccharomyces cerevisiae S288c]                                  | 852142 | QCR7; YDR529C        | cell organization and biogenesis;metabolic process;transport                         | membrane;mitochondrion                 | catalytic activity;transporter activity                                   | 1.783  | 2.594 | 1.45 |
| P07256 | Cytochrome b-c1 complex subunit 1, mitochondrial [OS=Saccharomyces cerevisiae S288c]                   | 852235 | COR1; YBL045C        | metabolic process;transport                                                          | membrane;mitochondrion                 | catalytic activity;metal ion binding;protein binding;transporter activity | 5.529  | 8.183 | 1.48 |
| P53311 | Mitochondrial pyruvate carrier 3 [OS=Saccharomyces cerevisiae S288c]                                   | 853158 | FMP43; MPC3; YGR243W | transport                                                                            | membrane;mitochondrion                 | transporter activity                                                      | 0.778  | 1.154 | 1.48 |
| Q02776 | Mitochondrial import inner membrane translocase subunit TIM50 [OS=Saccharomyces cerevisiae S288c]      | 856042 | TIM50; YPL063W       | cell organization and biogenesis;metabolic process;transport                         | membrane;mitochondrion                 | catalytic activity;protein binding;transporter activity                   | 3.771  | 5.629 | 1.49 |
| P04710 | ADP,ATP carrier protein 1 [OS=Saccharomyces cerevisiae S288c]                                          | 855078 | AA1; YMR056C         | metabolic process;transport                                                          | cytosol;membrane;mitochondrion         | structural molecule activity;transporter activity                         | 5.952  | 9     | 1.51 |
| P23180 | Probable oxidoreductase AIM17 [OS=Saccharomyces cerevisiae S288c]                                      | 856365 | AIM17; YHL021C       | cell organization and biogenesis;metabolic process                                   | mitochondrion                          | catalytic activity;metal ion binding                                      | 0.995  | 1.512 | 1.52 |

|          |                                                                                                                      |        |                  |                                                                                              |                                                 |                                                                                     |         |         |      |
|----------|----------------------------------------------------------------------------------------------------------------------|--------|------------------|----------------------------------------------------------------------------------------------|-------------------------------------------------|-------------------------------------------------------------------------------------|---------|---------|------|
| P18239   | ADP,ATP carrier protein 2 [OS=Saccharomyces cerevisiae S288c]                                                        | 852250 | PET9; YBL030C    | cell death;metabolic process;transport                                                       | membrane;mitochondrion                          | structural molecule activity;transporter activity                                   | 110.034 | 167.761 | 1.52 |
| P16622   | Ferrochelatase, mitochondrial [OS=Saccharomyces cerevisiae S288c]                                                    | 854347 | HEM15; YOR176W   | metabolic process                                                                            | membrane;mitochondrion                          | catalytic activity                                                                  | 2.162   | 3.329   | 1.54 |
| P37298   | Succinate dehydrogenase [ubiquinone] cytochrome b small subunit, mitochondrial [OS=Saccharomyces cerevisiae S288c]   | 851758 | SDH4; YDR178W    | metabolic process;transport                                                                  | membrane;mitochondrion                          | catalytic activity;metal ion binding                                                | 1.154   | 1.783   | 1.55 |
| P21560   | Protein CBP3, mitochondrial [OS=Saccharomyces cerevisiae S288c]                                                      | 855886 | CBP3; YPL215W    | cell organization and biogenesis;regulation of biological process                            | membrane;mitochondrion;ribosome                 |                                                                                     | 1.219   | 1.894   | 1.55 |
| Q12466   | tricalbin-1 [OS=Saccharomyces cerevisiae S288c]                                                                      | 854253 | TCB1; YOR086C    | cell organization and biogenesis;regulation of biological process                            | endoplasmic reticulum;membrane;mitochondrion    | metal ion binding;protein binding                                                   | 0.369   | 0.574   | 1.56 |
| P28241   | Isocitrate dehydrogenase [NAD] subunit 2, mitochondrial [OS=Saccharomyces cerevisiae S288c]                          | 854303 | IDH2; YOR136W    | metabolic process                                                                            | mitochondrion;organelle lumen                   | catalytic activity;metal ion binding;nucleotide binding;protein binding;RNA binding | 2.34    | 3.642   | 1.56 |
| P36516   | 54S ribosomal protein L3, mitochondrial [OS=Saccharomyces cerevisiae S288c]                                          | 855039 | MRPL3; YMR024W   | cell organization and biogenesis;metabolic process;response to stimulus                      | mitochondrion;nucleus;ribosome                  | catalytic activity;RNA binding;structural molecule activity                         | 0.172   | 0.269   | 1.56 |
| P32266   | Dynammin-like GTPase MGM1, mitochondrial [OS=Saccharomyces cerevisiae S288c]                                         | 854386 | MGM1; YOR211C    | cell organization and biogenesis                                                             | membrane;mitochondrion                          | catalytic activity;nucleotide binding;protein binding                               | 0.179   | 0.28    | 1.56 |
| P29704   | squalene synthase [OS=Saccharomyces cerevisiae S288c]                                                                | 856597 | ERG9; YHR190W    | metabolic process                                                                            | endoplasmic reticulum;membrane;mitochondrion    | catalytic activity                                                                  | 0.222   | 0.35    | 1.58 |
| Q06892   | NADH kinase POS5, mitochondrial [OS=Saccharomyces cerevisiae S288c]                                                  | 855913 | POS5; YPL188W    | metabolic process;response to stimulus                                                       | mitochondrion;organelle lumen                   | catalytic activity;nucleotide binding                                               | 0.233   | 0.369   | 1.58 |
| P38885   | Altered inheritance of mitochondria protein 46, mitochondrial [OS=Saccharomyces cerevisiae S288c]                    | 856606 | AIM46; YHR199C   |                                                                                              | mitochondrion                                   | catalytic activity                                                                  | 0.245   | 0.389   | 1.59 |
| Q02981   | ABC1 family protein YPL109C, mitochondrial [OS=Saccharomyces cerevisiae S288c]                                       | 855995 | YPL109C; YPL109C |                                                                                              | mitochondrion                                   |                                                                                     | 0.259   | 0.413   | 1.59 |
| P43617   | Uncharacterized mitochondrial carrier YFR045W [OS=Saccharomyces cerevisiae S288c]                                    | 850606 | YFR045W; YFR045W | metabolic process;transport                                                                  | membrane;mitochondrion                          | structural molecule activity;transporter activity                                   | 0.259   | 0.413   | 1.59 |
| P36534   | 54S ribosomal protein L40, mitochondrial [OS=Saccharomyces cerevisiae S288c]                                         | 855930 | MRPL40; YPL173W  | cell organization and biogenesis;metabolic process                                           | mitochondrion;ribosome                          | protein binding;structural molecule activity                                        | 0.259   | 0.413   | 1.59 |
| P38300   | Inner membrane mitoribosome receptor MBA1, mitochondrial [OS=Saccharomyces cerevisiae S288c]                         | 852483 | MBA1; YBR185C    | cell organization and biogenesis;regulation of biological process                            | membrane;mitochondrion                          |                                                                                     | 0.259   | 0.413   | 1.59 |
| P38271   | Protein OPY1 [OS=Saccharomyces cerevisiae S288c]                                                                     | 852426 | OPY1; YBR129C    |                                                                                              | cytoplasm;mitochondrion                         |                                                                                     | 0.274   | 0.438   | 1.60 |
| P36521   | 54S ribosomal protein L11, mitochondrial [OS=Saccharomyces cerevisiae S288c]                                         | 851325 | MRPL11; YDL202W  | cell organization and biogenesis;metabolic process                                           | mitochondrion;ribosome                          | structural molecule activity                                                        | 0.274   | 0.438   | 1.60 |
| Q00873   | cytochrome c1 heme lyase [OS=Saccharomyces cerevisiae S288c]                                                         | 853775 | CYT2; YKL087C    | cell organization and biogenesis;metabolic process                                           | membrane;mitochondrion                          | catalytic activity;metal ion binding                                                | 0.359   | 0.585   | 1.63 |
| P49095   | Glycine dehydrogenase (Decarboxylating), mitochondrial [OS=Saccharomyces cerevisiae S288c]                           | 855227 | GCV2; YMR189W    | metabolic process                                                                            | cytosol;mitochondrion                           | catalytic activity                                                                  | 0.389   | 0.638   | 1.64 |
| P00927   | Threonine dehydratase, mitochondrial [OS=Saccharomyces cerevisiae S288c]                                             | 856819 | ILV1; YER086W    | metabolic process                                                                            | cytoplasm;mitochondrion                         | catalytic activity                                                                  | 0.425   | 0.701   | 1.65 |
| Q08822   | Probable electron transfer flavoprotein-ubiquinone oxidoreductase, mitochondrial [OS=Saccharomyces cerevisiae S288c] | 854538 | CIR2; YOR356W    | metabolic process;transport                                                                  | membrane;mitochondrion                          | catalytic activity;metal ion binding;nucleotide binding                             | 1.488   | 2.481   | 1.67 |
| P06208-1 | 2-isopropylmalate synthase [OS=Saccharomyces cerevisiae S288c]                                                       | 855619 | LEU4; YNL104C    | metabolic process                                                                            | cytoplasm;mitochondrion                         | catalytic activity;protein binding                                                  | 1.728   | 2.888   | 1.67 |
| P34227   | Mitochondrial peroxiredoxin PRX1 [OS=Saccharomyces cerevisiae S288c]                                                 | 852215 | PRX1; YBL064C    | cellular homeostasis;metabolic process;regulation of biological process;response to stimulus | mitochondrion                                   | antioxidant activity;catalytic activity                                             | 1.637   | 2.793   | 1.71 |
| P19414   | Aconitate hydratase, mitochondrial [OS=Saccharomyces cerevisiae S288c]                                               | 851013 | ACO1; YLR304C    | cell organization and biogenesis;metabolic process;transport                                 | cytoplasm;cytosol;mitochondrion;organelle lumen | catalytic activity;DNA binding;metal ion binding                                    | 10.053  | 17.233  | 1.71 |
| P32445   | Single-stranded DNA-binding protein RIM1, mitochondrial [OS=Saccharomyces cerevisiae S288c]                          | 850395 | RIM1; YCR028C-A  | cell organization and biogenesis;metabolic process;regulation of biological process          | mitochondrion                                   | DNA binding                                                                         | 0.668   | 1.154   | 1.73 |

|        |                                                                                                                                                                   |            |                                      |                                                                                                    |                                                 |                                                                                  |            |             |      |
|--------|-------------------------------------------------------------------------------------------------------------------------------------------------------------------|------------|--------------------------------------|----------------------------------------------------------------------------------------------------|-------------------------------------------------|----------------------------------------------------------------------------------|------------|-------------|------|
| P30624 | Long-chain-fatty-acid--CoA ligase 1<br>[OS=Saccharomyces cerevisiae S288c]                                                                                        | 85449<br>5 | FAA1;<br>YOR31<br>7W                 | metabolic process;transport                                                                        | endoplasmic<br>reticulum;membrane;mitochondrion | catalytic<br>activity;nucleotide<br>binding                                      | 2.427      | 4.259       | 1.75 |
| Q06485 | Autophagy-related protein 33<br>[OS=Saccharomyces cerevisiae S288c]                                                                                               | 85107<br>0 | ATG33;<br>YLR356<br>W                | cell communication;metabolic<br>process;response to stimulus                                       | membrane;mitochondrion                          |                                                                                  | 0.778      | 1.371       | 1.76 |
| P81449 | ATP synthase subunit e, mitochondrial<br>[OS=Saccharomyces cerevisiae S288c]                                                                                      | 85192<br>2 | TIM11;<br>YDR32<br>2C-A              | cell organization and<br>biogenesis;metabolic<br>process;transport                                 | membrane;mitochondrion                          | catalytic<br>activity;structural<br>molecule<br>activity;transporter<br>activity | 0.778      | 1.371       | 1.76 |
| P19262 | Dihydrolipoyllysine-residue<br>succinyltransferase component of 2-<br>oxoglutarate dehydrogenase complex,<br>mitochondrial [OS=Saccharomyces<br>cerevisiae S288c] | 85172<br>6 | KGD2;<br>YDR14<br>8C                 | cell organization and<br>biogenesis;metabolic process                                              | mitochondrion                                   | catalytic<br>activity;protein<br>binding                                         | 1.721      | 3.062       | 1.78 |
| P37299 | cytochrome b-c1 complex subunit 10<br>[OS=Saccharomyces cerevisiae S288c]                                                                                         | 85639<br>0 | QCR10;<br>YHR00<br>1W-A              | metabolic process;transport                                                                        | membrane;mitochondrion                          | catalytic<br>activity;transporter<br>activity                                    | 2.981      | 5.31        | 1.78 |
| Q06405 | ATP synthase subunit f, mitochondrial<br>[OS=Saccharomyces cerevisiae S288c]                                                                                      | 85198<br>3 | ATP17;<br>YDR37<br>7W                | metabolic process;transport                                                                        | membrane;mitochondrion                          | catalytic<br>activity;transporter<br>activity                                    | 2.981      | 5.31        | 1.78 |
| P09457 | ATP synthase subunit 5, mitochondrial<br>[OS=Saccharomyces cerevisiae S288c]                                                                                      | 85189<br>2 | ATP5;<br>YDR29<br>8C                 | metabolic process;transport                                                                        | membrane;mitochondrion                          | catalytic<br>activity;transporter<br>activity                                    | 5.813      | 10.36<br>5  | 1.78 |
| P32317 | Protein AFG1 [OS=Saccharomyces<br>cerevisiae S288c]                                                                                                               | 85665<br>8 | AFG1;<br>YEL052<br>W                 | cell organization and<br>biogenesis;metabolic<br>process;response to<br>stimulus;transport         | membrane;mitochondrion                          | catalytic<br>activity;nucleotide<br>binding                                      | 0.468      | 0.848       | 1.81 |
| P36101 | tRNA threonylcarbamoyladenine<br>dehydratase 2 [OS=Saccharomyces<br>cerevisiae S288c]                                                                             | 85384<br>1 | TCO2;<br>YKL027<br>W;<br>YKL027<br>W | metabolic process                                                                                  | cytosol;membrane;mitochondrion                  | catalytic<br>activity;nucleotide<br>binding                                      | 0.334      | 0.616       | 1.84 |
| P37293 | N-terminal acetyltransferase 2<br>[OS=Saccharomyces cerevisiae S288c]                                                                                             | 85305<br>0 | NAT2;<br>YGR14<br>7C                 | metabolic process                                                                                  | cytoplasm;mitochondrion                         | catalytic activity                                                               | 0.389      | 0.73        | 1.88 |
| P53736 | Uncharacterized protein YNR040W<br>[OS=Saccharomyces cerevisiae S288c]                                                                                            | 85577<br>6 | YNR04<br>0W;<br>YNR04<br>0W          |                                                                                                    | mitochondrion                                   |                                                                                  | 0.389      | 0.73        | 1.88 |
| P16547 | Mitochondrial outer membrane<br>protein OM45 [OS=Saccharomyces<br>cerevisiae S288c]                                                                               | 85467<br>0 | OM45;<br>YIL136<br>W                 |                                                                                                    | membrane;mitochondrion                          |                                                                                  | 82.17<br>6 | 157.4<br>89 | 1.92 |
| P36112 | MICOS complex subunit Mic60<br>[OS=Saccharomyces cerevisiae S288c]                                                                                                | 85388<br>6 | FCJ1;<br>MIC60;<br>YKR016<br>W       | cell organization and<br>biogenesis;transport                                                      | membrane;mitochondrion                          |                                                                                  | 5.629      | 10.78<br>8  | 1.92 |
| P50945 | MICOS complex subunit MIC27<br>[OS=Saccharomyces cerevisiae S288c]                                                                                                | 85562<br>3 | AIM37;<br>MIC27;<br>YNL100<br>W      | cell organization and biogenesis                                                                   | membrane;mitochondrion                          |                                                                                  | 0.501      | 0.968       | 1.93 |
| P36066 | Protein MRG3-like<br>[OS=Saccharomyces cerevisiae S288c]                                                                                                          | 85372<br>5 | YKL133<br>C;<br>YKL133<br>C          | metabolic process                                                                                  | membrane;mitochondrion                          | protein binding                                                                  | 0.334      | 0.655       | 1.96 |
| Q04013 | Citrate/oxoglutarate carrier protein<br>[OS=Saccharomyces cerevisiae S288c]                                                                                       | 85528<br>2 | YHM2;<br>YMR24<br>1W                 | cell organization and<br>biogenesis;metabolic<br>process;transport                                 | membrane;mitochondrion                          | DNA<br>binding;structural<br>molecule<br>activity;transporter<br>activity        | 1.512      | 2.981       | 1.97 |
| P33421 | Succinate dehydrogenase<br>[ubiquinone] cytochrome b subunit,<br>mitochondrial [OS=Saccharomyces<br>cerevisiae S288c]                                             | 85371<br>6 | SDH3;<br>YKL141<br>W                 | cell organization and<br>biogenesis;metabolic<br>process;transport                                 | membrane;mitochondrion                          | catalytic<br>activity;metal ion<br>binding                                       | 0.638      | 1.276       | 2.00 |
| P06168 | ketol-acid reductoisomerase,<br>mitochondrial [OS=Saccharomyces<br>cerevisiae S288c]                                                                              | 85106<br>9 | ILV5;<br>YLR355<br>C                 | cell organization and<br>biogenesis;metabolic process                                              | mitochondrion                                   | catalytic<br>activity;DNA<br>binding;metal ion<br>binding                        | 3.394      | 6.814       | 2.01 |
| P53266 | Cytochrome oxidase assembly protein<br>SHY1 [OS=Saccharomyces cerevisiae<br>S288c]                                                                                | 85300<br>9 | SHY1;<br>YGR11<br>2W                 | cell organization and biogenesis                                                                   | membrane;mitochondrion                          | protein binding                                                                  | 0.668      | 1.346       | 2.01 |
| P41921 | glutathione reductase<br>[OS=Saccharomyces cerevisiae S288c]                                                                                                      | 85601<br>4 | GLR1;<br>YPL091<br>W                 | cellular homeostasis;metabolic<br>process;regulation of biological<br>process;response to stimulus | cytoplasm;cytosol;mitochondrion                 | antioxidant<br>activity;catalytic<br>activity;nucleotide<br>binding              | 0.075      | 0.155       | 2.07 |
| Q12032 | Altered inheritance of mitochondria<br>protein 41, mitochondrial<br>[OS=Saccharomyces cerevisiae S288c]                                                           | 85439<br>0 | AIM41;<br>YOR21<br>5C                |                                                                                                    | mitochondrion                                   | catalytic activity                                                               | 0.778      | 1.61        | 2.07 |
| P38169 | Kynurenine 3-monooxygenase<br>[OS=Saccharomyces cerevisiae S288c]                                                                                                 | 85217<br>9 | BNA4;<br>YBL098<br>W                 | metabolic process                                                                                  | membrane;mitochondrion                          | catalytic<br>activity;nucleotide<br>binding                                      | 0.083      | 0.172       | 2.07 |
| P21375 | Fumarate reductase 2<br>[OS=Saccharomyces cerevisiae S288c]                                                                                                       | 85351<br>0 | OSM1;<br>YJR051<br>W                 | metabolic process                                                                                  | endoplasmic reticulum;mitochondrion             | catalytic<br>activity;nucleotide<br>binding                                      | 0.077      | 0.16        | 2.08 |
| P40961 | prohibitin-1 [OS=Saccharomyces<br>cerevisiae S288c]                                                                                                               | 85303<br>3 | PHB1;<br>YGR13<br>2C                 | cell organization and<br>biogenesis;metabolic<br>process;regulation of biological<br>process       | membrane;mitochondrion                          | protein binding                                                                  | 1.336      | 2.793       | 2.09 |

|        |                                                                                                   |            |                                      |                                                                                                                                       |                                                 |                                                                         |       |            |      |
|--------|---------------------------------------------------------------------------------------------------|------------|--------------------------------------|---------------------------------------------------------------------------------------------------------------------------------------|-------------------------------------------------|-------------------------------------------------------------------------|-------|------------|------|
| P40015 | inositol phosphosphingolipids phospholipase C [OS=Saccharomyces cerevisiae S288c]                 | 85673<br>9 | ISC1;<br>YER019<br>W                 | metabolic process;response to stimulus                                                                                                | endoplasmic reticulum;membrane;mitochondrion    | catalytic activity;metal ion binding                                    | 0.101 | 0.212      | 2.10 |
| P38771 | Ribosome-recycling factor, mitochondrial [OS=Saccharomyces cerevisiae S288c]                      | 85643<br>3 | RRF1;<br>YHR03<br>8W                 | cell organization and biogenesis;metabolic process                                                                                    | mitochondrion                                   | RNA binding                                                             | 0.145 | 0.311      | 2.14 |
| P38884 | Altered inheritance of mitochondria protein 18, mitochondrial [OS=Saccharomyces cerevisiae S288c] | 85660<br>5 | AIM18;<br>YHR19<br>8C                |                                                                                                                                       | mitochondrion                                   | catalytic activity                                                      | 0.145 | 0.311      | 2.14 |
| P32939 | GTP-binding protein ypt7 [OS=Saccharomyces cerevisiae S288c]                                      | 85501<br>2 | YPT7;<br>YML00<br>1W                 | cell communication;cell organization and biogenesis;metabolic process;regulation of biological process;response to stimulus;transport | cytosol;endosome;membrane;mitochondrion;vacuole | catalytic activity;nucleotide binding;protein binding                   | 0.166 | 0.359      | 2.16 |
| P07143 | Cytochrome c1, heme protein, mitochondrial [OS=Saccharomyces cerevisiae S288c]                    | 85423<br>1 | CYT1;<br>YOR06<br>5W                 | metabolic process;transport                                                                                                           | cytosol;membrane;mitochondrion                  | metal ion binding                                                       | 7.377 | 16.01<br>3 | 2.17 |
| Q04172 | Sensitive to high expression protein 9, mitochondrial [OS=Saccharomyces cerevisiae S288c]         | 85200<br>2 | SHE9;<br>YDR39<br>3W                 | cell organization and biogenesis                                                                                                      | membrane;mitochondrion                          |                                                                         | 0.172 | 0.374      | 2.17 |
| P35180 | mitochondrial import receptor subunit Tom20 [OS=Saccharomyces cerevisiae S288c]                   | 85297<br>3 | TOM20<br>;<br>YGR08<br>2W            | cell organization and biogenesis;transport                                                                                            | membrane;mitochondrion                          | protein binding;transporter activity                                    | 0.194 | 0.425      | 2.19 |
| P19955 | 37S ribosomal protein YMR-31, mitochondrial [OS=Saccharomyces cerevisiae S288c]                   | 85061<br>0 | YMR31<br>;<br>YFR049<br>W            | cell organization and biogenesis;metabolic process                                                                                    | mitochondrion;ribosome                          | catalytic activity;protein binding;structural molecule activity         | 1.154 | 2.594      | 2.25 |
| P18496 | Mitochondrial ATPase complex subunit ATP10 [OS=Saccharomyces cerevisiae S288c]                    | 85110<br>9 | ATP10;<br>YLR393<br>W                | cell organization and biogenesis                                                                                                      | cytoplasm;membrane;mitochondrion                | protein binding                                                         | 0.259 | 0.585      | 2.26 |
| P28625 | Protein YIM1 [OS=Saccharomyces cerevisiae S288c]                                                  | 85518<br>3 | YIM1;<br>YMR15<br>2W                 | metabolic process;response to stimulus                                                                                                | cytoplasm;endoplasmic reticulum;mitochondrion   | catalytic activity;metal ion binding                                    | 0.274 | 0.624      | 2.28 |
| P08067 | cytochrome b-c1 complex subunit Rieske, mitochondrial [OS=Saccharomyces cerevisiae S288c]         | 85668<br>9 | RIP1;<br>YEL024<br>W                 | metabolic process;transport                                                                                                           | membrane;mitochondrion                          | catalytic activity;metal ion binding;transporter activity               | 9     | 20.54<br>4 | 2.28 |
| Q07651 | SUR7 family protein FMP45 [OS=Saccharomyces cerevisiae S288c]                                     | 85130<br>4 | FMP45;<br>YDL222<br>C                | cell differentiation;cell organization and biogenesis                                                                                 | membrane;mitochondrion                          |                                                                         | 3.924 | 9          | 2.29 |
| Q03327 | Mitochondrial fusion and transport protein Ugo1 [OS=Saccharomyces cerevisiae S288c]               | 85208<br>1 | UGO1;<br>YDR47<br>0C                 | cell organization and biogenesis;metabolic process                                                                                    | membrane;mitochondrion                          | protein binding;structural molecule activity                            | 0.304 | 0.701      | 2.31 |
| P46998 | mitochondrial membrane protein FMP33 [OS=Saccharomyces cerevisiae S288c]                          | 85327<br>9 | FMP33;<br>YJL161<br>W                |                                                                                                                                       | membrane;mitochondrion                          |                                                                         | 0.334 | 0.778      | 2.33 |
| P36060 | NADH-cytochrome b5 reductase 2 [OS=Saccharomyces cerevisiae S288c]                                | 85370<br>7 | MCR1;<br>YKL150<br>W                 | metabolic process;response to stimulus                                                                                                | membrane;mitochondrion                          | catalytic activity;protein binding                                      | 2.793 | 6.848      | 2.45 |
| P37267 | Assembly factor cbp4 [OS=Saccharomyces cerevisiae S288c]                                          |            | CBP4                                 | cell organization and biogenesis                                                                                                      | membrane;mitochondrion                          |                                                                         | 0.52  | 1.31       | 2.52 |
| P40098 | uncharacterized mitochondrial membrane protein FMP10 [OS=Saccharomyces cerevisiae S288c]          | 85693<br>1 | FMP10;<br>YER182<br>W                |                                                                                                                                       | membrane;mitochondrion                          |                                                                         | 1.069 | 2.793      | 2.61 |
| Q12029 | Probable mitochondrial transport protein fsf1 [OS=Saccharomyces cerevisiae S288c]                 | 85444<br>5 | FSF1;<br>YOR27<br>1C                 | transport                                                                                                                             | membrane;mitochondrion                          | transporter activity                                                    | 0.624 | 1.637      | 2.62 |
| P21306 | ATP synthase subunit epsilon, mitochondrial [OS=Saccharomyces cerevisiae S288c]                   | 85585<br>7 | ATP15;<br>YPL271<br>W                | metabolic process;transport                                                                                                           | membrane;mitochondrion                          | catalytic activity;transporter activity                                 | 0.778 | 2.162      | 2.78 |
| P38969 | Pentamidine resistance factor, mitochondrial [OS=Saccharomyces cerevisiae S288c]                  | 85444<br>0 | PNT1;<br>YOR26<br>6W                 | cell organization and biogenesis;response to stimulus                                                                                 | membrane;mitochondrion                          |                                                                         | 0.166 | 0.468      | 2.82 |
| P21954 | Isocitrate dehydrogenase [NADP], mitochondrial [OS=Saccharomyces cerevisiae S288c]                | 85149<br>3 | IDP1;<br>YDL066<br>W                 | metabolic process                                                                                                                     | mitochondrion                                   | catalytic activity;metal ion binding;nucleotide binding;protein binding | 4.412 | 12.59<br>4 | 2.85 |
| Q06567 | ABC1 family protein MCP2 [OS=Saccharomyces cerevisiae S288c]                                      | 85095<br>5 | YLR253<br>W;<br>MCP2;<br>YLR253<br>W | cell organization and biogenesis                                                                                                      | membrane;mitochondrion                          |                                                                         | 0.068 | 0.218      | 3.21 |
| P39006 | Phosphatidylserine decarboxylase proenzyme 1, mitochondrial [OS=Saccharomyces cerevisiae S288c]   | 85555<br>2 | PSD1;<br>YNL169<br>C                 | metabolic process;regulation of biological process                                                                                    | membrane;mitochondrion                          | catalytic activity                                                      | 0.083 | 0.269      | 3.24 |
| P32839 | Mitochondrial chaperone BCS1 [OS=Saccharomyces cerevisiae S288c]                                  | 85198<br>1 | BCS1;<br>YDR37<br>5C                 | cell organization and biogenesis;metabolic process;response to stimulus;transport                                                     | cytosol;membrane;mitochondrion                  | catalytic activity;nucleotide binding;transporter activity              | 0.093 | 0.304      | 3.27 |
| Q06678 | 54S ribosomal protein L35, mitochondrial [OS=Saccharomyces cerevisiae S288c]                      | 85192<br>1 | MRPL3<br>5;<br>YDR32<br>2W           | cell organization and biogenesis;metabolic process                                                                                    | mitochondrion;ribosome                          | structural molecule activity                                            | 0.093 | 0.304      | 3.27 |
| P42949 | Mitochondrial import inner membrane translocase subunit TIM16 [OS=Saccharomyces cerevisiae S288c] | 85334<br>0 | PAM16<br>;<br>YJL104<br>W            | transport                                                                                                                             | membrane;mitochondrion                          | protein binding                                                         | 0.233 | 0.874      | 3.75 |



|        |                                                                                                   |        |                  |                                                    |                                                               |                                                                |       |       |      |
|--------|---------------------------------------------------------------------------------------------------|--------|------------------|----------------------------------------------------|---------------------------------------------------------------|----------------------------------------------------------------|-------|-------|------|
| P39515 | mitochondrial import inner membrane translocase subunit Tim17 [OS=Saccharomyces cerevisiae S288c] | 853298 | TIM17; YJL143 W  | cell organization and biogenesis;transport         | membrane;mitochondrion                                        | protein binding;transporter activity                           | 0.334 | 1.371 | 4.10 |
| P39952 | Mitochondrial inner membrane protein OXA1 [OS=Saccharomyces cerevisiae S288c]                     | 856898 | OXA1; YER154 W   | cell organization and biogenesis;transport         | membrane;mitochondrion                                        | transporter activity                                           | 0.778 | 3.217 | 4.13 |
| P25087 | Sterol 24-C-methyltransferase [OS=Saccharomyces cerevisiae S288c]                                 | 855003 | ERG6; YML008C    | metabolic process                                  | endoplasmic reticulum;membrane;mitochondrion                  | catalytic activity                                             | 0.425 | 1.894 | 4.46 |
| Q01574 | acetyl-coenzyme A synthetase 1 [OS=Saccharomyces cerevisiae S288c]                                | 851245 | ACS1; YAL054 C   | cell organization and biogenesis;metabolic process | cytoplasm;cytosol;endoplasmic reticulum;mitochondrion;nucleus | catalytic activity;nucleotide binding                          | 0.624 | 2.793 | 4.48 |
| P08525 | Cytochrome b-c1 complex subunit 8 [OS=Saccharomyces cerevisiae S288c]                             | 853273 | QCR8; YJL166 W   | metabolic process;transport                        | membrane;mitochondrion                                        | catalytic activity;transporter activity                        | 0.585 | 2.981 | 5.10 |
| P30902 | ATP synthase subunit d, mitochondrial [OS=Saccharomyces cerevisiae S288c]                         | 853853 | ATP7; YKL016 C   | metabolic process;transport                        | membrane;mitochondrion                                        | catalytic activity;transporter activity                        | 1.683 | 9     | 5.35 |
| Q07914 | mitochondrial import inner membrane translocase subunit TIM14 [OS=Saccharomyces cerevisiae S288c] | 850694 | PAM18 ; YLR008 C | regulation of biological process;transport         | membrane;mitochondrion                                        | enzyme regulator activity;protein binding;transporter activity | 0.334 | 3.217 | 9.63 |

**Supplemental Table S14. The relative concentrations of proteins in mitochondria purified from *ups2Δ* cells cultured with or without LCA.** Mitochondria were purified from *ups2Δ* cells recovered on day 4 of cell culturing with or without LCA. Mass spectrometry-based identification and quantitation of proteins recovered in purified mitochondria were performed as described in Materials and methods. The exponentially modified protein abundance index (emPAI) provided by the "Proteome Discoverer" software was used to calculate the relative abundance of mitochondrial proteins between specified datasets. Data on the relative concentrations of mitochondrial proteins are presented as means of 2 independent experiments.

| Accession | Description                                                                                                   | Entre<br>z<br>Gene<br>ID | Gene<br>ID      | Biological Process                                                                                       | Cellular Component                                            | Molecular<br>Function                                       | emP<br>AI<br><i>ups2</i> | emPAI<br><i>ups2</i> +<br>LCA | RATI<br>O<br><i>ups2</i> +<br>LCA<br>/<br><i>ups2</i> |
|-----------|---------------------------------------------------------------------------------------------------------------|--------------------------|-----------------|----------------------------------------------------------------------------------------------------------|---------------------------------------------------------------|-------------------------------------------------------------|--------------------------|-------------------------------|-------------------------------------------------------|
| P25578    | CDP-diacylglycerol-glycerol-3-phosphate 3-phosphatidyltransferase [OS= <i>Saccharomyces cerevisiae</i> S288c] | 850352                   | PGS1; YCL004W   | metabolic process                                                                                        | mitochondrion                                                 | catalytic activity;nucleotide binding                       | 0.374                    | 0.083                         | 0.22                                                  |
| P36526    | 54S ribosomal protein L27, mitochondrial [OS= <i>Saccharomyces cerevisiae</i> S288c]                          | 852585                   | MRPL27; YBR282W | cell organization and biogenesis;metabolic process                                                       | mitochondrion;ribosome                                        | structural molecule activity                                | 0.995                    | 0.259                         | 0.26                                                  |
| P24720    | Protein MNE1 [OS= <i>Saccharomyces cerevisiae</i> S288c]                                                      | 854532                   | MNE1; YOR35OC   | metabolic process                                                                                        | cytoplasm;mitochondrion;organelle lumen                       |                                                             | 0.194                    | 0.061                         | 0.31                                                  |
| Q01574    | acetyl-coenzyme A synthetase 1 [OS= <i>Saccharomyces cerevisiae</i> S288c]                                    | 851245                   | ACS1; YAL054C   | cell organization and biogenesis;metabolic process                                                       | cytoplasm;cytosol;endoplasmic reticulum;mitochondrion;nucleus | catalytic activity;nucleotide binding                       | 0.947                    | 0.354                         | 0.37                                                  |
| P36527    | 54S ribosomal protein L28, mitochondrial [OS= <i>Saccharomyces cerevisiae</i> S288c]                          | 852073                   | MRPL28; YDR462W | cell organization and biogenesis;metabolic process                                                       | mitochondrion;ribosome                                        | structural molecule activity                                | 0.52                     | 0.233                         | 0.45                                                  |
| P12687    | 54S ribosomal protein L2, mitochondrial [OS= <i>Saccharomyces cerevisiae</i> S288c]                           | 855727                   | MRP7; YNL005C   | cell organization and biogenesis;metabolic process                                                       | mitochondrion;ribosome                                        | catalytic activity;RNA binding;structural molecule activity | 2.899                    | 1.31                          | 0.45                                                  |
| Q03799    | 37S ribosomal protein S8, mitochondrial [OS= <i>Saccharomyces cerevisiae</i> S288c]                           | 855190                   | MRP58; YMR158W  | cell organization and biogenesis;metabolic process                                                       | mitochondrion;ribosome                                        | structural molecule activity                                | 0.425                    | 0.194                         | 0.46                                                  |
| Q06630    | Mitochondrial homologous recombination protein 1 [OS= <i>Saccharomyces cerevisiae</i> S288c]                  | 851890                   | MHR1; YDR296W   | cell organization and biogenesis;metabolic process;regulation of biological process;response to stimulus | mitochondrion;nucleus                                         | catalytic activity;DNA binding;structural molecule activity | 0.359                    | 0.166                         | 0.46                                                  |
| P54115    | Magnesium-activated aldehyde dehydrogenase, cytosolic [OS= <i>Saccharomyces cerevisiae</i> S288c]             | 856044                   | ALD6; YPL061W   | metabolic process;response to stimulus                                                                   | cytoplasm;cytosol;mitochondrion                               | catalytic activity                                          | 0.346                    | 0.16                          | 0.46                                                  |
| P32378    | 4-hydroxybenzoate polyprenyltransferase, mitochondrial [OS= <i>Saccharomyces cerevisiae</i> S288c]            | 855778                   | COQ2; YNR041C   | metabolic process;transport                                                                              | membrane;mitochondrion                                        | catalytic activity                                          | 0.292                    | 0.136                         | 0.47                                                  |
| P49954    | probable hydrolase NIT3 [OS= <i>Saccharomyces cerevisiae</i> S288c]                                           | 851065                   | NIT3; YLR351C   | metabolic process                                                                                        | cytoplasm;mitochondrion                                       | catalytic activity                                          | 0.274                    | 0.129                         | 0.47                                                  |
| P38746    | Obg-like ATPase homolog [OS= <i>Saccharomyces cerevisiae</i> S288c]                                           | 856372                   | YLF2; YHL014C   |                                                                                                          | mitochondrion                                                 | nucleotide binding                                          | 0.194                    | 0.093                         | 0.48                                                  |
| P38705    | Serine--tRNA ligase, mitochondrial [OS= <i>Saccharomyces cerevisiae</i> S288c]                                | 856402                   | DIA4; YHR011W   | metabolic process                                                                                        | cytoplasm;mitochondrion;organelle lumen                       | catalytic activity;nucleotide binding                       | 0.15                     | 0.072                         | 0.48                                                  |
| P36056    | 37S ribosomal protein S22, mitochondrial [OS= <i>Saccharomyces cerevisiae</i> S288c]                          | 853701                   | RSM22; YKL155C  | cell organization and biogenesis;metabolic process                                                       | mitochondrion;ribosome                                        | catalytic activity;structural molecule activity             | 0.125                    | 0.061                         | 0.49                                                  |
| P15108    | ATP-dependent molecular chaperone HSC82 [OS= <i>Saccharomyces cerevisiae</i> S288c]                           | 855224                   | HSC82; YMR186W  | cell organization and biogenesis;metabolic process;response to stimulus                                  | cytoplasm;membrane;mitochondrion                              | catalytic activity;nucleotide binding;protein binding       | 0.602                    | 0.299                         | 0.50                                                  |
| Q08223    | Altered inheritance of mitochondria protein 39, mitochondrial [OS= <i>Saccharomyces cerevisiae</i> S288c]     | 854103                   | AIM39; YOL053W  |                                                                                                          | cytosol;membrane;mitochondrion                                |                                                             | 0.468                    | 0.259                         | 0.55                                                  |
| P39112    | Exoribonuclease II, mitochondrial [OS= <i>Saccharomyces cerevisiae</i> S288c]                                 | 855331                   | DSS1; YMR287C   | metabolic process                                                                                        | mitochondrion;organelle lumen                                 | catalytic activity;RNA binding                              | 0.233                    | 0.134                         | 0.58                                                  |
| Q02486    | ARS-binding factor 2, mitochondrial [OS= <i>Saccharomyces cerevisiae</i> S288c]                               | 855094                   | ABF2; YMR072W   | cell organization and biogenesis;metabolic process;regulation of biological process                      | chromosome;mitochondrion;nucleus                              | DNA binding                                                 | 33.551                   | 19.309                        | 0.58                                                  |
| Q03430    | 37S ribosomal protein RSM28, mitochondrial [OS= <i>Saccharomyces cerevisiae</i> S288c]                        | 852105                   | RSM28; YDR494W  | cell organization and biogenesis;metabolic process                                                       | mitochondrion;ribosome                                        | structural molecule activity                                | 3.489                    | 2.008                         | 0.58                                                  |

|        |                                                                                                              |        |                 |                                                                                                                                       |                                                 |                                                                           |       |       |      |
|--------|--------------------------------------------------------------------------------------------------------------|--------|-----------------|---------------------------------------------------------------------------------------------------------------------------------------|-------------------------------------------------|---------------------------------------------------------------------------|-------|-------|------|
| P49334 | Mitochondrial import receptor subunit tom22 [OS=Saccharomyces cerevisiae S288c]                              | 855592 | TOM22 ; YNL131W | cell organization and biogenesis;transport                                                                                            | membrane;mitochondrion                          | protein binding;transporter activity                                      | 1.154 | 0.668 | 0.58 |
| P53732 | 37S ribosomal protein S12, mitochondrial [OS=Saccharomyces cerevisiae S288c]                                 | 855772 | MRPS12; YNR036C | cell organization and biogenesis;metabolic process                                                                                    | mitochondrion;ribosome                          | structural molecule activity                                              | 1.154 | 0.668 | 0.58 |
| P40033 | 37S ribosomal protein rsm18, mitochondrial [OS=Saccharomyces cerevisiae S288c]                               | 856776 | RSM18; YER050C  | cell organization and biogenesis;metabolic process                                                                                    | mitochondrion;ribosome                          | structural molecule activity                                              | 0.995 | 0.585 | 0.59 |
| P23369 | 54S ribosomal protein L25, mitochondrial [OS=Saccharomyces cerevisiae S288c]                                 | 852967 | MRPL25; YGR076C | cell organization and biogenesis;metabolic process                                                                                    | mitochondrion;ribosome                          | structural molecule activity                                              | 0.874 | 0.52  | 0.59 |
| P33421 | Succinate dehydrogenase [ubiquinone] cytochrome b subunit, mitochondrial [OS=Saccharomyces cerevisiae S288c] | 853716 | SDH3; YKL141W   | cell organization and biogenesis;metabolic process;transport                                                                          | membrane;mitochondrion                          | catalytic activity;metal ion binding                                      | 0.638 | 0.389 | 0.61 |
| P32939 | GTP-binding protein ypt7 [OS=Saccharomyces cerevisiae S288c]                                                 | 855012 | YPT7; YML001W   | cell communication;cell organization and biogenesis;metabolic process;regulation of biological process;response to stimulus;transport | cytosol;endosome;membrane;mitochondrion;vacuole | catalytic activity;nucleotide binding;protein binding                     | 0.585 | 0.359 | 0.61 |
| P27697 | Atypical kinase COQ8, mitochondrial [OS=Saccharomyces cerevisiae S288c]                                      | 852758 | COQ8; YGL119W   | metabolic process                                                                                                                     | membrane;mitochondrion;organelle lumen          | catalytic activity;nucleotide binding                                     | 0.453 | 0.283 | 0.62 |
| Q04599 | 54S ribosomal protein L1, mitochondrial [OS=Saccharomyces cerevisiae S288c]                                  | 851694 | MRPL1; YDR116C  | cell organization and biogenesis;metabolic process                                                                                    | mitochondrion;ribosome                          | RNA binding;structural molecule activity                                  | 0.438 | 0.274 | 0.63 |
| P38152 | Tricarboxylate transport protein [OS=Saccharomyces cerevisiae S288c]                                         | 852594 | CTP1; YBR291C   | metabolic process;transport                                                                                                           | membrane;mitochondrion                          | structural molecule activity;transporter activity                         | 0.389 | 0.245 | 0.63 |
| P36528 | 54S ribosomal protein L17, mitochondrial [OS=Saccharomyces cerevisiae S288c]                                 | 855469 | MRPL17; YNL252C | cell organization and biogenesis;metabolic process                                                                                    | mitochondrion;ribosome                          | structural molecule activity                                              | 0.369 | 0.233 | 0.63 |
| P38910 | 10 kDa heat shock protein, mitochondrial [OS=Saccharomyces cerevisiae S288c]                                 | 854185 | HSP10; YOR020C  | cell organization and biogenesis;metabolic process;response to stimulus;transport                                                     | cytoplasm;mitochondrion;organelle lumen         | metal ion binding;nucleotide binding;protein binding                      | 2.162 | 1.371 | 0.63 |
| P38702 | mitochondrial carrier protein LEU5 [OS=Saccharomyces cerevisiae S288c]                                       | 856391 | LEU5; YHR002W   | metabolic process;transport                                                                                                           | membrane;mitochondrion                          | structural molecule activity;transporter activity                         | 0.334 | 0.212 | 0.63 |
| P40458 | Autophagy-related protein 32 [OS=Saccharomyces cerevisiae S288c]                                             | 854660 | ATG32; YIL146C  | metabolic process                                                                                                                     | membrane;mitochondrion;vacuole                  | protein binding                                                           | 0.318 | 0.202 | 0.64 |
| P22438 | Methionine--tRNA ligase, mitochondrial [OS=Saccharomyces cerevisiae S288c]                                   | 853081 | MSM1; YGR171C   | metabolic process                                                                                                                     | cytoplasm;cytosol;mitochondrion;organelle lumen | catalytic activity;nucleotide binding                                     | 0.212 | 0.136 | 0.64 |
| P25626 | 54S ribosomal protein IMG1, mitochondrial [OS=Saccharomyces cerevisiae S288c]                                | 850413 | IMG1; YCR046C   | cell organization and biogenesis;metabolic process                                                                                    | mitochondrion;ribosome                          | structural molecule activity                                              | 1.031 | 0.701 | 0.68 |
| P40364 | Mitochondrial peculiar membrane protein 1 [OS=Saccharomyces cerevisiae S288c]                                | 853379 | MPM1; YJL066C   |                                                                                                                                       | membrane;mitochondrion                          |                                                                           | 0.848 | 0.585 | 0.69 |
| P04803 | Tryptophan--tRNA ligase, mitochondrial [OS=Saccharomyces cerevisiae S288c]                                   | 851861 | MSW1; YDR268W   | metabolic process                                                                                                                     | cytoplasm;mitochondrion;organelle lumen         | catalytic activity;nucleotide binding                                     | 0.668 | 0.468 | 0.70 |
| Q12289 | mitochondrial carnitine carrier [OS=Saccharomyces cerevisiae S288c]                                          | 854267 | CRC1; YOR100C   | metabolic process;transport                                                                                                           | membrane;mitochondrion                          | structural molecule activity;transporter activity                         | 1.994 | 1.404 | 0.70 |
| Q08245 | protein ZEO1 [OS=Saccharomyces cerevisiae S288c]                                                             | 854040 | ZEO1; YOL109W   | cell organization and biogenesis                                                                                                      | membrane;mitochondrion                          | protein binding                                                           | 2.981 | 2.162 | 0.73 |
| P00431 | cytochrome c peroxidase, mitochondrial [OS=Saccharomyces cerevisiae S288c]                                   | 853940 | CCP1; YKR066C   | metabolic process;response to stimulus                                                                                                | mitochondrion;organelle lumen                   | antioxidant activity;catalytic activity;metal ion binding;protein binding | 0.557 | 0.425 | 0.76 |
| P38169 | Kynurenine 3-monooxygenase [OS=Saccharomyces cerevisiae S288c]                                               | 852179 | BNA4; YBL098W   | metabolic process                                                                                                                     | membrane;mitochondrion                          | catalytic activity;nucleotide binding                                     | 0.487 | 0.374 | 0.77 |
| P38323 | ATP-dependent clpX-like chaperone, mitochondrial [OS=Saccharomyces cerevisiae S288c]                         | 852528 | MCX1; YBR227C   | metabolic process                                                                                                                     | membrane;mitochondrion;organelle lumen          | catalytic activity;nucleotide binding                                     | 0.403 | 0.311 | 0.77 |
| P53881 | 54S ribosomal protein L22, mitochondrial [OS=Saccharomyces cerevisiae S288c]                                 | 855544 | MRPL22; YNL177C | cell organization and biogenesis;metabolic process                                                                                    | mitochondrion;ribosome                          | RNA binding;structural molecule activity                                  | 0.931 | 0.73  | 0.78 |
| P36516 | 54S ribosomal protein L3, mitochondrial [OS=Saccharomyces cerevisiae S288c]                                  | 855039 | MRPL3; YMR024W  | cell organization and biogenesis;metabolic process;response to stimulus                                                               | mitochondrion;nucleus;ribosome                  | catalytic activity;RNA binding;structural molecule activity               | 0.61  | 0.487 | 0.80 |
| P53166 | ATP-dependent RNA helicase mrh4, mitochondrial [OS=Saccharomyces cerevisiae S288c]                           | 852816 | MRH4; YGL064    | cell organization and biogenesis;metabolic process                                                                                    | mitochondrion;organelle lumen                   | catalytic activity;nucleotide                                             | 0.501 | 0.403 | 0.80 |

|        |                                                                                                             |        |                        |                                                                                     |                                              |                                                                                |        |        |      |
|--------|-------------------------------------------------------------------------------------------------------------|--------|------------------------|-------------------------------------------------------------------------------------|----------------------------------------------|--------------------------------------------------------------------------------|--------|--------|------|
|        | cerevisiae S288c]                                                                                           |        | C                      |                                                                                     |                                              | binding;RNA binding                                                            |        |        |      |
| P36517 | 54S ribosomal protein L4, mitochondrial [OS=Saccharomyces cerevisiae S288c]                                 | 851160 | MRPL4; YLR439W         | cell organization and biogenesis;metabolic process                                  | mitochondrion;ribosome                       | structural molecule activity                                                   | 1.081  | 0.874  | 0.81 |
| P25038 | Translation initiation factor IF-2, mitochondrial [OS=Saccharomyces cerevisiae S288c]                       | 854135 | IFM1; YOL023W          | cell organization and biogenesis;metabolic process                                  | mitochondrion;nucleus                        | catalytic activity;nucleotide binding;RNA binding                              | 0.369  | 0.299  | 0.81 |
| P38088 | Glycine--tRNA ligase 1, mitochondrial [OS=Saccharomyces cerevisiae S288c]                                   |        | GRS1                   | metabolic process                                                                   | cytoplasm;mitochondrion;organelle lumen      | catalytic activity;nucleotide binding;protein binding                          | 0.334  | 0.271  | 0.81 |
| P38297 | Mitofusin FZO1 [OS=Saccharomyces cerevisiae S288c]                                                          | 852477 | FZO1; YBR179C          | cell organization and biogenesis                                                    | membrane;mitochondrion                       | catalytic activity;nucleotide binding;protein binding                          | 0.304  | 0.248  | 0.82 |
| P36520 | 54S ribosomal protein L10, mitochondrial [OS=Saccharomyces cerevisiae S288c]                                | 855436 | MRPL10; YNL284C        | cell organization and biogenesis;metabolic process                                  | mitochondrion;ribosome                       | structural molecule activity                                                   | 1.404  | 1.154  | 0.82 |
| P17558 | 37S ribosomal protein PET123, mitochondrial [OS=Saccharomyces cerevisiae S288c]                             | 854329 | PET123; YOR158W        | cell organization and biogenesis;metabolic process                                  | mitochondrion;ribosome                       | structural molecule activity                                                   | 2.162  | 1.783  | 0.82 |
| Q01163 | 37S ribosomal protein S23, mitochondrial [OS=Saccharomyces cerevisiae S288c]                                | 852748 | RSM23; YGL129C         | cell organization and biogenesis;metabolic process                                  | mitochondrion;ribosome                       | catalytic activity;nucleotide binding;RNA binding;structural molecule activity | 2.065  | 1.707  | 0.83 |
| P28817 | 3-hydroxyisobutyryl-CoA hydrolase, mitochondrial [OS=Saccharomyces cerevisiae S288c]                        | 851606 | EHD3; YDR036C          | metabolic process                                                                   | mitochondrion                                | catalytic activity                                                             | 0.887  | 0.743  | 0.84 |
| Q06567 | ABC1 family protein MCP2 [OS=Saccharomyces cerevisiae S288c]                                                | 850955 | YLR253W; MCP2; YLR253W | cell organization and biogenesis                                                    | membrane;mitochondrion                       |                                                                                | 0.693  | 0.585  | 0.84 |
| P40098 | uncharacterized mitochondrial membrane protein FMP10 [OS=Saccharomyces cerevisiae S288c]                    | 856931 | FMP10; YER182W         |                                                                                     | membrane;mitochondrion                       |                                                                                | 2.793  | 2.36   | 0.84 |
| Q03327 | Mitochondrial fusion and transport protein Ugo1 [OS=Saccharomyces cerevisiae S288c]                         | 852081 | UGO1; YDR470C          | cell organization and biogenesis;metabolic process                                  | membrane;mitochondrion                       | protein binding;structural molecule activity                                   | 1.424  | 1.219  | 0.86 |
| P32332 | Mitochondrial oxaloacetate transport protein [OS=Saccharomyces cerevisiae S288c]                            | 853739 | OAC1; YKL120W          | metabolic process;transport                                                         | membrane;mitochondrion                       | structural molecule activity;transporter activity                              | 5.813  | 4.995  | 0.86 |
| P21801 | Succinate dehydrogenase [ubiquinone] iron-sulfur subunit, mitochondrial [OS=Saccharomyces cerevisiae S288c] | 850685 | SDH2; YLL041C          | metabolic process;transport                                                         | membrane;mitochondrion                       | catalytic activity;metal ion binding                                           | 28.552 | 24.809 | 0.87 |
| P27929 | 37S ribosomal protein NAM9, mitochondrial [OS=Saccharomyces cerevisiae S288c]                               | 855585 | NAM9; YNL137C          | cell organization and biogenesis;metabolic process;regulation of biological process | mitochondrion;ribosome                       | RNA binding;structural molecule activity                                       | 1.865  | 1.683  | 0.90 |
| P15424 | ATP-dependent RNA helicase MSS116, mitochondrial [OS=Saccharomyces cerevisiae S288c]                        | 851775 | MSS116; YDR194C        | metabolic process;regulation of biological process                                  | mitochondrion;organelle lumen                | catalytic activity;nucleotide binding;RNA binding                              | 1.387  | 1.268  | 0.91 |
| Q12031 | Mitochondrial 2-methylisocitrate lyase [OS=Saccharomyces cerevisiae S288c]                                  | 856114 | ICL2; YPR006C          | metabolic process                                                                   | mitochondrion;organelle lumen                | catalytic activity                                                             | 2.793  | 2.793  | 1.00 |
| P43635 | Citrate synthase 3, mitochondrial [OS=Saccharomyces cerevisiae S288c]                                       | 856107 | CIT3; YPR001W          | metabolic process                                                                   | mitochondrion                                | catalytic activity                                                             | 2.914  | 2.914  | 1.00 |
| P25087 | Sterol 24-C-methyltransferase [OS=Saccharomyces cerevisiae S288c]                                           | 855003 | ERG6; YML008C          | metabolic process                                                                   | endoplasmic reticulum;membrane;mitochondrion | catalytic activity                                                             | 1.894  | 1.894  | 1.00 |
| P39952 | Mitochondrial inner membrane protein OXA1 [OS=Saccharomyces cerevisiae S288c]                               | 856898 | OXA1; YER154W          | cell organization and biogenesis;transport                                          | membrane;mitochondrion                       | transporter activity                                                           | 3.87   | 3.87   | 1.00 |
| Q04013 | Citrate/oxoglutarate carrier protein [OS=Saccharomyces cerevisiae S288c]                                    | 855282 | YHM2; YMR241W          | cell organization and biogenesis;metabolic process;transport                        | membrane;mitochondrion                       | DNA binding;structural molecule activity;transporter activity                  | 4.623  | 4.623  | 1.00 |
| P53266 | Cytochrome oxidase assembly protein SHY1 [OS=Saccharomyces cerevisiae S288c]                                | 853009 | SHY1; YGR112W          | cell organization and biogenesis                                                    | membrane;mitochondrion                       | protein binding                                                                | 1.555  | 1.555  | 1.00 |
| Q12029 | Probable mitochondrial transport protein fsf1 [OS=Saccharomyces cerevisiae S288c]                           | 854445 | FSF1; YOR271C          | transport                                                                           | membrane;mitochondrion                       | transporter activity                                                           | 2.36   | 2.36   | 1.00 |
| P53721 | Respiratory supercomplex factor 2, mitochondrial [OS=Saccharomyces cerevisiae S288c]                        | 855752 | RCF2; YNR018W          | cell organization and biogenesis                                                    | membrane;mitochondrion                       |                                                                                | 9      | 9      | 1.00 |
| P38079 | protein YRO2 [OS=Saccharomyces cerevisiae S288c]                                                            | 852343 | YRO2; YBR054W          | transport                                                                           | endoplasmic reticulum;membrane;mitochondrion | transporter activity                                                           | 3.125  | 3.125  | 1.00 |

|        |                                                                                           |         |                        |                                                                                                                    |                                          |                                                                             |       |       |      |
|--------|-------------------------------------------------------------------------------------------|---------|------------------------|--------------------------------------------------------------------------------------------------------------------|------------------------------------------|-----------------------------------------------------------------------------|-------|-------|------|
| Q06668 | Methyltransferase OMS1, mitochondrial [OS=Saccharomyces cerevisiae S288c]                 | 851911  | OMS1; YDR316W          | metabolic process                                                                                                  | membrane;mitochondrion                   | catalytic activity                                                          | 0.484 | 0.484 | 1.00 |
| P00447 | Superoxide dismutase [Mn], mitochondrial [OS=Saccharomyces cerevisiae S288c]              | 856399  | SOD2; YHR008C          | metabolic process;response to stimulus                                                                             | mitochondrion;organelle lumen            | antioxidant activity;catalytic activity;metal ion binding                   | 2.455 | 2.455 | 1.00 |
| P00044 | Cytochrome c iso-1 [OS=Saccharomyces cerevisiae S288c]                                    | 853507  | CYC1; YJR048W          | metabolic process;transport                                                                                        | mitochondrion                            | metal ion binding;protein binding                                           | 3.217 | 3.217 | 1.00 |
| P40508 | Uncharacterized protein YIL077C [OS=Saccharomyces cerevisiae S288c]                       | 854733  | YIL077C; YIL077C       |                                                                                                                    | mitochondrion                            |                                                                             | 0.896 | 0.896 | 1.00 |
| P53969 | Sorting assembly machinery 50 kDa subunit [OS=Saccharomyces cerevisiae S288c]             | 855705  | SAM50; YNL026W         | cell organization and biogenesis;transport                                                                         | membrane;mitochondrion                   | protein binding;transporter activity                                        | 0.487 | 0.487 | 1.00 |
| P32331 | Carrier protein YMC1, mitochondrial [OS=Saccharomyces cerevisiae S288c]                   | 856171  | YMC1; YPR058W          | metabolic process;transport                                                                                        | membrane;mitochondrion;vacuole           | structural molecule activity;transporter activity                           | 1.581 | 1.581 | 1.00 |
| P53230 | Phosphatidate cytidyltransferase, mitochondrial [OS=Saccharomyces cerevisiae S288c]       | 852937  | TAM41; YGR046W         | metabolic process                                                                                                  | membrane;mitochondrion;organelle lumen   | catalytic activity                                                          | 0.668 | 0.668 | 1.00 |
| P00950 | Phosphoglycerate mutase 1 [OS=Saccharomyces cerevisiae S288c]                             | 853705  | GPM1; YKL152C          | metabolic process;regulation of biological process                                                                 | cytoplasm;cytosol;membrane;mitochondrion | catalytic activity                                                          | 1.929 | 1.929 | 1.00 |
| Q06143 | mitochondrial dicarboxylate transporter [OS=Saccharomyces cerevisiae S288c]               | 851063  | DIC1; YLR348C          | metabolic process;transport                                                                                        | membrane;mitochondrion                   | structural molecule activity;transporter activity                           | 0.931 | 0.931 | 1.00 |
| P40416 | Iron-sulfur clusters transporter ATM1, mitochondrial [OS=Saccharomyces cerevisiae S288c]  | 855347  | ATM1; YMR301C          | cellular homeostasis;metabolic process;transport                                                                   | membrane;mitochondrion                   | catalytic activity;nucleotide binding;transporter activity                  | 0.453 | 0.453 | 1.00 |
| P28737 | Protein MSP1 [OS=Saccharomyces cerevisiae S288c]                                          | 852915  | MSP1; YGR028W          | cell organization and biogenesis;metabolic process;regulation of biological process;response to stimulus;transport | membrane;mitochondrion;nucleus           | catalytic activity;nucleotide binding;protein binding;RNA binding           | 0.778 | 0.778 | 1.00 |
| P47039 | Probable kynurenine--oxoglutarate transaminase BNA3 [OS=Saccharomyces cerevisiae S288c]   | 853386  | BNA3; YJL060W          | metabolic process;regulation of biological process                                                                 | cytoplasm;mitochondrion                  | catalytic activity                                                          | 0.468 | 0.468 | 1.00 |
| Q12251 | Uncharacterized mitochondrial carrier YPR011C [OS=Saccharomyces cerevisiae S288c]         | 856121  | YPR011C; YPR011C       | metabolic process;transport                                                                                        | membrane;mitochondrion                   | structural molecule activity;transporter activity                           | 0.73  | 0.73  | 1.00 |
| P32387 | 54S ribosomal protein L41, mitochondrial [OS=Saccharomyces cerevisiae S288c]              | 852014  | MRP20; YDR405W         | cell organization and biogenesis;metabolic process                                                                 | mitochondrion;ribosome                   | nucleotide binding;protein binding;RNA binding;structural molecule activity | 0.501 | 0.501 | 1.00 |
| P36101 | tRNA threonylcarbamoyladenine dehydratase 2 [OS=Saccharomyces cerevisiae S288c]           | 853841  | TCD2; YKL027W; YKL027W | metabolic process                                                                                                  | cytosol;membrane;mitochondrion           | catalytic activity;nucleotide binding                                       | 0.334 | 0.334 | 1.00 |
| P37299 | cytochrome b-c1 complex subunit 10 [OS=Saccharomyces cerevisiae S288c]                    | 856390  | QCR10; YHR001W-A       | metabolic process;transport                                                                                        | membrane;mitochondrion                   | catalytic activity;transporter activity                                     | 2.981 | 2.981 | 1.00 |
| P53889 | uncharacterized mitochondrial hydrolase FMP41 [OS=Saccharomyces cerevisiae S288c]         | 855553  | FMP41; YNL168C         | metabolic process                                                                                                  | mitochondrion                            | catalytic activity;metal ion binding                                        | 0.501 | 0.501 | 1.00 |
| Q04172 | Sensitive to high expression protein 9, mitochondrial [OS=Saccharomyces cerevisiae S288c] | 852002  | SHE9; YDR393W          | cell organization and biogenesis                                                                                   | membrane;mitochondrion                   |                                                                             | 0.269 | 0.269 | 1.00 |
| P21771 | 37S ribosomal protein S28, mitochondrial [OS=Saccharomyces cerevisiae S288c]              | 851937  | MRPS28; YDR337W        | cell organization and biogenesis;metabolic process                                                                 | mitochondrion;ribosome                   | RNA binding;structural molecule activity                                    | 0.624 | 0.624 | 1.00 |
| P50945 | MICOS complex subunit MIC27 [OS=Saccharomyces cerevisiae S288c]                           | 855623  | AIM37; MIC27; YNL100W  | cell organization and biogenesis                                                                                   | membrane;mitochondrion                   |                                                                             | 0.719 | 0.719 | 1.00 |
| P42900 | Sigma-like sequence protein 1, mitochondrial [OS=Saccharomyces cerevisiae S288c]          | 850830  | SLS1; YLR139C          | cell organization and biogenesis;metabolic process                                                                 | membrane;mitochondrion                   | protein binding                                                             | 0.266 | 0.266 | 1.00 |
| Q3E824 | Uncharacterized protein YOR020W-A [OS=Saccharomyces cerevisiae S288c]                     | 1466480 | YOR020W-A; YOR020W-A   | metabolic process;transport                                                                                        | membrane;mitochondrion                   |                                                                             | 2.162 | 2.162 | 1.00 |
| P36521 | 54S ribosomal protein L11, mitochondrial [OS=Saccharomyces cerevisiae S288c]              | 851325  | MRPL11; YDL202W        | cell organization and biogenesis;metabolic process                                                                 | mitochondrion;ribosome                   | structural molecule activity                                                | 0.833 | 0.833 | 1.00 |

|          |                                                                                                  |        |                        |                                                                                                        |                                              |                                                                   |       |       |      |
|----------|--------------------------------------------------------------------------------------------------|--------|------------------------|--------------------------------------------------------------------------------------------------------|----------------------------------------------|-------------------------------------------------------------------|-------|-------|------|
| P18496   | Mitochondrial ATPase complex subunit ATP10 [OS=Saccharomyces cerevisiae S288c]                   | 851109 | ATP10; YLR393W         | cell organization and biogenesis                                                                       | cytoplasm;membrane;mitochondrion             | protein binding                                                   | 0.585 | 0.585 | 1.00 |
| Q06698   | Putative ATP-dependent RNA helicase YLR419W [OS=Saccharomyces cerevisiae S288c]                  | 851137 | YLR419W; YLR419W       | metabolic process                                                                                      | cytoplasm;mitochondrion;nucleus              | catalytic activity;nucleotide binding;protein binding;RNA binding | 0.11  | 0.11  | 1.00 |
| Q12467   | MIOREX complex component 4 [OS=Saccharomyces cerevisiae S288c]                                   | 855935 | YPL168W; MRX4; YPL168W |                                                                                                        | membrane;mitochondrion                       |                                                                   | 0.318 | 0.318 | 1.00 |
| P32839   | Mitochondrial chaperone BCS1 [OS=Saccharomyces cerevisiae S288c]                                 | 851981 | BCS1; YDR375C          | cell organization and biogenesis;metabolic process;response to stimulus;transport                      | cytosol;membrane;mitochondrion               | catalytic activity;nucleotide binding;transporter activity        | 0.194 | 0.194 | 1.00 |
| P32904   | 54S ribosomal protein L6, mitochondrial [OS=Saccharomyces cerevisiae S288c]                      | 856552 | MRPL6; YHR147C         | cell organization and biogenesis;metabolic process                                                     | mitochondrion;ribosome                       | RNA binding;structural molecule activity                          | 1.054 | 1.054 | 1.00 |
| P10834   | protein PET54 [OS=Saccharomyces cerevisiae S288c]                                                | 853137 | PET54; YGR222W         | metabolic process;regulation of biological process                                                     | membrane;mitochondrion;organelle lumen       | nucleotide binding;RNA binding;translation regulator activity     | 0.369 | 0.369 | 1.00 |
| Q12375   | mitochondrial ornithine transporter 1 [OS=Saccharomyces cerevisiae S288c]                        | 854297 | ORT1; YOR130C          | metabolic process;transport                                                                            | membrane;mitochondrion                       | structural molecule activity;transporter activity                 | 0.54  | 0.54  | 1.00 |
| Q01532-1 | Cysteine proteinase 1, mitochondrial [OS=Saccharomyces cerevisiae S288c]                         |        |                        | metabolic process;regulation of biological process;response to stimulus                                | cytoplasm;mitochondrion                      | catalytic activity;DNA binding;RNA binding                        | 0.179 | 0.179 | 1.00 |
| P39677   | Ribosome-releasing factor 2, mitochondrial [OS=Saccharomyces cerevisiae S288c]                   | 853342 | MEF2; YJL102W          | cell organization and biogenesis;metabolic process                                                     | cytosol;mitochondrion                        | catalytic activity;nucleotide binding;RNA binding                 | 0.116 | 0.116 | 1.00 |
| P33759   | 37S ribosomal protein S5, mitochondrial [OS=Saccharomyces cerevisiae S288c]                      | 852553 | MRP55; YBR251W         | cell organization and biogenesis;metabolic process                                                     | mitochondrion;ribosome                       | RNA binding;structural molecule activity                          | 0.413 | 0.413 | 1.00 |
| P41911   | Glycerol-3-phosphate dehydrogenase [NAD(+)] 2, mitochondrial [OS=Saccharomyces cerevisiae S288c] | 854095 | GPD2; YOL059W          | metabolic process                                                                                      | cytoplasm;cytosol;mitochondrion              | catalytic activity;nucleotide binding;protein binding             | 0.186 | 0.186 | 1.00 |
| P40496   | 37S ribosomal protein S25, mitochondrial [OS=Saccharomyces cerevisiae S288c]                     | 854715 | RSM25; YIL093C         | cell organization and biogenesis;metabolic process                                                     | mitochondrion;ribosome                       | structural molecule activity                                      | 0.668 | 0.668 | 1.00 |
| P10849   | mitochondrial transcription factor 2 [OS=Saccharomyces cerevisiae S288c]                         | 851517 | MTF2; YDL044C          | metabolic process                                                                                      | mitochondrion;organelle lumen                | protein binding;RNA binding                                       | 0.166 | 0.166 | 1.00 |
| P40015   | inositol phosphosphingolipids phospholipase C [OS=Saccharomyces cerevisiae S288c]                | 856739 | ISC1; YER019W          | metabolic process;response to stimulus                                                                 | endoplasmic reticulum;membrane;mitochondrion | catalytic activity;metal ion binding                              | 0.334 | 0.334 | 1.00 |
| P48237   | Mitochondrial group I intron splicing factor CCM1 [OS=Saccharomyces cerevisiae S288c]            | 853053 | CCM1; YGR150C          | cell organization and biogenesis;metabolic process                                                     | mitochondrion                                | RNA binding                                                       | 0.089 | 0.089 | 1.00 |
| P48525   | Glutamate-tRNA ligase, mitochondrial [OS=Saccharomyces cerevisiae S288c]                         | 854124 | MSE1; YOL033W          | cell organization and biogenesis;metabolic process                                                     | cytoplasm;mitochondrion;organelle lumen      | catalytic activity;nucleotide binding;RNA binding                 | 0.145 | 0.145 | 1.00 |
| P40159   | Uncharacterized protein YNL208W [OS=Saccharomyces cerevisiae S288c]                              | 855513 | YNL208W; YNL208W       |                                                                                                        | membrane;mitochondrion;ribosome              |                                                                   | 0.292 | 0.292 | 1.00 |
| P53219   | Abhydrolase domain-containing protein IMO32 [OS=Saccharomyces cerevisiae S288c]                  | 852919 | IMO32; YGR031W         | metabolic process;transport                                                                            | mitochondrion                                | catalytic activity                                                | 0.245 | 0.245 | 1.00 |
| P18409   | Mitochondrial distribution and morphology protein 10 [OS=Saccharomyces cerevisiae S288c]         | 851223 | MDM10; YAL010C         | cell organization and biogenesis;transport                                                             | membrane;mitochondrion                       | protein binding                                                   | 0.16  | 0.16  | 1.00 |
| P36519   | 54S ribosomal protein L7, mitochondrial [OS=Saccharomyces cerevisiae S288c]                      | 851823 | MRPL7; YDR237W         | cell organization and biogenesis;metabolic process                                                     | mitochondrion;ribosome                       | RNA binding;structural molecule activity                          | 0.136 | 0.136 | 1.00 |
| Q07821   | Iron-sulfur assembly protein 1 [OS=Saccharomyces cerevisiae S288c]                               | 850632 | ISA1; YLL027W          | cell organization and biogenesis;metabolic process                                                     | mitochondrion;organelle lumen                | metal ion binding;structural molecule activity                    | 0.136 | 0.136 | 1.00 |
| Q05779   | Ubiquinone biosynthesis protein COQ9, mitochondrial [OS=Saccharomyces cerevisiae S288c]          | 850898 | COQ9; YLR201C          | metabolic process                                                                                      | membrane;mitochondrion                       |                                                                   | 0.166 | 0.166 | 1.00 |
| P25372   | Thioredoxin-3, mitochondrial [OS=Saccharomyces cerevisiae S288c]                                 | 850444 | TRX3; YCR083W          | cellular homeostasis;metabolic process;regulation of biological process;response to stimulus;transport | cytoplasm;mitochondrion                      | catalytic activity                                                | 0.52  | 0.52  | 1.00 |
| Q12233   | ATP synthase subunit g, mitochondrial [OS=Saccharomyces cerevisiae S288c]                        | 856131 | ATP20; YPRO20W         | cell organization and biogenesis;metabolic process;transport                                           | membrane;mitochondrion                       | catalytic activity;transporter activity                           | 0.778 | 0.778 | 1.00 |
| P21306   | ATP synthase subunit epsilon, mitochondrial [OS=Saccharomyces cerevisiae S288c]                  | 855857 | ATP15; YPL271W         | metabolic process;transport                                                                            | membrane;mitochondrion                       | catalytic activity;transporter activity                           | 0.778 | 0.778 | 1.00 |

|        |                                                                                                   |         |                      |                                                                                              |                                              |                                                             |       |       |      |
|--------|---------------------------------------------------------------------------------------------------|---------|----------------------|----------------------------------------------------------------------------------------------|----------------------------------------------|-------------------------------------------------------------|-------|-------|------|
| P19516 | Cytochrome c oxidase assembly protein COX11, mitochondrial [OS=Saccharomyces cerevisiae S288c]    | 855971  | COX11; YPL132W       | cell organization and biogenesis;metabolic process                                           | membrane;mitochondrion;ribosome              | metal ion binding                                           | 0.274 | 0.274 | 1.00 |
| Q06236 | Mitochondrial inner membrane protein SHH4 [OS=Saccharomyces cerevisiae S288c]                     | 850861  | SHH4; YLR164W        | metabolic process                                                                            | membrane;mitochondrion                       | catalytic activity;metal ion binding                        | 0.778 | 0.778 | 1.00 |
| P39515 | mitochondrial import inner membrane translocase subunit Tim17 [OS=Saccharomyces cerevisiae S288c] | 853298  | TIM17; YJL143W       | cell organization and biogenesis;transport                                                   | membrane;mitochondrion                       | protein binding;transporter activity                        | 0.778 | 0.778 | 1.00 |
| P03875 | Putative COX1/OX13 intron 1 protein [OS=Saccharomyces cerevisiae S288c]                           | 854593  | AI1; Q0050           | metabolic process;transport                                                                  | mitochondrion                                | catalytic activity;metal ion binding;transporter activity   | 0.081 | 0.081 | 1.00 |
| P36523 | 54S ribosomal protein L15, mitochondrial [OS=Saccharomyces cerevisiae S288c]                      | 851022  | MRPL15; YLR312W-A    | cell organization and biogenesis;metabolic process                                           | mitochondrion;ribosome                       | catalytic activity;RNA binding;structural molecule activity | 0.155 | 0.155 | 1.00 |
| P38909 | cytochrome c mitochondrial import factor CYC2 [OS=Saccharomyces cerevisiae S288c]                 | 854202  | CYC2; YOR037W        | cell organization and biogenesis;metabolic process                                           | membrane;mitochondrion                       | catalytic activity                                          | 0.194 | 0.194 | 1.00 |
| P08525 | Cytochrome b-c1 complex subunit 8 [OS=Saccharomyces cerevisiae S288c]                             | 853273  | QCR8; YJL166W        | metabolic process;transport                                                                  | membrane;mitochondrion                       | catalytic activity;transporter activity                     | 0.585 | 0.585 | 1.00 |
| P32463 | Acyl carrier protein, mitochondrial [OS=Saccharomyces cerevisiae S288c]                           | 853642  | ACP1; YKL192C        | metabolic process;transport                                                                  | mitochondrion                                |                                                             | 0.259 | 0.259 | 1.00 |
| P25270 | rRNA methyltransferase 1, mitochondrial [OS=Saccharomyces cerevisiae S288c]                       | 854376  | MRM1; YOR201C        | metabolic process                                                                            | mitochondrion                                | catalytic activity;RNA binding                              | 0.274 | 0.274 | 1.00 |
| P81451 | ATP synthase subunit K, mitochondrial [OS=Saccharomyces cerevisiae S288c]                         | 854077  | ATP19; YOL077W-A     | cell organization and biogenesis;metabolic process;transport                                 | membrane;mitochondrion                       | catalytic activity;transporter activity                     | 1.154 | 1.154 | 1.00 |
| P53305 | Mitochondrial 37S ribosomal protein S27 [OS=Saccharomyces cerevisiae S288c]                       | 853129  | RSM27; YGR215W       | cell organization and biogenesis;metabolic process                                           | mitochondrion;ribosome                       | structural molecule activity                                | 0.468 | 0.468 | 1.00 |
| P36531 | 54S ribosomal protein L36, mitochondrial [OS=Saccharomyces cerevisiae S288c]                      | 852419  | MRPL36; YBR122C      | cell organization and biogenesis;metabolic process                                           | mitochondrion;ribosome                       | structural molecule activity                                | 0.292 | 0.292 | 1.00 |
| P32493 | ATPase expression protein 1, mitochondrial [OS=Saccharomyces cerevisiae S288c]                    | 855086  | AEP1; YMR064W        | regulation of biological process                                                             | mitochondrion                                | translation regulator activity                              | 0.15  | 0.15  | 1.00 |
| P22354 | 54S ribosomal protein L20, mitochondrial [OS=Saccharomyces cerevisiae S288c]                      | 853960  | MRPL20; YKR085C      | cell organization and biogenesis;metabolic process                                           | mitochondrion;ribosome                       | structural molecule activity                                | 0.389 | 0.389 | 1.00 |
| Q2V2P9 | Uncharacterized protein YDR119W-A [OS=Saccharomyces cerevisiae S288c]                             | 3799970 | COX26; YDR119W-A     |                                                                                              | membrane;mitochondrion                       |                                                             | 1.154 | 1.154 | 1.00 |
| P03879 | Intron-encoded RNA maturase bI4 [OS=Saccharomyces cerevisiae S288c]                               | 854582  | BI4; Q0120           | metabolic process                                                                            | membrane;mitochondrion                       | catalytic activity;RNA binding                              | 0.179 | 0.179 | 1.00 |
| P38341 | MICOS complex subunit MIC12 [OS=Saccharomyces cerevisiae S288c]                                   | 852566  | AIM5; MIC12; YBR262C | cell organization and biogenesis                                                             | membrane;mitochondrion                       |                                                             | 0.292 | 0.292 | 1.00 |
| P38816 | thioredoxin reductase 2, mitochondrial [OS=Saccharomyces cerevisiae S288c]                        | 856506  | TRR2; YHR106W        | cellular homeostasis;metabolic process;regulation of biological process;response to stimulus | cytoplasm;mitochondrion                      | antioxidant activity;catalytic activity                     | 0.136 | 0.136 | 1.00 |
| Q03218 | Mitochondrial metal transporter 1 [OS=Saccharomyces cerevisiae S288c]                             | 855215  | MMT1; YMR177W        | cellular homeostasis;regulation of biological process;response to stimulus;transport         | membrane;mitochondrion                       | transporter activity                                        | 0.096 | 0.096 | 1.00 |
| P04039 | Cytochrome c oxidase polypeptide VIII, mitochondrial [OS=Saccharomyces cerevisiae S288c]          | 851111  | COX8; YLR395C        | metabolic process;transport                                                                  | membrane;mitochondrion                       | catalytic activity;transporter activity                     | 0.778 | 0.778 | 1.00 |
| Q04748 | Protein SOV1, mitochondrial [OS=Saccharomyces cerevisiae S288c]                                   | 855088  | SOV1; YMR066W        |                                                                                              | mitochondrion                                |                                                             | 0.041 | 0.041 | 1.00 |
| Q04487 | Mitochondrial inner membrane protein SHH3 [OS=Saccharomyces cerevisiae S288c]                     | 855145  | SHH3; YMR118C        | metabolic process                                                                            | membrane;mitochondrion                       | catalytic activity;metal ion binding                        | 0.194 | 0.194 | 1.00 |
| P40858 | 54S ribosomal protein L49, mitochondrial [OS=Saccharomyces cerevisiae S288c]                      | 853349  | MRPL49; YJL096W      | cell organization and biogenesis;metabolic process                                           | mitochondrion;ribosome                       | RNA binding;structural molecule activity                    | 0.212 | 0.212 | 1.00 |
| P10174 | cytochrome c oxidase subunit 7 [OS=Saccharomyces cerevisiae S288c]                                | 855298  | COX7; YMR256C        | metabolic process;transport                                                                  | membrane;mitochondrion                       | catalytic activity;transporter activity                     | 1.154 | 1.154 | 1.00 |
| Q03640 | Tricalbin-3 [OS=Saccharomyces cerevisiae S288c]                                                   | 854903  | TCB3; YML072C        | cell organization and biogenesis;regulation of biological process                            | endoplasmic reticulum;membrane;mitochondrion | metal ion binding;protein binding                           | 0.806 | 0.863 | 1.07 |
| P00560 | Phosphoglycerate kinase [OS=Saccharomyces cerevisiae S288c]                                       | 850370  | PGK1; YCR012W        | metabolic process                                                                            | cytoplasm;membrane;mitochondrion             | catalytic activity;nucleotide binding                       | 2.981 | 3.299 | 1.11 |
| P07806 | Valine--tRNA ligase, mitochondrial [OS=Saccharomyces cerevisiae S288c]                            | 852986  | VAS1; YGR094W        | metabolic process;regulation of biological process                                           | cytoplasm;cytosol;mitochondrion              | catalytic activity;nucleotide binding                       | 0.422 | 0.468 | 1.11 |

|        |                                                                                                   |            |                                      |                                                              |                                                       |                                                       |       |       |      |
|--------|---------------------------------------------------------------------------------------------------|------------|--------------------------------------|--------------------------------------------------------------|-------------------------------------------------------|-------------------------------------------------------|-------|-------|------|
| P32191 | Glycerol-3-phosphate dehydrogenase, mitochondrial [OS=Saccharomyces cerevisiae S288c]             | 85465<br>1 | GUT2;<br>YIL155<br>C                 | metabolic process                                            | membrane;mitochondrion                                | catalytic activity                                    | 4.555 | 5.127 | 1.13 |
| Q07349 | MIOREX complex component 9 [OS=Saccharomyces cerevisiae S288c]                                    | 85153<br>5 | YDL027<br>C;<br>MRX9;<br>YDL027<br>C |                                                              | endoplasmic reticulum;membrane;mitochondrion          |                                                       | 1.913 | 2.162 | 1.13 |
| P22136 | ATPase expression protein 2, mitochondrial [OS=Saccharomyces cerevisiae S288c]                    | 85532<br>5 | AEP2;<br>YMR28<br>2C                 | metabolic process;regulation of biological process           | mitochondrion                                         | RNA binding                                           | 0.668 | 0.756 | 1.13 |
| Q08023 | Protein FMP25, mitochondrial [OS=Saccharomyces cerevisiae S288c]                                  | 85076<br>6 | FMP25;<br>YLR077<br>W                | cell organization and biogenesis                             | membrane;mitochondrion                                |                                                       | 1.106 | 1.254 | 1.13 |
| P39518 | Long-chain-fatty-acid--CoA ligase 2 [OS=Saccharomyces cerevisiae S288c]                           | 85673<br>4 | FAA2;<br>YER015<br>W                 | metabolic process;transport                                  | cytoplasm;mitochondrion                               | catalytic activity;nucleotide binding                 | 0.619 | 0.708 | 1.14 |
| P53292 | 37S ribosomal protein S35, mitochondrial [OS=Saccharomyces cerevisiae S288c]                      | 85307<br>5 | MRPS3<br>5;<br>YGR16<br>5W           | cell organization and biogenesis;metabolic process           | mitochondrion;ribosome                                | structural molecule activity                          | 2.02  | 2.311 | 1.14 |
| Q12482 | Mitochondrial aspartate-glutamate transporter AGC1 [OS=Saccharomyces cerevisiae S288c]            | 85613<br>2 | AGC1;<br>YPR021<br>C                 | metabolic process;transport                                  | membrane;mitochondrion                                | structural molecule activity;transporter activity     | 0.407 | 0.468 | 1.15 |
| P46681 | D-lactate dehydrogenase [cytochrome] 2, mitochondrial [OS=Saccharomyces cerevisiae S288c]         | 85137<br>6 | DLD2;<br>YDL178<br>W                 | metabolic process                                            | mitochondrion;organelle lumen                         | catalytic activity;nucleotide binding;protein binding | 0.951 | 1.102 | 1.16 |
| P40086 | Cytochrome c oxidase assembly protein cox15 [OS=Saccharomyces cerevisiae S288c]                   | 85688<br>4 | COX15;<br>YER141<br>W                | cell organization and biogenesis;metabolic process;transport | membrane;mitochondrion                                | catalytic activity;transporter activity               | 1.154 | 1.346 | 1.17 |
| P43616 | Cys-Gly metallopeptidase dug1 [OS=Saccharomyces cerevisiae S288c]                                 | 85060<br>5 | DUG1;<br>YFR044<br>C                 | metabolic process                                            | cytoplasm;mitochondrion;ribosome                      | catalytic activity;metal ion binding                  | 0.848 | 0.995 | 1.17 |
| P15179 | Aspartate--tRNA ligase, mitochondrial [OS=Saccharomyces cerevisiae S288c]                         | 85600<br>0 | MSD1;<br>YPL104<br>W                 | metabolic process                                            | cytoplasm;mitochondrion;organelle lumen               | catalytic activity;nucleotide binding                 | 0.379 | 0.455 | 1.20 |
| P11914 | Mitochondrial-processing peptidase subunit alpha [OS=Saccharomyces cerevisiae S288c]              | 85641<br>9 | MAS2;<br>YHR02<br>4C                 | metabolic process;transport                                  | membrane;mitochondrion;organelle lumen                | catalytic activity;metal ion binding;protein binding  | 0.905 | 1.089 | 1.20 |
| P38626 | NADH-cytochrome b5 reductase 1 [OS=Saccharomyces cerevisiae S288c]                                | 85476<br>8 | CBR1;<br>YIL043<br>C                 | metabolic process                                            | endoplasmic reticulum;membrane;mitochondrion;nucl eus | catalytic activity                                    | 0.957 | 1.154 | 1.21 |
| Q08968 | UPF0061 protein FMP40 [OS=Saccharomyces cerevisiae S288c]                                         | 85587<br>9 | FMP40;<br>YPL222<br>W                |                                                              | mitochondrion                                         | protein binding                                       | 1.015 | 1.228 | 1.21 |
| P47045 | mitochondrial import inner membrane translocase subunit TIM54 [OS=Saccharomyces cerevisiae S288c] | 85339<br>2 | TIM54;<br>YJL054<br>W                | cell organization and biogenesis;transport                   | cytosol;membrane;mitochondrion                        | transporter activity                                  | 0.54  | 0.655 | 1.21 |
| P38969 | Pentamidine resistance factor, mitochondrial [OS=Saccharomyces cerevisiae S288c]                  | 85444<br>0 | PNT1;<br>YOR26<br>6W                 | cell organization and biogenesis;response to stimulus        | membrane;mitochondrion                                |                                                       | 0.585 | 0.711 | 1.22 |
| P40012 | protoporphyrinogen oxidase [OS=Saccharomyces cerevisiae S288c]                                    | 85673<br>3 | HEM14<br>;<br>YER014<br>W            | metabolic process                                            | membrane;mitochondrion                                | catalytic activity                                    | 1.336 | 1.637 | 1.23 |
| Q03976 | 37S ribosomal protein S24, mitochondrial [OS=Saccharomyces cerevisiae S288c]                      | 85175<br>5 | RSM24;<br>YDR17<br>5C                | cell organization and biogenesis;metabolic process           | mitochondrion;ribosome                                | structural molecule activity                          | 0.738 | 0.905 | 1.23 |
| P40047 | Aldehyde dehydrogenase 5, mitochondrial [OS=Saccharomyces cerevisiae S288c]                       | 85680<br>4 | ALD5;<br>YER073<br>W                 | metabolic process                                            | mitochondrion;organelle lumen                         | catalytic activity                                    | 1.762 | 2.162 | 1.23 |
| Q12117 | Protein MRH1 [OS=Saccharomyces cerevisiae S288c]                                                  | 85159<br>7 | MRH1;<br>YDR03<br>3W                 | transport                                                    | endoplasmic reticulum;membrane;mitochondrion          | transporter activity                                  | 7.254 | 9     | 1.24 |
| P48527 | Tyrosine--tRNA ligase, mitochondrial [OS=Saccharomyces cerevisiae S288c]                          | 85600<br>7 | MSY1;<br>YPL097<br>W                 | metabolic process                                            | cytoplasm;cytosol;mitochondrion;organel le lumen      | catalytic activity;nucleotide binding;RNA binding     | 0.417 | 0.52  | 1.25 |
| P36066 | Protein MRG3-like [OS=Saccharomyces cerevisiae S288c]                                             | 85372<br>5 | YKL133<br>C;<br>YKL133<br>C          | metabolic process                                            | membrane;mitochondrion                                | protein binding                                       | 0.433 | 0.54  | 1.25 |
| P21375 | Fumarate reductase 2 [OS=Saccharomyces cerevisiae S288c]                                          | 85351<br>0 | OSM1;<br>YJR051<br>W                 | metabolic process                                            | endoplasmic reticulum;mitochondrion                   | catalytic activity;nucleotide binding                 | 0.45  | 0.562 | 1.25 |
| P09440 | C-1-tetrahydrofolate synthase, mitochondrial [OS=Saccharomyces cerevisiae S288c]                  | 85237<br>8 | MIS1;<br>YBR084<br>W                 | metabolic process                                            | cytosol;mitochondrion                                 | catalytic activity;nucleotide binding                 | 0.9   | 1.127 | 1.25 |
| P39006 | Phosphatidylserine decarboxylase proenzyme 1, mitochondrial [OS=Saccharomyces cerevisiae S288c]   | 85555<br>2 | PSD1;<br>YNL169<br>C                 | metabolic process;regulation of biological process           | membrane;mitochondrion                                | catalytic activity                                    | 0.487 | 0.61  | 1.25 |
| P32611 | 54S ribosomal protein RML2, mitochondrial [OS=Saccharomyces cerevisiae S288c]                     | 85666<br>0 | RML2;<br>YEL050<br>C                 | cell organization and biogenesis;metabolic process           | mitochondrion;ribosome                                | catalytic activity;RNA binding;structural             | 0.509 | 0.638 | 1.25 |



|        |                                                                                                |        |                  |                                                                                     |                                                                |                                                                                     |       |        |      |
|--------|------------------------------------------------------------------------------------------------|--------|------------------|-------------------------------------------------------------------------------------|----------------------------------------------------------------|-------------------------------------------------------------------------------------|-------|--------|------|
|        |                                                                                                |        |                  |                                                                                     |                                                                | molecule activity                                                                   |       |        |      |
| P10507 | mitochondrial-processing peptidase subunit beta [OS=Saccharomyces cerevisiae S288c]            | 850860 | MAS1; YLR163C    | metabolic process;transport                                                         | mitochondrion;organelle lumen                                  | catalytic activity;metal ion binding;protein binding                                | 0.616 | 0.778  | 1.26 |
| P48526 | Isoleucine--tRNA ligase, mitochondrial [OS=Saccharomyces cerevisiae S288c]                     | 856067 | ISM1; YPL040C    | cell organization and biogenesis;metabolic process;regulation of biological process | cytoplasm;cytosol;mitochondrion;organelle lumen                | catalytic activity;nucleotide binding                                               | 0.169 | 0.215  | 1.27 |
| P51998 | 54S ribosomal protein yml6, mitochondrial [OS=Saccharomyces cerevisiae S288c]                  | 854983 | YML6; YML025C    | cell organization and biogenesis;metabolic process                                  | mitochondrion;ribosome                                         | RNA binding;structural molecule activity                                            | 0.73  | 0.931  | 1.28 |
| P32453 | Protein ATP11, mitochondrial [OS=Saccharomyces cerevisiae S288c]                               | 855401 | ATP11; YNL315C   | cell organization and biogenesis                                                    | mitochondrion                                                  | protein binding                                                                     | 0.778 | 0.995  | 1.28 |
| P49095 | Glycine dehydrogenase (Decarboxylating), mitochondrial [OS=Saccharomyces cerevisiae S288c]     | 855227 | GCV2; YMR189W    | metabolic process                                                                   | cytosol;mitochondrion                                          | catalytic activity                                                                  | 1.683 | 2.162  | 1.28 |
| P28241 | Isocitrate dehydrogenase [NAD] subunit 2, mitochondrial [OS=Saccharomyces cerevisiae S288c]    | 854303 | IDH2; YOR136W    | metabolic process                                                                   | mitochondrion;organelle lumen                                  | catalytic activity;metal ion binding;nucleotide binding;protein binding;RNA binding | 5.449 | 7.031  | 1.29 |
| P38771 | Ribosome-recycling factor, mitochondrial [OS=Saccharomyces cerevisiae S288c]                   | 856433 | RRF1; YHR038W    | cell organization and biogenesis;metabolic process                                  | mitochondrion                                                  | RNA binding                                                                         | 0.968 | 1.254  | 1.30 |
| P48360 | Probable NADPH:adrenodoxin oxidoreductase, mitochondrial [OS=Saccharomyces cerevisiae S288c]   | 851982 | ARH1; YDR376W    | cellular homeostasis;metabolic process;transport                                    | cytoplasm;membrane;mitochondrion;organelle lumen               | catalytic activity                                                                  | 0.346 | 0.45   | 1.30 |
| P28834 | Isocitrate dehydrogenase [NAD] subunit 1, mitochondrial [OS=Saccharomyces cerevisiae S288c]    | 855691 | IDH1; YNL037C    | metabolic process;transport                                                         | cytosol;mitochondrion;organelle lumen                          | catalytic activity;metal ion binding;nucleotide binding;protein binding;RNA binding | 9     | 11.743 | 1.30 |
| P04710 | ADP,ATP carrier protein 1 [OS=Saccharomyces cerevisiae S288c]                                  | 855078 | AAC1; YMR056C    | metabolic process;transport                                                         | cytosol;membrane;mitochondrion                                 | structural molecule activity;transporter activity                                   | 6.848 | 9      | 1.31 |
| P39676 | Flavohepomeprotein [OS=Saccharomyces cerevisiae S288c]                                         | 853149 | YHB1; YGR234W    | metabolic process;response to stimulus                                              | cytoplasm;cytosol;mitochondrion;organelle lumen                | catalytic activity;metal ion binding;protein binding                                | 0.551 | 0.73   | 1.32 |
| P37293 | N-terminal acetyltransferase 2 [OS=Saccharomyces cerevisiae S288c]                             | 853050 | NAT2; YGR147C    | metabolic process                                                                   | cytoplasm;mitochondrion                                        | catalytic activity                                                                  | 0.551 | 0.73   | 1.32 |
| P38072 | Protein SCO2, mitochondrial [OS=Saccharomyces cerevisiae S288c]                                | 852312 | SCO2; YBR024W    | cell organization and biogenesis;cellular homeostasis;metabolic process;transport   | membrane;mitochondrion                                         | antioxidant activity;catalytic activity;metal ion binding                           | 0.551 | 0.73   | 1.32 |
| P50110 | Sorting assembly machinery 37 kDa subunit [OS=Saccharomyces cerevisiae S288c]                  | 855082 | SAM37 ; YMR060C  | cell organization and biogenesis;transport                                          | membrane;mitochondrion                                         | protein binding                                                                     | 0.551 | 0.73   | 1.32 |
| P09457 | ATP synthase subunit 5, mitochondrial [OS=Saccharomyces cerevisiae S288c]                      | 851892 | ATP5; YDR298C    | metabolic process;transport                                                         | membrane;mitochondrion                                         | catalytic activity;transporter activity                                             | 7.799 | 10.365 | 1.33 |
| Q02981 | ABC1 family protein YPL109C, mitochondrial [OS=Saccharomyces cerevisiae S288c]                 | 855995 | YPL109C; YPL109C |                                                                                     | mitochondrion                                                  |                                                                                     | 0.585 | 0.778  | 1.33 |
| P40471 | NADPH-dependent 1-acyldihydroxyacetone phosphate reductase [OS=Saccharomyces cerevisiae S288c] | 854682 | AYR1; YIL124W    | metabolic process                                                                   | cytoplasm;endoplasmic reticulum;membrane;mitochondrion         | catalytic activity                                                                  | 0.585 | 0.778  | 1.33 |
| P32335 | Protein MSS51, mitochondrial [OS=Saccharomyces cerevisiae S288c]                               | 850900 | MSS51; YLR203C   | metabolic process;regulation of biological process                                  | membrane;mitochondrion                                         | protein binding;translation regulator activity                                      | 0.995 | 1.326  | 1.33 |
| P16603 | NADPH--cytochrome P450 reductase [OS=Saccharomyces cerevisiae S288c]                           | 856438 | NCP1; YHR042W    | metabolic process                                                                   | cytoplasm;cytosol;endoplasmic reticulum;membrane;mitochondrion | catalytic activity;metal ion binding;nucleotide binding                             | 0.604 | 0.805  | 1.33 |
| Q03028 | Mitochondrial 2-oxodicarboxylate carrier 1 [OS=Saccharomyces cerevisiae S288c]                 | 855969 | ODC1; YPL134C    | metabolic process;transport                                                         | membrane;mitochondrion                                         | structural molecule activity;transporter activity                                   | 5.813 | 7.799  | 1.34 |
| P53206 | putative cysteine synthase [OS=Saccharomyces cerevisiae S288c]                                 | 852895 | YGR012W; YGR012W | metabolic process                                                                   | mitochondrion                                                  | catalytic activity                                                                  | 1.154 | 1.555  | 1.35 |
| P33311 | ATP-dependent permease MDL2, mitochondrial [OS=Saccharomyces cerevisiae S288c]                 | 855858 | MDL2; YPL270W    | response to stimulus;transport                                                      | membrane;mitochondrion                                         | catalytic activity;nucleotide binding;transporter activity                          | 0.901 | 1.233  | 1.37 |
| P00175 | Cytochrome b2, mitochondrial [OS=Saccharomyces cerevisiae S288c]                               | 854950 | CYB2; YML05      | metabolic process;transport                                                         | cytosol;membrane;mitochondrion;nucleus                         | catalytic activity;metal ion                                                        | 0.189 | 0.259  | 1.37 |

|        |                                                                                                                      |        |                      |                                                                         |                                                        |                                                                     |        |        |      |
|--------|----------------------------------------------------------------------------------------------------------------------|--------|----------------------|-------------------------------------------------------------------------|--------------------------------------------------------|---------------------------------------------------------------------|--------|--------|------|
|        | S288c]                                                                                                               |        | 4C                   |                                                                         |                                                        | binding;nucleotide binding                                          |        |        |      |
| P40582 | Glutathione S-transferase 1 [OS=Saccharomyces cerevisiae S288c]                                                      | 854856 | GTT1; YIR038C        | metabolic process                                                       | endoplasmic reticulum;membrane;mitochondrion;nucl      | antioxidant activity;catalytic activity;protein binding;RNA binding | 0.931  | 1.276  | 1.37 |
| P50087 | MICOS subunit MIC26 [OS=Saccharomyces cerevisiae S288c]                                                              | 853150 | MOS2; MIC26; YGR235C | cell organization and biogenesis                                        | membrane;mitochondrion                                 |                                                                     | 0.931  | 1.276  | 1.37 |
| P33310 | ATP-dependent permease MDL1, mitochondrial [OS=Saccharomyces cerevisiae S288c]                                       | 850885 | MDL1; YLR188W        | transport                                                               | membrane;mitochondrion                                 | catalytic activity;nucleotide binding;transporter activity          | 0.528  | 0.725  | 1.37 |
| P00360 | glyceraldehyde-3-phosphate dehydrogenase 1 [OS=Saccharomyces cerevisiae S288c]                                       | 853395 | TDH1; YJL052W        | metabolic process                                                       | cytoplasm;cytosol;membrane;mitochondrion               | catalytic activity;nucleotide binding                               | 1.462  | 2.008  | 1.37 |
| P25374 | Cysteine desulfurase, mitochondrial [OS=Saccharomyces cerevisiae S288c]                                              | 850343 | NFS1; YCL017C        | cell organization and biogenesis;cellular homeostasis;metabolic process | mitochondrion;nucleus                                  | catalytic activity;metal ion binding;protein binding                | 0.978  | 1.346  | 1.38 |
| Q12374 | Nuclear control of ATPase protein 2 [OS=Saccharomyces cerevisiae S288c]                                              | 856278 | NCA2; YPR155C        | metabolic process                                                       | membrane;mitochondrion                                 |                                                                     | 0.565  | 0.778  | 1.38 |
| P53312 | Succinyl-CoA ligase [ADP-forming] subunit beta, mitochondrial [OS=Saccharomyces cerevisiae S288c]                    | 853159 | LSC2; YGR244C        | metabolic process                                                       | mitochondrion                                          | catalytic activity;nucleotide binding                               | 9      | 12.46  | 1.38 |
| P53170 | [Pyruvate dehydrogenase (acetyl-transferring)] kinase 2, mitochondrial [OS=Saccharomyces cerevisiae S288c]           | 852821 | PKP2; YGL059W        | metabolic process;regulation of biological process                      | mitochondrion;organelle lumen                          | catalytic activity;nucleotide binding;protein binding               | 0.28   | 0.389  | 1.39 |
| P32898 | Mitochondrial presequence protease [OS=Saccharomyces cerevisiae S288c]                                               | 852041 | CYM1; YDR430C        | metabolic process                                                       | mitochondrion                                          | catalytic activity;metal ion binding                                | 0.682  | 0.951  | 1.39 |
| Q08822 | Probable electron transfer flavoprotein-ubiquinone oxidoreductase, mitochondrial [OS=Saccharomyces cerevisiae S288c] | 854538 | CIR2; YOR356W        | metabolic process;transport                                             | membrane;mitochondrion                                 | catalytic activity;metal ion binding;nucleotide binding             | 2.162  | 3.019  | 1.40 |
| P32902 | 37S ribosomal protein MRP4, mitochondrial [OS=Saccharomyces cerevisiae S288c]                                        | 856384 | MRP4; YHL004W        | cell organization and biogenesis;metabolic process                      | mitochondrion;ribosome                                 | structural molecule activity                                        | 0.334  | 0.468  | 1.40 |
| P48015 | Aminomethyltransferase, mitochondrial [OS=Saccharomyces cerevisiae S288c]                                            | 851582 | GCV1; YDR019C        | metabolic process                                                       | mitochondrion                                          | catalytic activity;protein binding                                  | 6.406  | 9      | 1.40 |
| P32454 | Aminopeptidase 2, mitochondrial [OS=Saccharomyces cerevisiae S288c]                                                  | 853699 | APE2; YKL157W        | metabolic process                                                       | cytoplasm;extracellular;membrane;mitochondrion;nucleus | catalytic activity;metal ion binding                                | 1.668  | 2.346  | 1.41 |
| Q06892 | NADH kinase POS5, mitochondrial [OS=Saccharomyces cerevisiae S288c]                                                  | 855913 | POS5; YPL188W        | metabolic process;response to stimulus                                  | mitochondrion;organelle lumen                          | catalytic activity;nucleotide binding                               | 0.369  | 0.52   | 1.41 |
| Q02950 | 37S ribosomal protein MRP51, mitochondrial [OS=Saccharomyces cerevisiae S288c]                                       | 855985 | MRP51; YPL118W       | cell organization and biogenesis;metabolic process                      | mitochondrion;ribosome                                 | structural molecule activity                                        | 0.817  | 1.154  | 1.41 |
| P40035 | Mitochondrial phosphate carrier protein 2 [OS=Saccharomyces cerevisiae S288c]                                        | 856779 | PIC2; YER053C        | cellular homeostasis;metabolic process;transport                        | membrane;mitochondrion                                 | structural molecule activity;transporter activity                   | 1.976  | 2.793  | 1.41 |
| Q01852 | Mitochondrial import inner membrane translocase subunit TIM44 [OS=Saccharomyces cerevisiae S288c]                    | 854790 | TIM44; YIL022W       | transport                                                               | membrane;mitochondrion                                 | nucleotide binding;protein binding                                  | 4.946  | 7.003  | 1.42 |
| P36163 | mitochondrial metalloendopeptidase OMA1 [OS=Saccharomyces cerevisiae S288c]                                          | 853962 | OMA1; YKR087C        | metabolic process                                                       | membrane;mitochondrion                                 | catalytic activity;metal ion binding                                | 0.389  | 0.551  | 1.42 |
| P43617 | Uncharacterized mitochondrial carrier YFR045W [OS=Saccharomyces cerevisiae S288c]                                    | 850606 | YFR045W; YFR045W     | metabolic process;transport                                             | membrane;mitochondrion                                 | structural molecule activity;transporter activity                   | 0.413  | 0.585  | 1.42 |
| P36534 | 54S ribosomal protein L40, mitochondrial [OS=Saccharomyces cerevisiae S288c]                                         | 855930 | MRPL40; YPL173W      | cell organization and biogenesis;metabolic process                      | mitochondrion;ribosome                                 | protein binding;structural molecule activity                        | 0.413  | 0.585  | 1.42 |
| Q12166 | 2-isopropylmalate synthase 2, mitochondrial [OS=Saccharomyces cerevisiae S288c]                                      | 854275 | LEU9; YOR108W        | metabolic process                                                       | mitochondrion                                          | catalytic activity;protein binding                                  | 2.065  | 2.932  | 1.42 |
| Q03798 | Altered inheritance of mitochondria protein 36, mitochondrial [OS=Saccharomyces cerevisiae S288c]                    | 855189 | AIM36; YMR157C       |                                                                         | membrane;mitochondrion                                 |                                                                     | 0.438  | 0.624  | 1.42 |
| P06168 | ketol-acid reductoisomerase, mitochondrial [OS=Saccharomyces cerevisiae S288c]                                       | 851069 | ILV5; YLR355C        | cell organization and biogenesis;metabolic process                      | mitochondrion                                          | catalytic activity;DNA binding;metal ion binding                    | 10.788 | 15.379 | 1.43 |
| P05626 | ATP synthase subunit 4, mitochondrial [OS=Saccharomyces                                                              | 856027 | ATP4; YPL078         | cell organization and biogenesis;metabolic                              | membrane;mitochondrion                                 | catalytic activity;transporter                                      | 2.162  | 3.084  | 1.43 |

|          | cerevisiae S288c]                                                                                                  |        | C                    | process;transport                                                                                        |                                                  | activity                                                                               |        |        |      |
|----------|--------------------------------------------------------------------------------------------------------------------|--------|----------------------|----------------------------------------------------------------------------------------------------------|--------------------------------------------------|----------------------------------------------------------------------------------------|--------|--------|------|
| P32795   | Mitochondrial inner membrane i-AAA protease supercomplex subunit YME1 [OS=Saccharomyces cerevisiae S288c]          | 856135 | YME1; YPR024W        | metabolic process;response to stimulus;transport                                                         | membrane;mitochondrion                           | catalytic activity;metal ion binding;nucleotide binding;protein binding                | 0.986  | 1.415  | 1.44 |
| P00359   | Glyceraldehyde-3-phosphate dehydrogenase 3 [OS=Saccharomyces cerevisiae S288c]                                     | 853106 | TDH3; YGR192C        | cell death;metabolic process                                                                             | cytoplasm;cytosol;membrane;mitochondrion;nucleus | catalytic activity;nucleotide binding;RNA binding                                      | 3.962  | 5.7    | 1.44 |
| P08417   | fumarate hydratase, mitochondrial [OS=Saccharomyces cerevisiae S288c]                                              | 855866 | FUM1; YPL262W        | cell organization and biogenesis;metabolic process                                                       | cytoplasm;cytosol;mitochondrion;organelle lumen  | catalytic activity                                                                     | 5.21   | 7.532  | 1.45 |
| P42940   | Probable electron transfer flavoprotein subunit beta [OS=Saccharomyces cerevisiae S288c]                           | 853121 | CIR1; YGR207C        | metabolic process;transport                                                                              | mitochondrion;organelle lumen                    |                                                                                        | 2.652  | 3.87   | 1.46 |
| P33416   | Heat shock protein 78, mitochondrial [OS=Saccharomyces cerevisiae S288c]                                           | 851845 | HSP78; YDR258C       | cell organization and biogenesis;metabolic process;regulation of biological process;response to stimulus | mitochondrion;organelle lumen                    | catalytic activity;nucleotide binding;protein binding                                  | 3.042  | 4.466  | 1.47 |
| P52893   | probable alanine aminotransferase, mitochondrial [OS=Saccharomyces cerevisiae S288c]                               | 850778 | ALT1; YLR089C        | metabolic process                                                                                        | mitochondrion;organelle lumen                    | catalytic activity                                                                     | 1.102  | 1.626  | 1.48 |
| P36046   | Mitochondrial intermembrane space import and assembly protein 40 [OS=Saccharomyces cerevisiae S288c]               | 853639 | MIA40; YKL195W       | cellular component movement;metabolic process;response to stimulus;transport                             | membrane;mitochondrion                           | catalytic activity;protein binding;transporter activity                                | 1.555  | 2.3    | 1.48 |
| P37292   | Serine hydroxymethyltransferase, mitochondrial [OS=Saccharomyces cerevisiae S288c]                                 | 852565 | SHM1; YBR263W        | metabolic process                                                                                        | mitochondrion                                    | catalytic activity                                                                     | 6.565  | 9.723  | 1.48 |
| P53311   | Mitochondrial pyruvate carrier 3 [OS=Saccharomyces cerevisiae S288c]                                               | 853158 | FMP43; MPC3; YGR243W | transport                                                                                                | membrane;mitochondrion                           | transporter activity                                                                   | 0.778  | 1.154  | 1.48 |
| P25039   | Elongation factor G, mitochondrial [OS=Saccharomyces cerevisiae S288c]                                             | 850758 | MEF1; YLR069C        | cell organization and biogenesis;metabolic process                                                       | cytosol;mitochondrion                            | catalytic activity;nucleotide binding;RNA binding                                      | 0.456  | 0.677  | 1.48 |
| P16387   | Pyruvate dehydrogenase E1 component subunit alpha, mitochondrial [OS=Saccharomyces cerevisiae S288c]               | 856925 | PDA1; YER178W        | cell growth;metabolic process                                                                            | mitochondrion;organelle lumen                    | catalytic activity                                                                     | 12.46  | 18.513 | 1.49 |
| Q07651   | SUR7 family protein FMP45 [OS=Saccharomyces cerevisiae S288c]                                                      | 851304 | FMP45; YDL222C       | cell differentiation;cell organization and biogenesis                                                    | membrane;mitochondrion                           |                                                                                        | 6.017  | 9      | 1.50 |
| P33303   | Succinate/fumarate mitochondrial transporter [OS=Saccharomyces cerevisiae S288c]                                   | 853558 | SFC1; YJR095W        | metabolic process;transport                                                                              | membrane;mitochondrion                           | structural molecule activity;transporter activity                                      | 11.915 | 17.957 | 1.51 |
| Q04728   | Arginine biosynthesis bifunctional protein ArgJ, mitochondrial [OS=Saccharomyces cerevisiae S288c]                 | 855084 | ARG7; YMR062C        | metabolic process                                                                                        | mitochondrion;organelle lumen                    | catalytic activity                                                                     | 0.417  | 0.63   | 1.51 |
| P06208-1 | 2-isopropylmalate synthase [OS=Saccharomyces cerevisiae S288c]                                                     | 855619 | LEU4; YNL104C        | metabolic process                                                                                        | cytoplasm;mitochondrion                          | catalytic activity;protein binding                                                     | 4.878  | 7.377  | 1.51 |
| P38988   | Mitochondrial GTP/GDP carrier protein 1 [OS=Saccharomyces cerevisiae S288c]                                        | 851329 | GGC1; YDL198C        | cell organization and biogenesis;cellular homeostasis;metabolic process;transport                        | membrane;mitochondrion                           | structural molecule activity;transporter activity                                      | 3.16   | 4.78   | 1.51 |
| P10662   | 37S ribosomal protein MRP1, mitochondrial [OS=Saccharomyces cerevisiae S288c]                                      | 851948 | MRP1; YDR347W        | cell organization and biogenesis;metabolic process;response to stimulus                                  | mitochondrion;ribosome                           | antioxidant activity;catalytic activity;metal ion binding;structural molecule activity | 0.995  | 1.512  | 1.52 |
| P00358   | glyceraldehyde-3-phosphate dehydrogenase 2 [OS=Saccharomyces cerevisiae S288c]                                     | 853465 | TDH2; YJR009C        | cell death;metabolic process                                                                             | cytoplasm;cytosol;membrane;mitochondrion;nucleus | catalytic activity;nucleotide binding;protein binding                                  | 2.008  | 3.062  | 1.52 |
| Q01217   | Protein ARG5,6, mitochondrial [OS=Saccharomyces cerevisiae S288c]                                                  | 856800 | ARG5,6 ; YER069W     | metabolic process;regulation of biological process                                                       | cytoplasm;mitochondrion;organelle lumen          | catalytic activity;nucleotide binding;protein binding                                  | 0.087  | 0.134  | 1.54 |
| P36775   | Lon protease homolog, mitochondrial [OS=Saccharomyces cerevisiae S288c]                                            | 852259 | PIM1; YBL022C        | cell organization and biogenesis;metabolic process;regulation of biological process;response to stimulus | cytoplasm;mitochondrion;organelle lumen          | catalytic activity;DNA binding;nucleotide binding;RNA binding                          | 0.792  | 1.222  | 1.54 |
| P32445   | Single-stranded DNA-binding protein RIM1, mitochondrial [OS=Saccharomyces cerevisiae S288c]                        | 850395 | RIM1; YCR028C-A      | cell organization and biogenesis;metabolic process;regulation of biological process                      | mitochondrion                                    | DNA binding                                                                            | 1.154  | 1.783  | 1.55 |
| P37298   | Succinate dehydrogenase [ubiquinone] cytochrome b small subunit, mitochondrial [OS=Saccharomyces cerevisiae S288c] | 851758 | SDH4; YDR178W        | metabolic process;transport                                                                              | membrane;mitochondrion                           | catalytic activity;metal ion binding                                                   | 1.154  | 1.783  | 1.55 |
| P39533   | Homocitrate dehydratase,                                                                                           | 85323  | ACO2;                | metabolic process                                                                                        | mitochondrion                                    | catalytic                                                                              | 0.11   | 0.17   | 1.55 |

|        |                                                                                                            |        |                         |                                                                                                  |                                                      |                                                                           |        |        |      |
|--------|------------------------------------------------------------------------------------------------------------|--------|-------------------------|--------------------------------------------------------------------------------------------------|------------------------------------------------------|---------------------------------------------------------------------------|--------|--------|------|
|        | mitochondrial [OS=Saccharomyces cerevisiae S288c]                                                          | 0      | YJL200C                 |                                                                                                  |                                                      | activity;metal ion binding                                                |        |        |      |
| P39722 | Mitochondrial Rho GTPase 1 [OS=Saccharomyces cerevisiae S288c]                                             | 851249 | GEM1; YAL048C           | cell organization and biogenesis;regulation of biological process;response to stimulus;transport | membrane;mitochondrion                               | catalytic activity;metal ion binding;nucleotide binding                   | 0.122  | 0.189  | 1.55 |
| P23180 | Probable oxidoreductase AIM17 [OS=Saccharomyces cerevisiae S288c]                                          | 856365 | AIM17; YHL021C          | cell organization and biogenesis;metabolic process                                               | mitochondrion                                        | catalytic activity;metal ion binding                                      | 2.981  | 4.623  | 1.55 |
| P36112 | MICOS complex subunit Mic60 [OS=Saccharomyces cerevisiae S288c]                                            | 853886 | FCJ1; MIC60; YKR016W    | cell organization and biogenesis;transport                                                       | membrane;mitochondrion                               |                                                                           | 11.798 | 18.307 | 1.55 |
| P38756 | tRNA threonylcarbamoyladenine dehydratase 1 [OS=Saccharomyces cerevisiae S288c]                            | 856392 | TCD1; YHR003C; YHR003C  | metabolic process                                                                                | cytosol;membrane;mitochondrion                       | catalytic activity;nucleotide binding                                     | 0.194  | 0.304  | 1.57 |
| Q05648 | MIOREX complex component 10 [OS=Saccharomyces cerevisiae S288c]                                            | 851876 | YDR282C; MRX10; YDR282C |                                                                                                  | membrane;mitochondrion                               |                                                                           | 0.222  | 0.35   | 1.58 |
| P02381 | Ribosomal protein VAR1, mitochondrial [OS=Saccharomyces cerevisiae S288c]                                  | 854586 | VAR1; Q0140             | cell organization and biogenesis;metabolic process                                               | mitochondrion;ribosome                               | structural molecule activity                                              | 0.233  | 0.369  | 1.58 |
| P07256 | Cytochrome b-c1 complex subunit 1, mitochondrial [OS=Saccharomyces cerevisiae S288c]                       | 852235 | COR1; YBL045C           | metabolic process;transport                                                                      | membrane;mitochondrion                               | catalytic activity;metal ion binding;protein binding;transporter activity | 9.89   | 15.681 | 1.59 |
| P40530 | [Pyruvate dehydrogenase (acetyl-transferring)] kinase 1, mitochondrial [OS=Saccharomyces cerevisiae S288c] | 854769 | PKP1; YIL042C           | metabolic process                                                                                | mitochondrion;organelle lumen                        | catalytic activity;nucleotide binding;protein binding                     | 0.245  | 0.389  | 1.59 |
| P38127 | mitochondrial carrier protein RIM2 [OS=Saccharomyces cerevisiae S288c]                                     | 852491 | RIM2; YBR192W           | cell organization and biogenesis;metabolic process;transport                                     | membrane;mitochondrion                               | structural molecule activity;transporter activity                         | 0.778  | 1.239  | 1.59 |
| Q12466 | tricalbin-1 [OS=Saccharomyces cerevisiae S288c]                                                            | 854253 | TCB1; YOR086C           | cell organization and biogenesis;regulation of biological process                                | endoplasmic reticulum;membrane;mitochondrion         | metal ion binding;protein binding                                         | 0.468  | 0.748  | 1.60 |
| Q08926 | ULP1-interacting protein 4 [OS=Saccharomyces cerevisiae S288c]                                             | 855916 | UIP4; YPL186C           |                                                                                                  | endoplasmic reticulum;membrane;mitochondrion;nucleus |                                                                           | 0.292  | 0.468  | 1.60 |
| Q12283 | Malonyl CoA-acyl carrier protein transacylase, mitochondrial [OS=Saccharomyces cerevisiae S288c]           | 854396 | MCT1; YOR221C           | metabolic process                                                                                | mitochondrion                                        | catalytic activity                                                        | 0.292  | 0.468  | 1.60 |
| Q99297 | Mitochondrial 2-oxodicarboxylate carrier 2 [OS=Saccharomyces cerevisiae S288c]                             | 854397 | ODC2; YOR222W           | metabolic process;transport                                                                      | membrane;mitochondrion                               | structural molecule activity;transporter activity                         | 0.334  | 0.54   | 1.62 |
| Q12106 | MDM10-complementing protein 1 [OS=Saccharomyces cerevisiae S288c]                                          | 854403 | YOR228C; MCP1; YOR228C  | cell organization and biogenesis                                                                 | membrane;mitochondrion                               | catalytic activity                                                        | 0.359  | 0.585  | 1.63 |
| P07342 | Acetolactate synthase catalytic subunit, mitochondrial [OS=Saccharomyces cerevisiae S288c]                 | 855135 | ILV2; YMR108W           | metabolic process                                                                                | mitochondrion                                        | catalytic activity;metal ion binding;nucleotide binding                   | 4.223  | 6.897  | 1.63 |
| P53982 | isocitrate dehydrogenase [NADP] [OS=Saccharomyces cerevisiae S288c]                                        | 855723 | IDP3; YNL009W           | metabolic process                                                                                | cytoplasm;mitochondrion                              | catalytic activity;metal ion binding;nucleotide binding                   | 2.162  | 3.532  | 1.63 |
| P16451 | Pyruvate dehydrogenase complex protein X component, mitochondrial [OS=Saccharomyces cerevisiae S288c]      | 853107 | PDX1; YGR193C           | metabolic process                                                                                | mitochondrion;organelle lumen                        | catalytic activity;structural molecule activity                           | 1.783  | 2.914  | 1.63 |
| Q03246 | 37S ribosomal protein S17, mitochondrial [OS=Saccharomyces cerevisiae S288c]                               | 855226 | MRP517; YMR188C         | cell differentiation;cell organization and biogenesis;metabolic process                          | mitochondrion;ribosome                               | RNA binding;structural molecule activity                                  | 0.389  | 0.638  | 1.64 |
| Q05931 | Heat shock protein SSQ1, mitochondrial [OS=Saccharomyces cerevisiae S288c]                                 | 851084 | SSQ1; YLR369W           | cell organization and biogenesis;metabolic process                                               | mitochondrion;organelle lumen                        | nucleotide binding;protein binding                                        | 0.413  | 0.679  | 1.64 |
| P39987 | Heat shock protein SSC3, mitochondrial [OS=Saccharomyces cerevisiae S288c]                                 | 856682 | ECM10; YEL030W          | cell organization and biogenesis;metabolic process;transport                                     | mitochondrion                                        | nucleotide binding;protein binding                                        | 1.198  | 1.976  | 1.65 |
| Q03104 | Meiotic sister chromatid recombination protein 1 [OS=Saccharomyces cerevisiae S288c]                       | 854911 | MSC1; YML128C           | metabolic process                                                                                | endoplasmic reticulum;membrane;mitochondrion         |                                                                           | 2.415  | 4.012  | 1.66 |
| P39525 | 3-oxoacyl-[acyl-carrier-protein] synthase homolog [OS=Saccharomyces cerevisiae S288c]                      | 856790 | CEM1; YER061C           | metabolic process                                                                                | mitochondrion                                        | catalytic activity                                                        | 0.52   | 0.874  | 1.68 |

|        |                                                                                                                                              |        |                     |                                                                                                                               |                                       |                                                                           |         |         |      |
|--------|----------------------------------------------------------------------------------------------------------------------------------------------|--------|---------------------|-------------------------------------------------------------------------------------------------------------------------------|---------------------------------------|---------------------------------------------------------------------------|---------|---------|------|
| P32843 | Mitochondrial escape protein 2 [OS=Saccharomyces cerevisiae S288c]                                                                           | 855348 | YME2; YMR302C       | cell organization and biogenesis;metabolic process                                                                            | membrane;mitochondrion                | nucleotide binding;RNA binding                                            | 2.643   | 4.456   | 1.69 |
| P00890 | citrate synthase, mitochondrial [OS=Saccharomyces cerevisiae S288c]                                                                          | 855732 | CIT1; YNR001C       | metabolic process;transport                                                                                                   | cytosol;mitochondrion;organelle lumen | catalytic activity                                                        | 12.895  | 21.758  | 1.69 |
| P53736 | Uncharacterized protein YNR040W [OS=Saccharomyces cerevisiae S288c]                                                                          | 855776 | YNR040W; YNR040W    |                                                                                                                               | mitochondrion                         |                                                                           | 0.551   | 0.931   | 1.69 |
| P18239 | ADP,ATP carrier protein 2 [OS=Saccharomyces cerevisiae S288c]                                                                                | 852250 | PET9; YBL030C       | cell death;metabolic process;transport                                                                                        | membrane;mitochondrion                | structural molecule activity;transporter activity                         | 167.761 | 283.804 | 1.69 |
| P00927 | Threonine dehydratase, mitochondrial [OS=Saccharomyces cerevisiae S288c]                                                                     | 856819 | ILV1; YER086W       | metabolic process                                                                                                             | cytoplasm;mitochondrion               | catalytic activity                                                        | 0.914   | 1.572   | 1.72 |
| Q08179 | Mitochondrial distribution and morphology protein 38 [OS=Saccharomyces cerevisiae S288c]                                                     | 854130 | MDM38; YOL027C      | cell organization and biogenesis;cellular homeostasis;regulation of biological process;transport                              | membrane;mitochondrion                |                                                                           | 4.309   | 7.414   | 1.72 |
| P50085 | Prohibitin-2 [OS=Saccharomyces cerevisiae S288c]                                                                                             | 853146 | PHB2; YGR231C       | cell organization and biogenesis;metabolic process;regulation of biological process                                           | membrane;mitochondrion                | protein binding                                                           | 2.511   | 4.337   | 1.73 |
| P53140 | Protein RMD9, mitochondrial [OS=Saccharomyces cerevisiae S288c]                                                                              | 852771 | RMD9; YGL107C       | cell differentiation;metabolic process;regulation of biological process                                                       | membrane;mitochondrion                | RNA binding                                                               | 0.668   | 1.154   | 1.73 |
| Q02784 | Monothiol glutaredoxin-5, mitochondrial [OS=Saccharomyces cerevisiae S288c]                                                                  | 856048 | GRX5; YPL059W       | cell organization and biogenesis;cellular homeostasis;metabolic process;regulation of biological process;response to stimulus | mitochondrion;organelle lumen         | catalytic activity;metal ion binding                                      | 0.668   | 1.154   | 1.73 |
| Q6Q560 | Protein isd11 [OS=Saccharomyces cerevisiae S288c]                                                                                            | 856774 | ISD11; YER048W-A    | cell organization and biogenesis;metabolic process                                                                            | mitochondrion;organelle lumen         | catalytic activity;protein binding                                        | 0.668   | 1.154   | 1.73 |
| P53598 | Succinyl-CoA ligase [ADP-forming] subunit alpha, mitochondrial [OS=Saccharomyces cerevisiae S288c]                                           | 854310 | LSC1; YOR142W       | metabolic process                                                                                                             | cytosol;mitochondrion                 | catalytic activity;nucleotide binding                                     | 5.952   | 10.288  | 1.73 |
| P11325 | Leucine-tRNA ligase, mitochondrial [OS=Saccharomyces cerevisiae S288c]                                                                       | 851098 | NAM2; YLR382C       | cell organization and biogenesis;metabolic process;regulation of biological process                                           | cytosol;mitochondrion;organelle lumen | catalytic activity;nucleotide binding;RNA binding                         | 0.12    | 0.208   | 1.73 |
| P53326 | Uncharacterized protein YGR266W [OS=Saccharomyces cerevisiae S288c]                                                                          | 853182 | YGR266W; YGR266W    |                                                                                                                               | membrane;mitochondrion                |                                                                           | 0.299   | 0.52    | 1.74 |
| P53220 | Mitochondrial import inner membrane translocase subunit TIM21 [OS=Saccharomyces cerevisiae S288c]                                            | 852921 | TIM21; YGR033C      | cell organization and biogenesis;transport                                                                                    | membrane;mitochondrion                | protein binding                                                           | 0.719   | 1.254   | 1.74 |
| P34227 | Mitochondrial peroxiredoxin PRX1 [OS=Saccharomyces cerevisiae S288c]                                                                         | 852215 | PRX1; YBL064C       | cellular homeostasis;metabolic process;regulation of biological process;response to stimulus                                  | mitochondrion                         | antioxidant activity;catalytic activity                                   | 5.158   | 9       | 1.74 |
| P00410 | Cytochrome c oxidase subunit 2 [OS=Saccharomyces cerevisiae S288c]                                                                           | 854622 | COX2; Q0250         | metabolic process;transport                                                                                                   | membrane;mitochondrion                | catalytic activity;metal ion binding;protein binding;transporter activity | 1.61    | 2.831   | 1.76 |
| Q02204 | 54S ribosomal protein L13, mitochondrial [OS=Saccharomyces cerevisiae S288c]                                                                 | 853875 | MRPL13; YKR006C     | cell organization and biogenesis;metabolic process                                                                            | mitochondrion;ribosome                | structural molecule activity                                              | 0.778   | 1.371   | 1.76 |
| P36147 | Presequence translocated-associated motor subunit pam17, mitochondrial [OS=Saccharomyces cerevisiae S288c]                                   | 853939 | PAM17; YKR065C      | transport                                                                                                                     | membrane;mitochondrion                |                                                                           | 0.778   | 1.371   | 1.76 |
| P32473 | Pyruvate dehydrogenase E1 component subunit beta, mitochondrial [OS=Saccharomyces cerevisiae S288c]                                          | 852522 | PDB1; YBR221C       | metabolic process                                                                                                             | mitochondrion;organelle lumen         | catalytic activity                                                        | 4.456   | 7.859   | 1.76 |
| P38077 | ATP synthase subunit gamma, mitochondrial [OS=Saccharomyces cerevisiae S288c]                                                                | 852327 | ATP3; YBR039W       | metabolic process;transport                                                                                                   | membrane;mitochondrion                | catalytic activity;transporter activity                                   | 9       | 15.876  | 1.76 |
| Q12298 | uncharacterized ABC transporter ATP-binding protein YDR061W [OS=Saccharomyces cerevisiae S288c]                                              | 851633 | YDR061W; YDR061W    |                                                                                                                               | mitochondrion                         | catalytic activity;nucleotide binding                                     | 0.194   | 0.343   | 1.77 |
| P12695 | Dihydrolipoyllysine-residue acetyltransferase component of pyruvate dehydrogenase complex, mitochondrial [OS=Saccharomyces cerevisiae S288c] | 855653 | LAT1; YNL071W       | metabolic process                                                                                                             | mitochondrion;organelle lumen         | catalytic activity                                                        | 7.62    | 13.497  | 1.77 |
| P30902 | ATP synthase subunit d, mitochondrial [OS=Saccharomyces cerevisiae S288c]                                                                    | 853853 | ATP7; YKL016C       | metabolic process;transport                                                                                                   | membrane;mitochondrion                | catalytic activity;transporter activity                                   | 4.179   | 7.483   | 1.79 |
| Q96VH5 | MICOS complex subunit Mic10 [OS=Saccharomyces cerevisiae S288c]                                                                              | 850300 | MOS1; MIC10; YCL057 | cell organization and biogenesis                                                                                              | membrane;mitochondrion                |                                                                           | 0.931   | 1.683   | 1.81 |

|          |                                                                                                              |        | C-A                    |                                                                                              |                                                       |                                                                           |  |        |        |      |
|----------|--------------------------------------------------------------------------------------------------------------|--------|------------------------|----------------------------------------------------------------------------------------------|-------------------------------------------------------|---------------------------------------------------------------------------|--|--------|--------|------|
| Q06493   | LETM1 domain-containing protein YLH47, mitochondrial [OS=Saccharomyces cerevisiae S288c]                     | 856243 | YLH47; YPR125W         | cell organization and biogenesis;transport                                                   | membrane;mitochondrion                                |                                                                           |  | 0.487  | 0.887  | 1.82 |
| P47127   | Altered inheritance of mitochondria protein 24, mitochondrial [OS=Saccharomyces cerevisiae S288c]            | 853543 | AIM24; YJR080C         | cell organization and biogenesis                                                             | mitochondrion                                         |                                                                           |  | 2.857  | 5.21   | 1.82 |
| Q04458   | Fatty aldehyde dehydrogenase HFD1 [OS=Saccharomyces cerevisiae S288c]                                        | 855137 | HFD1; YMR110C          | metabolic process                                                                            | endoplasmic reticulum;endosome;membrane;mitochondrion | catalytic activity                                                        |  | 1.783  | 3.262  | 1.83 |
| P08067   | cytochrome b-c1 complex subunit Rieske, mitochondrial [OS=Saccharomyces cerevisiae S288c]                    | 856689 | RIP1; YEL024W          | metabolic process;transport                                                                  | membrane;mitochondrion                                | catalytic activity;metal ion binding;transporter activity                 |  | 11.115 | 20.544 | 1.85 |
| P40185   | Protein mmf1, mitochondrial [OS=Saccharomyces cerevisiae S288c]                                              | 854760 | MMF1; YIL051C          | cell organization and biogenesis;metabolic process                                           | mitochondrion;organelle lumen                         |                                                                           |  | 2.162  | 4.012  | 1.86 |
| P40053   | Altered inheritance of mitochondria protein 9, mitochondrial [OS=Saccharomyces cerevisiae S288c]             | 856813 | AIM9; YER080W          |                                                                                              | mitochondrion                                         |                                                                           |  | 1.798  | 3.348  | 1.86 |
| P38797   | Protein phosphatase 2C homolog 7, mitochondrial [OS=Saccharomyces cerevisiae S288c]                          | 856475 | PTC7; YHR076W          | metabolic process                                                                            | mitochondrion                                         | catalytic activity;metal ion binding;protein binding                      |  | 0.369  | 0.688  | 1.86 |
| Q08818   | Meiotic sister-chromatid recombination protein 6, mitochondrial [OS=Saccharomyces cerevisiae S288c]          | 854536 | MSC6; YOR354C          | metabolic process                                                                            | mitochondrion;organelle lumen                         | RNA binding                                                               |  | 0.506  | 0.945  | 1.87 |
| P32796-1 | Carnitine O-acetyltransferase, mitochondrial [OS=Saccharomyces cerevisiae S288c]                             | 854965 | CAT2; YML042W          | metabolic process;transport                                                                  | membrane;mitochondrion                                | catalytic activity                                                        |  | 5.749  | 10.835 | 1.88 |
| P07257   | Cytochrome b-c1 complex subunit 2, mitochondrial [OS=Saccharomyces cerevisiae S288c]                         | 856321 | QCR2; YPR191W          | metabolic process;transport                                                                  | membrane;mitochondrion                                | catalytic activity;metal ion binding;protein binding;transporter activity |  | 25.49  | 48.239 | 1.89 |
| P07275   | Delta-1-pyrroline-5-carboxylate dehydrogenase, mitochondrial [OS=Saccharomyces cerevisiae S288c]             | 856432 | PUT2; YHR037W          | metabolic process                                                                            | membrane;mitochondrion;organelle lumen                | catalytic activity                                                        |  | 5.136  | 9.723  | 1.89 |
| P36151   | Uncharacterized protein YKR070W [OS=Saccharomyces cerevisiae S288c]                                          | 853944 | YKR070W; YKR070W       | metabolic process                                                                            | mitochondrion                                         |                                                                           |  | 0.438  | 0.833  | 1.90 |
| P23833   | Protein SCO1, mitochondrial [OS=Saccharomyces cerevisiae S288c]                                              | 852325 | SCO1; YBR037C          | cell organization and biogenesis;cellular homeostasis;response to stimulus;transport         | membrane;mitochondrion                                | antioxidant activity;catalytic activity;metal ion binding                 |  | 0.468  | 0.896  | 1.91 |
| Q07500   | External NADH-ubiquinone oxidoreductase 2, mitochondrial [OS=Saccharomyces cerevisiae S288c]                 | 851474 | NDE2; YDL085W          | metabolic process                                                                            | mitochondrion                                         | catalytic activity;nucleotide binding                                     |  | 3.299  | 6.356  | 1.93 |
| P38172   | MIOREX complex component 3 [OS=Saccharomyces cerevisiae S288c]                                               | 852181 | YBL095W; MRX3; YBL095W |                                                                                              | membrane;mitochondrion                                |                                                                           |  | 0.501  | 0.968  | 1.93 |
| P32860   | NifU-like protein, mitochondrial [OS=Saccharomyces cerevisiae S288c]                                         | 853826 | NFU1; YKL040C          | cell organization and biogenesis;cellular homeostasis;metabolic process                      | mitochondrion;organelle lumen                         | metal ion binding                                                         |  | 1.371  | 2.652  | 1.93 |
| Q00711   | Succinate dehydrogenase [ubiquinone] flavoprotein subunit, mitochondrial [OS=Saccharomyces cerevisiae S288c] | 853709 | SDH1; YKL148C          | metabolic process;transport                                                                  | membrane;mitochondrion                                | catalytic activity;nucleotide binding;protein binding                     |  | 9.578  | 18.619 | 1.94 |
| P41921   | glutathione reductase [OS=Saccharomyces cerevisiae S288c]                                                    | 856014 | GLR1; YPL091W          | cellular homeostasis;metabolic process;regulation of biological process;response to stimulus | cytoplasm;cytosol;mitochondrion;nucleus               | antioxidant activity;catalytic activity;nucleotide binding                |  | 0.334  | 0.655  | 1.96 |
| P23641   | mitochondrial phosphate carrier protein [OS=Saccharomyces cerevisiae S288c]                                  | 853540 | MIR1; YJR077C          | metabolic process;transport                                                                  | membrane;mitochondrion                                | protein binding;structural molecule activity;transporter activity         |  | 13.678 | 26.826 | 1.96 |
| P36013   | NAD-dependent malic enzyme, mitochondrial [OS=Saccharomyces cerevisiae S288c]                                | 853839 | MAE1; YKL029C          | metabolic process                                                                            | mitochondrion;organelle lumen                         | catalytic activity;metal ion binding;nucleotide binding                   |  | 1.512  | 2.981  | 1.97 |
| P32317   | Protein AFG1 [OS=Saccharomyces cerevisiae S288c]                                                             | 856658 | AFG1; YEL052W          | cell organization and biogenesis;metabolic process;response to stimulus;transport            | membrane;mitochondrion                                | catalytic activity;nucleotide binding                                     |  | 0.585  | 1.154  | 1.97 |
| P36525   | 54S ribosomal protein L24, mitochondrial [OS=Saccharomyces cerevisiae S288c]                                 | 855231 | MRPL24; YMR193W        | cell organization and biogenesis;metabolic process                                           | mitochondrion;ribosome                                | RNA binding;structural molecule activity                                  |  | 0.585  | 1.154  | 1.97 |
| P47052   | succinate dehydrogenase                                                                                      | 85340  | YIL045                 | metabolic process;transport                                                                  | membrane;mitochondrion                                | catalytic                                                                 |  | 1.88   | 3.739  | 1.99 |

|        |                                                                                                               |        |                    |                                                                                                          |                                                          |                                                                                |        |        |      |
|--------|---------------------------------------------------------------------------------------------------------------|--------|--------------------|----------------------------------------------------------------------------------------------------------|----------------------------------------------------------|--------------------------------------------------------------------------------|--------|--------|------|
|        | [ubiquinone] flavoprotein subunit 2, mitochondrial [OS=Saccharomyces cerevisiae S288c]                        | 5      | W;<br>YJL045<br>W  |                                                                                                          |                                                          | activity;nucleotide binding                                                    |        |        |      |
| P23644 | Mitochondrial import receptor subunit TOM40 [OS=Saccharomyces cerevisiae S288c]                               | 855243 | TOM40;<br>YMR203W  | transport                                                                                                | cytosol;membrane;mitochondrion                           | protein binding;transporter activity                                           | 0.896  | 1.783  | 1.99 |
| P54783 | D-arabinono-1,4-lactone oxidase [OS=Saccharomyces cerevisiae S288c]                                           | 854888 | ALO1;<br>YML086C   | metabolic process;response to stimulus                                                                   | membrane;mitochondrion                                   | catalytic activity;nucleotide binding                                          | 2.415  | 4.843  | 2.01 |
| P35191 | DnaJ homolog 1, mitochondrial [OS=Saccharomyces cerevisiae S288c]                                             | 850530 | MDJ1;<br>YFL016C   | cell organization and biogenesis;metabolic process;regulation of biological process;response to stimulus | mitochondrion;organelle lumen                            | enzyme regulator activity;metal ion binding;nucleotide binding;protein binding | 1.656  | 3.329  | 2.01 |
| P38891 | Branched-chain-amino-acid aminotransferase, mitochondrial [OS=Saccharomyces cerevisiae S288c]                 | 856615 | BAT1;<br>YHR208W   | metabolic process;regulation of biological process;response to stimulus                                  | mitochondrion;organelle lumen                            | catalytic activity                                                             | 6.305  | 12.689 | 2.01 |
| P38825 | Protein TOM71 [OS=Saccharomyces cerevisiae S288c]                                                             | 856517 | TOM71;<br>YHR117W  | transport                                                                                                | membrane;mitochondrion                                   | protein binding;transporter activity                                           | 0.512  | 1.031  | 2.01 |
| Q04935 | Cytochrome c oxidase protein 20, mitochondrial [OS=Saccharomyces cerevisiae S288c]                            | 851817 | COX20;<br>YDR231C  | cell organization and biogenesis;metabolic process                                                       | membrane;mitochondrion                                   | protein binding                                                                | 0.701  | 1.424  | 2.03 |
| P38071 | Enoyl-[acyl-carrier protein] reductase [NADPH, B-specific], mitochondrial [OS=Saccharomyces cerevisiae S288c] | 852314 | ETR1;<br>YBR026C   | metabolic process                                                                                        | mitochondrion;organelle lumen                            | catalytic activity;DNA binding;metal ion binding                               | 4.926  | 10.103 | 2.05 |
| P40008 | Protein FMP52, mitochondrial [OS=Saccharomyces cerevisiae S288c]                                              | 856721 | FMP52;<br>YER004W  |                                                                                                          | endoplasmic reticulum;membrane;mitochondrion             | catalytic activity                                                             | 1.054  | 2.162  | 2.05 |
| Q12171 | Mitochondrial distribution and morphology protein 32 [OS=Saccharomyces cerevisiae S288c]                      | 854318 | MDM32;<br>YOR147W  | cell organization and biogenesis;cellular homeostasis                                                    | membrane;mitochondrion                                   |                                                                                | 0.066  | 0.136  | 2.06 |
| P32606 | putative mitochondrial translation system component PET127 [OS=Saccharomyces cerevisiae S288c]                | 854182 | PET127;<br>YOR017W | cell organization and biogenesis;metabolic process;regulation of biological process                      | mitochondrion                                            |                                                                                | 0.048  | 0.099  | 2.06 |
| P39925 | Mitochondrial respiratory chain complexes assembly protein AFG3 [OS=Saccharomyces cerevisiae S288c]           | 856737 | AFG3;<br>YER017C   | cell organization and biogenesis;metabolic process;response to stimulus;transport                        | membrane;mitochondrion                                   | catalytic activity;metal ion binding;nucleotide binding;protein binding        | 0.65   | 1.342  | 2.06 |
| P20967 | 2-oxoglutarate dehydrogenase, mitochondrial [OS=Saccharomyces cerevisiae S288c]                               | 854681 | KGD1;<br>YIL125W   | metabolic process                                                                                        | cytosol;mitochondrion;organelle lumen                    | catalytic activity                                                             | 15.843 | 32.752 | 2.07 |
| P00427 | Cytochrome c oxidase subunit 6, mitochondrial [OS=Saccharomyces cerevisiae S288c]                             | 856448 | COX6;<br>YHR051W   | metabolic process;transport                                                                              | membrane;mitochondrion                                   | catalytic activity;metal ion binding;transporter activity                      | 0.778  | 1.61   | 2.07 |
| P03874 | Cytochrome B pre-mRNA-processing protein 2 [OS=Saccharomyces cerevisiae S288c]                                | 856347 | CBP2;<br>YHL038C   | metabolic process                                                                                        | mitochondrion                                            | RNA binding                                                                    | 0.068  | 0.141  | 2.07 |
| P40051 | Intermediate cleaving peptidase 55 [OS=Saccharomyces cerevisiae S288c]                                        | 856811 | ICP55;<br>YER078C  | metabolic process;regulation of biological process                                                       | membrane;mitochondrion                                   | catalytic activity;metal ion binding                                           | 0.077  | 0.16   | 2.08 |
| P09950 | 5-aminolevulinic synthase, mitochondrial [OS=Saccharomyces cerevisiae S288c]                                  | 851818 | HEM1;<br>YDR232W   | metabolic process                                                                                        | mitochondrion;organelle lumen                            | catalytic activity                                                             | 0.086  | 0.179  | 2.08 |
| Q02863 | ubiquitin carboxyl-terminal hydrolase 16 [OS=Saccharomyces cerevisiae S288c]                                  | 856032 | UBP16;<br>YPL072W  | metabolic process                                                                                        | membrane;mitochondrion                                   | catalytic activity                                                             | 0.072  | 0.15   | 2.08 |
| P08466 | mitochondrial nuclease [OS=Saccharomyces cerevisiae S288c]                                                    | 853222 | NUC1;<br>YJL208C   | cell death;metabolic process                                                                             | membrane;mitochondrion;nucleus                           | catalytic activity;metal ion binding                                           | 1.336  | 2.793  | 2.09 |
| P49367 | Homoaconitase, mitochondrial [OS=Saccharomyces cerevisiae S288c]                                              | 851820 | LYS4;<br>YDR234W   | metabolic process                                                                                        | mitochondrion                                            | catalytic activity;metal ion binding;protein binding                           | 0.551  | 1.154  | 2.09 |
| P19882 | heat shock protein 60, mitochondrial [OS=Saccharomyces cerevisiae S288c]                                      | 850963 | HSP60;<br>YLR259C  | cell organization and biogenesis;metabolic process;regulation of biological process;transport            | cytoplasm;cytosol;membrane;mitochondrion;organelle lumen | catalytic activity;DNA binding;nucleotide binding;protein binding              | 39.296 | 82.378 | 2.10 |
| P38122 | 3-methyl-2-oxobutanoate hydroxymethyltransferase [OS=Saccharomyces cerevisiae S288c]                          | 852474 | ECM31;<br>YBR176W  | metabolic process                                                                                        | mitochondrion                                            | catalytic activity                                                             | 0.122  | 0.259  | 2.12 |
| P07143 | Cytochrome c1, heme protein, mitochondrial [OS=Saccharomyces cerevisiae S288c]                                | 854231 | CYT1;<br>YOR065W   | metabolic process;transport                                                                              | cytosol;membrane;mitochondrion                           | metal ion binding                                                              | 10.938 | 23.245 | 2.13 |
| P28625 | Protein YIM1 [OS=Saccharomyces cerevisiae S288c]                                                              | 855183 | YIM1;<br>YMR152W   | metabolic process;response to stimulus                                                                   | cytoplasm;endoplasmic reticulum;mitochondrion            | catalytic activity;metal ion binding                                           | 0.624  | 1.336  | 2.14 |
| P38884 | Altered inheritance of mitochondria protein 18, mitochondrial [OS=Saccharomyces cerevisiae S288c]             | 856605 | AIM18;<br>YHR198C  |                                                                                                          | mitochondrion                                            | catalytic activity                                                             | 0.145  | 0.311  | 2.14 |

|        |                                                                                                           |        |                        |                                                                                                                    |                                          |                                                                            |        |        |      |  |
|--------|-----------------------------------------------------------------------------------------------------------|--------|------------------------|--------------------------------------------------------------------------------------------------------------------|------------------------------------------|----------------------------------------------------------------------------|--------|--------|------|--|
|        | S288c]                                                                                                    |        |                        |                                                                                                                    |                                          |                                                                            |        |        |      |  |
| Q04472 | Mitochondrial inner membrane i-AAA protease supercomplex subunit MGR3 [OS=Saccharomyces cerevisiae S288c] | 855142 | MGR3; YMR115W          | metabolic process                                                                                                  | membrane;mitochondrion                   | protein binding                                                            | 0.15   | 0.322  | 2.15 |  |
| P09624 | Dihydrolipoyl dehydrogenase, mitochondrial [OS=Saccharomyces cerevisiae S288c]                            | 850527 | LPD1; YFL018C          | cellular homeostasis;metabolic process;regulation of biological process                                            | mitochondrion;organelle lumen            | catalytic activity;nucleotide binding                                      | 23.119 | 49.802 | 2.15 |  |
| P42847 | 37S ribosomal protein S18, mitochondrial [OS=Saccharomyces cerevisiae S288c]                              | 855410 | MRPS18; YNL306W        | cell organization and biogenesis;metabolic process                                                                 | mitochondrion;ribosome                   | RNA binding;structural molecule activity                                   | 0.155  | 0.334  | 2.15 |  |
| P14693 | sorting assembly machinery 35 kDa subunit [OS=Saccharomyces cerevisiae S288c]                             | 856483 | SAM35; YHR083W         | cell organization and biogenesis;transport                                                                         | membrane;mitochondrion                   | protein binding                                                            | 0.155  | 0.334  | 2.15 |  |
| P32799 | Cytochrome c oxidase subunit 6A, mitochondrial [OS=Saccharomyces cerevisiae S288c]                        | 852684 | COX13; YGL191W         | cell organization and biogenesis;metabolic process;regulation of biological process;transport                      | membrane;mitochondrion                   | catalytic activity;enzyme regulator activity;transporter activity          | 0.995  | 2.162  | 2.17 |  |
| P40961 | prohibitin-1 [OS=Saccharomyces cerevisiae S288c]                                                          | 853033 | PHB1; YGR132C          | cell organization and biogenesis;metabolic process;regulation of biological process                                | membrane;mitochondrion                   | protein binding                                                            | 2.36   | 5.158  | 2.19 |  |
| P34231 | Uncharacterized protein YKL187C [OS=Saccharomyces cerevisiae S288c]                                       | 853648 | FAT3; YKL187C; YKL187C | cell organization and biogenesis;transport                                                                         | membrane;mitochondrion                   |                                                                            | 0.194  | 0.425  | 2.19 |  |
| Q01976 | ADP-ribose pyrophosphatase [OS=Saccharomyces cerevisiae S288c]                                            | 852408 | YSA1; YBR111C          | metabolic process                                                                                                  | cytoplasm;mitochondrion;nucleus          | catalytic activity;metal ion binding                                       | 0.194  | 0.425  | 2.19 |  |
| Q03201 | 37S ribosomal protein S10, mitochondrial [OS=Saccharomyces cerevisiae S288c]                              | 851611 | RSM10; YDR041W         | cell organization and biogenesis;metabolic process                                                                 | mitochondrion;ribosome                   | structural molecule activity                                               | 0.194  | 0.425  | 2.19 |  |
| P34222 | Peptidyl-tRNA hydrolase 2 [OS=Saccharomyces cerevisiae S288c]                                             | 852223 | PTH2; YBL057C          | regulation of biological process                                                                                   | cytoplasm;cytosol;membrane;mitochondrion | catalytic activity;protein binding                                         | 0.194  | 0.425  | 2.19 |  |
| P07251 | ATP synthase subunit alpha, mitochondrial [OS=Saccharomyces cerevisiae S288c]                             | 852177 | ATP1; YBL099W          | metabolic process;transport                                                                                        | cytosol;membrane;mitochondrion           | catalytic activity;nucleotide binding;transporter activity                 | 26.826 | 58.948 | 2.20 |  |
| P00830 | ATP synthase subunit beta, mitochondrial [OS=Saccharomyces cerevisiae S288c]                              | 853585 | ATP2; YJR121W          | metabolic process;transport                                                                                        | cytosol;membrane;mitochondrion           | catalytic activity;nucleotide binding;protein binding;transporter activity | 24.119 | 53.117 | 2.20 |  |
| P40165 | NAD(P)H-hydrate epimerase [OS=Saccharomyces cerevisiae S288c]                                             | 855521 | YNL200C; YNL200C       | metabolic process                                                                                                  | cytoplasm;mitochondrion                  | catalytic activity;metal ion binding;nucleotide binding                    | 0.212  | 0.468  | 2.21 |  |
| P34224 | Uncharacterized protein YBL059W [OS=Saccharomyces cerevisiae S288c]                                       | 852221 | YBL059W; YBL059W       |                                                                                                                    | membrane;mitochondrion                   |                                                                            | 0.212  | 0.468  | 2.21 |  |
| P47015 | Altered inheritance of mitochondria protein 23, mitochondrial [OS=Saccharomyces cerevisiae S288c]         | 853310 | AIM23; YJL131C         | metabolic process                                                                                                  | mitochondrion                            | RNA binding                                                                | 0.222  | 0.492  | 2.22 |  |
| P32792 | UPF0744 protein YSC83 [OS=Saccharomyces cerevisiae S288c]                                                 | 856410 | YSC83; YHR017W         |                                                                                                                    | membrane;mitochondrion                   |                                                                            | 0.233  | 0.52   | 2.23 |  |
| P54857 | lipase 2 [OS=Saccharomyces cerevisiae S288c]                                                              | 851628 | TGL2; YDR058C          | metabolic process;transport                                                                                        | mitochondrion                            | catalytic activity                                                         | 0.233  | 0.52   | 2.23 |  |
| P14832 | peptidyl-prolyl cis-trans isomerase [OS=Saccharomyces cerevisiae S288c]                                   | 851733 | CPR1; YDR155C          | cell differentiation;cell organization and biogenesis;metabolic process;regulation of biological process;transport | cytoplasm;mitochondrion;nucleus          | catalytic activity;RNA binding                                             | 0.233  | 0.52   | 2.23 |  |
| P19955 | 37S ribosomal protein YMR-31, mitochondrial [OS=Saccharomyces cerevisiae S288c]                           | 850610 | YMR31; YFR049W         | cell organization and biogenesis;metabolic process                                                                 | mitochondrion;ribosome                   | catalytic activity;protein binding;structural molecule activity            | 1.154  | 2.594  | 2.25 |  |
| P40502 | Altered inheritance of mitochondria protein 19, mitochondrial [OS=Saccharomyces cerevisiae S288c]         | 854722 | AIM19; YIL087C         |                                                                                                                    | membrane;mitochondrion                   |                                                                            | 0.259  | 0.585  | 2.26 |  |
| P40341 | Mitochondrial respiratory chain complexes assembly protein YTA12 [OS=Saccharomyces cerevisiae S288c]      | 855114 | YTA12; YMR089C         | cell organization and biogenesis;metabolic process;response to stimulus;transport                                  | cytoplasm;membrane;mitochondrion         | catalytic activity;metal ion binding;nucleotide binding;protein binding    | 1.276  | 2.884  | 2.26 |  |
| P40513 | Mitochondrial acidic protein MAM33 [OS=Saccharomyces cerevisiae S288c]                                    | 854740 | MAM33; YIL070C         | metabolic process;regulation of biological process                                                                 | mitochondrion;organelle lumen            | translation regulator activity                                             | 1.61   | 3.642  | 2.26 |  |
| P39522 | Dihydroxy-acid dehydratase,                                                                               | 85347  | ILV3;                  | metabolic process                                                                                                  | mitochondrion                            | catalytic                                                                  | 9.723  | 22.10  | 2.27 |  |



|        |                                                                                                          |         |                    |                                                                                                                           |                                                        |                                                                                 |         |         |      |
|--------|----------------------------------------------------------------------------------------------------------|---------|--------------------|---------------------------------------------------------------------------------------------------------------------------|--------------------------------------------------------|---------------------------------------------------------------------------------|---------|---------|------|
|        | mitochondrial [OS=Saccharomyces cerevisiae S288c]                                                        | 3       | YJR016 C           |                                                                                                                           |                                                        | activity;metal ion binding                                                      |         | 1       |      |
| P48569 | Uncharacterized protein YDL183C [OS=Saccharomyces cerevisiae S288c]                                      | 85134 5 | YDL183 C; YDL183 C | transport                                                                                                                 | mitochondrion                                          |                                                                                 | 0.274   | 0.624   | 2.28 |
| Q12480 | Probable electron transfer flavoprotein subunit alpha, mitochondrial [OS=Saccharomyces cerevisiae S288c] | 85611 2 | AIM45; YPR004 C    | metabolic process;transport                                                                                               | mitochondrion;organelle lumen                          | catalytic activity;nucleotide binding                                           | 1.512   | 3.467   | 2.29 |
| P0CS90 | Heat shock protein SSC1, mitochondrial [OS=Saccharomyces cerevisiae S288c]                               | 85350 3 | SSC1; YJR045 C     | cell organization and biogenesis;metabolic process;regulation of biological process;transport                             | membrane;mitochondrion;nucleus;organelle lumen         | catalytic activity;enzyme regulator activity;nucleotide binding;protein binding | 37.31 2 | 86.99 2 | 2.33 |
| P32787 | Mitochondrial genome maintenance protein MGM101 [OS=Saccharomyces cerevisiae S288c]                      | 85360 9 | MGM1 01; YJR144 W  | cell organization and biogenesis;metabolic process;response to stimulus                                                   | chromosome;mitochondrion                               | DNA binding                                                                     | 1.637   | 3.833   | 2.34 |
| P16622 | Ferrochelatase, mitochondrial [OS=Saccharomyces cerevisiae S288c]                                        | 85434 7 | HEM15 ; YOR17 6W   | metabolic process                                                                                                         | membrane;mitochondrion                                 | catalytic activity                                                              | 3.806   | 9       | 2.36 |
| P19414 | Aconitate hydratase, mitochondrial [OS=Saccharomyces cerevisiae S288c]                                   | 85101 3 | ACO1; YLR304 C     | cell organization and biogenesis;metabolic process;transport                                                              | cytoplasm;cytosol;mitochondrion;organelle lumen        | catalytic activity;DNA binding;metal ion binding                                | 46.19 7 | 109.5 3 | 2.37 |
| P12686 | 37S ribosomal protein MRP13, mitochondrial [OS=Saccharomyces cerevisiae S288c]                           | 85297 5 | MRP13 ; YGR08 4C   | cell organization and biogenesis;metabolic process                                                                        | mitochondrion;ribosome                                 | structural molecule activity                                                    | 0.413   | 0.995   | 2.41 |
| P04840 | Mitochondrial outer membrane protein porin 1 [OS=Saccharomyces cerevisiae S288c]                         | 85566 9 | POR1; YNL055 C     | cell death;cell organization and biogenesis;cellular homeostasis;regulation of biological process;transport               | cytoplasm;membrane;mitochondrion                       | transporter activity                                                            | 13.38 4 | 32.59 8 | 2.44 |
| P17505 | Malate dehydrogenase, mitochondrial [OS=Saccharomyces cerevisiae S288c]                                  | 85377 7 | MDH1; YKL085 W     | metabolic process                                                                                                         | mitochondrion;organelle lumen                          | catalytic activity;protein binding;RNA binding                                  | 32.40 5 | 79.30 9 | 2.45 |
| P32897 | Mitochondrial import inner membrane translocase subunit tim23 [OS=Saccharomyces cerevisiae S288c]        | 85575 1 | TIM23; YNR01 7W    | transport                                                                                                                 | membrane;mitochondrion                                 | protein binding;transporter activity                                            | 2.162   | 5.31    | 2.46 |
| P32266 | Dynammin-like GTPase MGM1, mitochondrial [OS=Saccharomyces cerevisiae S288c]                             | 85438 6 | MGM1; YOR21 1C     | cell organization and biogenesis                                                                                          | membrane;mitochondrion                                 | catalytic activity;nucleotide binding;protein binding                           | 0.228   | 0.572   | 2.51 |
| P00424 | Cytochrome c oxidase polypeptide 5A, mitochondrial [OS=Saccharomyces cerevisiae S288c]                   | 85567 5 | COX5A; YNL052 W    | metabolic process;transport                                                                                               | membrane;mitochondrion                                 | catalytic activity;transporter activity                                         | 0.52    | 1.31    | 2.52 |
| P53163 | 54S ribosomal protein L12, mitochondrial [OS=Saccharomyces cerevisiae S288c]                             | 85281 1 | MNP1; YGL068 W     | cell organization and biogenesis;metabolic process                                                                        | mitochondrion;ribosome                                 | RNA binding;structural molecule activity                                        | 0.52    | 1.31    | 2.52 |
| P28321 | monoglyceride lipase [OS=Saccharomyces cerevisiae S288c]                                                 | 85376 8 | YJU3; YKL094 W     | metabolic process;regulation of biological process                                                                        | cytoplasm;endoplasmic reticulum;membrane;mitochondrion | catalytic activity                                                              | 0.551   | 1.404   | 2.55 |
| P07213 | Mitochondrial import receptor subunit TOM70 [OS=Saccharomyces cerevisiae S288c]                          | 85560 2 | TOM70 ; YNL121 C   | cell organization and biogenesis;transport                                                                                | membrane;mitochondrion                                 | protein binding;transporter activity                                            | 2.665   | 6.897   | 2.59 |
| Q00402 | Nuclear migration protein NUM1 [OS=Saccharomyces cerevisiae S288c]                                       | 85172 7 | NUM1; YDR15 0W     | cell organization and biogenesis;cellular component movement;metabolic process;regulation of biological process;transport | endoplasmic reticulum;mitochondrion                    | catalytic activity;motor activity;protein binding                               | 0.025   | 0.065   | 2.60 |
| P40215 | External NADH-ubiquinone oxidoreductase 1, mitochondrial [OS=Saccharomyces cerevisiae S288c]             | 85517 6 | NDE1; YMR14 5C     | metabolic process                                                                                                         | mitochondrion                                          | catalytic activity;nucleotide binding                                           | 3.453   | 9       | 2.61 |
| P38120 | 37S ribosomal protein S9, mitochondrial [OS=Saccharomyces cerevisiae S288c]                              | 85244 3 | MRP59; YBR146 W    | cell organization and biogenesis;metabolic process                                                                        | mitochondrion;ribosome                                 | RNA binding;structural molecule activity                                        | 0.719   | 1.955   | 2.72 |
| P07246 | Alcohol dehydrogenase 3, mitochondrial [OS=Saccharomyces cerevisiae S288c]                               | 85510 7 | ADH3; YMR08 3W     | metabolic process                                                                                                         | mitochondrion;organelle lumen                          | catalytic activity;metal ion binding                                            | 4.179   | 11.45 2 | 2.74 |
| P36060 | NADH-cytochrome b5 reductase 2 [OS=Saccharomyces cerevisiae S288c]                                       | 85370 7 | MCR1; YKL150 W     | metabolic process;response to stimulus                                                                                    | membrane;mitochondrion                                 | catalytic activity;protein binding                                              | 11.74 3 | 32.59 8 | 2.78 |
| Q06485 | Autophagy-related protein 33 [OS=Saccharomyces cerevisiae S288c]                                         | 85107 0 | ATG33; YLR356 W    | cell communication;metabolic process;response to stimulus                                                                 | membrane;mitochondrion                                 |                                                                                 | 0.778   | 2.162   | 2.78 |
| Q02776 | Mitochondrial import inner membrane translocase subunit TIM50 [OS=Saccharomyces cerevisiae S288c]        | 85604 2 | TIM50; YPL063 W    | cell organization and biogenesis;metabolic process;transport                                                              | membrane;mitochondrion                                 | catalytic activity;protein binding;transporter activity                         | 4.623   | 12.89 5 | 2.79 |
| P39726 | Glycine cleavage system H protein, mitochondrial [OS=Saccharomyces cerevisiae S288c]                     | 85125 4 | GCV3; YAL044 C     | metabolic process                                                                                                         | mitochondrion                                          | catalytic activity                                                              | 1.783   | 4.995   | 2.80 |

|        |                                                                                                                                                      |        |                         |                                                                                                  |                                              |                                                              |        |        |      |
|--------|------------------------------------------------------------------------------------------------------------------------------------------------------|--------|-------------------------|--------------------------------------------------------------------------------------------------|----------------------------------------------|--------------------------------------------------------------|--------|--------|------|
| P25719 | Peptidyl-prolyl cis-trans isomerase C, mitochondrial [OS=Saccharomyces cerevisiae S288c]                                                             | 854897 | CPR3; YML078W           | cell death;metabolic process                                                                     | mitochondrion;organelle lumen                | catalytic activity                                           | 0.848  | 2.415  | 2.85 |
| P25573 | Mitochondrial inner membrane i-AAA protease supercomplex subunit MGR1 [OS=Saccharomyces cerevisiae S288c]                                            | 850313 | MGR1; YCL044C           | metabolic process                                                                                | membrane;mitochondrion                       | protein binding                                              | 0.425  | 1.219  | 2.87 |
| Q02883 | N-acyl-phosphatidylethanolamine-hydrolyzing phospholipase D, mitochondrial [OS=Saccharomyces cerevisiae S288c]                                       | 856001 | FMP30; YPL103C          | metabolic process                                                                                | membrane;mitochondrion                       | catalytic activity;metal ion binding                         | 0.194  | 0.557  | 2.87 |
| Q12428 | Probable 2-methylcitrate dehydratase [OS=Saccharomyces cerevisiae S288c]                                                                             | 856108 | PDH1; YPR002W           | metabolic process                                                                                | cytoplasm;membrane;mitochondrion             | catalytic activity                                           | 4.623  | 13.33  | 2.88 |
| P30624 | Long-chain-fatty-acid--CoA ligase 1 [OS=Saccharomyces cerevisiae S288c]                                                                              | 854495 | FAA1; YOR317W           | metabolic process;transport                                                                      | endoplasmic reticulum;membrane;mitochondrion | catalytic activity;nucleotide binding                        | 3.725  | 10.743 | 2.88 |
| P32340 | Rotenone-insensitive NADH-ubiquinone oxidoreductase, mitochondrial [OS=Saccharomyces cerevisiae S288c]                                               | 854919 | NDI1; YML120C           | metabolic process;regulation of biological process                                               | membrane;mitochondrion;organelle lumen       | catalytic activity;nucleotide binding                        | 12.738 | 37.566 | 2.95 |
| P21560 | Protein CBP3, mitochondrial [OS=Saccharomyces cerevisiae S288c]                                                                                      | 855886 | CBP3; YPL215W           | cell organization and biogenesis;regulation of biological process                                | membrane;mitochondrion;ribosome              |                                                              | 0.557  | 1.649  | 2.96 |
| P40495 | Homoisocitrate dehydrogenase, mitochondrial [OS=Saccharomyces cerevisiae S288c]                                                                      | 854714 | LYS12; YIL094C          | metabolic process                                                                                | mitochondrion                                | catalytic activity;metal ion binding;nucleotide binding      | 2.162  | 6.499  | 3.01 |
| P53252 | sphingolipid long chain base-responsive protein PIL1 [OS=Saccharomyces cerevisiae S288c]                                                             | 852977 | PIL1; YGR086C           | cell organization and biogenesis;regulation of biological process;response to stimulus;transport | cytoplasm;membrane;mitochondrion             | protein binding                                              | 24.809 | 75.27  | 3.03 |
| P38523 | GrpE protein homolog, mitochondrial [OS=Saccharomyces cerevisiae S288c]                                                                              | 854407 | MGE1; YOR232W           | metabolic process;regulation of biological process;transport                                     | membrane;mitochondrion;organelle lumen       | enzyme regulator activity;nucleotide binding;protein binding | 0.274  | 0.833  | 3.04 |
| P43567 | alanine-glyoxylate aminotransferase 1 [OS=Saccharomyces cerevisiae S288c]                                                                            | 850514 | AGX1; YFL030W           | metabolic process                                                                                | cytosol;mitochondrion                        | catalytic activity                                           | 0.616  | 1.873  | 3.04 |
| P19262 | Dihydrolipoyllysine-residue succinyltransferase component of 2-oxoglutarate dehydrogenase complex, mitochondrial [OS=Saccharomyces cerevisiae S288c] | 851726 | KGD2; YDR148C           | cell organization and biogenesis;metabolic process                                               | mitochondrion                                | catalytic activity;protein binding                           | 4.484  | 13.925 | 3.11 |
| P02992 | elongation factor Tu, mitochondrial [OS=Saccharomyces cerevisiae S288c]                                                                              | 854359 | TUF1; YOR187W           | cell organization and biogenesis;metabolic process                                               | mitochondrion                                | catalytic activity;nucleotide binding;RNA binding            | 6.017  | 19.309 | 3.21 |
| Q05892 | MIOREX complex component 2 [OS=Saccharomyces cerevisiae S288c]                                                                                       | 850997 | YLR290C; COQ11; YLR290C | metabolic process                                                                                | mitochondrion                                | catalytic activity                                           | 0.54   | 1.738  | 3.22 |
| P04037 | cytochrome c oxidase subunit 4, mitochondrial [OS=Saccharomyces cerevisiae S288c]                                                                    | 852688 | COX4; YGL187C           | cell organization and biogenesis;metabolic process;transport                                     | membrane;mitochondrion                       | catalytic activity;metal ion binding;transporter activity    | 4.337  | 14.199 | 3.27 |
| P54003 | Protein SUR7 [OS=Saccharomyces cerevisiae S288c]                                                                                                     | 854953 | SUR7; YML052W           | cell differentiation;transport                                                                   | membrane;mitochondrion                       |                                                              | 0.585  | 1.929  | 3.30 |
| P38325 | Mitochondrial outer membrane protein OM14 [OS=Saccharomyces cerevisiae S288c]                                                                        | 852531 | OM14; YBR230C           | transport                                                                                        | membrane;mitochondrion                       |                                                              | 2.728  | 9      | 3.30 |
| P35180 | mitochondrial import receptor subunit Tom20 [OS=Saccharomyces cerevisiae S288c]                                                                      | 852973 | TOM20; YGR082W          | cell organization and biogenesis;transport                                                       | membrane;mitochondrion                       | protein binding;transporter activity                         | 0.425  | 1.424  | 3.35 |
| Q04689 | Altered inheritance of mitochondria protein 32 [OS=Saccharomyces cerevisiae S288c]                                                                   | 854955 | AIM32; YML050W          |                                                                                                  |                                              |                                                              | 0.11   | 0.369  | 3.35 |
| P32419 | Malate dehydrogenase, peroxisomal [OS=Saccharomyces cerevisiae S288c]                                                                                | 851481 | MDH3; YDL078C           | metabolic process                                                                                | organelle lumen                              | catalytic activity;nucleotide binding;RNA binding            | 2.162  | 7.254  | 3.36 |
| P00401 | Cytochrome c oxidase subunit 1 [OS=Saccharomyces cerevisiae S288c]                                                                                   | 854598 | COX1; Q0045             | metabolic process;transport                                                                      | membrane;mitochondrion                       | catalytic activity;metal ion binding;transporter activity    | 0.468  | 1.61   | 3.44 |
| Q03557 | Glutamyl-tRNA(Gln) amidotransferase subunit A, mitochondrial [OS=Saccharomyces cerevisiae S288c]                                                     | 855338 | HER2; YMR293C           | cell organization and biogenesis;metabolic process                                               | mitochondrion                                | catalytic activity;nucleotide binding                        | 0.166  | 0.585  | 3.52 |
| P32316 | acetyl-CoA hydrolase [OS=Saccharomyces cerevisiae S288c]                                                                                             | 852266 | ACH1; YBL015W           | metabolic process                                                                                | cytoplasm;cytosol;mitochondrion              | catalytic activity                                           | 8.326  | 29.539 | 3.55 |
| P46367 | Potassium-activated aldehyde dehydrogenase, mitochondrial [OS=Saccharomyces cerevisiae S288c]                                                        | 854556 | ALD4; YOR374W           | metabolic process                                                                                | mitochondrion;organelle lumen                | catalytic activity                                           | 19.62  | 70.969 | 3.62 |

|        |                                                                                                   |        |                  |                                                              |                                         |                                                                         |         |          |      |
|--------|---------------------------------------------------------------------------------------------------|--------|------------------|--------------------------------------------------------------|-----------------------------------------|-------------------------------------------------------------------------|---------|----------|------|
| P00128 | Cytochrome b-c1 complex subunit 7 [OS=Saccharomyces cerevisiae S288c]                             | 852142 | QCR7; YDR529C    | cell organization and biogenesis;metabolic process;transport | membrane;mitochondrion                  | catalytic activity;transporter activity                                 | 1.783   | 6.743    | 3.78 |
| P25349 | Flavoprotein-like protein YCP4 [OS=Saccharomyces cerevisiae S288c]                                | 850360 | YCP4; YCR004C    | metabolic process;regulation of biological process           | cytoplasm;membrane;mitochondrion        | catalytic activity;nucleotide binding;protein binding                   | 3.084   | 11.915   | 3.86 |
| P25605 | Acetolactate synthase small subunit, mitochondrial [OS=Saccharomyces cerevisiae S288c]            | 850348 | ILV6; YCL009C    | metabolic process;regulation of biological process           | mitochondrion                           | catalytic activity;enzyme regulator activity                            | 1.976   | 7.859    | 3.98 |
| P32891 | D-lactate dehydrogenase [cytochrome] 1, mitochondrial [OS=Saccharomyces cerevisiae S288c]         | 851380 | DLD1; YDL174C    | metabolic process;transport                                  | membrane;mitochondrion                  | catalytic activity;nucleotide binding                                   | 7.161   | 28.552   | 3.99 |
| Q07914 | mitochondrial import inner membrane translocase subunit TIM14 [OS=Saccharomyces cerevisiae S288c] | 850694 | PAM18 ; YLR008C  | regulation of biological process;transport                   | membrane;mitochondrion                  | enzyme regulator activity;protein binding;transporter activity          | 0.334   | 1.371    | 4.10 |
| Q12165 | ATP synthase subunit delta, mitochondrial [OS=Saccharomyces cerevisiae S288c]                     | 851560 | ATP16; YDL004W   | metabolic process;transport                                  | membrane;mitochondrion                  | catalytic activity;transporter activity                                 | 0.334   | 1.371    | 4.10 |
| P21954 | Isocitrate dehydrogenase [NADP], mitochondrial [OS=Saccharomyces cerevisiae S288c]                | 851493 | IDP1; YDL066W    | metabolic process                                            | mitochondrion                           | catalytic activity;metal ion binding;nucleotide binding;protein binding | 11.589  | 49.119   | 4.24 |
| P18900 | hexaprenyl pyrophosphate synthase, mitochondrial [OS=Saccharomyces cerevisiae S288c]              | 852288 | COQ1; YBR003W    | metabolic process                                            | membrane;mitochondrion                  | catalytic activity;metal ion binding;protein binding                    | 0.166   | 0.711    | 4.28 |
| Q06510 | Lysophosphatidylcholine acyltransferase [OS=Saccharomyces cerevisiae S288c]                       | 856262 | TAZ1; YPR140W    | cell organization and biogenesis;metabolic process;transport | membrane;mitochondrion                  | catalytic activity                                                      | 0.093   | 0.425    | 4.57 |
| P38885 | Altered inheritance of mitochondria protein 46, mitochondrial [OS=Saccharomyces cerevisiae S288c] | 856606 | AIM46; YHR199C   |                                                              | mitochondrion                           | catalytic activity                                                      | 0.245   | 1.154    | 4.71 |
| Q06678 | 54S ribosomal protein L35, mitochondrial [OS=Saccharomyces cerevisiae S288c]                      | 851921 | MRPL35; YDR322W  | cell organization and biogenesis;metabolic process           | mitochondrion;ribosome                  | structural molecule activity                                            | 0.304   | 1.649    | 5.42 |
| P07236 | Threonine--tRNA ligase, mitochondrial [OS=Saccharomyces cerevisiae S288c]                         | 853640 | MST1; YKL194C    | metabolic process                                            | cytoplasm;mitochondrion;organelle lumen | catalytic activity;nucleotide binding;RNA binding                       | 0.072   | 0.417    | 5.79 |
| P81449 | ATP synthase subunit e, mitochondrial [OS=Saccharomyces cerevisiae S288c]                         | 851922 | TIM11; YDR322C-A | cell organization and biogenesis;metabolic process;transport | membrane;mitochondrion                  | catalytic activity;structural molecule activity;transporter activity    | 0.334   | 2.162    | 6.47 |
| P22353 | 54S ribosomal protein L8, mitochondrial [OS=Saccharomyces cerevisiae S288c]                       | 853382 | MRPL8; YJL063C   | cell organization and biogenesis;metabolic process           | mitochondrion;ribosome                  | structural molecule activity                                            | 0.166   | 1.154    | 6.95 |
| P16547 | Mitochondrial outer membrane protein OM45 [OS=Saccharomyces cerevisiae S288c]                     | 854670 | OM45; YIL136W    |                                                              | membrane;mitochondrion                  |                                                                         | 274.423 | 2510.886 | 9.15 |

**Supplemental Table S15. The relative concentrations of proteins in mitochondria purified from *ups2Δ* cells cultured with or without LCA.** Mitochondria were purified from *ups2Δ* cells recovered on day 7 of cell culturing with or without LCA. Mass spectrometry-based identification and quantitation of proteins recovered in purified mitochondria were performed as described in Materials and methods. The exponentially modified protein abundance index (emPAI) provided by the "Proteome Discoverer" software was used to calculate the relative abundance of mitochondrial proteins between specified datasets. Data on the relative concentrations of mitochondrial proteins are presented as means of 2 independent experiments.

| Accession | Description                                                                                     | Entre z Gene ID | Gene ID          | Biological Process                                                      | Cellular Component             | Molecular Function                                                             | emP AI <i>ups2</i> | emP AI <i>ups2</i> + LCA | Ratio <i>ups2</i> + LCA / <i>ups2</i> |
|-----------|-------------------------------------------------------------------------------------------------|-----------------|------------------|-------------------------------------------------------------------------|--------------------------------|--------------------------------------------------------------------------------|--------------------|--------------------------|---------------------------------------|
| Q01163    | 37S ribosomal protein S23, mitochondrial [OS=Saccharomyces cerevisiae S288c]                    | 852748          | RSM23; YGL129C   | cell organization and biogenesis;metabolic process                      | mitochondrion;ribosome         | catalytic activity;nucleotide binding;RNA binding;structural molecule activity | 0.751              | 0.133                    | 0.18                                  |
| P00447    | Superoxide dismutase [Mn], mitochondrial [OS=Saccharomyces cerevisiae S288c]                    | 856399          | SOD2; YHR008C    | metabolic process;response to stimulus                                  | mitochondrion;organelle lumen  | antioxidant activity;catalytic activity;metal ion binding                      | 1.894              | 0.701                    | 0.37                                  |
| Q12031    | Mitochondrial 2-methylisocitrate lyase [OS=Saccharomyces cerevisiae S288c]                      | 856114          | ICL2; YPR006C    | metabolic process                                                       | mitochondrion;organelle lumen  | catalytic activity                                                             | 1.976              | 0.833                    | 0.42                                  |
| P40035    | Mitochondrial phosphate carrier protein 2 [OS=Saccharomyces cerevisiae S288c]                   | 856779          | PIC2; YER053C    | cellular homeostasis;metabolic process;transport                        | membrane;mitochondrion         | structural molecule activity;transporter activity                              | 1.976              | 0.833                    | 0.42                                  |
| Q99297    | Mitochondrial 2-oxodicarboxylate carrier 2 [OS=Saccharomyces cerevisiae S288c]                  | 854397          | ODC2; YOR222W    | metabolic process;transport                                             | membrane;mitochondrion         | structural molecule activity;transporter activity                              | 0.778              | 0.334                    | 0.43                                  |
| P32904    | 54S ribosomal protein L6, mitochondrial [OS=Saccharomyces cerevisiae S288c]                     | 856552          | MRPL6; YHR147C   | cell organization and biogenesis;metabolic process                      | mitochondrion;ribosome         | RNA binding;structural molecule activity                                       | 0.778              | 0.334                    | 0.43                                  |
| P17558    | 37S ribosomal protein PET123, mitochondrial [OS=Saccharomyces cerevisiae S288c]                 | 854329          | PET123; YOR158W  | cell organization and biogenesis;metabolic process                      | mitochondrion;ribosome         | structural molecule activity                                                   | 0.668              | 0.292                    | 0.44                                  |
| P49334    | Mitochondrial import receptor subunit tom22 [OS=Saccharomyces cerevisiae S288c]                 | 855592          | TOM22; YNL131W   | cell organization and biogenesis;transport                              | membrane;mitochondrion         | protein binding;transporter activity                                           | 0.668              | 0.292                    | 0.44                                  |
| P33759    | 37S ribosomal protein S5, mitochondrial [OS=Saccharomyces cerevisiae S288c]                     | 852553          | MRP5; YBR251W    | cell organization and biogenesis;metabolic process                      | mitochondrion;ribosome         | RNA binding;structural molecule activity                                       | 0.585              | 0.259                    | 0.44                                  |
| P54857    | lipase 2 [OS=Saccharomyces cerevisiae S288c]                                                    | 851628          | TGL2; YDR058C    | metabolic process;transport                                             | mitochondrion                  | catalytic activity                                                             | 0.52               | 0.233                    | 0.45                                  |
| Q06892    | NADH kinase POSS, mitochondrial [OS=Saccharomyces cerevisiae S288c]                             | 855913          | POSS; YPL188W    | metabolic process;response to stimulus                                  | mitochondrion;organelle lumen  | catalytic activity;nucleotide binding                                          | 0.52               | 0.233                    | 0.45                                  |
| P36141    | Putative redox protein fmp46, mitochondrial [OS=Saccharomyces cerevisiae S288c]                 | 853923          | FMP46; YKR049C   | metabolic process                                                       | mitochondrion                  | catalytic activity;protein binding                                             | 0.52               | 0.233                    | 0.45                                  |
| P40452    | Cytochrome c oxidase assembly factor 1 [OS=Saccharomyces cerevisiae S288c]                      | 854649          | COA1; YIL157C    | cell organization and biogenesis                                        | membrane;mitochondrion         | protein binding                                                                | 0.52               | 0.233                    | 0.45                                  |
| P34224    | Uncharacterized protein YBL059W [OS=Saccharomyces cerevisiae S288c]                             | 852221          | YBL059W; YBL059W |                                                                         | membrane;mitochondrion         |                                                                                | 0.468              | 0.212                    | 0.45                                  |
| P36516    | 54S ribosomal protein L3, mitochondrial [OS=Saccharomyces cerevisiae S288c]                     | 855039          | MRPL3; YMR024W   | cell organization and biogenesis;metabolic process;response to stimulus | mitochondrion;nucleus;ribosome | catalytic activity;RNA binding;structural molecule activity                    | 0.374              | 0.172                    | 0.46                                  |
| P32611    | 54S ribosomal protein RML2, mitochondrial [OS=Saccharomyces cerevisiae S288c]                   | 856660          | RML2; YEL050C    | cell organization and biogenesis;metabolic process                      | mitochondrion;ribosome         | catalytic activity;RNA binding;structural molecule activity                    | 0.389              | 0.179                    | 0.46                                  |
| Q12298    | uncharacterized ABC transporter ATP-binding protein YDR061W [OS=Saccharomyces cerevisiae S288c] | 851633          | YDR061W; YDR061W |                                                                         | mitochondrion                  | catalytic activity;nucleotide binding                                          | 0.266              | 0.125                    | 0.47                                  |
| P38122    | 3-methyl-2-oxobutanoate hydroxymethyltransferase [OS=Saccharomyces cerevisiae S288c]            | 852474          | ECM31; YBR176W   | metabolic process                                                       | mitochondrion                  | catalytic activity                                                             | 0.259              | 0.122                    | 0.47                                  |
| P36528    | 54S ribosomal protein L17, mitochondrial [OS=Saccharomyces cerevisiae S288c]                    | 855469          | MRPL17; YNL252C  | cell organization and biogenesis;metabolic process                      | mitochondrion;ribosome         | structural molecule activity                                                   | 0.233              | 0.11                     | 0.47                                  |
| P51998    | 54S ribosomal protein yml6, mitochondrial [OS=Saccharomyces cerevisiae S288c]                   | 854983          | YML6; YML025C    | cell organization and biogenesis;metabolic process                      | mitochondrion;ribosome         | RNA binding;structural molecule activity                                       | 0.245              | 0.116                    | 0.47                                  |
| Q06510    | Lysophosphatidylcholine acyltransferase [OS=Saccharomyces                                       | 856262          | TAZ1; YPR140     | cell organization and biogenesis;metabolic                              | membrane;mitochondrion         | catalytic activity                                                             | 0.194              | 0.093                    | 0.48                                  |

|        |                                                                                                           |        |                  |                                                                                                             |                                                         |                                                                           |        |        |      |
|--------|-----------------------------------------------------------------------------------------------------------|--------|------------------|-------------------------------------------------------------------------------------------------------------|---------------------------------------------------------|---------------------------------------------------------------------------|--------|--------|------|
|        | cerevisiae S288c]                                                                                         |        | W                | process;transport                                                                                           |                                                         |                                                                           |        |        |      |
| P03879 | Intron-encoded RNA maturase bI4 [OS=Saccharomyces cerevisiae S288c]                                       | 854582 | BI4; Q0120       | metabolic process                                                                                           | membrane;mitochondrion                                  | catalytic activity;RNA binding                                            | 0.179  | 0.086  | 0.48 |
| P40309 | K(+)/H(+) antiporter 1 [OS=Saccharomyces cerevisiae S288c]                                                | 853351 | KHA1; YJL094C    | transport                                                                                                   | endoplasmic reticulum;Golgi;membrane;mitochondrion      | transporter activity                                                      | 0.129  | 0.062  | 0.48 |
| P25038 | Translation initiation factor IF-2, mitochondrial [OS=Saccharomyces cerevisiae S288c]                     | 854135 | IFM1; YOL023W    | cell organization and biogenesis;metabolic process                                                          | mitochondrion;nucleus                                   | catalytic activity;nucleotide binding;RNA binding                         | 0.11   | 0.054  | 0.49 |
| P09440 | C-1-tetrahydrofolate synthase, mitochondrial [OS=Saccharomyces cerevisiae S288c]                          | 852378 | MIS1; YBR084W    | metabolic process                                                                                           | cytosol;mitochondrion                                   | catalytic activity;nucleotide binding                                     | 0.9    | 0.459  | 0.51 |
| Q03976 | 37S ribosomal protein S24, mitochondrial [OS=Saccharomyces cerevisiae S288c]                              | 851755 | RSM24; YDR175C   | cell organization and biogenesis;metabolic process                                                          | mitochondrion;ribosome                                  | structural molecule activity                                              | 0.585  | 0.318  | 0.54 |
| P53969 | Sorting assembly machinery 50 kDa subunit [OS=Saccharomyces cerevisiae S288c]                             | 855705 | SAM50 ; YNL026W  | cell organization and biogenesis;transport                                                                  | membrane;mitochondrion                                  | protein binding;transporter activity                                      | 0.487  | 0.269  | 0.55 |
| P27929 | 37S ribosomal protein NAM9, mitochondrial [OS=Saccharomyces cerevisiae S288c]                             | 855585 | NAM9; YNL137C    | cell organization and biogenesis;metabolic process;regulation of biological process                         | mitochondrion;ribosome                                  | RNA binding;structural molecule activity                                  | 0.389  | 0.218  | 0.56 |
| P40364 | Mitochondrial peculiar membrane protein 1 [OS=Saccharomyces cerevisiae S288c]                             | 853379 | MPM1; YJL066C    |                                                                                                             | membrane;mitochondrion                                  |                                                                           | 1.512  | 0.848  | 0.56 |
| P15179 | Aspartate-tRNA ligase, mitochondrial [OS=Saccharomyces cerevisiae S288c]                                  | 856000 | MSD1; YPL104W    | metabolic process                                                                                           | cytoplasm;mitochondrion;organelle lumen                 | catalytic activity;nucleotide binding                                     | 0.307  | 0.174  | 0.57 |
| P81449 | ATP synthase subunit e, mitochondrial [OS=Saccharomyces cerevisiae S288c]                                 | 851922 | TIM11; YDR322C-A | cell organization and biogenesis;metabolic process;transport                                                | membrane;mitochondrion                                  | catalytic activity;structural molecule activity;transporter activity      | 1.371  | 0.778  | 0.57 |
| P38988 | Mitochondrial GTP/GDP carrier protein 1 [OS=Saccharomyces cerevisiae S288c]                               | 851329 | GGC1; YDL198C    | cell organization and biogenesis;cellular homeostasis;metabolic process;transport                           | membrane;mitochondrion                                  | structural molecule activity;transporter activity                         | 5.449  | 3.16   | 0.58 |
| P39676 | Flavohepomeprotein [OS=Saccharomyces cerevisiae S288c]                                                    | 853149 | YHB1; YGR234W    | metabolic process;response to stimulus                                                                      | cytoplasm;cytosol;mitochondrion;nucleus;organelle lumen | catalytic activity;metal ion binding;protein binding                      | 0.931  | 0.551  | 0.59 |
| P04840 | Mitochondrial outer membrane protein porin 1 [OS=Saccharomyces cerevisiae S288c]                          | 855669 | POR1; YNL055C    | cell death;cell organization and biogenesis;cellular homeostasis;regulation of biological process;transport | cytoplasm;membrane;mitochondrion                        | transporter activity                                                      | 19.691 | 11.743 | 0.60 |
| P48015 | Aminomethyltransferase, mitochondrial [OS=Saccharomyces cerevisiae S288c]                                 | 851582 | GCV1; YDR019C    | metabolic process                                                                                           | mitochondrion                                           | catalytic activity;protein binding                                        | 5.062  | 3.062  | 0.60 |
| P00431 | cytochrome c peroxidase, mitochondrial [OS=Saccharomyces cerevisiae S288c]                                | 853940 | CCP1; YKR066C    | metabolic process;response to stimulus                                                                      | mitochondrion;organelle lumen                           | antioxidant activity;catalytic activity;metal ion binding;protein binding | 0.701  | 0.425  | 0.61 |
| P00942 | Triosephosphate isomerase [OS=Saccharomyces cerevisiae S288c]                                             | 851620 | TP1; YDR050C     | metabolic process                                                                                           | cytoplasm;cytosol;membrane;mitochondrion                | catalytic activity                                                        | 0.701  | 0.425  | 0.61 |
| P40086 | Cytochrome c oxidase assembly protein cox15 [OS=Saccharomyces cerevisiae S288c]                           | 856884 | COX15; YER141W   | cell organization and biogenesis;metabolic process;transport                                                | membrane;mitochondrion                                  | catalytic activity;transporter activity                                   | 1.346  | 0.817  | 0.61 |
| P43616 | Cys-Gly metallopeptidase dug1 [OS=Saccharomyces cerevisiae S288c]                                         | 850605 | DUG1; YFR044C    | metabolic process                                                                                           | cytoplasm;mitochondrion;ribosome                        | catalytic activity;metal ion binding                                      | 0.585  | 0.359  | 0.61 |
| P36525 | 54S ribosomal protein L24, mitochondrial [OS=Saccharomyces cerevisiae S288c]                              | 855231 | MRPL24; YMR193W  | cell organization and biogenesis;metabolic process                                                          | mitochondrion;ribosome                                  | RNA binding;structural molecule activity                                  | 0.585  | 0.359  | 0.61 |
| Q99190 | Very-long-chain enoyl-CoA reductase [OS=Saccharomyces cerevisiae S288c]                                   | 851547 | TSC13; YDL015C   | metabolic process                                                                                           | cytoplasm;endoplasmic reticulum;membrane;mitochondrion  | catalytic activity;protein binding                                        | 0.501  | 0.311  | 0.62 |
| P36151 | Uncharacterized protein YKR070W [OS=Saccharomyces cerevisiae S288c]                                       | 853944 | YKR070W; YKR070W | metabolic process                                                                                           | mitochondrion                                           |                                                                           | 0.438  | 0.274  | 0.63 |
| Q12480 | Probable electron transfer flavoprotein subunit alpha, mitochondrial [OS=Saccharomyces cerevisiae S288c]  | 856112 | AIM45; YPR004C   | metabolic process;transport                                                                                 | mitochondrion;organelle lumen                           | catalytic activity;nucleotide binding                                     | 1.239  | 0.778  | 0.63 |
| P32795 | Mitochondrial inner membrane i-AAA protease supercomplex subunit YME1 [OS=Saccharomyces cerevisiae S288c] | 856135 | YME1; YPR024W    | metabolic process;response to stimulus;transport                                                            | membrane;mitochondrion                                  | catalytic activity;metal ion binding;nucleotide binding;protein binding   | 1.415  | 0.891  | 0.63 |
| P38910 | 10 kDa heat shock protein, mitochondrial [OS=Saccharomyces cerevisiae S288c]                              | 854185 | HSP10; YOR020C   | cell organization and biogenesis;metabolic process;response to stimulus;transport                           | cytoplasm;mitochondrion;organelle lumen                 | metal ion binding;nucleotide binding;protein binding                      | 2.162  | 1.371  | 0.63 |

|        |                                                                                                              |        |                  |                                                                                                  |                                          |                                                            |        |        |      |
|--------|--------------------------------------------------------------------------------------------------------------|--------|------------------|--------------------------------------------------------------------------------------------------|------------------------------------------|------------------------------------------------------------|--------|--------|------|
| Q03430 | 37S ribosomal protein RSM28, mitochondrial [OS=Saccharomyces cerevisiae S288c]                               | 852105 | RSM28; YDR494W   | cell organization and biogenesis;metabolic process                                               | mitochondrion;ribosome                   | structural molecule activity                               | 0.35   | 0.222  | 0.63 |
| P32902 | 37S ribosomal protein MRP4, mitochondrial [OS=Saccharomyces cerevisiae S288c]                                | 856384 | MRP4; YHL004W    | cell organization and biogenesis;metabolic process                                               | mitochondrion;ribosome                   | structural molecule activity                               | 0.334  | 0.212  | 0.63 |
| P32473 | Pyruvate dehydrogenase E1 component subunit beta, mitochondrial [OS=Saccharomyces cerevisiae S288c]          | 852522 | PDB1; YBR221C    | metabolic process                                                                                | mitochondrion;organelle lumen            | catalytic activity                                         | 5.158  | 3.281  | 0.64 |
| P54783 | D-arabinono-1,4-lactone oxidase [OS=Saccharomyces cerevisiae S288c]                                          | 854888 | ALO1; YML086C    | metabolic process;response to stimulus                                                           | membrane;mitochondrion                   | catalytic activity;nucleotide binding                      | 2.981  | 1.929  | 0.65 |
| P33310 | ATP-dependent permease MDL1, mitochondrial [OS=Saccharomyces cerevisiae S288c]                               | 850885 | MDL1; YLR188W    | transport                                                                                        | membrane;mitochondrion                   | catalytic activity;nucleotide binding;transporter activity | 0.528  | 0.354  | 0.67 |
| P39952 | Mitochondrial inner membrane protein OXA1 [OS=Saccharomyces cerevisiae S288c]                                | 856898 | OXA1; YER154W    | cell organization and biogenesis;transport                                                       | membrane;mitochondrion                   | transporter activity                                       | 3.217  | 2.162  | 0.67 |
| P38325 | Mitochondrial outer membrane protein OM14 [OS=Saccharomyces cerevisiae S288c]                                | 852531 | OM14; YBR230C    | transport                                                                                        | membrane;mitochondrion                   |                                                            | 6.197  | 4.179  | 0.67 |
| P00950 | Phosphoglycerate mutase 1 [OS=Saccharomyces cerevisiae S288c]                                                | 853705 | GPM1; YKL152C    | metabolic process;regulation of biological process                                               | cytoplasm;cytosol;membrane;mitochondrion | catalytic activity                                         | 4.412  | 2.981  | 0.68 |
| P00560 | Phosphoglycerate kinase [OS=Saccharomyces cerevisiae S288c]                                                  | 850370 | PGK1; YCR012W    | metabolic process                                                                                | cytoplasm;membrane;mitochondrion         | catalytic activity;nucleotide binding                      | 4.843  | 3.299  | 0.68 |
| P00358 | glyceraldehyde-3-phosphate dehydrogenase 2 [OS=Saccharomyces cerevisiae S288c]                               | 853465 | TDH2; YJR009C    | cell death;metabolic process                                                                     | cytoplasm;cytosol;membrane;mitochondrion | catalytic activity;nucleotide binding;protein binding      | 4.484  | 3.062  | 0.68 |
| P33421 | Succinate dehydrogenase [ubiquinone] cytochrome b subunit, mitochondrial [OS=Saccharomyces cerevisiae S288c] | 853716 | SDH3; YKL141W    | cell organization and biogenesis;metabolic process;transport                                     | membrane;mitochondrion                   | catalytic activity;metal ion binding                       | 0.931  | 0.638  | 0.69 |
| P32332 | Mitochondrial oxaloacetate transport protein [OS=Saccharomyces cerevisiae S288c]                             | 853739 | OAC1; YKL120W    | metabolic process;transport                                                                      | membrane;mitochondrion                   | structural molecule activity;transporter activity          | 2.594  | 1.783  | 0.69 |
| P39726 | Glycine cleavage system H protein, mitochondrial [OS=Saccharomyces cerevisiae S288c]                         | 851254 | GCV3; YAL044C    | metabolic process                                                                                | mitochondrion                            | catalytic activity                                         | 2.594  | 1.783  | 0.69 |
| P25719 | Peptidyl-prolyl cis-trans isomerase C, mitochondrial [OS=Saccharomyces cerevisiae S288c]                     | 854897 | CPR3; YML078W    | cell death;metabolic process                                                                     | mitochondrion;organelle lumen            | catalytic activity                                         | 0.848  | 0.585  | 0.69 |
| Q08179 | Mitochondrial distribution and morphology protein 38 [OS=Saccharomyces cerevisiae S288c]                     | 854130 | MDM38; YOL027C   | cell organization and biogenesis;cellular homeostasis;regulation of biological process;transport | membrane;mitochondrion                   |                                                            | 5.31   | 3.732  | 0.70 |
| P46367 | Potassium-activated aldehyde dehydrogenase, mitochondrial [OS=Saccharomyces cerevisiae S288c]                | 854556 | ALD4; YOR374W    | metabolic process                                                                                | mitochondrion;organelle lumen            | catalytic activity                                         | 19.62  | 13.84  | 0.71 |
| P36534 | 54S ribosomal protein L40, mitochondrial [OS=Saccharomyces cerevisiae S288c]                                 | 855930 | MRPL40; YPL173W  | cell organization and biogenesis;metabolic process                                               | mitochondrion;ribosome                   | protein binding;structural molecule activity               | 0.585  | 0.413  | 0.71 |
| P53736 | Uncharacterized protein YNR040W [OS=Saccharomyces cerevisiae S288c]                                          | 855776 | YNR040W; YNR040W |                                                                                                  | mitochondrion                            |                                                            | 0.551  | 0.389  | 0.71 |
| P49095 | Glycine dehydrogenase (Decarboxylating), mitochondrial [OS=Saccharomyces cerevisiae S288c]                   | 855227 | GCV2; YMR189W    | metabolic process                                                                                | cytosol;mitochondrion                    | catalytic activity                                         | 1.096  | 0.778  | 0.71 |
| P17505 | Malate dehydrogenase, mitochondrial [OS=Saccharomyces cerevisiae S288c]                                      | 853777 | MDH1; YKL085W    | metabolic process                                                                                | mitochondrion;organelle lumen            | catalytic activity;protein binding;RNA binding             | 32.405 | 23.041 | 0.71 |
| P11914 | Mitochondrial-processing peptidase subunit alpha [OS=Saccharomyces cerevisiae S288c]                         | 856419 | MAS2; YHR024C    | metabolic process;transport                                                                      | membrane;mitochondrion;organelle lumen   | catalytic activity;metal ion binding;protein binding       | 0.445  | 0.318  | 0.71 |
| Q04172 | Sensitive to high expression protein 9, mitochondrial [OS=Saccharomyces cerevisiae S288c]                    | 852002 | SHE9; YDR393W    | cell organization and biogenesis                                                                 | membrane;mitochondrion                   |                                                            | 0.374  | 0.269  | 0.72 |
| P32266 | Dynammin-like GTPase MGM1, mitochondrial [OS=Saccharomyces cerevisiae S288c]                                 | 854386 | MGM1; YOR211C    | cell organization and biogenesis                                                                 | membrane;mitochondrion                   | catalytic activity;nucleotide binding;protein binding      | 0.389  | 0.28   | 0.72 |
| P40185 | Protein mmf1, mitochondrial [OS=Saccharomyces cerevisiae S288c]                                              | 854760 | MMF1; YIL051C    | cell organization and biogenesis;metabolic process                                               | mitochondrion;organelle lumen            |                                                            | 2.981  | 2.162  | 0.73 |
| P32191 | Glycerol-3-phosphate dehydrogenase, mitochondrial [OS=Saccharomyces cerevisiae S288c]                        | 854651 | GUT2; YIL155C    | metabolic process                                                                                | membrane;mitochondrion                   | catalytic activity                                         | 4.289  | 3.14   | 0.73 |
| P54003 | Protein SUR7 [OS=Saccharomyces cerevisiae S288c]                                                             | 854953 | SUR7; YML052W    | cell differentiation;transport                                                                   | membrane;mitochondrion                   |                                                            | 1.154  | 0.848  | 0.73 |
| P32860 | NifU-like protein, mitochondrial [OS=Saccharomyces cerevisiae S288c]                                         | 853826 | NFU1; YKL040     | cell organization and biogenesis;cellular                                                        | mitochondrion;organelle lumen            | metal ion binding                                          | 1.054  | 0.778  | 0.74 |

|        |                                                                                                               |        |                        |                                                                                                          |                                                       |                                                                                     |        |        |      |
|--------|---------------------------------------------------------------------------------------------------------------|--------|------------------------|----------------------------------------------------------------------------------------------------------|-------------------------------------------------------|-------------------------------------------------------------------------------------|--------|--------|------|
|        |                                                                                                               |        | C                      | homeostasis;metabolic process                                                                            |                                                       |                                                                                     |        |        |      |
| Q03028 | Mitochondrial 2-oxodicarboxylate carrier 1 [OS=Saccharomyces cerevisiae S288c]                                | 855969 | ODC1; YPL134C          | metabolic process;transport                                                                              | membrane;mitochondrion                                | structural molecule activity;transporter activity                                   | 6.743  | 4.995  | 0.74 |
| P00410 | Cytochrome c oxidase subunit 2 [OS=Saccharomyces cerevisiae S288c]                                            | 854622 | COX2; Q0250            | metabolic process;transport                                                                              | membrane;mitochondrion                                | catalytic activity;metal ion binding;protein binding;transporter activity           | 2.162  | 1.61   | 0.74 |
| Q03798 | Altered inheritance of mitochondria protein 36, mitochondrial [OS=Saccharomyces cerevisiae S288c]             | 855189 | AIM36; YMR157C         |                                                                                                          | membrane;mitochondrion                                |                                                                                     | 0.833  | 0.624  | 0.75 |
| P06168 | ketol-acid reductoisomerase, mitochondrial [OS=Saccharomyces cerevisiae S288c]                                | 851069 | ILV5; YLR355C          | cell organization and biogenesis;metabolic process                                                       | mitochondrion                                         | catalytic activity;DNA binding;metal ion binding                                    | 8.211  | 6.197  | 0.75 |
| P37293 | N-terminal acetyltransferase 2 [OS=Saccharomyces cerevisiae S288c]                                            | 853050 | NAT2; YGR147C          | metabolic process                                                                                        | cytoplasm;mitochondrion                               | catalytic activity                                                                  | 0.73   | 0.551  | 0.75 |
| P28241 | Isocitrate dehydrogenase [NAD] subunit 2, mitochondrial [OS=Saccharomyces cerevisiae S288c]                   | 854303 | IDH2; YOR136W          | metabolic process                                                                                        | mitochondrion;organelle lumen                         | catalytic activity;metal ion binding;nucleotide binding;protein binding;RNA binding | 4.179  | 3.16   | 0.76 |
| P53598 | Succinyl-CoA ligase [ADP-forming] subunit alpha, mitochondrial [OS=Saccharomyces cerevisiae S288c]            | 854310 | LSC1; YOR142W          | metabolic process                                                                                        | cytosol;mitochondrion                                 | catalytic activity;nucleotide binding                                               | 7.859  | 5.952  | 0.76 |
| P40047 | Aldehyde dehydrogenase 5, mitochondrial [OS=Saccharomyces cerevisiae S288c]                                   | 856804 | ALD5; YER073W          | metabolic process                                                                                        | mitochondrion;organelle lumen                         | catalytic activity                                                                  | 1.106  | 0.84   | 0.76 |
| P36101 | tRNA threonylcarbamoyladenine dehydratase 2 [OS=Saccharomyces cerevisiae S288c]                               | 853841 | TCO2; YKL027W; YKL027W | metabolic process                                                                                        | cytosol;membrane;mitochondrion                        | catalytic activity;nucleotide binding                                               | 0.616  | 0.468  | 0.76 |
| P53230 | Phosphatidate cytidyltransferase, mitochondrial [OS=Saccharomyces cerevisiae S288c]                           | 852937 | TAM41; YGR046W         | metabolic process                                                                                        | membrane;mitochondrion;organelle lumen                | catalytic activity                                                                  | 0.532  | 0.407  | 0.77 |
| POCS90 | Heat shock protein SSC1, mitochondrial [OS=Saccharomyces cerevisiae S288c]                                    | 853503 | SSC1; YJR045C          | cell organization and biogenesis;metabolic process;regulation of biological process;transport            | membrane;mitochondrion;nucleus;organelle lumen        | catalytic activity;enzyme regulator activity;nucleotide binding;protein binding     | 25.102 | 19.209 | 0.77 |
| P35191 | DnaJ homolog 1, mitochondrial [OS=Saccharomyces cerevisiae S288c]                                             | 850530 | MDJ1; YFL016C          | cell organization and biogenesis;metabolic process;regulation of biological process;response to stimulus | mitochondrion;organelle lumen                         | enzyme regulator activity;metal ion binding;nucleotide binding;protein binding      | 1.31   | 1.009  | 0.77 |
| P32331 | Carrier protein YMC1, mitochondrial [OS=Saccharomyces cerevisiae S288c]                                       | 856171 | YMC1; YPR058W          | metabolic process;transport                                                                              | membrane;mitochondrion                                | structural molecule activity;transporter activity                                   | 1.254  | 0.968  | 0.77 |
| P47127 | Altered inheritance of mitochondria protein 24, mitochondrial [OS=Saccharomyces cerevisiae S288c]             | 853543 | AIM24; YJR080C         | cell organization and biogenesis                                                                         | mitochondrion                                         |                                                                                     | 1.807  | 1.395  | 0.77 |
| P38071 | Enoyl-[acyl-carrier protein] reductase [NADPH, B-specific], mitochondrial [OS=Saccharomyces cerevisiae S288c] | 852314 | ETR1; YBR026C          | metabolic process                                                                                        | mitochondrion;organelle lumen                         | catalytic activity;DNA binding;metal ion binding                                    | 5.579  | 4.337  | 0.78 |
| P38127 | mitochondrial carrier protein RIM2 [OS=Saccharomyces cerevisiae S288c]                                        | 852491 | RIM2; YBR192W          | cell organization and biogenesis;metabolic process;transport                                             | membrane;mitochondrion                                | structural molecule activity;transporter activity                                   | 0.995  | 0.778  | 0.78 |
| P39522 | Dihydroxy-acid dehydratase, mitochondrial [OS=Saccharomyces cerevisiae S288c]                                 | 853473 | ILV3; YJR016C          | metabolic process                                                                                        | mitochondrion                                         | catalytic activity;metal ion binding                                                | 6.565  | 5.136  | 0.78 |
| Q04458 | Fatty aldehyde dehydrogenase HFD1 [OS=Saccharomyces cerevisiae S288c]                                         | 855137 | HFD1; YMR110C          | metabolic process                                                                                        | endoplasmic reticulum;endosome;membrane;mitochondrion | catalytic activity                                                                  | 2.594  | 2.03   | 0.78 |
| P16387 | Pyruvate dehydrogenase E1 component subunit alpha, mitochondrial [OS=Saccharomyces cerevisiae S288c]          | 856925 | PDA1; YER178W          | cell growth;metabolic process                                                                            | mitochondrion;organelle lumen                         | catalytic activity                                                                  | 11.496 | 9      | 0.78 |
| P40495 | Homoisocitrate dehydrogenase, mitochondrial [OS=Saccharomyces cerevisiae S288c]                               | 854714 | LYS12; YIL094C         | metabolic process                                                                                        | mitochondrion                                         | catalytic activity;metal ion binding;nucleotide binding                             | 4.623  | 3.642  | 0.79 |
| Q08968 | UPF0061 protein FMP40 [OS=Saccharomyces cerevisiae S288c]                                                     | 855879 | FMP40; YPL222W         |                                                                                                          | mitochondrion                                         | protein binding                                                                     | 0.823  | 0.65   | 0.79 |
| P00359 | Glyceraldehyde-3-phosphate dehydrogenase 3 [OS=Saccharomyces cerevisiae S288c]                                | 853106 | TDH3; YGR192C          | cell death;metabolic process                                                                             | cytoplasm;cytosol;membrane;mitochondrion              | catalytic activity;nucleotide binding;RNA binding                                   | 6.406  | 5.062  | 0.79 |
| P43567 | alanine-glyoxylate aminotransferase 1 [OS=Saccharomyces cerevisiae S288c]                                     | 850514 | AGX1; YFL030W          | metabolic process                                                                                        | cytosol;mitochondrion                                 | catalytic activity                                                                  | 0.778  | 0.616  | 0.79 |

|          |                                                                                                                                              |        |                  |                                                                                                          |                                                          |                                                                   |        |        |      |
|----------|----------------------------------------------------------------------------------------------------------------------------------------------|--------|------------------|----------------------------------------------------------------------------------------------------------|----------------------------------------------------------|-------------------------------------------------------------------|--------|--------|------|
| P25605   | Acetolactate synthase small subunit, mitochondrial [OS=Saccharomyces cerevisiae S288c]                                                       | 850348 | ILV6; YCL009C    | metabolic process;regulation of biological process                                                       | mitochondrion                                            | catalytic activity;enzyme regulator activity                      | 1.336  | 1.069  | 0.80 |
| P46681   | D-lactate dehydrogenase [cytochrome] 2, mitochondrial [OS=Saccharomyces cerevisiae S288c]                                                    | 851376 | DLD2; YDL178W    | metabolic process                                                                                        | mitochondrion;organelle lumen                            | catalytic activity;nucleotide binding;protein binding             | 0.562  | 0.45   | 0.80 |
| P47045   | mitochondrial import inner membrane translocase subunit TIM54 [OS=Saccharomyces cerevisiae S288c]                                            | 853392 | TIM54; YJL054W   | cell organization and biogenesis;transport                                                               | cytosol;membrane;mitochondrion                           | transporter activity                                              | 0.54   | 0.433  | 0.80 |
| Q08822   | Probable electron transfer flavoprotein-ubiquinone oxidoreductase, mitochondrial [OS=Saccharomyces cerevisiae S288c]                         | 854538 | CIR2; YOR356W    | metabolic process;transport                                                                              | membrane;mitochondrion                                   | catalytic activity;metal ion binding;nucleotide binding           | 2.481  | 2.014  | 0.81 |
| P08067   | cytochrome b-c1 complex subunit Rieske, mitochondrial [OS=Saccharomyces cerevisiae S288c]                                                    | 856689 | RIP1; YEL024W    | metabolic process;transport                                                                              | membrane;mitochondrion                                   | catalytic activity;metal ion binding;transporter activity         | 16.783 | 13.678 | 0.81 |
| P53292   | 37S ribosomal protein S35, mitochondrial [OS=Saccharomyces cerevisiae S288c]                                                                 | 853075 | MRPS35; YGR165W  | cell organization and biogenesis;metabolic process                                                       | mitochondrion;ribosome                                   | structural molecule activity                                      | 0.905  | 0.738  | 0.82 |
| P19882   | heat shock protein 60, mitochondrial [OS=Saccharomyces cerevisiae S288c]                                                                     | 850963 | HSP60; YLR259C   | cell organization and biogenesis;metabolic process;regulation of biological process;transport            | cytoplasm;cytosol;membrane;mitochondrion;organelle lumen | catalytic activity;DNA binding;nucleotide binding;protein binding | 32.598 | 27.014 | 0.83 |
| Q03327   | Mitochondrial fusion and transport protein Ugo1 [OS=Saccharomyces cerevisiae S288c]                                                          | 852081 | UGO1; YDR470C    | cell organization and biogenesis;metabolic process                                                       | membrane;mitochondrion                                   | protein binding;structural molecule activity                      | 1.031  | 0.859  | 0.83 |
| P12695   | Dihydrolypoyllysine-residue acetyltransferase component of pyruvate dehydrogenase complex, mitochondrial [OS=Saccharomyces cerevisiae S288c] | 855653 | LAT1; YNL071W    | metabolic process                                                                                        | mitochondrion;organelle lumen                            | catalytic activity                                                | 5.404  | 4.52   | 0.84 |
| P40098   | uncharacterized mitochondrial membrane protein FMP10 [OS=Saccharomyces cerevisiae S288c]                                                     | 856931 | FMP10; YER182W   |                                                                                                          | membrane;mitochondrion                                   |                                                                   | 2.36   | 1.976  | 0.84 |
| P00360   | glyceraldehyde-3-phosphate dehydrogenase 1 [OS=Saccharomyces cerevisiae S288c]                                                               | 853395 | TDH1; YJL052W    | metabolic process                                                                                        | cytoplasm;cytosol;membrane;mitochondrion                 | catalytic activity;nucleotide binding                             | 1.462  | 1.228  | 0.84 |
| Q12428   | Probable 2-methylcitrate dehydratase [OS=Saccharomyces cerevisiae S288c]                                                                     | 856108 | PDH1; YPR002W    | metabolic process                                                                                        | cytoplasm;membrane;mitochondrion                         | catalytic activity                                                | 7.058  | 5.978  | 0.85 |
| P53206   | putative cysteine synthase [OS=Saccharomyces cerevisiae S288c]                                                                               | 852895 | YGR012W; YGR012W | metabolic process                                                                                        | mitochondrion                                            | catalytic activity                                                | 1.154  | 0.978  | 0.85 |
| P07213   | Mitochondrial import receptor subunit TOM70 [OS=Saccharomyces cerevisiae S288c]                                                              | 855602 | TOM70; YNL121C   | cell organization and biogenesis;transport                                                               | membrane;mitochondrion                                   | protein binding;transporter activity                              | 3.125  | 2.665  | 0.85 |
| P22136   | ATPase expression protein 2, mitochondrial [OS=Saccharomyces cerevisiae S288c]                                                               | 855325 | AEP2; YMR282C    | metabolic process;regulation of biological process                                                       | mitochondrion                                            | RNA binding                                                       | 0.585  | 0.506  | 0.86 |
| P15424   | ATP-dependent RNA helicase MSS116, mitochondrial [OS=Saccharomyces cerevisiae S288c]                                                         | 851775 | MSS116; YDR194C  | metabolic process;regulation of biological process                                                       | mitochondrion;organelle lumen                            | catalytic activity;nucleotide binding;RNA binding                 | 0.585  | 0.506  | 0.86 |
| P33303   | Succinate/fumarate mitochondrial transporter [OS=Saccharomyces cerevisiae S288c]                                                             | 853558 | SFC1; YJR095W    | metabolic process;transport                                                                              | membrane;mitochondrion                                   | structural molecule activity;transporter activity                 | 9      | 7.799  | 0.87 |
| P43635   | Citrate synthase 3, mitochondrial [OS=Saccharomyces cerevisiae S288c]                                                                        | 856107 | CIT3; YPR001W    | metabolic process                                                                                        | mitochondrion                                            | catalytic activity                                                | 1.783  | 1.555  | 0.87 |
| P49367   | Homoaconitase, mitochondrial [OS=Saccharomyces cerevisiae S288c]                                                                             | 851820 | LYS4; YDR234W    | metabolic process                                                                                        | mitochondrion                                            | catalytic activity;metal ion binding;protein binding              | 0.73   | 0.638  | 0.87 |
| P32796-1 | Carnitine O-acetyltransferase, mitochondrial [OS=Saccharomyces cerevisiae S288c]                                                             | 854965 | CAT2; YML042W    | metabolic process;transport                                                                              | membrane;mitochondrion                                   | catalytic activity                                                | 6.552  | 5.749  | 0.88 |
| P39518   | Long-chain-fatty-acid--CoA ligase 2 [OS=Saccharomyces cerevisiae S288c]                                                                      | 856734 | FAA2; YER015W    | metabolic process;transport                                                                              | cytoplasm;mitochondrion                                  | catalytic activity;nucleotide binding                             | 0.802  | 0.708  | 0.88 |
| P36775   | Lon protease homolog, mitochondrial [OS=Saccharomyces cerevisiae S288c]                                                                      | 852259 | PIM1; YBL022C    | cell organization and biogenesis;metabolic process;regulation of biological process;response to stimulus | cytoplasm;mitochondrion;organelle lumen                  | catalytic activity;DNA binding;nucleotide binding;RNA binding     | 0.402  | 0.359  | 0.89 |
| P19414   | Aconitate hydratase, mitochondrial [OS=Saccharomyces cerevisiae S288c]                                                                       | 851013 | ACO1; YLR304C    | cell organization and biogenesis;metabolic process;transport                                             | cytoplasm;cytosol;mitochondrion;organelle lumen          | catalytic activity;DNA binding;metal ion binding                  | 18.169 | 16.343 | 0.90 |
| Q07500   | External NADH-ubiquinone oxidoreductase 2, mitochondrial [OS=Saccharomyces cerevisiae S288c]                                                 | 851474 | NDE2; YDL085W    | metabolic process                                                                                        | mitochondrion                                            | catalytic activity;nucleotide binding                             | 4.012  | 3.642  | 0.91 |
| P07275   | Delta-1-pyrroline-5-carboxylate dehydrogenase, mitochondrial [OS=Saccharomyces cerevisiae S288c]                                             | 856432 | PUT2; YHR037W    | metabolic process                                                                                        | membrane;mitochondrion;organelle lumen                   | catalytic activity                                                | 2.765  | 2.511  | 0.91 |



|          |                                                                                                                |        |                  |                                                                              |                                       |                                                                                     |         |         |      |
|----------|----------------------------------------------------------------------------------------------------------------|--------|------------------|------------------------------------------------------------------------------|---------------------------------------|-------------------------------------------------------------------------------------|---------|---------|------|
| P37292   | Serine hydroxymethyltransferase, mitochondrial [OS=Saccharomyces cerevisiae S288c]                             | 852565 | SHM1; YBR263W    | metabolic process                                                            | mitochondrion                         | catalytic activity                                                                  | 3.037   | 2.765   | 0.91 |
| P00890   | citrate synthase, mitochondrial [OS=Saccharomyces cerevisiae S288c]                                            | 855732 | CIT1; YNR001C    | metabolic process;transport                                                  | cytosol;mitochondrion;organelle lumen | catalytic activity                                                                  | 14.086  | 12.895  | 0.92 |
| P53312   | Succinyl-CoA ligase [ADP-forming] subunit beta, mitochondrial [OS=Saccharomyces cerevisiae S288c]              | 853159 | LSC2; YGR244C    | metabolic process                                                            | mitochondrion                         | catalytic activity;nucleotide binding                                               | 5.898   | 5.404   | 0.92 |
| P32316   | acetyl-CoA hydrolase [OS=Saccharomyces cerevisiae S288c]                                                       | 852266 | ACH1; YBL015W    | metabolic process                                                            | cytoplasm;cytosol;mitochondrion       | catalytic activity                                                                  | 8.326   | 7.697   | 0.92 |
| P07342   | Acetolactate synthase catalytic subunit, mitochondrial [OS=Saccharomyces cerevisiae S288c]                     | 855135 | ILV2; YMR108W    | metabolic process                                                            | mitochondrion                         | catalytic activity;metal ion binding;nucleotide binding                             | 3.642   | 3.375   | 0.93 |
| Q00711   | Succinate dehydrogenase [ubiquinone] flavoprotein subunit, mitochondrial [OS=Saccharomyces cerevisiae S288c]   | 853709 | SDH1; YKL148C    | metabolic process;transport                                                  | membrane;mitochondrion                | catalytic activity;nucleotide binding;protein binding                               | 5.381   | 5.032   | 0.94 |
| P20967   | 2-oxoglutarate dehydrogenase, mitochondrial [OS=Saccharomyces cerevisiae S288c]                                | 854681 | KGD1; YIL125W    | metabolic process                                                            | cytosol;mitochondrion;organelle lumen | catalytic activity                                                                  | 9.908   | 9.444   | 0.95 |
| P16547   | Mitochondrial outer membrane protein OM45 [OS=Saccharomyces cerevisiae S288c]                                  | 854670 | OM45; YIL136W    |                                                                              | membrane;mitochondrion                |                                                                                     | 330.131 | 330.131 | 1.00 |
| P00830   | ATP synthase subunit beta, mitochondrial [OS=Saccharomyces cerevisiae S288c]                                   | 853585 | ATP2; YJR121W    | metabolic process;transport                                                  | cytosol;membrane;mitochondrion        | catalytic activity;nucleotide binding;protein binding;transporter activity          | 26.123  | 26.123  | 1.00 |
| Q12230   | Sphingolipid long chain base-responsive protein LSP1 [OS=Saccharomyces cerevisiae S288c]                       | 856103 | LSP1; YPL004C    | regulation of biological process;response to stimulus;transport              | cytoplasm;membrane;mitochondrion      |                                                                                     | 62.096  | 62.096  | 1.00 |
| P23641   | mitochondrial phosphate carrier protein [OS=Saccharomyces cerevisiae S288c]                                    | 853540 | MIR1; YJR077C    | metabolic process;transport                                                  | membrane;mitochondrion                | protein binding;structural molecule activity;transporter activity                   | 13.678  | 13.678  | 1.00 |
| P38077   | ATP synthase subunit gamma, mitochondrial [OS=Saccharomyces cerevisiae S288c]                                  | 852327 | ATP3; YBR039W    | metabolic process;transport                                                  | membrane;mitochondrion                | catalytic activity;transporter activity                                             | 12.689  | 12.689  | 1.00 |
| P07143   | Cytochrome c1, heme protein, mitochondrial [OS=Saccharomyces cerevisiae S288c]                                 | 854231 | CYT1; YOR065W    | metabolic process;transport                                                  | cytosol;membrane;mitochondrion        | metal ion binding                                                                   | 16.013  | 16.013  | 1.00 |
| P06208-1 | 2-isopropylmalate synthase [OS=Saccharomyces cerevisiae S288c]                                                 | 855619 | LEU4; YNL104C    | metabolic process                                                            | cytoplasm;mitochondrion               | catalytic activity;protein binding                                                  | 3.125   | 3.125   | 1.00 |
| P25349   | Flavoprotein-like protein YCP4 [OS=Saccharomyces cerevisiae S288c]                                             | 850360 | YCP4; YCR004C    | metabolic process;regulation of biological process                           | cytoplasm;membrane;mitochondrion      | catalytic activity;nucleotide binding;protein binding                               | 9       | 9       | 1.00 |
| P36060   | NADH-cytochrome b5 reductase 2 [OS=Saccharomyces cerevisiae S288c]                                             | 853707 | MCR1; YKL150W    | metabolic process;response to stimulus                                       | membrane;mitochondrion                | catalytic activity;protein binding                                                  | 10.288  | 10.288  | 1.00 |
| P47052   | succinate dehydrogenase [ubiquinone] flavoprotein subunit 2, mitochondrial [OS=Saccharomyces cerevisiae S288c] | 853405 | YJL045W; YJL045W | metabolic process;transport                                                  | membrane;mitochondrion                | catalytic activity;nucleotide binding                                               | 2.065   | 2.065   | 1.00 |
| P28834   | Isocitrate dehydrogenase [NAD] subunit 1, mitochondrial [OS=Saccharomyces cerevisiae S288c]                    | 855691 | IDH1; YNL037C    | metabolic process;transport                                                  | cytosol;mitochondrion;organelle lumen | catalytic activity;metal ion binding;nucleotide binding;protein binding;RNA binding | 3.833   | 3.833   | 1.00 |
| P15108   | ATP-dependent molecular chaperone HSC82 [OS=Saccharomyces cerevisiae S288c]                                    | 855224 | HSC82; YMR186W   | cell organization and biogenesis;metabolic process;response to stimulus      | cytoplasm;membrane;mitochondrion      | catalytic activity;nucleotide binding;protein binding                               | 1.081   | 1.081   | 1.00 |
| P04710   | ADP,ATP carrier protein 1 [OS=Saccharomyces cerevisiae S288c]                                                  | 855078 | AAC1; YMR056C    | metabolic process;transport                                                  | cytosol;membrane;mitochondrion        | structural molecule activity;transporter activity                                   | 6.848   | 6.848   | 1.00 |
| P07246   | Alcohol dehydrogenase 3, mitochondrial [OS=Saccharomyces cerevisiae S288c]                                     | 855107 | ADH3; YMR083W    | metabolic process                                                            | mitochondrion;organelle lumen         | catalytic activity;metal ion binding                                                | 4.179   | 4.179   | 1.00 |
| P36046   | Mitochondrial intermembrane space import and assembly protein 40 [OS=Saccharomyces cerevisiae S288c]           | 853639 | MIA40; YKL195W   | cellular component movement;metabolic process;response to stimulus;transport | membrane;mitochondrion                | catalytic activity;protein binding;transporter activity                             | 2.03    | 2.03    | 1.00 |
| P04037   | cytochrome c oxidase subunit 4, mitochondrial [OS=Saccharomyces cerevisiae S288c]                              | 852688 | COX4; YGL187C    | cell organization and biogenesis;metabolic process;transport                 | membrane;mitochondrion                | catalytic activity;metal ion binding;transporter activity                           | 9       | 9       | 1.00 |
| P40012   | protoporphyrinogen oxidase [OS=Saccharomyces cerevisiae S288c]                                                 | 856733 | HEM14; YER014W   | metabolic process                                                            | membrane;mitochondrion                | catalytic activity                                                                  | 0.947   | 0.947   | 1.00 |
| P40961   | prohibitin-1 [OS=Saccharomyces cerevisiae S288c]                                                               | 853033 | PHB1; YGR132C    | cell organization and biogenesis;metabolic process;regulation of biological  | membrane;mitochondrion                | protein binding                                                                     | 2.793   | 2.793   | 1.00 |

|        |                                                                                                                    |            |                                      | process                                                                                                                        |                                                 |                                                                               |            |            |      |
|--------|--------------------------------------------------------------------------------------------------------------------|------------|--------------------------------------|--------------------------------------------------------------------------------------------------------------------------------|-------------------------------------------------|-------------------------------------------------------------------------------|------------|------------|------|
| P50088 | Stationary phase gene 1 protein [OS=Saccharomyces cerevisiae S288c]                                                | 85315<br>1 | SPG1;<br>YGR23<br>6C                 |                                                                                                                                | endoplasmic<br>reticulum;membrane;mitochondrion |                                                                               | 62.09<br>6 | 62.09<br>6 | 1.00 |
| P53140 | Protein RMD9, mitochondrial [OS=Saccharomyces cerevisiae S288c]                                                    | 85277<br>1 | RMD9;<br>YGL107<br>C                 | cell differentiation;metabolic<br>process;regulation of biological<br>process                                                  | membrane;mitochondrion                          | RNA binding                                                                   | 0.585      | 0.585      | 1.00 |
| P23180 | Probable oxidoreductase AIM17 [OS=Saccharomyces cerevisiae S288c]                                                  | 85636<br>5 | AIM17;<br>YHL021<br>C                | cell organization and<br>biogenesis;metabolic process                                                                          | mitochondrion                                   | catalytic<br>activity;metal ion<br>binding                                    | 1.818      | 1.818      | 1.00 |
| P53721 | Respiratory supercomplex factor 2, mitochondrial [OS=Saccharomyces cerevisiae S288c]                               | 85575<br>2 | RCF2;<br>YNR01<br>8W                 | cell organization and biogenesis                                                                                               | membrane;mitochondrion                          |                                                                               | 7.111      | 7.111      | 1.00 |
| Q12289 | mitochondrial carnitine carrier [OS=Saccharomyces cerevisiae S288c]                                                | 85426<br>7 | CRC1;<br>YOR10<br>OC                 | metabolic process;transport                                                                                                    | membrane;mitochondrion                          | structural molecule<br>activity;transporter<br>activity                       | 1.683      | 1.683      | 1.00 |
| P08466 | mitochondrial nuclease [OS=Saccharomyces cerevisiae S288c]                                                         | 85322<br>2 | NUC1;<br>YJL208<br>C                 | cell death;metabolic process                                                                                                   | membrane;mitochondrion;nucleus                  | catalytic<br>activity;metal ion<br>binding                                    | 1.976      | 1.976      | 1.00 |
| P38626 | NADH-cytochrome b5 reductase 1 [OS=Saccharomyces cerevisiae S288c]                                                 | 85476<br>8 | CBR1;<br>YIL043<br>C                 | metabolic process                                                                                                              | endoplasmic<br>reticulum;membrane;mitochondrion | catalytic activity                                                            | 1.61       | 1.61       | 1.00 |
| P25374 | Cysteine desulfurase, mitochondrial [OS=Saccharomyces cerevisiae S288c]                                            | 85034<br>3 | NFS1;<br>YCL017<br>C                 | cell organization and<br>biogenesis;cellular<br>homeostasis;metabolic process                                                  | mitochondrion;nucleus                           | catalytic<br>activity;metal ion<br>binding;protein<br>binding                 | 0.817      | 0.817      | 1.00 |
| Q08245 | protein ZEO1 [OS=Saccharomyces cerevisiae S288c]                                                                   | 85404<br>0 | ZEO1;<br>YOL109<br>W                 | cell organization and biogenesis                                                                                               | membrane;mitochondrion                          | protein binding                                                               | 5.31       | 5.31       | 1.00 |
| P40416 | Iron-sulfur clusters transporter ATM1, mitochondrial [OS=Saccharomyces cerevisiae S288c]                           | 85534<br>7 | ATM1;<br>YMR30<br>1C                 | cellular homeostasis;metabolic<br>process;transport                                                                            | membrane;mitochondrion                          | catalytic<br>activity;nucleotide<br>binding;transporter<br>activity           | 0.546      | 0.546      | 1.00 |
| P32898 | Mitochondrial presequence protease [OS=Saccharomyces cerevisiae S288c]                                             | 85204<br>1 | CYM1;<br>YDR43<br>OC                 | metabolic process                                                                                                              | mitochondrion                                   | catalytic<br>activity;metal ion<br>binding                                    | 0.297      | 0.297      | 1.00 |
| Q06493 | LETM1 domain-containing protein YLH47, mitochondrial [OS=Saccharomyces cerevisiae S288c]                           | 85624<br>3 | YLH47;<br>YPR125<br>W                | cell organization and<br>biogenesis;transport                                                                                  | membrane;mitochondrion                          |                                                                               | 0.61       | 0.61       | 1.00 |
| P40508 | Uncharacterized protein YIL077C [OS=Saccharomyces cerevisiae S288c]                                                | 85473<br>3 | YIL077<br>C;<br>YIL077<br>C          |                                                                                                                                | mitochondrion                                   |                                                                               | 0.896      | 0.896      | 1.00 |
| P40008 | Protein FMP52, mitochondrial [OS=Saccharomyces cerevisiae S288c]                                                   | 85672<br>1 | FMP52;<br>YER004<br>W                |                                                                                                                                | endoplasmic<br>reticulum;membrane;mitochondrion | catalytic activity                                                            | 1.371      | 1.371      | 1.00 |
| P32317 | Protein AFG1 [OS=Saccharomyces cerevisiae S288c]                                                                   | 85665<br>8 | AFG1;<br>YEL052<br>W                 | cell organization and<br>biogenesis;metabolic<br>process;response to<br>stimulus;transport                                     | membrane;mitochondrion                          | catalytic<br>activity;nucleotide<br>binding                                   | 0.585      | 0.585      | 1.00 |
| P38072 | Protein SCO2, mitochondrial [OS=Saccharomyces cerevisiae S288c]                                                    | 85231<br>2 | SCO2;<br>YBR024<br>W                 | cell organization and<br>biogenesis;cellular<br>homeostasis;metabolic<br>process;transport                                     | membrane;mitochondrion                          | antioxidant<br>activity;catalytic<br>activity;metal ion<br>binding            | 0.73       | 0.73       | 1.00 |
| P28737 | Protein MSP1 [OS=Saccharomyces cerevisiae S288c]                                                                   | 85291<br>5 | MSP1;<br>YGR02<br>8W                 | cell organization and<br>biogenesis;metabolic<br>process;regulation of biological<br>process;response to<br>stimulus;transport | membrane;mitochondrion;nucleus                  | catalytic<br>activity;nucleotide<br>binding;protein<br>binding;RNA<br>binding | 0.778      | 0.778      | 1.00 |
| P10507 | mitochondrial-processing peptidase subunit beta [OS=Saccharomyces cerevisiae S288c]                                | 85086<br>0 | MAS1;<br>YLR163<br>C                 | metabolic process;transport                                                                                                    | mitochondrion;organelle lumen                   | catalytic<br>activity;metal ion<br>binding;protein<br>binding                 | 0.616      | 0.616      | 1.00 |
| P32453 | Protein ATP11, mitochondrial [OS=Saccharomyces cerevisiae S288c]                                                   | 85540<br>1 | ATP11;<br>YNL315<br>C                | cell organization and biogenesis                                                                                               | mitochondrion                                   | protein binding                                                               | 0.585      | 0.585      | 1.00 |
| P37298 | Succinate dehydrogenase [ubiquinone] cytochrome b small subunit, mitochondrial [OS=Saccharomyces cerevisiae S288c] | 85175<br>8 | SDH4;<br>YDR17<br>8W                 | metabolic process;transport                                                                                                    | membrane;mitochondrion                          | catalytic<br>activity;metal ion<br>binding                                    | 1.154      | 1.154      | 1.00 |
| P19955 | 37S ribosomal protein YMR-31, mitochondrial [OS=Saccharomyces cerevisiae S288c]                                    | 85061<br>0 | YMR31<br>;<br>YFR049<br>W            | cell organization and<br>biogenesis;metabolic process                                                                          | mitochondrion;ribosome                          | catalytic<br>activity;protein<br>binding;structural<br>molecule activity      | 2.594      | 2.594      | 1.00 |
| Q08223 | Altered inheritance of mitochondria protein 39, mitochondrial [OS=Saccharomyces cerevisiae S288c]                  | 85410<br>3 | AIM39;<br>YOL053<br>W                |                                                                                                                                | cytosol;membrane;mitochondrion                  |                                                                               | 0.468      | 0.468      | 1.00 |
| P38523 | GrpE protein homolog, mitochondrial [OS=Saccharomyces cerevisiae S288c]                                            | 85440<br>7 | MGE1;<br>YOR23<br>2W                 | metabolic process;regulation of<br>biological process;transport                                                                | membrane;mitochondrion;organelle<br>lumen       | enzyme regulator<br>activity;nucleotide<br>binding;protein<br>binding         | 0.624      | 0.624      | 1.00 |
| Q06567 | ABC1 family protein MCP2 [OS=Saccharomyces cerevisiae S288c]                                                       | 85095<br>5 | YLR253<br>W;<br>MCP2;<br>YLR253<br>W | cell organization and biogenesis                                                                                               | membrane;mitochondrion                          |                                                                               | 0.218      | 0.218      | 1.00 |
| Q05931 | Heat shock protein SSQ1, mitochondrial [OS=Saccharomyces cerevisiae S288c]                                         | 85108<br>4 | SSQ1;<br>YLR369<br>W                 | cell organization and<br>biogenesis;metabolic process                                                                          | mitochondrion;organelle lumen                   | nucleotide<br>binding;protein<br>binding                                      | 0.413      | 0.413      | 1.00 |

|        |                                                                                                    |             |                                           |                                                                                                  |                                         |                                                                             |       |       |      |
|--------|----------------------------------------------------------------------------------------------------|-------------|-------------------------------------------|--------------------------------------------------------------------------------------------------|-----------------------------------------|-----------------------------------------------------------------------------|-------|-------|------|
| Q05892 | MIOREX complex component 2<br>[OS=Saccharomyces cerevisiae S288c]                                  | 85099<br>7  | YLR290<br>C;<br>COQ11;<br>YLR290<br>C     | metabolic process                                                                                | mitochondrion                           | catalytic activity                                                          | 1.054 | 1.054 | 1.00 |
| P39722 | Mitochondrial Rho GTPase 1<br>[OS=Saccharomyces cerevisiae S288c]                                  | 85124<br>9  | GEM1;<br>YAL048<br>C                      | cell organization and biogenesis;regulation of biological process;response to stimulus;transport | membrane;mitochondrion                  | catalytic activity;metal ion binding;nucleotide binding                     | 0.259 | 0.259 | 1.00 |
| Q02950 | 37S ribosomal protein MRP51,<br>mitochondrial [OS=Saccharomyces cerevisiae S288c]                  | 85598<br>5  | MRP51<br>;<br>YPL118<br>W                 | cell organization and biogenesis;metabolic process                                               | mitochondrion;ribosome                  | structural molecule activity                                                | 0.407 | 0.407 | 1.00 |
| P40513 | Mitochondrial acidic protein MAM33<br>[OS=Saccharomyces cerevisiae S288c]                          | 85474<br>0  | MAM3<br>3;<br>YIL070<br>C                 | metabolic process;regulation of biological process                                               | mitochondrion;organelle lumen           | translation regulator activity                                              | 0.778 | 0.778 | 1.00 |
| P25039 | Elongation factor G, mitochondrial<br>[OS=Saccharomyces cerevisiae S288c]                          | 85075<br>8  | MEF1;<br>YLR069<br>C                      | cell organization and biogenesis;metabolic process                                               | cytosol;mitochondrion                   | catalytic activity;nucleotide binding;RNA binding                           | 0.207 | 0.207 | 1.00 |
| P00401 | Cytochrome c oxidase subunit 1<br>[OS=Saccharomyces cerevisiae S288c]                              | 85459<br>8  | COX1;<br>Q0045                            | metabolic process;transport                                                                      | membrane;mitochondrion                  | catalytic activity;metal ion binding;transporter activity                   | 0.778 | 0.778 | 1.00 |
| Q3E824 | Uncharacterized protein YOR020W-A<br>[OS=Saccharomyces cerevisiae S288c]                           | 14664<br>80 | YOR02<br>0W-A;<br>YOR02<br>0W-A           | metabolic process;transport                                                                      | membrane;mitochondrion                  |                                                                             | 2.162 | 2.162 | 1.00 |
| P43617 | Uncharacterized mitochondrial carrier YFR045W [OS=Saccharomyces cerevisiae S288c]                  | 85060<br>6  | YFR045<br>W;<br>YFR045<br>W               | metabolic process;transport                                                                      | membrane;mitochondrion                  | structural molecule activity;transporter activity                           | 0.413 | 0.413 | 1.00 |
| P39006 | Phosphatidylserine decarboxylase proenzyme 1, mitochondrial<br>[OS=Saccharomyces cerevisiae S288c] | 85555<br>2  | PSD1;<br>YNL169<br>C                      | metabolic process;regulation of biological process                                               | membrane;mitochondrion                  | catalytic activity                                                          | 0.269 | 0.269 | 1.00 |
| P38702 | mitochondrial carrier protein LEU5<br>[OS=Saccharomyces cerevisiae S288c]                          | 85639<br>1  | LEU5;<br>YHR00<br>2W                      | metabolic process;transport                                                                      | membrane;mitochondrion                  | structural molecule activity;transporter activity                           | 0.334 | 0.334 | 1.00 |
| P50087 | MICOS subunit MIC26<br>[OS=Saccharomyces cerevisiae S288c]                                         | 85315<br>0  | MOS2;<br>MIC26;<br>YGR23<br>5C            | cell organization and biogenesis                                                                 | membrane;mitochondrion                  |                                                                             | 0.931 | 0.931 | 1.00 |
| Q05648 | MIOREX complex component 10<br>[OS=Saccharomyces cerevisiae S288c]                                 | 85187<br>6  | YDR28<br>2C;<br>MRX10<br>;<br>YDR28<br>2C |                                                                                                  | membrane;mitochondrion                  |                                                                             | 0.35  | 0.35  | 1.00 |
| Q02204 | 54S ribosomal protein L13,<br>mitochondrial [OS=Saccharomyces cerevisiae S288c]                    | 85387<br>5  | MRPL1<br>3;<br>YKR006<br>C                | cell organization and biogenesis;metabolic process                                               | mitochondrion;ribosome                  | structural molecule activity                                                | 0.334 | 0.334 | 1.00 |
| P53881 | 54S ribosomal protein L22,<br>mitochondrial [OS=Saccharomyces cerevisiae S288c]                    | 85554<br>4  | MRPL2<br>2;<br>YNL177<br>C                | cell organization and biogenesis;metabolic process                                               | mitochondrion;ribosome                  | RNA binding;structural molecule activity                                    | 0.389 | 0.389 | 1.00 |
| P32839 | Mitochondrial chaperone BCS1<br>[OS=Saccharomyces cerevisiae S288c]                                | 85198<br>1  | BCS1;<br>YDR37<br>5C                      | cell organization and biogenesis;metabolic process;response to stimulus;transport                | cytosol;membrane;mitochondrion          | catalytic activity;nucleotide binding;transporter activity                  | 0.194 | 0.194 | 1.00 |
| Q08970 | Mitochondrial metal transporter 2<br>[OS=Saccharomyces cerevisiae S288c]                           | 85587<br>7  | MMT2;<br>YPL224<br>C                      | cellular homeostasis;regulation of biological process;response to stimulus;transport             | membrane;mitochondrion                  | transporter activity                                                        | 0.292 | 0.292 | 1.00 |
| Q06485 | Autophagy-related protein 33<br>[OS=Saccharomyces cerevisiae S288c]                                | 85107<br>0  | ATG33;<br>YLR356<br>W                     | cell communication;metabolic process;response to stimulus                                        | membrane;mitochondrion                  |                                                                             | 1.371 | 1.371 | 1.00 |
| Q03246 | 37S ribosomal protein S17,<br>mitochondrial [OS=Saccharomyces cerevisiae S288c]                    | 85522<br>6  | MRPS1<br>7;<br>YMR18<br>8C                | cell differentiation;cell organization and biogenesis;metabolic process                          | mitochondrion;ribosome                  | RNA binding;structural molecule activity                                    | 0.389 | 0.389 | 1.00 |
| P38088 | Glycine-tRNA ligase 1, mitochondrial [OS=Saccharomyces cerevisiae S288c]                           |             |                                           | metabolic process                                                                                | cytoplasm;mitochondrion;organelle lumen | catalytic activity;nucleotide binding;protein binding                       | 0.155 | 0.155 | 1.00 |
| P32387 | 54S ribosomal protein L41,<br>mitochondrial [OS=Saccharomyces cerevisiae S288c]                    | 85201<br>4  | MRP20<br>;<br>YDR40<br>5W                 | cell organization and biogenesis;metabolic process                                               | mitochondrion;ribosome                  | nucleotide binding;protein binding;RNA binding;structural molecule activity | 0.501 | 0.501 | 1.00 |
| P53163 | 54S ribosomal protein L12,<br>mitochondrial [OS=Saccharomyces cerevisiae S288c]                    | 85281<br>1  | MNP1;<br>YGL068<br>W                      | cell organization and biogenesis;metabolic process                                               | mitochondrion;ribosome                  | RNA binding;structural molecule activity                                    | 0.874 | 0.874 | 1.00 |
| P38152 | Tricarboxylate transport protein<br>[OS=Saccharomyces cerevisiae S288c]                            | 85259<br>4  | CTP1;<br>YBR291<br>C                      | metabolic process;transport                                                                      | membrane;mitochondrion                  | structural molecule activity;transporter activity                           | 0.245 | 0.245 | 1.00 |
| P00427 | Cytochrome c oxidase subunit 6,<br>mitochondrial [OS=Saccharomyces cerevisiae S288c]               | 85644<br>8  | COX6;<br>YHR05<br>1W                      | metabolic process;transport                                                                      | membrane;mitochondrion                  | catalytic activity;metal ion binding;transporter activity                   | 0.778 | 0.778 | 1.00 |

|          |                                                                                                            |             |                                  |                                                                         |                                                 |                                                               |       |       |      |
|----------|------------------------------------------------------------------------------------------------------------|-------------|----------------------------------|-------------------------------------------------------------------------|-------------------------------------------------|---------------------------------------------------------------|-------|-------|------|
| P36163   | mitochondrial metalloendopeptidase OMA1 [OS=Saccharomyces cerevisiae S288c]                                | 85396<br>2  | OMA1;<br>YKR087<br>C             | metabolic process                                                       | membrane;mitochondrion                          | catalytic activity;metal ion binding                          | 0.389 | 0.389 | 1.00 |
| Q08818   | Meiotic sister-chromatid recombination protein 6, mitochondrial [OS=Saccharomyces cerevisiae S288c]        | 85453<br>6  | MSC6;<br>YOR35<br>4C             | metabolic process                                                       | mitochondrion;organelle lumen                   | RNA binding                                                   | 0.227 | 0.227 | 1.00 |
| Q96VH5   | MICOS complex subunit Mic10 [OS=Saccharomyces cerevisiae S288c]                                            | 85030<br>0  | MOS1;<br>MIC10;<br>YCL057<br>C-A | cell organization and biogenesis                                        | membrane;mitochondrion                          |                                                               | 0.931 | 0.931 | 1.00 |
| P10834   | protein PET54 [OS=Saccharomyces cerevisiae S288c]                                                          | 85313<br>7  | PET54;<br>YGR22<br>2W            | metabolic process;regulation of biological process                      | membrane;mitochondrion;organelle lumen          | nucleotide binding;RNA binding;translation regulator activity | 0.369 | 0.369 | 1.00 |
| P39515   | mitochondrial import inner membrane translocase subunit Tim17 [OS=Saccharomyces cerevisiae S288c]          | 85329<br>8  | TIM17;<br>YJL143<br>W            | cell organization and biogenesis;transport                              | membrane;mitochondrion                          | protein binding;transporter activity                          | 1.371 | 1.371 | 1.00 |
| P40496   | 37S ribosomal protein S25, mitochondrial [OS=Saccharomyces cerevisiae S288c]                               | 85471<br>5  | RSM25;<br>YIL093<br>C            | cell organization and biogenesis;metabolic process                      | mitochondrion;ribosome                          | structural molecule activity                                  | 0.468 | 0.468 | 1.00 |
| P18900   | hexaprenyl pyrophosphate synthase, mitochondrial [OS=Saccharomyces cerevisiae S288c]                       | 85228<br>8  | COQ1;<br>YBR003<br>W             | metabolic process                                                       | membrane;mitochondrion                          | catalytic activity;metal ion binding;protein binding          | 0.259 | 0.259 | 1.00 |
| Q01532-1 | Cysteine proteinase 1, mitochondrial [OS=Saccharomyces cerevisiae S288c]                                   |             |                                  | metabolic process;regulation of biological process;response to stimulus | cytoplasm;mitochondrion                         | catalytic activity;DNA binding;RNA binding                    | 0.179 | 0.179 | 1.00 |
| P34222   | Peptidyl-tRNA hydrolase 2 [OS=Saccharomyces cerevisiae S288c]                                              | 85222<br>3  | PTH2;<br>YBL057<br>C             | regulation of biological process                                        | cytoplasm;cytosol;membrane;mitochondrion        | catalytic activity;protein binding                            | 0.425 | 0.425 | 1.00 |
| Q06405   | ATP synthase subunit f, mitochondrial [OS=Saccharomyces cerevisiae S288c]                                  | 85198<br>3  | ATP17;<br>YDR37<br>7W            | metabolic process;transport                                             | membrane;mitochondrion                          | catalytic activity;transporter activity                       | 2.981 | 2.981 | 1.00 |
| Q12251   | Uncharacterized mitochondrial carrier YPR011C [OS=Saccharomyces cerevisiae S288c]                          | 85612<br>1  | YPR011<br>C;<br>YPR011<br>C      | metabolic process;transport                                             | membrane;mitochondrion                          | structural molecule activity;transporter activity             | 0.389 | 0.389 | 1.00 |
| P38271   | Protein OPY1 [OS=Saccharomyces cerevisiae S288c]                                                           | 85242<br>6  | OPY1;<br>YBR129<br>C             |                                                                         | cytoplasm;mitochondrion                         |                                                               | 0.274 | 0.274 | 1.00 |
| P36147   | Presequence translocated-associated motor subunit pam17, mitochondrial [OS=Saccharomyces cerevisiae S288c] | 85393<br>9  | PAM17<br>;<br>YKR065<br>C        | transport                                                               | membrane;mitochondrion                          |                                                               | 0.778 | 0.778 | 1.00 |
| Q01976   | ADP-ribose pyrophosphatase [OS=Saccharomyces cerevisiae S288c]                                             | 85240<br>8  | YSA1;<br>YBR111<br>C             | metabolic process                                                       | cytoplasm;mitochondrion;nucleus                 | catalytic activity;metal ion binding                          | 0.194 | 0.194 | 1.00 |
| P36517   | 54S ribosomal protein L4, mitochondrial [OS=Saccharomyces cerevisiae S288c]                                | 85116<br>0  | MRPL4;<br>YLR439<br>W            | cell organization and biogenesis;metabolic process                      | mitochondrion;ribosome                          | structural molecule activity                                  | 0.369 | 0.369 | 1.00 |
| Q05867   | Uncharacterized protein YLR283W, mitochondrial [OS=Saccharomyces cerevisiae S288c]                         | 85098<br>8  | YLR283<br>W;<br>YLR283<br>W      |                                                                         | endoplasmic reticulum;membrane;mitochondrion    |                                                               | 0.11  | 0.11  | 1.00 |
| P00127   | Cytochrome b-c1 complex subunit 6 [OS=Saccharomyces cerevisiae S288c]                                      | 85059<br>3  | QCR6;<br>YFR033<br>C             | metabolic process;transport                                             | membrane;mitochondrion                          | catalytic activity;transporter activity                       | 0.334 | 0.334 | 1.00 |
| P02381   | Ribosomal protein VAR1, mitochondrial [OS=Saccharomyces cerevisiae S288c]                                  | 85458<br>6  | VAR1;<br>Q0140                   | cell organization and biogenesis;metabolic process                      | mitochondrion;ribosome                          | structural molecule activity                                  | 0.11  | 0.11  | 1.00 |
| P40581   | peroxiredoxin HYR1 [OS=Saccharomyces cerevisiae S288c]                                                     | 85485<br>5  | HYR1;<br>YIR037<br>W             | metabolic process;response to stimulus                                  | cytoplasm;cytosol;mitochondrion;organelle lumen | antioxidant activity;catalytic activity                       | 0.259 | 0.259 | 1.00 |
| P30952   | Malate synthase 1, glyoxysomal [OS=Saccharomyces cerevisiae S288c]                                         | 85560<br>6  | MLS1;<br>YNL117<br>W             | metabolic process                                                       | cytoplasm;cytosol;organelle lumen               | catalytic activity;protein binding                            | 0.145 | 0.145 | 1.00 |
| P29704   | squalene synthase [OS=Saccharomyces cerevisiae S288c]                                                      | 85659<br>7  | ERG9;<br>YHR19<br>0W             | metabolic process                                                       | endoplasmic reticulum;membrane;mitochondrion    | catalytic activity                                            | 0.35  | 0.35  | 1.00 |
| P32378   | 4-hydroxybenzoate polyprenyltransferase, mitochondrial [OS=Saccharomyces cerevisiae S288c]                 | 85577<br>8  | COQ2;<br>YNR04<br>1C             | metabolic process;transport                                             | membrane;mitochondrion                          | catalytic activity                                            | 0.292 | 0.292 | 1.00 |
| P14693   | sorting assembly machinery 35 kDa subunit [OS=Saccharomyces cerevisiae S288c]                              | 85648<br>3  | SAM35<br>;<br>YHR08<br>3W        | cell organization and biogenesis;transport                              | membrane;mitochondrion                          | protein binding                                               | 0.334 | 0.334 | 1.00 |
| Q00873   | cytochrome c1 heme lyase [OS=Saccharomyces cerevisiae S288c]                                               | 85377<br>5  | CYT2;<br>YKL087<br>C             | cell organization and biogenesis;metabolic process                      | membrane;mitochondrion                          | catalytic activity;metal ion binding                          | 0.359 | 0.359 | 1.00 |
| P46998   | mitochondrial membrane protein FMP33 [OS=Saccharomyces cerevisiae S288c]                                   | 85327<br>9  | FMP33;<br>YJL161<br>W            |                                                                         | membrane;mitochondrion                          |                                                               | 0.334 | 0.334 | 1.00 |
| P28817   | 3-hydroxyisobutyryl-CoA hydrolase, mitochondrial [OS=Saccharomyces cerevisiae S288c]                       | 85160<br>6  | EHD3;<br>YDR03<br>6C             | metabolic process                                                       | mitochondrion                                   | catalytic activity                                            | 0.172 | 0.172 | 1.00 |
| Q2V2P9   | Uncharacterized protein YDR119W-A [OS=Saccharomyces cerevisiae S288c]                                      | 37999<br>70 | COX26;<br>YDR11<br>9W-A          |                                                                         | membrane;mitochondrion                          |                                                               | 1.154 | 1.154 | 1.00 |

|        |                                                                                                  |        |                      |                                                                                     |                                                 |                                                             |       |       |      |
|--------|--------------------------------------------------------------------------------------------------|--------|----------------------|-------------------------------------------------------------------------------------|-------------------------------------------------|-------------------------------------------------------------|-------|-------|------|
| P36520 | 54S ribosomal protein L10, mitochondrial [OS=Saccharomyces cerevisiae S288c]                     | 855436 | MRPL10; YNL284C      | cell organization and biogenesis;metabolic process                                  | mitochondrion;ribosome                          | structural molecule activity                                | 0.116 | 0.116 | 1.00 |
| P38300 | Inner membrane mitoribosome receptor MBA1, mitochondrial [OS=Saccharomyces cerevisiae S288c]     | 852483 | MBA1; YBR185C        | cell organization and biogenesis;regulation of biological process                   | membrane;mitochondrion                          |                                                             | 0.259 | 0.259 | 1.00 |
| P42847 | 37S ribosomal protein S18, mitochondrial [OS=Saccharomyces cerevisiae S288c]                     | 855410 | MRPS18; YNL306W      | cell organization and biogenesis;metabolic process                                  | mitochondrion;ribosome                          | RNA binding;structural molecule activity                    | 0.155 | 0.155 | 1.00 |
| P36526 | 54S ribosomal protein L27, mitochondrial [OS=Saccharomyces cerevisiae S288c]                     | 852585 | MRPL27; YBR282W      | cell organization and biogenesis;metabolic process                                  | mitochondrion;ribosome                          | structural molecule activity                                | 0.259 | 0.259 | 1.00 |
| P32463 | Acyl carrier protein, mitochondrial [OS=Saccharomyces cerevisiae S288c]                          | 853642 | ACP1; YKL192C        | metabolic process;transport                                                         | mitochondrion                                   |                                                             | 0.259 | 0.259 | 1.00 |
| P40165 | NAD(P)H-hydrate epimerase [OS=Saccharomyces cerevisiae S288c]                                    | 855521 | YNL200C; YNL200C     | metabolic process                                                                   | cytoplasm;mitochondrion                         | catalytic activity;metal ion binding;nucleotide binding     | 0.212 | 0.212 | 1.00 |
| P36523 | 54S ribosomal protein L15, mitochondrial [OS=Saccharomyces cerevisiae S288c]                     | 851022 | MRPL15; YLR312W-A    | cell organization and biogenesis;metabolic process                                  | mitochondrion;ribosome                          | catalytic activity;RNA binding;structural molecule activity | 0.155 | 0.155 | 1.00 |
| P48526 | Isoleucine--tRNA ligase, mitochondrial [OS=Saccharomyces cerevisiae S288c]                       | 856067 | ISM1; YPL040C        | cell organization and biogenesis;metabolic process;regulation of biological process | cytoplasm;cytosol;mitochondrion;organelle lumen | catalytic activity;nucleotide binding                       | 0.04  | 0.04  | 1.00 |
| Q06089 | Uncharacterized mitochondrial outer membrane protein YPR098C [OS=Saccharomyces cerevisiae S288c] | 856213 | YPR098C; YPR098C     |                                                                                     | membrane;mitochondrion                          |                                                             | 2.162 | 2.162 | 1.00 |
| P53320 | Mitochondrial carrier protein MTM1 [OS=Saccharomyces cerevisiae S288c]                           | 853173 | MTM1; YGR257C        | metabolic process;transport                                                         | membrane;mitochondrion                          | structural molecule activity                                | 0.11  | 0.11  | 1.00 |
| P21306 | ATP synthase subunit epsilon, mitochondrial [OS=Saccharomyces cerevisiae S288c]                  | 855857 | ATP15; YPL271W       | metabolic process;transport                                                         | membrane;mitochondrion                          | catalytic activity;transporter activity                     | 0.778 | 0.778 | 1.00 |
| P38909 | cytochrome c mitochondrial import factor CYC2 [OS=Saccharomyces cerevisiae S288c]                | 854202 | CYC2; YOR037W        | cell organization and biogenesis;metabolic process                                  | membrane;mitochondrion                          | catalytic activity                                          | 0.194 | 0.194 | 1.00 |
| P21771 | 37S ribosomal protein S28, mitochondrial [OS=Saccharomyces cerevisiae S288c]                     | 851937 | MRPS28; YDR337W      | cell organization and biogenesis;metabolic process                                  | mitochondrion;ribosome                          | RNA binding;structural molecule activity                    | 0.129 | 0.129 | 1.00 |
| P04039 | Cytochrome c oxidase polypeptide VIII, mitochondrial [OS=Saccharomyces cerevisiae S288c]         | 851111 | COX8; YLR395C        | metabolic process;transport                                                         | membrane;mitochondrion                          | catalytic activity;transporter activity                     | 0.778 | 0.778 | 1.00 |
| Q04623 | Protein ECM18 [OS=Saccharomyces cerevisiae S288c]                                                | 851703 | ECM18; YDR125C       | cell organization and biogenesis                                                    | mitochondrion                                   | catalytic activity                                          | 0.08  | 0.08  | 1.00 |
| P00045 | Cytochrome c iso-2 [OS=Saccharomyces cerevisiae S288c]                                           | 856672 | CYC7; YEL039C        | metabolic process;transport                                                         | mitochondrion                                   | metal ion binding                                           | 0.259 | 0.259 | 1.00 |
| P38797 | Protein phosphatase 2C homolog 7, mitochondrial [OS=Saccharomyces cerevisiae S288c]              | 856475 | PTC7; YHR076W        | metabolic process                                                                   | mitochondrion                                   | catalytic activity;metal ion binding;protein binding        | 0.11  | 0.11  | 1.00 |
| P36064 | COX assembly mitochondrial protein [OS=Saccharomyces cerevisiae S288c]                           | 853721 | CMC1; YKL137W        | cell organization and biogenesis                                                    | membrane;mitochondrion                          | metal ion binding                                           | 0.389 | 0.389 | 1.00 |
| Q02863 | ubiquitin carboxyl-terminal hydrolase 16 [OS=Saccharomyces cerevisiae S288c]                     | 856032 | UBP16; YPL072W       | metabolic process                                                                   | membrane;mitochondrion                          | catalytic activity                                          | 0.072 | 0.072 | 1.00 |
| Q3E776 | Uncharacterized protein YBR255C-A [OS=Saccharomyces cerevisiae S288c]                            | 852558 | YBR255C-A; YBR255C-A |                                                                                     | membrane                                        |                                                             | 0.389 | 0.389 | 1.00 |
| P39103 | Cytochrome c oxidase assembly protein COX14 [OS=Saccharomyces cerevisiae S288c]                  | 854910 | COX14; YML129C       | cell organization and biogenesis;regulation of biological process                   | membrane;mitochondrion;organelle lumen          | protein binding                                             | 0.585 | 0.585 | 1.00 |
| P12687 | 54S ribosomal protein L2, mitochondrial [OS=Saccharomyces cerevisiae S288c]                      | 855727 | MRP7; YNL005C        | cell organization and biogenesis;metabolic process                                  | mitochondrion;ribosome                          | catalytic activity;RNA binding;structural molecule activity | 0.11  | 0.11  | 1.00 |
| P36521 | 54S ribosomal protein L11, mitochondrial [OS=Saccharomyces cerevisiae S288c]                     | 851325 | MRPL11; YDL202W      | cell organization and biogenesis;metabolic process                                  | mitochondrion;ribosome                          | structural molecule activity                                | 0.129 | 0.129 | 1.00 |
| P08456 | CDP-diacylglycerol--serine O-phosphatidyltransferase [OS=Saccharomyces cerevisiae S288c]         | 856748 | CHO1; YER026C        | metabolic process                                                                   | endoplasmic reticulum;membrane;mitochondrion    | catalytic activity;metal ion binding;nucleotide binding     | 0.212 | 0.212 | 1.00 |
| P38120 | 37S ribosomal protein S9, mitochondrial [OS=Saccharomyces cerevisiae S288c]                      | 852443 | MRPS9; YBR146W       | cell organization and biogenesis;metabolic process                                  | mitochondrion;ribosome                          | RNA binding;structural molecule activity                    | 0.145 | 0.145 | 1.00 |
| P07259 | Protein URA2 [OS=Saccharomyces cerevisiae S288c]                                                 | 853311 | URA2; YJL130         | metabolic process;regulation of biological process                                  | cytoplasm;mitochondrion                         | catalytic activity;metal ion                                | 0.016 | 0.016 | 1.00 |

|        |                                                                                                                                                     |            |                                      |                                                                                   |                                                 |                                                                           |            |            |      |
|--------|-----------------------------------------------------------------------------------------------------------------------------------------------------|------------|--------------------------------------|-----------------------------------------------------------------------------------|-------------------------------------------------|---------------------------------------------------------------------------|------------|------------|------|
|        |                                                                                                                                                     |            | C                                    |                                                                                   |                                                 | binding;nucleotide binding                                                |            |            |      |
| P07251 | ATP synthase subunit alpha, mitochondrial [OS=Saccharomyces cerevisiae S288c]                                                                       | 85217<br>7 | ATP1;<br>YBL099<br>W                 | metabolic process;transport                                                       | cytosol;membrane;mitochondrion                  | catalytic activity;nucleotide binding;transporter activity                | 20.54<br>4 | 21.96<br>7 | 1.07 |
| P40341 | Mitochondrial respiratory chain complexes assembly protein YTA12 [OS=Saccharomyces cerevisiae S288c]                                                | 85511<br>4 | YTA12;<br>YMR08<br>9C                | cell organization and biogenesis;metabolic process;response to stimulus;transport | cytoplasm;membrane;mitochondrion                | catalytic activity;metal ion binding;nucleotide binding;protein binding   | 1.276      | 1.371      | 1.07 |
| P40215 | External NADH-ubiquinone oxidoreductase 1, mitochondrial [OS=Saccharomyces cerevisiae S288c]                                                        | 85517<br>6 | NDE1;<br>YMR14<br>5C                 | metabolic process                                                                 | mitochondrion                                   | catalytic activity;nucleotide binding                                     | 3.739      | 4.043      | 1.08 |
| P32454 | Aminopeptidase 2, mitochondrial [OS=Saccharomyces cerevisiae S288c]                                                                                 | 85369<br>9 | APE2;<br>YKL157<br>W                 | metabolic process                                                                 | cytoplasm;extracellular;membrane;mitochondrion  | catalytic activity;metal ion binding                                      | 0.696      | 0.762      | 1.09 |
| P07256 | Cytochrome b-c1 complex subunit 1, mitochondrial [OS=Saccharomyces cerevisiae S288c]                                                                | 85223<br>5 | COR1;<br>YBL045<br>C                 | metabolic process;transport                                                       | membrane;mitochondrion                          | catalytic activity;metal ion binding;protein binding;transporter activity | 7.432      | 8.183      | 1.10 |
| P02992 | elongation factor Tu, mitochondrial [OS=Saccharomyces cerevisiae S288c]                                                                             | 85435<br>9 | TUF1;<br>YOR18<br>7W                 | cell organization and biogenesis;metabolic process                                | mitochondrion                                   | catalytic activity;nucleotide binding;RNA binding                         | 4.38       | 4.878      | 1.11 |
| Q12166 | 2-isopropylmalate synthase 2, mitochondrial [OS=Saccharomyces cerevisiae S288c]                                                                     | 85427<br>5 | LEU9;<br>YOR10<br>8W                 | metabolic process                                                                 | mitochondrion                                   | catalytic activity;protein binding                                        | 1.246      | 1.39       | 1.12 |
| P36013 | NAD-dependent malic enzyme, mitochondrial [OS=Saccharomyces cerevisiae S288c]                                                                       | 85383<br>9 | MAE1;<br>YKL029<br>C                 | metabolic process                                                                 | mitochondrion;organelle lumen                   | catalytic activity;metal ion binding;nucleotide binding                   | 0.995      | 1.113      | 1.12 |
| P19262 | Dihydropolyllysine-residue succinyltransferase component of 2-oxoglutarate dehydrogenase complex, mitochondrial [OS=Saccharomyces cerevisiae S288c] | 85172<br>6 | KGD2;<br>YDR14<br>8C                 | cell organization and biogenesis;metabolic process                                | mitochondrion                                   | catalytic activity;protein binding                                        | 3.062      | 3.489      | 1.14 |
| P38891 | Branched-chain-amino-acid aminotransferase, mitochondrial [OS=Saccharomyces cerevisiae S288c]                                                       | 85661<br>5 | BAT1;<br>YHR20<br>8W                 | metabolic process;regulation of biological process;response to stimulus           | mitochondrion;organelle lumen                   | catalytic activity                                                        | 3.806      | 4.337      | 1.14 |
| Q12482 | Mitochondrial aspartate-glutamate transporter AGC1 [OS=Saccharomyces cerevisiae S288c]                                                              | 85613<br>2 | AGC1;<br>YPR021<br>C                 | metabolic process;transport                                                       | membrane;mitochondrion                          | structural molecule activity;transporter activity                         | 0.407      | 0.468      | 1.15 |
| Q08023 | Protein FMP25, mitochondrial [OS=Saccharomyces cerevisiae S288c]                                                                                    | 85076<br>6 | FMP25;<br>YLR077<br>W                | cell organization and biogenesis                                                  | membrane;mitochondrion                          |                                                                           | 0.84       | 0.968      | 1.15 |
| P09624 | Dihydropolyl dehydrogenase, mitochondrial [OS=Saccharomyces cerevisiae S288c]                                                                       | 85052<br>7 | LPD1;<br>YFL018<br>C                 | cellular homeostasis;metabolic process;regulation of biological process           | mitochondrion;organelle lumen                   | catalytic activity;nucleotide binding                                     | 13.03      | 15.06<br>5 | 1.16 |
| Q04013 | Citrate/oxoglutarate carrier protein [OS=Saccharomyces cerevisiae S288c]                                                                            | 85528<br>2 | YHM2;<br>YMR24<br>1W                 | cell organization and biogenesis;metabolic process;transport                      | membrane;mitochondrion                          | DNA binding;structural molecule activity;transporter activity             | 2.981      | 3.467      | 1.16 |
| Q07349 | MIOREX complex component 9 [OS=Saccharomyces cerevisiae S288c]                                                                                      | 85153<br>5 | YDL027<br>C;<br>MRX9;<br>YDL027<br>C |                                                                                   | endoplasmic reticulum;membrane;mitochondrion    |                                                                           | 1.096      | 1.276      | 1.16 |
| P40053 | Altered inheritance of mitochondria protein 9, mitochondrial [OS=Saccharomyces cerevisiae S288c]                                                    | 85681<br>3 | AIM9;<br>YER080<br>W                 |                                                                                   | mitochondrion                                   |                                                                           | 1.537      | 1.798      | 1.17 |
| P16451 | Pyruvate dehydrogenase complex protein X component, mitochondrial [OS=Saccharomyces cerevisiae S288c]                                               | 85310<br>7 | PDX1;<br>YGR19<br>3C                 | metabolic process                                                                 | mitochondrion;organelle lumen                   | catalytic activity;structural molecule activity                           | 0.978      | 1.154      | 1.18 |
| P36112 | MICOS complex subunit Mic60 [OS=Saccharomyces cerevisiae S288c]                                                                                     | 85388<br>6 | FCJ1;<br>MIC60;<br>YKR016<br>W       | cell organization and biogenesis;transport                                        | membrane;mitochondrion                          |                                                                           | 11.79<br>8 | 14.08<br>6 | 1.19 |
| P25573 | Mitochondrial inner membrane i-AAA protease supercomplex subunit MGR1 [OS=Saccharomyces cerevisiae S288c]                                           | 85031<br>3 | MGR1;<br>YCL044<br>C                 | metabolic process                                                                 | membrane;mitochondrion                          | protein binding                                                           | 0.859      | 1.031      | 1.20 |
| Q07651 | SUR7 family protein FMP45 [OS=Saccharomyces cerevisiae S288c]                                                                                       | 85130<br>4 | FMP45;<br>YDL222<br>C                | cell differentiation;cell organization and biogenesis                             | membrane;mitochondrion                          |                                                                           | 6.017      | 7.377      | 1.23 |
| P08417 | fumarate hydratase, mitochondrial [OS=Saccharomyces cerevisiae S288c]                                                                               | 85586<br>6 | FUM1;<br>YPL262<br>W                 | cell organization and biogenesis;metabolic process                                | cytoplasm;cytosol;mitochondrion;organelle lumen | catalytic activity                                                        | 3.175      | 3.894      | 1.23 |
| Q12374 | Nuclear control of ATPase protein 2 [OS=Saccharomyces cerevisiae S288c]                                                                             | 85627<br>8 | NCA2;<br>YPR155<br>C                 | metabolic process                                                                 | membrane;mitochondrion                          |                                                                           | 0.377      | 0.468      | 1.24 |
| P52893 | probable alanine aminotransferase, mitochondrial [OS=Saccharomyces cerevisiae S288c]                                                                | 85077<br>8 | ALT1;<br>YLR089<br>C                 | metabolic process                                                                 | mitochondrion;organelle lumen                   | catalytic activity                                                        | 0.45       | 0.562      | 1.25 |
| P39925 | Mitochondrial respiratory chain complexes assembly protein AFG3 [OS=Saccharomyces cerevisiae S288c]                                                 | 85673<br>7 | AFG3;<br>YER017<br>C                 | cell organization and biogenesis;metabolic process;response to stimulus;transport | membrane;mitochondrion                          | catalytic activity;metal ion binding;nucleotide binding;protein           | 0.734      | 0.917      | 1.25 |

|        |                                                                                                           |        |                  |                                                                                                                           |                                                                |                                                                           |       |        |      |
|--------|-----------------------------------------------------------------------------------------------------------|--------|------------------|---------------------------------------------------------------------------------------------------------------------------|----------------------------------------------------------------|---------------------------------------------------------------------------|-------|--------|------|
|        |                                                                                                           |        |                  |                                                                                                                           |                                                                | binding                                                                   |       |        |      |
| P32787 | Mitochondrial genome maintenance protein MGM101 [OS=Saccharomyces cerevisiae S288c]                       | 853609 | MGM101; YJR144W  | cell organization and biogenesis;metabolic process;response to stimulus                                                   | chromosome;mitochondrion                                       | DNA binding                                                               | 1.069 | 1.336  | 1.25 |
| P33311 | ATP-dependent permease MDL2, mitochondrial [OS=Saccharomyces cerevisiae S288c]                            | 855858 | MDL2; YPL270W    | response to stimulus;transport                                                                                            | membrane;mitochondrion                                         | catalytic activity;nucleotide binding;transporter activity                | 0.619 | 0.802  | 1.30 |
| P36066 | Protein MRG3-like [OS=Saccharomyces cerevisiae S288c]                                                     | 853725 | YKL133C; YKL133C | metabolic process                                                                                                         | membrane;mitochondrion                                         | protein binding                                                           | 0.334 | 0.433  | 1.30 |
| Q02776 | Mitochondrial import inner membrane translocase subunit TIM50 [OS=Saccharomyces cerevisiae S288c]         | 856042 | TIM50; YPL063W   | cell organization and biogenesis;metabolic process;transport                                                              | membrane;mitochondrion                                         | catalytic activity;protein binding;transporter activity                   | 9.857 | 12.895 | 1.31 |
| Q01852 | Mitochondrial import inner membrane translocase subunit TIM44 [OS=Saccharomyces cerevisiae S288c]         | 854790 | TIM44; YIL022W   | transport                                                                                                                 | membrane;mitochondrion                                         | nucleotide binding;protein binding                                        | 4.125 | 5.404  | 1.31 |
| Q06678 | 54S ribosomal protein L35, mitochondrial [OS=Saccharomyces cerevisiae S288c]                              | 851921 | MRPL35; YDR322W  | cell organization and biogenesis;metabolic process                                                                        | mitochondrion;ribosome                                         | structural molecule activity                                              | 0.425 | 0.557  | 1.31 |
| P07257 | Cytochrome b-c1 complex subunit 2, mitochondrial [OS=Saccharomyces cerevisiae S288c]                      | 856321 | QCR2; YPR191W    | metabolic process;transport                                                                                               | membrane;mitochondrion                                         | catalytic activity;metal ion binding;protein binding;transporter activity | 21.19 | 27.943 | 1.32 |
| P07806 | Valine--tRNA ligase, mitochondrial [OS=Saccharomyces cerevisiae S288c]                                    | 852986 | VAS1; YGR094W    | metabolic process;regulation of biological process                                                                        | cytoplasm;cytosol;mitochondrion                                | catalytic activity;nucleotide binding                                     | 0.251 | 0.334  | 1.33 |
| P00927 | Threonine dehydratase, mitochondrial [OS=Saccharomyces cerevisiae S288c]                                  | 856819 | ILV1; YER086W    | metabolic process                                                                                                         | cytoplasm;mitochondrion                                        | catalytic activity                                                        | 0.604 | 0.805  | 1.33 |
| P33416 | Heat shock protein 78, mitochondrial [OS=Saccharomyces cerevisiae S288c]                                  | 851845 | HSP78; YDR258C   | cell organization and biogenesis;metabolic process;regulation of biological process;response to stimulus                  | mitochondrion;organelle lumen                                  | catalytic activity;nucleotide binding;protein binding                     | 1.569 | 2.103  | 1.34 |
| P53266 | Cytochrome oxidase assembly protein SHY1 [OS=Saccharomyces cerevisiae S288c]                              | 853009 | SHY1; YGR112W    | cell organization and biogenesis                                                                                          | membrane;mitochondrion                                         | protein binding                                                           | 1.154 | 1.555  | 1.35 |
| P00424 | Cytochrome c oxidase polypeptide 5A, mitochondrial [OS=Saccharomyces cerevisiae S288c]                    | 855675 | COX5A; YNL052W   | metabolic process;transport                                                                                               | membrane;mitochondrion                                         | catalytic activity;transporter activity                                   | 1.848 | 2.511  | 1.36 |
| Q00402 | Nuclear migration protein NUM1 [OS=Saccharomyces cerevisiae S288c]                                        | 851727 | NUM1; YDR150W    | cell organization and biogenesis;cellular component movement;metabolic process;regulation of biological process;transport | endoplasmic reticulum;mitochondrion                            | catalytic activity;motor activity;protein binding                         | 0.078 | 0.106  | 1.36 |
| P34227 | Mitochondrial peroxiredoxin PRX1 [OS=Saccharomyces cerevisiae S288c]                                      | 852215 | PRX1; YBL064C    | cellular homeostasis;metabolic process;regulation of biological process;response to stimulus                              | mitochondrion                                                  | antioxidant activity;catalytic activity                                   | 2.793 | 3.833  | 1.37 |
| Q04472 | Mitochondrial inner membrane i-AAA protease supercomplex subunit MGR3 [OS=Saccharomyces cerevisiae S288c] | 855142 | MGR3; YMR115W    | metabolic process                                                                                                         | membrane;mitochondrion                                         | protein binding                                                           | 0.233 | 0.322  | 1.38 |
| P00044 | Cytochrome c iso-1 [OS=Saccharomyces cerevisiae S288c]                                                    | 853507 | CYC1; YJR048W    | metabolic process;transport                                                                                               | mitochondrion                                                  | metal ion binding;protein binding                                         | 4.623 | 6.499  | 1.41 |
| P39525 | 3-oxoacyl-[acyl-carrier-protein] synthase homolog [OS=Saccharomyces cerevisiae S288c]                     | 856790 | CEM1; YER061C    | metabolic process                                                                                                         | mitochondrion                                                  | catalytic activity                                                        | 0.369 | 0.52   | 1.41 |
| P50110 | Sorting assembly machinery 37 kDa subunit [OS=Saccharomyces cerevisiae S288c]                             | 855082 | SAM37; YMR060C   | cell organization and biogenesis;transport                                                                                | membrane;mitochondrion                                         | protein binding                                                           | 0.389 | 0.551  | 1.42 |
| P48569 | Uncharacterized protein YDL183C [OS=Saccharomyces cerevisiae S288c]                                       | 851345 | YDL183C; YDL183C | transport                                                                                                                 | membrane;mitochondrion                                         |                                                                           | 0.438 | 0.624  | 1.42 |
| P16603 | NADPH--cytochrome P450 reductase [OS=Saccharomyces cerevisiae S288c]                                      | 856438 | NCP1; YHR042W    | metabolic process                                                                                                         | cytoplasm;cytosol;endoplasmic reticulum;membrane;mitochondrion | catalytic activity;metal ion binding;nucleotide binding                   | 0.805 | 1.154  | 1.43 |
| Q12029 | Probable mitochondrial transport protein fsf1 [OS=Saccharomyces cerevisiae S288c]                         | 854445 | FSF1; YOR271C    | transport                                                                                                                 | membrane;mitochondrion                                         | transporter activity                                                      | 1.336 | 1.976  | 1.48 |
| P42940 | Probable electron transfer flavoprotein subunit beta [OS=Saccharomyces cerevisiae S288c]                  | 853121 | CIR1; YGR207C    | metabolic process;transport                                                                                               | mitochondrion;organelle lumen                                  |                                                                           | 2.162 | 3.217  | 1.49 |
| P50085 | Prohibitin-2 [OS=Saccharomyces cerevisiae S288c]                                                          | 853146 | PHB2; YGR231C    | cell organization and biogenesis;metabolic process;regulation of biological process                                       | membrane;mitochondrion                                         | protein binding                                                           | 2.899 | 4.337  | 1.50 |
| Q06668 | Methyltransferase OMS1, mitochondrial [OS=Saccharomyces cerevisiae S288c]                                 | 851911 | OMS1; YDR316W    | metabolic process                                                                                                         | membrane;mitochondrion                                         | catalytic activity                                                        | 0.389 | 0.585  | 1.50 |

|        |                                                                                                             |        |                        |                                                                                                                                       |                                                 |                                                            |        |         |      |
|--------|-------------------------------------------------------------------------------------------------------------|--------|------------------------|---------------------------------------------------------------------------------------------------------------------------------------|-------------------------------------------------|------------------------------------------------------------|--------|---------|------|
| P21801 | Succinate dehydrogenase [ubiquinone] iron-sulfur subunit, mitochondrial [OS=Saccharomyces cerevisiae S288c] | 850685 | SDH2; YLL041C          | metabolic process;transport                                                                                                           | membrane;mitochondrion                          | catalytic activity;metal ion binding                       | 16.191 | 24.809  | 1.53 |
| P42900 | Sigma-like sequence protein 1, mitochondrial [OS=Saccharomyces cerevisiae S288c]                            | 850830 | SLS1; YLR139C          | cell organization and biogenesis;metabolic process                                                                                    | membrane;mitochondrion                          | protein binding                                            | 0.125  | 0.194   | 1.55 |
| Q04728 | Arginine biosynthesis bifunctional protein Arg1, mitochondrial [OS=Saccharomyces cerevisiae S288c]          | 855084 | ARG7; YMR062C          | metabolic process                                                                                                                     | mitochondrion;organelle lumen                   | catalytic activity                                         | 0.15   | 0.233   | 1.55 |
| P07236 | Threonine--tRNA ligase, mitochondrial [OS=Saccharomyces cerevisiae S288c]                                   | 853640 | MST1; YKL194C          | metabolic process                                                                                                                     | cytoplasm;mitochondrion;organelle lumen         | catalytic activity;nucleotide binding;RNA binding          | 0.15   | 0.233   | 1.55 |
| P41921 | glutathione reductase [OS=Saccharomyces cerevisiae S288c]                                                   | 856014 | GLR1; YPL091W          | cellular homeostasis;metabolic process;regulation of biological process;response to stimulus                                          | cytoplasm;cytosol;mitochondrion                 | antioxidant activity;catalytic activity;nucleotide binding | 0.155  | 0.241   | 1.55 |
| P54115 | Magnesium-activated aldehyde dehydrogenase, cytosolic [OS=Saccharomyces cerevisiae S288c]                   | 856044 | ALD6; YPL061W          | metabolic process;response to stimulus                                                                                                | cytoplasm;cytosol;mitochondrion                 | catalytic activity                                         | 0.16   | 0.25    | 1.56 |
| P05626 | ATP synthase subunit 4, mitochondrial [OS=Saccharomyces cerevisiae S288c]                                   | 856027 | ATP4; YPL078C          | cell organization and biogenesis;metabolic process;transport                                                                          | membrane;mitochondrion                          | catalytic activity;transporter activity                    | 4.275  | 6.743   | 1.58 |
| P32792 | UPF0744 protein YSC83 [OS=Saccharomyces cerevisiae S288c]                                                   | 856410 | YSC83; YHR017W         |                                                                                                                                       | membrane;mitochondrion                          |                                                            | 0.233  | 0.369   | 1.58 |
| P12686 | 37S ribosomal protein MRP13, mitochondrial [OS=Saccharomyces cerevisiae S288c]                              | 852975 | MRP13; YGR084C         | cell organization and biogenesis;metabolic process                                                                                    | mitochondrion;ribosome                          | structural molecule activity                               | 0.259  | 0.413   | 1.59 |
| P53889 | uncharacterized mitochondrial hydrolase FMP41 [OS=Saccharomyces cerevisiae S288c]                           | 855553 | FMP41; YNL168C         | metabolic process                                                                                                                     | mitochondrion                                   | catalytic activity;metal ion binding                       | 0.311  | 0.501   | 1.61 |
| P38172 | MIOREX complex component 3 [OS=Saccharomyces cerevisiae S288c]                                              | 852181 | YBL095W; MRX3; YBL095W |                                                                                                                                       | membrane;mitochondrion                          |                                                            | 0.311  | 0.501   | 1.61 |
| P53220 | Mitochondrial import inner membrane translocase subunit TIM21 [OS=Saccharomyces cerevisiae S288c]           | 852921 | TIM21; YGR033C         | cell organization and biogenesis;transport                                                                                            | membrane;mitochondrion                          | protein binding                                            | 0.311  | 0.501   | 1.61 |
| Q12375 | mitochondrial ornithine transporter 1 [OS=Saccharomyces cerevisiae S288c]                                   | 854297 | ORT1; YOR130C          | metabolic process;transport                                                                                                           | membrane;mitochondrion                          | structural molecule activity;transporter activity          | 0.334  | 0.54    | 1.62 |
| P16622 | Ferrochelatase, mitochondrial [OS=Saccharomyces cerevisiae S288c]                                           | 854347 | HEM15; YOR176W         | metabolic process                                                                                                                     | membrane;mitochondrion                          | catalytic activity                                         | 4.926  | 8.006   | 1.63 |
| P32939 | GTP-binding protein ypt7 [OS=Saccharomyces cerevisiae S288c]                                                | 855012 | YPT7; YML001W          | cell communication;cell organization and biogenesis;metabolic process;regulation of biological process;response to stimulus;transport | cytosol;endosome;membrane;mitochondrion;vacuole | catalytic activity;nucleotide binding;protein binding      | 0.359  | 0.585   | 1.63 |
| P32340 | Rotenone-insensitive NADH-ubiquinone oxidoreductase, mitochondrial [OS=Saccharomyces cerevisiae S288c]      | 854919 | NDI1; YML120C          | metabolic process;regulation of biological process                                                                                    | membrane;mitochondrion;organelle lumen          | catalytic activity;nucleotide binding                      | 10.721 | 17.874  | 1.67 |
| P32335 | Protein MSS51, mitochondrial [OS=Saccharomyces cerevisiae S288c]                                            | 850900 | MSS51; YLR203C         | metabolic process;regulation of biological process                                                                                    | membrane;mitochondrion                          | protein binding;translation regulator activity             | 1.154  | 1.929   | 1.67 |
| Q06143 | mitochondrial dicarboxylate transporter [OS=Saccharomyces cerevisiae S288c]                                 | 851063 | DIC1; YLR348C          | metabolic process;transport                                                                                                           | membrane;mitochondrion                          | structural molecule activity;transporter activity          | 0.551  | 0.931   | 1.69 |
| P18239 | ADP,ATP carrier protein 2 [OS=Saccharomyces cerevisiae S288c]                                               | 852250 | PET9; YBL030C          | cell death;metabolic process;transport                                                                                                | membrane;mitochondrion                          | structural molecule activity;transporter activity          | 89.063 | 150.991 | 1.70 |
| Q03713 | Respiratory supercomplex factor 1, mitochondrial [OS=Saccharomyces cerevisiae S288c]                        | 854978 | RCF1; YML030W          | cell organization and biogenesis                                                                                                      | membrane;mitochondrion                          |                                                            | 0.585  | 0.995   | 1.70 |
| P23644 | Mitochondrial import receptor subunit TOM40 [OS=Saccharomyces cerevisiae S288c]                             | 855243 | TOM40; YMR203W         | transport                                                                                                                             | cytosol;membrane;mitochondrion                  | protein binding;transporter activity                       | 0.668  | 1.154   | 1.73 |
| P32445 | Single-stranded DNA-binding protein RIM1, mitochondrial [OS=Saccharomyces cerevisiae S288c]                 | 850395 | RIM1; YCR028C-A        | cell organization and biogenesis;metabolic process;regulation of biological process                                                   | mitochondrion                                   | DNA binding                                                | 0.668  | 1.154   | 1.73 |
| P32843 | Mitochondrial escape protein 2 [OS=Saccharomyces cerevisiae S288c]                                          | 855348 | YME2; YMR302C          | cell organization and biogenesis;metabolic process                                                                                    | membrane;mitochondrion                          | nucleotide binding;RNA binding                             | 2.099  | 3.642   | 1.74 |
| P53326 | Uncharacterized protein YGR266W [OS=Saccharomyces cerevisiae S288c]                                         | 853182 | YGR266W; YGR266W       |                                                                                                                                       | membrane;mitochondrion                          |                                                            | 0.299  | 0.52    | 1.74 |
| P38825 | Protein TOM71 [OS=Saccharomyces cerevisiae S288c]                                                           | 856517 | TOM71; YHR117W         | transport                                                                                                                             | membrane;mitochondrion                          | protein binding;transporter activity                       | 0.343  | 0.604   | 1.76 |



|        |                                                                                                                |            |                                 |                                                                                     |                                                        |                                                                                        |            |            |      |
|--------|----------------------------------------------------------------------------------------------------------------|------------|---------------------------------|-------------------------------------------------------------------------------------|--------------------------------------------------------|----------------------------------------------------------------------------------------|------------|------------|------|
| Q12233 | ATP synthase subunit g, mitochondrial [OS=Saccharomyces cerevisiae S288c]                                      | 85613<br>1 | ATP20;<br>YPR020<br>W           | cell organization and biogenesis;metabolic process;transport                        | membrane;mitochondrion                                 | catalytic activity;transporter activity                                                | 0.778      | 1.371      | 1.76 |
| P27697 | Atypical kinase COQ8, mitochondrial [OS=Saccharomyces cerevisiae S288c]                                        | 85275<br>8 | COQ8;<br>YGL119<br>W            | metabolic process                                                                   | membrane;mitochondrion;organelle lumen                 | catalytic activity;nucleotide binding                                                  | 0.365      | 0.645      | 1.77 |
| P37299 | cytochrome b-c1 complex subunit 10 [OS=Saccharomyces cerevisiae S288c]                                         | 85639<br>0 | QCR10;<br>YHR00<br>1W-A         | metabolic process;transport                                                         | membrane;mitochondrion                                 | catalytic activity;transporter activity                                                | 2.981      | 5.31       | 1.78 |
| P09457 | ATP synthase subunit 5, mitochondrial [OS=Saccharomyces cerevisiae S288c]                                      | 85189<br>2 | ATP5;<br>YDR29<br>8C            | metabolic process;transport                                                         | membrane;mitochondrion                                 | catalytic activity;transporter activity                                                | 5.813      | 10.36<br>5 | 1.78 |
| Q02883 | N-acyl-phosphatidylethanolamine-hydrolyzing phospholipase D, mitochondrial [OS=Saccharomyces cerevisiae S288c] | 85600<br>1 | FMP30;<br>YPL103<br>C           | metabolic process                                                                   | membrane;mitochondrion                                 | catalytic activity;metal ion binding                                                   | 0.304      | 0.557      | 1.83 |
| P32891 | D-lactate dehydrogenase [cytochrome] 1, mitochondrial [OS=Saccharomyces cerevisiae S288c]                      | 85138<br>0 | DLD1;<br>YDL174<br>C            | metabolic process;transport                                                         | membrane;mitochondrion                                 | catalytic activity;nucleotide binding                                                  | 5.661      | 10.45      | 1.85 |
| P25087 | Sterol 24-C-methyltransferase [OS=Saccharomyces cerevisiae S288c]                                              | 85500<br>3 | ERG6;<br>YML00<br>8C            | metabolic process                                                                   | endoplasmic reticulum;membrane;mitochondrion           | catalytic activity                                                                     | 1.649      | 3.125      | 1.90 |
| P21954 | Isocitrate dehydrogenase [NADP], mitochondrial [OS=Saccharomyces cerevisiae S288c]                             | 85149<br>3 | IDP1;<br>YDL066<br>W            | metabolic process                                                                   | mitochondrion                                          | catalytic activity;metal ion binding;nucleotide binding;protein binding                | 11.58<br>9 | 22.26<br>3 | 1.92 |
| P38771 | Ribosome-recycling factor, mitochondrial [OS=Saccharomyces cerevisiae S288c]                                   | 85643<br>3 | RRF1;<br>YHR03<br>8W            | cell organization and biogenesis;metabolic process                                  | mitochondrion                                          | RNA binding                                                                            | 0.501      | 0.968      | 1.93 |
| P40471 | NADPH-dependent 1-acyldihydroxyacetone phosphate reductase [OS=Saccharomyces cerevisiae S288c]                 | 85468<br>2 | AYR1;<br>YIL124<br>W            | metabolic process                                                                   | cytoplasm;endoplasmic reticulum;membrane;mitochondrion | catalytic activity                                                                     | 0.778      | 1.512      | 1.94 |
| P21375 | Fumarate reductase 2 [OS=Saccharomyces cerevisiae S288c]                                                       | 85351<br>0 | OSM1;<br>YIR051<br>W            | metabolic process                                                                   | endoplasmic reticulum;mitochondrion                    | catalytic activity;nucleotide binding                                                  | 0.346      | 0.682      | 1.97 |
| P07253 | cytochrome B pre-mRNA-processing protein 6 [OS=Saccharomyces cerevisiae S288c]                                 | 85241<br>7 | CBP6;<br>YBR120<br>C            | cell organization and biogenesis;metabolic process;regulation of biological process | mitochondrion;ribosome                                 |                                                                                        | 0.638      | 1.276      | 2.00 |
| P00128 | Cytochrome b-c1 complex subunit 7 [OS=Saccharomyces cerevisiae S288c]                                          | 85214<br>2 | QCR7;<br>YDR52<br>9C            | cell organization and biogenesis;metabolic process;transport                        | membrane;mitochondrion                                 | catalytic activity;transporter activity                                                | 1.783      | 3.642      | 2.04 |
| P41911 | Glycerol-3-phosphate dehydrogenase [NAD(+)] 2, mitochondrial [OS=Saccharomyces cerevisiae S288c]               | 85409<br>5 | GPD2;<br>YOL059<br>W            | metabolic process                                                                   | cytoplasm;cytosol;mitochondrion                        | catalytic activity;nucleotide binding;protein binding                                  | 0.089      | 0.186      | 2.09 |
| P10662 | 37S ribosomal protein MRP1, mitochondrial [OS=Saccharomyces cerevisiae S288c]                                  | 85194<br>8 | MRP1;<br>YDR34<br>7W            | cell organization and biogenesis;metabolic process;response to stimulus             | mitochondrion;ribosome                                 | antioxidant activity;catalytic activity;metal ion binding;structural molecule activity | 0.585      | 1.239      | 2.12 |
| Q02486 | ARS-binding factor 2, mitochondrial [OS=Saccharomyces cerevisiae S288c]                                        | 85509<br>4 | ABF2;<br>YMR07<br>2W            | cell organization and biogenesis;metabolic process;regulation of biological process | chromosome;mitochondrion;nucleus                       | DNA binding                                                                            | 10.93<br>8 | 23.24<br>5 | 2.13 |
| P38297 | Mitofusin FZO1 [OS=Saccharomyces cerevisiae S288c]                                                             | 85247<br>7 | FZO1;<br>YBR179<br>C            | cell organization and biogenesis                                                    | membrane;mitochondrion                                 | catalytic activity;nucleotide binding;protein binding                                  | 0.142      | 0.304      | 2.14 |
| Q08926 | ULP1-interacting protein 4 [OS=Saccharomyces cerevisiae S288c]                                                 | 85591<br>6 | UIP4;<br>YPL186<br>C            |                                                                                     | endoplasmic reticulum;membrane;mitochondrion;nucleus   |                                                                                        | 0.136      | 0.292      | 2.15 |
| P43603 | LAS seventeen-binding protein 3 [OS=Saccharomyces cerevisiae S288c]                                            | 85058<br>0 | LSB3;<br>YFR024<br>C-A          | cell organization and biogenesis;regulation of biological process                   | cytoplasm;mitochondrion                                | protein binding                                                                        | 0.186      | 0.407      | 2.19 |
| P38079 | protein YRO2 [OS=Saccharomyces cerevisiae S288c]                                                               | 85234<br>3 | YRO2;<br>YBR054<br>W            | transport                                                                           | endoplasmic reticulum;membrane;mitochondrion           | transporter activity                                                                   | 1.424      | 3.125      | 2.19 |
| P40015 | inositol phosphosphingolipids phospholipase C [OS=Saccharomyces cerevisiae S288c]                              | 85673<br>9 | ISC1;<br>YER019<br>W            | metabolic process;response to stimulus                                              | endoplasmic reticulum;membrane;mitochondrion           | catalytic activity;metal ion binding                                                   | 0.212      | 0.468      | 2.21 |
| P38969 | Pentamidine resistance factor, mitochondrial [OS=Saccharomyces cerevisiae S288c]                               | 85444<br>0 | PNT1;<br>YOR26<br>6W            | cell organization and biogenesis;response to stimulus                               | membrane;mitochondrion                                 |                                                                                        | 0.259      | 0.585      | 2.26 |
| P40502 | Altered inheritance of mitochondria protein 19, mitochondrial [OS=Saccharomyces cerevisiae S288c]              | 85472<br>2 | AIM19;<br>YIL087<br>C           |                                                                                     | membrane;mitochondrion                                 |                                                                                        | 0.259      | 0.585      | 2.26 |
| P28625 | Protein YIM1 [OS=Saccharomyces cerevisiae S288c]                                                               | 85518<br>3 | YIM1;<br>YMR15<br>2W            | metabolic process;response to stimulus                                              | cytoplasm;endoplasmic reticulum;mitochondrion          | catalytic activity;metal ion binding                                                   | 0.274      | 0.624      | 2.28 |
| P50945 | MICOS complex subunit MIC27 [OS=Saccharomyces cerevisiae S288c]                                                | 85562<br>3 | AIM37;<br>MIC27;<br>YNL100<br>W | cell organization and biogenesis                                                    | membrane;mitochondrion                                 |                                                                                        | 0.311      | 0.719      | 2.31 |
| Q07914 | mitochondrial import inner membrane translocase subunit TIM14 [OS=Saccharomyces cerevisiae S288c]              | 85069<br>4 | PAM18<br>;<br>YLR008<br>C       | regulation of biological process;transport                                          | membrane;mitochondrion                                 | enzyme regulator activity;protein binding;transporter activity                         | 0.334      | 0.778      | 2.33 |

|        |                                                                                                   |            |                                      |                                                                                               |                                                               |                                                                     |       |            |      |
|--------|---------------------------------------------------------------------------------------------------|------------|--------------------------------------|-----------------------------------------------------------------------------------------------|---------------------------------------------------------------|---------------------------------------------------------------------|-------|------------|------|
| P21560 | Protein CBP3, mitochondrial [OS=Saccharomyces cerevisiae S288c]                                   | 85588<br>6 | CBP3;<br>YPL215<br>W                 | cell organization and biogenesis;regulation of biological process                             | membrane;mitochondrion;ribosome                               |                                                                     | 0.701 | 1.649      | 2.35 |
| Q03104 | Meiotic sister chromatid recombination protein 1 [OS=Saccharomyces cerevisiae S288c]              | 85491<br>1 | MSC1;<br>YML12<br>8C                 | metabolic process                                                                             | endoplasmic reticulum;membrane;mitochondrion                  |                                                                     | 2.687 | 6.356      | 2.37 |
| Q12349 | ATP synthase subunit H, mitochondrial [OS=Saccharomyces cerevisiae S288c]                         | 85100<br>2 | ATP14;<br>YLR295<br>C                | cell organization and biogenesis;metabolic process;transport                                  | membrane;mitochondrion                                        | catalytic activity;transporter activity                             | 0.389 | 0.931      | 2.39 |
| P32799 | Cytochrome c oxidase subunit 6A, mitochondrial [OS=Saccharomyces cerevisiae S288c]                | 85268<br>4 | COX13;<br>YGL191<br>W                | cell organization and biogenesis;metabolic process;regulation of biological process;transport | membrane;mitochondrion                                        | catalytic activity;enzyme regulator activity;transporter activity   | 2.162 | 5.31       | 2.46 |
| Q12032 | Altered inheritance of mitochondria protein 41, mitochondrial [OS=Saccharomyces cerevisiae S288c] | 85439<br>0 | AIM41;<br>YOR21<br>5C                |                                                                                               | mitochondrion                                                 | catalytic activity                                                  | 0.468 | 1.154      | 2.47 |
| P53311 | Mitochondrial pyruvate carrier 3 [OS=Saccharomyces cerevisiae S288c]                              | 85315<br>8 | FMP43;<br>MPC3;<br>YGR24<br>3W       | transport                                                                                     | membrane;mitochondrion                                        | transporter activity                                                | 0.468 | 1.154      | 2.47 |
| P08525 | Cytochrome b-c1 complex subunit 8 [OS=Saccharomyces cerevisiae S288c]                             | 85327<br>3 | QCR8;<br>YJL166<br>W                 | metabolic process;transport                                                                   | membrane;mitochondrion                                        | catalytic activity;transporter activity                             | 0.585 | 1.512      | 2.58 |
| Q02981 | ABC1 family protein YPL109C, mitochondrial [OS=Saccharomyces cerevisiae S288c]                    | 85599<br>5 | YPL109<br>C;<br>YPL109<br>C          |                                                                                               | mitochondrion                                                 |                                                                     | 0.334 | 0.884      | 2.65 |
| Q04935 | Cytochrome c oxidase protein 20, mitochondrial [OS=Saccharomyces cerevisiae S288c]                | 85181<br>7 | COX20;<br>YDR23<br>1C                | cell organization and biogenesis;metabolic process                                            | membrane;mitochondrion                                        | protein binding                                                     | 0.701 | 1.894      | 2.70 |
| P38323 | ATP-dependent clpX-like chaperone, mitochondrial [OS=Saccharomyces cerevisiae S288c]              | 85252<br>8 | MCX1;<br>YBR227<br>C                 | metabolic process                                                                             | membrane;mitochondrion;organelle lumen                        | catalytic activity;nucleotide binding                               | 0.145 | 0.403      | 2.78 |
| P34231 | Uncharacterized protein YKL187C [OS=Saccharomyces cerevisiae S288c]                               | 85364<br>8 | FAT3;<br>YKL187<br>C;<br>YKL187<br>C | cell organization and biogenesis;transport                                                    | membrane;mitochondrion                                        |                                                                     | 0.194 | 0.557      | 2.87 |
| P19516 | Cytochrome c oxidase assembly protein COX11, mitochondrial [OS=Saccharomyces cerevisiae S288c]    | 85597<br>1 | COX11;<br>YPL132<br>W                | cell organization and biogenesis;metabolic process                                            | membrane;mitochondrion;ribosome                               | metal ion binding                                                   | 0.274 | 0.833      | 3.04 |
| Q01574 | acetyl-coenzyme A synthetase 1 [OS=Saccharomyces cerevisiae S288c]                                | 85124<br>5 | ACS1;<br>YAL054<br>C                 | cell organization and biogenesis;metabolic process                                            | cytoplasm;cytosol;endoplasmic reticulum;mitochondrion;nucleus | catalytic activity;nucleotide binding                               | 2.57  | 7.859      | 3.06 |
| Q12276 | HMG2-induced ER-remodeling protein 1 [OS=Saccharomyces cerevisiae S288c]                          | 85440<br>2 | HER1;<br>YOR22<br>7W                 | cell organization and biogenesis                                                              | cytoplasm;mitochondrion;ribosome                              | protein binding                                                     | 0.032 | 0.098      | 3.06 |
| P23833 | Protein SCO1, mitochondrial [OS=Saccharomyces cerevisiae S288c]                                   | 85232<br>5 | SCO1;<br>YBR037<br>C                 | cell organization and biogenesis;cellular homeostasis;response to stimulus;transport          | membrane;mitochondrion                                        | antioxidant activity;catalytic activity;metal ion binding           | 0.292 | 0.896      | 3.07 |
| P38169 | Kynurenine 3-monooxygenase [OS=Saccharomyces cerevisiae S288c]                                    | 85217<br>9 | BNA4;<br>YBL098<br>W                 | metabolic process                                                                             | membrane;mitochondrion                                        | catalytic activity;nucleotide binding                               | 0.083 | 0.269      | 3.24 |
| P53982 | isocitrate dehydrogenase [NADP] [OS=Saccharomyces cerevisiae S288c]                               | 85572<br>3 | IDP3;<br>YNL009<br>W                 | metabolic process                                                                             | cytoplasm;mitochondrion                                       | catalytic activity;metal ion binding;nucleotide binding             | 1.943 | 6.499      | 3.34 |
| P40582 | Glutathione S-transferase 1 [OS=Saccharomyces cerevisiae S288c]                                   | 85485<br>6 | GTT1;<br>YIR038<br>C                 | metabolic process                                                                             | endoplasmic reticulum;membrane;mitochondrion                  | antioxidant activity;catalytic activity;protein binding;RNA binding | 0.638 | 2.162      | 3.39 |
| P38885 | Altered inheritance of mitochondria protein 46, mitochondrial [OS=Saccharomyces cerevisiae S288c] | 85660<br>6 | AIM46;<br>YHR19<br>9C                |                                                                                               | mitochondrion                                                 | catalytic activity                                                  | 0.245 | 0.931      | 3.80 |
| P30902 | ATP synthase subunit d, mitochondrial [OS=Saccharomyces cerevisiae S288c]                         | 85385<br>3 | ATP7;<br>YKL016<br>C                 | metabolic process;transport                                                                   | membrane;mitochondrion                                        | catalytic activity;transporter activity                             | 2.728 | 10.78<br>8 | 3.95 |
| P32897 | Mitochondrial import inner membrane translocase subunit tim23 [OS=Saccharomyces cerevisiae S288c] | 85575<br>1 | TIM23;<br>YNR01<br>7W                | transport                                                                                     | membrane;mitochondrion                                        | protein binding;transporter activity                                | 0.995 | 4.012      | 4.03 |
| Q06698 | Putative ATP-dependent RNA helicase YLR419W [OS=Saccharomyces cerevisiae S288c]                   | 85113<br>7 | YLR419<br>W;<br>YLR419<br>W          | metabolic process                                                                             | cytoplasm;mitochondrion;nucleus                               | catalytic activity;nucleotide binding;protein binding;RNA binding   | 0.054 | 0.233      | 4.31 |
| P37267 | Assembly factor cbp4 [OS=Saccharomyces cerevisiae S288c]                                          |            | CBP4                                 | cell organization and biogenesis                                                              | membrane;mitochondrion                                        |                                                                     | 0.52  | 2.511      | 4.83 |
| P35180 | mitochondrial import receptor subunit Tom20 [OS=Saccharomyces cerevisiae S288c]                   | 85297<br>3 | TOM20<br>;<br>YGR08<br>2W            | cell organization and biogenesis;transport                                                    | membrane;mitochondrion                                        | protein binding;transporter activity                                | 0.194 | 1.031      | 5.31 |
| Q03653 | protein EFR3 [OS=Saccharomyces cerevisiae S288c]                                                  | 85525<br>2 | EFR3;<br>YMR21<br>2C                 |                                                                                               | membrane;mitochondrion                                        |                                                                     | 0.047 | 0.259      | 5.51 |
| P17695 | Glutaredoxin-2, mitochondrial [OS=Saccharomyces cerevisiae S288c]                                 | 85212<br>4 | GRX2;<br>YDR51<br>3W                 | cellular homeostasis;metabolic process;regulation of biological process;response to           | cytoplasm;cytosol;mitochondrion                               | antioxidant activity;catalytic activity                             | 0.233 | 1.31       | 5.62 |

|        |                                                   |        |                |                    |          |  |       |       |      |
|--------|---------------------------------------------------|--------|----------------|--------------------|----------|--|-------|-------|------|
|        |                                                   |        |                | stimulus;transport |          |  |       |       |      |
| P36139 | protein PET10 [OS=Saccharomyces cerevisiae S288c] | 853920 | PET10; YKR046C | metabolic process  | membrane |  | 0.122 | 0.995 | 8.16 |

**Supplemental Table S16. Proteins that are downregulated by the *ups2Δ* mutation (but not by the *ups1Δ* mutation) in cells cultured without LCA are involved in various biological processes.**

Mitochondria were purified from cells recovered on day 2, 4 or 7 of cell culturing without LCA. Mass spectrometry-based identification and quantitation of proteins recovered in purified mitochondria were performed as described in Materials and methods. The exponentially modified protein abundance index (emPAI) provided by the "Proteome Discoverer" software was used to calculate the relative abundance of mitochondrial proteins between *ups2Δ* and WT. Data on the relative concentrations of mitochondrial proteins are presented as means of 2 independent experiments.

| Day | Protein | Ratio <i>ups2</i> /WT | Biological process                                                                                                                                                                                     |
|-----|---------|-----------------------|--------------------------------------------------------------------------------------------------------------------------------------------------------------------------------------------------------|
| 2   | Mrp135  | 0.07                  | Ribosome assembly (mitochondrial ribosomal protein)                                                                                                                                                    |
|     | Imo32   | 0.08                  | Unknown                                                                                                                                                                                                |
|     | Tim11   | 0.09                  | ATP synthesis (a subunit of mitochondrial F1F0-ATPase)                                                                                                                                                 |
|     | Yhb1    | 0.09                  | Stress response (a flavohemoglobin that plays role in oxidative and nitrosative stress responses)                                                                                                      |
|     | Abf2    | 0.11                  | mtDNA replication/recombination/repair (mitochondrial DNA-binding protein)                                                                                                                             |
|     | Qcr8    | 0.11                  | Electron transport chain/aerobic respiration (subunit 8 of ubiquinol cytochrome-c reductase [Complex III])                                                                                             |
|     | Qcr7    | 0.11                  | Electron transport chain/aerobic respiration (subunit 7 of ubiquinol cytochrome-c reductase [Complex III])                                                                                             |
|     | Rrf1    | 0.12                  | Protein synthesis (mitochondrial ribosome recycling factor)                                                                                                                                            |
|     | Idp1    | 0.12                  | Amino acid synthesis or degradation (mitochondrial NADP-specific isocitrate dehydrogenase)                                                                                                             |
|     | Gcv3    | 0.13                  | Metabolite synthesis (H subunit of the glycine decarboxylase complex required for folate synthesis)                                                                                                    |
|     | Gcv2    | 0.13                  | Metabolite synthesis (P subunit of the glycine decarboxylase complex required for folate synthesis)                                                                                                    |
|     | Mcx1    | 0.14                  | Protein import/proteostasis (non-proteolytic ATPase of the AAA family)                                                                                                                                 |
|     | Mcr1    | 0.14                  | Lipid metabolism/homeostasis (NADH-cytochrome b5 reductase involved in ergosterol biosynthesis)                                                                                                        |
|     | Mss116  | 0.14                  | mRNA synthesis/processing (transcription elongation factor required for splicing of introns)                                                                                                           |
|     | Phb1    | 0.15                  | Proteostasis (subunit of the prohibitin complex that stabilizes newly synthesized proteins)                                                                                                            |
|     | Mrp4    | 0.15                  | Ribosome assembly (a mitochondrial ribosomal protein)                                                                                                                                                  |
|     | Aco1    | 0.15                  | TCA cycle (aconitase)                                                                                                                                                                                  |
|     | Idh1    | 0.15                  | TCA cycle (subunit of mitochondrial NAD(+)-dependent isocitrate dehydrogenase)                                                                                                                         |
|     | Bat1    | 0.16                  | Amino acid synthesis or degradation (mitochondrial branched-chain amino acid (BCAA) aminotransferase)                                                                                                  |
|     | Cox4    | 0.16                  | Electron transport chain/aerobic respiration (subunit IV of cytochrome c oxidase)                                                                                                                      |
|     | Sdh1    | 0.16                  | TCA cycle/Electron transport chain/aerobic respiration (flavoprotein subunit of succinate dehydrogenase)                                                                                               |
|     | Psd1    | 0.17                  | Lipid metabolism/homeostasis (phosphatidylserine decarboxylase that converts PS to PE)                                                                                                                 |
|     | Lsc2    | 0.17                  | TCA cycle (β subunit of succinyl-CoA ligase involved in conversion of succinyl-CoA to succinate)                                                                                                       |
|     | Ach1    | 0.17                  | Carbohydrate metabolism (catalyzes CoA-SH transfer from succinyl-CoA to acetate)                                                                                                                       |
|     | Aim46   | 0.17                  | Unknown                                                                                                                                                                                                |
|     | Cpr1    | 0.18                  | Proteostasis (catalyzes the cis-trans isomerization of peptide bonds N-terminal to proline)                                                                                                            |
|     | Rmd9    | 0.18                  | Aerobic respiration (mitochondrial protein required for respiratory growth)                                                                                                                            |
|     | Mrp4    | 0.18                  | Ribosome assembly (mitochondrial ribosomal protein)                                                                                                                                                    |
|     | Fum1    | 0.18                  | TCA cycle (fumarase)                                                                                                                                                                                   |
|     | Mgm101  | 0.19                  | mtDNA replication/recombination/repair (protein involved in mitochondrial DNA recombinational repair)                                                                                                  |
|     | Agx1    | 0.19                  | Amino acid synthesis or degradation (alanine:glyoxylate aminotransferase; catalyzes the synthesis of glycine from glyoxylate)                                                                          |
|     | YJL045W | 0.19                  | Electron transport chain/aerobic respiration (minor succinate dehydrogenase isozyme; participates in oxidation of succinate and transfer of electrons to ubiquinone)                                   |
|     | Ssq1    | 0.19                  | Proteostasis (mitochondrial hsp70-type molecular chaperone; required for assembly of iron/sulfur clusters into proteins at a step after cluster synthesis)                                             |
|     | Lew4    | 0.19                  | Amino acid synthesis or degradation (2-isopropylmalate synthase; the main isozyme responsible for the first step in the leucine biosynthesis pathway)                                                  |
|     | Cpr3    | 0.20                  | Proteostasis (catalyzes the cis-trans isomerization of peptide bonds N-terminal to proline)                                                                                                            |
|     | Mae1    | 0.21                  | Carbohydrate metabolism (mitochondrial malic enzyme; catalyzes the decarboxylation of malate to pyruvate, a key intermediate in gluconeogenesis and a precursor for synthesis of amino acids)          |
|     | Mam33   | 0.21                  | Protein synthesis (specific translational activator for the mitochondrial COX1 mRNA)                                                                                                                   |
|     | Dld1    | 0.22                  | Carbohydrate metabolism (major D-lactate dehydrogenase oxidizing D-lactate to pyruvate)                                                                                                                |
|     | Ehd3    | 0.22                  | Carbohydrate metabolism (3-hydroxyisobutyryl-CoA hydrolase)                                                                                                                                            |
|     | Rsm24   | 0.22                  | Ribosome assembly (mitochondrial ribosomal protein)                                                                                                                                                    |
|     | Adh3    | 0.23                  | Carbohydrate metabolism (mitochondrial alcohol dehydrogenase isozyme III)                                                                                                                              |
|     | Sdh4    | 0.23                  | TCA cycle/Electron transport chain/aerobic respiration (membrane anchor subunit of succinate dehydrogenase)                                                                                            |
|     | Pda1    | 0.23                  | Carbohydrate metabolism (E1 alpha subunit of the pyruvate dehydrogenase complex; catalyzes the direct oxidative decarboxylation of pyruvate to acetyl-CoA)                                             |
|     | Prx1    | 0.24                  | Redox homeostasis (mitochondrial peroxiredoxin with thioredoxin peroxidase activity)                                                                                                                   |
|     | Alt1    | 0.24                  | Amino acid synthesis or degradation (alanine transaminase (glutamic pyruvic transaminase); involved in alanine biosynthesis and catabolism)                                                            |
|     | Ndi1    | 0.25                  | Electron transport chain/aerobic respiration (NADH:ubiquinone oxidoreductase; transfers electrons from NADH to ubiquinone in respiratory chain)                                                        |
|     | Cox6    | 0.25                  | Electron transport chain/aerobic respiration (Subunit VI of cytochrome c oxidase [Complex IV])                                                                                                         |
|     | Mrps12  | 0.25                  | Ribosome assembly (mitochondrial ribosomal protein)                                                                                                                                                    |
|     | Mrp11   | 0.26                  | Ribosome assembly (mitochondrial ribosomal protein)                                                                                                                                                    |
|     | Aim19   | 0.26                  | Unknown                                                                                                                                                                                                |
|     | Mba1    | 0.26                  | Protein synthesis (membrane-associated mitochondrial ribosome receptor; forms a complex with Mdm38p that may facilitate recruitment of mRNA-specific translational activators to ribosomes)            |
|     | Mrp1    | 0.26                  | Ribosome assembly (mitochondrial ribosomal protein)                                                                                                                                                    |
|     | Yml6    | 0.26                  | Ribosome assembly (mitochondrial ribosomal protein)                                                                                                                                                    |
|     | Fsf1    | 0.26                  | Unknown                                                                                                                                                                                                |
|     | Gut2    | 0.27                  | Carbohydrate metabolism (E1 alpha subunit of the pyruvate dehydrogenase complex; catalyzes the direct oxidative decarboxylation of pyruvate to acetyl-CoA)                                             |
|     | Ald4    | 0.27                  | Carbohydrate metabolism (mitochondrial glycerol-3-phosphate dehydrogenase involved in glycerol degradation)                                                                                            |
|     | Tom20   | 0.28                  | Protein import (component of the TOM (translocase of outer membrane) complex; responsible for recognition and initial import steps for all mitochondrially directed proteins)                          |
|     | Sfc1    | 0.28                  | Metabolite transport (mitochondrial succinate-fumarate transporter; transports succinate into and fumarate out of the mitochondrion)                                                                   |
|     | Arg7    | 0.28                  | Amino acid synthesis or degradation (mitochondrial ornithine acetyltransferase; catalyzes the fifth step in arginine biosynthesis)                                                                     |
|     | Put2    | 0.28                  | Amino acid synthesis or degradation (delta-1-pyrroline-5-carboxylate dehydrogenase; mitochondrial protein involved in utilization of proline as sole nitrogen source)                                  |
|     | Cir1    | 0.28                  | Unknown                                                                                                                                                                                                |
|     | Ypt7    | 0.28                  | Contact sites between mitochondria and vacuoles (Rab family GTPase)                                                                                                                                    |
|     | Cat5    | 0.29                  | Metabolite synthesis (is involved in ubiquinone synthesis)                                                                                                                                             |
|     | Vas1    | 0.29                  | Protein synthesis (valyl-tRNA synthetase that performs alanyl-tRNA aminoacylation by coupling valine to valyl-tRNA)                                                                                    |
|     | Cor1    | 0.29                  | Electron transport chain/aerobic respiration (core subunit of the ubiquinol-cytochrome c reductase complex)                                                                                            |
|     | Hsp10   | 0.30                  | Proteostasis (mitochondrial matrix co-chaperonin; inhibits the ATPase activity of Hsp60, a mitochondrial chaperonin)                                                                                   |
|     | Om45    | 0.30                  | Unknown                                                                                                                                                                                                |
|     | Kgd2    | 0.30                  | TCA cycle (dihydrolipoyl transsuccinylase; component of the mitochondrial α-ketoglutarate dehydrogenase complex, which catalyzes the oxidative decarboxylation of alpha-ketoglutarate to succinyl-CoA) |
|     | Mrp24   | 0.30                  | Ribosome assembly (mitochondrial ribosomal protein)                                                                                                                                                    |
|     | Ald5    | 0.31                  | Carbohydrate metabolism (mitochondrial aldehyde dehydrogenase; involved in acetate formation)                                                                                                          |
|     | Bna4    | 0.31                  | Metabolite synthesis (kynurenine 3-monoxygenase; required for the de novo biosynthesis of NAD from tryptophan via kynurenine)                                                                          |
|     | Gcv1    | 0.31                  | Metabolite synthesis (T subunit of the glycine decarboxylase complex required for folate synthesis)                                                                                                    |
|     | Glr1    | 0.31                  | Redox homeostasis (glutathione oxidoreductase; converts oxidized glutathione to reduced glutathione)                                                                                                   |
|     | Mcp2    | 0.31                  | Lipid metabolism/homeostasis (integral membrane protein that localizes to the mitochondrial inner membrane; associates with mitochondrial ribosome)                                                    |

|   |           |      |                                                                                                                                                                                                                                                |
|---|-----------|------|------------------------------------------------------------------------------------------------------------------------------------------------------------------------------------------------------------------------------------------------|
|   | Nfs1      | 0.31 | Protein synthesis (cysteine desulfurase; involved in thio-modification of mitochondrial and cytoplasmic tRNAs)                                                                                                                                 |
|   | Lpd1      | 0.32 | Carbohydrate metabolism (dihydrolipoamide dehydrogenase; the lipoamide dehydrogenase component (E3) of the pyruvate dehydrogenase and 2-oxoglutarate dehydrogenase multi-enzyme complex)                                                       |
|   | Mrx3      | 0.32 | Unknown                                                                                                                                                                                                                                        |
|   | Nam9      | 0.32 | Ribosome assembly (mitochondrial ribosomal protein)                                                                                                                                                                                            |
|   | Mdh1      | 0.33 | TCA cycle (mitochondrial malate dehydrogenase; catalyzes interconversion of malate and oxaloacetate)                                                                                                                                           |
|   | Coq11     | 0.33 | Metabolite synthesis (is involved in ubiquinone synthesis)                                                                                                                                                                                     |
|   | Atp7      | 0.33 | ATP synthesis (a subunit of mitochondrial F1F0-ATPase)                                                                                                                                                                                         |
|   | YFR045W   | 0.33 | Unknown                                                                                                                                                                                                                                        |
|   | YGR266W   | 0.34 | Unknown                                                                                                                                                                                                                                        |
|   | Ssc1      | 0.35 | Protein import/proteostasis (Hsp70 family ATPase; involved in protein translocation and folding)                                                                                                                                               |
|   | Spg4      | 0.36 | Unknown                                                                                                                                                                                                                                        |
|   | Atp15     | 0.36 | ATP synthesis (a subunit of mitochondrial F1F0-ATPase)                                                                                                                                                                                         |
|   | Sdh2      | 0.37 | TCA cycle/Electron transport chain/aerobic respiration (iron-sulfur protein subunit of succinate dehydrogenase; couples the oxidation of succinate to the transfer of electrons to ubiquinone as part of the respiratory chain)                |
|   | YOR020W-A | 0.37 | Unknown                                                                                                                                                                                                                                        |
|   | Pdb1      | 0.37 | Carbohydrate metabolism (E1 beta subunit of the pyruvate dehydrogenase complex)                                                                                                                                                                |
|   | Shy1      | 0.37 | Electron transport chain/aerobic respiration (mitochondrial inner membrane protein required for complex IV assembly)                                                                                                                           |
|   | Cyc1      | 0.37 | Electron transport chain/aerobic respiration (cytochrome c, isoform 1)                                                                                                                                                                         |
|   | Nca2      | 0.38 | ATP synthesis (protein that regulates expression of Fo-F1 ATP synthase subunits)                                                                                                                                                               |
|   | Kgd1      | 0.38 | TCA cycle (subunit of the mitochondrial $\alpha$ -ketoglutarate dehydrogenase complex)                                                                                                                                                         |
|   | Idh2      | 0.38 | TCA cycle (subunit of mitochondrial NAD(+)-dependent isocitrate dehydrogenase)                                                                                                                                                                 |
|   | Mis1      | 0.38 | Metabolite synthesis (mitochondrial C1-tetrahydrofolate synthase)                                                                                                                                                                              |
|   | Lys12     | 0.38 | Amino acid synthesis or degradation (homo-isocitrate dehydrogenase; an NAD-linked mitochondrial enzyme required for the fourth step in the biosynthesis of lysine)                                                                             |
|   | Cyt1      | 0.38 | Electron transport chain/aerobic respiration (Cytochrome c1)                                                                                                                                                                                   |
|   | Mir1      | 0.39 | Metabolite transport (mitochondrial phosphate carrier; imports inorganic phosphate into mitochondria)                                                                                                                                          |
|   | Hem15     | 0.39 | Metabolite synthesis (Ferrochelatase involved in the biosynthesis of heme)                                                                                                                                                                     |
|   | Atp1      | 0.39 | ATP synthesis ( $\alpha$ subunit of the F1 sector of mitochondrial F1F0 ATP synthase)                                                                                                                                                          |
|   | Spg1      | 0.40 | Unknown                                                                                                                                                                                                                                        |
|   | Fmp41     | 0.40 | Unknown                                                                                                                                                                                                                                        |
|   | Aim37     | 0.40 | Contact sites/cristae maintenance (Component of the MICOS [Mitochondrial contact site and cristae organizing system] complex)                                                                                                                  |
|   | Afg1      | 0.41 | Protein import/proteostasis (non-proteolytic ATPase of the AAA family)                                                                                                                                                                         |
|   | Tom40     | 0.41 | Protein import (component of the TOM (translocase of outer membrane) complex; responsible for recognition and initial import steps for all mitochondrially directed proteins)                                                                  |
|   | Yme1      | 0.41 | Protein import/proteostasis (catalytic subunit of i-AAA protease complex)                                                                                                                                                                      |
|   | Pam18     | 0.43 | Protein import/proteostasis (subunit of the PAM [Presequence translocase-associated motor] complex)                                                                                                                                            |
|   | Tim17     | 0.43 | Protein import (essential component of the TIM23 complex; contributes to the architecture and function of the import channel)                                                                                                                  |
|   | Lys4      | 0.43 | Amino acid synthesis or degradation (homoaconitase; catalyzes the conversion of homocitrate to homoisocitrate, which is a step in the lysine biosynthesis pathway)                                                                             |
|   | Yta12     | 0.43 | Protein import/proteostasis (mitochondrial inner membrane m-AAA protease component)                                                                                                                                                            |
|   | Yhm2      | 0.44 | Metabolite transport (citrate and oxoglutarate carrier protein; exports citrate from and imports oxoglutarate into the mitochondrion, causing net export of NADPH reducing equivalents)                                                        |
|   | Fc11      | 0.44 | Contact sites/cristae maintenance (Component of the MICOS [Mitochondrial contact site and cristae organizing system] complex)                                                                                                                  |
|   | Aim24     | 0.44 | Contact sites/cristae maintenance (inner membrane protein that interacts with the MICOS [Mitochondrial contact site and cristae organizing system] complex and is required for its integrity)                                                  |
|   | Mmf1      | 0.45 | Amino acid synthesis or degradation (mitochondrial protein required for transamination of isoleucine)                                                                                                                                          |
|   | Oxa1      | 0.45 | Protein import/proteostasis (mitochondrial inner membrane insertase; mediates the insertion of both mitochondrial- and nuclear-encoded proteins from the matrix into the inner membrane)                                                       |
|   | Fmp10     | 0.45 | Unknown                                                                                                                                                                                                                                        |
|   | She9      | 0.46 | Contact sites/cristae maintenance (mitochondrial inner membrane protein required for the inner membrane organization and normal mitochondrial morphology)                                                                                      |
|   | Mrp8      | 0.46 | Ribosome assembly (mitochondrial ribosomal protein)                                                                                                                                                                                            |
|   | Afg3      | 0.46 | Proteostasis (ATPase and metalloprotease of the inner mitochondrial membrane; subunit of the m-AAA complex involved in assembly of mitochondrial membrane protein complexes, degradation of processing of proteins imported into mitochondria) |
|   | Etr1      | 0.47 | Lipid metabolism/homeostasis (2-enoyl thioester reductase; member of the medium chain dehydrogenase/reductase family; has a probable role in fatty acid synthesis)                                                                             |
|   | Mss51     | 0.47 | Protein synthesis (specific translational activator for the mitochondrial COX1 mRNA)                                                                                                                                                           |
|   | Ape2      | 0.48 | Proteostasis (aminopeptidase yscII; may have a role in obtaining leucine from dipeptide substrates)                                                                                                                                            |
|   | Mcy1      | 0.48 | Amino acid synthesis or degradation (putative cysteine synthase)                                                                                                                                                                               |
|   | Mrx9      | 0.49 | Unknown                                                                                                                                                                                                                                        |
|   | Fmp52     | 0.49 | Unknown                                                                                                                                                                                                                                        |
|   | Mrps35    | 0.49 | Ribosome assembly (mitochondrial ribosomal protein)                                                                                                                                                                                            |
|   | Cir2      | 0.49 | Unknown                                                                                                                                                                                                                                        |
|   | Hsp60     | 0.49 | Proteostasis (mitochondrial chaperonin; required for ATP-dependent folding of precursor polypeptides and complex assembly; prevents aggregation and mediates protein refolding after heat shock)                                               |
| 4 | Aim13     | 0.05 | Contact sites/cristae maintenance (Component of the MICOS [Mitochondrial contact site and cristae organizing system] complex)                                                                                                                  |
|   | YNL200C   | 0.10 | Metabolite synthesis (NADHX epimerase; catalyzes isomerization of (R)- and (S)-NADHX)                                                                                                                                                          |
|   | Cox5A     | 0.21 | Electron transport chain/aerobic respiration (subunit Va of cytochrome c oxidase)                                                                                                                                                              |
|   | Aim32     | 0.21 | Unknown                                                                                                                                                                                                                                        |
|   | Mmt2      | 0.22 | Metabolite transport (putative metal transporter involved in mitochondrial iron accumulation)                                                                                                                                                  |
|   | Mrps16    | 0.23 | Ribosome assembly (mitochondrial ribosomal protein)                                                                                                                                                                                            |
|   | Pet54     | 0.24 | Protein synthesis (mitochondrial inner membrane protein; binds to the 5' UTR of the COX3 mRNA to activate its translation)                                                                                                                     |
|   | Qcr6      | 0.24 | Electron transport chain/aerobic respiration (subunit 6 of the ubiquinol cytochrome-c reductase complex)                                                                                                                                       |
|   | Rsm10     | 0.28 | Ribosome assembly (mitochondrial ribosomal protein)                                                                                                                                                                                            |
|   | Cpr3      | 0.28 | Proteostasis (mitochondrial peptidyl-prolyl cis-trans isomerase (cyclophilin); catalyzes the cis-trans isomerization of peptide bonds N-terminal to proline residues)                                                                          |
|   | Agx1      | 0.28 | Amino acid synthesis or degradation (alanine:glyoxylate aminotransferase (AGT); catalyzes the synthesis of glycine from glyoxylate)                                                                                                            |
|   | Cox20     | 0.29 | Proteostasis (mitochondrial inner membrane protein; required for proteolytic processing of Cox2p and its assembly into cytochrome c oxidase)                                                                                                   |
|   | Mrps18    | 0.29 | Ribosome assembly (mitochondrial ribosomal protein)                                                                                                                                                                                            |
|   | Idp1      | 0.30 | Amino acid synthesis or degradation (mitochondrial NADP-specific isocitrate dehydrogenase; catalyzes the oxidation of isocitrate to alpha-ketoglutarate; diverts alpha-ketoglutarate to glutamine synthetase)                                  |
|   | Mrps9     | 0.30 | Ribosome assembly (mitochondrial ribosomal protein)                                                                                                                                                                                            |
|   | Hem1      | 0.31 | Metabolite synthesis (5-aminolevulinic acid synthase; catalyzes the first step in the heme biosynthetic pathway)                                                                                                                               |
|   | Mst1      | 0.31 | Protein synthesis (mitochondrial threonyl-tRNA synthetase)                                                                                                                                                                                     |
|   | Mrp20     | 0.32 | Ribosome assembly (mitochondrial ribosomal protein)                                                                                                                                                                                            |
|   | Odc2      | 0.32 | Metabolite transport (mitochondrial inner membrane transporter; 2-oxodicarboxylate transporter, exports 2-oxoadipate and 2-oxoglutarate from the mitochondrial matrix to the cytosol)                                                          |
|   | Mct1      | 0.33 | Lipid metabolism/homeostasis (Predicted malonyl-CoA:ACP transferase; putative component of a type-II mitochondrial fatty acid synthase that produces intermediates for phospholipid remodeling)                                                |
|   | Ycp4      | 0.34 | Unknown                                                                                                                                                                                                                                        |
|   | Fmp30     | 0.35 | Lipid metabolism/homeostasis (is involved in maintaining normal cardiolipin levels)                                                                                                                                                            |
|   | Gcv3      | 0.36 | Metabolite synthesis (H subunit of the glycine decarboxylase complex required for folate synthesis)                                                                                                                                            |
|   | Cyc1      | 0.36 | Electron transport chain/aerobic respiration (cytochrome c, isoform 1)                                                                                                                                                                         |
|   | Rfs1      | 0.37 | Unknown                                                                                                                                                                                                                                        |
|   | YOR020W-A | 0.37 | Unknown                                                                                                                                                                                                                                        |
|   | Isd11     | 0.37 | Metabolite synthesis (essential for the formation of the persulfide intermediate at the desulfurase active site during pyridoxal phosphate-dependent desulfuration of cysteine; required for mitochondrial heme synthesis)                     |
|   | Fum1      | 0.38 | TCA cycle (fumarase)                                                                                                                                                                                                                           |
|   | Nfs1      | 0.38 | Protein synthesis (cysteine desulfurase; involved in thio-modification of mitochondrial and cytoplasmic tRNAs)                                                                                                                                 |
|   | Dld1      | 0.38 | Carbohydrate metabolism (major D-lactate dehydrogenase oxidizing D-lactate to pyruvate)                                                                                                                                                        |
|   | Mrp124    | 0.39 | Ribosome assembly (mitochondrial ribosomal protein)                                                                                                                                                                                            |
|   | Cep1      | 0.39 | Redox homeostasis (mitochondrial cytochrome-c peroxidase; degrades reactive oxygen species in mitochondria, involved in the response to oxidative stress)                                                                                      |
|   | Nat2      | 0.39 | Unknown                                                                                                                                                                                                                                        |
|   | YJL045W   | 0.40 | Electron transport chain/aerobic respiration (minor succinate dehydrogenase isoform; participates in oxidation of succinate and transfer of electrons to ubiquinone)                                                                           |
|   | Acs1      | 0.40 | Carbohydrate metabolism (Acetyl-coA synthetase isoform)                                                                                                                                                                                        |

|         |      |                                                                                                                                                                                                                                                      |
|---------|------|------------------------------------------------------------------------------------------------------------------------------------------------------------------------------------------------------------------------------------------------------|
| Mmf1    | 0.41 | Amino acid synthesis or degradation (mitochondrial protein required for transamination of isoleucine)                                                                                                                                                |
| Mrps8   | 0.41 | Ribosome assembly (mitochondrial ribosomal protein)                                                                                                                                                                                                  |
| Ald4    | 0.41 | Carbohydrate metabolism (mitochondrial glycerol-3-phosphate dehydrogenase involved in glycerol degradation)                                                                                                                                          |
| Cat2    | 0.42 | Metabolite transport (carnitine acetyl-CoA transferase; transfers activated acetyl groups to carnitine to form acetylcarnitine which can be shuttled across membranes)                                                                               |
| Pam18   | 0.43 | Protein import/proteostasis (subunit of the PAM [Presequence translocase-associated motor] complex)                                                                                                                                                  |
| Atp4    | 0.43 | ATP synthesis (subunit b of the F1 sector of mitochondrial F1F0 ATP synthase)                                                                                                                                                                        |
| Mrpl36  | 0.44 | Ribosome assembly (mitochondrial ribosomal protein)                                                                                                                                                                                                  |
| Oml4    | 0.44 | Protein import (mitochondrial outer membrane protein that binds to the nascent chain-associated complex to dock cytosolic ribosomes at the mitochondrion and facilitate co-translational import of mitochondria)                                     |
| Afg1    | 0.44 | Protein import/proteostasis (non-proteolytic ATPase of the AAA family)                                                                                                                                                                               |
| Mir1    | 0.45 | Metabolite transport (mitochondrial phosphate carrier; imports inorganic phosphate into mitochondria)                                                                                                                                                |
| Mrp49   | 0.45 | Ribosome assembly (mitochondrial ribosomal protein)                                                                                                                                                                                                  |
| Isu1    | 0.45 | Metabolite synthesis (performs a scaffolding function during assembly of iron-sulfur clusters)                                                                                                                                                       |
| Ph2     | 0.46 | Proteostasis (one of two mitochondrially-localized peptidyl-tRNA hydrolases; negatively regulates the ubiquitin-proteasome pathway via interactions with ubiquitin-like ubiquitin-associated proteins)                                               |
| Mrp7    | 0.47 | Ribosome assembly (mitochondrial ribosomal protein)                                                                                                                                                                                                  |
| Ssq1    | 0.47 | Proteostasis (mitochondrial hsp70-type molecular chaperone; required for assembly of iron/sulfur clusters into proteins at a step after cluster synthesis)                                                                                           |
| Pgk1    | 0.47 | ATP synthesis (3-phosphoglycerate kinase; catalyzes transfer of high-energy phosphoryl groups from the acyl phosphate of 1,3-bisphosphoglycerate to ADP to produce ATP)                                                                              |
| Cyt1    | 0.47 | Electron transport chain/aerobic respiration (Cytochrome c1)                                                                                                                                                                                         |
| Erg9    | 0.47 | Lipid metabolism/homeostasis (Farnesyl-diphosphate farnesyl transferase (squalene synthase); joins two farnesyl pyrophosphate moieties to form squalene in the sterol biosynthesis pathway)                                                          |
| Qri7    | 0.48 | Protein synthesis (highly conserved mitochondrial protein; essential for t6A modification of mitochondrial tRNAs that decode ANN codons)                                                                                                             |
| Sco2    | 0.48 | Metabolite transport (is involved in delivery of copper to cytochrome c oxidase)                                                                                                                                                                     |
| Fmp43   | 0.48 | Metabolite transport (highly conserved subunit of the mitochondrial pyruvate carrier)                                                                                                                                                                |
| Afg3    | 0.48 | Proteostasis (ATPase and metalloprotease of the inner mitochondrial membrane; subunit of the m-AAA complex involved in assembly of mitochondrial membrane protein complexes, degradation of proteins imported into mitochondria)                     |
| 7       |      |                                                                                                                                                                                                                                                      |
| Mrp7    | 0.06 | Ribosome assembly (mitochondrial ribosomal protein)                                                                                                                                                                                                  |
| Rsm28   | 0.11 | Ribosome assembly (mitochondrial ribosomal protein)                                                                                                                                                                                                  |
| Ptc7    | 0.13 | Metabolite synthesis (Type 2C serine/threonine protein phosphatase; activates coenzyme Q6 biosynthesis by dephosphorylation of demethoxy-Q6 hydroxylase Coq7p)                                                                                       |
| Ilv6    | 0.13 | Amino acid synthesis or degradation (regulatory subunit of acetolactate synthase; acetolactate synthase catalyzes the first step of branched-chain amino acid biosynthesis)                                                                          |
| Qcr7    | 0.15 | Electron transport chain/aerobic respiration (subunit 7 of ubiquinol cytochrome-c reductase [Complex III])                                                                                                                                           |
| Mrpl11  | 0.15 | Ribosome assembly (mitochondrial ribosomal protein)                                                                                                                                                                                                  |
| Cbp4    | 0.16 | Proteostasis (mitochondrial protein required for assembly of cytochrome bc1 complex)                                                                                                                                                                 |
| Abf2    | 0.16 | mtDNA replication/recombination/repair (mitochondrial DNA-binding protein)                                                                                                                                                                           |
| Mrpl10  | 0.16 | Ribosome assembly (mitochondrial ribosomal protein)                                                                                                                                                                                                  |
| YNL208W | 0.16 | Unknown                                                                                                                                                                                                                                              |
| Ymr31   | 0.17 | TCA cycle (subunit of the mitochondrial alpha-ketoglutarate dehydrogenase)                                                                                                                                                                           |
| Aim19   | 0.17 | Unknown                                                                                                                                                                                                                                              |
| Mrpl27  | 0.17 | Ribosome assembly (mitochondrial ribosomal protein)                                                                                                                                                                                                  |
| Yml6    | 0.17 | Ribosome assembly (mitochondrial ribosomal protein)                                                                                                                                                                                                  |
| Mrpl8   | 0.20 | Ribosome assembly (mitochondrial ribosomal protein)                                                                                                                                                                                                  |
| Mrps28  | 0.21 | Ribosome assembly (mitochondrial ribosomal protein)                                                                                                                                                                                                  |
| Var1    | 0.21 | Ribosome assembly (mitochondrial ribosomal protein)                                                                                                                                                                                                  |
| Yhb1    | 0.22 | Stress response (a flavohemoglobin that plays role in oxidative and nitrosative stress responses)                                                                                                                                                    |
| Mrpl22  | 0.23 | Ribosome assembly (mitochondrial ribosomal protein)                                                                                                                                                                                                  |
| Ehd3    | 0.23 | Carbohydrate metabolism (3-hydroxyisobutyryl-CoA hydrolase)                                                                                                                                                                                          |
| Arg7    | 0.24 | Amino acid synthesis or degradation (mitochondrial ornithine acetyltransferase; catalyzes the fifth step in arginine biosynthesis)                                                                                                                   |
| Tim23   | 0.25 | Protein import (essential component of the TIM23 complex; involved in protein import into mitochondrial matrix and inner membrane)                                                                                                                   |
| Rrf1    | 0.26 | Protein synthesis (mitochondrial ribosome recycling factor)                                                                                                                                                                                          |
| Pet123  | 0.26 | Ribosome assembly (mitochondrial ribosomal protein)                                                                                                                                                                                                  |
| Grx2    | 0.27 | Redox homeostasis (glutaredoxin; thioltransferase, glutathione-dependent disulfide oxidoreductase involved in maintaining redox state of target proteins, also exhibits glutathione peroxidase activity)                                             |
| Ilv1    | 0.27 | Amino acid synthesis or degradation (threonine deaminase, catalyzes first step in isoleucine biosynthesis)                                                                                                                                           |
| Nfu1    | 0.27 | Proteostasis (protein involved in Fe-S cluster transfer to mitochondrial clients; protects [4Fe-4S] clusters from damage due to oxidative stress; acts along with Bol3 at a late step in the transfer of [4Fe-4S] clusters to mitochondrial clients) |
| Coq11   | 0.27 | Metabolite synthesis (is involved in ubiquinone synthesis)                                                                                                                                                                                           |
| Mam33   | 0.27 | Protein synthesis (specific translational activator for the mitochondrial COX1 mRNA)                                                                                                                                                                 |
| Cox6    | 0.27 | Electron transport chain/aerobic respiration (Subunit VI of cytochrome c oxidase [Complex IV])                                                                                                                                                       |
| Sod1    | 0.28 | Stress response (copper-zinc superoxide dismutase; detoxifies superoxide; phosphorylated by Dun1p, enters nucleus under oxidative stress to promote transcription of stress response genes)                                                          |
| Glt1    | 0.30 | Redox homeostasis (glutathione S-transferase)                                                                                                                                                                                                        |
| Gpd2    | 0.30 | Carbohydrate metabolism (NAD-dependent glycerol 3-phosphate dehydrogenase; is involved in glycerol biosynthesis)                                                                                                                                     |
| Bna4    | 0.31 | Metabolite synthesis (kynurenine 3-monooxygenase; required for the de novo biosynthesis of NAD from tryptophan via kynurenine)                                                                                                                       |
| Her2    | 0.31 | Unknown                                                                                                                                                                                                                                              |
| Sdh4    | 0.32 | TCA cycle/Electron transport chain/aerobic respiration (membrane anchor subunit of succinate dehydrogenase)                                                                                                                                          |
| Aim37   | 0.32 | Contact sites/cristae maintenance (Component of the MICOS [Mitochondrial contact site and cristae organizing system] complex)                                                                                                                        |
| Nam9    | 0.32 | Ribosome assembly (mitochondrial ribosomal protein)                                                                                                                                                                                                  |
| Mgm101  | 0.33 | mtDNA replication/recombination/repair (protein involved in mitochondrial DNA recombinational repair)                                                                                                                                                |
| Cox4    | 0.33 | Electron transport chain/aerobic respiration (subunit IV of cytochrome c oxidase)                                                                                                                                                                    |
| YKR070W | 0.33 | Unknown                                                                                                                                                                                                                                              |
| Mss116  | 0.33 | mRNA synthesis/processing (transcription elongation factor required for splicing of introns)                                                                                                                                                         |
| Pos5    | 0.33 | Metabolite synthesis (mitochondrial NADH kinase; phosphorylates NADH)                                                                                                                                                                                |
| Mrp13   | 0.33 | Ribosome assembly (mitochondrial ribosomal protein)                                                                                                                                                                                                  |
| Mba1    | 0.33 | Protein synthesis (membrane-associated mitochondrial ribosome receptor; forms a complex with Mdm38p that may facilitate recruitment of mRNA-specific translational activators to ribosomes)                                                          |
| Cem1    | 0.34 | Carbohydrate metabolism (mitochondrial beta-keto-acyl synthase; possible role in fatty acid synthesis)                                                                                                                                               |
| Mrpl35  | 0.35 | Ribosome assembly (mitochondrial ribosomal protein)                                                                                                                                                                                                  |
| Mrp4    | 0.35 | Ribosome assembly (mitochondrial ribosomal protein)                                                                                                                                                                                                  |
| Idp1    | 0.35 | Amino acid synthesis or degradation (mitochondrial NADP-specific isocitrate dehydrogenase; catalyzes the oxidation of isocitrate to alpha-ketoglutarate; diverts alpha-ketoglutarate to glutamine synthetase)                                        |
| Cpr3    | 0.35 | Proteostasis (mitochondrial peptidyl-prolyl cis-trans isomerase (cyclophilin); catalyzes the cis-trans isomerization of peptide bonds N-terminal to proline residues)                                                                                |
| Nfs1    | 0.36 | Protein synthesis (cysteine desulfurase; involved in thio-modification of mitochondrial and cytoplasmic tRNAs)                                                                                                                                       |
| Agx1    | 0.36 | Amino acid synthesis or degradation (alanine:glyoxylate aminotransferase (AGT); catalyzes the synthesis of glycine from glyoxylate)                                                                                                                  |
| Atp15   | 0.36 | ATP synthesis (a subunit of mitochondrial F1F0-ATPase)                                                                                                                                                                                               |
| Tuf1    | 0.36 | Protein synthesis (Mitochondrial translation elongation factor Tu)                                                                                                                                                                                   |
| Pnt1    | 0.36 | Proteostasis (mitochondrial integral inner membrane protein; involved in membrane insertion of C-terminus of Cox2p)                                                                                                                                  |
| Cym1    | 0.37 | Proteostasis (lysine-specific metalloprotease of the pirilysin family; metalloprotease of the intermembrane space; degrades proteins and presequence peptides cleaved from imported proteins)                                                        |
| Ifm1    | 0.37 | Protein synthesis (mitochondrial translation initiation factor 2)                                                                                                                                                                                    |
| Hsp78   | 0.37 | Proteostasis (oligomeric mitochondrial matrix chaperone; able to prevent the aggregation of misfolded proteins as well as resolubilize protein aggregates)                                                                                           |
| Rim1    | 0.37 | mtDNA replication/recombination/repair (ssDNA-binding protein essential for mitochondrial genome maintenance; involved in mitochondrial DNA replication)                                                                                             |
| Vas1    | 0.38 | Protein synthesis (valyl-tRNA synthetase that performs alanyl-tRNA aminoacylation by coupling valine to valyl-tRNA)                                                                                                                                  |
| Fmp40   | 0.38 | Unknown                                                                                                                                                                                                                                              |
| Aim9    | 0.38 | Unknown                                                                                                                                                                                                                                              |
| YGR266W | 0.38 | Unknown                                                                                                                                                                                                                                              |
| Gev3    | 0.38 | Metabolite synthesis (H subunit of the glycine decarboxylase complex required for folate synthesis)                                                                                                                                                  |
| Fum1    | 0.39 | TCA cycle (fumarase)                                                                                                                                                                                                                                 |
| Rcf1    | 0.39 | Proteostasis (cytochrome c oxidase subunit; required for assembly of the Complex III-Complex IV supercomplex, and for assembly of Cox13p and Rcf2p into cytochrome c oxidase)                                                                        |
| Spq1    | 0.39 | Unknown                                                                                                                                                                                                                                              |

|         |      |                                                                                                                                                                                                                                                                |
|---------|------|----------------------------------------------------------------------------------------------------------------------------------------------------------------------------------------------------------------------------------------------------------------|
| Shm1    | 0.39 | Metabolite synthesis (mitochondrial serine hydroxymethyltransferase; converts serine to glycine plus 5,10 methylenetetrahydrofolate; involved in generating precursors for purine, pyrimidine, amino acid synthesis and purine biosynthesis; generates serine) |
| Ilv3    | 0.40 | Metabolite synthesis (dihydroxyacid dehydratase; catalyzes third step in the common pathway leading to biosynthesis of branched-chain amino acids)                                                                                                             |
| Fmp43   | 0.41 | Metabolite transport (highly conserved subunit of the mitochondrial pyruvate carrier)                                                                                                                                                                          |
| Mrps17  | 0.42 | Ribosome assembly (mitochondrial ribosomal protein)                                                                                                                                                                                                            |
| Cep1    | 0.43 | Redox homeostasis (mitochondrial cytochrome-c peroxidase; degrades reactive oxygen species in mitochondria, involved in the response to oxidative stress)                                                                                                      |
| Pdx1    | 0.43 | Carbohydrate metabolism (E3-binding protein of the mitochondrial pyruvate dehydrogenase complex)                                                                                                                                                               |
| Mrp13   | 0.43 | Ribosome assembly (mitochondrial ribosomal protein)                                                                                                                                                                                                            |
| Pam18   | 0.43 | Protein import/protostasis (subunit of the PAM [Presequence translocase-associated motor] complex)                                                                                                                                                             |
| Mmf1    | 0.43 | Amino acid synthesis or degradation (mitochondrial protein required for transamination of isoleucine)                                                                                                                                                          |
| Mrx3    | 0.43 | Unknown                                                                                                                                                                                                                                                        |
| Tim21   | 0.43 | Protein import (component of the TIM23 complex; interacts with the Translocase of the Outer Mitochondrial membrane (TOM complex))                                                                                                                              |
| Msd1    | 0.43 | Protein synthesis (mitochondrial aspartyl-tRNA synthetase; required for acylation of aspartyl-tRNA)                                                                                                                                                            |
| Atp7    | 0.44 | ATP synthesis (a subunit of mitochondrial F1F0-ATPase)                                                                                                                                                                                                         |
| Dld2    | 0.44 | Carbohydrate metabolism (D-2-hydroxyglutarate dehydrogenase, and minor D-lactate dehydrogenase; mitochondrial matrix protein that oxidizes D-2-hydroxyglutarate to $\alpha$ -ketoglutarate)                                                                    |
| Ctp1    | 0.44 | Metabolite transport (mitochondrial inner membrane citrate transporter)                                                                                                                                                                                        |
| Mrx9    | 0.45 | Unknown                                                                                                                                                                                                                                                        |
| Ysa1    | 0.46 | Metabolite synthesis (nudix hydrolase family member with ADP-ribose pyrophosphatase activity; metabolizes O-acetyl-ADP-ribose to AMP and acetylated ribose 5'-phosphate)                                                                                       |
| Fzo1    | 0.47 | Mitochondrial fusion (mitofusin; integral membrane protein involved in mitochondrial outer membrane tethering and fusion)                                                                                                                                      |
| Ssq1    | 0.47 | Proteostasis (mitochondrial hsp70-type molecular chaperone; required for assembly of iron/sulfur clusters into proteins at a step after cluster synthesis)                                                                                                     |
| YPR098C | 0.47 | Unknown                                                                                                                                                                                                                                                        |
| Mrp1    | 0.47 | Ribosome assembly (mitochondrial ribosomal protein)                                                                                                                                                                                                            |
| Alt1    | 0.47 | Amino acid synthesis or degradation (alanine transaminase (glutamic pyruvic transaminase); involved in alanine biosynthesis and catabolism)                                                                                                                    |
| Mdj1    | 0.47 | Proteostasis (Co-chaperone that stimulates HSP70 protein Ssc1p ATPase activity; involved in protein folding/refolding in the mitochondrial matrix; required for proteolysis of misfolded proteins)                                                             |
| Tef4    | 0.48 | Protein synthesis (gamma subunit of translational elongation factor eEF1B)                                                                                                                                                                                     |
| Fsf1    | 0.48 | Unknown                                                                                                                                                                                                                                                        |
| Mdm10   | 0.48 | Metabolite transport (component of ERMES complex which acts as a molecular tether between the mitochondria and the ER, necessary for efficient phospholipid exchange between organelles and for stress response)                                               |
| Sod2    | 0.48 | Stress response (mitochondrial manganese superoxide dismutase; protects cells against oxygen toxicity and oxidative stress)                                                                                                                                    |
| Cox1    | 0.48 | Electron transport chain/aerobic respiration (Subunit I of cytochrome c oxidase [Complex IV])                                                                                                                                                                  |
| Aim45   | 0.49 | Unknown                                                                                                                                                                                                                                                        |
| Msr1    | 0.49 | Protein synthesis (mitochondrial arginyl-tRNA synthetase)                                                                                                                                                                                                      |
| Idh1    | 0.49 | TCA cycle (subunit of mitochondrial NAD(+)-dependent isocitrate dehydrogenase)                                                                                                                                                                                 |
| Tom71   | 0.49 | Protein import (mitochondrial outer membrane protein; probable minor component of the TOM (translocase of outer membrane) complex responsible for recognition and import of mitochondrially directed proteins)                                                 |
| Cit3    | 0.49 | TCA cycle (dual specificity mitochondrial citrate and methylcitrate synthase; catalyzes the condensation of acetyl-CoA and oxaloacetate to form citrate)                                                                                                       |

**Supplemental Table S17. Proteins that are upregulated by the *ups2Δ* mutation (but not by the *ups1Δ* mutation) in cells cultured without LCA are involved in various biological processes.**

Mitochondria were purified from cells recovered on day 2, 4 or 7 of cell culturing without LCA. Mass spectrometry-based identification and quantitation of proteins recovered in purified mitochondria were performed as described in Materials and methods. The exponentially modified protein abundance index (emPAI) provided by the "Proteome Discoverer" software was used to calculate the relative abundance of mitochondrial proteins between *ups2Δ* and WT. Data on the relative concentrations of mitochondrial proteins are presented as means of 2 independent experiments.

| Day   | Protein | Ratio <i>ups2</i> /WT | Biological process                                                                                                                                                                                                                              |                                                                                                                |
|-------|---------|-----------------------|-------------------------------------------------------------------------------------------------------------------------------------------------------------------------------------------------------------------------------------------------|----------------------------------------------------------------------------------------------------------------|
| 2     | Coq2    | 1.60                  | Metabolite synthesis (is involved in ubiquinone synthesis)                                                                                                                                                                                      |                                                                                                                |
|       | Crc1    | 1.81                  | Metabolite transport (is required for carnitine-dependent transport of acetyl-CoA)                                                                                                                                                              |                                                                                                                |
|       | Zeo1    | 1.86                  | Unknown                                                                                                                                                                                                                                         |                                                                                                                |
|       | Cyt2    | 2.16                  | Electron transport chain/aerobic respiration (is involved in maturation of cytochrome c1)                                                                                                                                                       |                                                                                                                |
| 4     | Pet9    | 1.52                  | Metabolite transport (major ADP/ATP carrier of the mitochondrial inner membrane; exchanges cytosolic ADP for mitochondrially synthesized ATP; also imports heme and ATP)                                                                        |                                                                                                                |
|       | Mne1    | 1.55                  | mRNA synthesis/processing (protein involved in splicing Group I aI5-beta intron from COX1 mRNA)                                                                                                                                                 |                                                                                                                |
|       | Msm1    | 1.56                  | Protein synthesis (mitochondrial methionyl-tRNA synthetase)                                                                                                                                                                                     |                                                                                                                |
|       | Rcf2    | 1.61                  | Electron transport chain/respiration (cytochrome c oxidase subunit; has a role in assembly of respiratory supercomplexes)                                                                                                                       |                                                                                                                |
|       | Fba1    | 1.62                  | Carbohydrate metabolism (Fructose 1,6-bisphosphate aldolase; required for glycolysis and gluconeogenesis; catalyzes conversion of fructose 1,6 bisphosphate to glyceraldehyde-3-P and dihydroxyacetone-P; is involved in oxidative stress)      |                                                                                                                |
|       | Mrp127  | 1.70                  | Ribosome assembly (mitochondrial ribosomal protein)                                                                                                                                                                                             |                                                                                                                |
|       | Rsm18   | 1.70                  | Ribosome assembly (mitochondrial ribosomal protein)                                                                                                                                                                                             |                                                                                                                |
|       | YPL109C | 1.75                  | Unknown                                                                                                                                                                                                                                         |                                                                                                                |
|       | Nam9    | 1.76                  | Ribosome assembly (mitochondrial ribosomal protein)                                                                                                                                                                                             |                                                                                                                |
|       | Ncp1    | 1.76                  | Lipid metabolism (NADP-cytochrome P450 reductase; involved in ergosterol biosynthesis)                                                                                                                                                          |                                                                                                                |
|       | Osm1    | 1.80                  | Metabolite synthesis (fumarate reductase with a role in oxidation of FAD)                                                                                                                                                                       |                                                                                                                |
|       | Mrp7    | 1.85                  | Ribosome assembly (mitochondrial ribosomal protein)                                                                                                                                                                                             |                                                                                                                |
|       | Ccm1    | 2.02                  | mRNA synthesis/processing (mitochondrial 15S rRNA-binding protein; required for intron removal of COB and COX1 pre-mRNAs)                                                                                                                       |                                                                                                                |
|       | Aat1    | 2.07                  | Amino acid metabolism (mitochondrial aspartate aminotransferase; catalyzes the conversion of oxaloacetate to aspartate in aspartate and asparagine biosynthesis)                                                                                |                                                                                                                |
|       | Gpd2    | 2.09                  | Carbohydrate metabolism (NAD-dependent glycerol 3-phosphate dehydrogenase; is involved in glycerol metabolism)                                                                                                                                  |                                                                                                                |
|       | Rsm23   | 2.10                  | Ribosome assembly (mitochondrial ribosomal protein)                                                                                                                                                                                             |                                                                                                                |
|       | Nit3    | 2.12                  | Unknown                                                                                                                                                                                                                                         |                                                                                                                |
|       | Pgi1    | 2.16                  | Carbohydrate metabolism (phosphoglucose isomerase; catalyzes the interconversion of glucose-6-phosphate and fructose-6-phosphate in glycolysis and gluconeogenesis)                                                                             |                                                                                                                |
|       | Mrh4    | 2.23                  | Ribosome assembly (mitochondrial ATP-dependent RNA helicase of the DEAD-box family; required for assembly of the large subunit of mitochondrial ribosomes)                                                                                      |                                                                                                                |
|       | Aep2    | 2.29                  | Protein synthesis (is involved in translation of the mitochondrial OLI1 mRNA)                                                                                                                                                                   |                                                                                                                |
|       | Msw1    | 2.29                  | Protein synthesis (mitochondrial tryptophanyl-tRNA synthetase)                                                                                                                                                                                  |                                                                                                                |
|       | Rsm28   | 2.39                  | Ribosome assembly (mitochondrial ribosomal protein)                                                                                                                                                                                             |                                                                                                                |
|       | Mrp110  | 2.55                  | Ribosome assembly (mitochondrial ribosomal protein)                                                                                                                                                                                             |                                                                                                                |
|       | Efr3    | 2.70                  | Unknown                                                                                                                                                                                                                                         |                                                                                                                |
|       | Oxa1    | 2.82                  | Protein import/proteostasis (mitochondrial inner membrane insertase; mediates the insertion of both mitochondrial- and nuclear-encoded proteins from the matrix into the inner membrane; also has a role in inner membrane)                     |                                                                                                                |
|       | Bna4    | 2.83                  | Metabolite synthesis (kynurenine 3-monooxygenase; required for the de novo biosynthesis of NAD from tryptophan via kynurenine)                                                                                                                  |                                                                                                                |
|       | Teb3    | 2.85                  | Unknown                                                                                                                                                                                                                                         |                                                                                                                |
|       | Mrp14   | 2.93                  | Ribosome assembly (mitochondrial ribosomal protein)                                                                                                                                                                                             |                                                                                                                |
|       | Ifm1    | 3.35                  | Protein synthesis (Mitochondrial translation initiation factor 2)                                                                                                                                                                               |                                                                                                                |
|       | Mrh1    | 3.36                  | Unknown                                                                                                                                                                                                                                         |                                                                                                                |
|       | Pgs1    | 4.51                  | Lipid metabolism (Phosphatidylglycerolphosphate synthase; catalyzes the synthesis of phosphatidylglycerolphosphate from CDP-diacylglycerol and sn-glycerol 3-phosphate in the first committed and rate-limiting step of triglyceride synthesis) |                                                                                                                |
|       | 7       | Ncp1                  | 1.57                                                                                                                                                                                                                                            | Lipid metabolism (NADP-cytochrome P450 reductase; involved in ergosterol biosynthesis)                         |
|       |         | Tsc13                 | 1.61                                                                                                                                                                                                                                            | Lipid metabolism (enoyl reductase; catalyzes last step in each cycle of very long chain fatty acid elongation) |
|       |         | Aep2                  | 1.63                                                                                                                                                                                                                                            | Protein synthesis (is involved in translation of the mitochondrial OLI1 mRNA)                                  |
|       |         | Eis1                  | 1.66                                                                                                                                                                                                                                            | Unknown                                                                                                        |
|       |         | Ggc1                  | 1.72                                                                                                                                                                                                                                            | Metabolite transport (mitochondrial GTP/GDP transporter)                                                       |
| Hsp26 |         | 1.85                  | Proteostasis (small heat shock protein with chaperone activity; forms hollow, sphere-shaped oligomers that suppress unfolded proteins aggregation)                                                                                              |                                                                                                                |
| Ugo1  |         | 1.85                  | Mitochondrial fusion (outer membrane component of the mitochondrial fusion machinery)                                                                                                                                                           |                                                                                                                |
| Ady2  |         | 2.03                  | Metabolite transport (acetate transporter)                                                                                                                                                                                                      |                                                                                                                |
| Fat3  |         | 2.09                  | Metabolite transport (protein required for fatty acid uptake)                                                                                                                                                                                   |                                                                                                                |
| Put1  |         | 2.09                  | Amino acid metabolism (proline oxidase; nuclear-encoded mitochondrial protein involved in utilization of proline as sole nitrogen source)                                                                                                       |                                                                                                                |
| Tgl2  |         | 2.23                  | Lipid metabolism (Triacylglycerol lipase that is localized to the mitochondria)                                                                                                                                                                 |                                                                                                                |
| Sam37 |         | 3.35                  | Proteostasis (component of the Sorting and Assembly Machinery (SAM) complex; the SAM complex is located in the mitochondrial outer membrane; binds precursors of beta-barrel proteins and facilitates the SAM complex stability)                |                                                                                                                |
| Acc1  |         | 8.47                  | Lipid metabolism (acetyl-CoA carboxylase, biotin containing enzyme; catalyzes carboxylation of acetyl-CoA to form malonyl-CoA; required for de novo biosynthesis of long-chain fatty acids)                                                     |                                                                                                                |



**Supplemental Table S18. Proteins that are downregulated by LCA only in *ups2Δ* cells (but not in WT or *ups1Δ* cells) are involved in several biological processes.** Mitochondria were purified from cells recovered on day 2, 4 or 7 of cell culturing with LCA. Mass spectrometry-based identification and quantitation of proteins recovered in purified mitochondria were performed as described in Materials and methods. The exponentially modified protein abundance index (emPAI) provided by the "Proteome Discoverer" software was used to calculate the relative abundance of mitochondrial proteins between *ups2Δ* cells cultured with or without LCA. Data on the relative concentrations of mitochondrial proteins are presented as means of 2 independent experiments.

| Day | Protein | Ratio <i>ups2</i> + LCA/ <i>ups2</i> | Biological process                                                                                                                                                                                        |
|-----|---------|--------------------------------------|-----------------------------------------------------------------------------------------------------------------------------------------------------------------------------------------------------------|
| 2   | Mrps28  | 0.47                                 | Ribosome assembly (mitochondrial ribosomal protein)                                                                                                                                                       |
|     | Ptc7    | 0.47                                 | Metabolite synthesis (type 2C serine/threonine protein phosphatase; activates coenzyme Q6 biosynthesis by dephosphorylation of demethoxy-Q6 hydroxylase Coq7p)                                            |
|     | Mst1    | 0.48                                 | Protein synthesis (mitochondrial threonyl-tRNA synthetase)                                                                                                                                                |
|     | Oac1    | 0.49                                 | Metabolite transport (mitochondrial inner membrane transporter; transports oxaloacetate, sulfate, thiosulfate, and isopropylmalate)                                                                       |
| 4   | Pgs1    | 0.22                                 | Lipid metabolism (phosphatidylglycerol phosphate synthase; catalyzes the synthesis of phosphatidylglycerol phosphate from CDP-diacylglycerol and sn-glycerol 3-phosphate in the first committed and rate- |
|     | Mrpl27  | 0.26                                 | Ribosome assembly (mitochondrial ribosomal protein)                                                                                                                                                       |
|     | Mne1    | 0.31                                 | mRNA synthesis/processing (protein involved in splicing Group I aI5-beta intron from COX1 mRNA)                                                                                                           |
|     | Acs1    | 0.37                                 | Carbohydrate metabolism (acetyl-coA synthetase isoform)                                                                                                                                                   |
|     | Mrpl28  | 0.45                                 | Ribosome assembly (mitochondrial ribosomal protein)                                                                                                                                                       |
|     | Mrp7    | 0.45                                 | Ribosome assembly (mitochondrial ribosomal protein)                                                                                                                                                       |
|     | Mrps8   | 0.46                                 | Ribosome assembly (mitochondrial ribosomal protein)                                                                                                                                                       |
|     | Mhr1    | 0.46                                 | Ribosome assembly (mitochondrial ribosomal protein)                                                                                                                                                       |
|     | Ald6    | 0.46                                 | Carbohydrate metabolism (aldehyde dehydrogenase; required for conversion of acetaldehyde to acetate; locates to the mitochondrial outer surface upon oxidative stress)                                    |
|     | Coq2    | 0.47                                 | Metabolite synthesis (Para hydroxybenzoate polyprenyl transferase; catalyzes the second step in ubiquinone [coenzyme Q] biosynthesis)                                                                     |
|     | Nit3    | 0.47                                 | Unknown                                                                                                                                                                                                   |
|     | Ylf2    | 0.48                                 | Unknown                                                                                                                                                                                                   |
|     | Dia4    | 0.48                                 | Protein synthesis (mitochondrial seryl-tRNA synthetase that performs seryl-tRNA aminoacylation in the mitochondria by coupling serine to seryl-tRNA)                                                      |
|     | Rsm22   | 0.49                                 | Ribosome assembly (mitochondrial ribosomal protein)                                                                                                                                                       |
| 7   | Mrpl6   | 0.43                                 | Ribosome assembly (mitochondrial ribosomal protein)                                                                                                                                                       |
|     | Pet123  | 0.44                                 | Ribosome assembly (mitochondrial ribosomal protein)                                                                                                                                                       |
|     | Tom22   | 0.44                                 | Protein import (Component of the TOM [Translocase of Outer Membrane] complex; responsible for initial import of mitochondrially directed proteins)                                                        |
|     | Mrps5   | 0.44                                 | Ribosome assembly (mitochondrial ribosomal protein)                                                                                                                                                       |
|     | Tgl2    | 0.45                                 | Lipid metabolism (triacylglycerol lipase that is localized to the mitochondria)                                                                                                                           |
|     | Fmp46   | 0.45                                 | Unknown                                                                                                                                                                                                   |
|     | Rml2    | 0.46                                 | Ribosome assembly (mitochondrial ribosomal protein)                                                                                                                                                       |
|     | Bt4     | 0.48                                 | mRNA synthesis/processing (mitochondrial mRNA maturase; forms a complex with Nam2p to mediate splicing of the bt4 intron of the COB gene)                                                                 |
|     | Kha1    | 0.48                                 | Metabolite transport (putative K <sup>+</sup> /H <sup>+</sup> antiporter)                                                                                                                                 |
|     | Ifm1    | 0.49                                 | Protein synthesis (mitochondrial translation initiation factor 2)                                                                                                                                         |

**Supplemental Table S19. Proteins that are upregulated by LCA only in *ups2Δ* cells (but not in WT or *ups1Δ* cells) are involved in various biological processes.** Mitochondria were purified from cells recovered on day 2, 4 or 7 of cell culturing with LCA. Mass spectrometry-based identification and quantitation of proteins recovered in purified mitochondria were performed as described in Materials and methods. The exponentially modified protein abundance index (emPAI) provided by the "Proteome Discoverer" software was used to calculate the relative abundance of mitochondrial proteins between *ups2Δ* cells cultured with or without LCA. Data on the relative concentrations of mitochondrial proteins are presented as means of 2 independent experiments.

| Day | Protein  | Ratio <i>ups2</i> + LCA/<br><i>ups2</i> | Biological process                                                                                                                                                                                                                                                                                                                                                                     |
|-----|----------|-----------------------------------------|----------------------------------------------------------------------------------------------------------------------------------------------------------------------------------------------------------------------------------------------------------------------------------------------------------------------------------------------------------------------------------------|
| 2   | Aac1     | 1.51                                    | Metabolite transport (mitochondrial inner membrane ADP/ATP translocator; exchanges cytosolic ADP for mitochondrially synthesized ATP)                                                                                                                                                                                                                                                  |
|     | Aim17    | 1.52                                    | Unknown                                                                                                                                                                                                                                                                                                                                                                                |
|     | Pet9     | 1.52                                    | Metabolite transport (major ADP/ATP carrier of the mitochondrial inner membrane; exchanges cytosolic ADP for mitochondrially synthesized ATP; also imports heme and ATP)                                                                                                                                                                                                               |
|     | Hem15    | 1.54                                    | Metabolite synthesis (ferrochelatase; a mitochondrial inner membrane protein, catalyzes insertion of ferrous iron into protoporphyrin IX, the eighth and final step in the heme biosynthetic pathway)                                                                                                                                                                                  |
|     | Sdh4     | 1.55                                    | TCA cycle <b>and</b> ETC/respiration (membrane anchor subunit of succinate dehydrogenase; involved in coupling the oxidation of succinate to the transfer of electrons to ubiquinone as part of the TCA cycle and t                                                                                                                                                                    |
|     | Cbp3     | 1.55                                    | Proteostasis <b>and</b> protein synthesis (mitochondrial protein required for assembly of cytochrome bc1 complex; forms a complex with Cbp6p that binds to mt ribosomes near the polypeptide tunnel exit and promotes assembly of Cbp3p-Cbp6p complex also interacts with newly synthesized cytochrome b (Cobp) and Cbp4p to promote assembly of Cobp into the cytochrome bc1 complex) |
|     | Tcb1     | 1.56                                    | Lipid metabolism (lipid-binding protein)                                                                                                                                                                                                                                                                                                                                               |
|     | Idh2     | 1.56                                    | TCA cycle (subunit of mitochondrial NAD(+)-dependent isocitrate dehydrogenase; complex catalyzes the oxidation of isocitrate to alpha-ketoglutarate in the TCA cycle)                                                                                                                                                                                                                  |
|     | Mrp13    | 1.56                                    | Ribosome assembly (mitochondrial ribosomal protein)                                                                                                                                                                                                                                                                                                                                    |
|     | Erg9     | 1.58                                    | Lipid metabolism (farnesyl-diphosphate farnesyl transferase (squalene synthase); joins two farnesyl pyrophosphate moieties to form squalene in the sterol biosynthesis pathway)                                                                                                                                                                                                        |
|     | Pos5     | 1.58                                    | Metabolite synthesis (mitochondrial NADH kinase; phosphorylates NADH; also phosphorylates NAD(+) with lower specificity)                                                                                                                                                                                                                                                               |
|     | Aim46    | 1.59                                    | Unknown                                                                                                                                                                                                                                                                                                                                                                                |
|     | YFR045 W | 1.59                                    | Unknown                                                                                                                                                                                                                                                                                                                                                                                |
|     | Mrp40    | 1.59                                    | Ribosome assembly (mitochondrial ribosomal protein)                                                                                                                                                                                                                                                                                                                                    |
|     | Mba1     | 1.59                                    | Protein synthesis (membrane-associated mitochondrial ribosome receptor; forms a complex with Mdm38p that may facilitate recruitment of mRNA-specific translational activators to ribosomes)                                                                                                                                                                                            |
|     | Opy1     | 1.60                                    | Unknown                                                                                                                                                                                                                                                                                                                                                                                |
|     | Mrp11    | 1.60                                    | Ribosome assembly (mitochondrial ribosomal protein)                                                                                                                                                                                                                                                                                                                                    |
|     | Cyt2     | 1.63                                    | Proteostasis <b>and</b> ETC/respiration (cytochrome c1 heme lyase; involved in maturation of cytochrome c1, which is a subunit of the mitochondrial ubiquinol-cytochrome-c reductase; links heme covalently to apo                                                                                                                                                                     |
|     | Gcv2     | 1.64                                    | Amino acid metabolism (P subunit of the mitochondrial glycine decarboxylase complex)                                                                                                                                                                                                                                                                                                   |
|     | Ilv1     | 1.65                                    | Amino acid metabolism (threonine deaminase, catalyzes first step in isoleucine biosynthesis)                                                                                                                                                                                                                                                                                           |
|     | Cir2     | 1.67                                    | Unknown                                                                                                                                                                                                                                                                                                                                                                                |
|     | Leu4     | 1.67                                    | Amino acid metabolism ( $\alpha$ -isopropylmalate synthase; the main isozyme responsible for the first step in the leucine biosynthesis pathway)                                                                                                                                                                                                                                       |
|     | Prx1     | 1.71                                    | Redox homeostasis (mitochondrial peroxiredoxin with thioredoxin peroxidase activity; has a role in reduction of hydroperoxides)                                                                                                                                                                                                                                                        |
|     | Aco1     | 1.71                                    | TCA cycle (aconitase)                                                                                                                                                                                                                                                                                                                                                                  |
|     | Rim1     | 1.73                                    | mtDNA replication/recombination/repair (ssDNA-binding protein essential for mitochondrial genome maintenance; involved in mitochondrial DNA replication)                                                                                                                                                                                                                               |
|     | Faa1     | 1.75                                    | Lipid metabolism (long chain fatty acyl-CoA synthetase; activates fatty acids with a preference for C12:0-C16:0 chain lengths)                                                                                                                                                                                                                                                         |
|     | Atg33    | 1.76                                    | Mitophagy (mitochondrial mitophagy-specific protein; required primarily for mitophagy induced at post-log phase)                                                                                                                                                                                                                                                                       |
|     | Tim11    | 1.76                                    | ATP synthesis (subunit e of mitochondrial F1F0-ATPase)                                                                                                                                                                                                                                                                                                                                 |
|     | Qcr10    | 1.78                                    | ETC/respiration (subunit of the ubiquinol-cytochrome c oxidoreductase complex; this complex comprises part of the mitochondrial respiratory chain)                                                                                                                                                                                                                                     |
|     | Atp17    | 1.78                                    | ATP synthesis (subunit f of the F0 sector of mitochondrial F1F0 ATP synthase)                                                                                                                                                                                                                                                                                                          |
|     | Atp5     | 1.78                                    | ATP synthesis (subunit 5 of the stator stalk of mitochondrial F1F0 ATP synthase)                                                                                                                                                                                                                                                                                                       |
|     | Afg1     | 1.81                                    | Proteostasis (protein that may act as a chaperone for cytochrome c oxidase subunits; may act as a chaperone in the degradation of misfolded or unassembled cytochrome c oxidase subunits; member of the AAA                                                                                                                                                                            |
|     | Nat2     | 1.88                                    | Unknown                                                                                                                                                                                                                                                                                                                                                                                |
|     | YNR040 W | 1.88                                    | Unknown                                                                                                                                                                                                                                                                                                                                                                                |
|     | Om45     | 1.92                                    | Unknown                                                                                                                                                                                                                                                                                                                                                                                |
|     | Fcj1     | 1.92                                    | Contact sites/cristae maintenance (component of the MICOS [Mitochondrial contact site and cristae organizing system] complex; MICOS is a mitochondrial inner membrane complex that extends into the inter                                                                                                                                                                              |
|     | Aim37    | 1.93                                    | Contact sites/cristae maintenance (component of the MICOS [Mitochondrial contact site and cristae organizing system] complex; MICOS is a mitochondrial inner membrane complex that extends into the inter                                                                                                                                                                              |
|     | YKL133 C | 1.96                                    | Unknown                                                                                                                                                                                                                                                                                                                                                                                |
|     | Yhm2     | 1.97                                    | Metabolite transport (citrate and oxoglutarate carrier protein; exports citrate from and imports oxoglutarate into the mitochondrion, causing net export of NADPH reducing equivalents)                                                                                                                                                                                                |
|     | Sdh3     | 2.00                                    | TCA cycle <b>and</b> ETC/respiration <b>and</b> Protein import (subunit of succinate dehydrogenase and of TIM22 translocase; functions as cytochrome b subunit of succinate dehydrogenase, which couples oxidation of ubiquinone as part of the TCA cycle and the mitochondrial respiratory chain)                                                                                     |
|     | Ilv5     | 2.01                                    | Amino acid metabolism <b>and</b> mtDNA replication/recombination/repair (acetohydroxyacid reductoisomerase and mtDNA binding protein; involved in branched-chain amino acid biosynthesis and maintenance of mitochondrial nucleoids)                                                                                                                                                   |
|     | Shy1     | 2.01                                    | Proteostasis (mitochondrial inner membrane protein required for complex IV assembly; associates with complex IV assembly intermediates and complex III/complex IV supercomplexes)                                                                                                                                                                                                      |
|     | Bna4     | 2.07                                    | Metabolite synthesis (kynurenine 3-monooxygenase; required for the de novo biosynthesis of NAD from tryptophan via kynurenine)                                                                                                                                                                                                                                                         |
|     | Phb1     | 2.09                                    | Proteostasis (subunit of the prohibitin complex (Phb1p-Phb2p); prohibitin is an inner mitochondrial membrane chaperone that stabilizes newly synthesized proteins)                                                                                                                                                                                                                     |
|     | Isc1     | 2.10                                    | Lipid metabolism (inositol phosphosphingolipid phospholipase C; hydrolyzes complex sphingolipids to produce ceramide)                                                                                                                                                                                                                                                                  |
|     | Aim18    | 2.14                                    | Unknown                                                                                                                                                                                                                                                                                                                                                                                |
|     | Ypt7     | 2.16                                    | Mitochondria/vacuoles contact site (Rab family GTPase; localizes to sites of contact between the vacuole and mitochondria)                                                                                                                                                                                                                                                             |
|     | Cyt1     | 2.17                                    | ETC/respiration (cytochrome c1; component of the mitochondrial respiratory chain)                                                                                                                                                                                                                                                                                                      |
|     | She9     | 2.17                                    | Unknown                                                                                                                                                                                                                                                                                                                                                                                |
|     | Tom20    | 2.19                                    | Protein import (component of the TOM (translocase of outer membrane) complex; responsible for recognition and initial import steps for all mitochondrially directed proteins; acts as a receptor for incoming p                                                                                                                                                                        |
|     | Ymr31    | 2.25                                    | TCA cycle (subunit of the mitochondrial $\alpha$ -ketoglutarate dehydrogenase)                                                                                                                                                                                                                                                                                                         |
|     | Atp10    | 2.26                                    | Proteostasis <b>and</b> ATP synthesis (assembly factor for the F0 sector of mitochondrial F1F0 ATP synthase)                                                                                                                                                                                                                                                                           |
|     | Yim1     | 2.28                                    | Unknown                                                                                                                                                                                                                                                                                                                                                                                |
|     | Rip1     | 2.28                                    | ETC/respiration (ubiquinol-cytochrome-c reductase; a Rieske iron-sulfur protein of the mitochondrial cytochrome bc1 complex; transfers electrons from ubiquinol to cytochrome c1 during respiration)                                                                                                                                                                                   |
|     | Fmp45    | 2.29                                    | Unknown                                                                                                                                                                                                                                                                                                                                                                                |
|     | Ugo1     | 2.31                                    | Mitochondrial fusion (outer membrane component of the mitochondrial fusion machinery)                                                                                                                                                                                                                                                                                                  |
|     | Mcr1     | 2.45                                    | Lipid metabolism (mitochondrial NADH-cytochrome b5 reductase; involved in ergosterol biosynthesis)                                                                                                                                                                                                                                                                                     |
|     | Cbp4     | 2.52                                    | Proteostasis <b>and</b> ETC/respiration (mitochondrial protein required for assembly of cytochrome bc1 complex; interacts with the Cbp3p-Cbp6p complex and newly synthesized cytochrome b (Cobp) to promote a                                                                                                                                                                          |
|     | Fsf1     | 2.62                                    | Unknown                                                                                                                                                                                                                                                                                                                                                                                |
|     | Atp15    | 2.78                                    | ATP synthesis (epsilon subunit of the F1 sector of mitochondrial F1F0 ATP synthase)                                                                                                                                                                                                                                                                                                    |
|     | Idp1     | 2.85                                    | Amino acid metabolism (mitochondrial NADP-specific isocitrate dehydrogenase; catalyzes the oxidation of isocitrate to $\alpha$ -ketoglutarate; not required for mitochondrial respiration; diverts $\alpha$ -ketoglutarate to gl                                                                                                                                                       |
|     | Mcp2     | 3.21                                    | Lipid metabolism (mitochondrial protein involved in lipid homeostasis; non-essential gene which interacts genetically with MDM10, and other members of the ERMES complex)                                                                                                                                                                                                              |
|     | Psd1     | 3.24                                    | Lipid metabolism (phosphatidylserine decarboxylase of the mitochondrial inner membrane; converts phosphatidylserine to phosphatidylethanolamine)                                                                                                                                                                                                                                       |
|     | Bcs1     | 3.27                                    | Proteostasis <b>and</b> ETC/respiration (chaperone required for Complex III assembly; member of the AAA ATPase family; also required for assembly of the Qcr10p subunit)                                                                                                                                                                                                               |
|     | Mrp135   | 3.27                                    | Ribosome assembly (mitochondrial ribosomal protein)                                                                                                                                                                                                                                                                                                                                    |

|   |             |      |                                                                                                                                                                                                                   |
|---|-------------|------|-------------------------------------------------------------------------------------------------------------------------------------------------------------------------------------------------------------------|
|   | Tim17       | 4.10 | Protein import (essential component of the TIM23 complex; with Tim23p, contributes to the architecture and function of the import channel; may link the import motor to the core translocase of the inner mito    |
|   | Oxa1        | 4.13 | Proteostasis (mitochondrial inner membrane insertase; mediates the insertion of both mitochondrial- and nuclear-encoded proteins from the matrix into the inner membrane; also has a role in insertion of carrier |
|   | Qcr8        | 5.10 | ETC/respiration (subunit 8 of ubiquinol cytochrome-c reductase (Complex III); Complex III is a component of the mitochondrial inner membrane electron transport chain)                                            |
|   | Atp7        | 5.35 | ATP synthesis (subunit d of the stator stalk of mitochondrial F1F0 ATP synthase)                                                                                                                                  |
|   | Pam18       | 9.63 | Protein import (subunit of the import motor (PAM complex); the PAM complex is a component of the Translocase of the Inner Mitochondrial membrane (TIM23 complex); essential J-protein co-chaperone tha            |
| 4 | Arg7        | 1.51 | Amino acid metabolism (mitochondrial ornithine acetyltransferase; catalyzes the fifth step in arginine biosynthesis)                                                                                              |
|   | Leu4        | 1.51 | Amino acid metabolism ( $\alpha$ -isopropylmalate synthase; the main isozyme responsible for the first step in the leucine biosynthesis pathway)                                                                  |
|   | Ggc1        | 1.51 | Metabolite transport (mitochondrial GTP/GDP transporter; has a role in mitochondrial iron transport)                                                                                                              |
|   | Mrp1        | 1.52 | Ribosome assembly (mitochondrial ribosomal protein)                                                                                                                                                               |
|   | Tdh2        | 1.52 | Carbohydrate metabolism (glyceraldehyde-3-phosphate dehydrogenase, isozyme 2; involved in glycolysis and gluconeogenesis)                                                                                         |
|   | Pim1        | 1.54 | Proteostasis (ATP-dependent Lon protease; involved in degradation of misfolded proteins in mitochondria)                                                                                                          |
|   | Aco2        | 1.55 | TCA cycle (mitochondrial aconitase isozyme; similarity to Aco1, an aconitase required for the TCA cycle)                                                                                                          |
|   | Mrx10       | 1.58 | Ribosome assembly (mitochondrial ribosomal protein)                                                                                                                                                               |
|   | Cor1        | 1.59 | ETC/respiration (core subunit of the ubiquinol-cytochrome c reductase complex; the ubiquinol-cytochrome c reductase complex (bc1 complex) is a component of the mitochondrial inner membrane electron tra         |
|   | Rim2        | 1.59 | Metabolite transport (mitochondrial pyrimidine nucleotide transporter; imports pyrimidine nucleoside triphosphates and exports pyrimidine nucleoside monophosphates)                                              |
|   | Tcb1        | 1.60 | Lipid metabolism (lipid-binding protein)                                                                                                                                                                          |
|   | Uip4        | 1.60 | Unknown                                                                                                                                                                                                           |
|   | Mct1        | 1.60 | Lipid metabolism (malonyl-CoA:ACP transferase; component of a type-II mitochondrial fatty acid synthase that produces intermediates for phospholipid remodeling)                                                  |
|   | Odc2        | 1.62 | Metabolite transport (mitochondrial inner membrane transporter; 2-oxodicarboxylate transporter, exports 2-oxoadipate and 2-oxoglutarate from the mitochondrial matrix to the cytosol)                             |
|   | Mcp1        | 1.63 | Lipid metabolism (mitochondrial protein involved in lipid homeostasis; interacts genetically with MDM10 and other members of the ERMES complex)                                                                   |
|   | Pdx1        | 1.63 | Carbohydrate metabolism (E3-binding protein of the mitochondrial pyruvate dehydrogenase complex)                                                                                                                  |
|   | Ssq1        | 1.64 | Proteostasis (mitochondrial hsp70-type molecular chaperone; required for assembly of iron/sulfur clusters into proteins at a step after cluster synthesis)                                                        |
|   | Ecm10       | 1.65 | Protein import and Proteostasis (heat shock protein of the Hsp70 family; plays a role in protein translocation)                                                                                                   |
|   | Cem1        | 1.68 | Lipid metabolism (mitochondrial beta-keto-acyl synthase; possible role in fatty acid synthesis)                                                                                                                   |
|   | Yme2        | 1.69 | mtDNA replication/recombination/repair (integral inner mitochondrial membrane protein; role in maintaining mitochondrial nucleoid structure and number)                                                           |
|   | Pet9        | 1.69 | Metabolite transport (major ADP/ATP carrier of the mitochondrial inner membrane; exchanges cytosolic ADP for mitochondrially synthesized ATP; also imports heme and ATP)                                          |
|   | Ilv1        | 1.72 | Amino acid metabolism (threonine deaminase, catalyzes first step in isoleucine biosynthesis)                                                                                                                      |
|   | Mdm38       | 1.72 | Protein synthesis (forms a complex with Mba1p to facilitate recruitment of mRNA-specific translational activators to ribosomes)                                                                                   |
|   | Phb2        | 1.73 | Proteostasis (subunit of the prohibitin complex (Phb1p-Phb2p); prohibitin is an inner mitochondrial membrane chaperone that stabilizes newly synthesized proteins)                                                |
|   | Rmd9        | 1.73 | Protein synthesis (mutant phenotype and genetic interactions suggest a role in delivering mt mRNAs to ribosomes; located on matrix face of the inner membrane and loosely associated with mitoribosomes)          |
|   | Isd11       | 1.73 | Metabolite synthesis (cysteine desulfurase activator; required for mitochondrial iron-sulfur cluster biosynthesis)                                                                                                |
|   | Lsc1        | 1.73 | TCA cycle ( $\alpha$ subunit of succinyl-CoA ligase; succinyl-CoA ligase is a mitochondrial enzyme of the TCA cycle that catalyzes the nucleotide-dependent conversion of succinyl-CoA to succinate)              |
|   | YGR266<br>W | 1.74 | Unknown                                                                                                                                                                                                           |
|   | Cox2        | 1.76 | ETC/respiration (subunit II of cytochrome c oxidase (Complex IV); Complex IV is the terminal member of the mitochondrial inner membrane electron transport chain)                                                 |
|   | Mrp13       | 1.76 | Ribosome assembly (mitochondrial ribosomal protein)                                                                                                                                                               |
|   | Pdb1        | 1.76 | Carbohydrate metabolism (E1 beta subunit of the pyruvate dehydrogenase (PDH) complex)                                                                                                                             |
|   | Atp3        | 1.76 | ATP synthesis (gamma subunit of the F1 sector of mitochondrial F1F0 ATP synthase)                                                                                                                                 |
|   | YDR061<br>W | 1.77 | Unknown                                                                                                                                                                                                           |
|   | Lat1        | 1.77 | Carbohydrate metabolism (dihydrolipoamide acetyltransferase component (E2) of the pyruvate dehydrogenase complex)                                                                                                 |
|   | Atp7        | 1.79 | ATP synthesis (subunit d of the stator stalk of mitochondrial F1F0 ATP synthase)                                                                                                                                  |
|   | Aim24       | 1.82 | Unknown                                                                                                                                                                                                           |
|   | Hfd1        | 1.83 | Metabolite synthesis and Lipid metabolism (dehydrogenase involved in ubiquinone and sphingolipid metabolism; oxidizes 4-hydroxybenzaldehyde into 4-hydroxybenzoic acid in ubiquinone biosynthesis; con            |
|   | Rip1        | 1.85 | ETC/respiration (ubiquinol-cytochrome-c reductase; a Rieske iron-sulfur protein of the mitochondrial cytochrome bc1 complex; transfers electrons from ubiquinol to cytochrome c1 during respiration)              |
|   | Aim9        | 1.86 | Unknown                                                                                                                                                                                                           |
|   | Msc6        | 1.87 | Protein synthesis (multicopy suppressor of HER2 involved in mitochondrial translation)                                                                                                                            |
|   | Cat2        | 1.88 | Metabolite transport (carnitine acetyl-CoA transferase; transfers activated acetyl groups to carnitine to form acetylcarnitine which can be shuttled across membranes)                                            |
|   | Qcr2        | 1.89 | ETC/respiration (subunit 2 of ubiquinol cytochrome-c reductase (Complex III), a component of the mitochondrial inner membrane electron transport chain)                                                           |
|   | Put2        | 1.89 | Amino acid metabolism (delta-1-pyrroline-5-carboxylate dehydrogenase; nuclear-encoded mitochondrial protein involved in utilization of proline as sole nitrogen source)                                           |
|   | Nde2        | 1.93 | ETC/respiration (mitochondrial external NADH dehydrogenase; catalyzes the oxidation of cytosolic NADH; provides the cytosolic NADH to the mitochondrial respiratory chain)                                        |
|   | Mrx3        | 1.93 | Unknown                                                                                                                                                                                                           |
|   | Nfu1        | 1.93 | Proteostasis (protein involved in Fe-S cluster transfer to mitochondrial clients)                                                                                                                                 |
|   | Sdh1        | 1.94 | TCA cycle and ETC/respiration (flavoprotein subunit of succinate dehydrogenase; couples the oxidation of succinate to the transfer of electrons to ubiquinone as part of the TCA cycle and the mitochondrial re   |
|   | Mir1        | 1.96 | Metabolite transport (mitochondrial phosphate carrier; imports inorganic phosphate into mitochondria)                                                                                                             |
|   | Mae1        | 1.97 | Carbohydrate metabolism and Amino acid metabolism (mitochondrial malic enzyme; catalyzes the oxidative decarboxylation of malate to pyruvate, which is a key intermediate in sugar metabolism and a prec          |
|   | Afg1        | 1.97 | Proteostasis (protein that may act as a chaperone for cytochrome c oxidase subunits; may act as a chaperone in the degradation of misfolded or unassembled cytochrome c oxidase subunits; member of the AAA       |
|   | YJL045<br>W | 1.99 | ETC/respiration (minor succinate dehydrogenase isozyme; participates in oxidation of succinate and transfer of electrons to ubiquinone)                                                                           |
|   | Tom40       | 1.99 | Protein import (component of the TOM (translocase of outer membrane) complex; responsible for recognition and initial import steps for all mitochondrially directed proteins)                                     |
|   | Alo1        | 2.01 | Redox homeostasis (D-Arabinono-1,4-lactone oxidase; catalyzes the final step in biosynthesis of dehydro-D-arabinono-1,4-lactone, which is protective against oxidative stress)                                    |
|   | Bat1        | 2.01 | Amino acid metabolism (mitochondrial branched-chain amino acid (BCAA) aminotransferase involved in BCAA biosynthesis)                                                                                             |
|   | Tom71       | 2.01 | Protein import (component of the TOM (translocase of outer membrane) complex responsible for recognition and import of mitochondrially directed proteins)                                                         |
|   | Cox20       | 2.03 | Proteostasis (mitochondrial inner membrane protein; required for proteolytic processing of Cox2p and its assembly into cytochrome c oxidase)                                                                      |
|   | Etr1        | 2.05 | Lipid metabolism (mitochondrial 2-enoyl thioester reductase; member of the medium chain dehydrogenase/reductase family; is involved in fatty acid synthesis)                                                      |
|   | Mdm32       | 2.06 | mtDNA replication/recombination/repair (mitochondrial inner membrane protein required for normal mitochondrial morphology and stability of mtDNA)                                                                 |
|   | Pet127      | 2.06 | mRNA synthesis/processing (protein with a role in 5'-end processing of mitochondrial RNAs)                                                                                                                        |
|   | Afg3        | 2.06 | Proteostasis (Mitochondrial inner membrane m-AAA protease component; mediates degradation of misfolded or unassembled proteins; also required for correct assembly of mitochondrial enzyme complexes)             |
|   | Kgd1        | 2.07 | TCA cycle (subunit of the mitochondrial alpha-ketoglutarate dehydrogenase complex; catalyzes a key step in the tricarboxylic acid (TCA) cycle, the oxidative decarboxylation of alpha-ketoglutarate to form su    |
|   | Cbp2        | 2.07 | mRNA synthesis/processing (required for splicing of the group I intron bl5 of the COB pre-mRNA; nuclear-encoded mitochondrial protein that binds to the RNA to promote splicing)                                  |
|   | Ubp16       | 2.08 | Proteostasis (deubiquitinating enzyme anchored to the outer mitochondrial membrane)                                                                                                                               |
|   | Nuc1        | 2.09 | mtDNA replication/recombination/repair (major mitochondrial nuclease; roles in mitochondrial recombination, apoptosis and maintenance of ploidy; involved in fragmentation of genomic DNA during PN               |
|   | Lys4        | 2.09 | Amino acid metabolism (homoaconitase; catalyzes the conversion of homocitrate to homoisocitrate, which is a step in the lysine biosynthesis pathway)                                                              |
|   | Hsp60       | 2.10 | Proteostasis (tetradecameric mitochondrial chaperonin; required for ATP-dependent folding of precursor polypeptides and complex assembly; prevents aggregation and mediates protein refolding after heat sho      |
|   | Ecm31       | 2.12 | Metabolite synthesis (ketopantoate hydroxymethyltransferase; required for pantothenic acid and acetyl-CoA biosynthesis)                                                                                           |
|   | Cyt1        | 2.13 | ETC/respiration (cytochrome c1; component of the mitochondrial respiratory chain)                                                                                                                                 |
|   | Cox13       | 2.17 | ETC/respiration and Proteostasis (subunit VIa of cytochrome c oxidase; present in a subclass of cytochrome c oxidase complexes that may have a role in minimizing generation of reactive oxygen species; not      |
|   | Ysa1        | 2.19 | Metabolite synthesis (nudix hydrolase family member with ADP-ribose pyrophosphatase activity; shown to metabolize O-acetyl-ADP-ribose to AMP and acetylated ribose 5'-phosphate)                                  |
|   | Rsm10       | 2.19 | Ribosome assembly (mitochondrial ribosomal protein)                                                                                                                                                               |
|   | Atp1        | 2.20 | ATP synthesis ( $\alpha$ subunit of the F1 sector of mitochondrial F1F0 ATP synthase)                                                                                                                             |
|   | Atp2        | 2.20 | ATP synthesis ( $\beta$ subunit of the F1 sector of mitochondrial F1F0 ATP synthase)                                                                                                                              |
|   | YNL200<br>C | 2.21 | Metabolite synthesis (NADHX epimerase; catalyzes isomerization of (R)- and (S)-NADHX)                                                                                                                             |
|   | YBL059<br>W | 2.21 | Unknown                                                                                                                                                                                                           |
|   | Ysc83       | 2.23 | Unknown                                                                                                                                                                                                           |
|   | Cpr1        | 2.23 | Proteostasis (cytoplasmic peptidyl-prolyl cis-trans isomerase (cyclophilin); catalyzes the cis-trans isomerization of peptide bonds N-terminal to proline residues)                                               |
|   | Aim19       | 2.26 | Unknown                                                                                                                                                                                                           |
|   | Yta12       | 2.26 | Proteostasis (mitochondrial inner membrane m-AAA protease component; mediates degradation of misfolded or unassembled proteins; also required for correct assembly of mitochondrial enzyme complexes)             |

|          |      |                                                                                                                                                                                                                                                                                                                                                             |
|----------|------|-------------------------------------------------------------------------------------------------------------------------------------------------------------------------------------------------------------------------------------------------------------------------------------------------------------------------------------------------------------|
| Ilv3     | 2.27 | Amino acid metabolism (dihydroxyacid dehydratase; catalyzes third step in the common pathway leading to biosynthesis of branched-chain amino acids)                                                                                                                                                                                                         |
| YDL183 C | 2.28 | Metabolite transport (protein that may form an active mitochondrial K <sup>+</sup> /H <sup>+</sup> exchanger system)                                                                                                                                                                                                                                        |
| Aim45    | 2.29 | Unknown                                                                                                                                                                                                                                                                                                                                                     |
| Ssc1     | 2.33 | Protein import <b>and</b> Proteostasis (Hsp70 family ATPase; constituent of the import motor component of the Translocase of the Inner Mitochondrial membrane (TIM23 complex); involved in protein translocation)                                                                                                                                           |
| Mgm101   | 2.34 | mtDNA replication/recombination/repair (Protein with a role in mitochondrial DNA recombinational repair; also involved in interstrand cross-link repair; component of the mitochondrial nucleoid, required for mitochondrial genome maintenance)                                                                                                            |
| Hem15    | 2.36 | Metabolite synthesis (ferrochelatase; a mitochondrial inner membrane protein, catalyzes insertion of ferrous iron into protoporphyrin IX, the eighth and final step in the heme biosynthetic pathway)                                                                                                                                                       |
| Por1     | 2.44 | Metabolite transport (mitochondrial porin (voltage-dependent anion channel); outer membrane protein required for maintenance of mitochondrial osmotic stability and mitochondrial membrane permeability)                                                                                                                                                    |
| Mdh1     | 2.45 | TCA cycle (mitochondrial malate dehydrogenase; catalyzes interconversion of malate and oxaloacetate; involved in the tricarboxylic acid (TCA) cycle)                                                                                                                                                                                                        |
| Cox5A    | 2.52 | ETC/respiration (Subunit Va of cytochrome c oxidase, the terminal member of the mitochondrial inner membrane electron transport chain)                                                                                                                                                                                                                      |
| Yju3     | 2.55 | Lipid metabolism (monoglyceride lipase)                                                                                                                                                                                                                                                                                                                     |
| Tom70    | 2.59 | Protein import (component of the TOM (translocase of outer membrane) complex; involved in the recognition and initial import steps for all mitochondrially directed proteins)                                                                                                                                                                               |
| Num1     | 2.60 | Mitochondria/ER contact sites (component of the mitochondria-ER-cortex-anchor (MECA); required for the association of mitochondria with the cell cortex; interacts with Mdm36p to link the ER and mitochondria)                                                                                                                                             |
| Nde1     | 2.61 | ETC/respiration (mitochondrial external NADH dehydrogenase; provides cytosolic NADH to the mitochondrial respiratory chain)                                                                                                                                                                                                                                 |
| Mrps9    | 2.72 | Ribosome assembly (mitochondrial ribosomal protein)                                                                                                                                                                                                                                                                                                         |
| Adh3     | 2.74 | Carbohydrate metabolism (mitochondrial NAD-dependent alcohol dehydrogenase involved in NADH oxidation)                                                                                                                                                                                                                                                      |
| Mcr1     | 2.78 | Lipid metabolism (mitochondrial NADH-cytochrome b5 reductase; involved in ergosterol biosynthesis)                                                                                                                                                                                                                                                          |
| Atg33    | 2.78 | Mitophagy (mitochondrial mitophagy-specific protein; required primarily for mitophagy induced at post-log phase)                                                                                                                                                                                                                                            |
| Tim50    | 2.79 | Protein import (acts as receptor for the translocase of the inner mitochondrial membrane (TIM23) complex guiding incoming precursors from the TOM complex)                                                                                                                                                                                                  |
| Cpr3     | 2.85 | Proteostasis (mitochondrial peptidyl-prolyl cis-trans isomerase (cyclophilin); catalyzes the cis-trans isomerization of peptide bonds N-terminal to proline residues)                                                                                                                                                                                       |
| Mgr1     | 2.87 | Proteostasis (subunit of the mitochondrial (mt) i-AAA protease supercomplex; i-AAA degrades misfolded mitochondrial proteins)                                                                                                                                                                                                                               |
| Fmp30    | 2.87 | Lipid metabolism (involved in maintaining normal cardiolipin levels)                                                                                                                                                                                                                                                                                        |
| Pdh1     | 2.88 | ETC/respiration (2-methylcitrate dehydratase; participates in respiration)                                                                                                                                                                                                                                                                                  |
| Faa1     | 2.88 | Lipid metabolism (long chain fatty acyl-CoA synthetase; activates fatty acids with a preference for C12:0-C16:0 chain lengths)                                                                                                                                                                                                                              |
| Ndi1     | 2.95 | ETC/respiration (NADH:ubiquinone oxidoreductase; transfers electrons from NADH to ubiquinone in respiratory chain)                                                                                                                                                                                                                                          |
| Lys12    | 3.01 | Amino acid metabolism (homo-isocitrate dehydrogenase; an NAD-linked mitochondrial enzyme required for the fourth step in the biosynthesis of lysine)                                                                                                                                                                                                        |
| Pil1     | 3.03 | Unknown                                                                                                                                                                                                                                                                                                                                                     |
| Mge1     | 3.04 | Proteostasis <b>and</b> Protein import (mitochondrial matrix co-chaperone; nucleotide release factor for Ssc1p in protein translocation and folding; also acts as co-chaperone for Ssq1p in folding of Fe-S cluster proteins)                                                                                                                               |
| Agx1     | 3.04 | Amino acid metabolism (alanine:glyoxylate aminotransferase (AGT); catalyzes the synthesis of glycine from glyoxylate)                                                                                                                                                                                                                                       |
| Tuf1     | 3.21 | Protein synthesis <b>and</b> mtDNA replication/recombination/repair (multicopy suppressor of HER2 involved in mitochondrial translation)                                                                                                                                                                                                                    |
| Cox4     | 3.27 | ETC/respiration (subunit IV of cytochrome c oxidase; the terminal member of the mitochondrial inner membrane electron transport chain)                                                                                                                                                                                                                      |
| Sur7     | 3.30 | Unknown                                                                                                                                                                                                                                                                                                                                                     |
| Aim32    | 3.35 | Unknown                                                                                                                                                                                                                                                                                                                                                     |
| Mdh3     | 3.36 | Carbohydrate metabolism (malate dehydrogenase; catalyzes interconversion of malate and oxaloacetate; involved in the glyoxylate cycle)                                                                                                                                                                                                                      |
| Cox1     | 3.44 | ETC/respiration (subunit I of cytochrome c oxidase (Complex IV); Complex IV is the terminal member of the mitochondrial inner membrane electron transport chain)                                                                                                                                                                                            |
| Her2     | 3.52 | Protein synthesis (glutamyl-tRNA synthase)                                                                                                                                                                                                                                                                                                                  |
| Ach1     | 3.55 | Carbohydrate metabolism (protein with CoA transferase activity; particularly for CoASH transfer from succinyl-CoA to acetate)                                                                                                                                                                                                                               |
| Dld1     | 3.99 | Carbohydrate metabolism (major mitochondrial D-lactate dehydrogenase; oxidizes D-lactate to pyruvate)                                                                                                                                                                                                                                                       |
| Pam18    | 4.10 | Protein import (subunit of the import motor (PAM complex); the PAM complex is a component of the Translocase of the Inner Mitochondrial membrane (TIM23 complex); essential J-protein co-chaperone for import)                                                                                                                                              |
| Idp1     | 4.24 | Amino acid metabolism (mitochondrial NADP-specific isocitrate dehydrogenase; catalyzes the oxidation of isocitrate to $\alpha$ -ketoglutarate; not required for mitochondrial respiration; diverts $\alpha$ -ketoglutarate to gluconeogenesis)                                                                                                              |
| Aim46    | 4.71 | Unknown                                                                                                                                                                                                                                                                                                                                                     |
| Om45     | 9.15 | Unknown                                                                                                                                                                                                                                                                                                                                                     |
| 7        |      |                                                                                                                                                                                                                                                                                                                                                             |
| Sdh2     | 1.53 | ETC/respiration <b>and</b> TCA cycle (iron-sulfur protein subunit of succinate dehydrogenase; the complex couples the oxidation of succinate to the transfer of electrons to ubiquinone as part of the TCA cycle and the ETC)                                                                                                                               |
| Sls1     | 1.55 | mRNA synthesis/processing (mitochondrial membrane protein; coordinates expression of mitochondrially-encoded genes)                                                                                                                                                                                                                                         |
| Arg7     | 1.55 | Amino acid metabolism (mitochondrial ornithine acetyltransferase; catalyzes the fifth step in arginine biosynthesis)                                                                                                                                                                                                                                        |
| Mst1     | 1.55 | Protein synthesis (mitochondrial threonyl-tRNA synthetase)                                                                                                                                                                                                                                                                                                  |
| Glr1     | 1.55 | Redox homeostasis (glutathione oxidoreductase; converts oxidized glutathione to reduced glutathione)                                                                                                                                                                                                                                                        |
| Ald6     | 1.56 | Carbohydrate metabolism (aldehyde dehydrogenase; required for conversion of acetaldehyde to acetate; locates to the mitochondrial outer surface upon oxidative stress)                                                                                                                                                                                      |
| Atp4     | 1.58 | ATP synthesis (subunit b of the stator stalk of mitochondrial F1F0 ATP synthase)                                                                                                                                                                                                                                                                            |
| Ysc83    | 1.58 | Unknown                                                                                                                                                                                                                                                                                                                                                     |
| Mrp13    | 1.59 | Ribosome assembly (mitochondrial ribosomal protein)                                                                                                                                                                                                                                                                                                         |
| Fmp41    | 1.61 | Unknown                                                                                                                                                                                                                                                                                                                                                     |
| Mrx3     | 1.61 | Unknown                                                                                                                                                                                                                                                                                                                                                     |
| Tim21    | 1.61 | Protein import (component of the TIM23 complex; interacts with the Translocase of the Outer Mitochondrial membrane (TOM complex); may regulate the Translocase of the Inner Mitochondrial membrane (TIM23 complex))                                                                                                                                         |
| Ort1     | 1.62 | Metabolite transport <b>and</b> Amino acid metabolism (ornithine transporter of the mitochondrial inner membrane; exports ornithine from mitochondria as part of arginine biosynthesis)                                                                                                                                                                     |
| Hem15    | 1.63 | Metabolite synthesis (ferrochelatase; a mitochondrial inner membrane protein, catalyzes insertion of ferrous iron into protoporphyrin IX, the eighth and final step in the heme biosynthetic pathway)                                                                                                                                                       |
| Ypt7     | 1.63 | Mitochondria/vacuoles contact site (Rab family GTPase; localizes to sites of contact between the vacuole and mitochondria)                                                                                                                                                                                                                                  |
| Ndi1     | 1.67 | ETC/respiration (NADH:ubiquinone oxidoreductase; transfers electrons from NADH to ubiquinone in respiratory chain)                                                                                                                                                                                                                                          |
| Mss51    | 1.67 | Protein synthesis <b>and</b> Proteostasis (specific translational activator for the mitochondrial COX1 mRNA; influences both COX1 mRNA translation and Cox1p assembly into cytochrome c oxidase)                                                                                                                                                            |
| Dic1     | 1.69 | Metabolite transport (mitochondrial dicarboxylate carrier; integral membrane protein, catalyzes a dicarboxylate-phosphate exchange across the inner mitochondrial membrane, transports cytoplasmic dicarboxylates into mitochondria)                                                                                                                        |
| Pet9     | 1.70 | Metabolite transport (major ADP/ATP carrier of the mitochondrial inner membrane; exchanges cytosolic ADP for mitochondrially synthesized ATP; also imports heme and ATP)                                                                                                                                                                                    |
| Tom40    | 1.73 | Protein import (component of the TOM (translocase of outer membrane) complex; responsible for recognition and initial import steps for all mitochondrially directed proteins)                                                                                                                                                                               |
| Rim1     | 1.73 | mtDNA replication/recombination/repair (ssDNA-binding protein essential for mitochondrial genome maintenance; involved in mitochondrial DNA replication)                                                                                                                                                                                                    |
| Yme2     | 1.74 | mtDNA replication/recombination/repair (role in maintaining mitochondrial nucleoid structure and number; mutants exhibit an increased rate of mitochondrial DNA escape)                                                                                                                                                                                     |
| YGR266 W | 1.74 | Unknown                                                                                                                                                                                                                                                                                                                                                     |
| Tom71    | 1.76 | Protein import (component of the TOM (translocase of outer membrane) complex responsible for recognition and import of mitochondrially directed proteins)                                                                                                                                                                                                   |
| Atp20    | 1.76 | ATP synthesis (subunit g of the mitochondrial F1F0 ATP synthase)                                                                                                                                                                                                                                                                                            |
| Coq8     | 1.77 | Metabolite synthesis (ATPase required for ubiquinone biosynthesis and respiratory growth; maintains levels of ubiquinone biosynthetic proteins; binds to ubiquinone biosynthesis intermediates)                                                                                                                                                             |
| Qcr10    | 1.78 | ETC/respiration (subunit of the ubiquinol-cytochrome c oxidoreductase complex; this complex comprises part of the mitochondrial respiratory chain)                                                                                                                                                                                                          |
| Atp5     | 1.78 | ATP synthesis (subunit 5 of the stator stalk of mitochondrial F1F0 ATP synthase)                                                                                                                                                                                                                                                                            |
| Fmp30    | 1.83 | Lipid metabolism (involved in maintaining normal cardiolipin levels)                                                                                                                                                                                                                                                                                        |
| Dld1     | 1.85 | Carbohydrate metabolism (major mitochondrial D-lactate dehydrogenase; oxidizes D-lactate to pyruvate)                                                                                                                                                                                                                                                       |
| Erg6     | 1.90 | Lipid metabolism (delta(24)-sterol C-methyltransferase; converts zymosterol to fecosterol in the ergosterol biosynthetic pathway by methylating position C-24)                                                                                                                                                                                              |
| Idp1     | 1.92 | Amino acid metabolism (mitochondrial NADP-specific isocitrate dehydrogenase; catalyzes the oxidation of isocitrate to $\alpha$ -ketoglutarate; not required for mitochondrial respiration; diverts $\alpha$ -ketoglutarate to gluconeogenesis)                                                                                                              |
| Rrf1     | 1.93 | Protein synthesis <b>and</b> ETC/respiration (mitochondrial ribosome recycling factor; essential for mitochondrial protein synthesis and for the maintenance of the respiratory function of mitochondria)                                                                                                                                                   |
| Ayr1     | 1.94 | Lipid metabolism (bifunctional triacylglycerol lipase and 1-acyl DHAP reductase; NADPH-dependent 1-acyl dihydroxyacetone phosphate reductase involved in phosphatidic acid biosynthesis)                                                                                                                                                                    |
| Osm1     | 1.97 | Carbohydrate metabolism <b>and</b> Redox homeostasis (fumarate reductase, catalyzes the reduction of fumarate to succinate; required for the reoxidation of intracellular NADH under anaerobic conditions)                                                                                                                                                  |
| Cbp6     | 2.00 | Protein synthesis <b>and</b> Proteostasis (required for translation of the COB mRNA; forms a complex with Cbp3p that binds to mt ribosomes near the polypeptide tunnel exit and promotes efficient translation of the COB mRNA; interacts with newly synthesized cytochrome b (Cobp) and Cbp4p to promote assembly of Cobp into the cytochrome bc1 complex) |
| Qcr7     | 2.04 | ETC/respiration (subunit 7 of ubiquinol cytochrome-c reductase (Complex III); Complex III is a component of the mitochondrial inner membrane electron transport chain)                                                                                                                                                                                      |
| Gpd2     | 2.09 | Carbohydrate metabolism (NAD-dependent glycerol 3-phosphate dehydrogenase involved in glycerol biosynthesis)                                                                                                                                                                                                                                                |
| Mrp1     | 2.12 | Ribosome assembly (mitochondrial ribosomal protein)                                                                                                                                                                                                                                                                                                         |
| Abf2     | 2.13 | mtDNA replication/recombination/repair (mitochondrial DNA-binding protein; involved in mitochondrial DNA replication and recombination)                                                                                                                                                                                                                     |
| Fzo1     | 2.14 | Mitochondrial fusion (mitofusin; integral membrane protein involved in mitochondrial outer membrane tethering and fusion)                                                                                                                                                                                                                                   |
| Uip4     | 2.15 | Unknown                                                                                                                                                                                                                                                                                                                                                     |
| Lsb3     | 2.19 | Unknown                                                                                                                                                                                                                                                                                                                                                     |
| Yro2     | 2.19 | Unknown                                                                                                                                                                                                                                                                                                                                                     |
| Isc1     | 2.21 | Lipid metabolism (inositol phosphosphingolipid phospholipase C; hydrolyzes complex sphingolipids to produce ceramide)                                                                                                                                                                                                                                       |

|         |      |                                                                                                                                                                                                                                                                                                                                                                                                                |
|---------|------|----------------------------------------------------------------------------------------------------------------------------------------------------------------------------------------------------------------------------------------------------------------------------------------------------------------------------------------------------------------------------------------------------------------|
| Pnt1    | 2.26 | Proteostasis (mitochondrial integral inner membrane protein; involved in membrane insertion of C-terminus of Cox2p)                                                                                                                                                                                                                                                                                            |
| Aim19   | 2.26 | Unknown                                                                                                                                                                                                                                                                                                                                                                                                        |
| Yim1    | 2.28 | Unknown                                                                                                                                                                                                                                                                                                                                                                                                        |
| Aim37   | 2.31 | Contact sites/cristae maintenance (component of the MICOS [Mitochondrial contact site and cristae organizing system] complex; MICOS is a mitochondrial inner membrane complex that extends into the intermembrane space to maintain maintenance of crista junctions, inner membrane architecture, and formation of contact sites to the outer membrane)                                                        |
| Pam18   | 2.33 | Protein import (subunit of the import motor (PAM complex); the PAM complex is a component of the Translocase of the Inner Mitochondrial membrane (TIM23 complex); essential J-protein co-chaperone for protein import)                                                                                                                                                                                         |
| Cbp3    | 2.35 | Proteostasis <b>and</b> protein synthesis (mitochondrial protein required for assembly of cytochrome bc <sub>1</sub> complex; forms a complex with Cbp6p that binds to mt ribosomes near the polypeptide tunnel exit and promotes assembly of Cbp3p-Cbp6p complex also interacts with newly synthesized cytochrome b (Cobp) and Cbp4p to promote assembly of Cobp into the cytochrome bc <sub>1</sub> complex) |
| Msc1    | 2.37 | Unknown                                                                                                                                                                                                                                                                                                                                                                                                        |
| Atp14   | 2.39 | ATP synthesis (subunit h of the F <sub>0</sub> sector of mitochondrial F <sub>1</sub> F <sub>0</sub> ATP synthase)                                                                                                                                                                                                                                                                                             |
| Cox13   | 2.46 | ETC/respiration <b>and</b> Proteostasis (subunit VIa of cytochrome c oxidase; present in a subclass of cytochrome c oxidase complexes that may have a role in minimizing generation of reactive oxygen species; not known to modulate activity in response to ATP; required for assembly of Rcf2p into cytochrome c oxidase - cytochrome bc <sub>1</sub> supercomplexes)                                       |
| Fmp43   | 2.47 | Metabolite transport (subunit of the mitochondrial pyruvate carrier (MPC); MPC localizes to the mitochondrial inner membrane and mediates pyruvate uptake)                                                                                                                                                                                                                                                     |
| Qcr8    | 2.58 | ETC/respiration (subunit 8 of ubiquinol cytochrome-c reductase (Complex III); Complex III is a component of the mitochondrial inner membrane electron transport chain)                                                                                                                                                                                                                                         |
| YPL109C | 2.65 | Unknown                                                                                                                                                                                                                                                                                                                                                                                                        |
| Mcx1    | 2.78 | Proteostasis (non-proteolytic ATPase of the AAA family; stimulates incorporation of the pyridoxal phosphate cofactor into Hem1p (5-aminolevulinic acid synthase))                                                                                                                                                                                                                                              |
| Cox11   | 3.04 | Proteostasis (protein required for delivery of copper to Cox1p)                                                                                                                                                                                                                                                                                                                                                |
| Acs1    | 3.06 | Carbohydrate metabolism (acetyl-coA synthetase isoform)                                                                                                                                                                                                                                                                                                                                                        |
| Her1    | 3.06 | Unknown                                                                                                                                                                                                                                                                                                                                                                                                        |
| Sco1    | 3.07 | Proteostasis <b>and</b> ETC/respiration (copper-binding protein of mitochondrial inner membrane; required for cytochrome c oxidase activity and respiration; may function to deliver copper to cytochrome c oxidase)                                                                                                                                                                                           |
| Bna4    | 3.24 | Metabolite synthesis (kynurenine 3-monooxygenase; required for the de novo biosynthesis of NAD from tryptophan via kynurenine)                                                                                                                                                                                                                                                                                 |
| Idp3    | 3.34 | Amino acid metabolism (NADP-dependent isocitrate dehydrogenase; catalyzes oxidation of isocitrate to alpha-ketoglutarate with the formation of NADP(H <sup>+</sup> ); involved in glutamate biosynthesis)                                                                                                                                                                                                      |
| Gtl1    | 3.39 | Redox homeostasis (glutathione S-transferase; involved in glutathione-glutaredoxin redox reactions)                                                                                                                                                                                                                                                                                                            |
| Aim46   | 3.80 | Unknown                                                                                                                                                                                                                                                                                                                                                                                                        |
| Atp7    | 3.95 | ATP synthesis (subunit d of the stator stalk of mitochondrial F <sub>1</sub> F <sub>0</sub> ATP synthase)                                                                                                                                                                                                                                                                                                      |
| Tim23   | 4.03 | Protein import (essential component of the TIM23 [translocase of the inner mitochondrial membrane] complex; involved in protein import into mitochondrial matrix and inner membrane)                                                                                                                                                                                                                           |
| YLR419W | 4.31 | Unknown                                                                                                                                                                                                                                                                                                                                                                                                        |
| Cbp4    | 4.83 | Proteostasis (required for assembly of cytochrome bc <sub>1</sub> complex; interacts with the Cbp3p-Cbp6p complex and newly synthesized cytochrome b (Cobp) to promote assembly of Cobp into the cytochrome bc <sub>1</sub> complex)                                                                                                                                                                           |
| Tom20   | 5.31 | Protein import (component of the TOM (translocase of outer membrane) complex; responsible for recognition and initial import steps for all mitochondrially directed proteins; acts as a receptor for incoming proteins)                                                                                                                                                                                        |
| Efr3    | 5.51 | Unknown                                                                                                                                                                                                                                                                                                                                                                                                        |
| Grx2    | 5.62 | Redox homeostasis (glutaredoxin; thioltransferase, glutathione-dependent disulfide oxidoreductase involved in maintaining redox state of target proteins, also exhibits glutathione peroxidase activity)                                                                                                                                                                                                       |
| Pet10   | 8.16 | Unknown                                                                                                                                                                                                                                                                                                                                                                                                        |
